# Supplementary material for: Complex Interplay of Genes Underlies Invasiveness in Fibrosarcoma Progression Model
Source: MDPI journal article supplement (doi:10.3390/jcm10112297), 2021-05-25
Supplement: s1 [file s1]

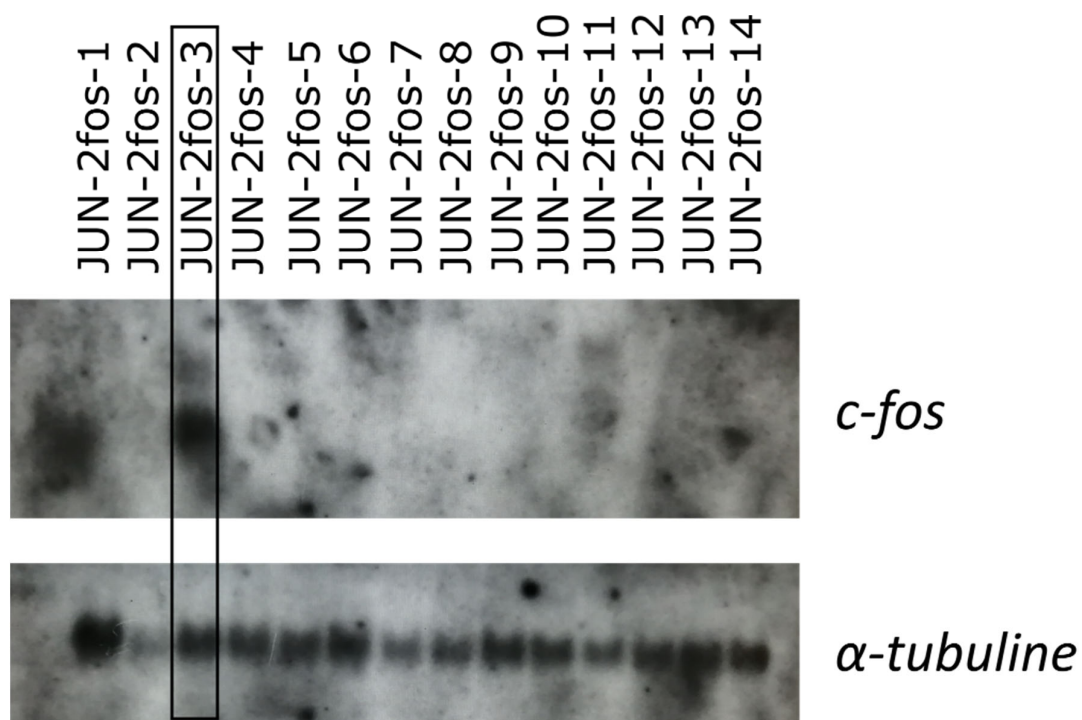

**Figure S1** Northern analysis of *c-fos* for JUN-2fos-x cell line clones

Northern analysis of *c-fos* gene expression after transfection of the CMV-*c-fos* expression vector. A single clone expressing the highest level of the *c-fos* transcript (clone 3) was designated JUN-2fos-3 and used for all other analyses.

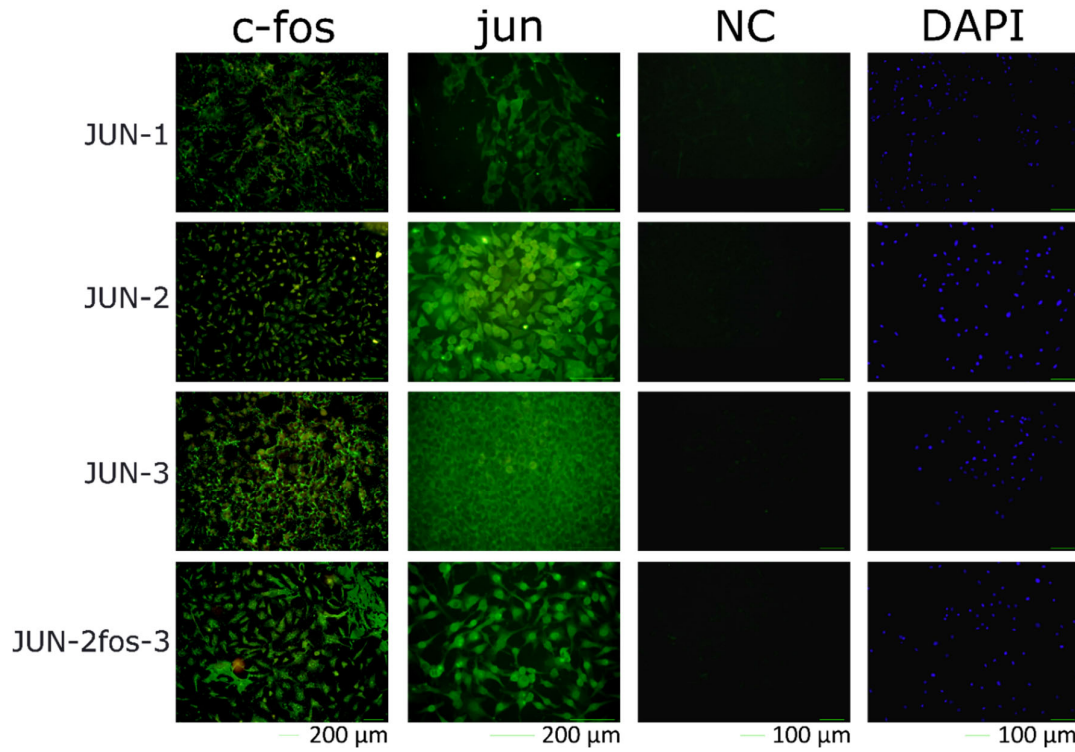

**Figure S2** Indirect immunofluorescence analysis - Fos and Jun oncoproteins expression and negative control (NC) staining, which has been carried out by omitting the respective primary antibody and the same field has been stained with DAPI staining. Pictures were taken by Olympus IX70 fluorescent microscope equipped with the Olympus DP71 camera system.

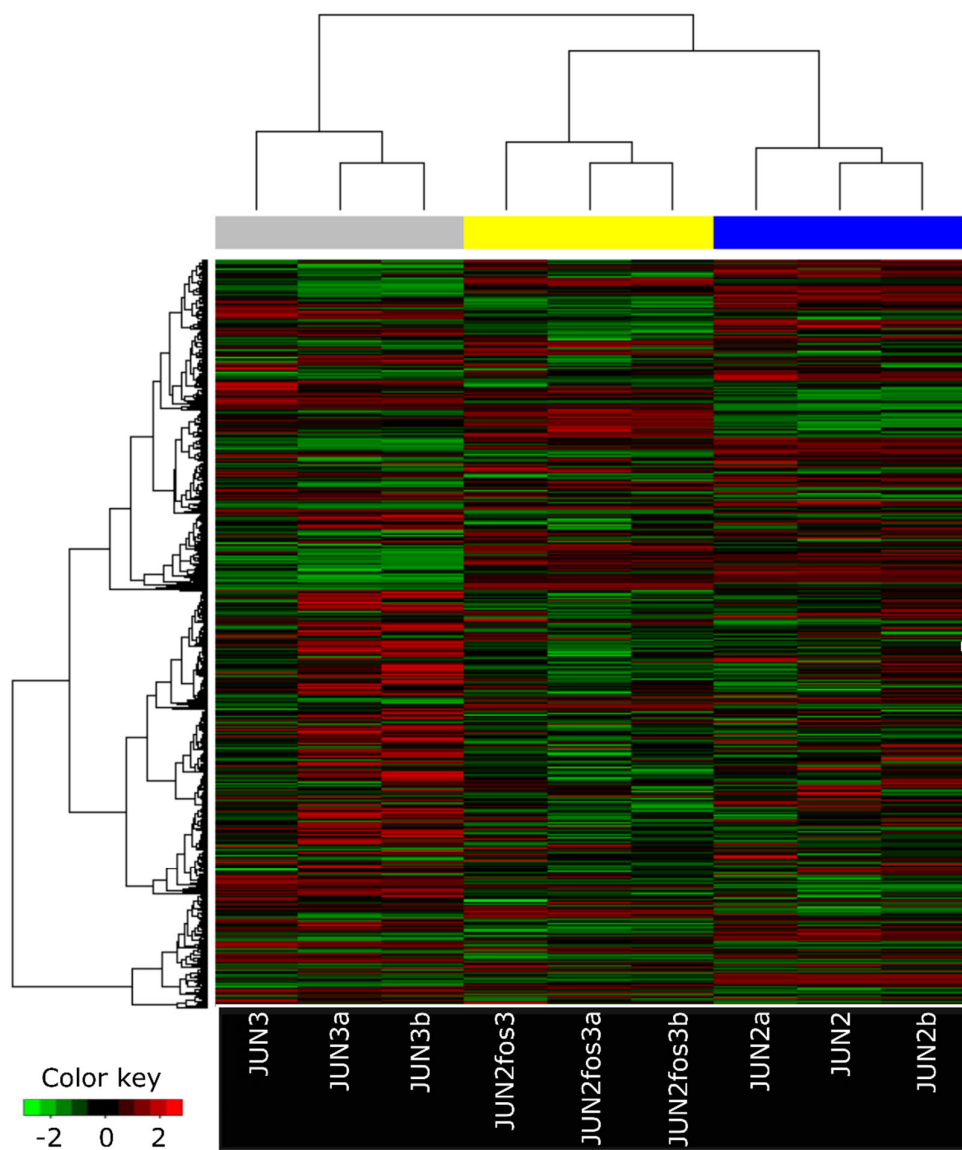

**Figure S3** Cluster dendrogram of biological replicates of sarcoma cell lines used for the transcriptomic analysis. Clustering has been carried out based on the full data matrix of expression data consisting of 22690 genes, whereas the heatmap relies on expression data of randomly selected 2000 genes.

**Table S1. Table of contrasts from comparisons of *jun* (a) and *c-fos* (b) expressions in different JUN sarcoma cell lines.** Beta= effect size – the difference between cell lines with respect to the log2-transformed relative expression of *jun* (a) or *fos* (b). CI\_L and CI\_U= limits of 95% confidence intervals for the beta, based on Bias-Corrected and Accelerated (BCa) bootstrap simulations. p= raw p-value from permutational t-test. fdr\_p= p-value corrected by False Discovery Rate correction for multiple comparisons.

| (a) <i>Jun</i> expression | Beta  | CI_L  | CI_U  | p      | fdr_p  |
|---------------------------|-------|-------|-------|--------|--------|
| JUN1 vs. JUN2             | -1.41 | -1.45 | -1.37 | 0.0022 | 0.0026 |
| JUN1 vs. JUN2fos3         | -1.60 | -1.64 | -1.56 | 0.0023 | 0.0026 |
| JUN1 vs. JUN3             | -0.63 | -0.69 | -0.59 | 0.0021 | 0.0026 |
| JUN2 vs. JUN2fos3         | -0.19 | -0.25 | -0.14 | 0.0020 | 0.0026 |
| JUN2 vs. JUN3             | 0.78  | 0.71  | 0.83  | 0.0019 | 0.0026 |
| JUN2fos3 vs. JUN3         | 0.97  | 0.90  | 1.02  | 0.0026 | 0.0026 |
| (b) <i>Fos</i> expression | Beta  | CI_L  | CI_U  | p      | fdr_p  |
| JUN1 vs. JUN2             | -0.68 | -0.73 | -0.64 | 0.0026 | 0.0028 |
| JUN1 vs. JUN2fos3         | -1.73 | -1.76 | -1.70 | 0.0020 | 0.0028 |
| JUN1 vs. JUN3             | -0.35 | -0.39 | -0.31 | 0.0028 | 0.0028 |
| JUN2 vs. JUN2fos3         | -1.05 | -1.09 | -1.01 | 0.0021 | 0.0028 |
| JUN2 vs. JUN3             | 0.33  | 0.29  | 0.37  | 0.0024 | 0.0028 |
| JUN2fos3 vs. JUN3         | 1.38  | 1.35  | 1.41  | 0.0027 | 0.0028 |

**Table S2. Table of contrasts (post-hoc tests) from comparison of cell area (a), cell perimeter (b) and cell roundness (c) of different lines of sarcoma cells.** Beta= effect size – the difference between cell lines with respect to given evaluated measure. CI\_L and CI\_U= limits of the 95% confidence intervals for the beta, based on Bias-Corrected and Accelerated (BCa) bootstrap simulations. p= raw p-value from permutational t-test. fdr\_p= p-value corrected by False Discovery Rate correction for multiple comparison.

| (a) Cell area      | Beta  | CI_L  | CI_U   | p      | fdr_p  |
|--------------------|-------|-------|--------|--------|--------|
| JUN1 vs. JUN2      | 0.56  | 0.32  | 0.79   | <0.001 | <0.001 |
| JUN1 vs. JUN2fos3  | -0.59 | -0.77 | -0.39  | <0.001 | <0.001 |
| JUN1 vs. JUN3      | 1.40  | 1.18  | 1.62   | <0.001 | <0.001 |
| JUN2 vs. JUN2fos3  | -1.15 | -1.32 | -0.960 | <0.001 | <0.001 |
| JUN2 vs. JUN3      | 0.84  | 0.64  | 1.05   | <0.001 | <0.001 |
| JUN2fos3 vs. JUN3  | 1.999 | 1.83  | 2.15   | <0.001 | <0.001 |
| (b) Cell perimeter | Beta  | CI_L  | CI_U   | p      | fdr_p  |
| JUN1 vs. JUN2      | 0.77  | 0.60  | 0.91   | <0.001 | <0.001 |
| JUN1 vs. JUN2fos3  | -0.13 | -0.27 | -0.002 | 0.35   | 0.35   |
| JUN1 vs. JUN3      | 1.04  | 0.907 | 1.20   | <0.001 | 0.0013 |
| JUN2 vs. JUN2fos3  | -0.90 | -1.05 | -0.73  | <0.001 | <0.001 |
| JUN2 vs. JUN3      | 0.27  | 0.11  | 0.45   | 0.01   | 0.012  |
| JUN2fos3 vs. JUN3  | 1.17  | 1.02  | 1.33   | <0.001 | <0.001 |
| (c) Cell roundness | Beta  | CI_L  | CI_U   | p      | fdr_p  |
| JUN1 vs. JUN2      | -0.15 | -0.21 | -0.09  | 0.011  | 0.033  |
| JUN1 vs. JUN2fos3  | -0.04 | -0.08 | 0.004  | 0.648  | 0.648  |
| JUN1 vs. JUN3      | -0.10 | -0.17 | -0.04  | 0.162  | 0.325  |
| JUN2 vs. JUN2fos3  | 0.11  | 0.05  | 0.16   | 0.002  | 0.014  |
| JUN2 vs. JUN3      | 0.05  | -0.04 | 0.12   | 0.632  | 0.648  |
| JUN2fos3 vs. JUN3  | -0.06 | -0.13 | -0.002 | 0.221  | 0.331  |

**Table S3. Table of contrasts (post-hoc tests) from comparison of proliferative capacity (a; measured as cell index), clonogenicity (b) and sarcosphere formation (c) of different lines of sarcoma cells.** *Beta*= effect size – the difference between cell lines with respect to given evaluated measure. *CI\_L* and *CI\_U*= limits of 95% confidence intervals for the *beta*, based on Bias-Corrected and Accelerated (BCa) bootstrap simulations. *p*= raw p-value from permutational t-test. *fdr\_p*= p-value corrected by False Discovery Rate correction for multiple comparison.

| (a) Cell index    | Beta   | CI_L   | CI_U   | p       | fdr_p   |
|-------------------|--------|--------|--------|---------|---------|
| JUN1 vs. JUN2     | 0.13   | 0.03   | 0.26   | 0.03177 | 0.03177 |
| JUN1 vs. JUN2fos3 | 0.44   | 0.32   | 0.56   | <0.001  | <0.001  |
| JUN1 vs. JUN3     | -0.96  | -1.40  | -0.48  | <0.001  | <0.001  |
| JUN2 vs. JUN2fos3 | 0.31   | 0.16   | 0.45   | <0.001  | <0.001  |
| JUN2 vs. JUN3     | -1.10  | -1.55  | -0.61  | <0.001  | <0.001  |
| JUN2fos3 vs. JUN3 | -1.41  | -1.86  | -0.92  | <0.001  | <0.001  |
| (c) Clonogenicity | Beta   | CI_L   | CI_U   | p       | fdr_p   |
| JUN1 vs. JUN2     | 0.97   | 0.13   | 1.87   | 0.03790 | 0.03790 |
| JUN1 vs. JUN2fos3 | 7.36   | 6.28   | 8.50   | <0.001  | <0.001  |
| JUN1 vs. JUN3     | -10.92 | -12.31 | -9.56  | <0.001  | <0.001  |
| JUN2 vs. JUN2fos3 | 6.40   | 5.18   | 7.60   | <0.001  | <0.001  |
| JUN2 vs. JUN3     | -11.89 | -13.40 | -10.41 | <0.001  | <0.001  |
| JUN2fos3 vs. JUN3 | -18.28 | -19.92 | -16.69 | <0.001  | <0.001  |
| (d) Sarcospheres  | Beta   | CI_L   | CI_U   | p       | fdr_p   |
| JUN1 vs. JUN2     | -0.06  | -0.37  | 0.28   | 0.7208  | 0.7208  |
| JUN1 vs. JUN2fos3 | -0.46  | -0.88  | -0.01  | 0.0671  | 0.0805  |
| JUN1 vs. JUN3     | -1.28  | -1.75  | -0.78  | 0.0022  | 0.0065  |
| JUN2 vs. JUN2fos3 | -0.40  | -0.78  | -0.07  | 0.0368  | 0.0552  |
| JUN2 vs. JUN3     | -1.22  | -1.62  | -0.80  | 0.0022  | 0.0065  |
| JUN2fos3 vs. JUN3 | -0.82  | -1.31  | -0.29  | 0.0130  | 0.0260  |

**Table S4. Table of contrasts (post-hoc tests) from comparison of invasiveness (a) and motility (b) of JUN-3 sarcoma cells treated with Bindarit (Bind), Maraviroc (Marav) or their combination (Comb) compared to untreated control.** Beta= effect size – the difference between cell lines with respect to given evaluated measure. CI\_L and CI\_U= limits of 95% confidence intervals for the beta, based on Bias-Corrected and Accelerated (BCa) bootstrap simulations. p= raw p-value from permutational t-test. fdr\_p= p-value corrected by False Discovery Rate correction for multiple comparison. See methods for definition of the measures states and capacities.

| (b) Invasiveness  | Beta  | CI_L  | CI_U  | p      | fdr_p  |
|-------------------|-------|-------|-------|--------|--------|
| JUN1 vs. JUN2     | 1.76  | 1.57  | 1.94  | <0.001 | <0.001 |
| JUN1 vs. JUN2fos3 | -0.40 | -0.58 | -0.23 | 0.0029 | 0.0029 |
| JUN1 vs. JUN3     | -2.38 | -2.55 | -2.21 | <0.001 | <0.001 |
| JUN2 vs. JUN2fos3 | -2.17 | -2.32 | -2.01 | <0.001 | <0.001 |
| JUN2 vs. JUN3     | -4.14 | -4.28 | -3.99 | <0.001 | <0.001 |
| JUN2fos3 vs. JUN3 | -1.97 | -2.11 | -1.84 | <0.001 | <0.001 |

**Table S5. Table of contrasts (post-hoc tests) from comparison of metabolic measures across different lines of sarcoma cells.** The metabolic measures include mitochondrial oxygen consumption in several states of high-resolution respirometry, including ROUT (a), ETS (b) and LEAK (c), spare respiratory (E-R) capacity (d), L-lactate production (e) and consumption of glucose (f). Beta= effect size – the difference between cell lines with respect to given evaluated measure. CI\_L and CI\_U= limits of 95% confidence intervals for the beta, based on Bias-Corrected and Accelerated (BCa) bootstrap simulations. p= raw p-value from permutational t-test. fdr\_p= p-value corrected by False Discovery Rate correction for multiple comparison. See methods for definition of the measures states and capacities.

| (a) ROUT          | Beta  | CI_L  | CI_U  | p      | fdr_p  |
|-------------------|-------|-------|-------|--------|--------|
| JUN1 vs. JUN2     | 389   | 128   | 685   | 0.0096 | 0.0193 |
| JUN1 vs. JUN2fos3 | -17   | -287  | 296   | 0.8984 | 0.8984 |
| JUN1 vs. jun3     | 40    | -260  | 368   | 0.8014 | 0.8984 |
| JUN2 vs. JUN2fos3 | -406  | -587  | -229  | <0.001 | 0.0030 |
| JUN2 vs. jun3     | -349  | -569  | -155  | 0.0025 | 0.0074 |
| JUN2fos3 vs. jun3 | 57    | -179  | 272   | 0.6247 | 0.8984 |
| (b) ETS           | Beta  | CI_L  | CI_U  | p      | fdr_p  |
| JUN1 vs. JUN2     | 30    | -599  | 602   | 0.924  | 0.924  |
| JUN1 vs. JUN2fos3 | -869  | -1455 | -337  | 0.007  | 0.015  |
| JUN1 vs. jun3     | -946  | -1635 | -327  | 0.012  | 0.018  |
| JUN2 vs. JUN2fos3 | -899  | -1404 | -429  | 0.003  | 0.015  |
| JUN2 vs. jun3     | -976  | -1596 | -398  | 0.006  | 0.015  |
| JUN2fos3 vs. jun3 | -77   | -654  | 468   | 0.793  | 0.924  |
| (c) LEAK          | Beta  | CI_L  | CI_U  | p      | fdr_p  |
| JUN1 vs. JUN2     | 224   | 82    | 402   | 0.0047 | 0.0140 |
| JUN1 vs. JUN2fos3 | 51    | -88   | 231   | 0.5883 | 0.5883 |
| JUN1 vs. jun3     | 89    | -88   | 291   | 0.3684 | 0.5526 |
| JUN2 vs. JUN2fos3 | -173  | -227  | -116  | <0.001 | 0.0010 |
| JUN2 vs. jun3     | -135  | -262  | -27   | 0.0411 | 0.0822 |
| JUN2fos3 vs. jun3 | 38    | -86   | 145   | 0.5270 | 0.5883 |
| (d) E-R           | Beta  | CI_L  | CI_U  | p      | fdr_p  |
| JUN1 vs. JUN2     | -359  | -811  | 84    | 0.1305 | 0.1566 |
| JUN1 vs. JUN2fos3 | -852  | -1242 | -458  | <0.001 | 0.0025 |
| JUN1 vs. jun3     | -987  | -1477 | -530  | <0.001 | 0.0025 |
| JUN2 vs. JUN2fos3 | -493  | -812  | -174  | 0.0093 | 0.0145 |
| JUN2 vs. jun3     | -628  | -1052 | -235  | 0.0097 | 0.0145 |
| JUN2fos3 vs. jun3 | -135  | -504  | 207   | 0.4743 | 0.4743 |
| (e) L-Lactate     | Beta  | CI_L  | CI_U  | p      | fdr_p  |
| JUN1 vs. JUN2     | 1.21  | 0.75  | 1.63  | 0.0022 | 0.0043 |
| JUN1 vs. JUN2fos3 | -0.91 | -1.50 | -0.42 | 0.0040 | 0.0061 |
| JUN1 vs. JUN3     | -0.74 | -1.59 | -0.04 | 0.1082 | 0.1298 |
| JUN2 vs. JUN2fos3 | -2.12 | -2.51 | -1.81 | 0.0006 | 0.0035 |
| JUN2 vs. JUN3     | -1.95 | -2.72 | -1.34 | 0.0022 | 0.0043 |
| JUN2fos3 vs. JUN3 | 0.18  | -0.61 | 0.85  | 0.6301 | 0.6301 |
| (f) glucose       | Beta  | CI_L  | CI_U  | p      | fdr_p  |
| JUN1 vs. JUN2     | -0.75 | -1.18 | -0.28 | 0.0043 | 0.0130 |
| JUN1 vs. JUN2fos3 | -1.03 | -1.63 | -0.04 | 0.0117 | 0.0175 |
| JUN1 vs. JUN3     | -1.36 | -1.93 | -0.82 | 0.0043 | 0.0130 |
| JUN2 vs. JUN2fos3 | -0.28 | -2.79 | 0.23  | 0.3368 | 0.3368 |



|                   |       |       |       |        |        |
|-------------------|-------|-------|-------|--------|--------|
| JUN2 vs. JUN3     | -0.61 | -1.10 | -0.21 | 0.0087 | 0.0173 |
| JUN2fos3 vs. JUN3 | -0.34 | -0.96 | 0.25  | 0.3157 | 0.3368 |

---

**Table S6. Genes with significantly changed expression in invasive sarcoma cell lines JUN-3 and JUN-2fos-3 compared to JUN-2**

| No. | Gene.title                                                                             | Gene.Symbol                       | 2^logFC | adj.p.val | Chromosome |
|-----|----------------------------------------------------------------------------------------|-----------------------------------|---------|-----------|------------|
| 1   | Lymphocyte antigen 6 complex, locus A                                                  | <i>Ly6a</i>                       | 11.10   | 0.000652  | 15         |
| 2   | Forkhead box D1                                                                        | <i>Foxd1</i>                      | 9.67    | 0.000083  | 13         |
| 3   | Tetraspanin 2                                                                          | <i>Tspan2</i>                     | 9.11    | 0.000150  | 3          |
| 4   | Myosin VB                                                                              | <i>Myo5b</i>                      | 8.26    | 0.000159  | 18         |
| 5   | SRY (sex determining region Y)-box 2                                                   | <i>Sox2</i>                       | 7.78    | 0.000001  | 3          |
| 6   | Teneurin transmembrane protein 3                                                       | <i>Tenm3</i>                      | 7.52    | 0.000435  | 8          |
| 7   | CD244 natural killer cell receptor 2B4                                                 | <i>Cd244</i>                      | 6.07    | 0.000229  | 1          |
| 8   | Sema domain, immunoglobulin domain (Ig), short basic domain, secreted, (semaphorin) 3A | <i>Sema3a</i>                     | 6.00    | 0.000097  | 5          |
| 9   | C-fos induced growth factor                                                            | <i>Figf</i>                       | 5.85    | 0.000138  | X          |
| 10  | Protein kinase, cgmp-dependent, type II                                                | <i>Prkg2</i>                      | 5.82    | 0.000579  | 5          |
| 11  | Keratin 13                                                                             | <i>Krt13</i>                      | 5.70    | 0.000071  | 11         |
| 12  | Matrilin 2                                                                             | <i>Matn2</i>                      | 5.32    | 0.000026  | 15         |
| 13  | Collagen, type VI, alpha 3                                                             | <i>Col6a3</i>                     | 5.22    | 0.000001  | 1          |
| 14  | Carbohydrate sulfotransferase 11 /// phosphatase and actin regulator 1                 | <i>Chst11</i> /// <i>Phactr1</i>  | 4.80    | 0.000010  | 10///13    |
| 15  | Max dimerization protein 3                                                             | <i>Mxd3</i>                       | 4.78    | 0.000919  | 13         |
| 16  | Spindle and kinetochore associated complex subunit 1                                   | <i>Ska1</i>                       | 4.74    | 0.000018  | 18         |
| 17  | Calponin 2                                                                             | <i>Cnn2</i>                       | 4.60    | 0.000003  | 10         |
| 18  | Arylsulfatase i                                                                        | <i>Arsi</i>                       | 4.41    | 0.000297  | 18         |
| 19  | Chemokine (C-C motif) ligand 8                                                         | <i>Ccl8</i>                       | 4.34    | 0.000003  | 11         |
| 20  | CD244 natural killer cell receptor 2B4 /// natural killer cell receptor 2B4-like       | <i>Cd244</i> /// <i>LOC677008</i> | 3.96    | 0.000903  | 1///???    |
| 21  | GLI pathogenesis-related 1 (glioma)                                                    | <i>Glpr1</i>                      | 3.96    | 0.000194  | 10         |
| 22  | Star-related lipid transfer (START) domain containing 4                                | <i>Stard4</i>                     | 3.94    | 0.000158  | 18         |
| 23  | Methyltransferase like 7A1                                                             | <i>Mettl7a1</i>                   | 3.84    | 0.000114  | 15         |
| 24  | Rho gtpase activating protein 18                                                       | <i>Arhgap18</i>                   | 3.67    | 0.000021  | 10         |
| 25  | Cytochrome b-561                                                                       | <i>Cyb561</i>                     | 3.65    | 0.000071  | 11         |
| 26  | Protein kinase C, delta binding protein                                                | <i>Prkcdbp</i>                    | 3.63    | 0.000122  | 7          |
| 27  | Ras homolog gene family, member J                                                      | <i>Rhoj</i>                       | 3.52    | 0.000136  | 12         |
| 28  | Reproductive homeobox 5                                                                | <i>Rhox5</i>                      | 3.50    | 0.000006  | X          |
| 29  | Chromodomain helicase DNA binding protein 3, opposite strand                           | <i>Chd3os</i>                     | 3.47    | 0.000138  | 11         |
| 30  | WW, C2 and coiled-coil domain containing 1                                             | <i>Wwc1</i>                       | 3.43    | 0.000248  | 11         |
| 31  | MACRO domain containing 2                                                              | <i>Macrod2</i>                    | 3.42    | 0.000161  | 2          |
| 32  | Dynamin 3, opposite strand /// microRNA 214                                            | <i>Dnm3os</i> /// <i>Mir214</i>   | 3.38    | 0.000215  | 1///1      |
| 33  | CD109 antigen                                                                          | <i>Cd109</i>                      | 3.34    | 0.000071  | 9          |
| 34  | Family with sequence similarity 13, member C                                           | <i>Fam13c</i>                     | 3.33    | 0.000572  | 10         |
| 35  | PDZ and LIM domain 2                                                                   | <i>Pdlim2</i>                     | 3.25    | 0.000043  | 14         |
| 36  | Dynamin 1                                                                              | <i>Dnm1</i>                       | 3.22    | 0.000216  | 2          |
| 37  | Testis derived transcript                                                              | <i>Tes</i>                        | 3.22    | 0.000015  | 6          |
| 38  | Progressive ankylosis                                                                  | <i>Ank</i>                        | 3.18    | 0.000006  | 15         |

|    |                                                                     |                 |      |          |    |
|----|---------------------------------------------------------------------|-----------------|------|----------|----|
| 39 | Vanin 1                                                             | <i>Vnn1</i>     | 3.18 | 0.000882 | 10 |
| 40 | Fyn-related kinase                                                  | <i>Frk</i>      | 3.13 | 0.000470 | 10 |
| 41 | Fibrinogen-like protein 2                                           | <i>Fgl2</i>     | 3.07 | 0.000249 | 5  |
| 42 | Death-associated protein                                            | <i>Dap</i>      | 2.96 | 0.000171 | 15 |
| 43 | Phosphatase and actin regulator 1                                   | <i>Phactr1</i>  | 2.96 | 0.000340 | 13 |
| 44 | Kinesin family member 20A                                           | <i>Kif20a</i>   | 2.92 | 0.000132 | 18 |
| 45 | RAB32, member RAS oncogene family                                   | <i>Rab32</i>    | 2.92 | 0.000061 | 10 |
| 46 | Doublecortin-like kinase 1                                          | <i>Dclk1</i>    | 2.91 | 0.000860 | 3  |
| 47 | Angiopoietin 2                                                      | <i>Angpt2</i>   | 2.89 | 0.000005 | 8  |
| 48 | KH domain containing, RNA binding, signal transduction associated 3 | <i>Khdrbs3</i>  | 2.88 | 0.000484 | 15 |
| 49 | Phosphofructokinase, platelet                                       | <i>Pfkip</i>    | 2.86 | 0.000003 | 13 |
| 50 | Methyltransferase like 7A2                                          | <i>Mettl7a2</i> | 2.76 | 0.000235 | 15 |
| 51 | Leucine-rich repeat kinase 2                                        | <i>Lrrk2</i>    | 2.76 | 0.000123 | 15 |
| 52 | CD80 antigen                                                        | <i>Cd80</i>     | 2.76 | 0.000152 | 16 |
| 53 | Aldehyde dehydrogenase 1 family, member L1                          | <i>Aldh1l1</i>  | 2.73 | 0.000014 | 6  |
| 54 | Cyclin-dependent kinase inhibitor 1A (P21)                          | <i>Cdkn1a</i>   | 2.67 | 0.000296 | 17 |
| 55 | DNA replication helicase 2 homolog (yeast)                          | <i>Dna2</i>     | 2.61 | 0.000772 | 10 |
| 56 | Ectopic ossification 1                                              | <i>Etos1</i>    | 2.59 | 0.000174 | 7  |
| 57 | Ring finger protein 130                                             | <i>Rnf130</i>   | 2.58 | 0.000084 | 11 |
| 58 | Dual specificity phosphatase 6                                      | <i>Dusp6</i>    | 2.55 | 0.000129 | 10 |
| 59 | Sulfatase 2                                                         | <i>Sulf2</i>    | 2.55 | 0.000782 | 2  |
| 60 | NAD(P) dependent steroid dehydrogenase-like                         | <i>Nsdhl</i>    | 2.53 | 0.000015 | X  |
| 61 | Hexokinase 1                                                        | <i>Hk1</i>      | 2.52 | 0.000330 | 10 |
| 62 | Complement component 3a receptor 1                                  | <i>C3ar1</i>    | 2.39 | 0.000782 | 6  |
| 63 | Tripartite motif-containing 24                                      | <i>Trim24</i>   | 2.38 | 0.000111 | 6  |
| 64 | Integrin beta 2                                                     | <i>Itgb2</i>    | 2.31 | 0.000378 | 10 |
| 65 | Thrombospondin 2                                                    | <i>Thbs2</i>    | 2.29 | 0.000168 | 17 |
| 66 | Family with sequence similarity 19, member A5                       | <i>Fam19a5</i>  | 2.28 | 0.000252 | 15 |
| 67 | Pleckstrin homology-like domain, family A, member 1                 | <i>Phlda1</i>   | 2.27 | 0.000824 | 10 |
| 68 | Ral guanine nucleotide dissociation stimulator,-like 1              | <i>Rgl1</i>     | 2.27 | 0.000867 | 1  |
| 69 | Camp responsive element binding protein 3-like 2                    | <i>Creb3l2</i>  | 2.26 | 0.000304 | 6  |
| 70 | Hematological and neurological expressed sequence 1                 | <i>Hn1</i>      | 2.25 | 0.000229 | 11 |
| 71 | Epithelial membrane protein 3                                       | <i>Emp3</i>     | 2.25 | 0.000269 | 7  |
| 72 | Non-SMC condensin II complex, subunit H2                            | <i>Ncaph2</i>   | 2.24 | 0.000657 | 15 |
| 73 | Sorcin                                                              | <i>Sri</i>      | 2.23 | 0.000118 | 5  |
| 74 | Baculoviral IAP repeat-containing 5                                 | <i>Birc5</i>    | 2.23 | 0.000929 | 11 |
| 75 | Inositol (myo)-1(or 4)-monophosphatase 2                            | <i>Impa2</i>    | 2.19 | 0.000702 | 18 |
| 76 | Zinc finger homeodomain 4                                           | <i>Zfx4</i>     | 2.18 | 0.000936 | 3  |
| 77 | Apoptotic peptidase activating factor 1                             | <i>Apaf1</i>    | 2.18 | 0.000968 | 10 |
| 78 | Vps20-associated 1 homolog (S. Cerevisiae)                          | <i>Vta1</i>     | 2.18 | 0.000151 | 10 |

|     |                                                                                        |                         |      |          |         |
|-----|----------------------------------------------------------------------------------------|-------------------------|------|----------|---------|
| 79  | Sulfiredoxin 1 homolog (S. Cerevisiae)                                                 | <i>Srxn1</i>            | 2.18 | 0.000253 | 2       |
| 80  | Lamin B1                                                                               | <i>Lmnb1</i>            | 2.16 | 0.000229 | 18      |
| 81  | Potassium channel tetramerisation domain containing 10                                 | <i>Kctd10</i>           | 2.16 | 0.000320 | 5       |
| 82  | FERM domain containing 6                                                               | <i>Frmd6</i>            | 2.15 | 0.000689 | 12      |
| 83  | Dnaj (Hsp40) homolog, subfamily C, member 9                                            | <i>Dnajc9</i>           | 2.15 | 0.000659 | 14      |
| 84  | Biogenesis of lysosomal organelles complex-1, subunit 1 /// retinol dehydrogenase 5    | <i>Bloc1s1 /// Rdh5</i> | 2.14 | 0.000284 | 10///10 |
| 85  | Brain-specific angiogenesis inhibitor 1-associated protein 2                           | <i>Baiap2</i>           | 2.14 | 0.000169 | 11      |
| 86  | Cyclin D1                                                                              | <i>Ccnd1</i>            | 2.14 | 0.000898 | 7       |
| 87  | Intraflagellar transport 27                                                            | <i>Ift27</i>            | 2.14 | 0.000913 | 15      |
| 88  | IQ motif containing gtpase activating protein 3                                        | <i>Iqgap3</i>           | 2.13 | 0.000203 | 3       |
| 89  | Potassium channel, subfamily K, member 2                                               | <i>Kcnk2</i>            | 2.12 | 0.000265 | 1       |
| 90  | DNA primase, p49 subunit                                                               | <i>Prim1</i>            | 2.11 | 0.000955 | 10      |
| 91  | Ubiquitin-conjugating enzyme E2G 2                                                     | <i>Ube2g2</i>           | 2.04 | 0.000248 | 10      |
| 92  | DNA segment, Chr 10, Wayne State University 102, expressed                             | <i>D10Wsu102e</i>       | 2.03 | 0.000248 | 10      |
| 93  | Transcription factor 4                                                                 | <i>Tcf4</i>             | 2.03 | 0.000533 | 18      |
| 94  | G two S phase expressed protein 1                                                      | <i>Gtse1</i>            | 2.02 | 0.000440 | 15      |
| 95  | Single-pass membrane protein with aspartate rich tail 1                                | <i>Smdt1</i>            | 2.00 | 0.000124 | 15      |
| 96  | Histone deacetylase 5                                                                  | <i>Hdac5</i>            | 1.99 | 0.000382 | 11      |
| 97  | Solute carrier family 25 (mitochondrial carrier, dicarboxylate transporter), member 10 | <i>Slc25a10</i>         | 1.99 | 0.000292 | 11      |
| 98  | Jerky                                                                                  | <i>Jrk</i>              | 1.98 | 0.000980 | 15      |
| 99  | Choline kinase beta                                                                    | <i>Chkb</i>             | 1.96 | 0.000867 | 15      |
| 100 | RIKEN cdna 1110007C09 gene                                                             | <i>1110007C09Rik</i>    | 1.95 | 0.000419 | 13      |
| 101 | Trafficking protein particle complex 1                                                 | <i>Trappc1</i>          | 1.93 | 0.000389 | 17      |
| 102 | Dedicator of cytokinesis 9                                                             | <i>Dock9</i>            | 1.91 | 0.000640 | 14      |
| 103 | Casein kinase 1, gamma 2                                                               | <i>Csnk1g2</i>          | 1.91 | 0.000480 | 10      |
| 104 | Protein inhibitor of activated STAT 3                                                  | <i>Pias3</i>            | 1.89 | 0.000540 | 3       |
| 105 | Solute carrier family 48 (heme transporter), member 1                                  | <i>Slc48a1</i>          | 1.89 | 0.000150 | 15      |
| 106 | Centrin 3                                                                              | <i>Cetn3</i>            | 1.88 | 0.000109 | 13      |
| 107 | PQ loop repeat containing                                                              | <i>Pqlc3</i>            | 1.88 | 0.000818 | 12      |
| 108 | Myosin, heavy polypeptide 9, non-muscle                                                | <i>Myh9</i>             | 1.86 | 0.000686 | 15      |
| 109 | Budding uninhibited by benzimidazoles 1 homolog, beta (S. Cerevisiae)                  | <i>Bub1b</i>            | 1.85 | 0.000901 | 2       |
| 110 | Coatomer protein complex, subunit zeta 1                                               | <i>Copz1</i>            | 1.83 | 0.000284 | 15      |
| 111 | WD repeat domain 1                                                                     | <i>Wdr1</i>             | 1.81 | 0.000688 | 5       |
| 112 | Mediator complex subunit 30                                                            | <i>Med30</i>            | 1.81 | 0.000463 | 15      |
| 113 | Tubulin, alpha 4A                                                                      | <i>Tuba4a</i>           | 1.78 | 0.000671 | 1       |
| 114 | Hyaluronan mediated motility receptor (RHAMM)                                          | <i>Hmmr</i>             | 1.77 | 0.000570 | 11      |

|     |                                                                                |                      |         |          |       |
|-----|--------------------------------------------------------------------------------|----------------------|---------|----------|-------|
| 115 | Katanin p60 (atpase-containing) subunit A1                                     | <i>Katna1</i>        | 1.77    | 0.000892 | 10    |
| 116 | Pituitary tumor-transforming gene 1                                            | <i>Pttg1</i>         | 1.77    | 0.000393 | 11    |
| 117 | SEC63-like (S. Cerevisiae)                                                     | <i>Sec63</i>         | 1.74    | 0.000617 | 10    |
| 118 | Nuclear factor of activated T cells, cytoplasmic, calcineurin dependent 1      | <i>Nfatc1</i>        | 1.70    | 0.000980 | 18    |
| 119 | RIKEN cdna 2700094K13 gene                                                     | <i>2700094K13Rik</i> | 1.70    | 0.000931 | 2     |
| 120 | Proteasome (prosome, macropain) activator subunit 4                            | <i>Psme4</i>         | 1.69    | 0.000688 | 11    |
| 121 | Mckusick-Kaufman syndrome                                                      | <i>Mkks</i>          | 1.69    | 0.000980 | 2     |
| 122 | Family with sequence similarity 114, member A1                                 | <i>Fam114a1</i>      | 1.64    | 0.000819 | 5     |
| 123 | Ankyrin repeat domain 13a                                                      | <i>Ankrd13a</i>      | 1.64    | 0.000737 | 5     |
| 124 | SAR1 gene homolog A (S. Cerevisiae)                                            | <i>Sar1a</i>         | 1.61    | 0.000572 | 10    |
| 125 | Tubulin, beta 4B class IVB                                                     | <i>Tubb4b</i>        | 1.60    | 0.000704 | 2     |
| 126 | N-deacetylase/N-sulfotransferase (heparan glucosaminyl) 1                      | <i>Ndst1</i>         | 1.58    | 0.000877 | 18    |
| 1   | Matrix metalloproteinase 13                                                    | <i>Mmp13</i>         | -223.43 | 0.000000 | 9     |
| 2   | Inactive X specific transcripts                                                | <i>Xist</i>          | -99.33  | 0.000000 | X     |
| 3   | Serum amyloid A 3                                                              | <i>Saa3</i>          | -59.95  | 0.000265 | 7     |
| 4   | Trypsin 4 /// trypsin 5                                                        | <i>Try4 /// Try5</i> | -43.01  | 0.000000 | 6///6 |
| 5   | SRY (sex determining region Y)-box 11                                          | <i>Sox11</i>         | -36.01  | 0.000000 | 12    |
| 6   | Insulin-like growth factor binding protein 5                                   | <i>Igfbp5</i>        | -35.54  | 0.000867 | 1     |
| 7   | Acyl-coa thioesterase 1                                                        | <i>Acot1</i>         | -32.16  | 0.000000 | 12    |
| 8   | Ceruloplasmin                                                                  | <i>Cp</i>            | -29.55  | 0.000168 | 3     |
| 9   | Interleukin 13 receptor, alpha 2                                               | <i>Il13ra2</i>       | -24.74  | 0.000000 | X     |
| 10  | Cholinergic receptor, nicotinic, beta polypeptide 1 (muscle)                   | <i>Chrn1</i>         | -22.38  | 0.000001 | 11    |
| 11  | Transmembrane protein 176B                                                     | <i>Tmem176b</i>      | -22.31  | 0.000000 | 6     |
| 12  | Regulator of calcineurin 2                                                     | <i>Rcan2</i>         | -22.14  | 0.000002 | 17    |
| 13  | Fibroblast growth factor 7                                                     | <i>Fgf7</i>          | -22.02  | 0.000000 | 2     |
| 14  | ATP-binding cassette, sub-family G (WHITE), member 2                           | <i>Abcg2</i>         | -21.13  | 0.000000 | 6     |
| 15  | Solute carrier family 24 (sodium/potassium/calcium exchanger), member 3        | <i>Slc24a3</i>       | -21.00  | 0.000001 | 2     |
| 16  | Guanine deaminase                                                              | <i>Gda</i>           | -20.04  | 0.000000 | 19    |
| 17  | Lysophosphatidic acid receptor 4                                               | <i>Lpar4</i>         | -19.84  | 0.000008 | X     |
| 18  | Epidermal growth factor-containing fibulin-like extracellular matrix protein 1 | <i>Efemp1</i>        | -19.12  | 0.000000 | 11    |
| 19  | Leucine rich repeat protein 1, neuronal                                        | <i>Lrrn1</i>         | -18.34  | 0.000002 | 6     |
| 20  | Transmembrane protein 176A                                                     | <i>Tmem176a</i>      | -17.55  | 0.000003 | 6     |
| 21  | Aldo-keto reductase family 1, member C18                                       | <i>Akr1c18</i>       | -16.91  | 0.000005 | 13    |
| 22  | Cadherin 15                                                                    | <i>Cdh15</i>         | -16.72  | 0.000000 | 8     |
| 23  | Clusterin                                                                      | <i>Clu</i>           | -15.86  | 0.000002 | 14    |
| 24  | Immunoglobulin superfamily, DCC subclass, member 4                             | <i>Igdcc4</i>        | -15.85  | 0.000002 | 9     |
| 25  | Collagen, type IV, alpha 2                                                     | <i>Col4a2</i>        | -15.39  | 0.000000 | 8     |
| 26  | Haptoglobin                                                                    | <i>Hp</i>            | -15.18  | 0.000000 | 8     |
| 27  | Bradykinin receptor, beta 1                                                    | <i>Bdkrb1</i>        | -15.08  | 0.000003 | 12    |

|    |                                                                                                               |                        |        |          |         |
|----|---------------------------------------------------------------------------------------------------------------|------------------------|--------|----------|---------|
| 28 | Heparan sulfate 6-O-sulfotransferase 2                                                                        | <i>Hs6st2</i>          | -14.08 | 0.000001 | X       |
| 29 | Sphingomyelin phosphodiesterase, acid-like 3B                                                                 | <i>Smpdl3b</i>         | -13.69 | 0.000163 | 4       |
| 30 | S100 calcium binding protein A8 (calgranulin A)                                                               | <i>S100a8</i>          | -13.53 | 0.000001 | 3       |
| 31 | A disintegrin-like and metallopeptidase (reprolysin type) with thrombospondin type 1 motif, 5 (aggrecanase-2) | <i>Adamts5</i>         | -12.70 | 0.000168 | 16      |
| 32 | Protein kinase D1                                                                                             | <i>Prkd1</i>           | -12.46 | 0.000082 | 12      |
| 33 | PDZ and LIM domain 3                                                                                          | <i>Pdlim3</i>          | -12.12 | 0.000000 | 8       |
| 34 | Lipocalin 2                                                                                                   | <i>Lcn2</i>            | -12.07 | 0.000001 | 2       |
| 35 | Acyl-coa thioesterase 1 /// acyl-coa thioesterase 2                                                           | <i>Acot1 /// Acot2</i> | -11.51 | 0.000000 | 12///12 |
| 36 | Ankyrin repeat domain 1 (cardiac muscle)                                                                      | <i>Ankrd1</i>          | -10.93 | 0.000522 | 19      |
| 37 | Collagen, type IV, alpha 1                                                                                    | <i>Col4a1</i>          | -10.79 | 0.000424 | 8       |
| 38 | Desmocollin 2                                                                                                 | <i>Dsc2</i>            | -10.37 | 0.000000 | 18      |
| 39 | Chemokine (C-X-C motif) ligand 5                                                                              | <i>Cxcl5</i>           | -10.16 | 0.000069 | 5       |
| 40 | Connective tissue growth factor                                                                               | <i>Ctgf</i>            | -9.85  | 0.000001 | 10      |
| 41 | Starch binding domain 1                                                                                       | <i>Stbd1</i>           | -9.31  | 0.000007 | 5       |
| 42 | Nuclear paraspeckle assembly transcript 1 (non-protein coding)                                                | <i>Neat1</i>           | -8.87  | 0.000347 | 19      |
| 43 | Titin                                                                                                         | <i>Ttn</i>             | -8.76  | 0.000145 | 2       |
| 44 | Ectonucleotide pyrophosphatase/phosphodiesterase 5                                                            | <i>Enpp5</i>           | -8.71  | 0.000106 | 17      |
| 45 | Nephronectin                                                                                                  | <i>Npnt</i>            | -8.34  | 0.000242 | 3       |
| 46 | Signal-regulatory protein alpha                                                                               | <i>Sirpa</i>           | -8.32  | 0.000472 | 2       |
| 47 | RIKEN cdna D430019H16 gene                                                                                    | <i>D430019H16Rik</i>   | -8.27  | 0.000001 | 12      |
| 48 | Matrix metallopeptidase 3                                                                                     | <i>Mmp3</i>            | -8.26  | 0.000529 | 9       |
| 49 | Scavenger receptor class A, member 3                                                                          | <i>Scara3</i>          | -8.21  | 0.000000 | 14      |
| 50 | CDC42 effector protein (Rho gtpase binding) 3                                                                 | <i>Cdc42ep3</i>        | -7.96  | 0.000250 | 17      |
| 51 | CCAAT/enhancer binding protein (C/EBP), delta                                                                 | <i>Cebpd</i>           | -7.94  | 0.000009 | 16      |
| 52 | Serum deprivation response                                                                                    | <i>Sdpr</i>            | -7.90  | 0.000504 | 1       |
| 53 | Armadillo repeat containing, X-linked 4                                                                       | <i>Armxc4</i>          | -7.83  | 0.000001 | 9       |
| 54 | Iroquois related homeobox 3                                                                                   | <i>Irx3</i>            | -7.48  | 0.000000 | 8       |
| 55 | Protocadherin 18                                                                                              | <i>Pcdh18</i>          | -7.47  | 0.000011 | 3       |
| 56 | Thrombospondin 3                                                                                              | <i>Thbs3</i>           | -7.44  | 0.000003 | 3       |
| 57 | SH3 domain binding glutamic acid-rich protein like 2                                                          | <i>Sh3bgrl2</i>        | -6.99  | 0.000092 | 9       |
| 58 | ATPase, Na+/K+ transporting, alpha 3 polypeptide                                                              | <i>Atp1a3</i>          | -6.69  | 0.000997 | 7       |
| 59 | Interleukin 1 receptor antagonist                                                                             | <i>Il1rn</i>           | -6.67  | 0.000027 | 2       |
| 60 | Very low density lipoprotein receptor                                                                         | <i>Vldlr</i>           | -6.54  | 0.000097 | 19      |
| 61 | Solute carrier family 44, member 2                                                                            | <i>Slc44a2</i>         | -6.46  | 0.000275 | 9       |
| 62 | Adenosine A2b receptor                                                                                        | <i>Adora2b</i>         | -6.43  | 0.000005 | 11      |
| 63 | Paired box 7                                                                                                  | <i>Pax7</i>            | -6.37  | 0.000338 | 4       |
| 64 | Solute carrier family 16 (monocarboxylic acid transporters), member 1                                         | <i>Slc16a1</i>         | -6.21  | 0.000473 | 3       |
| 65 | Oligodendrocyte transcription factor 1                                                                        | <i>Olig1</i>           | -6.19  | 0.000001 | 16      |
| 66 | Collagen, type V, alpha 2                                                                                     | <i>Col5a2</i>          | -6.15  | 0.000015 | 1       |

|     |                                                                                     |                         |       |          |    |
|-----|-------------------------------------------------------------------------------------|-------------------------|-------|----------|----|
| 67  | Frizzled homolog 4 (Drosophila)                                                     | <i>Fzd4</i>             | -5.96 | 0.000006 | 7  |
| 68  | Family with sequence similarity 132, member A                                       | <i>Fam132a</i>          | -5.95 | 0.000175 | 1  |
| 69  | Abhydrolase domain containing 6                                                     | <i>Abhd6</i>            | -5.89 | 0.000007 | 14 |
| 70  | Zinc finger protein, multitype 2                                                    | <i>Zfp2</i>             | -5.86 | 0.000064 | 15 |
| 71  | CDC42 effector protein (Rho gtpase binding) 5                                       | <i>Cdc42ep5</i>         | -5.78 | 0.000011 | 7  |
| 72  | Glycoprotein 49 A /// leukocyte immunoglobulin-like receptor, subfamily B, member 4 | <i>Gp49a /// Lilrb4</i> | -5.71 | 0.000027 | 10 |
| 73  | Family with sequence similarity 213, member A                                       | <i>Fam213a</i>          | -5.71 | 0.000236 | 10 |
| 74  | WAP four-disulfide core domain 2                                                    | <i>Wfdc2</i>            | -5.65 | 0.000008 | 2  |
| 75  | Membrane bound O-acyltransferase domain containing 2                                | <i>Mboat2</i>           | -5.63 | 0.000021 | 12 |
| 76  | Histocompatibility 2, D region locus 1                                              | <i>H2-D1</i>            | -5.59 | 0.000870 | 17 |
| 77  | Cdna sequence BC002189                                                              | <i>BC002189</i>         | -5.46 | 0.000480 | 3  |
| 78  | Leptin receptor                                                                     | <i>Lepr</i>             | -5.38 | 0.000704 | 4  |
| 79  | Junction adhesion molecule 3                                                        | <i>Jam3</i>             | -5.32 | 0.000014 | 9  |
| 80  | Protein tyrosine phosphatase, receptor type, D                                      | <i>Ptprd</i>            | -5.26 | 0.000048 | 4  |
| 81  | Nucleolar protein 3 (apoptosis repressor with CARD domain)                          | <i>Nol3</i>             | -5.19 | 0.000311 | 8  |
| 82  | Secretory leukocyte peptidase inhibitor                                             | <i>Slpi</i>             | -5.13 | 0.000009 | 2  |
| 83  | Cathepsin F                                                                         | <i>Ctsf</i>             | -5.04 | 0.000530 | 19 |
| 84  | Kruppel-like factor 2 (lung)                                                        | <i>Klf2</i>             | -4.96 | 0.000008 | 8  |
| 85  | Nidogen 2                                                                           | <i>Nid2</i>             | -4.81 | 0.000002 | 14 |
| 86  | Transmembrane protein 38B                                                           | <i>Tmem38b</i>          | -4.75 | 0.000435 | 4  |
| 87  | Histocompatibility 2, K1, K region                                                  | <i>H2-K1</i>            | -4.72 | 0.000254 | 17 |
| 88  | Ankyrin repeat domain 10                                                            | <i>Ankrd10</i>          | -4.67 | 0.000110 | 8  |
| 89  | Integrin alpha 6                                                                    | <i>Itga6</i>            | -4.67 | 0.000012 | 2  |
| 90  | Solute carrier family 40 (iron-regulated transporter), member 1                     | <i>Slc40a1</i>          | -4.54 | 0.000621 | 1  |
| 91  | Transforming growth factor, beta 2                                                  | <i>Tgfb2</i>            | -4.48 | 0.000045 | 1  |
| 92  | Scavenger receptor class A, member 5 (putative)                                     | <i>Scara5</i>           | -4.41 | 0.000010 | 14 |
| 93  | Distal-less homeobox 4                                                              | <i>Dlx4</i>             | -4.26 | 0.000037 | 11 |
| 94  | Histocompatibility 13                                                               | <i>H13</i>              | -4.06 | 0.000275 | 2  |
| 95  | S100 calcium binding protein A16                                                    | <i>S100a16</i>          | -3.98 | 0.000004 | 3  |
| 96  | MACRO domain containing 1                                                           | <i>Macrocl1</i>         | -3.98 | 0.000403 | 19 |
| 97  | Oncostatin M receptor                                                               | <i>Osmr</i>             | -3.96 | 0.000104 | 15 |
| 98  | Zinc finger protein of the cerebellum 2                                             | <i>Zic2</i>             | -3.95 | 0.000016 | 14 |
| 99  | Coxsackie virus and adenovirus receptor                                             | <i>Cxadr</i>            | -3.94 | 0.000034 | 16 |
| 100 | 3-hydroxybutyrate dehydrogenase, type 1                                             | <i>Bdh1</i>             | -3.91 | 0.000042 | 16 |
| 101 | Plasminogen activator, tissue                                                       | <i>Plat</i>             | -3.90 | 0.000621 | 8  |
| 102 | Estrogen related receptor, beta                                                     | <i>Esrrb</i>            | -3.90 | 0.000162 | 12 |
| 103 | Myomesin 2                                                                          | <i>Myom2</i>            | -3.89 | 0.000091 | 8  |
| 104 | Arrestin domain containing 4                                                        | <i>Arrdc4</i>           | -3.88 | 0.000980 | 7  |
| 105 | Acyl-coa thioesterase 4                                                             | <i>Acot4</i>            | -3.87 | 0.000114 | 12 |
| 106 | Basonuclin 1                                                                        | <i>Bnc1</i>             | -3.86 | 0.000014 | 7  |
| 107 | RAR-related orphan receptor gamma                                                   | <i>Rorc</i>             | -3.82 | 0.000083 | 3  |

|     |                                                                                    |                                      |       |          |    |
|-----|------------------------------------------------------------------------------------|--------------------------------------|-------|----------|----|
| 108 | CD59a antigen                                                                      | <i>Cd59a</i>                         | -3.79 | 0.000621 | 2  |
| 109 | Ferredoxin 1-like /// Raver1-Fdx11 readthrough                                     | <i>Fdx11</i> /// <i>Raver1-fdx11</i> | -3.75 | 0.000005 | 9  |
| 110 | Schlafen 2                                                                         | <i>Slfn2</i>                         | -3.69 | 0.000248 | 11 |
| 111 | Serglycin                                                                          | <i>Srgn</i>                          | -3.68 | 0.000113 | 10 |
| 112 | Junction adhesion molecule 2                                                       | <i>Jam2</i>                          | -3.68 | 0.000213 | 16 |
| 113 | Brain expressed myelocytomatosis oncogene                                          | <i>Bmyc</i>                          | -3.51 | 0.000229 | 2  |
| 114 | Protocadherin 1                                                                    | <i>Pcdh1</i>                         | -3.50 | 0.000931 | 18 |
| 115 | Interferon gamma inducible protein 30                                              | <i>Ifi30</i>                         | -3.49 | 0.000049 | 8  |
| 116 | Acyl-coa thioesterase 2                                                            | <i>Acot2</i>                         | -3.47 | 0.000080 | 12 |
| 117 | Zinc finger protein of the cerebellum 5                                            | <i>Zic5</i>                          | -3.46 | 0.000044 | 14 |
| 118 | Complement component 3                                                             | <i>C3</i>                            | -3.45 | 0.000097 | 17 |
| 119 | Solute carrier family 6 (neurotransmitter transporter, glycine), member 9          | <i>Slc6a9</i>                        | -3.44 | 0.000011 | 4  |
| 120 | Dnaj (Hsp40) homolog, subfamily B, member 9                                        | <i>Dnajb9</i>                        | -3.41 | 0.000158 | 12 |
| 121 | F-box protein 32                                                                   | <i>Fbxo32</i>                        | -3.41 | 0.000558 | 15 |
| 122 | Spla/ryanodine receptor domain and SOCS box containing 1                           | <i>Spsb1</i>                         | -3.39 | 0.000588 | 4  |
| 123 | Tripartite motif-containing 30A                                                    | <i>Trim30a</i>                       | -3.37 | 0.000463 | 7  |
| 124 | Muscle, skeletal, receptor tyrosine kinase                                         | <i>Musk</i>                          | -3.37 | 0.000010 | 4  |
| 125 | Selenium binding protein 1                                                         | <i>Selenbp1</i>                      | -3.35 | 0.000303 | 3  |
| 126 | Ectonucleotide pyrophosphatase/phosphodiesterase 2                                 | <i>Enpp2</i>                         | -3.35 | 0.000572 | 15 |
| 127 | Presenilin 2                                                                       | <i>Psen2</i>                         | -3.33 | 0.000913 | 1  |
| 128 | Sulfide quinone reductase-like (yeast)                                             | <i>Sqrdl</i>                         | -3.31 | 0.000478 | 2  |
| 129 | Sialic acid acetyltransferase                                                      | <i>Siae</i>                          | -3.30 | 0.000336 | 9  |
| 130 | RIKEN cdna 1190002N15 gene                                                         | <i>1190002N15Rik</i>                 | -3.29 | 0.000473 | 9  |
| 131 | B cell leukemia/lymphoma 3                                                         | <i>Bcl3</i>                          | -3.29 | 0.000248 | 7  |
| 132 | Deiodinase, iodothyronine, type II                                                 | <i>Dio2</i>                          | -3.26 | 0.000042 | 12 |
| 133 | Zinc finger and BTB domain containing 46                                           | <i>Zbtb46</i>                        | -3.22 | 0.000047 | 2  |
| 134 | Ring finger protein 149                                                            | <i>Rnf149</i>                        | -3.21 | 0.000065 | 1  |
| 135 | Frizzled homolog 6 (Drosophila)                                                    | <i>Fzd6</i>                          | -3.20 | 0.000570 | 15 |
| 136 | Nuclear factor of kappa light polypeptide gene enhancer in B cells inhibitor, zeta | <i>Nfkbiz</i>                        | -3.17 | 0.000008 | 16 |
| 137 | Prolactin family 7, subfamily c, member 1                                          | <i>Prl7c1</i>                        | -3.14 | 0.000027 | 13 |
| 138 | Family with sequence similarity 195, member A                                      | <i>Fam195a</i>                       | -3.12 | 0.000027 | 17 |
| 139 | Ribosomal protein L22                                                              | <i>Rpl22</i>                         | -3.11 | 0.000023 | 4  |
| 140 | Prostaglandin reductase 1                                                          | <i>Ptgr1</i>                         | -3.09 | 0.000090 | 4  |
| 141 | Phosphoenolpyruvate carboxykinase 2 (mitochondrial)                                | <i>Pck2</i>                          | -3.05 | 0.000354 | 14 |
| 142 | Phosphoribosyl pyrophosphate synthetase 1-like 3                                   | <i>Prps1l3</i>                       | -3.05 | 0.000354 | 12 |
| 143 | Paired box 8                                                                       | <i>Pax8</i>                          | -3.04 | 0.000123 | 2  |
| 144 | Aldehyde dehydrogenase 18 family, member A1                                        | <i>Aldh18a1</i>                      | -2.99 | 0.000080 | 19 |
| 145 | Transmembrane protein 132A                                                         | <i>Tmem132a</i>                      | -2.98 | 0.000104 | 19 |
| 146 | Activating transcription factor 3                                                  | <i>Atf3</i>                          | -2.98 | 0.000129 | 1  |



|     |                                                                       |                          |       |          |       |
|-----|-----------------------------------------------------------------------|--------------------------|-------|----------|-------|
| 147 | Follistatin                                                           | <i>Fst</i>               | -2.91 | 0.000063 | 13    |
| 148 | Gap junction protein, beta 3                                          | <i>Gjb3</i>              | -2.87 | 0.000801 | 4     |
| 149 | Ribosomal protein S6                                                  | <i>Rps6</i>              | -2.86 | 0.000015 | 4     |
| 150 | Sortilin 1                                                            | <i>Sort1</i>             | -2.84 | 0.000229 | 3     |
| 151 | Rho guanine nucleotide exchange factor (GEF) 5                        | <i>Arhgef5</i>           | -2.84 | 0.000229 | 6     |
| 152 | Quaking                                                               | <i>Qk</i>                | -2.83 | 0.000275 | 17    |
| 153 | Pseudouridine synthase 3                                              | <i>Pus3</i>              | -2.82 | 0.000615 | 9     |
| 154 | Glucuronyl C5-epimerase                                               | <i>Glce</i>              | -2.82 | 0.000128 | 9     |
| 155 | Coiled-coil domain containing 80                                      | <i>Ccdc80</i>            | -2.79 | 0.000439 | 16    |
| 156 | NADH dehydrogenase (ubiquinone) 1 alpha subcomplex, assembly factor 4 | <i>Ndufaf4</i>           | -2.79 | 0.000078 | 4     |
| 157 | Oxidative stress induced growth inhibitor family member 2             | <i>Osgin2</i>            | -2.77 | 0.000194 | 4     |
| 158 | Glutamic pyruvate transaminase (alanine aminotransferase) 2           | <i>Gpt2</i>              | -2.73 | 0.000446 | 8     |
| 159 | Predicted gene 13139                                                  | <i>Gm13139</i>           | -2.71 | 0.000056 | 4     |
| 160 | Phosphoserine phosphatase                                             | <i>PspH</i>              | -2.71 | 0.000042 | 5     |
| 161 | Zinc finger protein 703                                               | <i>Zfp703</i>            | -2.67 | 0.000584 | 8     |
| 162 | 4-aminobutyrate aminotransferase                                      | <i>Abat</i>              | -2.66 | 0.000598 | 16    |
| 163 | Insulin-like growth factor binding protein 3                          | <i>Igfbp3</i>            | -2.64 | 0.000186 | 11    |
| 164 | Zinc and ring finger 1                                                | <i>Znrf1</i>             | -2.61 | 0.000407 | 8     |
| 165 | Cathepsin Z                                                           | <i>Ctsz</i>              | -2.58 | 0.000019 | 2     |
| 166 | RAB20, member RAS oncogene family                                     | <i>Rab20</i>             | -2.57 | 0.000353 | 8     |
| 167 | STEAP family member 4                                                 | <i>Steap4</i>            | -2.56 | 0.000055 | 5     |
| 168 | Kruppel-like factor 9                                                 | <i>Klf9</i>              | -2.56 | 0.000110 | 19    |
| 169 | Procollagen lysine, 2-oxoglutarate 5-dioxygenase 2                    | <i>Plod2</i>             | -2.56 | 0.000621 | 9     |
| 170 | Ribosomal protein L5 /// ribosomal protein L5, pseudogene 2           | <i>Rpl5 /// Rpl5-ps2</i> | -2.51 | 0.000044 | 5///2 |
| 171 | Spla/ryanodine receptor domain and SOCS box containing 4              | <i>Spsb4</i>             | -2.51 | 0.000638 | 9     |
| 172 | H19, imprinted maternally expressed transcript /// microRNA 675       | <i>H19 /// Mir675</i>    | -2.51 | 0.000265 | 7///7 |
| 173 | TGFB-induced factor homeobox 1                                        | <i>Tgif1</i>             | -2.48 | 0.000064 | 17    |
| 174 | YTH domain family 2                                                   | <i>Ythdf2</i>            | -2.47 | 0.000653 | 4     |
| 175 | Ring finger protein 11                                                | <i>Rnf11</i>             | -2.45 | 0.000859 | 4     |
| 176 | Influenza virus NS1A binding protein                                  | <i>Ivns1abp</i>          | -2.43 | 0.000653 | 1     |
| 177 | DNA segment, Chr 16, ERATO Doi 472, expressed                         | <i>D16Ert472e</i>        | -2.42 | 0.000368 | 16    |
| 178 | Fin bud initiation factor homolog (zebrafish)                         | <i>Fibin</i>             | -2.42 | 0.000812 | 2     |
| 179 | Zinc finger protein 566                                               | <i>Zfp566</i>            | -2.41 | 0.000859 | 7     |
| 180 | Nuclear protein transcription regulator 1                             | <i>Nupr1</i>             | -2.38 | 0.000325 | 7     |
| 181 | Nicotinamide N-methyltransferase                                      | <i>Nnmt</i>              | -2.36 | 0.000677 | 9     |
| 182 | TEA domain family member 2                                            | <i>Tead2</i>             | -2.35 | 0.000325 | 7     |
| 183 | Pecanex-like 4 (Drosophila)                                           | <i>Pcnx14</i>            | -2.32 | 0.000514 | 12    |
| 184 | CCAAT/enhancer binding protein (C/EBP), beta                          | <i>Cebpb</i>             | -2.32 | 0.000534 | 2     |
| 185 | Cytochrome c oxidase assembly factor 7                                | <i>Coa7</i>              | -2.32 | 0.000148 | 4     |
| 186 | Caspase 7                                                             | <i>Casp7</i>             | -2.31 | 0.000407 | 19    |

|     |                                                                                                                                                                              |                                               |       |          |    |
|-----|------------------------------------------------------------------------------------------------------------------------------------------------------------------------------|-----------------------------------------------|-------|----------|----|
| 187 | SR-related CTD-associated factor 8                                                                                                                                           | <i>Scaf8</i>                                  | -2.31 | 0.000786 | 17 |
| 188 | Latent transforming growth factor beta binding protein 3                                                                                                                     | <i>Ltbp3</i>                                  | -2.30 | 0.000517 | 19 |
| 189 | C-type lectin domain family 4, member e                                                                                                                                      | <i>Clec4e</i>                                 | -2.29 | 0.000454 | 6  |
| 190 | Isovaleryl coenzyme A dehydrogenase                                                                                                                                          | <i>Ivd</i>                                    | -2.29 | 0.000360 | 2  |
| 191 | Palladin, cytoskeletal associated protein                                                                                                                                    | <i>Palld</i>                                  | -2.29 | 0.000066 | 8  |
| 192 | Disabled 2 interacting protein                                                                                                                                               | <i>Dab2ip</i>                                 | -2.28 | 0.000136 | 2  |
| 193 | Sorting nexin 18                                                                                                                                                             | <i>Snx18</i>                                  | -2.28 | 0.000435 | 13 |
| 194 | Zinc finger protein 639                                                                                                                                                      | <i>Zfp639</i>                                 | -2.28 | 0.000083 | 3  |
| 195 | Camello-like 1                                                                                                                                                               | <i>Cml1</i>                                   | -2.28 | 0.000714 | 6  |
| 196 | Mitogen-activated protein kinase 12                                                                                                                                          | <i>Mapk12</i>                                 | -2.27 | 0.000285 | 15 |
| 197 | Fibrillin 1                                                                                                                                                                  | <i>Fbn1</i>                                   | -2.26 | 0.000126 | 2  |
| 198 | Complement component 2 (within H-2S)                                                                                                                                         | <i>C2</i>                                     | -2.26 | 0.000229 | 17 |
| 199 | Rho GDP dissociation inhibitor (GDI) gamma                                                                                                                                   | <i>Arhgdig</i>                                | -2.26 | 0.000311 | 17 |
| 200 | Phospholipase A2, group XV                                                                                                                                                   | <i>Pla2g15</i>                                | -2.25 | 0.000248 | 8  |
| 201 | Solute carrier family 3 (activators of dibasic and neutral amino acid transport), member 2                                                                                   | <i>Slc3a2</i>                                 | -2.25 | 0.000027 | 19 |
| 202 | Post-GPI attachment to proteins 2                                                                                                                                            | <i>Pgap2</i>                                  | -2.24 | 0.000125 | 7  |
| 203 | ATP5S-like                                                                                                                                                                   | <i>Atp5sl</i>                                 | -2.23 | 0.000378 | 7  |
| 204 | Apurinic/apyrimidinic endonuclease 1                                                                                                                                         | <i>Apex1</i>                                  | -2.23 | 0.000505 | 14 |
| 205 | General transcription factor IIA, 1-like                                                                                                                                     | <i>Gtf2a1l</i>                                | -2.23 | 0.000826 | 17 |
| 206 | Collagen, type V, alpha 1                                                                                                                                                    | <i>Col5a1</i>                                 | -2.22 | 0.000316 | 2  |
| 207 | FK506 binding protein-like                                                                                                                                                   | <i>Fkbp1</i>                                  | -2.21 | 0.000901 | 17 |
| 208 | Myelocytomatosis oncogene                                                                                                                                                    | <i>Myc</i>                                    | -2.21 | 0.000310 | 15 |
| 209 | Golgi associated, gamma adaptin ear containing, ARF binding protein 2                                                                                                        | <i>Gga2</i>                                   | -2.21 | 0.000107 | 7  |
| 210 | Phosphatidylinositol glycan anchor biosynthesis, class K                                                                                                                     | <i>Pigk</i>                                   | -2.20 | 0.000355 | 3  |
| 211 | Histocompatibility 2, Q region locus 4 /// histocompatibility 2, Q region locus 6 /// histocompatibility 2, Q region locus 8 /// histocompatibility 2, Q region locus 6-like | <i>H2-Q4 /// H2-Q6 /// H2-Q8 /// LOC68395</i> | -2.20 | 0.000538 | 17 |
| 212 | Interferon (alpha and beta) receptor 2                                                                                                                                       | <i>Ifnar2</i>                                 | -2.19 | 0.000060 | 16 |
| 213 | Chemokine (C-C motif) ligand 25                                                                                                                                              | <i>Ccl25</i>                                  | -2.18 | 0.000288 | 8  |
| 214 | SET domain, bifurcated 1                                                                                                                                                     | <i>Setdb1</i>                                 | -2.18 | 0.000709 | 3  |
| 215 | Expressed sequence AI837181                                                                                                                                                  | <i>AI837181</i>                               | -2.18 | 0.000287 | 19 |
| 216 | Protein phosphatase 1, regulatory (inhibitor) subunit 14c                                                                                                                    | <i>Ppp1r14c</i>                               | -2.18 | 0.000539 | 10 |
| 217 | SKI-like                                                                                                                                                                     | <i>Skil</i>                                   | -2.17 | 0.000548 | 3  |
| 218 | WD repeat domain 20                                                                                                                                                          | <i>Wdr20</i>                                  | -2.13 | 0.000463 | 12 |
| 219 | 3-phosphoglycerate dehydrogenase                                                                                                                                             | <i>Phgdh</i>                                  | -2.12 | 0.000597 | 3  |
| 220 | Diacylglycerol O-acyltransferase 2                                                                                                                                           | <i>Dgat2</i>                                  | -2.11 | 0.000812 | 7  |
| 221 | Cleavage stimulation factor, 3' pre-RNA subunit 2, tau                                                                                                                       | <i>Cstf2t</i>                                 | -2.10 | 0.000186 | 19 |
| 222 | Transmembrane protein 11                                                                                                                                                     | <i>Tmem11</i>                                 | -2.09 | 0.000470 | 11 |
| 223 | RAS p21 protein activator 3                                                                                                                                                  | <i>Rasa3</i>                                  | -2.03 | 0.000202 | 8  |
| 224 | Mannan-binding lectin serine peptidase 1                                                                                                                                     | <i>Masp1</i>                                  | -2.00 | 0.000460 | 16 |

|     |                                                                                                   |                                                |       |          |    |
|-----|---------------------------------------------------------------------------------------------------|------------------------------------------------|-------|----------|----|
| 225 | Leptin receptor overlapping transcript-like 1                                                     | <i>Leprotl1</i>                                | -2.00 | 0.000913 | 8  |
| 226 | Solute carrier family 39 (zinc transporter), member 14                                            | <i>Slc39a14</i>                                | -1.99 | 0.000730 | 14 |
| 227 | Heat shock protein 5                                                                              | <i>Hspa5</i>                                   | -1.99 | 0.000616 | 2  |
| 228 | Bicaudal D homolog 1 (Drosophila)                                                                 | <i>Bicd1</i>                                   | -1.98 | 0.000837 | 6  |
| 229 | Iroquois related homeobox 1 (Drosophila)                                                          | <i>Irx1</i>                                    | -1.97 | 0.000208 | 13 |
| 230 | Dual specificity phosphatase 16                                                                   | <i>Dusp16</i>                                  | -1.95 | 0.000210 | 6  |
| 231 | Interleukin 4 receptor, alpha                                                                     | <i>Il4ra</i>                                   | -1.95 | 0.000329 | 7  |
| 232 | Queuine tRNA-ribosyltransferase 1                                                                 | <i>Qtrt1</i>                                   | -1.95 | 0.000341 | 9  |
| 233 | Rosbin, round spermatid basic protein 1                                                           | <i>Rsbn1</i>                                   | -1.92 | 0.000737 | 3  |
| 234 | Chloride channel 5                                                                                | <i>Clcn5</i>                                   | -1.88 | 0.000326 | X  |
| 235 | Cytotoxic T lymphocyte-associated protein 2 beta                                                  | <i>Ctla2b</i>                                  | -1.86 | 0.000702 | 13 |
| 236 | Methylenetetrahydrofolate dehydrogenase (NAD+ dependent), methenyltetrahydrofolate cyclohydrolase | <i>Mthfd2</i>                                  | -1.86 | 0.000980 | 6  |
| 237 | Complement component 1, q subcomponent binding protein                                            | <i>C1qbp</i>                                   | -1.83 | 0.000287 | 11 |
| 238 | Carbohydrate (N-acetylgalactosamine 4-0) sulfotransferase 14                                      | <i>Chst14</i>                                  | -1.82 | 0.000228 | 2  |
| 239 | Peroxiredoxin 5                                                                                   | <i>Prdx5</i>                                   | -1.78 | 0.000389 | 19 |
| 240 | Zinc finger protein 777                                                                           | <i>Zfp777</i>                                  | -1.77 | 0.000660 | 6  |
| 241 | Feminization 1 homolog b (C. Elegans)                                                             | <i>Fem1b</i>                                   | -1.76 | 0.000799 | 9  |
| 242 | Carnitine palmitoyltransferase 2                                                                  | <i>Cpt2</i>                                    | -1.76 | 0.000686 | 4  |
| 243 | Seven in absentia 2                                                                               | <i>Siah2</i>                                   | -1.76 | 0.000702 | 3  |
| 244 | RB1-inducible coiled-coil 1                                                                       | <i>Rb1cc1</i>                                  | -1.74 | 0.000311 | 1  |
| 245 | Centrosomal protein 68                                                                            | <i>Cep68</i>                                   | -1.71 | 0.000653 | 11 |
| 246 | Ariadne homolog 2 (Drosophila)                                                                    | <i>Arih2</i>                                   | -1.71 | 0.000540 | 9  |
| 247 | Ring finger protein 113A1                                                                         | <i>Rnf113a1</i>                                | -1.67 | 0.000968 | X  |
| 248 | Lysosomal-associated membrane protein 2                                                           | <i>Lamp2</i>                                   | -1.66 | 0.000473 | X  |
| 249 | 60S ribosomal protein L23-like /// 60S ribosomal protein L23-like /// ribosomal protein L23       | <i>LOC100044627 /// LOC100862455 /// Rpl23</i> | -1.57 | 0.000980 | 17 |

**Table S7. The Gene Set Enrichment analysis**

| Pathway                                                                    | Source of data | Down-regulated genes |          |                                                                                                                                     |
|----------------------------------------------------------------------------|----------------|----------------------|----------|-------------------------------------------------------------------------------------------------------------------------------------|
|                                                                            |                | P. val               | Q.val    | Genes involved                                                                                                                      |
| Extracellular matrix organization                                          | Reactome       | 3.02E-07             | 9.42E-05 | <i>Adamts5; Try5; Ltbp3; Jam2; Jam3; Efemp1; Try4; Mmp13; Plod2; Tgfb2; Itga6; Fbn1; Col5a2; Nid2; Col5a1; Col4a2; Col4a1; Mmp3</i> |
| Protein digestion and absorption - Mus musculus (mouse)                    | KEGG           | 4.25E-05             | 6.63E-03 | <i>Try5; Try4; Col5a2; Slc3a2; Col5a1; Atp1a3; Col4a2; Col4a1</i>                                                                   |
| Activation of C3 and C5                                                    | Reactome       | 1.97E-03             | 3.08E-02 | <i>C3; C2</i>                                                                                                                       |
| Activation of Matrix Metalloproteinases                                    | Reactome       | 2.04E-03             | 3.08E-02 | <i>Try5; Try4; Mmp3; Mmp13</i>                                                                                                      |
| Acyl-coa hydrolysis                                                        | Mousecyc       | 4.35E-04             | 1.36E-02 | <i>Acot4; Acot2; Acot1</i>                                                                                                          |
| Allograft rejection - Mus musculus (mouse)                                 | KEGG           | 8.83E-03             | 5.74E-02 | <i>H2-Q4; H2-K1; H2-D1; H2-Q6</i>                                                                                                   |
| Amino acid synthesis and interconversion (transamination)                  | Reactome       | 9.38E-04             | 2.66E-02 | <i>Aldh18a1; Gpt2; Phgdh; PspH</i>                                                                                                  |
| Antigen Presentation: Folding, assembly and peptide loading of class I MHC | Reactome       | 1.29E-04             | 1.01E-02 | <i>H2-Q4; H2-K1; H2-D1; H2-Q6; Hspa5</i>                                                                                            |
| Antigen processing and presentation - Mus musculus (mouse)                 | KEGG           | 1.35E-03             | 2.73E-02 | <i>H2-K1; H2-D1; Hspa5; H2-Q4; H2-Q6; Ifi30</i>                                                                                     |
| Antigen processing-Cross presentation                                      | Reactome       | 2.24E-03             | 3.08E-02 | <i>H2-Q4; H2-K1; H2-D1; H2-Q6</i>                                                                                                   |
| Assembly of collagen fibrils and other multimeric structures               | Reactome       | 1.40E-03             | 2.73E-02 | <i>Mmp3; Col4a2; Itga6; Col4a1; Mmp13</i>                                                                                           |
| Basigin interactions                                                       | Reactome       | 5.23E-03             | 4.41E-02 | <i>Slc16a1; Slc3a2; Itga6</i>                                                                                                       |
| Cell adhesion molecules (cams) - Mus musculus (mouse)                      | KEGG           | 2.27E-03             | 3.08E-02 | <i>H2-K1; H2-D1; Cdh15; Jam2; Jam3; H2-Q4; H2-Q6; Itga6</i>                                                                         |
| Cell surface interactions at the vascular wall                             | Reactome       | 7.33E-03             | 5.08E-02 | <i>Cxadr; Jam2; Sirpa; Jam3; Slc3a2; Itga6; Slc16a1</i>                                                                             |
| Cellular senescence - Mus musculus (mouse)                                 | KEGG           | 4.32E-03             | 4.22E-02 | <i>H2-K1; H2-D1; H2-Q4; H2-Q6; Tgfb2; Igfbp3; Mapk12; Myc</i>                                                                       |
| Class I MHC mediated antigen processing & presentation                     | Reactome       | 6.43E-03             | 4.78E-02 | <i>H2-K1; H2-D1; Znrfl1; Hspa5; Siah2; H2-Q4; H2-Q6; Arih2; Fbxo32; Spsb1; Spsb4</i>                                                |
| Collagen biosynthesis and modifying enzymes                                | Reactome       | 2.49E-03             | 3.11E-02 | <i>Col5a2; Plod2; Col5a1; Col4a2; Col4a1</i>                                                                                        |
| Collagen chain trimerization                                               | Reactome       | 3.22E-03             | 3.35E-02 | <i>Col5a2; Col5a1; Col4a2; Col4a1</i>                                                                                               |
| Collagen degradation                                                       | Reactome       | 3.22E-03             | 3.35E-02 | <i>Try5; Try4; Mmp3; Mmp13</i>                                                                                                      |
| Collagen formation                                                         | Reactome       | 9.03E-05             | 9.40E-03 | <i>Mmp13; Plod2; Itga6; Col5a2; Col5a1; Col4a2; Col4a1; Mmp3</i>                                                                    |
| Complement Activation, Classical Pathway                                   | Wikipathways   | 1.68E-03             | 2.92E-02 | <i>C3; C2; Masp1</i>                                                                                                                |

|                                                                          |              |          |          |                                                                                                                                                                                                                                                    |
|--------------------------------------------------------------------------|--------------|----------|----------|----------------------------------------------------------------------------------------------------------------------------------------------------------------------------------------------------------------------------------------------------|
| Complement and Coagulation Cascades                                      | Wikipathways | 2.27E-04 | 1.01E-02 | <i>Bdkrb1; Cd59a; Masp1; Plat; C3; C2</i>                                                                                                                                                                                                          |
| Complement and coagulation cascades - Mus musculus (mouse)               | KEGG         | 2.59E-04 | 1.01E-02 | <i>Bdkrb1; Cd59a; Masp1; Plat; Clu; C3; C2</i>                                                                                                                                                                                                     |
| Complement cascade                                                       | Reactome     | 5.71E-03 | 4.69E-02 | <i>C3; Clu; Cd59a; Masp1; C2</i>                                                                                                                                                                                                                   |
| ECM-receptor interaction - Mus musculus (mouse)                          | KEGG         | 6.66E-03 | 4.83E-02 | <i>Npnt; Itga6; Col4a2; Col4a1; Thbs3</i>                                                                                                                                                                                                          |
| Elastic fibre formation                                                  | Reactome     | 1.49E-03 | 2.74E-02 | <i>Efemp1; Tgfb2; Ltbp3; Fbn1</i>                                                                                                                                                                                                                  |
| Endosomal/Vacuolar pathway                                               | Reactome     | 1.99E-04 | 1.01E-02 | <i>H2-Q4; H2-K1; H2-D1; H2-Q6</i>                                                                                                                                                                                                                  |
| Exercise-induced Circadian Regulation                                    | Wikipathways | 5.17E-03 | 4.41E-02 | <i>Cebpb; Qk; Stbd1; Klf9</i>                                                                                                                                                                                                                      |
| Ferroptosis - Mus musculus (mouse)                                       | KEGG         | 2.47E-03 | 3.11E-02 | <i>Slc3a2; Cp; Slc40a1; Slc39a14</i>                                                                                                                                                                                                               |
| Focal Adhesion-PI3K-Akt-mtor-signaling pathway                           | Wikipathways | 2.22E-03 | 3.08E-02 | <i>Ifnar2; Osmr; Il4ra; Thbs3; Itga6; Col5a2; Rps6; Col5a1; Col4a2; Col4a1; Fgf7; Lpar4</i>                                                                                                                                                        |
| Graft-versus-host disease - Mus musculus (mouse)                         | KEGG         | 9.96E-03 | 5.85E-02 | <i>H2-Q4; H2-K1; H2-D1; H2-Q6</i>                                                                                                                                                                                                                  |
| Hemostasis                                                               | Reactome     | 9.67E-03 | 5.85E-02 | <i>Cxadr; Tgfb2; Sirpa; Jam2; Jam3; Zfp2; Itga6; Plat; Slc3a2; Slc16a1; c1qbp; Lamp2; Srgn; Clu; Abhd6; Ttn</i>                                                                                                                                    |
| IL-17 signaling pathway - Mus musculus (mouse)                           | KEGG         | 3.19E-04 | 1.11E-02 | <i>Cebpb; Cxcl5; Mmp13; Lcn2; S100a8; Mapk12; Mmp3</i>                                                                                                                                                                                             |
| Immune System                                                            | Reactome     | 9.72E-03 | 5.85E-02 | <i>Il1rn; Znrfl; Sirpa; Try5; Try4; Masp1; Ifnar2; Clu; Prl7c1; Slc44a2; Arih2; Hspa5; Il4ra; Cd59a; Hp; Ctsf; Ctsz; Stbd1; Mapk12; C3; C2; Spsb1; Spsb4; Slpi; Il13ra2; H2-D1; H2-Q4; H2-Q6; H2-K1; Osmr; S100a8; Fbxo32; Cxadr; Siah2; Lamp2</i> |
| Immunoregulatory interactions between a Lymphoid and a non-Lymphoid cell | Reactome     | 3.08E-03 | 3.35E-02 | <i>Cxadr; H2-K1; H2-D1; H2-Q4; H2-Q6; C3</i>                                                                                                                                                                                                       |
| Innate Immune System                                                     | Reactome     |          |          |                                                                                                                                                                                                                                                    |
| Integrin cell surface interactions                                       | Reactome     | 2.48E-04 | 1.01E-02 | <i>Jam2; Jam3; Itga6; Fbn1; Col4a2; Col4a1</i>                                                                                                                                                                                                     |
| Lysosome - Mus musculus (mouse)                                          | KEGG         | 8.72E-03 | 5.74E-02 | <i>Pla2g15; Ctsf; Ctsz; Gga2; Lamp2; Sort1</i>                                                                                                                                                                                                     |
| Metal ion SLC transporters                                               | Reactome     | 3.16E-03 | 3.35E-02 | <i>Cp; Slc40a1; Slc39a14</i>                                                                                                                                                                                                                       |
| Molecules associated with elastic fibres                                 | Reactome     | 9.61E-03 | 5.85E-02 | <i>Efemp1; Tgfb2; Ltbp3</i>                                                                                                                                                                                                                        |
| Neutrophil degranulation                                                 | Reactome     | 5.97E-03 | 4.69E-02 | <i>Slpi; Slc44a2; H2-D1; Sirpa; Try5; H2-Q4; Hp; H2-Q6; Cd59a; H2-K1; Ctsz; Lamp2; Stbd1; Try4; C3; S100a8</i>                                                                                                                                     |
| Pertussis - Mus musculus (mouse)                                         | KEGG         | 4.59E-03 | 4.34E-02 | <i>C3; Casp7; Cxcl5; Mapk12; C2</i>                                                                                                                                                                                                                |

|                                                                                 |                       |               |              |                                                                                                                          |
|---------------------------------------------------------------------------------|-----------------------|---------------|--------------|--------------------------------------------------------------------------------------------------------------------------|
| PI3K-Akt signaling pathway - Mus musculus (mouse)                               | KEGG                  | 5.12E-03      | 4.41E-02     | <i>Pck2; Il4ra; Thbs3; Itga6; Ifnar2; Rps6; Osmr; Col4a2; Col4a1; Fgf7; Myc; Lpar4</i>                                   |
| Post-translational protein phosphorylation                                      | Reactome              | 8.08E-03      | 5.48E-02     | <i>Fbn1; Igfbp3; Igfbp5; C3; Cp; Tmem132a</i>                                                                            |
| Serine biosynthesis                                                             | Mousecyc              | 1.20E-03      | 2.70E-02     | <i>Phgdh; Psph</i>                                                                                                       |
| Serine biosynthesis                                                             | Reactome              | 6.84E-03      | 4.85E-02     | <i>Phgdh; Psph</i>                                                                                                       |
| Signaling by PDGF                                                               | Reactome              | 6.40E-03      | 4.78E-02     | <i>Col4a2; Thbs3; Col4a1; Plat</i>                                                                                       |
| Signaling pathways regulating pluripotency of stem cells - Mus musculus (mouse) | KEGG                  | 3.50E-03      | 3.53E-02     | <i>Fzd4; Fzd6; Esrrb; Skil; Mapk12; Myc; Setdb1</i>                                                                      |
| Superpathway of serine and glycine biosynthesis I                               | Mousecyc              | 2.93E-03      | 3.35E-02     | <i>Phgdh; Psph</i>                                                                                                       |
| TNF signaling pathway - Mus musculus (mouse)                                    | KEGG                  | 4.92E-03      | 4.41E-02     | <i>Casp7; Cebpb; Dab2ip; Mapk12; Mmp3; Bcl3</i>                                                                          |
| Transcriptional misregulation in cancer - Mus musculus (mouse)                  | KEGG                  | 1.21E-03      | 2.70E-02     | <i>Cebpb; Nupr1; Plat; Nfkbiz; Igfbp3; Pax7; Mmp3; Myc; Pax8</i>                                                         |
| Transport of bile salts and organic acids, metal ions and amine compounds       | Reactome              | 1.05E-03      | 2.70E-02     | <i>Slc44a2; Slc40a1; Slc39a14; Slc16a1; Slc6a9; Cp</i>                                                                   |
| Viral myocarditis - Mus musculus (mouse)                                        | KEGG                  | 6.01E-03      | 4.69E-02     | <i>H2-Q4; H2-K1; H2-D1; H2-Q6; Cxadr</i>                                                                                 |
| <b>Pathway</b>                                                                  | <b>Source of data</b> | <b>P. val</b> | <b>Q.val</b> | <b>Up-regulated genes</b>                                                                                                |
|                                                                                 |                       |               |              | <b>Genes involved</b>                                                                                                    |
| APC/C-mediated degradation of cell cycle proteins                               | Reactome              | 3,06E-03      | 3,60E-02     | <i>Pttg1; Cdkn1a; Bub1b</i>                                                                                              |
| Cell Cycle                                                                      | Reactome              | 4,47E-07      | 5,17E-05     | <i>Hmmr; Ncaph2; Lmnb1; Bub1b; Ccnd1; Tubb4b; Cdkn1a; Gtse1; Ska1; Dna2; Prim1; Tuba4a; Pttg1; Phlda1; Birc5; Kif20a</i> |
| Cell cycle                                                                      | Wikipathways          | 3,12E-03      | 3,60E-02     | <i>Pttg1; Cdkn1a; Hdac5; Bub1b</i>                                                                                       |
| Cell Cycle Checkpoints                                                          | Reactome              | 5,84E-03      | 5,19E-02     | <i>Dna2; Bub1b; Birc5; Gtse1; Ska1; Cdkn1a</i>                                                                           |
| Cell Cycle, Mitotic                                                             | Reactome              | 7,89E-08      | 1,82E-05     | <i>Hmmr; Ncaph2; Lmnb1; Bub1b; Ccnd1; Tubb4b; Cdkn1a; Gtse1; Ska1; Dna2; Prim1; Tuba4a; Pttg1; Phlda1; Birc5; Kif20a</i> |
| G1 to S cell cycle control                                                      | Wikipathways          | 8,72E-03      | 6,10E-02     | <i>Ccnd1; Cdkn1a; Prim1</i>                                                                                              |
| G1/S Transition                                                                 | Reactome              | 8,72E-03      | 6,10E-02     | <i>Ccnd1; Cdkn1a; Prim1</i>                                                                                              |
| G2/M Transition                                                                 | Reactome              | 2,10E-04      | 1,32E-02     | <i>Hmmr; Tubb4b; Cdkn1a; Gtse1; Tuba4a; Phlda1</i>                                                                       |
| Graft-versus-host disease - Mus musculus (mouse)                                | KEGG                  |               |              |                                                                                                                          |
| Hemostasis                                                                      | Reactome              |               |              |                                                                                                                          |
| Hepatitis B - Mus musculus (mouse)                                              | KEGG                  | 4,72E-04      | 1,56E-02     | <i>Nfatc1; Ccnd1; Birc5; Creb3l2; Cdkn1a; Apaf1</i>                                                                      |
| Hippo signaling pathway - Mus musculus (mouse)                                  | KEGG                  | 6,98E-04      | 2,02E-02     | <i>Itgb2; Ccnd1; Birc5; Sox2; Frmd6; Wwc1</i>                                                                            |
| Human T-cell leukemia virus 1 infection - Mus musculus (mouse)                  | KEGG                  | 1,38E-03      | 2,75E-02     | <i>Nfatc1; Itgb2; Bub1b; Ccnd1; Cdkn1a; Creb3l2; Pttg1</i>                                                               |

|                                                           |              |          |          |                                                                                                                       |
|-----------------------------------------------------------|--------------|----------|----------|-----------------------------------------------------------------------------------------------------------------------|
| Innate Immune System                                      | Reactome     | 2,97E-03 | 3,60E-02 | <i>Nfatc1; Itgb2; Glipr1; Trappc1; c3ar1; Vnn1; Fgl2; Frk; Mettl7a1; Dnm1; Tubb4b; Baiap2; Mettl7a2; Dusp6; Apaf1</i> |
| Lagging Strand Synthesis                                  | Reactome     | 9,19E-03 | 6,25E-02 | <i>Dna2; Prim1</i>                                                                                                    |
| Legionellosis - Mus musculus (mouse)                      | KEGG         | 7,23E-03 | 5,97E-02 | <i>Sar1a; Itgb2; Apaf1</i>                                                                                            |
| M Phase                                                   | Reactome     | 4,06E-04 | 1,56E-02 | <i>Ncaph2; Lmn1b; Bub1b; Tubb4b; Birc5; Ska1; Pttg1; Tuba4a; Kif20a</i>                                               |
| Metabolism of carbohydrates                               | Reactome     | 7,98E-03 | 6,10E-02 | <i>Hmmr; Chst11; Ndst1; Hk1; Pfkf; Slc25a10</i>                                                                       |
| Mitotic G2-G2/M phases                                    | Reactome     | 2,29E-04 | 1,32E-02 | <i>Hmmr; Tubb4b; Cdkn1a; Gtse1; Tuba4a; Phlda1</i>                                                                    |
| Mitotic Prometaphase                                      | Reactome     | 8,69E-03 | 6,10E-02 | <i>Ska1; Tuba4a; Birc5; Tubb4b; Bub1b</i>                                                                             |
| Molecules associated with elastic fibres                  | Reactome     |          |          |                                                                                                                       |
| Neutrophil degranulation                                  | Reactome     | 1,55E-03 | 2,75E-02 | <i>Itgb2; Glipr1; Trappc1; c3ar1; Vnn1; Fgl2; Frk; Mettl7a2; Tubb4b; Mettl7a1; Apaf1</i>                              |
| Oxidative Damage                                          | Wikipathways | 2,85E-03 | 3,60E-02 | <i>C3ar1; Cdkn1a; Apaf1</i>                                                                                           |
| P53 signaling                                             | Wikipathways | 1,26E-03 | 2,75E-02 | <i>Ccnd1; Cdkn1a; Gtse1; Apaf1</i>                                                                                    |
| P53 signaling pathway - Mus musculus (mouse)              | KEGG         | 1,48E-03 | 2,75E-02 | <i>Ccnd1; Cdkn1a; Gtse1; Apaf1</i>                                                                                    |
| Parkinsons Disease Pathway                                | Wikipathways | 2,29E-03 | 3,60E-02 | <i>Lrrk2; Apaf1; Ube2g2</i>                                                                                           |
| Podnet- protein-protein interactions in the podocyte      | Wikipathways | 3,30E-04 | 1,53E-02 | <i>Sema3a; Birc5; Ccnd1; Wwc1; Myh9; Khdrbs3; Dnm1; Baiap2; Cdkn1a</i>                                                |
| Primary Focal Segmental Glomerulosclerosis FSGS           | Wikipathways | 1,48E-03 | 2,75E-02 | <i>Cd80; Cdkn1a; Myh9; Dnm1</i>                                                                                       |
| Processive synthesis on the lagging strand                | Reactome     | 5,37E-03 | 5,09E-02 | <i>Dna2; Prim1</i>                                                                                                    |
| Regulation of mitotic cell cycle                          | Reactome     | 3,06E-03 | 3,60E-02 | <i>Pttg1; Cdkn1a; Bub1b</i>                                                                                           |
| Removal of the Flap Intermediate                          | Reactome     | 4,72E-03 | 5,04E-02 | <i>Dna2; Prim1</i>                                                                                                    |
| S Phase                                                   | Reactome     | 5,51E-03 | 5,09E-02 | <i>Ccnd1; Cdkn1a; Dna2; Prim1</i>                                                                                     |
| SCF(Skp2)-mediated degradation of p27/p21                 | Reactome     | 6,06E-03 | 5,19E-02 | <i>Ccnd1;</i>                                                                                                         |
| Signaling by Non-Receptor Tyrosine Kinases                | Reactome     | 5,02E-03 | 5,04E-02 | <i>Ccnd1; Khdrbs3; Lrrk2</i>                                                                                          |
| Signaling by PTK6                                         | Reactome     | 5,02E-03 | 5,04E-02 | <i>Ccnd1; Khdrbs3; Lrrk2</i>                                                                                          |
| Signaling by Rho gtpases                                  | Reactome     | 8,11E-03 | 6,10E-02 | <i>Bub1b; Birc5; Myh9; Ska1; Rhoj; Baiap2; Arhgap18; Iqgap3</i>                                                       |
| The role of GTSE1 in G2/M progression after G2 checkpoint | Reactome     | 2,52E-03 | 3,60E-02 | <i>Cdkn1a; Gtse1</i>                                                                                                  |

**Table S8. Table of contrasts (post-hoc tests) from comparison of invasiveness of JUN-3 sarcoma cells treated with Bindarit (Bind), Maraviroc (Marav) or their combination (Comb) compared to untreated control.** Beta= effect size – the difference between cell lines with respect to given evaluated measure. CI\_L and CI\_U= limits of 95% confidence intervals for the beta, based on Bias-Corrected and Accelerated (BCa) bootstrap simulations. p= raw p-value from permutational t-test. fdr\_p= p-value corrected by False Discovery Rate correction for multiple comparison. See methods for definition of the measures states and capacities.

| (e) Motility   | Beta | CI_L  | CI_U | p      | fdr_p  |
|----------------|------|-------|------|--------|--------|
| ctrl vs. bind  | 0.62 | 0.11  | 1.14 | 0.0396 | 0.0594 |
| ctrl vs. marav | 0.31 | -0.03 | 0.59 | 0.0730 | 0.0730 |
| ctrl vs.comb   | 0.48 | 1.10  | 1.67 | <0.001 | <0.001 |



**Table S9. Genes with significantly changed expression in JUN-2 compared to JUN-3**

| Gene.title                                                                                                                                                                                                              | Gene.symbol                                                                   | 2 <sup>^</sup> logFC | adj.p.val |
|-------------------------------------------------------------------------------------------------------------------------------------------------------------------------------------------------------------------------|-------------------------------------------------------------------------------|----------------------|-----------|
| Carbonic anhydrase 3                                                                                                                                                                                                    | <i>Car3</i>                                                                   | 676,834106           | 9,66e-13  |
| Ankyrin repeat and socs box-containing 5                                                                                                                                                                                | <i>Asb5</i>                                                                   | 337,553761           | 9,47e-12  |
| Protease, serine 23                                                                                                                                                                                                     | <i>Prss23</i>                                                                 | 304,523051           | 4,05e-11  |
| Myogenic factor 5                                                                                                                                                                                                       | <i>Myf5</i>                                                                   | 294,864431           | 2,69e-12  |
| Paternally expressed 3                                                                                                                                                                                                  | <i>Peg3</i>                                                                   | 263,804858           | 1,20e-12  |
| Inactive x specific transcripts                                                                                                                                                                                         | <i>Xist</i>                                                                   | 239,132145           | 5,47e-12  |
| Matrix metalloproteinase 13                                                                                                                                                                                             | <i>Mmp13</i>                                                                  | 233,791469           | 9,66e-13  |
| Zinc finger protein of the cerebellum 1                                                                                                                                                                                 | <i>Zic1</i>                                                                   | 173,50496            | 4,02e-12  |
| Serine (or cysteine) peptidase inhibitor, clade b, member 9g                                                                                                                                                            | <i>Serpinb9g</i>                                                              | 133,606134           | 5,46e-11  |
| Serum amyloid a 3                                                                                                                                                                                                       | <i>Saa3</i>                                                                   | 121,599123           | 1,63e-11  |
| Predicted gene 11397 /// serine (or cysteine) peptidase inhibitor, clade b, member 9e /// serine (or cysteine) peptidase inhibitor, clade b, member 9f /// serine (or cysteine) peptidase inhibitor, clade b, member 9g | <i>Gm11397</i> /// <i>serpinb9e</i> /// <i>serpinb9f</i> /// <i>serpinb9g</i> | 106,20245            | 1,65e-11  |
| Histocompatibility 2, class ii antigen a, beta 1                                                                                                                                                                        | <i>H2-ab1</i>                                                                 | 105,269376           | 4,05e-11  |
| Serine (or cysteine) peptidase inhibitor, clade b, member 2                                                                                                                                                             | <i>Serpinb2</i>                                                               | 104,947275           | 2,37e-10  |
| Ceruloplasmin                                                                                                                                                                                                           | <i>Cp</i>                                                                     | 104,150741           | 5,46e-11  |
| Armadillo repeat containing, x-linked 2                                                                                                                                                                                 | <i>Armxc2</i>                                                                 | 84,8545918           | 3,34e-09  |
| Insulin-like growth factor binding protein 5                                                                                                                                                                            | <i>Igfbp5</i>                                                                 | 75,8920762           | 1,62e-11  |
| Coagulation factor xiii, a1 subunit                                                                                                                                                                                     | <i>F13a1</i>                                                                  | 73,0606745           | 1,14e-09  |
| ATPase, Na <sup>+</sup> /K <sup>+</sup> transporting, beta 1 polypeptide                                                                                                                                                | <i>Atp1b1</i>                                                                 | 70,8491081           | 3,44e-10  |
| Paired-like homeodomain transcription factor 2                                                                                                                                                                          | <i>Pitx2</i>                                                                  | 68,7412513           | 6,17e-10  |
| Angiopoietin 4                                                                                                                                                                                                          | <i>Angpt4</i>                                                                 | 57,2838178           | 5,01e-11  |
| Four and a half lim domains 1                                                                                                                                                                                           | <i>Fhl1</i>                                                                   | 52,4798963           | 9,24e-11  |
| Cap, adenylate cyclase-associated protein, 2 (yeast)                                                                                                                                                                    | <i>Cap2</i>                                                                   | 46,1767584           | 2,06e-10  |
| Cell adhesion molecule 1                                                                                                                                                                                                | <i>Cadm1</i>                                                                  | 45,0476616           | 1,63e-11  |
| Trypsin 4 /// trypsin 5                                                                                                                                                                                                 | <i>Try4</i> /// <i>try5</i>                                                   | 41,3346923           | 2,05e-10  |
| Regulator of calcineurin 2                                                                                                                                                                                              | <i>Rcan2</i>                                                                  | 41,2553498           | 4,46e-11  |
| Cd28 antigen                                                                                                                                                                                                            | <i>Cd28</i>                                                                   | 40,6468893           | 4,03e-08  |
| Very low density lipoprotein receptor                                                                                                                                                                                   | <i>Vldlr</i>                                                                  | 38,7069108           | 9,73e-09  |
| Cysteine-rich c-terminal 1                                                                                                                                                                                              | <i>Crc1</i>                                                                   | 37,4506103           | 2,81e-11  |
| Sry (sex determining region y)-box 11                                                                                                                                                                                   | <i>Sox11</i>                                                                  | 35,3978927           | 5,67e-11  |
| Cholinergic receptor, nicotinic, alpha polypeptide 1                                                                                                                                                                    | <i>Chrna1</i>                                                                 | 35,2366587           | 1,79e-11  |

|                                                                               |                               |            |          |
|-------------------------------------------------------------------------------|-------------------------------|------------|----------|
| (muscle)                                                                      |                               |            |          |
| Acyl-coa thioesterase 1                                                       | <i>Acot1</i>                  | 34,8703717 | 1,88e-10 |
| Clusterin                                                                     | <i>Clu</i>                    | 34,5149922 | 1,63e-11 |
| Reticulon 2 (z-band associated protein)                                       | <i>Rtn2</i>                   | 34,2196428 | 1,67e-09 |
| Chloride channel calcium activated 2                                          | <i>Clca2</i>                  | 30,8436168 | 2,80e-10 |
| Chloride channel calcium activated 1 /// chloride channel calcium activated 2 | <i>Clca1</i> /// <i>clca2</i> | 30,432735  | 3,67e-09 |
| Cyclin-dependent kinase inhibitor 2a                                          | <i>Cdkn2a</i>                 | 30,4273865 | 1,23e-09 |
| Tetraspanin 6                                                                 | <i>Tspan6</i>                 | 29,6280931 | 4,77e-10 |
| Annexin a8                                                                    | <i>Anxa8</i>                  | 29,2637369 | 4,53e-11 |
| Glutamine repeat protein 1                                                    | <i>Glrp1</i>                  | 26,9530482 | 6,80e-11 |
| Synaptotagmin-like 2                                                          | <i>Sytl2</i>                  | 26,8613638 | 2,71e-10 |
| Thrombomodulin                                                                | <i>Thbd</i>                   | 25,3993111 | 4,83e-08 |
| Cytidine monophospho-n-acetylneuraminic acid hydroxylase                      | <i>Cmah</i>                   | 24,5808017 | 2,90e-09 |
| Cugbp, elav-like family member 4                                              | <i>Celf4</i>                  | 24,5515189 | 1,88e-10 |
| Cholinergic receptor, nicotinic, beta polypeptide 1                           | <i>Chrn1</i>                  | 24,5506363 | 3,63e-10 |
| (muscle)                                                                      |                               |            |          |
| Musculoskeletal, embryonic nuclear protein 1                                  | <i>Mustn1</i>                 | 24,2400543 | 4,91e-10 |
| Malignant t cell amplified sequence 2                                         | <i>Mcts2</i>                  | 23,1971414 | 1,38e-09 |
| Interleukin 13 receptor, alpha 2                                              | <i>Il13ra2</i>                | 22,5996109 | 4,71e-09 |
| Transmembrane protein 176a                                                    | <i>Tmem176a</i>               | 22,1960788 | 4,00e-09 |
| Speg complex locus                                                            | <i>Speg</i>                   | 21,7891441 | 9,46e-09 |
| Fibroblast growth factor 7                                                    | <i>Fgf7</i>                   | 21,7320426 | 8,55e-10 |
| Leucine rich repeat protein 1, neuronal                                       | <i>Lrrn1</i>                  | 21,1626076 | 4,27e-09 |
| Heparan sulfate 6-o-sulfotransferase 2                                        | <i>Hs6st2</i>                 | 21,0560197 | 5,76e-10 |
| Nestin                                                                        | <i>Nes</i>                    | 21,0290075 | 2,06e-10 |
| Transmembrane protein 176b                                                    | <i>Tmem176b</i>               | 20,7454349 | 2,71e-10 |
| Cystathionase (cystathionine gamma-lyase)                                     | <i>Cth</i>                    | 20,4368186 | 5,01e-08 |
| Insulin-like growth factor binding protein 2                                  | <i>Igfbp2</i>                 | 20,2420668 | 3,07e-09 |
| Atp-binding cassette, sub-family g (white), member 2                          | <i>Abcg2</i>                  | 20,2400042 | 2,50e-09 |
| Solute carrier family 24 (sodium/potassium/calcium exchanger), member 3       | <i>Slc24a3</i>                | 20,1144808 | 7,47e-09 |
| Receptor-associated protein of the synapse                                    | <i>Rapsn</i>                  | 19,9791182 | 9,24e-11 |
| Kelch-like 13                                                                 | <i>Klhl13</i>                 | 19,8810909 | 1,20e-09 |
| Integral membrane protein 2a                                                  | <i>Itm2a</i>                  | 19,4645515 | 2,18e-07 |
| Guanine deaminase                                                             | <i>Gda</i>                    | 19,4573961 | 1,66e-09 |

|                                                                                                                                                                                                         |                                                                                       |            |          |
|---------------------------------------------------------------------------------------------------------------------------------------------------------------------------------------------------------|---------------------------------------------------------------------------------------|------------|----------|
| Dachshund 2 (drosophila)                                                                                                                                                                                | <i>Dach2</i>                                                                          | 19,1745837 | 2,32e-07 |
| Epidermal growth factor-containing fibulin-like extracellular matrix protein 1                                                                                                                          | <i>Efemp1</i>                                                                         | 18,8296611 | 1,06e-09 |
| Trichohyalin                                                                                                                                                                                            | <i>Tchh</i>                                                                           | 18,6951815 | 5,14e-10 |
| Bradykinin receptor, beta 1                                                                                                                                                                             | <i>Bdkrb1</i>                                                                         | 18,5137027 | 5,01e-11 |
| Ankyrin repeat domain 1 (cardiac muscle)                                                                                                                                                                | <i>Ankrd1</i>                                                                         | 17,8995751 | 1,47e-10 |
| Family with sequence similarity 46, member c                                                                                                                                                            | <i>Fam46c</i>                                                                         | 17,4504879 | 2,83e-09 |
| Lysophosphatidic acid receptor 4                                                                                                                                                                        | <i>Lpar4</i>                                                                          | 17,224062  | 1,34e-07 |
| Titin                                                                                                                                                                                                   | <i>Ttn</i>                                                                            | 16,8926218 | 1,88e-10 |
| Chloride channel calcium activated 1                                                                                                                                                                    | <i>Clca1</i>                                                                          | 16,6305265 | 2,98e-09 |
| ATPase, Na <sup>+</sup> /K <sup>+</sup> transporting, alpha 2 polypeptide                                                                                                                               | <i>Atp1a2</i>                                                                         | 16,434359  | 6,22e-08 |
| Collagen, type IV, alpha 1                                                                                                                                                                              | <i>Col4a1</i>                                                                         | 16,412644  | 1,09e-09 |
| Collagen, type IV, alpha 2                                                                                                                                                                              | <i>Col4a2</i>                                                                         | 16,1873903 | 2,62e-09 |
| Cadherin 15                                                                                                                                                                                             | <i>Cdh15</i>                                                                          | 15,6326906 | 1,14e-09 |
| Family with sequence similarity 129, member A                                                                                                                                                           | <i>Fam129a</i>                                                                        | 15,300274  | 1,19e-08 |
| Selectin, platelet                                                                                                                                                                                      | <i>Selp</i>                                                                           | 15,0521292 | 3,54e-08 |
| Lactate dehydrogenase B                                                                                                                                                                                 | <i>Ldhb</i>                                                                           | 15,0094095 | 1,34e-08 |
| Beta-site APP-cleaving enzyme 2                                                                                                                                                                         | <i>Bace2</i>                                                                          | 14,9730405 | 3,14e-09 |
| Serine (or cysteine) peptidase inhibitor, clade B, member 6B                                                                                                                                            | <i>Serpinb6b</i>                                                                      | 14,820259  | 9,73e-09 |
| Haptoglobin                                                                                                                                                                                             | <i>Hp</i>                                                                             | 14,8194664 | 1,88e-10 |
| Retinoic acid early transcript 1, alpha /// retinoic acid early transcript beta /// retinoic acid early transcript gamma /// retinoic acid early transcript delta /// retinoic acid early transcript 1e | <i>Raet1a</i> /// <i>raet1b</i> /// <i>raet1c</i> /// <i>raet1d</i> /// <i>raet1e</i> | 14,4447039 | 9,46e-09 |
| Insulin-like growth factor 1                                                                                                                                                                            | <i>Igf1</i>                                                                           | 13,940747  | 1,06e-08 |
| Aldo-keto reductase family 1, member C18                                                                                                                                                                | <i>Akr1c18</i>                                                                        | 13,6754521 | 1,54e-09 |
| Immunoglobulin superfamily, DCC subclass, member 4                                                                                                                                                      | <i>Igdcc4</i>                                                                         | 13,6532624 | 4,25e-10 |
| Chemokine (C-X-C motif) ligand 5                                                                                                                                                                        | <i>Cxcl5</i>                                                                          | 13,283812  | 2,85e-09 |
| Death-associated protein kinase 2                                                                                                                                                                       | <i>Dapk2</i>                                                                          | 13,2594715 | 2,06e-10 |
| Neural proliferation, differentiation and control 1                                                                                                                                                     | <i>Npdc1</i>                                                                          | 13,0635648 | 5,14e-10 |
| Thrombospondin 1                                                                                                                                                                                        | <i>Thbs1</i>                                                                          | 12,8465296 | 1,48e-08 |
| Interleukin 1 receptor antagonist                                                                                                                                                                       | <i>Il1rn</i>                                                                          | 12,806676  | 1,08e-09 |
| Nuclear factor, interleukin 3, regulated                                                                                                                                                                | <i>Nfil3</i>                                                                          | 12,6842313 | 2,32e-10 |
| Pdz and LIM domain 3                                                                                                                                                                                    | <i>Pdlim3</i>                                                                         | 12,5886121 | 1,28e-10 |
| Myelin basic protein                                                                                                                                                                                    | <i>Mbp</i>                                                                            | 12,5475217 | 1,91e-08 |
| Nuclear paraspeckle assembly transcript 1 (non-                                                                                                                                                         | <i>Neat1</i>                                                                          | 12,5351803 | 5,28e-08 |

|                                                                                                               |                        |            |          |
|---------------------------------------------------------------------------------------------------------------|------------------------|------------|----------|
| protein coding)                                                                                               |                        |            |          |
| Cd302 antigen                                                                                                 | <i>Cd302</i>           | 12,3971077 | 4,98e-09 |
| Autophagy related 9b                                                                                          | <i>Atg9b</i>           | 12,2738403 | 1,92e-08 |
| Cdc42 effector protein (rho gtpase binding) 3                                                                 | <i>Cdc42ep3</i>        | 12,2446451 | 2,23e-09 |
| Cd200 antigen                                                                                                 | <i>Cd200</i>           | 12,2046065 | 9,72e-08 |
| S100 calcium binding protein a8 (calgranulin a)                                                               | <i>S100a8</i>          | 12,0700383 | 4,14e-09 |
| Histocompatibility 2, class ii, locus mb1 ///                                                                 | <i>H2-dmb1 ///</i> h2- | 11,9846237 | 3,34e-07 |
| histocompatibility 2, class ii, locus mb2 ///                                                                 | <i>dmb2 ///</i>        |            |          |
| uncharacterized loc102642102                                                                                  | <i>loc102642102</i>    |            |          |
| Nerve growth factor receptor (tnfr superfamily, member 16)                                                    | <i>Ngfr</i>            | 11,9220499 | 7,34e-09 |
| Lipocalin 2                                                                                                   | <i>Lcn2</i>            | 11,8533772 | 9,53e-09 |
| Gm2 ganglioside activator protein                                                                             | <i>Gm2a</i>            | 11,7880585 | 5,38e-09 |
| Late cornified envelope 1h                                                                                    | <i>Lce1h</i>           | 11,7880263 | 2,13e-07 |
| Protocadherin 18                                                                                              | <i>Pcdh18</i>          | 11,4467091 | 4,08e-09 |
| Annexin a3                                                                                                    | <i>Anxa3</i>           | 11,4289549 | 2,69e-09 |
| Acyl-coa thioesterase 1 /// acyl-coa thioesterase 2                                                           | <i>Acot1 ///</i> acot2 | 11,2970927 | 3,89e-09 |
| Serum deprivation response                                                                                    | <i>Sdpr</i>            | 11,236382  | 1,05e-08 |
| G0/g1 switch gene 2                                                                                           | <i>G0s2</i>            | 11,1398907 | 4,23e-10 |
| Mesothelin                                                                                                    | <i>Msln</i>            | 11,1255229 | 3,63e-10 |
| Cugbp, elav-like family member 2                                                                              | <i>Celf2</i>           | 11,1164678 | 1,19e-08 |
| Starch binding domain 1                                                                                       | <i>Stbd1</i>           | 11,0624749 | 5,14e-10 |
| Macrophage stimulating 1 (hepatocyte growth factor-like)                                                      | <i>Mst1</i>            | 11,0203291 | 2,80e-10 |
| Popeye domain containing 3                                                                                    | <i>Popdc3</i>          | 10,9878919 | 7,13e-10 |
| Bai1-associated protein 2-like 1                                                                              | <i>Baiap2l1</i>        | 10,9837463 | 2,39e-10 |
| A disintegrin-like and metallopeptidase (reprolysin type) with thrombospondin type 1 motif, 5 (aggrecanase-2) | <i>Adamts5</i>         | 10,9726393 | 8,33e-10 |
| Synaptotagmin xvii                                                                                            | <i>Syt17</i>           | 10,6265575 | 4,77e-10 |
| Chemokine (c-x-c motif) ligand 1                                                                              | <i>Cxcl1</i>           | 10,3416451 | 1,53e-08 |
| Serine (or cysteine) peptidase inhibitor, clade b, member 1b                                                  | <i>Serpinb1b</i>       | 10,339474  | 3,64e-09 |
| Catenin (cadherin associated protein), alpha-like 1                                                           | <i>Ctnnal1</i>         | 10,2965725 | 1,42e-08 |
| Zinc finger protein 105                                                                                       | <i>Zfp105</i>          | 10,2378927 | 1,40e-09 |
| Solute carrier family 9 (sodium/hydrogen exchanger), member 3 regulator 1                                     | <i>Slc9a3r1</i>        | 10,0674235 | 5,42e-07 |
| Ectonucleotide pyrophosphatase/phosphodiesterase                                                              | <i>Enpp5</i>           | 10,0577013 | 3,79e-07 |

|                                                                                        |                                 |            |          |
|----------------------------------------------------------------------------------------|---------------------------------|------------|----------|
| 5                                                                                      |                                 |            |          |
| Solute carrier family 43, member 3                                                     | <i>Slc43a3</i>                  | 9,96545905 | 6,11e-09 |
| Desmocollin 2                                                                          | <i>Dsc2</i>                     | 9,94883984 | 4,88e-09 |
| Heat shock protein 2                                                                   | <i>Hspb2</i>                    | 9,82876492 | 4,14e-09 |
| Connective tissue growth factor                                                        | <i>Ctgf</i>                     | 9,57441142 | 4,39e-09 |
| Tribbles homolog 3 (drosophila)                                                        | <i>Trib3</i>                    | 9,53697454 | 1,64e-09 |
| Nephronectin                                                                           | <i>Npnt</i>                     | 9,46130568 | 2,52e-07 |
| Sphingomyelin phosphodiesterase, acid-like 3b                                          | <i>Smpdl3b</i>                  | 9,37370116 | 9,58e-09 |
| Ubiquitin specific peptidase 17-like a                                                 | <i>Usp17la</i>                  | 9,36072912 | 9,36e-08 |
| Tripartite motif-containing 25                                                         | <i>Trim25</i>                   | 9,29259936 | 1,05e-08 |
| Sh3 domain binding glutamic acid-rich protein like 2                                   | <i>Sh3bgrl2</i>                 | 9,0220444  | 2,69e-09 |
| Annexin a6                                                                             | <i>Anxa6</i>                    | 8,99258429 | 4,50e-07 |
| Glutathione peroxidase 3                                                               | <i>Gpx3</i>                     | 8,87433641 | 2,91e-08 |
| Family with sequence similarity 20, member c                                           | <i>Fam20c</i>                   | 8,80749077 | 3,44e-08 |
| Family with sequence similarity 134, member b                                          | <i>Fam134b</i>                  | 8,78932439 | 1,31e-08 |
| Protein kinase d1                                                                      | <i>Prkd1</i>                    | 8,77336041 | 4,83e-10 |
| Solute carrier family 25 (mitochondrial carrier; phosphate carrier), member 23         | <i>Slc25a23</i>                 | 8,69847613 | 2,30e-06 |
| Myocardial zonula adherens protein                                                     | <i>Myzap</i>                    | 8,66693724 | 2,14e-07 |
| Nebulette                                                                              | <i>Neb1</i>                     | 8,61877963 | 1,12e-06 |
| Serine (or cysteine) peptidase inhibitor, clade b, member 7                            | <i>Serpinb7</i>                 | 8,61561834 | 1,12e-06 |
| Interleukin 6                                                                          | <i>Il6</i>                      | 8,61330577 | 4,01e-08 |
| Chemokine (c-x-c motif) ligand 2                                                       | <i>Cxcl2</i>                    | 8,60423268 | 1,48e-06 |
| Growth arrest specific 6                                                               | <i>Gas6</i>                     | 8,59505808 | 1,50e-07 |
| Cd93 antigen                                                                           | <i>Cd93</i>                     | 8,5757243  | 8,36e-08 |
| Insulin receptor substrate 1                                                           | <i>Irs1</i>                     | 8,45853578 | 4,26e-09 |
| Solute carrier family 16 (monocarboxylic acid transporters), member 1                  | <i>Slc16a1</i>                  | 8,42594253 | 1,55e-08 |
| Glycerophosphodiester phosphodiesterase domain containing 2                            | <i>Gdpd2</i>                    | 8,3904879  | 1,23e-09 |
| Phosphatidylinositol-4-phosphate 5-kinase, type 1 beta                                 | <i>Pip5k1b</i>                  | 8,37876708 | 1,02e-09 |
| Suppressor of cytokine signaling 2                                                     | <i>Socs2</i>                    | 8,33656316 | 8,28e-08 |
| Glycine receptor, beta subunit                                                         | <i>Glr3</i>                     | 8,20036137 | 9,96e-06 |
| Solute carrier family 44, member 2                                                     | <i>Slc44a2</i>                  | 8,19686952 | 4,71e-07 |
| Adipocyte-related x-chromosome expressed sequence 1 /// adipocyte-related x-chromosome | <i>Arxes1</i> /// <i>arxes2</i> | 8,10228786 | 1,51e-07 |

|                                                                                             |                        |            |            |
|---------------------------------------------------------------------------------------------|------------------------|------------|------------|
| expressed sequence 2                                                                        |                        |            |            |
| B cell linker                                                                               | <i>Blnk</i>            | 7,95303684 | 2,77e-08   |
| Collagen, type iv, alpha 5                                                                  | <i>Col4a5</i>          | 7,94933318 | 3,50e-08   |
| Calcium channel, voltage-dependent, gamma subunit 6                                         | <i>Cacng6</i>          | 7,93096642 | 1,26e-08   |
| Rwd domain containing 3                                                                     | <i>Rwdd3</i>           | 7,89589827 | 3,31e-08   |
| Ccaat/enhancer binding protein (c/ebp), delta                                               | <i>Cebpd</i>           | 7,86146106 | 6,34e-08   |
| Scavenger receptor class a, member 3                                                        | <i>Scara3</i>          | 7,77173329 | 5,45e-09   |
| Cyclin-dependent kinase 18                                                                  | <i>Cdk18</i>           | 7,64628151 | 1,27e-07   |
| Histocompatibility 2, class ii, locus mb1 ///                                               | <i>H2-dmb1 ///</i> h2- | 7,60869351 | 1,30e-06   |
| histocompatibility 2, class ii, locus mb2                                                   | <i>dmb2</i>            |            |            |
| Cytoplasmic polyadenylation element binding protein 1                                       | <i>Cpeb1</i>           | 7,57315096 | 2,27e-08   |
| Riken cdna d430019h16 gene                                                                  | <i>D430019h16rik</i>   | 7,53217179 | 2,23e-09   |
| Chloride channel calcium activated 4                                                        | <i>Clca4</i>           | 7,50820533 | 5,21e-06   |
| Sorbitol dehydrogenase                                                                      | <i>Sord</i>            | 7,46151838 | 1,00e-09   |
| Armadillo repeat containing, x-linked 4                                                     | <i>Armxc4</i>          | 7,42627595 | 2,98e-09   |
| Pentraxin related gene                                                                      | <i>Ptx3</i>            | 7,35517447 | 7,04e-08   |
| Argininosuccinate synthetase 1 /// argininosuccinate synthase pseudogene                    | <i>Ass1 ///</i> gm5424 | 7,24946014 | 0,00013394 |
| Zinc finger protein, multitype 2                                                            | <i>Zfpm2</i>           | 7,23172412 | 1,38e-09   |
| Laminin, alpha 2                                                                            | <i>Lama2</i>           | 7,19131726 | 5,96e-08   |
| Syncoilin                                                                                   | <i>Sync</i>            | 7,14666344 | 2,97e-09   |
| Serine (or cysteine) peptidase inhibitor, clade b, member 9c                                | <i>Serpinb9c</i>       | 7,13487199 | 4,14e-09   |
| 4-nitrophenylphosphatase domain and non-neuronal snap25-like protein homolog 1 (c. Elegans) | <i>Nipsnap1</i>        | 7,09989621 | 9,73e-09   |
| Iroquois related homeobox 3                                                                 | <i>Irx3</i>            | 7,09889691 | 2,34e-09   |
| Histocompatibility 2, class ii antigen a, alpha                                             | <i>H2-aa</i>           | 7,07783565 | 2,30e-07   |
| Cysteine-rich with egf-like domains 1                                                       | <i>Creld1</i>          | 7,05459206 | 2,85e-08   |
| Major facilitator superfamily domain containing 6                                           | <i>Mfsd6</i>           | 7,0328259  | 2,01e-08   |
| Colony stimulating factor 1 receptor                                                        | <i>Csf1r</i>           | 7,02538882 | 5,37e-09   |
| Frizzled homolog 7 (drosophila)                                                             | <i>Fzd7</i>            | 7,00319613 | 9,39e-08   |
| Adenosine a2b receptor                                                                      | <i>Adora2b</i>         | 6,87035716 | 7,77e-09   |
| Tenascin c                                                                                  | <i>Tnc</i>             | 6,83855937 | 1,31e-07   |
| Leptin receptor                                                                             | <i>Lepr</i>            | 6,78236926 | 2,43e-07   |
| Myelin protein zero-like 2                                                                  | <i>Mpzl2</i>           | 6,78060013 | 2,60e-08   |
| Thrombospondin 3                                                                            | <i>Thbs3</i>           | 6,77420917 | 2,47e-08   |

|                                                                                               |                                        |            |            |
|-----------------------------------------------------------------------------------------------|----------------------------------------|------------|------------|
| Sperm associated antigen 1                                                                    | <i>Spag1</i>                           | 6,76178582 | 3,57e-06   |
| Transmembrane protein 38b                                                                     | <i>Tmem38b</i>                         | 6,65823654 | 2,78e-07   |
| Cytochrome b-245, alpha polypeptide                                                           | <i>Cyba</i>                            | 6,6243535  | 3,73e-09   |
| Corneodesmosin                                                                                | <i>Cdsn</i>                            | 6,61225033 | 0,00014979 |
| Proteoglycan 4 (megakaryocyte stimulating factor, articular superficial zone protein)         | <i>Prg4</i>                            | 6,60577436 | 1,60e-07   |
| Bh3 interacting domain death agonist                                                          | <i>Bid</i>                             | 6,60426871 | 6,11e-08   |
| Frizzled homolog 6 (drosophila)                                                               | <i>Fzd6</i>                            | 6,5764071  | 5,16e-08   |
| Crystallin, beta a4                                                                           | <i>Cryba4</i>                          | 6,56556825 | 9,30e-07   |
| Solute carrier organic anion transporter family, member 1a5                                   | <i>Slco1a5</i>                         | 6,55230996 | 6,42e-09   |
| Phosphodiesterase 2a, cgmp-stimulated                                                         | <i>Pde2a</i>                           | 6,3984059  | 2,38e-08   |
| Phosphatidic acid phosphatase type 2 domain containing 3                                      | <i>Ppapdc3</i>                         | 6,39715452 | 7,40e-08   |
| Tubulin, beta 2b class iib                                                                    | <i>Tubb2b</i>                          | 6,30517352 | 2,58e-08   |
| Carboxymethylenebutenolidase-like (pseudomonas)                                               | <i>Cmbl</i>                            | 6,27022941 | 1,23e-08   |
| A disintegrin-like and metallopeptidase (reprolysin type) with thrombospondin type 1 motif, 4 | <i>Adamts4</i>                         | 6,22780265 | 4,09e-09   |
| Arginine/serine rich protein 1                                                                | <i>Rsrp1</i>                           | 6,18309528 | 2,27e-08   |
| Tubulin, beta 2a, pseudogene 2 /// tubulin, beta 2b class iib                                 | <i>Tubb2a-ps2 ///</i><br><i>tubb2b</i> | 6,15880646 | 1,31e-07   |
| Cdna sequence bc002189                                                                        | <i>Bc002189</i>                        | 6,1559937  | 1,27e-05   |
| Microtubule associated monooxygenase, calponin and lim domain containing 1                    | <i>Mical1</i>                          | 6,14099325 | 3,69e-07   |
| Sialic acid acetyltransferase                                                                 | <i>Siae</i>                            | 6,13351655 | 1,50e-07   |
| Collagen, type viii, alpha 1                                                                  | <i>Col8a1</i>                          | 6,13261464 | 4,57e-09   |
| AtPase, na+/k+ transporting, alpha 3 polypeptide                                              | <i>Atp1a3</i>                          | 6,13079538 | 2,26e-05   |
| Spla/ryanodine receptor domain and socs box containing 1                                      | <i>Spsb1</i>                           | 6,1148469  | 1,60e-08   |
| Calponin 1                                                                                    | <i>Cnn1</i>                            | 6,10293608 | 1,15e-08   |
| Homeobox b13                                                                                  | <i>Hoxb13</i>                          | 6,05221811 | 2,48e-08   |
| Family with sequence similarity 213, member a                                                 | <i>Fam213a</i>                         | 6,05082732 | 1,71e-06   |
| Nucleic acid binding protein 1                                                                | <i>Nabp1</i>                           | 6,03694432 | 1,23e-05   |
| Lysyl oxidase-like 4                                                                          | <i>Loxl4</i>                           | 5,95325429 | 1,91e-07   |
| Glucosaminyl (n-acetyl) transferase 2, i-branching enzyme                                     | <i>Gcnt2</i>                           | 5,92555258 | 8,62e-08   |
| Troponin i, skeletal, slow 1                                                                  | <i>Tnni1</i>                           | 5,91874753 | 4,39e-09   |
| Sema domain, immunoglobulin domain (ig), short                                                | <i>Sema3b</i>                          | 5,84929325 | 2,18e-09   |

|                                                                                     |                         |            |          |
|-------------------------------------------------------------------------------------|-------------------------|------------|----------|
| basic domain, secreted, (semaphorin) 3b                                             |                         |            |          |
| Transporter 2, atp-binding cassette, sub-family b (mdr/tap)                         | <i>Tap2</i>             | 5,84246079 | 5,23e-08 |
| Nicotinamide nucleotide adenylyltransferase 3                                       | <i>Nmnat3</i>           | 5,8335704  | 1,50e-07 |
| Cyclin-dependent kinase inhibitor 2b (p15, inhibits cdk4)                           | <i>Cdkn2b</i>           | 5,82254027 | 1,19e-06 |
| Riken cdna 2210016f16 gene                                                          | <i>2210016f16rik</i>    | 5,80380166 | 1,54e-09 |
| Oligodendrocyte transcription factor 1                                              | <i>Olig1</i>            | 5,79893517 | 8,94e-09 |
| Chymotrypsin-like elastase family, member 1                                         | <i>Cela1</i>            | 5,79036335 | 3,02e-07 |
| Lectin, galactose binding, soluble 3                                                | <i>Lgals3</i>           | 5,78710731 | 3,25e-09 |
| Collagen, type v, alpha 2                                                           | <i>Col5a2</i>           | 5,74609547 | 4,27e-08 |
| Nebulin-related anchoring protein                                                   | <i>Nrap</i>             | 5,73403984 | 7,82e-09 |
| Ankyrin repeat domain 10                                                            | <i>Ankrd10</i>          | 5,72663546 | 4,74e-08 |
| F-box protein 17                                                                    | <i>Fbxo17</i>           | 5,6993703  | 2,77e-07 |
| Frizzled homolog 4 (drosophila)                                                     | <i>Fzd4</i>             | 5,67857564 | 9,36e-08 |
| Matrix metalloproteinase 3                                                          | <i>Mmp3</i>             | 5,67235928 | 1,51e-07 |
| Abhydrolase domain containing 6                                                     | <i>Abhd6</i>            | 5,66243903 | 2,03e-07 |
| Membrane bound o-acyltransferase domain containing 2                                | <i>Mboat2</i>           | 5,65243602 | 1,28e-07 |
| Glycoprotein 49 a /// leukocyte immunoglobulin-like receptor, subfamily b, member 4 | <i>Gp49a /// lilrb4</i> | 5,63720139 | 5,77e-07 |
| Desmin                                                                              | <i>Des</i>              | 5,6326621  | 9,73e-08 |
| Signal-regulatory protein alpha                                                     | <i>Sirpa</i>            | 5,6119533  | 6,46e-09 |
| Glucosidase, alpha, acid                                                            | <i>Gaa</i>              | 5,53710561 | 6,92e-09 |
| Paired box 7                                                                        | <i>Pax7</i>             | 5,52061382 | 3,88e-06 |
| Cdc42 effector protein (rho gtpase binding) 5                                       | <i>Cdc42ep5</i>         | 5,51930655 | 6,24e-08 |
| Diaphanous homolog 2 (drosophila)                                                   | <i>Diap2</i>            | 5,44676132 | 5,19e-08 |
| Dipeptidylpeptidase 7                                                               | <i>Dpp7</i>             | 5,43888167 | 1,95e-08 |
| Interleukin 13 receptor, alpha 1                                                    | <i>Il13ra1</i>          | 5,42166816 | 6,39e-07 |
| Odd-skipped related 1 (drosophila)                                                  | <i>Osr1</i>             | 5,41156846 | 2,63e-07 |
| Protein tyrosine phosphatase, receptor type, d                                      | <i>Ptprd</i>            | 5,38522737 | 1,92e-07 |
| Phosphoprotein associated with glycosphingolipid microdomains 1                     | <i>Pag1</i>             | 5,37214032 | 2,42e-08 |
| Lim and cysteine-rich domains 1                                                     | <i>Lmcd1</i>            | 5,32703934 | 1,55e-07 |
| G protein-coupled receptor 155                                                      | <i>Gpr155</i>           | 5,32676384 | 7,47e-08 |
| Junction adhesion molecule 3                                                        | <i>Jam3</i>             | 5,27362029 | 4,91e-07 |
| Trimethyllysine hydroxylase, epsilon                                                | <i>Tmlhe</i>            | 5,26236433 | 1,92e-07 |
| Enolase 3, beta muscle                                                              | <i>Eno3</i>             | 5,25445053 | 1,00e-08 |



|                                                                                       |                            |            |            |
|---------------------------------------------------------------------------------------|----------------------------|------------|------------|
| Transforming growth factor, beta 2                                                    | <i>Tgfb2</i>               | 5,2467938  | 7,09e-06   |
| Methyltransferase like 20                                                             | <i>Mettl20</i>             | 5,24389571 | 4,46e-07   |
| Aldo-keto reductase family 1, member c12 /// aldo-keto reductase family 1, member c13 | <i>Akr1c12 /// akr1c13</i> | 5,24230714 | 2,40e-07   |
| Kruppel-like factor 2 (lung)                                                          | <i>Klf2</i>                | 5,23894391 | 2,56e-08   |
| Zinc finger protein 37                                                                | <i>Zfp37</i>               | 5,22924084 | 2,02e-07   |
| Absent in melanoma 1                                                                  | <i>Aim1</i>                | 5,2056271  | 3,29e-08   |
| Oncostatin m receptor                                                                 | <i>Osmr</i>                | 5,20494858 | 5,19e-08   |
| Dep domain containing mtor-interacting protein                                        | <i>Deptor</i>              | 5,20194988 | 4,46e-07   |
| Wap four-disulfide core domain 2                                                      | <i>Wfdc2</i>               | 5,19683973 | 3,29e-08   |
| Cbp/p300-interacting transactivator, with glu/asp-rich carboxy-terminal domain, 2     | <i>Cited2</i>              | 5,1790888  | 0,00016919 |
| Lysyl oxidase                                                                         | <i>Lox</i>                 | 5,16636401 | 3,54e-08   |
| Zinc finger protein 422                                                               | <i>Zfp422</i>              | 5,13890194 | 4,42e-07   |
| Nlr family, apoptosis inhibitory protein 2                                            | <i>Naip2</i>               | 5,1355031  | 5,55e-09   |
| Transcobalamin 2                                                                      | <i>Tcn2</i>                | 5,08744073 | 2,16e-08   |
| Phytanoyl-coa hydroxylase                                                             | <i>Phyh</i>                | 5,05931391 | 3,54e-07   |
| Expressed sequence ai464131                                                           | <i>Ai464131</i>            | 5,04212891 | 1,36e-08   |
| Histocompatibility 13                                                                 | <i>H13</i>                 | 5,02698964 | 1,19e-08   |
| Abhydrolase domain containing 3                                                       | <i>Abhd3</i>               | 5,0010698  | 6,89e-06   |
| Sh3-domain grb2-like 3                                                                | <i>Sh3gl3</i>              | 4,98341561 | 2,97e-06   |
| Coagulation factor iii                                                                | <i>F3</i>                  | 4,95303317 | 1,65e-06   |
| Cytochrome b5 reductase 1                                                             | <i>Cyb5r1</i>              | 4,94475954 | 2,40e-09   |
| Coxsackie virus and adenovirus receptor                                               | <i>Cxadr</i>               | 4,94050154 | 9,21e-07   |
| Serine (or cysteine) peptidase inhibitor, clade b, member 9                           | <i>Serpinb9</i>            | 4,92746    | 1,16e-07   |
| Paired box 6                                                                          | <i>Pax6</i>                | 4,919596   | 6,02e-07   |
| Ribosomal protein s6 kinase, polypeptide 2                                            | <i>Rps6ka2</i>             | 4,91152128 | 8,49e-09   |
| Aldo-keto reductase family 1, member c13                                              | <i>Akr1c13</i>             | 4,91011754 | 1,27e-07   |
| Family with sequence similarity 132, member a                                         | <i>Fam132a</i>             | 4,89962897 | 7,02e-07   |
| Arrestin domain containing 4                                                          | <i>Arrdc4</i>              | 4,89608684 | 1,97e-07   |
| Slit-robo rho gtpase activating protein 3                                             | <i>Srgap3</i>              | 4,86392163 | 3,67e-09   |
| Paraoxonase 3                                                                         | <i>Pon3</i>                | 4,83640802 | 4,34e-07   |
| Star-related lipid transfer (start) domain containing 5                               | <i>Stard5</i>              | 4,81921467 | 2,77e-08   |
| Carbohydrate (n-acetylgalactosamine 4-sulfate 6-o) sulfotransferase 15                | <i>Chst15</i>              | 4,81914725 | 8,04e-07   |
| Nidogen 2                                                                             | <i>Nid2</i>                | 4,8113096  | 3,21e-08   |
| Secretory leukocyte peptidase inhibitor                                               | <i>Slpi</i>                | 4,80523642 | 5,80e-08   |

|                                                                                                                                          |                                                  |            |          |
|------------------------------------------------------------------------------------------------------------------------------------------|--------------------------------------------------|------------|----------|
| Alpha-kinase 2                                                                                                                           | <i>Alpk2</i>                                     | 4,79585048 | 1,51e-07 |
| Avian reticuloendotheliosis viral (v-rel) oncogene related b                                                                             | <i>Relb</i>                                      | 4,79003124 | 8,84e-09 |
| Notch 4                                                                                                                                  | <i>Notch4</i>                                    | 4,76915719 | 1,92e-07 |
| Transmembrane protein with egf-like and two follistatin-like domains 1                                                                   | <i>Tmeff1</i>                                    | 4,73624182 | 1,48e-06 |
| Cd59a antigen                                                                                                                            | <i>Cd59a</i>                                     | 4,73555908 | 1,36e-07 |
| Ephrin b2                                                                                                                                | <i>Efnb2</i>                                     | 4,73444866 | 4,98e-09 |
| Pyruvate dehydrogenase kinase, isoenzyme 4                                                                                               | <i>Pdk4</i>                                      | 4,69310715 | 1,50e-08 |
| Retinol dehydrogenase 10 (all-trans)                                                                                                     | <i>Rdh10</i>                                     | 4,6572334  | 8,15e-07 |
| Armadillo repeat containing, x-linked 3                                                                                                  | <i>Armctx3</i>                                   | 4,63489283 | 3,33e-08 |
| Glutathione s-transferase, alpha 4                                                                                                       | <i>Gsta4</i>                                     | 4,63156367 | 8,57e-08 |
| Wolfram syndrome 1 homolog (human)                                                                                                       | <i>Wfs1</i>                                      | 4,63122293 | 1,91e-09 |
| F-box protein 32                                                                                                                         | <i>Fbxo32</i>                                    | 4,62714996 | 1,68e-06 |
| Ras association (ralgds/af-6) domain family member 2                                                                                     | <i>Rassf2</i>                                    | 4,60934949 | 7,72e-08 |
| Spry domain containing 7                                                                                                                 | <i>Spryd7</i>                                    | 4,58925856 | 8,51e-07 |
| Epidermal growth factor receptor                                                                                                         | <i>Egfr</i>                                      | 4,58894804 | 3,19e-07 |
| Integrin alpha 6                                                                                                                         | <i>Itga6</i>                                     | 4,57817942 | 2,53e-07 |
| Nedd4 binding protein 2-like 1                                                                                                           | <i>N4bp2l1</i>                                   | 4,57486826 | 8,95e-07 |
| Interleukin-1 receptor-associated kinase 1 binding protein 1                                                                             | <i>Irak1bp1</i>                                  | 4,56514276 | 7,33e-06 |
| Solute carrier family 29 (nucleoside transporters), member 1                                                                             | <i>Slc29a1</i>                                   | 4,55091759 | 1,34e-08 |
| Early b cell factor 3                                                                                                                    | <i>Ebf3</i>                                      | 4,51436097 | 4,49e-07 |
| Protocadherin beta 9                                                                                                                     | <i>Pcdh9</i>                                     | 4,50882213 | 3,71e-05 |
| Brain derived neurotrophic factor                                                                                                        | <i>Bdnf</i>                                      | 4,49506893 | 4,58e-07 |
| Spermatogenesis associated glutamate (e)-rich protein 4a                                                                                 | <i>Speer4a</i>                                   | 4,48628169 | 1,30e-05 |
| Phosphatase domain containing, paladin 1 /// thrombospondin 1                                                                            | <i>Pald1 /// thbs1</i>                           | 4,46977616 | 1,31e-08 |
| Phosphodiesterase 1a, calmodulin-dependent                                                                                               | <i>Pde1a</i>                                     | 4,41000871 | 7,64e-09 |
| Myomesin 2                                                                                                                               | <i>Myom2</i>                                     | 4,40803791 | 1,75e-07 |
| Riken cdna c920025e04 gene /// histocompatibility 2, t region locus 23 /// h-2 class i histocompatibility antigen, d-37 alpha chain-like | <i>C920025e04rik /// h2-t23 /// loc102641046</i> | 4,37294094 | 8,34e-08 |
| Paraoxonase 2                                                                                                                            | <i>Pon2</i>                                      | 4,35396448 | 7,95e-06 |
| Transcription factor ap-2, gamma                                                                                                         | <i>Tfap2c</i>                                    | 4,34765705 | 6,71e-06 |

|                                                                                    |                              |            |            |
|------------------------------------------------------------------------------------|------------------------------|------------|------------|
| Interferon induced transmembrane protein 10                                        | <i>Ifitm10</i>               | 4,34611919 | 1,40e-07   |
| Histocompatibility 2, k1, k region                                                 | <i>H2-k1</i>                 | 4,34413063 | 3,96e-07   |
| Laminin, beta 2                                                                    | <i>Lamb2</i>                 | 4,33883166 | 6,84e-08   |
| Hepatic leukemia factor                                                            | <i>Hlf</i>                   | 4,32416788 | 4,44e-06   |
| Phospholipase c, beta 4                                                            | <i>Plcb4</i>                 | 4,31898961 | 4,66e-05   |
| Histocompatibility 2, d region locus 1                                             | <i>H2-d1</i>                 | 4,28840606 | 4,75e-06   |
| Adenylate kinase 3                                                                 | <i>Ak3</i>                   | 4,28115987 | 5,26e-07   |
| Chac, cation transport regulator 1                                                 | <i>Chac1</i>                 | 4,27893561 | 8,23e-09   |
| Aldehyde dehydrogenase 18 family, member a1                                        | <i>Aldh18a1</i>              | 4,2739759  | 2,02e-06   |
| Secretogranin v                                                                    | <i>Scg5</i>                  | 4,26699148 | 2,87e-06   |
| Dysbindin (dystrobrevin binding protein 1) domain containing 2                     | <i>Dbn2</i>                  | 4,25488728 | 5,33e-07   |
| Stathmin-like 2                                                                    | <i>Stmn2</i>                 | 4,25254338 | 1,89e-07   |
| Histone cluster 1, h3b /// histone cluster 1, h3c ///                              | <i>Hist1h3b /// hist1h3c</i> | 4,23469253 | 3,69e-07   |
| histone cluster 1, h3d /// histone cluster 1, h3e ///                              | <i>/// hist1h3d ///</i>      |            |            |
| histone cluster 1, h3f /// histone cluster 2, h3b ///                              | <i>hist1h3e /// hist1h3f</i> |            |            |
| histone cluster 2, h3c1 /// histone cluster 2, h3c2                                | <i>/// hist2h3b ///</i>      |            |            |
|                                                                                    | <i>hist2h3c1 ///</i>         |            |            |
|                                                                                    | <i>hist2h3c2</i>             |            |            |
| Nhs-like 1                                                                         | <i>Nhsl1</i>                 | 4,22979457 | 1,31e-05   |
| Distal-less homeobox 4                                                             | <i>Dlx4</i>                  | 4,20102902 | 3,72e-07   |
| Acyl-coa thioesterase 4                                                            | <i>Acot4</i>                 | 4,20080419 | 1,10e-05   |
| Nucleolar protein 3 (apoptosis repressor with card domain)                         | <i>Nol3</i>                  | 4,19311634 | 3,25e-06   |
| Stanniocalcin 2                                                                    | <i>Stc2</i>                  | 4,1513433  | 1,21e-07   |
| Gene regulated by estrogen in breast cancer protein                                | <i>Greb1</i>                 | 4,14370896 | 1,79e-06   |
| Rho gtpase activating protein 12                                                   | <i>Arhgap12</i>              | 4,13656083 | 1,13e-06   |
| Histocompatibility 2, d region locus 1 ///                                         | <i>H2-d1 /// h2-l</i>        | 4,13256601 | 1,22e-07   |
| histocompatibility 2, d region locus 1                                             |                              |            |            |
| Nuclear factor of kappa light polypeptide gene enhancer in b cells inhibitor, zeta | <i>Nfkbiz</i>                | 4,12791581 | 2,16e-07   |
| Lmbr1 domain containing 1                                                          | <i>Lmbrd1</i>                | 4,11422426 | 2,24e-06   |
| Phosphoprotein enriched in astrocytes 15a                                          | <i>Pea15a</i>                | 4,1001268  | 1,43e-08   |
| Scavenger receptor class a, member 5 (putative)                                    | <i>Scara5</i>                | 4,09568202 | 1,92e-07   |
| Cysteine rich protein 61                                                           | <i>Cyr61</i>                 | 4,0854476  | 0,00021573 |
| Presenilin 2                                                                       | <i>Psen2</i>                 | 4,07580014 | 3,87e-07   |
| Peroxisomal biogenesis factor 11 alpha                                             | <i>Pex11a</i>                | 4,06667325 | 3,85e-07   |
| Histone cluster 1, h2bc /// histone cluster 1, h2be ///                            | <i>Hist1h2bc ///</i>         | 4,06089085 | 1,51e-08   |

|                                                                          |                      |            |          |
|--------------------------------------------------------------------------|----------------------|------------|----------|
| histone cluster 1, h2bg                                                  | <i>hist1h2be ///</i> |            |          |
|                                                                          | <i>hist1h2bg</i>     |            |          |
| Basonuclin 1                                                             | <i>Bnc1</i>          | 4,05812254 | 1,36e-07 |
| Chitinase domain containing 1                                            | <i>Chid1</i>         | 4,05488187 | 4,43e-07 |
| Glutathione s-transferase, alpha 2 (yc2)                                 | <i>Gsta2</i>         | 4,04051591 | 1,22e-06 |
| Regulator of g-protein signaling 16                                      | <i>Rgs16</i>         | 4,01509719 | 2,96e-07 |
| Sulfide quinone reductase-like (yeast)                                   | <i>Sqrdl</i>         | 4,00820527 | 3,36e-08 |
| Chromobox 4                                                              | <i>Cbx4</i>          | 4,00115982 | 5,64e-07 |
| Nudix (nucleoside diphosphate linked moiety x)-<br>type motif 7          | <i>Nudt7</i>         | 3,99598398 | 4,29e-07 |
| Rho family gtpase 3                                                      | <i>Rnd3</i>          | 3,98660737 | 1,27e-05 |
| Spermatid perinuclear rna binding protein                                | <i>Strbp</i>         | 3,98464535 | 1,99e-05 |
| Inad-like (drosophila)                                                   | <i>Inadl</i>         | 3,96495803 | 5,14e-08 |
| Interferon activated gene 204                                            | <i>Ifi204</i>        | 3,9549975  | 6,85e-05 |
| Ubiquitin specific peptidase 11                                          | <i>Usp11</i>         | 3,9437928  | 4,63e-07 |
| Cxxc finger 5                                                            | <i>Cxxc5</i>         | 3,94333733 | 1,02e-07 |
| Integrin alpha 7                                                         | <i>Itga7</i>         | 3,91995842 | 1,48e-08 |
| Junction adhesion molecule 2                                             | <i>Jam2</i>          | 3,91947843 | 1,63e-06 |
| Schlafen 2                                                               | <i>Slfn2</i>         | 3,91420101 | 1,27e-06 |
| Coronin 6                                                                | <i>Coro6</i>         | 3,8999345  | 2,38e-05 |
| Complement component 3                                                   | <i>C3</i>            | 3,8930827  | 1,23e-07 |
| Protein tyrosine phosphatase, receptor type, k                           | <i>Ptprk</i>         | 3,89263761 | 7,82e-09 |
| Plexin d1                                                                | <i>Plxnd1</i>        | 3,88784549 | 3,75e-07 |
| Homeodomain interacting protein kinase 2                                 | <i>Hipk2</i>         | 3,88525545 | 1,63e-06 |
| Retinoic acid receptor, beta                                             | <i>Rarb</i>          | 3,86674274 | 2,97e-06 |
| Cathepsin h                                                              | <i>Ctsh</i>          | 3,86634296 | 3,35e-08 |
| Ajuba lim protein                                                        | <i>Ajuba</i>         | 3,85323289 | 2,46e-08 |
| Nadh dehydrogenase (ubiquinone) 1 alpha<br>subcomplex, assembly factor 1 | <i>Ndufaf1</i>       | 3,84897563 | 1,43e-08 |
| Torsin a interacting protein 2                                           | <i>Tor1aip2</i>      | 3,83997571 | 4,87e-08 |
| Carbonyl reductase 3                                                     | <i>Cbr3</i>          | 3,8365699  | 3,06e-07 |
| Ubiquitin specific peptidase 53                                          | <i>Usp53</i>         | 3,83071714 | 2,07e-06 |
| Tuftelin 1                                                               | <i>Tuft1</i>         | 3,81101508 | 2,14e-08 |
| Transgelin 3                                                             | <i>Tagln3</i>        | 3,80111166 | 1,86e-07 |
| Midline 2                                                                | <i>Mid2</i>          | 3,79354692 | 7,28e-08 |
| Zinc finger protein of the cerebellum 2                                  | <i>Zic2</i>          | 3,78115133 | 2,10e-07 |
| Toll-like receptor 2                                                     | <i>Tlr2</i>          | 3,77234306 | 9,90e-08 |
| Bmp and activin membrane-bound inhibitor                                 | <i>Bambi</i>         | 3,76828002 | 5,24e-05 |

|                                                                              |                               |            |          |
|------------------------------------------------------------------------------|-------------------------------|------------|----------|
| Tropomyosin 3, gamma                                                         | <i>Tpm3</i>                   | 3,76316031 | 3,19e-05 |
| Zinc and ring finger 2                                                       | <i>Znrf2</i>                  | 3,75124192 | 2,47e-07 |
| Phosphoenolpyruvate carboxykinase 2<br>(mitochondrial)                       | <i>Pck2</i>                   | 3,74763885 | 2,89e-08 |
| Sperm autoantigenic protein 17                                               | <i>Spa17</i>                  | 3,7358548  | 2,53e-06 |
| Forkhead box o1                                                              | <i>Foxo1</i>                  | 3,73047325 | 3,30e-05 |
| Cathepsin f                                                                  | <i>Ctsf</i>                   | 3,72617381 | 1,51e-08 |
| Zinc finger and btb domain containing 18                                     | <i>Zbtb18</i>                 | 3,72329806 | 1,42e-08 |
| Zinc finger protein of the cerebellum 5                                      | <i>Zic5</i>                   | 3,7193544  | 4,81e-07 |
| Immunoglobulin superfamily, member 8                                         | <i>Igsf8</i>                  | 3,69573683 | 1,25e-05 |
| Trna methyltransferase 10c                                                   | <i>Trmt10c</i>                | 3,69197755 | 2,62e-06 |
| Ferm domain containing 4b                                                    | <i>Frmd4b</i>                 | 3,6916088  | 2,90e-05 |
| Xin actin-binding repeat containing 1                                        | <i>Xirp1</i>                  | 3,67610474 | 6,63e-05 |
| Guanine nucleotide binding protein (g protein), beta<br>5                    | <i>Gnb5</i>                   | 3,67463917 | 1,28e-07 |
| S100 calcium binding protein a16                                             | <i>S100a16</i>                | 3,66152551 | 8,49e-09 |
| Protocadherin 1                                                              | <i>Pcdh1</i>                  | 3,65714613 | 7,45e-06 |
| Serglycin                                                                    | <i>Srgn</i>                   | 3,65184969 | 3,60e-06 |
| Arsenic (+3 oxidation state) methyltransferase                               | <i>As3mt</i>                  | 3,64124535 | 1,32e-06 |
| Atp-binding cassette, sub-family a (abc1), member 1                          | <i>Abca1</i>                  | 3,63463152 | 2,00e-05 |
| Zinc finger and btb domain containing 46                                     | <i>Zbtb46</i>                 | 3,62069651 | 2,87e-08 |
| Solute carrier family 6 (neurotransmitter transporter,<br>glycine), member 9 | <i>Slc6a9</i>                 | 3,61969718 | 8,36e-08 |
| Disabled 2, mitogen-responsive phosphoprotein                                | <i>Dab2</i>                   | 3,60856986 | 1,48e-06 |
| Ferredoxin 1-like /// raver1-fdx1l readthrough                               | <i>Fdx1l /// raver1-fdx1l</i> | 3,60571795 | 1,01e-07 |
| Expressed sequence aw209491                                                  | <i>Aw209491</i>               | 3,60076532 | 1,23e-07 |
| Tetraspanin 7                                                                | <i>Tspan7</i>                 | 3,58309406 | 1,32e-06 |
| Dtw domain containing 1                                                      | <i>Dtwd1</i>                  | 3,58062492 | 2,32e-07 |
| Estrogen related receptor, beta                                              | <i>Esrrb</i>                  | 3,58025051 | 6,64e-06 |
| Rab27b, member ras oncogene family                                           | <i>Rab27b</i>                 | 3,56939698 | 3,28e-06 |
| Rar-related orphan receptor gamma                                            | <i>Rorc</i>                   | 3,56921269 | 3,34e-06 |
| Peroxisomal biogenesis factor 13                                             | <i>Pex13</i>                  | 3,56827028 | 7,42e-05 |
| Frizzled homolog 8 (drosophila)                                              | <i>Fzd8</i>                   | 3,56578204 | 1,40e-07 |
| Interleukin 1 receptor accessory protein                                     | <i>Il1rap</i>                 | 3,55698089 | 1,57e-05 |
| Selenium binding protein 1                                                   | <i>Selenbp1</i>               | 3,55530538 | 4,18e-06 |
| Paternally expressed 12                                                      | <i>Peg12</i>                  | 3,53526339 | 1,19e-08 |
| Complement component 1, s subcomponent 1                                     | <i>C1s1</i>                   | 3,53413627 | 1,24e-06 |
| Dnaj (hsp40) homolog, subfamily b, member 9                                  | <i>Dnajb9</i>                 | 3,51609552 | 7,98e-06 |

|                                                                                 |                            |            |            |
|---------------------------------------------------------------------------------|----------------------------|------------|------------|
| Lysm, putative peptidoglycan-binding, domain containing 2                       | <i>Lysmd2</i>              | 3,51595981 | 8,80e-07   |
| Solute carrier family 40 (iron-regulated transporter), member 1                 | <i>Slc40a1</i>             | 3,51111637 | 1,39e-06   |
| Receptor (tnfrsf)-interacting serine-threonine kinase 2                         | <i>Ripk2</i>               | 3,50395711 | 6,32e-08   |
| 3-hydroxybutyrate dehydrogenase, type 1                                         | <i>Bdh1</i>                | 3,49697997 | 1,07e-07   |
| Protein o-glucosyltransferase 1                                                 | <i>Poglut1</i>             | 3,4962652  | 2,74e-08   |
| Solute carrier family 6 (neurotransmitter transporter, betaine/gaba), member 12 | <i>Slc6a12</i>             | 3,48752769 | 3,85e-07   |
| Hemopoietic cell kinase                                                         | <i>Hck</i>                 | 3,4863987  | 3,67e-08   |
| Glucan (1,4-alpha-), branching enzyme 1                                         | <i>Gbe1</i>                | 3,48384681 | 0,00024892 |
| Brain expressed myelocytomatosis oncogene                                       | <i>Bmyc</i>                | 3,47744879 | 1,31e-06   |
| Kelch-like 24                                                                   | <i>Klhl24</i>              | 3,47479011 | 2,57e-05   |
| Interferon regulatory factor 9                                                  | <i>Irf9</i>                | 3,47260074 | 1,25e-07   |
| Solute carrier family 27 (fatty acid transporter), member 1                     | <i>Slc27a1</i>             | 3,46881447 | 4,47e-08   |
| Pleckstrin homology-like domain, family b, member 2                             | <i>Phldb2</i>              | 3,44361414 | 2,44e-07   |
| Dna segment, chr 1, erato doi 622, expressed                                    | <i>D1ertd622e</i>          | 3,43690909 | 1,62e-06   |
| Leucine rich repeat containing 16a                                              | <i>Lrrc16a</i>             | 3,43521192 | 6,09e-07   |
| Poly(rc) binding protein 4                                                      | <i>Pcbp4</i>               | 3,43118532 | 3,97e-05   |
| Cardiotrophin-like cytokine factor 1                                            | <i>Clcf1</i>               | 3,42953876 | 9,53e-07   |
| Toll-like receptor 3                                                            | <i>Tlr3</i>                | 3,42741558 | 2,19e-06   |
| Cyclin-dependent kinase 14                                                      | <i>Cdk14</i>               | 3,4221883  | 1,53e-06   |
| Neurofilament, medium polypeptide                                               | <i>Nefm</i>                | 3,42118372 | 4,90e-07   |
| Retinol dehydrogenase 5                                                         | <i>Rdh5</i>                | 3,41988669 | 2,04e-07   |
| Glutamic pyruvate transaminase (alanine aminotransferase) 2                     | <i>Gpt2</i>                | 3,40851839 | 8,75e-07   |
| Paired box 8                                                                    | <i>Pax8</i>                | 3,40809625 | 2,51e-07   |
| Mutl homolog 3 (e coli)                                                         | <i>Mlh3</i>                | 3,39951155 | 2,28e-07   |
| Low density lipoprotein receptor-related protein 4                              | <i>Lrp4</i>                | 3,3801029  | 2,36e-07   |
| Adp-ribosylation factor-like 4c                                                 | <i>Arl4c</i>               | 3,37791191 | 1,53e-08   |
| Peptidylprolyl isomerase c                                                      | <i>Ppic</i>                | 3,37605874 | 8,34e-08   |
| Histocompatibility 2, d region locus 1 ///                                      | <i>H2-d1 /// h2-k1 ///</i> | 3,37526569 | 4,53e-05   |
| histocompatibility 2, k1, k region /// h-2 class i                              | <i>loc101056305</i>        |            |            |
| histocompatibility antigen, k-d alpha chain-like                                |                            |            |            |
| Solute carrier family 25, member 33                                             | <i>Slc25a33</i>            | 3,36540332 | 1,28e-07   |

|                                                                                                               |                      |            |            |
|---------------------------------------------------------------------------------------------------------------|----------------------|------------|------------|
| 6-phosphofructo-2-kinase/fructose-2,6-biphosphatase 3                                                         | <i>Pfkfb3</i>        | 3,36473325 | 4,20e-06   |
| Phospholipid scramblase 2                                                                                     | <i>Plscr2</i>        | 3,36370998 | 8,34e-08   |
| Sarcoglycan, beta (dystrophin-associated glycoprotein)                                                        | <i>Sgcb</i>          | 3,35402339 | 9,81e-07   |
| Coiled-coil domain containing 80                                                                              | <i>Ccdc80</i>        | 3,35342464 | 1,92e-07   |
| Par-6 family cell polarity regulator beta                                                                     | <i>Pard6b</i>        | 3,35262801 | 1,15e-06   |
| Cd68 antigen                                                                                                  | <i>Cd68</i>          | 3,34380819 | 3,37e-07   |
| Prostate transmembrane protein, androgen induced 1                                                            | <i>Pmepa1</i>        | 3,33377725 | 3,99e-07   |
| Morn repeat containing 4                                                                                      | <i>Morn4</i>         | 3,32430948 | 1,45e-06   |
| Adp-ribosylation factor-like 14 effector protein                                                              | <i>Arl14ep</i>       | 3,31475996 | 7,87e-07   |
| Riken cdna 1700017b05 gene                                                                                    | <i>1700017b05rik</i> | 3,30968781 | 2,05e-07   |
| Lipoyltransferase 1                                                                                           | <i>Lipt1</i>         | 3,29863705 | 7,56e-08   |
| Carbonic anhydrase 5b, mitochondrial                                                                          | <i>Car5b</i>         | 3,2891462  | 9,35e-06   |
| Family with sequence similarity 195, member a                                                                 | <i>Fam195a</i>       | 3,28491931 | 3,98e-07   |
| Coproporphyrinogen oxidase                                                                                    | <i>Cpox</i>          | 3,28234478 | 5,31e-05   |
| Ribonuclease p 40 subunit                                                                                     | <i>Rpp40</i>         | 3,28102679 | 4,71e-07   |
| ATPase, aminophospholipid transporter (aplt), class i, type 8a, member 1                                      | <i>Atp8a1</i>        | 3,27982541 | 3,99e-06   |
| Sacsin                                                                                                        | <i>Sacs</i>          | 3,27851267 | 3,65e-07   |
| Riken cdna 6720475j19 gene                                                                                    | <i>6720475j19rik</i> | 3,27814744 | 3,99e-08   |
| B cell leukemia/lymphoma 3                                                                                    | <i>Bcl3</i>          | 3,26734691 | 6,48e-06   |
| Choline kinase alpha                                                                                          | <i>Chka</i>          | 3,26069212 | 9,30e-07   |
| Glutamate receptor, ionotropic, ampa1 (alpha 1)                                                               | <i>Gria1</i>         | 3,25935898 | 1,29e-05   |
| P21 protein (cdc42/rac)-activated kinase 3                                                                    | <i>Pak3</i>          | 3,25869648 | 3,22e-07   |
| Galactosidase, beta 1                                                                                         | <i>Glb1</i>          | 3,25512601 | 4,42e-07   |
| Interferon activated gene 202b                                                                                | <i>Ifi202b</i>       | 3,25221434 | 2,04e-07   |
| Muscle, skeletal, receptor tyrosine kinase                                                                    | <i>Musk</i>          | 3,25182016 | 1,74e-07   |
| Solute carrier family 1 (glutamate/neutral amino acid transporter), member 4                                  | <i>Slc1a4</i>        | 3,25024087 | 5,31e-05   |
| Nerve growth factor                                                                                           | <i>Ngf</i>           | 3,23570912 | 0,00387026 |
| St6 (alpha-n-acetyl-neuraminyl-2,3-beta-galactosyl-1,3)-n-acetylgalactosaminide alpha-2,6-sialyltransferase 4 | <i>St6galnac4</i>    | 3,23470962 | 5,93e-07   |
| Gamma-glutamyl hydrolase                                                                                      | <i>Ggh</i>           | 3,23452823 | 3,34e-06   |
| Sphingosine kinase 1                                                                                          | <i>Sphk1</i>         | 3,21869185 | 1,33e-06   |
| Microsomal triglyceride transfer protein                                                                      | <i>Mttp</i>          | 3,21433892 | 2,04e-06   |

|                                                                                                                          |                              |            |            |
|--------------------------------------------------------------------------------------------------------------------------|------------------------------|------------|------------|
| Enoyl coenzyme a hydratase domain containing 3                                                                           | <i>Echdc3</i>                | 3,21331464 | 1,48e-06   |
| Thiosulfate sulfurtransferase, mitochondrial                                                                             | <i>Tst</i>                   | 3,20709517 | 0,00011906 |
| Ribosomal protein l22                                                                                                    | <i>Rpl22</i>                 | 3,20510921 | 8,34e-08   |
| Myosin, light chain 10, regulatory                                                                                       | <i>Myl10</i>                 | 3,20213635 | 5,63e-06   |
| Branched chain ketoacid dehydrogenase e1, beta polypeptide                                                               | <i>Bckdhb</i>                | 3,20046427 | 1,35e-07   |
| Amyloid beta (a4) precursor protein                                                                                      | <i>App</i>                   | 3,19301325 | 5,30e-07   |
| Macro domain containing 1                                                                                                | <i>Macrocl1</i>              | 3,19032634 | 4,67e-07   |
| Wd repeat domain 77                                                                                                      | <i>Wdr77</i>                 | 3,1896369  | 8,78e-07   |
| Ribonuclease t2a /// ribonuclease t2b                                                                                    | <i>Rnaset2a /// rnaset2b</i> | 3,1895074  | 9,07e-07   |
| Glycoprotein m6b                                                                                                         | <i>Gpm6b</i>                 | 3,18354114 | 4,73e-05   |
| Plasminogen activator, tissue                                                                                            | <i>Plat</i>                  | 3,18163526 | 3,99e-06   |
| Riken cdna 1190002n15 gene                                                                                               | <i>1190002n15rik</i>         | 3,16957775 | 4,73e-06   |
| Endothelin converting enzyme 2                                                                                           | <i>Ece2</i>                  | 3,16159792 | 5,19e-08   |
| Muscle-related coiled-coil protein                                                                                       | <i>Murc</i>                  | 3,16051535 | 0,0001424  |
| Activating transcription factor 6                                                                                        | <i>Atf6</i>                  | 3,15634079 | 1,64e-07   |
| Mterf domain containing 2                                                                                                | <i>Mterfd2</i>               | 3,15041819 | 2,01e-07   |
| Quaking                                                                                                                  | <i>Qk</i>                    | 3,14762195 | 9,25e-05   |
| Dedicator of cytokinesis 5                                                                                               | <i>Dock5</i>                 | 3,14562283 | 8,81e-08   |
| Scleraxis                                                                                                                | <i>Scx</i>                   | 3,1423088  | 2,64e-06   |
| Glucuronyl c5-epimerase                                                                                                  | <i>Glc</i>                   | 3,14180309 | 8,81e-08   |
| Guanine nucleotide binding protein (g protein), gamma 2                                                                  | <i>Gng2</i>                  | 3,13827653 | 2,40e-05   |
| Threonine synthase-like 1 (bacterial)                                                                                    | <i>Thnsl1</i>                | 3,13727069 | 9,71e-06   |
| Late cornified envelope 1i                                                                                               | <i>Lce1i</i>                 | 3,13717994 | 4,01e-05   |
| Tripartite motif-containing 30a                                                                                          | <i>Trim30a</i>               | 3,13158889 | 6,44e-06   |
| N-acyl ethanolamine acid amidase                                                                                         | <i>Naaa</i>                  | 3,11691892 | 5,16e-07   |
| Riken cdna 4930529m08 gene                                                                                               | <i>4930529m08rik</i>         | 3,11522518 | 0,00055958 |
| Cathepsin b                                                                                                              | <i>Ctsb</i>                  | 3,11261178 | 4,86e-07   |
| Aldehyde dehydrogenase family 6, subfamily a1                                                                            | <i>Aldh6a1</i>               | 3,10431153 | 7,27e-06   |
| Prolactin family 7, subfamily c, member 1                                                                                | <i>Prl7c1</i>                | 3,10278465 | 6,32e-07   |
| Translocation associated membrane protein 1-like 1                                                                       | <i>Tram1l1</i>               | 3,10160163 | 4,92e-05   |
| O-linked n-acetylglucosamine (glcnac) transferase (udp-n-acetylglucosamine:polypeptide-n-acetylglucosaminyl transferase) | <i>Ogt</i>                   | 3,08817319 | 0,00027753 |
| A disintegrin-like and metalloproteinase (repolysin type) with thrombospondin type 1 motif, 1                            | <i>Adamts1</i>               | 3,08706911 | 3,08e-06   |
| Ectonucleotide pyrophosphatase/phosphodiesterase                                                                         | <i>Enpp2</i>                 | 3,08578802 | 5,41e-06   |



|                                                                                   |                      |            |            |
|-----------------------------------------------------------------------------------|----------------------|------------|------------|
| 2                                                                                 |                      |            |            |
| Chloride channel 2                                                                | <i>Clcn2</i>         | 3,08466751 | 1,69e-05   |
| Ring finger protein 149                                                           | <i>Rnf149</i>        | 3,08443128 | 8,95e-07   |
| Sel-1 suppressor of lin-12-like (c. Elegans)                                      | <i>Sel1l</i>         | 3,08351488 | 5,58e-07   |
| Eh-domain containing 4                                                            | <i>Ehd4</i>          | 3,07214324 | 3,44e-08   |
| Interferon gamma inducible protein 30                                             | <i>Ifi30</i>         | 3,05624769 | 6,46e-08   |
| Acyl-coa thioesterase 2                                                           | <i>Acot2</i>         | 3,05497296 | 1,38e-07   |
| Tsc22 domain family, member 3                                                     | <i>Tsc22d3</i>       | 3,05364514 | 3,53e-06   |
| Riken cdna 1110012l19 gene                                                        | <i>1110012l19rik</i> | 3,05164766 | 3,89e-07   |
| Coagulation factor ii (thrombin) receptor                                         | <i>F2r</i>           | 3,04856525 | 9,21e-07   |
| Deiodinase, iodothyronine, type ii                                                | <i>Dio2</i>          | 3,04842407 | 1,03e-06   |
| Paired box 3                                                                      | <i>Pax3</i>          | 3,04334969 | 7,35e-05   |
| Heat shock protein family b (small), member 11                                    | <i>Hspb11</i>        | 3,02304472 | 4,85e-07   |
| Protein tyrosine phosphatase, non-receptor type 2                                 | <i>Ptpn2</i>         | 3,02139087 | 1,20e-05   |
| Stt3, subunit of the oligosaccharyltransferase complex, homolog a (s. Cerevisiae) | <i>Stt3a</i>         | 3,01966253 | 6,41e-05   |
| Cysteine rich protein 2                                                           | <i>Crip2</i>         | 3,00898743 | 5,94e-06   |
| Mannosidase 2, alpha b2                                                           | <i>Man2b2</i>        | 3,00820029 | 3,31e-05   |
| Ccr4 carbon catabolite repression 4-like (s. Cerevisiae)                          | <i>Ccrn4l</i>        | 3,00491129 | 8,75e-07   |
| Gamma-glutamyl cyclotransferase                                                   | <i>Ggct</i>          | 3,00165539 | 6,32e-07   |
| G patch domain containing 4                                                       | <i>Gpatch4</i>       | 2,9957431  | 4,25e-06   |
| Calpain 5                                                                         | <i>Capn5</i>         | 2,99537549 | 8,33e-07   |
| Selenoprotein p, plasma, 1                                                        | <i>Sepp1</i>         | 2,99368752 | 2,98e-07   |
| Sortilin 1                                                                        | <i>Sort1</i>         | 2,98887141 | 3,98e-06   |
| Metastasis associated lung adenocarcinoma transcript 1 (non-coding rna)           | <i>Malat1</i>        | 2,98682629 | 0,000981   |
| Family with sequence similarity 32, member a                                      | <i>Fam32a</i>        | 2,98434992 | 9,40e-06   |
| Napsin a aspartic peptidase                                                       | <i>Napsa</i>         | 2,97450165 | 1,38e-05   |
| Tsr2 20s rrna accumulation                                                        | <i>Tsr2</i>          | 2,97349982 | 2,01e-07   |
| Prune homolog (drosophila)                                                        | <i>Prune</i>         | 2,95923225 | 0,00024039 |
| Retinoblastoma binding protein 6                                                  | <i>Rbbp6</i>         | 2,94665756 | 6,50e-06   |
| Rho/rac guanine nucleotide exchange factor (gef) 2                                | <i>Arhgef2</i>       | 2,94625288 | 1,93e-06   |
| D-tyrosyl-trna deacylase 1                                                        | <i>Dtd1</i>          | 2,94526632 | 6,87e-08   |
| Kruppel-like factor 9                                                             | <i>Klf9</i>          | 2,94029177 | 2,72e-07   |
| Glutathione s-transferase, mu 5                                                   | <i>Gstm5</i>         | 2,9377689  | 3,89e-07   |
| Myosin viia                                                                       | <i>Myo7a</i>         | 2,927515   | 1,49e-06   |
| Methylmalonyl coa epimerase                                                       | <i>Mcee</i>          | 2,92656715 | 1,18e-06   |

|                                                                                                              |                                   |            |            |
|--------------------------------------------------------------------------------------------------------------|-----------------------------------|------------|------------|
| Secernin 3                                                                                                   | <i>Scrn3</i>                      | 2,92482854 | 2,83e-05   |
| Cdna sequence bc022960                                                                                       | <i>Bc022960</i>                   | 2,92298735 | 7,20e-05   |
| Prkc, apoptosis, wt1, regulator                                                                              | <i>Pawr</i>                       | 2,9215201  | 2,99e-05   |
| Ddb1 and cul4 associated factor 8                                                                            | <i>Dcaf8</i>                      | 2,92061564 | 4,42e-07   |
| 3-hydroxyisobutyryl-coenzyme a hydrolase                                                                     | <i>Hibch</i>                      | 2,91022766 | 0,0002902  |
| Predicted gene 3776 /// glutathione s-transferase, alpha 1 (ya) /// glutathione s-transferase, alpha 2 (yc2) | <i>Gm3776 /// gsta1 /// gsta2</i> | 2,9040713  | 2,42e-06   |
| Gap junction protein, beta 3                                                                                 | <i>Gjb3</i>                       | 2,89798803 | 6,46e-06   |
| Phosphoserine phosphatase                                                                                    | <i>Psph</i>                       | 2,89588686 | 7,89e-08   |
| Signal transducer and activator of transcription 5a                                                          | <i>Stat5a</i>                     | 2,89401742 | 0,00028721 |
| Platelet-derived growth factor, c polypeptide                                                                | <i>Pdgfc</i>                      | 2,88829067 | 6,33e-07   |
| Ependymin related protein 1 (zebrafish)                                                                      | <i>Epdr1</i>                      | 2,88230431 | 0,00041264 |
| Glucocorticoid induced transcript 1                                                                          | <i>Glcci1</i>                     | 2,8798497  | 9,64e-07   |
| Cubilin (intrinsic factor-cobalamin receptor)                                                                | <i>Cubn</i>                       | 2,87973839 | 9,74e-07   |
| Phosphatase, orphan 2                                                                                        | <i>Phospho2</i>                   | 2,8785443  | 7,75e-06   |
| Oxidative stress induced growth inhibitor family member 2                                                    | <i>Osgin2</i>                     | 2,87313337 | 8,70e-07   |
| Chondroitin polymerizing factor                                                                              | <i>Chpf</i>                       | 2,87038715 | 9,19e-07   |
| Spo11 meiotic protein covalently bound to dsb homolog (s. Cerevisiae)                                        | <i>Spo11</i>                      | 2,86837947 | 0,00025069 |
| Acyl-coa thioesterase 6                                                                                      | <i>Acot6</i>                      | 2,86669295 | 2,18e-07   |
| Acyl-coa synthetase bubblegum family member 1                                                                | <i>Acsbg1</i>                     | 2,86445981 | 1,72e-06   |
| Ribosomal protein s6                                                                                         | <i>Rps6</i>                       | 2,85667982 | 2,74e-07   |
| Neural cell adhesion molecule 1                                                                              | <i>Ncam1</i>                      | 2,85304324 | 2,59e-05   |
| Thyroid hormone receptor interactor 12                                                                       | <i>Trip12</i>                     | 2,84867324 | 4,12e-07   |
| Influenza virus ns1a binding protein                                                                         | <i>Ivns1abp</i>                   | 2,84852316 | 8,35e-06   |
| Growth differentiation factor 15                                                                             | <i>Gdf15</i>                      | 2,84555765 | 4,27e-07   |
| Mannosidase, beta a, lysosomal                                                                               | <i>Manba</i>                      | 2,84355119 | 0,00012483 |
| Cugbp, elav-like family member 1                                                                             | <i>Celf1</i>                      | 2,83782906 | 6,26e-07   |
| Phosphoribosyl pyrophosphate synthetase 1-like 3                                                             | <i>Prps1l3</i>                    | 2,83450732 | 1,30e-06   |
| Hairy/enhancer-of-split related with yrpw motif 1                                                            | <i>Hey1</i>                       | 2,8328213  | 3,87e-07   |
| Predicted gene 1976                                                                                          | <i>Gm1976</i>                     | 2,82802051 | 1,78e-05   |
| Annexin a4                                                                                                   | <i>Anxa4</i>                      | 2,8270422  | 9,97e-07   |
| Fidgetin                                                                                                     | <i>Fign</i>                       | 2,81549148 | 1,75e-05   |
| Prostaglandin reductase 1                                                                                    | <i>Ptgr1</i>                      | 2,8089211  | 7,82e-07   |
| Fatty acid binding protein 5, epidermal                                                                      | <i>Fabp5</i>                      | 2,80888333 | 8,97e-07   |
| Blood vessel epicardial substance                                                                            | <i>Bves</i>                       | 2,80513657 | 9,53e-06   |

|                                                                                  |                          |            |            |
|----------------------------------------------------------------------------------|--------------------------|------------|------------|
| Cytochrome p450, family 4, subfamily v, polypeptide 3                            | <i>Cyp4v3</i>            | 2,80172871 | 4,48e-06   |
| Zinc finger protein 62                                                           | <i>Zfp62</i>             | 2,80060101 | 2,68e-05   |
| 4-aminobutyrate aminotransferase                                                 | <i>Abat</i>              | 2,7956161  | 6,89e-06   |
| Histocompatibility 2, m region locus 3                                           | <i>H2-m3</i>             | 2,79365066 | 2,87e-05   |
| Pyrroline-5-carboxylate reductase 1                                              | <i>Pycr1</i>             | 2,7901965  | 1,38e-06   |
| Ubx domain protein 4                                                             | <i>Ubxn4</i>             | 2,78880095 | 1,73e-06   |
| B cell cll/lymphoma 9                                                            | <i>Bcl9</i>              | 2,7834666  | 0,00100405 |
| Rab9 effector protein with kelch motifs                                          | <i>Rabepk</i>            | 2,78280705 | 2,22e-06   |
| Acyl-coenzyme a dehydrogenase family, member 11                                  | <i>Acad11</i>            | 2,78222739 | 1,99e-05   |
| Run and sh3 domain containing 1                                                  | <i>Rusc1</i>             | 2,78082112 | 0,00015667 |
| Polo-like kinase 2                                                               | <i>Plk2</i>              | 2,77787331 | 2,16e-07   |
| Dna topoisomerase 1, mitochondrial                                               | <i>Top1mt</i>            | 2,77736473 | 2,12e-06   |
| Paroxysmal nonkinesigenic dyskinesia                                             | <i>Pnkd</i>              | 2,77713557 | 1,54e-05   |
| Dna segment, chr 16, erato doi 472, expressed                                    | <i>D16ertd472e</i>       | 2,77557691 | 1,92e-06   |
| Forkhead box c1                                                                  | <i>Foxc1</i>             | 2,77400899 | 5,30e-07   |
| Carbonic anhydrase 6                                                             | <i>Car6</i>              | 2,77231373 | 1,38e-05   |
| Glutamate-rich wd repeat containing 1                                            | <i>Grwd1</i>             | 2,76760665 | 7,60e-07   |
| Vesicle-associated membrane protein 4                                            | <i>Vamp4</i>             | 2,7666147  | 3,00e-06   |
| Cd99 antigen-like 2                                                              | <i>Cd99l2</i>            | 2,76453261 | 6,06e-07   |
| Opioid growth factor receptor-like 1                                             | <i>Ogfrl1</i>            | 2,75940426 | 1,26e-05   |
| Start domain containing 10                                                       | <i>Stard10</i>           | 2,7592835  | 2,34e-06   |
| Wd repeat containing planar cell polarity effector                               | <i>Wdpcp</i>             | 2,75369433 | 9,20e-06   |
| Tumor protein d52-like 1                                                         | <i>Tpd52l1</i>           | 2,74959564 | 5,05e-07   |
| G protein-coupled receptor 137b                                                  | <i>Gpr137b</i>           | 2,74907096 | 3,66e-07   |
| Apolipoprotein l 9a /// apolipoprotein l 9b                                      | <i>Apol9a /// apol9b</i> | 2,74333374 | 2,27e-06   |
| 2-4-dienoyl-coenzyme a reductase 2, peroxisomal                                  | <i>Decr2</i>             | 2,7424251  | 3,75e-06   |
| Solute carrier family 12, member 7                                               | <i>Slc12a7</i>           | 2,73339258 | 5,10e-07   |
| Transmembrane protein 132a                                                       | <i>Tmem132a</i>          | 2,73319489 | 1,59e-06   |
| Actin related protein 2/3 complex, subunit 5-like                                | <i>Arpc5l</i>            | 2,7296185  | 3,46e-07   |
| Citrate lyase beta like                                                          | <i>Clybl</i>             | 2,72684514 | 7,24e-05   |
| Solute carrier family 16 (monocarboxylic acid transporters), member 2            | <i>Slc16a2</i>           | 2,72407292 | 2,27e-05   |
| Dipeptidylpeptidase 6                                                            | <i>Dpp6</i>              | 2,72398818 | 1,59e-05   |
| Immunity-related gtpase family m member 2                                        | <i>Irgm2</i>             | 2,71880953 | 1,35e-05   |
| Queueine trna-ribosyltransferase domain containing 1                             | <i>Qtrtd1</i>            | 2,70863427 | 0,00807268 |
| Sema domain, immunoglobulin domain (ig), tm domain, and short cytoplasmic domain | <i>Sema4f</i>            | 2,70567103 | 3,56e-05   |

|                                                         |                                |            |            |
|---------------------------------------------------------|--------------------------------|------------|------------|
| Allograft inflammatory factor 1-like                    | <i>Aif1l</i>                   | 2,70554214 | 1,55e-05   |
| Phospholipase d1                                        | <i>Pld1</i>                    | 2,70270471 | 2,66e-07   |
| Aldehyde dehydrogenase family 1, subfamily a3           | <i>Aldh1a3</i>                 | 2,70249863 | 1,40e-06   |
| Seryl-aminoacyl-trna synthetase                         | <i>Sars</i>                    | 2,70017508 | 2,53e-06   |
| Galactokinase 2                                         | <i>Galk2</i>                   | 2,69731801 | 6,12e-05   |
| Histone cluster 1, h2bc /// histone cluster 1, h2be /// | <i>Hist1h2bc ///</i>           | 2,69586172 | 1,34e-07   |
| histone cluster 1, h2bf /// histone cluster 1, h2bg /// | <i>hist1h2be ///</i>           |            |            |
| histone cluster 1, h2bj /// histone cluster 1, h2bl /// | <i>hist1h2bf ///</i>           |            |            |
| histone cluster 1, h2bm /// histone cluster 1, h2bn /// | <i>hist1h2bg ///</i>           |            |            |
| histone cluster 1, h2bp /// histone cluster 1, h2bq /// | <i>hist1h2bj ///</i>           |            |            |
| histone cluster 1 h2br                                  | <i>hist1h2bl ///</i>           |            |            |
|                                                         | <i>hist1h2bm ///</i>           |            |            |
|                                                         | <i>hist1h2bn ///</i>           |            |            |
|                                                         | <i>hist1h2bp ///</i>           |            |            |
|                                                         | <i>hist1h2bq ///</i>           |            |            |
|                                                         | <i>hist1h2br</i>               |            |            |
| Zinc and ring finger 1                                  | <i>Znrf1</i>                   | 2,69286164 | 2,67e-05   |
| Cathepsin z                                             | <i>Ctsz</i>                    | 2,68907963 | 1,70e-07   |
| Zinc finger protein 566                                 | <i>Zfp566</i>                  | 2,68801779 | 1,81e-06   |
| Melanoma cell adhesion molecule                         | <i>Mcam</i>                    | 2,68757359 | 3,63e-05   |
| Yippee-like 3 (drosophila)                              | <i>Ypel3</i>                   | 2,68535863 | 1,64e-06   |
| 3-phosphoglycerate dehydrogenase pseudogene ///         | <i>Gm8096 ///</i> <i>phgdh</i> | 2,68197111 | 8,42e-08   |
| 3-phosphoglycerate dehydrogenase                        |                                |            |            |
| Activating transcription factor 3                       | <i>Atf3</i>                    | 2,68127776 | 9,33e-07   |
| Methyltransferase like 22                               | <i>Mettl22</i>                 | 2,67791009 | 4,36e-06   |
| Follistatin                                             | <i>Fst</i>                     | 2,67682158 | 5,07e-07   |
| Solute carrier family 35, member f5                     | <i>Slc35f5</i>                 | 2,67427956 | 2,34e-07   |
| Aryl-hydrocarbon receptor                               | <i>Ahr</i>                     | 2,67424666 | 6,29e-05   |
| Four jointed box 1 (drosophila)                         | <i>Fjx1</i>                    | 2,67364993 | 9,17e-05   |
| Inhibitor of kappab kinase epsilon                      | <i>Ikbke</i>                   | 2,67364459 | 7,57e-06   |
| Suppressor of cytokine signaling 6                      | <i>Socs6</i>                   | 2,67266604 | 0,00015311 |
| Riken cdna 1110058l19 gene                              | <i>1110058l19rik</i>           | 2,66836568 | 8,64e-07   |
| Single-stranded dna binding protein 2                   | <i>Ssbp2</i>                   | 2,66739218 | 2,36e-07   |
| Peroxisome proliferative activated receptor, gamma,     | <i>Ppargc1b</i>                | 2,65839542 | 5,16e-07   |
| coactivator 1 beta                                      |                                |            |            |
| Cyclin h                                                | <i>Ccnh</i>                    | 2,65617129 | 4,17e-06   |
| Protein phosphatase 1, regulatory (inhibitor) subunit   | <i>Ppp1r15a</i>                | 2,65163814 | 9,16e-07   |
| 15a                                                     |                                |            |            |

|                                                                                                   |                       |            |            |
|---------------------------------------------------------------------------------------------------|-----------------------|------------|------------|
| Riken cdna 1700019g17 gene                                                                        | <i>1700019g17rik</i>  | 2,64502272 | 6,44e-06   |
| Nucleobindin 2                                                                                    | <i>Nucb2</i>          | 2,6427909  | 1,76e-06   |
| Latent transforming growth factor beta binding protein 3                                          | <i>Ltbp3</i>          | 2,63906687 | 6,24e-07   |
| Necdin-like 2                                                                                     | <i>Ndn12</i>          | 2,63886079 | 6,01e-07   |
| Predicted gene 13139                                                                              | <i>Gm13139</i>        | 2,63826919 | 1,00e-06   |
| Calcium channel, voltage-dependent, p/q type, alpha 1a subunit                                    | <i>Cacna1a</i>        | 2,63776007 | 2,35e-06   |
| Tryptophanyl-trna synthetase                                                                      | <i>Wars</i>           | 2,63764892 | 6,37e-06   |
| Rab20, member ras oncogene family                                                                 | <i>Rab20</i>          | 2,63635187 | 9,36e-06   |
| Fibrillin 1                                                                                       | <i>Fbn1</i>           | 2,62876191 | 8,52e-06   |
| Sclerostin domain containing 1                                                                    | <i>Sostdc1</i>        | 2,62779123 | 1,06e-05   |
| Pseudouridine synthase 3                                                                          | <i>Pus3</i>           | 2,62371375 | 1,55e-05   |
| Pleckstrin                                                                                        | <i>Plek</i>           | 2,61955615 | 0,00106339 |
| Fibulin 2                                                                                         | <i>Fbln2</i>          | 2,61924348 | 1,28e-07   |
| Nadh dehydrogenase (ubiquinone) 1 alpha subcomplex, assembly factor 4                             | <i>Ndufaf4</i>        | 2,61487042 | 1,07e-06   |
| Swi/snf related, matrix associated, actin dependent regulator of chromatin, subfamily d, member 3 | <i>Smarcd3</i>        | 2,61432352 | 2,04e-06   |
| Integrin beta 5                                                                                   | <i>Itgb5</i>          | 2,61365332 | 8,89e-07   |
| Udp-glucose ceramide glucosyltransferase                                                          | <i>Ugcg</i>           | 2,61091338 | 3,37e-06   |
| Serine (or cysteine) peptidase inhibitor, clade e, member 1                                       | <i>Serpine1</i>       | 2,60592534 | 2,69e-07   |
| Peroxisomal trans-2-enoyl-coa reductase                                                           | <i>Pecr</i>           | 2,6056587  | 1,49e-06   |
| Tetratricopeptide repeat domain 30b                                                               | <i>Ttc30b</i>         | 2,60140648 | 0,00196444 |
| Transmembrane protein 121                                                                         | <i>Tmem121</i>        | 2,59640051 | 1,46e-06   |
| Leukemia inhibitory factor                                                                        | <i>Lif</i>            | 2,59404635 | 1,51e-05   |
| Multivesicular body subunit 12b                                                                   | <i>Mvb12b</i>         | 2,59105499 | 2,42e-07   |
| Phospholipase d family, member 3                                                                  | <i>Pld3</i>           | 2,58425815 | 8,03e-07   |
| Nemo like kinase                                                                                  | <i>Nlk</i>            | 2,58170589 | 2,10e-06   |
| H19, imprinted maternally expressed transcript /// microRNA 675                                   | <i>H19 /// mir675</i> | 2,57831655 | 5,77e-06   |
| Rhomboid domain containing 1                                                                      | <i>Rhbdd1</i>         | 2,57751687 | 2,24e-07   |
| Cytochrome c oxidase subunit via polypeptide 2                                                    | <i>Cox6a2</i>         | 2,57697677 | 6,08e-06   |
| Thioesterase superfamily member 4                                                                 | <i>Them4</i>          | 2,57576429 | 1,75e-05   |
| Ubiquitin prenyltransferase domain containing 1                                                   | <i>Ubiad1</i>         | 2,57349797 | 1,49e-06   |
| 3-phosphoglycerate dehydrogenase                                                                  | <i>Phgdh</i>          | 2,5734408  | 1,89e-07   |
| Fyn proto-oncogene                                                                                | <i>Fyn</i>            | 2,5679522  | 2,78e-06   |

|                                                                                                                                                                                                         |                                                                                                         |            |            |
|---------------------------------------------------------------------------------------------------------------------------------------------------------------------------------------------------------|---------------------------------------------------------------------------------------------------------|------------|------------|
| Dead (asp-glu-ala-asp) box polypeptide 18                                                                                                                                                               | <i>Ddx18</i>                                                                                            | 2,56475856 | 2,72e-05   |
| Transmembrane protein 123                                                                                                                                                                               | <i>Tmem123</i>                                                                                          | 2,56464201 | 2,72e-06   |
| Creb3 regulatory factor                                                                                                                                                                                 | <i>Crebrf</i>                                                                                           | 2,55920941 | 5,16e-07   |
| Keratin 80                                                                                                                                                                                              | <i>Krt80</i>                                                                                            | 2,55911558 | 5,66e-06   |
| Ras p21 protein activator 4                                                                                                                                                                             | <i>Rasa4</i>                                                                                            | 2,55499509 | 5,55e-07   |
| Aldo-keto reductase family 1, member e1                                                                                                                                                                 | <i>Akr1e1</i>                                                                                           | 2,55447856 | 3,64e-06   |
| Melanoma antigen, family a, 1 /// melanoma antigen, family a, 2 /// melanoma antigen, family a, 3 /// melanoma antigen, family a, 5 /// melanoma antigen, family a, 6 /// melanoma antigen, family a, 8 | <i>Magea1</i> /// <i>magea2</i> /// <i>magea3</i> /// <i>magea5</i> /// <i>magea6</i> /// <i>magea8</i> | 2,55242949 | 5,21e-05   |
| Interferon gamma receptor 2                                                                                                                                                                             | <i>Ifngr2</i>                                                                                           | 2,5477434  | 7,09e-07   |
| Purinergic receptor p2x, ligand-gated ion channel 4                                                                                                                                                     | <i>P2rx4</i>                                                                                            | 2,54548995 | 0,00036758 |
| Taxilin gamma                                                                                                                                                                                           | <i>Txlng</i>                                                                                            | 2,54199559 | 0,00026162 |
| Tensin 1                                                                                                                                                                                                | <i>Tns1</i>                                                                                             | 2,54043416 | 9,34e-06   |
| Galactosidase, alpha                                                                                                                                                                                    | <i>Gla</i>                                                                                              | 2,53854266 | 1,40e-07   |
| Coronin, actin binding protein, 2b                                                                                                                                                                      | <i>Coro2b</i>                                                                                           | 2,53728245 | 0,00045757 |
| Fucosidase, alpha-l- 2, plasma                                                                                                                                                                          | <i>Fuca2</i>                                                                                            | 2,53503139 | 5,49e-07   |
| N-acetyltransferase 2 (arylamine n-acetyltransferase)                                                                                                                                                   | <i>Nat2</i>                                                                                             | 2,53305264 | 0,00034849 |
| Sh3-domain binding protein 5 (btk-associated)                                                                                                                                                           | <i>Sh3bp5</i>                                                                                           | 2,5327384  | 3,20e-05   |
| Chaperonin containing tcp1, subunit 4 (delta)                                                                                                                                                           | <i>Cct4</i>                                                                                             | 2,53266596 | 0,00016874 |
| Pleckstrin homology domain containing, family o member 1                                                                                                                                                | <i>Plekho1</i>                                                                                          | 2,53000979 | 8,90e-06   |
| Guanylate binding protein 2                                                                                                                                                                             | <i>Gbp2</i>                                                                                             | 2,5256308  | 8,20e-05   |
| Tea domain family member 2                                                                                                                                                                              | <i>Tead2</i>                                                                                            | 2,52465518 | 2,77e-06   |
| Dipeptidylpeptidase 8                                                                                                                                                                                   | <i>Dpp8</i>                                                                                             | 2,52216309 | 0,00293086 |
| Serine/threonine kinase 39                                                                                                                                                                              | <i>Stk39</i>                                                                                            | 2,52053006 | 2,38e-05   |
| Glucosidase, beta, acid                                                                                                                                                                                 | <i>Gba</i>                                                                                              | 2,51972857 | 1,37e-06   |
| Ras association (ralgds/af-6) domain family member 5                                                                                                                                                    | <i>Rassf5</i>                                                                                           | 2,51801535 | 3,22e-05   |
| Fk506 binding protein-like                                                                                                                                                                              | <i>Fkbp1</i>                                                                                            | 2,51021301 | 9,56e-07   |
| Histone cluster 1, h1c                                                                                                                                                                                  | <i>Hist1h1c</i>                                                                                         | 2,50989039 | 8,29e-05   |
| Placental growth factor                                                                                                                                                                                 | <i>Pgf</i>                                                                                              | 2,50915782 | 2,25e-05   |
| Steap family member 4                                                                                                                                                                                   | <i>Steap4</i>                                                                                           | 2,50753277 | 1,20e-06   |
| Tumor protein d52                                                                                                                                                                                       | <i>Tpd52</i>                                                                                            | 2,50684123 | 1,96e-07   |
| Prostaglandin f receptor                                                                                                                                                                                | <i>Ptgfr</i>                                                                                            | 2,50664028 | 2,55e-05   |
| Ero1-like (s. Cerevisiae)                                                                                                                                                                               | <i>Ero1l</i>                                                                                            | 2,50650093 | 2,36e-07   |
| Insulin-like growth factor binding protein 3                                                                                                                                                            | <i>Igfbp3</i>                                                                                           | 2,50432685 | 7,46e-06   |
| Lim domain only 1                                                                                                                                                                                       | <i>Lmo1</i>                                                                                             | 2,50423054 | 1,24e-06   |

|                                                             |                          |            |            |
|-------------------------------------------------------------|--------------------------|------------|------------|
| G protein-coupled receptor associated sorting protein 1     | <i>Gprasp1</i>           | 2,50235514 | 1,07e-06   |
| Caspase 7                                                   | <i>Casp7</i>             | 2,50200962 | 1,56e-06   |
| Ccaat/enhancer binding protein (c/ebp), beta                | <i>Cebpb</i>             | 2,49886413 | 4,10e-05   |
| Rho guanine nucleotide exchange factor (gef) 5              | <i>Arhgef5</i>           | 2,4985319  | 2,36e-06   |
| Host cell factor c1 regulator 1 (xpo1-dependent)            | <i>Hcfc1r1</i>           | 2,49694206 | 2,72e-06   |
| Regulator of g-protein signaling 4                          | <i>Rgs4</i>              | 2,495675   | 8,62e-07   |
| Nuclear factor, erythroid derived 2, like 2                 | <i>Nfe2l2</i>            | 2,49393364 | 3,10e-05   |
| Synaptosomal-associated protein, 47                         | <i>Snap47</i>            | 2,48950369 | 9,53e-07   |
| Isovaleryl coenzyme a dehydrogenase                         | <i>Ivd</i>               | 2,48946452 | 2,91e-06   |
| Mannan-binding lectin serine peptidase 1                    | <i>Masp1</i>             | 2,48345524 | 7,00e-05   |
| Solute carrier family 25, member 37                         | <i>Slc25a37</i>          | 2,48302841 | 1,79e-06   |
| Ubiquitin-conjugating enzyme e2d 3                          | <i>Ube2d3</i>            | 2,48164883 | 1,36e-05   |
| Transmembrane protein 53                                    | <i>Tmem53</i>            | 2,47875979 | 9,66e-07   |
| Podocalyxin-like                                            | <i>Podxl</i>             | 2,47494918 | 2,56e-05   |
| Ribosomal protein l5 /// ribosomal protein l5, pseudogene 2 | <i>Rpl5 /// rpl5-ps2</i> | 2,47411582 | 5,04e-07   |
| Acyl-coenzyme a dehydrogenase family, member 10             | <i>Acad10</i>            | 2,46945088 | 2,32e-07   |
| Phospholipase a2, group xv                                  | <i>Pla2g15</i>           | 2,4682578  | 3,88e-07   |
| Fast kinase domains 1                                       | <i>Fastkd1</i>           | 2,46604312 | 7,69e-06   |
| Zinc finger protein 639                                     | <i>Zfp639</i>            | 2,46302251 | 1,07e-07   |
| Chitinase, di-n-acetyl-                                     | <i>Ctbs</i>              | 2,46192255 | 7,82e-05   |
| Beta-1,4-n-acetyl-galactosaminyl transferase 1              | <i>B4galnt1</i>          | 2,46156038 | 4,10e-06   |
| Nicotinamide n-methyltransferase                            | <i>Nnmt</i>              | 2,45930379 | 5,66e-06   |
| Otu domain, ubiquitin aldehyde binding 2                    | <i>Otub2</i>             | 2,45912031 | 4,65e-06   |
| Myozenin 2                                                  | <i>Myoz2</i>             | 2,45585984 | 1,04e-06   |
| Heparan sulfate 6-o-sulfotransferase 1                      | <i>Hs6st1</i>            | 2,45253686 | 0,0003961  |
| Alcohol dehydrogenase, iron containing, 1                   | <i>Adhfe1</i>            | 2,44956172 | 9,75e-06   |
| Guanine nucleotide binding protein, alpha o                 | <i>Gnao1</i>             | 2,44852583 | 0,00016926 |
| Tgfb-induced factor homeobox 1                              | <i>Tgif1</i>             | 2,44721353 | 1,52e-06   |
| Unc-13 homolog b (c. Elegans)                               | <i>Unc13b</i>            | 2,44357062 | 5,24e-05   |
| S100 calcium binding protein a1                             | <i>S100a1</i>            | 2,44193103 | 5,27e-05   |
| Radical s-adenosyl methionine domain containing 2           | <i>Rsad2</i>             | 2,44098351 | 8,49e-05   |
| Branched chain aminotransferase 2, mitochondrial            | <i>Bcat2</i>             | 2,43711922 | 3,06e-06   |
| Ski-like                                                    | <i>Skil</i>              | 2,43696615 | 2,34e-07   |
| Guanylate binding protein 3                                 | <i>Gbp3</i>              | 2,43431924 | 1,31e-05   |
| Clock interacting protein, circadian                        | <i>Cipc</i>              | 2,43424439 | 2,67e-07   |
| Splicing factor 3b, subunit 1                               | <i>Sf3b1</i>             | 2,43247355 | 2,81e-05   |

|                                                                            |                         |            |            |
|----------------------------------------------------------------------------|-------------------------|------------|------------|
| Unc-119 homolog (c. Elegans)                                               | <i>Unc119</i>           | 2,42696093 | 1,28e-06   |
| Dapper homolog 1, antagonist of beta-catenin (xenopus)                     | <i>Dact1</i>            | 2,42611057 | 1,27e-05   |
| Deoxynucleotidyltransferase, terminal, interacting protein 2               | <i>Dnttip2</i>          | 2,42528222 | 2,18e-05   |
| Poly (a) polymerase alpha                                                  | <i>Papola</i>           | 2,42438734 | 1,01e-05   |
| 5-hydroxytryptamine (serotonin) receptor 2b                                | <i>Htr2b</i>            | 2,42340699 | 1,95e-05   |
| Brca1/brca2-containing complex, subunit 3                                  | <i>Brcc3</i>            | 2,42220081 | 0,00193485 |
| Sh3-domain grb2-like b1 (endophilin)                                       | <i>Sh3glb1</i>          | 2,42169348 | 3,58e-05   |
| Wd repeat domain 45                                                        | <i>Wdr45</i>            | 2,41982784 | 4,42e-07   |
| Zinc finger homeobox 3                                                     | <i>Zfx3</i>             | 2,41773875 | 0,00134991 |
| Growth hormone inducible transmembrane protein                             | <i>Ghitm</i>            | 2,41485734 | 2,79e-06   |
| Hexose-6-phosphate dehydrogenase (glucose 1-dehydrogenase)                 | <i>H6pd</i>             | 2,41288039 | 2,31e-06   |
| Solute carrier family 19 (folate transporter), member 1                    | <i>Slc19a1</i>          | 2,40894865 | 7,87e-07   |
| Ptk7 protein tyrosine kinase 7                                             | <i>Ptk7</i>             | 2,40862646 | 2,24e-07   |
| Sterile alpha motif domain containing 8                                    | <i>Samd8</i>            | 2,4075565  | 3,33e-06   |
| Phospholipase a2, group xvi                                                | <i>Pla2g16</i>          | 2,40739254 | 2,40e-06   |
| Non-catalytic region of tyrosine kinase adaptor protein 1                  | <i>Nck1</i>             | 2,40635702 | 9,31e-06   |
| Ribonuclease p 14 subunit                                                  | <i>Rpp14</i>            | 2,40256409 | 1,25e-06   |
| Ubiquitin specific peptidase 36                                            | <i>Usp36</i>            | 2,40141683 | 4,26e-05   |
| Glutathione transferase zeta 1 (maleylacetoacetate isomerase)              | <i>Gstz1</i>            | 2,39966273 | 3,96e-05   |
| Phosphatidylinositol glycan anchor biosynthesis, class k                   | <i>Pigk</i>             | 2,39703642 | 4,50e-07   |
| Sine oculis-related homeobox 1                                             | <i>Six1</i>             | 2,39392898 | 6,71e-06   |
| Zinc finger protein 703                                                    | <i>Zfp703</i>           | 2,39216217 | 1,01e-05   |
| Elav (embryonic lethal, abnormal vision, drosophila)-like 2 (hu antigen b) | <i>Elavl2</i>           | 2,39010592 | 2,68e-05   |
| Zinc finger protein 960 /// zinc finger protein 97                         | <i>Zfp960 /// zfp97</i> | 2,38994716 | 8,61e-06   |
| Obg-like atpase 1                                                          | <i>Ola1</i>             | 2,38874129 | 6,39e-07   |
| Eph receptor a2                                                            | <i>Epha2</i>            | 2,38662554 | 9,90e-07   |
| Wd repeat domain, phosphoinositide interacting 1                           | <i>Wipi1</i>            | 2,38656987 | 2,68e-05   |
| Thioredoxin reductase 3                                                    | <i>Txnrd3</i>           | 2,37697689 | 4,68e-05   |
| Myeloma overexpressed 2                                                    | <i>Myeov2</i>           | 2,37576791 | 1,21e-06   |
| Rho gtpase activating protein 20                                           | <i>Arhgap20</i>         | 2,37539378 | 5,10e-05   |



|                                                                        |                |            |            |
|------------------------------------------------------------------------|----------------|------------|------------|
| Potassium inwardly-rectifying channel, subfamily j, member 15          | <i>Kcnj15</i>  | 2,37321356 | 0,00011629 |
| Endonuclease domain containing 1                                       | <i>Endod1</i>  | 2,37306248 | 1,46e-06   |
| Rab3d, member ras oncogene family                                      | <i>Rab3d</i>   | 2,37179007 | 5,69e-05   |
| Camello-like 1                                                         | <i>Cml1</i>    | 2,36951781 | 4,37e-05   |
| Catechol-o-methyltransferase domain containing 1                       | <i>Comtd1</i>  | 2,36771921 | 1,49e-06   |
| Torsin family 3, member a                                              | <i>Tor3a</i>   | 2,36530858 | 3,52e-05   |
| Forkhead box p1                                                        | <i>Foxp1</i>   | 2,36431637 | 1,70e-05   |
| Solute carrier family 46, member 1                                     | <i>Slc46a1</i> | 2,36011802 | 5,40e-05   |
| Sec11 homolog c (s. Cerevisiae)                                        | <i>Sec11c</i>  | 2,35416773 | 6,55e-06   |
| Set domain, bifurcated 1                                               | <i>Setdb1</i>  | 2,35295087 | 2,06e-06   |
| Family with sequence similarity 210, member b                          | <i>Fam210b</i> | 2,35182343 | 1,17e-05   |
| Procollagen lysine, 2-oxoglutarate 5-dioxygenase 2                     | <i>Plod2</i>   | 2,3500749  | 0,00027066 |
| Wd repeat domain 20                                                    | <i>Wdr20</i>   | 2,3494245  | 6,56e-07   |
| La ribonucleoprotein domain family, member 6                           | <i>Larp6</i>   | 2,34929009 | 8,84e-06   |
| Arfgap with rhogap domain, ankyrin repeat and ph domain 2              | <i>Arap2</i>   | 2,34924029 | 6,71e-06   |
| Golgi coiled coil 1                                                    | <i>Gcc1</i>    | 2,34449959 | 1,22e-05   |
| Fas apoptotic inhibitory molecule                                      | <i>Faim</i>    | 2,34253898 | 1,43e-06   |
| Abhydrolase domain containing 14b                                      | <i>Abhd14b</i> | 2,34252805 | 0,0006562  |
| Zinc finger e-box binding homeobox 2                                   | <i>Zeb2</i>    | 2,34233033 | 5,23e-06   |
| Pr domain containing 5                                                 | <i>Prdm5</i>   | 2,33994606 | 2,19e-06   |
| Discoidin domain receptor family, member 1                             | <i>Ddr1</i>    | 2,33909863 | 3,94e-05   |
| Protein kinase inhibitor, alpha                                        | <i>Pkia</i>    | 2,33782321 | 0,0004957  |
| Transient receptor potential cation channel, subfamily v, member 2     | <i>Trpv2</i>   | 2,33730535 | 9,35e-06   |
| Adhesion molecule with ig like domain 1                                | <i>Amigo1</i>  | 2,33621441 | 1,11e-05   |
| Trafficking protein particle complex 2                                 | <i>Trappc2</i> | 2,33571215 | 6,23e-05   |
| Phosphatidylinositol 3-kinase, c2 domain containing, alpha polypeptide | <i>Pik3c2a</i> | 2,33362046 | 9,63e-06   |
| Phospholipase a2, group iie                                            | <i>Pla2g2e</i> | 2,33176897 | 1,15e-06   |
| Family with sequence similarity 174, member a                          | <i>Fam174a</i> | 2,33123171 | 0,00025352 |
| Fibronectin type iii domain containing 1                               | <i>Fndc1</i>   | 2,33026521 | 8,74e-05   |
| Lymphocyte antigen 75                                                  | <i>Ly75</i>    | 2,32953741 | 6,87e-05   |
| Mastermind like 1 (drosophila)                                         | <i>Maml1</i>   | 2,32854448 | 2,46e-05   |
| Nodal modulator 1                                                      | <i>Nomo1</i>   | 2,32374188 | 6,20e-05   |
| Interleukin 10 receptor, beta                                          | <i>Il10rb</i>  | 2,32317057 | 1,18e-06   |
| Ngg1 interacting factor 3-like 1 (s. Pombe)                            | <i>Nif3l1</i>  | 2,32237989 | 3,77e-07   |

|                                                                       |                                   |            |            |
|-----------------------------------------------------------------------|-----------------------------------|------------|------------|
| Protocadherin beta 7                                                  | <i>Pcdhb7</i>                     | 2,32179397 | 8,90e-05   |
| Myomesin 1                                                            | <i>Myom1</i>                      | 2,31886233 | 3,29e-06   |
| Lim domain containing preferred translocation partner in lipoma       | <i>Lpp</i>                        | 2,31833345 | 1,77e-06   |
| Pre b cell leukemia transcription factor interacting protein 1        | <i>Pbxip1</i>                     | 2,31757969 | 1,77e-06   |
| Histocompatibility 2, q region locus 4 ///                            | <i>H2-q4 ///</i> <i>h2-q6 ///</i> | 2,3152285  | 4,71e-06   |
| histocompatibility 2, q region locus 6 ///                            | <i>h2-q8 ///</i> <i>loc68395</i>  |            |            |
| histocompatibility 2, q region locus 8 ///                            |                                   |            |            |
| histocompatibility 2, q region locus 6-like                           |                                   |            |            |
| Tnfrsf1a-associated via death domain                                  | <i>Tradd</i>                      | 2,31504293 | 0,00065953 |
| Palladin, cytoskeletal associated protein                             | <i>Palld</i>                      | 2,3145407  | 1,46e-06   |
| Cytochrome p450, family 4, subfamily f, polypeptide 13                | <i>Cyp4f13</i>                    | 2,31055356 | 7,91e-06   |
| Zinc finger protein 930                                               | <i>Zfp930</i>                     | 2,30721496 | 0,00224688 |
| Bassoon                                                               | <i>Bsn</i>                        | 2,30720273 | 0,00106284 |
| Spla/ryanodine receptor domain and socs box containing 4              | <i>Spsb4</i>                      | 2,3056904  | 2,65e-05   |
| Nucleus accumbens associated 2, ben and btb (poz) domain containing   | <i>Nacc2</i>                      | 2,30522683 | 1,37e-05   |
| Inhibin beta-a                                                        | <i>Inhba</i>                      | 2,30187671 | 2,70e-05   |
| Golgi associated, gamma adaptin ear containing, arf binding protein 2 | <i>Gga2</i>                       | 2,29750135 | 6,69e-07   |
| Cryptochrome 2 (photolyase-like)                                      | <i>Cry2</i>                       | 2,29686118 | 4,74e-05   |
| Tripartite motif-containing 13                                        | <i>Trim13</i>                     | 2,28759392 | 0,00019454 |
| Chemokine (c-c motif) ligand 25                                       | <i>Ccl25</i>                      | 2,28733239 | 3,05e-06   |
| Rad52 homolog (s. Cerevisiae)                                         | <i>Rad52</i>                      | 2,2853705  | 7,95e-05   |
| Non-catalytic region of tyrosine kinase adaptor protein 2             | <i>Nck2</i>                       | 2,28485487 | 1,33e-06   |
| Predicted gene 13363 /// protein tyrosine phosphatase 4a1             | <i>Gm13363 ///</i> <i>ptp4a1</i>  | 2,27957913 | 0,00379532 |
| Transmembrane protein 41a                                             | <i>Tmem41a</i>                    | 2,27503794 | 2,07e-05   |
| Acid phosphatase 2, lysosomal                                         | <i>Acp2</i>                       | 2,27492595 | 5,77e-06   |
| Kinesin family member c3                                              | <i>Kifc3</i>                      | 2,27184475 | 1,36e-05   |
| Membrane magnesium transporter 2                                      | <i>Mmgf2</i>                      | 2,26990786 | 5,00e-06   |
| Aldehyde dehydrogenase 2, mitochondrial                               | <i>Aldh2</i>                      | 2,26897652 | 3,70e-07   |
| Protein-o-mannose kinase                                              | <i>Pomk</i>                       | 2,26747856 | 0,00030688 |
| Selenoprotein m                                                       | <i>Selm</i>                       | 2,26737428 | 0,00012314 |

|                                                                                            |                                  |            |            |
|--------------------------------------------------------------------------------------------|----------------------------------|------------|------------|
| Cellular repressor of e1a-stimulated genes 1                                               | <i>Creg1</i>                     | 2,2670189  | 1,88e-05   |
| Udp-glcnac:betagal beta-1,3-n-acetylglucosaminyltransferase 2                              | <i>B3gnt2</i>                    | 2,26658075 | 5,69e-05   |
| General transcription factor iia, 1-like                                                   | <i>Gtf2a1l</i>                   | 2,26601713 | 9,17e-06   |
| Sema domain, immunoglobulin domain (ig), and gpi membrane anchor, (semaphorin) 7a          | <i>Sema7a</i>                    | 2,26414655 | 6,31e-05   |
| Tetratricopeptide repeat domain 17                                                         | <i>Ttc17</i>                     | 2,263579   | 3,00e-05   |
| Interleukin 3 receptor, alpha chain                                                        | <i>Il3ra</i>                     | 2,26347806 | 0,00019028 |
| Solute carrier family 3 (activators of dibasic and neutral amino acid transport), member 2 | <i>Slc3a2</i>                    | 2,26320456 | 4,26e-07   |
| Potassium channel tetramerisation domain containing 1                                      | <i>Kctd1</i>                     | 2,26109762 | 1,34e-05   |
| Cap methyltransferase 2                                                                    | <i>Cmtr2</i>                     | 2,26052531 | 0,00156991 |
| Fin bud initiation factor homolog (zebrafish)                                              | <i>Fibin</i>                     | 2,25744586 | 9,51e-05   |
| Uroporphyrinogen iii synthase                                                              | <i>Uros</i>                      | 2,25709594 | 1,06e-06   |
| Riken cdna 2810408m09 gene /// transformation related protein 53 regulating kinase         | <i>2810408m09rik /// trp53rk</i> | 2,25438398 | 0,00010476 |
| Post-gpi attachment to proteins 2                                                          | <i>Pgap2</i>                     | 2,25277748 | 0,00010701 |
| Calsyntenin 1                                                                              | <i>Clstn1</i>                    | 2,25167753 | 1,17e-06   |
| Rb1-inducible coiled-coil 1                                                                | <i>Rb1cc1</i>                    | 2,25125218 | 1,34e-06   |
| Endoplasmic reticulum lectin 1                                                             | <i>Erlec1</i>                    | 2,25101061 | 0,00015654 |
| Nfkb activating protein-like                                                               | <i>Nkapl</i>                     | 2,25054469 | 1,38e-05   |
| Integrin beta 6                                                                            | <i>Itgb6</i>                     | 2,24959741 | 3,24e-05   |
| Mitochondrial ribosomal protein l50                                                        | <i>Mrpl50</i>                    | 2,24767275 | 3,00e-05   |
| Ectonucleotide pyrophosphatase/phosphodiesterase 4                                         | <i>Enpp4</i>                     | 2,24672842 | 8,24e-06   |
| Mitochondrial ribosomal protein s2                                                         | <i>Mrps2</i>                     | 2,24629292 | 6,44e-07   |
| Peroxiredoxin 6                                                                            | <i>Prdx6</i>                     | 2,24546341 | 1,74e-06   |
| Glutamyl-trna synthetase 2 (mitochondrial)(putative)                                       | <i>Ears2</i>                     | 2,245029   | 1,54e-05   |
| Transmembrane protein 115                                                                  | <i>Tmem115</i>                   | 2,24473829 | 3,62e-05   |
| Phosphohistidine phosphatase 1                                                             | <i>Phpt1</i>                     | 2,24272188 | 0,00504549 |
| Creatine kinase, brain                                                                     | <i>Ckb</i>                       | 2,24215339 | 1,50e-06   |
| Dual specificity phosphatase 14                                                            | <i>Dusp14</i>                    | 2,2418213  | 2,66e-06   |
| Sec62 homolog (s. Cerevisiae)                                                              | <i>Sec62</i>                     | 2,24118266 | 0,00121725 |
| Zinc finger protein 937                                                                    | <i>Zfp937</i>                    | 2,23853567 | 1,01e-06   |
| Baculoviral iap repeat-containing 3                                                        | <i>Birc3</i>                     | 2,23733482 | 6,82e-05   |
| Mitogen-activated protein kinase 12                                                        | <i>Mapk12</i>                    | 2,23680764 | 1,67e-05   |

|                                                                           |                            |            |            |
|---------------------------------------------------------------------------|----------------------------|------------|------------|
| Solute carrier family 35, member c1                                       | <i>Slc35c1</i>             | 2,23547978 | 0,00048157 |
| Male-specific lethal 3-like 2 (drosophila)                                | <i>Msl3l2</i>              | 2,23509564 | 2,77e-06   |
| Kinesin family member 1b                                                  | <i>Kif1b</i>               | 2,23504608 | 8,35e-06   |
| Translation machinery associated 16 homolog (s. Cerevisiae)               | <i>Tma16</i>               | 2,23440802 | 1,23e-05   |
| Neurotrimin                                                               | <i>Ntm</i>                 | 2,23407324 | 0,00061557 |
| T cell lymphoma invasion and metastasis 1                                 | <i>Tiam1</i>               | 2,23363551 | 0,00013815 |
| Phosphorylase kinase alpha 1                                              | <i>Phka1</i>               | 2,2325548  | 6,87e-05   |
| Disabled 2 interacting protein                                            | <i>Dab2ip</i>              | 2,23252662 | 3,47e-06   |
| Thump domain containing 1                                                 | <i>Thumpd1</i>             | 2,23084124 | 2,64e-06   |
| Bcs1-like (yeast)                                                         | <i>Bcs1l</i>               | 2,22973551 | 7,26e-07   |
| Calcium channel, voltage-dependent, l type, alpha 1c subunit              | <i>Cacna1c</i>             | 2,22835669 | 6,71e-06   |
| Expressed sequence ai503316 /// heterogeneous nuclear ribonucleoprotein u | <i>Ai503316 /// hnrnpu</i> | 2,22623383 | 2,04e-05   |
| Phosphodiesterase 4d interacting protein (myomegalin)                     | <i>Pde4dip</i>             | 2,22338597 | 0,00034899 |
| G elongation factor, mitochondrial 1                                      | <i>Gfm1</i>                | 2,22315982 | 3,40e-07   |
| Solute carrier family 20, member 1                                        | <i>Slc20a1</i>             | 2,22234249 | 1,75e-06   |
| Zinc finger, an1-type domain 1                                            | <i>Zfand1</i>              | 2,22183643 | 5,84e-05   |
| 2,4-dienoyl coa reductase 1, mitochondrial                                | <i>Decr1</i>               | 2,22113496 | 2,22e-06   |
| Neuraminidase 1                                                           | <i>Neu1</i>                | 2,21943377 | 2,82e-05   |
| Transmembrane protein 30a                                                 | <i>Tmem30a</i>             | 2,21938215 | 1,44e-05   |
| Protein phosphatase 1, regulatory (inhibitor) subunit 14c                 | <i>Ppp1r14c</i>            | 2,21820972 | 3,79e-05   |
| Syndecan 4                                                                | <i>Sdc4</i>                | 2,21671326 | 1,77e-05   |
| Pelota homolog (drosophila)                                               | <i>Pelo</i>                | 2,21440346 | 1,69e-05   |
| Nuclear protein transcription regulator 1                                 | <i>Nupr1</i>               | 2,21345342 | 9,55e-06   |
| Sr-related ctd-associated factor 8                                        | <i>Scaf8</i>               | 2,21183569 | 9,23e-06   |
| Lectin, galactoside-binding, soluble, 3 binding protein                   | <i>Lgals3bp</i>            | 2,20999232 | 6,87e-05   |
| Complement component 2 (within h-2s)                                      | <i>C2</i>                  | 2,2084382  | 5,51e-06   |
| Yip1 domain family, member 2                                              | <i>Yipf2</i>               | 2,20544623 | 0,00015361 |
| L-3-hydroxyproline dehydratase (trans-)                                   | <i>L3hypdh</i>             | 2,20530651 | 0,00026304 |
| Riken cdna 2610301b20 gene                                                | <i>2610301b20rik</i>       | 2,20303878 | 7,35e-05   |
| Transcription elongation factor, mitochondrial                            | <i>Tefm</i>                | 2,20053348 | 2,73e-05   |
| Phosphatidylinositol glycan anchor biosynthesis, class s                  | <i>Pigs</i>                | 2,19507177 | 1,87e-06   |

|                                                                                        |                 |            |            |
|----------------------------------------------------------------------------------------|-----------------|------------|------------|
| Feminization 1 homolog b (c. Elegans)                                                  | <i>Fem1b</i>    | 2,19408733 | 9,47e-05   |
| Udp-glcnac:betagal beta-1,3-n-acetylglucosaminyltransferase 3                          | <i>B3gnt3</i>   | 2,1931716  | 0,00013216 |
| Ribosomal rna processing 15 homolog (s. Cerevisiae)                                    | <i>Rrp15</i>    | 2,19288807 | 1,44e-05   |
| Major histocompatibility complex, class i-related                                      | <i>Mr1</i>      | 2,19085091 | 0,00018825 |
| Bone morphogenetic protein 1                                                           | <i>Bmp1</i>     | 2,19047322 | 8,38e-05   |
| P21 protein (cdc42/rac)-activated kinase 1                                             | <i>Pak1</i>     | 2,18812955 | 5,10e-07   |
| Tripeptidyl peptidase i                                                                | <i>Tpp1</i>     | 2,18757917 | 3,37e-06   |
| Phenylalanine-trna synthetase 2 (mitochondrial)                                        | <i>Fars2</i>    | 2,18720485 | 0,00091472 |
| Density-regulated protein                                                              | <i>Denr</i>     | 2,18702026 | 1,48e-06   |
| Biphenyl hydrolase-like (serine hydrolase, breast epithelial mucin-associated antigen) | <i>Bphl</i>     | 2,18442724 | 4,14e-06   |
| Membrane associated guanylate kinase, ww and pdz domain containing 3                   | <i>Magi3</i>    | 2,1842783  | 8,13e-05   |
| Fibroblast growth factor binding protein 1                                             | <i>Fgfbp1</i>   | 2,18409123 | 0,00018861 |
| Expressed sequence ai837181                                                            | <i>Ai837181</i> | 2,18314085 | 1,57e-05   |
| Rho gtpase activating protein 21                                                       | <i>Arhgap21</i> | 2,18296459 | 3,96e-06   |
| Lanc (bacterial lantibiotic synthetase component c)-like 1                             | <i>Lancl1</i>   | 2,17949811 | 6,81e-07   |
| Ataxin 7-like 1                                                                        | <i>Atxn7l1</i>  | 2,17936215 | 5,11e-06   |
| Prostaglandin e synthase                                                               | <i>Ptges</i>    | 2,17512493 | 3,46e-06   |
| C-type lectin domain family 4, member e                                                | <i>Clec4e</i>   | 2,17476957 | 9,04e-06   |
| Glutaredoxin                                                                           | <i>GlrX</i>     | 2,17475829 | 4,74e-07   |
| Solute carrier family 39 (zinc transporter), member 14                                 | <i>Slc39a14</i> | 2,17462659 | 1,79e-06   |
| Histone deacetylase 11                                                                 | <i>Hdac11</i>   | 2,1734078  | 3,54e-05   |
| Dph5 homolog (s. Cerevisiae)                                                           | <i>Dph5</i>     | 2,17280921 | 9,93e-07   |
| Transmembrane protein 11                                                               | <i>Tmem11</i>   | 2,17221865 | 2,87e-06   |
| Eh domain binding protein 1-like 1                                                     | <i>Ehbp1l1</i>  | 2,17075678 | 8,39e-06   |
| Cleavage stimulation factor, 3' pre-rna subunit 2, tau                                 | <i>Cstf2t</i>   | 2,16984923 | 1,30e-06   |
| Cytochrome c oxidase assembly factor 7                                                 | <i>Coa7</i>     | 2,16883354 | 2,24e-06   |
| 5'-nucleotidase, cytosolic iiib                                                        | <i>Nt5c3b</i>   | 2,16855386 | 1,26e-05   |
| Nucleobindin 1                                                                         | <i>Nucb1</i>    | 2,16821625 | 5,76e-06   |
| Angel homolog 2 (drosophila)                                                           | <i>Angel2</i>   | 2,16736055 | 0,00087444 |
| Isoamyl acetate-hydrolyzing esterase 1 homolog (s. Cerevisiae)                         | <i>Iah1</i>     | 2,16688368 | 4,80e-06   |
| Cd38 antigen                                                                           | <i>Cd38</i>     | 2,16655521 | 1,20e-05   |
| Dynein light chain tctex-type 3                                                        | <i>Dynlt3</i>   | 2,16517531 | 4,18e-06   |

|                                                                  |                                |            |            |
|------------------------------------------------------------------|--------------------------------|------------|------------|
| Poliovirus receptor-related 2                                    | <i>Pvr12</i>                   | 2,1614209  | 1,23e-05   |
| Phospholipase a2 receptor 1                                      | <i>Pla2r1</i>                  | 2,15873453 | 2,79e-06   |
| Myelocytomatosis oncogene                                        | <i>Myc</i>                     | 2,15572063 | 1,21e-05   |
| Yth domain family 2                                              | <i>Ythdf2</i>                  | 2,15434177 | 3,43e-06   |
| Tetratricopeptide repeat domain 14                               | <i>Ttc14</i>                   | 2,15399662 | 7,98e-05   |
| Coiled-coil domain containing 107                                | <i>Ccdc107</i>                 | 2,15375358 | 5,36e-06   |
| Autophagy related 10                                             | <i>Atg10</i>                   | 2,15180228 | 1,30e-05   |
| Fragile x mental retardation 1 neighbor                          | <i>Fmr1nb</i>                  | 2,15136528 | 6,52e-06   |
| Tubulin polymerization-promoting protein family member 3         | <i>Tppp3</i>                   | 2,15038002 | 6,22e-05   |
| Colony stimulating factor 1 (macrophage)                         | <i>Csf1</i>                    | 2,15037652 | 2,94e-06   |
| Transmembrane protein 70                                         | <i>Tmem70</i>                  | 2,14892102 | 3,30e-06   |
| Filamin binding lim protein 1                                    | <i>Fblim1</i>                  | 2,14775846 | 3,87e-06   |
| Arfgap with gtpase domain, ankyrin repeat and ph domain 1        | <i>Agap1</i>                   | 2,14501505 | 1,27e-05   |
| 3-phosphoglycerate dehydrogenase pseudogene ///                  | <i>Gm6756 ///</i> <i>phgdh</i> | 2,14459185 | 4,56e-07   |
| 3-phosphoglycerate dehydrogenase                                 |                                |            |            |
| Cell division cycle 73, paf1/rna polymerase ii complex component | <i>Cdc73</i>                   | 2,14420446 | 3,56e-05   |
| Hypoxia up-regulated 1                                           | <i>Hyou1</i>                   | 2,14396155 | 0,00094405 |
| Cell cycle associated protein 1                                  | <i>Caprin1</i>                 | 2,1392139  | 3,60e-05   |
| Proline-rich nuclear receptor coactivator 1                      | <i>Pnrc1</i>                   | 2,13911202 | 4,15e-06   |
| Ras p21 protein activator 3                                      | <i>Rasa3</i>                   | 2,13849049 | 8,57e-07   |
| Brain and acute leukemia, cytoplasmic                            | <i>Baalc</i>                   | 2,13839045 | 2,07e-06   |
| Golgi phosphoprotein 3-like                                      | <i>Golph3l</i>                 | 2,1367046  | 3,11e-06   |
| A kinase (prka) anchor protein 2                                 | <i>Akap2</i>                   | 2,13650447 | 4,43e-06   |
| Pseudouridylyl synthase 10                                       | <i>Pus10</i>                   | 2,13307637 | 0,00053519 |
| Neuroblastoma ras oncogene                                       | <i>Nras</i>                    | 2,13291134 | 4,05e-06   |
| Mitogen-activated protein kinase kinase kinase 8                 | <i>Map3k8</i>                  | 2,13216597 | 0,00067565 |
| Heat shock protein 5                                             | <i>Hspa5</i>                   | 2,13168275 | 3,78e-06   |
| Solute carrier family 25, member 45                              | <i>Slc25a45</i>                | 2,12743682 | 7,16e-05   |
| Zinc finger swim-type containing 1                               | <i>Zswim1</i>                  | 2,1266814  | 2,07e-05   |
| Fumarylacetoacetate hydrolase                                    | <i>Fah</i>                     | 2,12547217 | 3,07e-06   |
| Runt related transcription factor 1                              | <i>Runx1</i>                   | 2,12545477 | 2,05e-05   |
| Interleukin 17 receptor c                                        | <i>Il17rc</i>                  | 2,12391206 | 1,06e-05   |
| Nudix (nucleoside diphosphate linked moiety x)-type motif 16     | <i>Nudt16</i>                  | 2,12385207 | 1,46e-05   |
| Astrotactin 1                                                    | <i>Astn1</i>                   | 2,12307439 | 8,85e-05   |

|                                                         |                         |            |            |
|---------------------------------------------------------|-------------------------|------------|------------|
| Neugrin, neurite outgrowth associated                   | <i>Ngrn</i>             | 2,12232385 | 0,00022217 |
| Activin receptor iia                                    | <i>Acvr2a</i>           | 2,12134341 | 2,05e-06   |
| Egf-like repeats and discoidin i-like domains 3         | <i>Edil3</i>            | 2,11894727 | 0,0022412  |
| Methyltransferase like 6                                | <i>Mettl6</i>           | 2,11700661 | 2,77e-05   |
| Myosin id                                               | <i>Myo1d</i>            | 2,11652524 | 0,00197423 |
| Diacylglycerol o-acyltransferase 2                      | <i>Dgat2</i>            | 2,11583638 | 2,00e-05   |
| Golgi membrane protein 1                                | <i>Golm1</i>            | 2,11439917 | 1,63e-06   |
| Atp5s-like                                              | <i>Atp5sl</i>           | 2,11297203 | 2,11e-05   |
| Transmembrane protein 191c                              | <i>Tmem191c</i>         | 2,11280678 | 0,00021368 |
| Adipocyte plasma membrane associated protein            | <i>Apmap</i>            | 2,1127467  | 6,74e-06   |
| Exostoses (multiple)-like 2                             | <i>Extl2</i>            | 2,10988729 | 2,88e-06   |
| Sh3-domain binding protein 4                            | <i>Sh3bp4</i>           | 2,10935926 | 3,97e-06   |
| Inhibin beta-b                                          | <i>Inhbb</i>            | 2,10883144 | 0,00044776 |
| Vesicle-associated membrane protein 2                   | <i>Vamp2</i>            | 2,10860127 | 0,00568917 |
| Glutaryl-coenzyme a dehydrogenase                       | <i>Gcdh</i>             | 2,10809041 | 1,98e-05   |
| Cd320 antigen                                           | <i>Cd320</i>            | 2,1064965  | 1,68e-06   |
| Atm interactor                                          | <i>Atmin</i>            | 2,10592914 | 6,10e-06   |
| Eukaryotic translation initiation factor 1a, x-linked   | <i>Eif1ax</i>           | 2,10432486 | 4,41e-05   |
| Receptor-type tyrosine-protein phosphatase eta-like     | <i>Loc102641972 ///</i> | 2,1042178  | 0,00408396 |
| /// protein tyrosine phosphatase, receptor type, j      | <i>ptprj</i>            |            |            |
| Superoxide dismutase 2, mitochondrial                   | <i>Sod2</i>             | 2,10420787 | 4,37e-07   |
| Shroom family member 3                                  | <i>Shroom3</i>          | 2,10381393 | 0,00275905 |
| Transmembrane emp24-like trafficking protein 10 (yeast) | <i>Tmed10</i>           | 2,10341017 | 5,33e-07   |
| Rho gdp dissociation inhibitor (gdi) gamma              | <i>Arhgdig</i>          | 2,10269951 | 2,81e-06   |
| Interferon (alpha and beta) receptor 2                  | <i>Ifnar2</i>           | 2,10246131 | 7,20e-07   |
| Zinc finger, cchc domain containing 18                  | <i>Zcchc18</i>          | 2,10207063 | 0,00018938 |
| Sorting nexin 18                                        | <i>Snx18</i>            | 2,10146771 | 1,93e-06   |
| Cleavage stimulation factor, 3' pre-rna subunit 2       | <i>Cstf2</i>            | 2,10075518 | 2,20e-05   |
| Polyribonucleotide nucleotidyltransferase 1             | <i>Pnpt1</i>            | 2,0990668  | 8,20e-05   |
| Ubiquitin-conjugating enzyme e2 variant 2               | <i>Ube2v2</i>           | 2,09743182 | 0,00120974 |
| Tnfrsf3 interacting protein 1                           | <i>Tnfrsf3</i>          | 2,09510015 | 5,67e-06   |
| Apolipoprotein e                                        | <i>Apoe</i>             | 2,09374935 | 4,01e-05   |
| Tyrosine kinase, non-receptor, 2                        | <i>Tnk2</i>             | 2,09311555 | 0,00021114 |
| Dalr anticodon binding domain containing 3              | <i>Dalrd3</i>           | 2,08596676 | 6,11e-06   |
| Radial spoke head 9 homolog (chlamydomonas)             | <i>Rsph9</i>            | 2,08570777 | 2,71e-05   |
| Riken cdna 1110008p14 gene                              | <i>1110008p14rik</i>    | 2,08525103 | 9,08e-06   |
| Methyltransferase like 8                                | <i>Mettl8</i>           | 2,08376194 | 2,82e-05   |

|                                                                              |                |            |            |
|------------------------------------------------------------------------------|----------------|------------|------------|
| Z-dna binding protein 1                                                      | <i>Zbp1</i>    | 2,08312076 | 6,08e-06   |
| Zinc finger and btb domain containing 21                                     | <i>Zbtb21</i>  | 2,08064497 | 9,59e-05   |
| Crystallin, zeta                                                             | <i>Cryz</i>    | 2,07924831 | 1,26e-06   |
| Cingulin-like 1                                                              | <i>Cgnl1</i>   | 2,07908743 | 5,36e-07   |
| Protein phosphatase 1b, magnesium dependent, beta isoform                    | <i>Ppm1b</i>   | 2,07736289 | 1,43e-06   |
| Ubiquitin-associated protein 1                                               | <i>Ubap1</i>   | 2,0769676  | 8,01e-07   |
| Zinc finger protein 830                                                      | <i>Zfp830</i>  | 2,07668428 | 0,00062507 |
| Egf domain-specific o-linked n-acetylglucosamine (glcnac) transferase        | <i>Eogt</i>    | 2,07605574 | 1,56e-05   |
| Purinergic receptor p2x, ligand-gated ion channel, 3                         | <i>P2rx3</i>   | 2,07577038 | 0,00034361 |
| Glucosamine-phosphate n-acetyltransferase 1                                  | <i>Gnpnat1</i> | 2,0757461  | 2,20e-06   |
| Component of oligomeric golgi complex 8                                      | <i>Cog8</i>    | 2,07504663 | 2,36e-06   |
| Ring finger protein 11                                                       | <i>Rnf11</i>   | 2,0745438  | 8,57e-07   |
| Pecanex-like 4 (drosophila)                                                  | <i>Pcnxl4</i>  | 2,07096509 | 4,15e-06   |
| Zinc finger protein interacting with k protein 1                             | <i>Zik1</i>    | 2,07021054 | 9,59e-05   |
| Catechol-o-methyltransferase                                                 | <i>Comt</i>    | 2,06963523 | 0,00205738 |
| Potassium voltage-gated channel, subfamily h (eag-related), member 2         | <i>Kcnh2</i>   | 2,0694996  | 0,00012766 |
| Afg3-like aaa atpase 2                                                       | <i>Afg3l2</i>  | 2,0683958  | 4,80e-05   |
| Iron-sulfur cluster assembly 2 homolog (s. Cerevisiae)                       | <i>Isca2</i>   | 2,06738283 | 2,79e-06   |
| Proteasome (prosome, macropain) 26s subunit, non-atpase, 10                  | <i>Psmc10</i>  | 2,06642615 | 6,77e-06   |
| Phosphodiesterase 10a                                                        | <i>Pde10a</i>  | 2,06439519 | 0,00057784 |
| Hect, uba and wwe domain containing 1                                        | <i>Hurwe1</i>  | 2,06358013 | 4,43e-06   |
| Zinc finger protein 2                                                        | <i>Zfp2</i>    | 2,06240781 | 1,79e-05   |
| Transcription elongation factor b (siii), polypeptide 1                      | <i>Tceb1</i>   | 2,06079121 | 3,66e-06   |
| Transforming growth factor beta regulated gene 1                             | <i>Tbrg1</i>   | 2,06012118 | 1,35e-06   |
| Solute carrier family 30 (zinc transporter), member 4                        | <i>Slc30a4</i> | 2,05900552 | 2,00e-05   |
| Ventral anterior homeobox 2                                                  | <i>Vax2</i>    | 2,05894997 | 1,75e-05   |
| Translocase of inner mitochondrial membrane 8a1                              | <i>Timm8a1</i> | 2,05876915 | 1,34e-05   |
| Glycogenin                                                                   | <i>Gyg</i>     | 2,05795145 | 6,18e-06   |
| Protein-l-isoaspartate (d-aspartate) o-methyltransferase domain containing 2 | <i>Pcmt2</i>   | 2,05769587 | 0,00100164 |
| Mitochondrial ribosomal protein l44                                          | <i>Mrpl44</i>  | 2,05760726 | 5,05e-06   |
| Heat shock protein 9                                                         | <i>Hspa9</i>   | 2,05691826 | 9,05e-07   |
| Creb/atf bzip transcription factor                                           | <i>Crebzf</i>  | 2,05450508 | 0,00473611 |



|                                                                         |                          |            |            |
|-------------------------------------------------------------------------|--------------------------|------------|------------|
| Complement component 1, r subcomponent a                                | <i>C1ra</i>              | 2,0532636  | 2,31e-06   |
| Friend leukemia integration 1                                           | <i>Fli1</i>              | 2,04707482 | 0,00014722 |
| Snail family zinc finger 2                                              | <i>Snai2</i>             | 2,04684495 | 2,66e-05   |
| Dna-damage regulated autophagy modulator 2                              | <i>Dram2</i>             | 2,0452602  | 5,48e-05   |
| Androgen receptor                                                       | <i>Ar</i>                | 2,04402996 | 0,00050185 |
| Insulin receptor substrate 2                                            | <i>Irs2</i>              | 2,04269037 | 3,80e-05   |
| Predicted gene, 20559                                                   | <i>Gm20559</i>           | 2,04026771 | 3,82e-06   |
| Karyopherin (importin) alpha 1                                          | <i>Kpna1</i>             | 2,03961125 | 0,00052265 |
| Poliovirus receptor                                                     | <i>Pvr</i>               | 2,03939655 | 4,38e-05   |
| Zinc finger protein 281                                                 | <i>Zfp281</i>            | 2,03938974 | 4,21e-06   |
| Intraflagellar transport 81                                             | <i>Ift81</i>             | 2,03880198 | 4,08e-06   |
| Translocase of outer mitochondrial membrane 70 homolog a (yeast)        | <i>Tomm70a</i>           | 2,03764639 | 0,00012857 |
| Cytotoxic t lymphocyte-associated protein 2 beta                        | <i>Ctla2b</i>            | 2,03686918 | 7,87e-07   |
| Guanine nucleotide binding protein (g protein), beta polypeptide 1-like | <i>Gnb1l</i>             | 2,03599126 | 1,90e-05   |
| Meteorin, glial cell differentiation regulator-like                     | <i>Metrn1</i>            | 2,03583879 | 4,65e-06   |
| Chemokine (c-c motif) ligand 2                                          | <i>Ccl2</i>              | 2,03568083 | 5,80e-05   |
| Riken cDNA 1700010i14 gene                                              | <i>1700010i14rik</i>     | 2,03453407 | 0,00010202 |
| Translocase of inner mitochondrial membrane 10                          | <i>Timm10</i>            | 2,03424505 | 1,86e-05   |
| Udp-glucuronate decarboxylase 1                                         | <i>Uxs1</i>              | 2,03421243 | 0,00014195 |
| Coenzyme q3 homolog, methyltransferase (yeast)                          | <i>Coq3</i>              | 2,03366775 | 4,77e-05   |
| Rap1 interacting factor 1 homolog (yeast)                               | <i>Rif1</i>              | 2,03157737 | 0,00067701 |
| Ww domain-containing oxidoreductase                                     | <i>Wwox</i>              | 2,03114818 | 1,22e-05   |
| Phosphoribosyl pyrophosphate synthetase 1 ///                           | <i>Prps1 /// prps1l3</i> | 2,03079917 | 0,00078912 |
| phosphoribosyl pyrophosphate synthetase 1-like 3                        |                          |            |            |
| Wd repeat domain 33                                                     | <i>Wdr33</i>             | 2,0307778  | 0,0003787  |
| Ubiquitin-conjugating enzyme e2w (putative)                             | <i>Ube2w</i>             | 2,02946204 | 0,00119469 |
| Znrd1 antisense                                                         | <i>Znrd1as</i>           | 2,02938293 | 7,15e-05   |
| Coiled-coil-helix-coiled-coil-helix domain containing 4                 | <i>Chchd4</i>            | 2,02816368 | 1,81e-05   |
| Olfactomedin-like 2b                                                    | <i>Olfml2b</i>           | 2,02799102 | 5,95e-06   |
| Family with sequence similarity 63, member a                            | <i>Fam63a</i>            | 2,02778687 | 1,19e-05   |
| Neogenin                                                                | <i>Neo1</i>              | 2,02566059 | 5,46e-06   |
| Collagen, type v, alpha 1                                               | <i>Col5a1</i>            | 2,02543844 | 2,63e-06   |
| Lysine rich nucleolar protein 1                                         | <i>Knop1</i>             | 2,02536668 | 1,72e-06   |
| Family with sequence similarity 118, member b                           | <i>Fam118b</i>           | 2,02375183 | 3,11e-06   |
| Taxilin beta                                                            | <i>Txlnb</i>             | 2,02301698 | 0,0035914  |

|                                                                                                   |                               |            |            |
|---------------------------------------------------------------------------------------------------|-------------------------------|------------|------------|
| Protein kinase, dna activated, catalytic polypeptide                                              | <i>Prkdc</i>                  | 2,0228925  | 1,84e-05   |
| Guanylate binding protein 2b                                                                      | <i>Gbp2b</i>                  | 2,02240429 | 3,53e-06   |
| At rich interactive domain 5b (mrf1-like)                                                         | <i>Arid5b</i>                 | 2,02226187 | 4,07e-06   |
| G protein-coupled receptor 137b /// g protein-coupled receptor 137b, pseudogene                   | <i>Gpr137b /// gpr137b-ps</i> | 2,02224936 | 6,32e-07   |
| Hydroxysteroid (17-beta) dehydrogenase 10                                                         | <i>Hsd17b10</i>               | 2,02173204 | 1,74e-05   |
| Fyn binding protein                                                                               | <i>Fyb</i>                    | 2,01999313 | 2,31e-05   |
| Aftiphilin                                                                                        | <i>Aftph</i>                  | 2,01964717 | 6,32e-06   |
| Bystin-like                                                                                       | <i>Bysl</i>                   | 2,01898372 | 5,53e-05   |
| Methylthioadenosine phosphorylase                                                                 | <i>Mtap</i>                   | 2,01676177 | 1,11e-06   |
| Apolipoprotein a-i binding protein                                                                | <i>Apoa1bp</i>                | 2,01362882 | 8,73e-07   |
| Interferon-induced protein with tetratricopeptide repeats 1                                       | <i>Ifit1</i>                  | 2,01188892 | 6,18e-05   |
| Methylenetetrahydrofolate dehydrogenase (nad+ dependent), methenyltetrahydrofolate cyclohydrolase | <i>Mthfd2</i>                 | 2,01074902 | 4,80e-06   |
| Glypican 6                                                                                        | <i>Gpc6</i>                   | 2,00989888 | 4,17e-05   |
| Mitogen-activated protein kinase 8 interacting protein 1                                          | <i>Mapk8ip1</i>               | 2,00984945 | 0,00021457 |
| Cytidine and dcmp deaminase domain containing 1                                                   | <i>Cdadc1</i>                 | 2,00904847 | 0,00053742 |
| Atp-binding cassette, sub-family c (cftr/mrp), member 5                                           | <i>Abcc5</i>                  | 2,00847681 | 1,74e-06   |
| Mesoderm development candidate 2                                                                  | <i>Mesdc2</i>                 | 2,00670061 | 9,85e-07   |
| Gtp cyclohydrolase 1                                                                              | <i>Gch1</i>                   | 2,00620721 | 0,00193333 |
| Cytochrome p450, family 39, subfamily a, polypeptide 1                                            | <i>Cyp39a1</i>                | 2,00435146 | 0,0004947  |
| Ddhd domain containing 1                                                                          | <i>Ddhd1</i>                  | 2,00421194 | 0,00043874 |
| Progesterone receptor membrane component 2                                                        | <i>Pgrmc2</i>                 | 2,00350011 | 2,57e-05   |
| Bridging integrator 1                                                                             | <i>Bin1</i>                   | 2,0032385  | 1,68e-06   |
| Protein kinase c, delta                                                                           | <i>Prkcd</i>                  | 2,0029586  | 4,62e-06   |
| Trna methyltransferase 10b                                                                        | <i>Trmt10b</i>                | 2,00292894 | 0,00011142 |
| Ankyrin repeat domain 13c                                                                         | <i>Ankrd13c</i>               | 2,00284857 | 1,52e-05   |
| 2-oxoglutarate and iron-dependent oxygenase domain containing 3                                   | <i>Ogfod3</i>                 | 2,0018096  | 2,89e-05   |
| Xylulokinase homolog (h. Influenzae)                                                              | <i>Xylb</i>                   | 2,00107536 | 0,0004947  |
| Cadherin 2                                                                                        | <i>Cdh2</i>                   | 2,00100155 | 1,87e-05   |
| Phosphatidylserine decarboxylase, pseudogene 1 /// phosphatidylserine decarboxylase, pseudogene 3 | <i>Pisd-ps1 /// pisd-ps3</i>  | 2,00090175 | 7,89e-05   |

|                                                                                       |                 |            |            |
|---------------------------------------------------------------------------------------|-----------------|------------|------------|
| Cysteine and glycine-rich protein 1                                                   | <i>Csrp1</i>    | 2,00067512 | 0,00016953 |
| Ganglioside-induced differentiation-associated protein 1-like 1                       | <i>Gdap11l</i>  | 1,99735191 | 0,00032218 |
| Carbonic anhydrase 11                                                                 | <i>Car11</i>    | 1,99687838 | 3,06e-05   |
| Wd repeat domain 12                                                                   | <i>Wdr12</i>    | 1,99678572 | 6,18e-05   |
| Insulin-like growth factor 2 mrna binding protein 2                                   | <i>Igf2bp2</i>  | 1,9966438  | 1,89e-06   |
| Slit-robo rho gtpase activating protein 2                                             | <i>Srgap2</i>   | 1,99638521 | 4,02e-06   |
| Serine (or cysteine) peptidase inhibitor, clade i, member 2                           | <i>Serpini2</i> | 1,99507196 | 8,45e-05   |
| Solute carrier family 7 (cationic amino acid transporter, y+ system), member 2        | <i>Slc7a2</i>   | 1,99503049 | 0,00018189 |
| Rab9, member ras oncogene family                                                      | <i>Rab9</i>     | 1,99446692 | 6,08e-06   |
| Rrs1 ribosome biogenesis regulator homolog (s. Cerevisiae)                            | <i>Rrs1</i>     | 1,99402261 | 6,73e-06   |
| Complement component (3b/4b) receptor 1-like                                          | <i>Cr1l</i>     | 1,99270214 | 7,81e-06   |
| Regulator of chromosome condensation (rcc1) and btb (poz) domain containing protein 2 | <i>Rcctb2</i>   | 1,99245846 | 0,00038093 |
| Bicaudal d homolog 1 (drosophila)                                                     | <i>Bicd1</i>    | 1,99125968 | 4,37e-05   |
| Dopey family member 2                                                                 | <i>Dopey2</i>   | 1,99123522 | 3,19e-05   |
| Suppression of tumorigenicity 5                                                       | <i>St5</i>      | 1,99107738 | 8,24e-06   |
| Iroquois related homeobox 1 (drosophila)                                              | <i>Irx1</i>     | 1,98950279 | 4,37e-06   |
| Six transmembrane epithelial antigen of the prostate 1                                | <i>Steap1</i>   | 1,98890401 | 8,98e-07   |
| Dual specificity phosphatase 16                                                       | <i>Dusp16</i>   | 1,98797408 | 3,31e-06   |
| Chloride channel 3                                                                    | <i>Clcn3</i>    | 1,98682918 | 3,40e-05   |
| Xenotropic and polytropic retrovirus receptor 1                                       | <i>Xpr1</i>     | 1,98660019 | 1,34e-05   |
| Ras homolog gene family, member c                                                     | <i>Rhoc</i>     | 1,98497739 | 0,00112429 |
| Solute carrier organic anion transporter family, member 1a6                           | <i>Slco1a6</i>  | 1,98374661 | 0,00147251 |
| Limb region 1                                                                         | <i>Lmbr1</i>    | 1,98353719 | 5,10e-05   |
| Baculoviral iap repeat-containing 2                                                   | <i>Birc2</i>    | 1,98332023 | 4,21e-06   |
| Queueine trna-ribosyltransferase 1                                                    | <i>Qtrt1</i>    | 1,98301447 | 9,13e-06   |
| Rna methyltransferase like 1                                                          | <i>Rnmtl1</i>   | 1,9829129  | 1,12e-06   |
| Calmin                                                                                | <i>Clmn</i>     | 1,98231377 | 0,00025643 |
| Membrane-spanning 4-domains, subfamily a, member 4d                                   | <i>Ms4a4d</i>   | 1,98219587 | 8,16e-05   |
| Keratinocyte associated protein 2                                                     | <i>Krtcap2</i>  | 1,98171599 | 6,59e-06   |
| Programmed cell death 6 interacting protein                                           | <i>Pdcd6ip</i>  | 1,9809943  | 0,00043658 |

|                                                                       |                      |            |            |
|-----------------------------------------------------------------------|----------------------|------------|------------|
| Htra serine peptidase 3                                               | <i>Htra3</i>         | 1,98077334 | 5,08e-05   |
| Low density lipoprotein receptor-related protein associated protein 1 | <i>Lrpap1</i>        | 1,98028666 | 7,39e-06   |
| Ring finger protein 38                                                | <i>Rnf38</i>         | 1,97846691 | 2,64e-06   |
| Rab gtpase activating protein 1                                       | <i>Rabgap1</i>       | 1,97694454 | 0,00603852 |
| Coiled-coil domain containing 120                                     | <i>Ccdc120</i>       | 1,97612518 | 0,00012539 |
| Methylcrotonoyl-coenzyme a carboxylase 1 (alpha)                      | <i>Mccc1</i>         | 1,97601267 | 9,70e-06   |
| Ly6/neurotoxin 1                                                      | <i>Lynx1</i>         | 1,97504325 | 1,30e-05   |
| Tnf receptor-associated protein 1                                     | <i>Trap1</i>         | 1,97502914 | 1,74e-06   |
| Orm1-like 1 (s. Cerevisiae)                                           | <i>Ormdl1</i>        | 1,97493393 | 0,00345037 |
| Junction-mediating and regulatory protein                             | <i>Jmy</i>           | 1,97233387 | 0,0048985  |
| Apurinic/apyrimidinic endonuclease 1                                  | <i>Apex1</i>         | 1,97126885 | 1,33e-06   |
| U2af homology motif (uhm) kinase 1                                    | <i>Uhmk1</i>         | 1,96973632 | 1,33e-05   |
| Ferric-chelate reductase 1                                            | <i>Frrs1</i>         | 1,9691449  | 3,70e-05   |
| Natriuretic peptide receptor 2                                        | <i>Npr2</i>          | 1,96911902 | 5,07e-05   |
| Son of sevenless homolog 2 (drosophila)                               | <i>Sos2</i>          | 1,96878859 | 0,000191   |
| Sry (sex determining region y)-box 12                                 | <i>Sox12</i>         | 1,96776043 | 5,60e-05   |
| Ral gef with ph domain and sh3 binding motif 2                        | <i>Ralgps2</i>       | 1,96768853 | 2,32e-06   |
| Prefoldin 2                                                           | <i>Pfdn2</i>         | 1,9662006  | 1,17e-05   |
| Methylmalonyl-coenzyme a mutase                                       | <i>Mut</i>           | 1,96596954 | 2,17e-05   |
| Tight junction associated protein 1                                   | <i>Tjap1</i>         | 1,9653483  | 6,08e-06   |
| Purine-rich element binding protein g                                 | <i>Purg</i>          | 1,96424172 | 0,00012279 |
| Eyes absent 1 homolog (drosophila)                                    | <i>Eya1</i>          | 1,96199828 | 4,17e-05   |
| Yth domain family 3                                                   | <i>Ythdf3</i>        | 1,96045188 | 3,76e-05   |
| Serine hydroxymethyltransferase 2 (mitochondrial)                     | <i>Shmt2</i>         | 1,95867778 | 4,53e-05   |
| Prostaglandin reductase 2                                             | <i>Ptgr2</i>         | 1,9572713  | 0,00028524 |
| Inhibitor of kappab kinase gamma                                      | <i>Ikbkg</i>         | 1,956831   | 1,37e-06   |
| Riken cdna 0610031j06 gene                                            | <i>0610031j06rik</i> | 1,95567584 | 1,45e-06   |
| Intercellular adhesion molecule 1                                     | <i>Icam1</i>         | 1,95566615 | 0,00013768 |
| X-linked myotubular myopathy gene 1                                   | <i>Mtm1</i>          | 1,95491138 | 0,00070926 |
| Fun14 domain containing 2                                             | <i>Fundc2</i>        | 1,95442194 | 0,00047929 |
| Patatin-like phospholipase domain containing 7                        | <i>Pnpla7</i>        | 1,95351366 | 3,15e-05   |
| Rho-related btb domain containing 2                                   | <i>Rhobtb2</i>       | 1,95180752 | 5,03e-05   |
| Cyclin pas1/pho80 domain containing 1                                 | <i>Cnppd1</i>        | 1,95113151 | 2,58e-06   |
| Sorting nexin 19                                                      | <i>Snx19</i>         | 1,94904987 | 1,14e-05   |
| Coiled-coil domain containing 90b                                     | <i>Ccdc90b</i>       | 1,9467359  | 2,19e-05   |
| Interleukin 4 receptor, alpha                                         | <i>Il4ra</i>         | 1,9464604  | 5,21e-06   |
| Proteasome (prosome, macropain) 26s subunit,                          | <i>Psmc6</i>         | 1,94559311 | 0,00778278 |

|                                                                                     |                      |            |            |
|-------------------------------------------------------------------------------------|----------------------|------------|------------|
| atpase, 6                                                                           |                      |            |            |
| Polymerase (rna) iii (dna directed) polypeptide g like                              | <i>Polr3gl</i>       | 1,9448916  | 0,00074718 |
| Nuclear receptor subfamily 2, group f, member 2                                     | <i>Nr2f2</i>         | 1,94329474 | 0,00314983 |
| Teneurin transmembrane protein 4                                                    | <i>Tenm4</i>         | 1,94313681 | 2,01e-05   |
| Sap30 binding protein                                                               | <i>Sap30bp</i>       | 1,94280117 | 1,21e-05   |
| Polymerase (rna) iii (dna directed) polypeptide e                                   | <i>Polr3e</i>        | 1,94267623 | 1,03e-05   |
| Nme/nm23 nucleoside diphosphate kinase 4                                            | <i>Nme4</i>          | 1,94198739 | 0,00100154 |
| Adp-ribosylation factor guanine nucleotide-exchange factor 1(brefeldin a-inhibited) | <i>Arfgef1</i>       | 1,94117471 | 1,75e-06   |
| Pq loop repeat containing 1                                                         | <i>Pqlc1</i>         | 1,94081941 | 9,50e-06   |
| Growth arrest specific 5                                                            | <i>Gas5</i>          | 1,9408025  | 6,01e-06   |
| Complement component 1, q subcomponent binding protein                              | <i>C1qbp</i>         | 1,94058793 | 1,19e-06   |
| Phosphatidylinositol-5-phosphate 4-kinase, type ii, alpha                           | <i>Pip4k2a</i>       | 1,94056101 | 3,94e-06   |
| Aar2 splicing factor homolog (s. Cerevisiae)                                        | <i>Aar2</i>          | 1,93691175 | 0,00170951 |
| Cyclin m3                                                                           | <i>Cnnm3</i>         | 1,9348957  | 5,43e-06   |
| Nucleolin                                                                           | <i>Ncl</i>           | 1,93452379 | 3,85e-06   |
| Phospholipase a1 member a                                                           | <i>Pla1a</i>         | 1,9338301  | 4,23e-06   |
| Protein inhibitor of activated stat 1                                               | <i>Pias1</i>         | 1,93273309 | 0,00088501 |
| Bro1 domain and caax motif containing                                               | <i>Brox</i>          | 1,9316694  | 2,22e-06   |
| Pdz and lim domain 7                                                                | <i>Pdlim7</i>        | 1,93129751 | 0,00017177 |
| Mitochondrial ribosomal protein s18b                                                | <i>Mrps18b</i>       | 1,92984794 | 4,73e-06   |
| Riken cDNA 5430417122 gene                                                          | <i>5430417122rik</i> | 1,9288781  | 7,98e-06   |
| Interferon gamma induced gtpase                                                     | <i>Igtp</i>          | 1,92887056 | 0,00048463 |
| Yes-associated protein 1                                                            | <i>Yap1</i>          | 1,92749939 | 5,51e-06   |
| Torsin family 4, member a                                                           | <i>Tor4a</i>         | 1,92749801 | 8,85e-06   |
| Motile sperm domain containing 1                                                    | <i>Mospd1</i>        | 1,92667318 | 1,42e-05   |
| Quiescin q6 sulfhydryl oxidase 1                                                    | <i>Qsox1</i>         | 1,92409803 | 5,19e-06   |
| Vacuolar protein sorting 53 (yeast)                                                 | <i>Vps53</i>         | 1,92247784 | 3,02e-06   |
| Zinc finger and btb domain containing 44                                            | <i>Zbtb44</i>        | 1,92108558 | 1,40e-05   |
| Asparagine synthetase domain containing 1                                           | <i>Asnsd1</i>        | 1,92019418 | 1,72e-06   |
| Regulation of nuclear pre-mrna domain containing 1a                                 | <i>Rprd1a</i>        | 1,9197731  | 6,84e-06   |
| Charged multivesicular body protein 1b                                              | <i>Chmp1b</i>        | 1,91885164 | 2,41e-05   |
| Prolyl-trna synthetase (mitochondrial)(putative)                                    | <i>Pars2</i>         | 1,91842823 | 2,51e-05   |
| Re1-silencing transcription factor                                                  | <i>Rest</i>          | 1,91798163 | 0,00386607 |
| Glycerophosphodiester phosphodiesterase domain                                      | <i>Gdpd1</i>         | 1,91782324 | 0,00024488 |

|                                                                              |                 |            |            |
|------------------------------------------------------------------------------|-----------------|------------|------------|
| containing 1                                                                 |                 |            |            |
| Solute carrier family 44, member 1                                           | <i>Slc44a1</i>  | 1,91693794 | 4,18e-05   |
| Mitochondrial ribosomal protein s14                                          | <i>Mrps14</i>   | 1,91626769 | 4,09e-05   |
| Rab8b, member ras oncogene family                                            | <i>Rab8b</i>    | 1,91368277 | 2,07e-05   |
| Transmembrane channel-like gene family 6                                     | <i>Tmc6</i>     | 1,91288485 | 1,51e-05   |
| Yy1 transcription factor                                                     | <i>Yy1</i>      | 1,91192192 | 4,93e-06   |
| Interferon gamma inducible protein 47                                        | <i>Ifi47</i>    | 1,91134944 | 1,01e-05   |
| Formin 1                                                                     | <i>Fmn1</i>     | 1,91124189 | 0,00012715 |
| Reticulocalbin 2                                                             | <i>Rcn2</i>     | 1,9099458  | 0,00117018 |
| Wingless-type mmtv integration site family, member 5b                        | <i>Wnt5b</i>    | 1,90953957 | 0,00174471 |
| Protein-l-isoaspartate (d-aspartate) o-methyltransferase domain containing 1 | <i>Pcmt1</i>    | 1,90953288 | 0,00010298 |
| Emopamil binding protein-like                                                | <i>Ebpl</i>     | 1,90948251 | 5,68e-05   |
| Asparagine synthetase                                                        | <i>Asns</i>     | 1,90891014 | 9,02e-06   |
| Solute carrier family 25, member 51                                          | <i>Slc25a51</i> | 1,9073312  | 3,02e-06   |
| Homeodomain interacting protein kinase 3                                     | <i>Hipk3</i>    | 1,90708481 | 2,29e-05   |
| Chromobox 8                                                                  | <i>Cbx8</i>     | 1,90624227 | 7,46e-06   |
| Ras-like, family 12                                                          | <i>Rasl12</i>   | 1,90418528 | 1,36e-05   |
| Solute carrier family 12, member 5                                           | <i>Slc12a5</i>  | 1,90343786 | 4,92e-06   |
| Zinc finger protein 568                                                      | <i>Zfp568</i>   | 1,90279833 | 0,00711548 |
| Kelch-like 26                                                                | <i>Klhl26</i>   | 1,90229357 | 1,07e-05   |
| Marcks-like 1                                                                | <i>Marcksl1</i> | 1,90214214 | 2,83e-05   |
| Rab interacting lysosomal protein-like 1                                     | <i>Rilpl1</i>   | 1,90102094 | 0,00032569 |
| Von willebrand factor a domain containing 8                                  | <i>Vwa8</i>     | 1,90011103 | 0,00170951 |
| Cytosolic iron-sulfur protein assembly 1                                     | <i>Ciao1</i>    | 1,89928847 | 3,10e-06   |
| Mitochondrial ribosomal protein l46                                          | <i>Mrpl46</i>   | 1,89755174 | 7,81e-06   |
| Tgf-beta activated kinase 1/map3k7 binding protein 3                         | <i>Tab3</i>     | 1,89732504 | 2,90e-05   |
| Wingless-type mmtv integration site family, member 5a                        | <i>Wnt5a</i>    | 1,89699176 | 3,67e-05   |
| Ubiquitin carboxyl-terminal esterase l5                                      | <i>Uchl5</i>    | 1,89670625 | 0,00013448 |
| Tripartite motif-containing 44                                               | <i>Trim44</i>   | 1,89617679 | 2,52e-06   |
| Dnaj (hsp40) homolog, subfamily c, member 27                                 | <i>Dnajc27</i>  | 1,89507105 | 0,00030648 |
| Methyltransferase like 21a                                                   | <i>Mettl21a</i> | 1,89409923 | 7,63e-05   |
| Transmembrane protein 141                                                    | <i>Tmem141</i>  | 1,89399347 | 3,98e-06   |
| Islet cell autoantigen 1                                                     | <i>Ica1</i>     | 1,8935146  | 0,00128686 |
| Calpain 1                                                                    | <i>Capn1</i>    | 1,89335381 | 0,00078186 |

|                                                               |                      |            |            |
|---------------------------------------------------------------|----------------------|------------|------------|
| Tudor domain containing 7                                     | <i>Tdrd7</i>         | 1,89296003 | 1,12e-05   |
| Activating transcription factor 5                             | <i>Atf5</i>          | 1,89227153 | 0,0003796  |
| Cytochrome c oxidase subunit vib polypeptide 2                | <i>Cox6b2</i>        | 1,89215999 | 0,00116435 |
| Laminin, alpha 5                                              | <i>Lama5</i>         | 1,89116309 | 2,91e-05   |
| Ubiquilin 4                                                   | <i>Ubqln4</i>        | 1,88998809 | 0,00088277 |
| Glutamine and serine rich 1                                   | <i>Qser1</i>         | 1,88931555 | 0,00023654 |
| Cathepsin a                                                   | <i>Ctsa</i>          | 1,88856256 | 1,62e-06   |
| Bifunctional apoptosis regulator                              | <i>Bfar</i>          | 1,88845523 | 6,58e-05   |
| Notch 2                                                       | <i>Notch2</i>        | 1,88767149 | 3,22e-05   |
| Porcupine homolog (drosophila)                                | <i>Porcn</i>         | 1,8863939  | 7,11e-05   |
| Growth arrest and dna-damage-inducible 45 gamma               | <i>Gadd45g</i>       | 1,8863859  | 2,30e-05   |
| Mitochondrial ribosomal protein l38                           | <i>Mrpl38</i>        | 1,88573554 | 5,01e-05   |
| N(alpha)-acetyltransferase 15, nata auxiliary subunit         | <i>Naa15</i>         | 1,88531369 | 5,40e-05   |
| Zinc finger protein 51                                        | <i>Zfp51</i>         | 1,88458488 | 0,00098041 |
| Angiomotin-like 2                                             | <i>Amotl2</i>        | 1,88395137 | 4,32e-06   |
| Microfibrillar-associated protein 3                           | <i>Mfap3</i>         | 1,88331003 | 7,22e-05   |
| Myosin va                                                     | <i>Myo5a</i>         | 1,88286796 | 3,15e-06   |
| Vasohibin 2                                                   | <i>Vash2</i>         | 1,88220488 | 3,31e-06   |
| Guanine nucleotide binding protein, alpha 14                  | <i>Gna14</i>         | 1,88183149 | 0,00016674 |
| Leptin receptor overlapping transcript-like 1                 | <i>Leprotl1</i>      | 1,88140221 | 5,26e-05   |
| Triggering receptor expressed on myeloid cells 2              | <i>Trem2</i>         | 1,88126401 | 2,79e-05   |
| Clusterin associated protein 1                                | <i>Cluap1</i>        | 1,87865722 | 8,09e-06   |
| Predicted gene 561                                            | <i>Gm561</i>         | 1,87857639 | 1,64e-05   |
| Cytohesin 1                                                   | <i>Cyth1</i>         | 1,87808912 | 8,90e-06   |
| Ribulose-5-phosphate-3-epimerase                              | <i>Rpe</i>           | 1,87755326 | 3,91e-05   |
| Riken cdna 2310061i04 gene                                    | <i>2310061i04rik</i> | 1,87752043 | 0,00017109 |
| Special at-rich sequence binding protein 1                    | <i>Satb1</i>         | 1,8767446  | 0,00033854 |
| Zinc finger and scan domain containing 26                     | <i>Zscan26</i>       | 1,87620657 | 6,16e-05   |
| Riken cdna 9430016h08 gene                                    | <i>9430016h08rik</i> | 1,87592476 | 4,52e-05   |
| Expressed sequence c79468                                     | <i>C79468</i>        | 1,87553705 | 9,57e-05   |
| Trinucleotide repeat containing 6c                            | <i>Tnrc6c</i>        | 1,87441889 | 6,16e-05   |
| Sphingomyelin phosphodiesterase 1, acid lysosomal             | <i>Smpd1</i>         | 1,87386504 | 2,74e-06   |
| Carnitine deficiency-associated gene expressed in ventricle 3 | <i>Cdv3</i>          | 1,87358895 | 3,89e-06   |
| Cleavage and polyadenylation specific factor 2                | <i>Cpsf2</i>         | 1,87243912 | 1,32e-05   |
| Reticulocalbin 3, ef-hand calcium binding domain              | <i>Rcn3</i>          | 1,87203228 | 6,22e-06   |
| Leucine-rich repeat-containing g protein-coupled receptor 6   | <i>Lgr6</i>          | 1,87191785 | 0,0001142  |

|                                                                                            |                                            |            |            |
|--------------------------------------------------------------------------------------------|--------------------------------------------|------------|------------|
| Chloride channel 5                                                                         | <i>Clcn5</i>                               | 1,87174038 | 6,30e-06   |
| Dual serine/threonine and tyrosine protein kinase                                          | <i>Dstyk</i>                               | 1,87170824 | 0,00021367 |
| Adrenergic receptor, beta 2                                                                | <i>Adrb2</i>                               | 1,87156247 | 0,00141359 |
| Serine (or cysteine) peptidase inhibitor, clade f, member 1                                | <i>Serpinf1</i>                            | 1,8709312  | 0,00010729 |
| Bisphosphate 3'-nucleotidase 1                                                             | <i>Bpnt1</i>                               | 1,86787628 | 0,00040509 |
| Nima (never in mitosis gene a)-related expressed kinase 6                                  | <i>Nek6</i>                                | 1,86713    | 3,19e-05   |
| Pdz and lim domain 5                                                                       | <i>Pdlim5</i>                              | 1,86650222 | 3,69e-05   |
| Ccaat/enhancer binding protein (c/ebp), gamma                                              | <i>Cebpg</i>                               | 1,86536064 | 1,81e-05   |
| Discoidin, cub and lccl domain containing 1                                                | <i>Dcbl1</i>                               | 1,86529668 | 1,47e-05   |
| Galactosidase, beta 1-like                                                                 | <i>Glb1l</i>                               | 1,8643815  | 0,00038509 |
| Lysophosphatidylglycerol acyltransferase 1                                                 | <i>Lpgat1</i>                              | 1,86432765 | 5,41e-06   |
| Predicted gene 16340 /// interferon activated gene 203 /// flocculation protein flo11-like | <i>Gm16340 /// ifi203 /// loc100862473</i> | 1,86416651 | 0,0008688  |
| Sec16 homolog a (s. Cerevisiae)                                                            | <i>Sec16a</i>                              | 1,86408865 | 2,31e-06   |
| Coiled-coil serine rich 2                                                                  | <i>Ccser2</i>                              | 1,86202329 | 1,60e-05   |
| Phospholipid scramblase 1                                                                  | <i>Plscr1</i>                              | 1,86154583 | 6,54e-05   |
| Factor 8-associated gene a                                                                 | <i>F8a</i>                                 | 1,86033692 | 8,01e-05   |
| Family with sequence similarity 102, member a                                              | <i>Fam102a</i>                             | 1,86017053 | 5,48e-05   |
| Intermediate filament family orphan 1                                                      | <i>Iffo1</i>                               | 1,85870504 | 0,00038508 |
| Related ras viral (r-ras) oncogene homolog 2                                               | <i>Rras2</i>                               | 1,85802581 | 0,00020545 |
| Beta-2 microglobulin                                                                       | <i>B2m</i>                                 | 1,85740118 | 8,47e-06   |
| Heparan sulfate (glucosamine) 3-o-sulfotransferase 1                                       | <i>Hs3st1</i>                              | 1,85723606 | 9,03e-05   |
| Tetratricopeptide repeat domain 13                                                         | <i>Ttc13</i>                               | 1,85669977 | 2,30e-06   |
| Tcf3 (e2a) fusion partner                                                                  | <i>Tfpt</i>                                | 1,85653159 | 0,00140843 |
| Udp-glucose glycoprotein glucosyltransferase 2                                             | <i>Uggf2</i>                               | 1,85554195 | 8,49e-05   |
| Lim domains containing 1                                                                   | <i>Limd1</i>                               | 1,85506911 | 5,41e-05   |
| Patched homolog 1                                                                          | <i>Ptch1</i>                               | 1,85486794 | 6,70e-05   |
| Phosphatidylinositol 3-kinase, regulatory subunit, polypeptide 1 (p85 alpha)               | <i>Pik3r1</i>                              | 1,85475965 | 7,96e-05   |
| Glucosamine (udp-n-acetyl)-2-epimerase/n-acetylmannosamine kinase                          | <i>Gne</i>                                 | 1,85454355 | 0,00014786 |
| F-box protein 22                                                                           | <i>Fbxo22</i>                              | 1,8539993  | 1,03e-05   |
| Mitochondrial trans-2-enoyl-coa reductase                                                  | <i>Mecr</i>                                | 1,85356583 | 0,00014138 |
| Sorbin and sh3 domain containing 1                                                         | <i>Sorbs1</i>                              | 1,85283526 | 8,82e-06   |
| Rho gtpase activating protein 39                                                           | <i>Arhgap39</i>                            | 1,85258602 | 9,06e-05   |
| Pinin                                                                                      | <i>Pnn</i>                                 | 1,85192948 | 0,00303645 |



|                                                                        |                   |            |            |
|------------------------------------------------------------------------|-------------------|------------|------------|
| Coiled-coil domain containing 58                                       | <i>Ccdc58</i>     | 1,85186026 | 4,55e-06   |
| Mitochondrial ribosomal protein l15                                    | <i>Mrpl15</i>     | 1,85044292 | 4,22e-06   |
| Neural precursor cell expressed, developmentally down-regulated gene 9 | <i>Nedd9</i>      | 1,84864534 | 0,00315988 |
| Tubulin folding cofactor e-like                                        | <i>Tbcel</i>      | 1,84864194 | 4,76e-05   |
| Protein phosphatase 4, regulatory subunit 2                            | <i>Ppp4r2</i>     | 1,84715366 | 1,42e-05   |
| Zinc finger protein 772                                                | <i>Zfp772</i>     | 1,84654622 | 0,00058675 |
| Atpase, cu++ transporting, alpha polypeptide                           | <i>Atp7a</i>      | 1,84546566 | 2,93e-05   |
| Immunoglobulin superfamily containing leucine-rich repeat              | <i>Islr</i>       | 1,84444764 | 0,00095311 |
| Phosphatidylinositol glycan anchor biosynthesis, class n               | <i>Pign</i>       | 1,84409844 | 7,59e-05   |
| Signal transducing adaptor molecule (sh3 domain and itam motif) 1      | <i>Stam</i>       | 1,84332543 | 9,17e-05   |
| Saccharopine dehydrogenase (putative)                                  | <i>Sccpdh</i>     | 1,8429117  | 0,00048315 |
| Syntaxin 6                                                             | <i>Stx6</i>       | 1,84265917 | 5,52e-06   |
| Carboxypeptidase d                                                     | <i>Cpd</i>        | 1,84227762 | 0,00697106 |
| Casitas b-lineage lymphoma-like 1                                      | <i>Cbll1</i>      | 1,84106779 | 0,00029412 |
| Histocompatibility 2, t region locus 10 ///                            | <i>H2-t10 ///</i> | 1,84082007 | 9,47e-06   |
| histocompatibility 2, t region locus 22 ///                            | <i>h2-t9</i>      |            |            |
| histocompatibility 2, t region locus 9                                 |                   |            |            |
| Mitochondrial fission factor                                           | <i>Mff</i>        | 1,83983293 | 4,38e-05   |
| Transmembrane protein 140                                              | <i>Tmem140</i>    | 1,83966802 | 3,13e-05   |
| Carbohydrate (n-acetylgalactosamine 4-0) sulfotransferase 14           | <i>Chst14</i>     | 1,83911699 | 4,65e-06   |
| Gata binding protein 3                                                 | <i>Gata3</i>      | 1,8390663  | 0,00019889 |
| Nephronophthisis 1 (juvenile) homolog (human)                          | <i>Nphp1</i>      | 1,83774295 | 2,82e-05   |
| Dead (asp-glu-ala-asp) box polypeptide 10                              | <i>Ddx10</i>      | 1,837632   | 0,00029506 |
| Zinc finger protein 955b                                               | <i>Zfp955b</i>    | 1,83745527 | 0,00027516 |
| Rna polymerase ii associated protein 2                                 | <i>Rpap2</i>      | 1,83685827 | 5,24e-05   |
| Fucose mutarotase                                                      | <i>Fuom</i>       | 1,83593404 | 1,32e-05   |
| Talin 1                                                                | <i>Tln1</i>       | 1,83588629 | 0,00382046 |
| Orosomucoid 1                                                          | <i>Orm1</i>       | 1,8345976  | 0,00010753 |
| Mitochondrial carrier homolog 2 (c. Elegans)                           | <i>Mtch2</i>      | 1,83457681 | 0,0002958  |
| Ring finger and fyve like domain containing protein                    | <i>Rffl</i>       | 1,83345278 | 5,99e-05   |
| Fast kinase domains 2                                                  | <i>Fastkd2</i>    | 1,83266135 | 1,29e-05   |
| Oxidoreductase nad-binding domain containing 1                         | <i>Oxnad1</i>     | 1,83198746 | 0,00010752 |
| Protein-tyrosine sulfotransferase 2                                    | <i>Tpst2</i>      | 1,82939128 | 2,26e-06   |

|                                                                                              |                                 |            |            |
|----------------------------------------------------------------------------------------------|---------------------------------|------------|------------|
| Tumor necrosis factor receptor superfamily, member 22                                        | <i>Tnfrsf22</i>                 | 1,82904944 | 0,00234243 |
| Solute carrier family 25, member 36                                                          | <i>Slc25a36</i>                 | 1,82851535 | 0,00038753 |
| S-adenosylhomocysteine hydrolase-like 2                                                      | <i>Ahcyl2</i>                   | 1,82755199 | 9,02e-06   |
| Zinc finger protein x-linked                                                                 | <i>Zfx</i>                      | 1,82707453 | 3,12e-05   |
| Tetraspanin 12                                                                               | <i>Tspan12</i>                  | 1,82688018 | 0,00016344 |
| Ubiquitin-conjugating enzyme e2f (putative)                                                  | <i>Ube2f</i>                    | 1,82616718 | 1,45e-05   |
| Calcium and integrin binding family member 2                                                 | <i>Cib2</i>                     | 1,82609522 | 4,14e-05   |
| Rhotekin 2                                                                                   | <i>Rtkn2</i>                    | 1,82549461 | 0,00010706 |
| Phosphatidylserine decarboxylase, pseudogene 3                                               | <i>Pisd-ps3</i>                 | 1,82506731 | 6,53e-06   |
| Carboxypeptidase x 2 (m14 family)                                                            | <i>Cpxm2</i>                    | 1,82363822 | 0,00210494 |
| Riken cdna 4933434e20 gene /// predicted gene 7664                                           | <i>4933434e20rik /// gm7664</i> | 1,82289942 | 0,00025207 |
| Phosducin-like                                                                               | <i>Pdcl</i>                     | 1,82262245 | 0,00020372 |
| Lim motif-containing protein kinase 2                                                        | <i>Limk2</i>                    | 1,82260956 | 9,31e-06   |
| Family with sequence similarity 13, member b                                                 | <i>Fam13b</i>                   | 1,82201376 | 5,81e-05   |
| Protein phosphatase 1, regulatory (inhibitor) subunit 8                                      | <i>Ppp1r8</i>                   | 1,82180715 | 0,00783975 |
| Aarf domain containing kinase 4                                                              | <i>Adck4</i>                    | 1,82170795 | 2,42e-05   |
| Degenerative spermatocyte homolog 1 (drosophila)                                             | <i>Degs1</i>                    | 1,82170137 | 0,00025367 |
| Polymerase (rna) i polypeptide b                                                             | <i>Polr1b</i>                   | 1,82144937 | 1,75e-05   |
| Ubx domain protein 2b                                                                        | <i>Ubxn2b</i>                   | 1,82141218 | 0,00059713 |
| Cdk5 regulatory subunit associated protein 1                                                 | <i>Cdk5rap1</i>                 | 1,82097184 | 0,00026947 |
| Branched chain aminotransferase 1, cytosolic                                                 | <i>Bcat1</i>                    | 1,82064344 | 3,09e-05   |
| Syntaxin 17                                                                                  | <i>Stx17</i>                    | 1,82029433 | 7,90e-05   |
| Fibronectin 1                                                                                | <i fn1<="" i=""></i>            | 1,82023237 | 0,00011428 |
| Protein kinase, x-linked                                                                     | <i>Prkx</i>                     | 1,81981683 | 9,31e-05   |
| Major vault protein                                                                          | <i>Mvp</i>                      | 1,81921022 | 0,00036285 |
| Asparagine-linked glycosylation 2 (alpha-1,3-mannosyltransferase)                            | <i>Alg2</i>                     | 1,81891788 | 0,0081993  |
| Biregional cell adhesion molecule-related/down-regulated by oncogenes (cdon) binding protein | <i>Boc</i>                      | 1,817702   | 0,00024448 |
| Eukaryotic translation initiation factor 1a                                                  | <i>Eif1a</i>                    | 1,81748451 | 0,00015892 |
| Gtpase activating protein (sh3 domain) binding protein 1                                     | <i>G3bp1</i>                    | 1,81725838 | 4,44e-05   |
| Zinc finger with krab and scan domains 6                                                     | <i>Zkscan6</i>                  | 1,81562063 | 3,56e-05   |
| Nischarin                                                                                    | <i>Nisch</i>                    | 1,81506545 | 0,00196462 |
| Cytochrome c oxidase subunit viia polypeptide 2-                                             | <i>Cox7a2l</i>                  | 1,81495039 | 3,69e-06   |

|                                                                                     |                |            |            |
|-------------------------------------------------------------------------------------|----------------|------------|------------|
| like                                                                                |                |            |            |
| A disintegrin and metallopeptidase domain 12 (meltrin alpha)                        | <i>Adam12</i>  | 1,81415906 | 0,00083349 |
| Family with sequence similarity 122, member a                                       | <i>Fam122a</i> | 1,81378683 | 0,00087704 |
| Dehydrogenase/reductase (sdr family) member 3                                       | <i>Dhrs3</i>   | 1,81367905 | 6,75e-05   |
| Aspartyl aminopeptidase                                                             | <i>Dnpep</i>   | 1,81367042 | 4,18e-06   |
| Eukaryotic translation initiation factor 3, subunit c                               | <i>Eif3c</i>   | 1,81257343 | 6,68e-06   |
| Leukemia inhibitory factor receptor                                                 | <i>Lifr</i>    | 1,81096424 | 0,00068855 |
| Hig1 domain family, member 1a                                                       | <i>Higd1a</i>  | 1,81069341 | 0,00013414 |
| Endoplasmic reticulum chaperone sil1 homolog (s. Cerevisiae)                        | <i>Sil1</i>    | 1,81016832 | 4,42e-06   |
| Protein phosphatase 1, regulatory (inhibitor) subunit 7                             | <i>Ppp1r7</i>  | 1,80898532 | 3,40e-05   |
| Sulfatase modifying factor 1                                                        | <i>Sumf1</i>   | 1,80812974 | 1,49e-05   |
| Armadillo repeat containing 10                                                      | <i>Armc10</i>  | 1,80778399 | 7,73e-06   |
| Xylosyltransferase ii                                                               | <i>Xylt2</i>   | 1,80741995 | 0,00093722 |
| Suppressor apc domain containing 1                                                  | <i>Sapcd1</i>  | 1,80727509 | 0,00020322 |
| Mad2 mitotic arrest deficient-like 2                                                | <i>Mad2l2</i>  | 1,80704001 | 0,00032962 |
| Heparan-alpha-glucosaminide n-acetyltransferase                                     | <i>Hgsnat</i>  | 1,80688867 | 1,81e-05   |
| Makorin, ring finger protein, 3                                                     | <i>Mkri3</i>   | 1,80668265 | 0,00035831 |
| Udp-n-acetyl-alpha-d-galactosamine:polypeptide n-acetylgalactosaminyltransferase 10 | <i>Galnt10</i> | 1,80634677 | 8,71e-06   |
| Matrix metallopeptidase 11                                                          | <i>Mmp11</i>   | 1,80552405 | 5,03e-05   |
| Lectin, galactoside binding-like                                                    | <i>Lgalsl</i>  | 1,8054807  | 3,11e-05   |
| Myod family inhibitor domain containing                                             | <i>Mdfic</i>   | 1,80479581 | 0,00011501 |
| Utp6, small subunit (ssu) processome component, homolog (yeast)                     | <i>Utp6</i>    | 1,8044762  | 9,15e-06   |
| Nlr family, apoptosis inhibitory protein 1                                          | <i>Naip1</i>   | 1,80424224 | 0,0001519  |
| Protein phosphatase 3, catalytic subunit, alpha isoform                             | <i>Ppp3ca</i>  | 1,804229   | 1,42e-05   |
| Carnitine palmitoyltransferase 2                                                    | <i>Cpt2</i>    | 1,80331818 | 1,00e-05   |
| Cysteine rich transmembrane bmp regulator 1 (chordin like)                          | <i>Crim1</i>   | 1,80132176 | 0,00010268 |
| Ga repeat binding protein, beta 1                                                   | <i>Gabpb1</i>  | 1,80063343 | 0,00599417 |
| Ring finger protein 7                                                               | <i>Rnf7</i>    | 1,79968767 | 8,90e-06   |
| Mature t cell proliferation 1                                                       | <i>Mtcp1</i>   | 1,79952895 | 8,71e-06   |
| Sestrin 2                                                                           | <i>Sesn2</i>   | 1,79946126 | 0,00070766 |
| Par-3 family cell polarity regulator                                                | <i>Pard3</i>   | 1,79931216 | 0,00179308 |

|                                                                  |                 |            |            |
|------------------------------------------------------------------|-----------------|------------|------------|
| Prolyl endopeptidase-like                                        | <i>Prepl</i>    | 1,79885694 | 6,99e-06   |
| Guanine nucleotide binding protein, alpha 13                     | <i>Gna13</i>    | 1,79884035 | 0,00015361 |
| Udp-gal:betaglcnac beta 1,4-galactosyltransferase, polypeptide 4 | <i>B4galt4</i>  | 1,79819451 | 0,00017091 |
| Aldehyde oxidase 1                                               | <i>Aox1</i>     | 1,79711723 | 0,00098955 |
| Ethylmalonic encephalopathy 1                                    | <i>Ethe1</i>    | 1,79658025 | 1,65e-05   |
| Atpase, ca++ transporting, cardiac muscle, slow twitch 2         | <i>Atp2a2</i>   | 1,79647409 | 0,00010901 |
| Retinoblastoma binding protein 9                                 | <i>Rbbp9</i>    | 1,7961037  | 0,00197014 |
| Sestrin 3                                                        | <i>Sesn3</i>    | 1,79490424 | 6,73e-06   |
| Rho gtpase activating protein 5                                  | <i>Arhgap5</i>  | 1,79483879 | 9,02e-05   |
| Cytochrome c oxidase assembly factor 5                           | <i>Coa5</i>     | 1,79398618 | 1,97e-05   |
| Cytochrome p450, family 27, subfamily a, polypeptide 1           | <i>Cyp27a1</i>  | 1,79333547 | 0,00803329 |
| T cell lymphoma invasion and metastasis 2                        | <i>Tiam2</i>    | 1,79292947 | 0,00062397 |
| Phospholipase a2, group v                                        | <i>Pla2g5</i>   | 1,79244675 | 0,00323344 |
| Lipase maturation factor 1                                       | <i>Lmf1</i>     | 1,7916897  | 6,53e-05   |
| Arp1 actin-related protein 1b, centractin beta                   | <i>Actr1b</i>   | 1,79164824 | 0,00675883 |
| Discs, large homolog 4 (drosophila)                              | <i>Dlg4</i>     | 1,79079946 | 0,00082852 |
| N-terminal xaa-pro-lys n-methyltransferase 1                     | <i>Ntmt1</i>    | 1,79055196 | 2,34e-05   |
| Pre b cell leukemia homeobox 1                                   | <i>Pbx1</i>     | 1,78915495 | 0,00024741 |
| Proteasome (prosome, macropain) activator subunit 1 (pa28 alpha) | <i>Psme1</i>    | 1,78867308 | 5,86e-05   |
| Elk4, member of ets oncogene family                              | <i>Elk4</i>     | 1,78861744 | 1,32e-05   |
| Atpase, h+ transporting, lysosomal v1 subunit b2                 | <i>Atp6v1b2</i> | 1,78834674 | 2,97e-05   |
| Arrestin, beta 2                                                 | <i>Arrb2</i>    | 1,78783694 | 0,00186682 |
| Dual-specificity tyrosine-(y)-phosphorylation regulated kinase 3 | <i>Dyrk3</i>    | 1,78774332 | 3,79e-05   |
| Xanthine dehydrogenase                                           | <i>Xdh</i>      | 1,78694504 | 2,44e-05   |
| Praja ring finger 1, e3 ubiquitin protein ligase                 | <i>Pja1</i>     | 1,78682968 | 0,00015253 |
| Guanine nucleotide binding protein-like 2 (nucleolar)            | <i>Gnl2</i>     | 1,78680011 | 0,00030921 |
| Mitochondrial ribosomal protein s34                              | <i>Mrps34</i>   | 1,78669681 | 1,16e-05   |
| Glucuronidase, beta                                              | <i>Gusb</i>     | 1,78563022 | 0,00039128 |
| Peroxiredoxin 5                                                  | <i>Prdx5</i>    | 1,78552158 | 1,45e-05   |
| Tsukushi                                                         | <i>Tsku</i>     | 1,7852994  | 0,00474787 |
| Bbsome interacting protein 1                                     | <i>Bbip1</i>    | 1,78445935 | 0,00047534 |
| N(alpha)-acetyltransferase 30, natc catalytic subunit            | <i>Naa30</i>    | 1,78403966 | 0,00128437 |

|                                                                                                                |                                                     |            |            |
|----------------------------------------------------------------------------------------------------------------|-----------------------------------------------------|------------|------------|
| Homeodomain interacting protein kinase 1                                                                       | <i>Hipk1</i>                                        | 1,78338909 | 9,04e-06   |
| Uncharacterized loc102643023 /// microfibrillar-associated protein 1a /// microfibrillar-associated protein 1b | <i>Loc102643023 ///</i><br><i>mfap1a /// mfap1b</i> | 1,78337887 | 4,50e-06   |
| Predicted gene 15776 /// guanine nucleotide binding protein (g protein), gamma 5                               | <i>Gm15776 /// gng5</i>                             | 1,78259967 | 8,52e-06   |
| Angio-associated migratory protein                                                                             | <i>Aamp</i>                                         | 1,78234121 | 5,60e-06   |
| Rosbin, round spermatid basic protein 1                                                                        | <i>Rsbm1</i>                                        | 1,78086119 | 1,42e-05   |
| Galactose-1-phosphate uridyl transferase                                                                       | <i>Galt</i>                                         | 1,78058857 | 0,00011418 |
| Zinc finger, ran-binding domain containing 2                                                                   | <i>Zranb2</i>                                       | 1,77948637 | 3,46e-05   |
| Solute carrier family 35, member a5                                                                            | <i>Slc35a5</i>                                      | 1,77943275 | 4,18e-05   |
| Inhibitor of dna binding 1                                                                                     | <i>Id1</i>                                          | 1,77930679 | 0,00028336 |
| Sid1 transmembrane family, member 2                                                                            | <i>Sid12</i>                                        | 1,77858222 | 2,15e-05   |
| Glycosyltransferase 25 domain containing 1                                                                     | <i>Glt25d1</i>                                      | 1,77835577 | 0,00066438 |
| Ets variant 3                                                                                                  | <i>Etv3</i>                                         | 1,777748   | 0,0002542  |
| Coenzyme q9 homolog (yeast)                                                                                    | <i>Coq9</i>                                         | 1,77709783 | 1,80e-05   |
| Myb/sant-like dna-binding domain containing 4 with coiled-coils                                                | <i>Msantd4</i>                                      | 1,7760209  | 0,00025499 |
| Ankyrin repeat domain 40                                                                                       | <i>Ankrd40</i>                                      | 1,77597872 | 9,88e-06   |
| Small integral membrane protein 8                                                                              | <i>Smim8</i>                                        | 1,77592186 | 0,00016264 |
| Amyloid beta (a4) precursor-like protein 1                                                                     | <i>Aplp1</i>                                        | 1,77568568 | 0,00437335 |
| Trna methyltransferase 1                                                                                       | <i>Trmt1</i>                                        | 1,77531822 | 0,00011634 |
| Transporter 1, atp-binding cassette, sub-family b (mdr/tap)                                                    | <i>Tap1</i>                                         | 1,77459885 | 9,02e-05   |
| Mpv17 transgene, kidney disease mutant-like                                                                    | <i>Mpv17l</i>                                       | 1,77432086 | 8,20e-05   |
| Rho gtpase activating protein 24                                                                               | <i>Arhgap24</i>                                     | 1,77348129 | 0,0019343  |
| Ef-hand calcium binding domain 2                                                                               | <i>Efcab2</i>                                       | 1,77151079 | 0,00010168 |
| Thrombospondin, type i, domain 1                                                                               | <i>Thsd1</i>                                        | 1,77046546 | 0,00071858 |
| Transcription factor b2, mitochondrial                                                                         | <i>Tfb2m</i>                                        | 1,77013125 | 5,74e-06   |
| Low density lipoprotein receptor class a domain containing 4                                                   | <i>Ldlrad4</i>                                      | 1,76925933 | 0,0004006  |
| G protein-coupled receptor 137b, pseudogene                                                                    | <i>Gpr137b-ps</i>                                   | 1,76908677 | 1,04e-05   |
| Demethyl-q 7                                                                                                   | <i>Coq7</i>                                         | 1,76770622 | 8,37e-06   |
| Berardinelli-seip congenital lipodystrophy 2 homolog (seipin)                                                  | <i>Bslc2</i>                                        | 1,76765507 | 8,69e-05   |
| Actin, alpha 2, smooth muscle, aorta                                                                           | <i>Acta2</i>                                        | 1,76467939 | 0,0001946  |
| Transmembrane protein 62                                                                                       | <i>Tmem62</i>                                       | 1,76464719 | 0,0001288  |
| Pseudouridine synthase 1                                                                                       | <i>Pus1</i>                                         | 1,7640122  | 1,48e-05   |

|                                                                    |                                 |            |            |
|--------------------------------------------------------------------|---------------------------------|------------|------------|
| Coactosin-like 1 (dictyostelium)                                   | <i>Cotl1</i>                    | 1,76397667 | 0,00294866 |
| Rfad1, flavin adenine dinucleotide synthetase, homolog (yeast)     | <i>Flad1</i>                    | 1,76347623 | 1,83e-05   |
| Methyltransferase like 18                                          | <i>Mettl18</i>                  | 1,76315411 | 2,68e-05   |
| Protein tyrosine phosphatase, mitochondrial 1                      | <i>Ptpmt1</i>                   | 1,76297815 | 4,23e-05   |
| Rna binding motif protein 43                                       | <i>Rbm43</i>                    | 1,76257015 | 0,00760219 |
| Riken cdna 2610201a13 gene                                         | <i>2610201a13rik</i>            | 1,76248783 | 5,37e-05   |
| Leucine rich repeat containing 1                                   | <i>Lrrc1</i>                    | 1,76123208 | 0,00010476 |
| Dystroglycan 1                                                     | <i>Dag1</i>                     | 1,76042878 | 2,97e-05   |
| Atpase, h <sup>+</sup> transporting, lysosomal accessory protein 1 | <i>Atp6ap1</i>                  | 1,76016897 | 8,91e-06   |
| Riken cdna 4632428n05 gene                                         | <i>4632428n05rik</i>            | 1,75934085 | 0,00018801 |
| Peptide deformylase (mitochondrial)                                | <i>Pdf</i>                      | 1,75924988 | 5,40e-05   |
| Predicted gene 12538 /// orm1-like 3 (s. Cerevisiae)               | <i>Gm12538 /// ormdl3</i>       | 1,75841955 | 1,49e-05   |
| Zinc finger protein 30                                             | <i>Zfp30</i>                    | 1,75759168 | 0,00012548 |
| Cyclin-dependent kinase 9 (cdc2-related kinase)                    | <i>Cdk9</i>                     | 1,7573405  | 9,59e-06   |
| Histone cluster 2, h2aa2                                           | <i>Hist2h2aa2</i>               | 1,75727845 | 2,14e-05   |
| Methionyl aminopeptidase type 1d (mitochondrial)                   | <i>Metap1d</i>                  | 1,75726596 | 5,54e-05   |
| Rar-related orphan receptor alpha                                  | <i>Rora</i>                     | 1,75705319 | 0,00018822 |
| Ph domain and leucine rich repeat protein phosphatase 1            | <i>Phlpp1</i>                   | 1,75674029 | 2,30e-05   |
| Zinc finger protein 189                                            | <i>Zfp189</i>                   | 1,75668133 | 0,00021987 |
| Cklf-like marvel transmembrane domain containing 6                 | <i>Cmtm6</i>                    | 1,75667664 | 0,00024416 |
| Like-glycosyltransferase                                           | <i>Large</i>                    | 1,75525205 | 0,00135264 |
| Zinc finger protein 940                                            | <i>Zfp940</i>                   | 1,75476649 | 0,0039072  |
| Plexin a2                                                          | <i>Plxna2</i>                   | 1,75475041 | 3,50e-05   |
| Riken cdna 2700062c07 gene /// predicted gene 9182                 | <i>2700062c07rik /// gm9182</i> | 1,75453046 | 0,00017161 |
| Phosphodiesterase 4b, camp specific                                | <i>Pde4b</i>                    | 1,75449635 | 0,00064201 |
| Interleukin enhancer binding factor 2                              | <i>Ilf2</i>                     | 1,75435544 | 0,00013448 |
| Synaptotagmin vii                                                  | <i>Syt7</i>                     | 1,75361497 | 7,07e-05   |
| Vasorin                                                            | <i>Vasn</i>                     | 1,7528329  | 0,00010363 |
| Snf related kinase                                                 | <i>Snrk</i>                     | 1,75275646 | 2,78e-05   |
| Solute carrier family 22, member 23                                | <i>Slc22a23</i>                 | 1,75274832 | 1,61e-05   |
| Eggy carbohydrate kinase domain containing                         | <i>Eggy</i>                     | 1,75256411 | 3,68e-05   |
| Granulin                                                           | <i>Grn</i>                      | 1,75190893 | 9,42e-06   |
| Kinase suppressor of ras 1                                         | <i>Ksr1</i>                     | 1,75115012 | 0,00146883 |

|                                                                        |                      |            |            |
|------------------------------------------------------------------------|----------------------|------------|------------|
| Ccaat/enhancer binding protein zeta                                    | <i>Cebpz</i>         | 1,75066836 | 0,00011025 |
| Tetraspanin 3                                                          | <i>Tspan3</i>        | 1,75061077 | 4,14e-06   |
| Mitogen-activated protein kinase associated protein 1                  | <i>Mapkap1</i>       | 1,7505302  | 0,00049273 |
| Zinc finger protein 148                                                | <i>Zfp148</i>        | 1,74983794 | 0,00010831 |
| Neuron derived neurotrophic factor                                     | <i>Nenf</i>          | 1,74933964 | 0,00021421 |
| Ribosomal protein s6 kinase polypeptide 1                              | <i>Rps6kc1</i>       | 1,74885145 | 0,00055001 |
| Sarcospan                                                              | <i>Sspn</i>          | 1,7482252  | 0,00012518 |
| F-box and wd-40 domain protein 5                                       | <i>Fbxw5</i>         | 1,7475671  | 0,00471572 |
| Histocompatibility 2, class ii antigen e beta                          | <i>H2-eb1</i>        | 1,74746935 | 0,0004935  |
| Tm2 domain containing 2                                                | <i>Tm2d2</i>         | 1,74671256 | 3,08e-05   |
| Bone morphogenetic protein receptor, type ii (serine/threonine kinase) | <i>Bmpr2</i>         | 1,74665097 | 0,00224421 |
| Atp-binding cassette, sub-family b (mdr/tap), member 7                 | <i>Abcb7</i>         | 1,74598937 | 9,14e-05   |
| Cdna sequence bc002059                                                 | <i>Bc002059</i>      | 1,74430177 | 0,00010696 |
| Imp3, u3 small nucleolar ribonucleoprotein, homolog (yeast)            | <i>Imp3</i>          | 1,74359069 | 2,45e-05   |
| Rna binding motif protein 18                                           | <i>Rbm18</i>         | 1,74356854 | 3,79e-05   |
| Adp-dependent glucokinase                                              | <i>Adpgk</i>         | 1,74298975 | 4,81e-05   |
| Interleukin 18                                                         | <i>Il18</i>          | 1,74287579 | 9,74e-06   |
| Protein tyrosine phosphatase, receptor type, g                         | <i>Ptprg</i>         | 1,74285853 | 4,71e-05   |
| Male enhanced antigen 1                                                | <i>Mea1</i>          | 1,74235919 | 0,0001614  |
| F-box protein 16                                                       | <i>Fbxo16</i>        | 1,74228159 | 0,00076844 |
| Mitochondrial ribosomal protein l24                                    | <i>Mrpl24</i>        | 1,74219089 | 2,77e-05   |
| Chromodomain helicase dna binding protein 1-like                       | <i>Chd1l</i>         | 1,74086251 | 0,00011343 |
| Human immunodeficiency virus type i enhancer binding protein 1         | <i>Hivep1</i>        | 1,74080273 | 0,00010882 |
| Heat shock protein 4                                                   | <i>Hspa4</i>         | 1,73948344 | 0,00145685 |
| Ariadne homolog 2 (drosophila)                                         | <i>Arih2</i>         | 1,73942037 | 7,45e-06   |
| Cdna sequence u90926                                                   | <i>U90926</i>        | 1,73802519 | 0,00696161 |
| Riken cdna 2810474o19 gene                                             | <i>2810474o19rik</i> | 1,73760827 | 0,00040371 |
| Yme1-like 1 (s. Cerevisiae)                                            | <i>Yme1l1</i>        | 1,73641234 | 0,00019225 |
| Src homology 2 domain containing f                                     | <i>Shf</i>           | 1,73638699 | 0,00112402 |
| Tumor necrosis factor receptor superfamily, member 9                   | <i>Tnfrsf9</i>       | 1,73586137 | 2,17e-05   |
| Interferon-related developmental regulator 2                           | <i>Ifrd2</i>         | 1,73472373 | 4,60e-05   |
| Ring finger protein, lim domain interacting                            | <i>Rlim</i>          | 1,73418755 | 2,08e-05   |

|                                                                                                   |                          |            |            |
|---------------------------------------------------------------------------------------------------|--------------------------|------------|------------|
| Transmembrane 7 superfamily member 3                                                              | <i>Tm7sf3</i>            | 1,73408138 | 7,98e-05   |
| Chemokine (c-c motif) ligand 5                                                                    | <i>Ccl5</i>              | 1,73330443 | 0,00033082 |
| Serine (or cysteine) peptidase inhibitor, clade b, member 9b                                      | <i>Serpinb9b</i>         | 1,73236347 | 4,93e-05   |
| Sgt1, suppressor of g2 allele of skp1 (s. Cerevisiae)                                             | <i>Sugt1</i>             | 1,73230952 | 4,67e-06   |
| Tetraspanin 17                                                                                    | <i>Tspan17</i>           | 1,73210529 | 3,09e-05   |
| Swa-70 protein                                                                                    | <i>Swap70</i>            | 1,73084219 | 0,00180087 |
| Ral guanine nucleotide dissociation stimulator-like 3                                             | <i>Rgl3</i>              | 1,73055921 | 0,00034849 |
| Creb binding protein                                                                              | <i>Crebbp</i>            | 1,73013646 | 1,89e-05   |
| Dnaj (hsp40) homolog, subfamily b, member 11                                                      | <i>Dnajb11</i>           | 1,7293318  | 2,97e-05   |
| Exostoses (multiple) 2                                                                            | <i>Ext2</i>              | 1,7292992  | 1,23e-05   |
| Isocitrate dehydrogenase 3 (nad+) beta                                                            | <i>Idh3b</i>             | 1,72889661 | 2,61e-05   |
| Kruppel-like factor 7 (ubiquitous)                                                                | <i>Klf7</i>              | 1,72865898 | 0,0002542  |
| Solute carrier family 31, member 1                                                                | <i>Slc31a1</i>           | 1,72848062 | 2,37e-05   |
| Centrosomal protein 19                                                                            | <i>Cep19</i>             | 1,72759506 | 0,0004203  |
| Splicing factor 3b, subunit 4                                                                     | <i>Sf3b4</i>             | 1,72748986 | 0,00020014 |
| Dynein cytoplasmic 1 light intermediate chain 1                                                   | <i>Dync1li1</i>          | 1,72709217 | 6,86e-06   |
| Low density lipoprotein receptor-related protein 2                                                | <i>Lrp2</i>              | 1,72631858 | 0,0007696  |
| Swi/snf related, matrix associated, actin dependent regulator of chromatin, subfamily e, member 1 | <i>Smrce1</i>            | 1,7260019  | 0,00046059 |
| Phd finger protein 20                                                                             | <i>Phf20</i>             | 1,72551099 | 5,33e-06   |
| Zinc finger protein 26                                                                            | <i>Zfp26</i>             | 1,72493768 | 7,06e-05   |
| Cop9 (constitutive photomorphogenic) homolog, subunit 2 (arabidopsis thaliana)                    | <i>Cops2</i>             | 1,72448817 | 0,00135188 |
| Map kinase-interacting serine/threonine kinase 1                                                  | <i>Mknk1</i>             | 1,72362319 | 0,0001919  |
| Sh3-domain binding protein 1                                                                      | <i>Sh3bp1</i>            | 1,72354339 | 0,00015584 |
| Ww domain containing adaptor with coiled-coil                                                     | <i>Wac</i>               | 1,72336508 | 6,38e-05   |
| Ubiquinol-cytochrome c reductase, complex iii subunit vii                                         | <i>Uqcrcq</i>            | 1,72293924 | 2,57e-05   |
| Kinesin-associated protein 3                                                                      | <i>Kifap3</i>            | 1,72136311 | 0,00010371 |
| Family with sequence similarity 188, member a                                                     | <i>Fam188a</i>           | 1,72067451 | 2,33e-05   |
| Misato homolog 1 (drosophila)                                                                     | <i>Msto1</i>             | 1,7198325  | 6,82e-05   |
| Glucosamine-6-phosphate deaminase 1 pseudogene<br>/// glucosamine-6-phosphate deaminase 1         | <i>Gm8615 /// gnpda1</i> | 1,71936284 | 6,22e-05   |
| Fibronectin type iii domain containing 4                                                          | <i>Fndc4</i>             | 1,71935555 | 0,0017778  |
| Peroxisomal biogenesis factor 11 beta                                                             | <i>Pex11b</i>            | 1,71868515 | 0,000348   |
| Nima (never in mitosis gene a)-related expressed kinase 3                                         | <i>Nek3</i>              | 1,71815112 | 0,0002211  |



|                                                                                |                      |            |            |
|--------------------------------------------------------------------------------|----------------------|------------|------------|
| Yth domain family 1                                                            | <i>Ythdf1</i>        | 1,71746141 | 2,73e-05   |
| Leucine rich repeat containing 58                                              | <i>Lrrc58</i>        | 1,7165575  | 0,00167796 |
| Dna-damage-inducible transcript 4                                              | <i>Ddit4</i>         | 1,71594491 | 0,00012549 |
| Riken cdna 0610009b22 gene                                                     | <i>0610009b22rik</i> | 1,71492486 | 7,94e-05   |
| Seven in absentia 2                                                            | <i>Siah2</i>         | 1,7145363  | 2,14e-05   |
| Riken cdna 1190005i06 gene                                                     | <i>1190005i06rik</i> | 1,71422912 | 9,73e-05   |
| Solute carrier family 7 (cationic amino acid transporter, y+ system), member 5 | <i>Slc7a5</i>        | 1,71412702 | 0,00089199 |
| Cerebral cavernous malformation 2                                              | <i>Ccm2</i>          | 1,71391805 | 7,86e-05   |
| Stam binding protein like 1                                                    | <i>Stambpl1</i>      | 1,71363205 | 3,28e-05   |
| Membrane-spanning 4-domains, subfamily a, member 4b                            | <i>Ms4a4b</i>        | 1,71325662 | 0,00034511 |
| Prp31 pre-mrna processing factor 31 homolog (yeast)                            | <i>Prpf31</i>        | 1,71266338 | 9,60e-05   |
| Testis specific protein kinase 1                                               | <i>Tesk1</i>         | 1,71204496 | 8,00e-05   |
| Herpud family member 2                                                         | <i>Herpud2</i>       | 1,71204479 | 7,69e-05   |
| Clip associating protein 1                                                     | <i>Clasp1</i>        | 1,71156251 | 2,21e-05   |
| Poliovirus receptor-related 1                                                  | <i>Pvrl1</i>         | 1,71116937 | 0,00263603 |
| Integrin alpha v                                                               | <i>Itgav</i>         | 1,71090074 | 1,19e-05   |
| Basic leucine zipper and w2 domains 1                                          | <i>Bzw1</i>          | 1,7100609  | 0,00175769 |
| E26 avian leukemia oncogene 2, 3' domain                                       | <i>Ets2</i>          | 1,70988922 | 2,71e-05   |
| Phosphotriesterase related                                                     | <i>Pter</i>          | 1,70968061 | 0,00034723 |
| Tetratricopeptide repeat, ankyrin repeat and coiled-coil containing 1          | <i>Tanc1</i>         | 1,70948955 | 8,71e-06   |
| Dnaj (hsp40) homolog, subfamily a, member 2                                    | <i>Dnaja2</i>        | 1,70885555 | 2,23e-05   |
| Asparaginyl-trna synthetase                                                    | <i>Nars</i>          | 1,70881097 | 9,66e-06   |
| Ring finger protein 113a1                                                      | <i>Rnf113a1</i>      | 1,70733338 | 3,83e-05   |
| Fc receptor, ige, low affinity ii, alpha polypeptide                           | <i>Fcer2a</i>        | 1,70728343 | 0,00106069 |
| F-box and leucine-rich repeat protein 8                                        | <i>Fbxl8</i>         | 1,7072213  | 0,00120496 |
| Rho guanine nucleotide exchange factor (gef) 25                                | <i>Arhgef25</i>      | 1,70667041 | 0,00029909 |
| Lysosomal-associated membrane protein 2                                        | <i>Lamp2</i>         | 1,70656643 | 6,50e-06   |
| Serum response factor binding protein 1                                        | <i>Srfbp1</i>        | 1,7062255  | 0,00013227 |
| Nme/nm23 family member 5                                                       | <i>Nme5</i>          | 1,70589096 | 0,00526766 |
| Suppressor of ty 20                                                            | <i>Supt20</i>        | 1,70533274 | 0,00072923 |
| Myb/sant-like dna-binding domain containing 3                                  | <i>Msantd3</i>       | 1,70455235 | 0,00037947 |
| Poly(rc) binding protein 3                                                     | <i>Pcbp3</i>         | 1,70448794 | 0,00087678 |
| Potassium voltage-gated channel, subfamily q, member 5                         | <i>Kcnq5</i>         | 1,70428287 | 0,00040488 |
| Zinc finger protein 68                                                         | <i>Zfp68</i>         | 1,70422451 | 0,00021139 |

|                                                                                                                                                                                                                                                                                                                                                          |                                                                                                                                                                           |            |            |
|----------------------------------------------------------------------------------------------------------------------------------------------------------------------------------------------------------------------------------------------------------------------------------------------------------------------------------------------------------|---------------------------------------------------------------------------------------------------------------------------------------------------------------------------|------------|------------|
| Casein kinase 1, gamma 1                                                                                                                                                                                                                                                                                                                                 | <i>Csnk1g1</i>                                                                                                                                                            | 1,70413785 | 9,66e-05   |
| Leucine rich repeat containing 42                                                                                                                                                                                                                                                                                                                        | <i>Lrrc42</i>                                                                                                                                                             | 1,70282261 | 0,00039132 |
| Tubulointerstitial nephritis antigen-like 1                                                                                                                                                                                                                                                                                                              | <i>Tinagl1</i>                                                                                                                                                            | 1,7027364  | 0,0033596  |
| Laminin, gamma 1                                                                                                                                                                                                                                                                                                                                         | <i>Lamc1</i>                                                                                                                                                              | 1,70265319 | 0,00116435 |
| Esf1, nucleolar pre-rRNA processing protein, homolog (s. Cerevisiae)                                                                                                                                                                                                                                                                                     | <i>Esf1</i>                                                                                                                                                               | 1,70247735 | 4,14e-05   |
| Asparagine-linked glycosylation 1 (beta-1,4-mannosyltransferase)                                                                                                                                                                                                                                                                                         | <i>Alg1</i>                                                                                                                                                               | 1,70152431 | 0,00022947 |
| Zinc finger protein 777                                                                                                                                                                                                                                                                                                                                  | <i>Zfp777</i>                                                                                                                                                             | 1,70140251 | 4,22e-05   |
| Histone cluster 1, h4a /// histone cluster 1, h4b /// histone cluster 1, h4c /// histone cluster 1, h4d /// histone cluster 1, h4f /// histone cluster 1, h4h /// histone cluster 1, h4i /// histone cluster 1, h4j /// histone cluster 1, h4k /// histone cluster 1, h4m /// histone cluster 1, h4n /// histone cluster 2, h4 /// histone cluster 4, h4 | <i>Hist1h4a /// hist1h4b /// hist1h4c /// hist1h4d /// hist1h4f /// hist1h4h /// hist1h4i /// hist1h4j /// hist1h4k /// hist1h4m /// hist1h4n /// hist2h4 /// hist4h4</i> | 1,7013617  | 0,00017967 |
| Sorting nexin 16                                                                                                                                                                                                                                                                                                                                         | <i>Snx16</i>                                                                                                                                                              | 1,70041033 | 4,62e-05   |
| Traf family member-associated NF-kappa B activator                                                                                                                                                                                                                                                                                                       | <i>Tank</i>                                                                                                                                                               | 1,69848508 | 0,00827998 |
| Short chain dehydrogenase/reductase family 42e, member 1                                                                                                                                                                                                                                                                                                 | <i>Sdr42e1</i>                                                                                                                                                            | 1,69818663 | 0,00045725 |
| Neutrophil cytosolic factor 4                                                                                                                                                                                                                                                                                                                            | <i>Ncf4</i>                                                                                                                                                               | 1,69812586 | 0,00064446 |
| Retinol dehydrogenase 9                                                                                                                                                                                                                                                                                                                                  | <i>Rdh9</i>                                                                                                                                                               | 1,69785976 | 5,03e-05   |
| Enoyl-coenzyme A hydratase/3-hydroxyacyl coenzyme A dehydrogenase                                                                                                                                                                                                                                                                                        | <i>Ehhadh</i>                                                                                                                                                             | 1,69781774 | 0,00028296 |
| Centrosomal protein 68                                                                                                                                                                                                                                                                                                                                   | <i>Cep68</i>                                                                                                                                                              | 1,69780775 | 1,54e-05   |
| Transmembrane protein with metallophosphoesterase domain                                                                                                                                                                                                                                                                                                 | <i>Tmppe</i>                                                                                                                                                              | 1,69773327 | 0,00165421 |
| Transducin-like enhancer of split 1, homolog of drosophila E(spl)                                                                                                                                                                                                                                                                                        | <i>Tle1</i>                                                                                                                                                               | 1,69762907 | 2,62e-05   |
| Zinc finger protein 82                                                                                                                                                                                                                                                                                                                                   | <i>Zfp82</i>                                                                                                                                                              | 1,69689278 | 0,00024444 |
| Forkhead box O3                                                                                                                                                                                                                                                                                                                                          | <i>Foxo3</i>                                                                                                                                                              | 1,69685754 | 2,12e-05   |
| Deaf (Asp-Glu-Ala-His) box polypeptide 32                                                                                                                                                                                                                                                                                                                | <i>Dhx32</i>                                                                                                                                                              | 1,69622242 | 2,09e-05   |
| Monoglyceride lipase                                                                                                                                                                                                                                                                                                                                     | <i>Mgll</i>                                                                                                                                                               | 1,69567867 | 0,00037891 |
| Crystallin, lambda 1                                                                                                                                                                                                                                                                                                                                     | <i>Cryl1</i>                                                                                                                                                              | 1,69509024 | 4,64e-05   |
| Inositol 1,4,5-trisphosphate receptor 2                                                                                                                                                                                                                                                                                                                  | <i>Itpr2</i>                                                                                                                                                              | 1,69439739 | 0,00054641 |
| Myoneurin                                                                                                                                                                                                                                                                                                                                                | <i>Mynn</i>                                                                                                                                                               | 1,69420899 | 0,00489794 |
| Glycogen synthase 1, muscle                                                                                                                                                                                                                                                                                                                              | <i>Gys1</i>                                                                                                                                                               | 1,69419032 | 0,00423417 |

|                                                                                                             |                      |            |            |
|-------------------------------------------------------------------------------------------------------------|----------------------|------------|------------|
| Hyaluronic acid binding protein 4                                                                           | <i>Habp4</i>         | 1,69416908 | 9,07e-05   |
| Atp-binding cassette, sub-family a (abc1), member 2                                                         | <i>Abca2</i>         | 1,69360597 | 0,00088922 |
| Tropomyosin 1, alpha                                                                                        | <i>Tpm1</i>          | 1,6929794  | 0,00218845 |
| Transforming growth factor, beta receptor i                                                                 | <i>Tgfb1</i>         | 1,69253346 | 0,00053227 |
| Rhopilin, rho gtpase binding protein 2                                                                      | <i>Rhpn2</i>         | 1,69219317 | 0,00126234 |
| Tetratricopeptide repeat domain 7b                                                                          | <i>Ttc7b</i>         | 1,69200743 | 0,00345784 |
| Leucine rich repeat (in flii) interacting protein 1                                                         | <i>Lrrfip1</i>       | 1,69197251 | 0,00085105 |
| R3h domain and coiled-coil containing 1                                                                     | <i>R3hcc1</i>        | 1,6917971  | 0,0001015  |
| Nedd4 family interacting protein 1                                                                          | <i>Ndfip1</i>        | 1,69156121 | 1,21e-05   |
| Riken cdna 2510039o18 gene                                                                                  | <i>2510039o18rik</i> | 1,69146332 | 9,18e-05   |
| Mckusick-kaufman syndrome                                                                                   | <i>Mkks</i>          | 1,69130934 | 0,00085799 |
| Deah (asp-glu-ala-his) box polypeptide 40                                                                   | <i>Dhx40</i>         | 1,69114088 | 1,00e-05   |
| Ring finger protein 135                                                                                     | <i>Rnf135</i>        | 1,69113496 | 0,00183379 |
| Enhancer of yellow 2 homolog (drosophila)                                                                   | <i>Eny2</i>          | 1,690676   | 0,00014138 |
| Pyruvate dehydrogenase (lipoamide) beta                                                                     | <i>Pdhb</i>          | 1,68996332 | 0,00545462 |
| Eukaryotic translation initiation factor 2, subunit 2 (beta)                                                | <i>Eif2s2</i>        | 1,68849256 | 9,28e-06   |
| Minichromosome maintenance deficient 3 (s. Cerevisiae) associated protein                                   | <i>Mcm3ap</i>        | 1,68825168 | 0,0001005  |
| Phosphatidylinositol transfer protein, membrane-associated 1                                                | <i>Pitpnm1</i>       | 1,68758188 | 6,58e-05   |
| Transmembrane protein 45a                                                                                   | <i>Tmem45a</i>       | 1,68592715 | 0,00032962 |
| Cullin 3                                                                                                    | <i>Cul3</i>          | 1,68515387 | 0,00016264 |
| Atpase, ca++-sequestering                                                                                   | <i>Atp2c1</i>        | 1,68515336 | 0,00792987 |
| N-ethylmaleimide sensitive fusion protein attachment protein beta                                           | <i>Napb</i>          | 1,68508292 | 0,00789226 |
| Fibroblast growth factor (acidic) intracellular binding protein                                             | <i>Fibp</i>          | 1,68470035 | 5,91e-05   |
| Dolichyl-phosphate (udp-n-acetylglucosamine) acetylglucosaminophosphotransferase 1 (glcnac-1-p transferase) | <i>Dpagt1</i>        | 1,68454369 | 1,45e-05   |
| Nadh dehydrogenase (ubiquinone) fe-s protein 2                                                              | <i>Ndufs2</i>        | 1,68431027 | 2,65e-05   |
| Spermatogenesis associated 5                                                                                | <i>Spata5</i>        | 1,6832105  | 2,25e-05   |
| Insulin induced gene 2                                                                                      | <i>Insig2</i>        | 1,68228942 | 9,12e-05   |
| Rna binding motif protein 39                                                                                | <i>Rbm39</i>         | 1,68154491 | 0,00014434 |
| Integrin alpha fg-gap repeat containing 1                                                                   | <i>Itfg1</i>         | 1,68124273 | 0,00344739 |
| Protein tyrosine phosphatase, receptor type, o                                                              | <i>Ptpro</i>         | 1,68083494 | 8,25e-05   |
| Alcohol dehydrogenase 7 (class iv), mu or sigma                                                             | <i>Adh7</i>          | 1,68052465 | 0,00418478 |

|                                                                       |                         |            |            |
|-----------------------------------------------------------------------|-------------------------|------------|------------|
| polypeptide                                                           |                         |            |            |
| Transglutaminase 2, c polypeptide                                     | <i>Tgm2</i>             | 1,68049094 | 5,94e-05   |
| Zinc finger protein 191                                               | <i>Zfp191</i>           | 1,68008871 | 0,00223007 |
| Ras p21 protein activator 2                                           | <i>Rasa2</i>            | 1,67983535 | 0,00191318 |
| Growth factor independent 1                                           | <i>Gfi1</i>             | 1,67939746 | 9,61e-05   |
| Carboxypeptidase q                                                    | <i>Cpq</i>              | 1,67891193 | 1,38e-05   |
| Zinc finger protein 65 /// zinc finger protein 738                    | <i>Zfp65 /// zfp738</i> | 1,67879186 | 0,00046119 |
| Transducin-like enhancer of split 3, homolog of drosophila e(spl)     | <i>Tle3</i>             | 1,67869063 | 0,00650527 |
| Oviductal glycoprotein 1                                              | <i>Ovgp1</i>            | 1,67755857 | 0,00126305 |
| Zinc finger with krab and scan domains 1                              | <i>Zkscan1</i>          | 1,67753933 | 4,43e-05   |
| Pleckstrin homology domain containing, family b (evectins) member 2   | <i>Plekhb2</i>          | 1,67726657 | 0,00038275 |
| Zinc finger protein 106                                               | <i>Zfp106</i>           | 1,67704166 | 2,12e-05   |
| Harvey rat sarcoma oncogene, subgroup r                               | <i>Rras</i>             | 1,67690405 | 6,71e-05   |
| Histocompatibility 2, class ii, locus dma                             | <i>H2-dma</i>           | 1,67631424 | 0,00059713 |
| Succinate dehydrogenase complex, subunit c, integral membrane protein | <i>Sdhc</i>             | 1,67598716 | 0,006106   |
| Mitochondrial ribosomal protein l1                                    | <i>Mrpl1</i>            | 1,67570982 | 5,86e-06   |
| St3 beta-galactoside alpha-2,3-sialyltransferase 5                    | <i>St3gal5</i>          | 1,67492313 | 0,00026657 |
| Sequestosome 1                                                        | <i>Sqstm1</i>           | 1,67473504 | 6,78e-06   |
| Kelch-like 22                                                         | <i>Klhl22</i>           | 1,67466915 | 5,48e-05   |
| Zinc finger protein of the cerebellum 4                               | <i>Zic4</i>             | 1,67383533 | 0,00017598 |
| Lin-7 homolog c (c. Elegans)                                          | <i>Lin7c</i>            | 1,67381135 | 0,00463563 |
| Sumo/sentrin specific peptidase 6                                     | <i>Senp6</i>            | 1,67352806 | 0,00074601 |
| Udp-glnac:betagal beta-1,3-n-acetylglucosaminyltransferase 1          | <i>B3gnt1</i>           | 1,67329609 | 0,00026135 |
| Growth arrest specific 2                                              | <i>Gas2</i>             | 1,67329211 | 0,0024417  |
| Jumping translocation breakpoint                                      | <i>Jtb</i>              | 1,67299518 | 1,35e-05   |
| A kinase (prka) anchor protein 17b                                    | <i>Akap17b</i>          | 1,67295961 | 0,00023079 |
| Suppressor of variegation 4-20 homolog 1 (drosophila)                 | <i>Suv420h1</i>         | 1,6729011  | 0,00014358 |
| Proteasome (prosome, macropain) assembly chaperone 4                  | <i>Psmg4</i>            | 1,67260858 | 9,95e-05   |
| Protocadherin 10                                                      | <i>Pcdh10</i>           | 1,67182839 | 0,00766757 |
| Riken cdna 1700021f05 gene                                            | <i>1700021f05rik</i>    | 1,67101487 | 3,36e-05   |
| Phd finger protein 21a                                                | <i>Phf21a</i>           | 1,67088778 | 0,00034049 |
| Corepressor interacting with rbpj, 1                                  | <i>Cir1</i>             | 1,67066321 | 0,00044372 |

|                                                                                                 |                 |            |            |
|-------------------------------------------------------------------------------------------------|-----------------|------------|------------|
| Interleukin 33                                                                                  | <i>Il33</i>     | 1,67057624 | 1,61e-05   |
| G-protein signalling modulator 1 (ags3-like, c. Elegans)                                        | <i>Gpsm1</i>    | 1,67019335 | 0,00088559 |
| U7 snrnp-specific sm-like protein lsm10                                                         | <i>Lsm10</i>    | 1,66988478 | 2,65e-05   |
| Hemk methyltransferase family member 1                                                          | <i>Hemk1</i>    | 1,6690779  | 9,91e-05   |
| Mannoside acetylglucosaminyltransferase 4, isoenzyme b                                          | <i>Mgat4b</i>   | 1,66848064 | 0,00014623 |
| Autism susceptibility candidate 2                                                               | <i>Auts2</i>    | 1,66788415 | 0,0030599  |
| Cartilage associated protein                                                                    | <i>Crtap</i>    | 1,66775162 | 1,99e-05   |
| U2 small nuclear ribonucleoprotein b                                                            | <i>Snrpb2</i>   | 1,66715056 | 0,00158215 |
| Small edrk-rich factor 1                                                                        | <i>Serf1</i>    | 1,66703768 | 0,00011033 |
| Vacuolar protein sorting 4b (yeast)                                                             | <i>Vps4b</i>    | 1,6661104  | 0,00019843 |
| Lectin, mannose-binding 2                                                                       | <i>Lman2</i>    | 1,66578228 | 0,00020694 |
| Glutaredoxin 2 (thioltransferase)                                                               | <i>Glr2</i>     | 1,66504897 | 3,32e-05   |
| Fukutin                                                                                         | <i>Fktn</i>     | 1,6647452  | 0,00079949 |
| Glutamyl-prolyl-tRNA synthetase                                                                 | <i>Eprs</i>     | 1,66459355 | 3,98e-05   |
| RNA binding motif protein 15                                                                    | <i>Rbm15</i>    | 1,66448265 | 0,00078092 |
| Mannosidase 2, alpha b1                                                                         | <i>Man2b1</i>   | 1,66379814 | 2,53e-05   |
| Poly (adp-ribose) polymerase family, member 3                                                   | <i>Parp3</i>    | 1,66338798 | 9,03e-05   |
| Myeloid/lymphoid or mixed-lineage leukemia (trithorax homolog, drosophila); translocated to, 11 | <i>Mllt11</i>   | 1,66299565 | 0,00010472 |
| Olfactomedin 1                                                                                  | <i>Olfm1</i>    | 1,662806   | 0,00061003 |
| Cdna sequence bc003331                                                                          | <i>Bc003331</i> | 1,66262287 | 0,00014205 |
| Neuropilin 1                                                                                    | <i>Nrp1</i>     | 1,66257163 | 0,00022227 |
| Retinitis pigmentosa GTPase regulator                                                           | <i>RpgR</i>     | 1,66241696 | 0,00100536 |
| Pescadillo homolog 1, containing BRCT domain (zebrafish)                                        | <i>Pes1</i>     | 1,66202114 | 0,00024726 |
| Serum amyloid A 1                                                                               | <i>Saa1</i>     | 1,66200977 | 0,00021895 |
| Propionyl-coenzyme A carboxylase, alpha polypeptide                                             | <i>Pcca</i>     | 1,66121759 | 5,98e-05   |
| Ras suppressor protein 1                                                                        | <i>Rsu1</i>     | 1,66121348 | 5,15e-05   |
| Nuclear receptor co-repressor 1                                                                 | <i>Ncor1</i>    | 1,660688   | 6,08e-05   |
| Thioredoxin interacting protein                                                                 | <i>Txnip</i>    | 1,6603891  | 6,25e-05   |
| Dimethylarginine dimethylaminohydrolase 2                                                       | <i>Ddah2</i>    | 1,65984188 | 9,41e-05   |
| Small proline-rich protein 2h                                                                   | <i>Spr2h</i>    | 1,65972739 | 0,00019227 |
| Expressed sequence ai413582                                                                     | <i>Ai413582</i> | 1,65895067 | 0,00165405 |
| Thymocyte nuclear protein 1                                                                     | <i>Thyn1</i>    | 1,6586819  | 1,54e-05   |
| Programmed cell death 4                                                                         | <i>Pdcd4</i>    | 1,65857423 | 2,87e-05   |

|                                                                                       |                      |            |            |
|---------------------------------------------------------------------------------------|----------------------|------------|------------|
| Platelet derived growth factor, alpha                                                 | <i>Pdgfa</i>         | 1,65780994 | 1,97e-05   |
| Haus augmin-like complex, subunit 2                                                   | <i>Haus2</i>         | 1,65779878 | 0,00044208 |
| Transmembrane protein 203                                                             | <i>Tmem203</i>       | 1,65757683 | 0,00012417 |
| Nuclear factor of kappa light polypeptide gene enhancer in b cells inhibitor, epsilon | <i>Nfkbie</i>        | 1,6571846  | 0,0008499  |
| Gtp binding protein 2                                                                 | <i>Gtpbp2</i>        | 1,65716441 | 0,00063618 |
| Camp-regulated phosphoprotein 19                                                      | <i>Arpp19</i>        | 1,65708592 | 6,10e-05   |
| Low-density lipoprotein receptor-related protein 10                                   | <i>Lrp10</i>         | 1,65703737 | 0,00044944 |
| Enoyl-coenzyme a delta isomerase 2                                                    | <i>Eci2</i>          | 1,65696705 | 3,00e-05   |
| Killer cell lectin-like receptor subfamily g, member 1                                | <i>Klrg1</i>         | 1,65639945 | 0,0005005  |
| Zinc finger protein 426                                                               | <i>Zfp426</i>        | 1,65605991 | 6,44e-05   |
| Kti12 homolog, chromatin associated (s. Cerevisiae)                                   | <i>Kti12</i>         | 1,65602875 | 0,00018153 |
| Family with sequence similarity 173, member a                                         | <i>Fam173a</i>       | 1,65601345 | 2,72e-05   |
| Inhibitor of growth family, member 1                                                  | <i>Ing1</i>          | 1,65598297 | 1,46e-05   |
| Alcohol dehydrogenase 5 (class iii), chi polypeptide                                  | <i>Adh5</i>          | 1,65533409 | 4,09e-05   |
| Zinc finger ccch type containing 12a                                                  | <i>Zc3h12a</i>       | 1,65514955 | 0,00387369 |
| Mitogen-activated protein kinase 6                                                    | <i>Mapk6</i>         | 1,65473598 | 0,00275052 |
| Riken cDNA 4930453n24 gene                                                            | <i>4930453n24rik</i> | 1,65392046 | 2,46e-05   |
| Signal peptidase complex subunit 1 homolog (s. Cerevisiae)                            | <i>Spcs1</i>         | 1,65348557 | 0,00014471 |
| B cell translocation gene 2, anti-proliferative                                       | <i>Btg2</i>          | 1,65259581 | 0,00052108 |
| Signal recognition particle receptor, b subunit                                       | <i>Srprb</i>         | 1,65228533 | 0,00836148 |
| Prokineticin receptor 1                                                               | <i>Prokr1</i>        | 1,65221878 | 0,00019762 |
| Lysine-rich coiled-coil 1                                                             | <i>Krcc1</i>         | 1,64944902 | 0,00783068 |
| Nadh dehydrogenase (ubiquinone) fe-s protein 1                                        | <i>Ndufs1</i>        | 1,64923917 | 0,00022429 |
| Coiled-coil domain containing 86                                                      | <i>Ccdc86</i>        | 1,64821902 | 0,00039479 |
| Ufm1-specific peptidase 1                                                             | <i>Ufsp1</i>         | 1,64817757 | 0,00021987 |
| Pet112 homolog (s. Cerevisiae)                                                        | <i>Pet112</i>        | 1,64775139 | 0,00070305 |
| Er degradation enhancer, mannosidase alpha-like 3                                     | <i>Edem3</i>         | 1,6470641  | 8,54e-05   |
| Breast cancer anti-estrogen resistance 3                                              | <i>Bcar3</i>         | 1,646697   | 6,06e-05   |
| Set domain containing 6                                                               | <i>Setd6</i>         | 1,64661711 | 0,00024488 |
| Cyclin-dependent kinase 7                                                             | <i>Cdk7</i>          | 1,64614588 | 0,0002902  |
| Membrane-associated ring finger (c3hc4) 7                                             | <i>lil.07</i>        | 1,64564955 | 0,00027514 |
| Zinc finger protein 955a                                                              | <i>Zfp955a</i>       | 1,64562851 | 0,00018976 |
| Transmembrane protein 245                                                             | <i>Tmem245</i>       | 1,64562774 | 5,25e-05   |
| Run and sh3 domain containing 2                                                       | <i>Rusc2</i>         | 1,64522886 | 0,00016083 |
| Heat shock protein 1 (chaperonin 10)                                                  | <i>Hspe1</i>         | 1,64506706 | 8,03e-05   |
| Cullin 9                                                                              | <i>Cul9</i>          | 1,64454443 | 0,00039902 |

|                                                                              |                              |            |            |
|------------------------------------------------------------------------------|------------------------------|------------|------------|
| Family with sequence similarity 134, member a                                | <i>Fam134a</i>               | 1,64450244 | 2,68e-05   |
| Ras homolog gene family, member g                                            | <i>Rhog</i>                  | 1,64439299 | 0,00033229 |
| Tripartite motif-containing 32                                               | <i>Trim32</i>                | 1,64395766 | 0,00071844 |
| Pyrophosphatase (inorganic) 2                                                | <i>Ppa2</i>                  | 1,64350081 | 5,06e-05   |
| Hairy and enhancer of split 6                                                | <i>Hes6</i>                  | 1,64196116 | 0,00059526 |
| Spry domain containing 4                                                     | <i>Spryd4</i>                | 1,64175267 | 0,00010627 |
| Vacuolar protein sorting 18 (yeast)                                          | <i>Vps18</i>                 | 1,64105318 | 6,82e-05   |
| Cdna sequence bc048403                                                       | <i>Bc048403</i>              | 1,64064091 | 0,00022333 |
| Glypican 4                                                                   | <i>Gpc4</i>                  | 1,64043142 | 3,38e-05   |
| Kinesin family member 3b                                                     | <i>Kif3b</i>                 | 1,64001818 | 0,00019963 |
| Signal recognition particle 14                                               | <i>Srp14</i>                 | 1,63969852 | 2,69e-05   |
| Protein sfi1 homolog /// sfi1 homolog, spindle assembly associated (yeast)   | <i>Loc100861749 /// sfi1</i> | 1,63919943 | 0,0001145  |
| Ubiquitin-conjugating enzyme e2d 2a                                          | <i>Ube2d2a</i>               | 1,63868999 | 1,14e-05   |
| N-myristoyltransferase 1                                                     | <i>Nmt1</i>                  | 1,63813482 | 3,25e-05   |
| Dcn1, defective in cullin neddylation 1, domain containing 1 (s. Cerevisiae) | <i>Dcun1d1</i>               | 1,63781016 | 0,00075176 |
| Transmembrane protein 205                                                    | <i>Tmem205</i>               | 1,63735356 | 8,74e-05   |
| Ribosomal protein s24                                                        | <i>Rps24</i>                 | 1,63663996 | 0,00337027 |
| Trafficking protein particle complex 6a                                      | <i>Trappc6a</i>              | 1,63646037 | 3,20e-05   |
| Cysteine-rich transmembrane module containing 1                              | <i>Cystm1</i>                | 1,63629896 | 0,00034511 |
| Neuropeptide y receptor y1                                                   | <i>Npy1r</i>                 | 1,6360367  | 0,00011165 |
| Uri1, prefoldin-like chaperone                                               | <i>Uri1</i>                  | 1,6352951  | 0,00018976 |
| Transmembrane protein 209                                                    | <i>Tmem209</i>               | 1,63386937 | 0,00265477 |
| Active bcr-related gene                                                      | <i>Abr</i>                   | 1,63341946 | 4,20e-05   |
| Zinc finger protein 455                                                      | <i>Zfp455</i>                | 1,63330676 | 0,0043561  |
| Btb (poz) domain containing 1                                                | <i>Btbd1</i>                 | 1,63315371 | 2,68e-05   |
| Phosphatidic acid phosphatase type 2c                                        | <i>Ppap2c</i>                | 1,63305384 | 1,67e-05   |
| Renin binding protein                                                        | <i>Renbp</i>                 | 1,6329074  | 4,37e-05   |
| Ankyrin repeat and zinc finger domain containing 1                           | <i>Ankzf1</i>                | 1,63257105 | 2,81e-05   |
| Tripartite motif-containing 21                                               | <i>Trim21</i>                | 1,63156686 | 0,0001004  |
| Plakophilin 3                                                                | <i>Pkp3</i>                  | 1,63074463 | 0,00048876 |
| Glioblastoma amplified sequence                                              | <i>Gbas</i>                  | 1,63069086 | 0,00087915 |
| Acid phosphatase 6, lysophosphatidic                                         | <i>Acp6</i>                  | 1,63041618 | 5,53e-05   |
| Tnf receptor-associated factor 5                                             | <i>Traf5</i>                 | 1,63004899 | 3,97e-05   |
| Cyclin c                                                                     | <i>Ccnc</i>                  | 1,6299198  | 0,00940912 |
| Tribbles homolog 2 (drosophila)                                              | <i>Trib2</i>                 | 1,62935617 | 0,00023761 |
| Cold shock domain containing e1, rna binding                                 | <i>Csde1</i>                 | 1,62922842 | 5,45e-05   |

|                                                                                          |                                     |            |            |
|------------------------------------------------------------------------------------------|-------------------------------------|------------|------------|
| Aprataxin                                                                                | <i>Aptx</i>                         | 1,62906858 | 0,00023738 |
| Lactamase, beta                                                                          | <i>Lactb</i>                        | 1,62843702 | 0,0006036  |
| Phosphatidylserine decarboxylase ///                                                     | <i>Pisd ///</i> <i>pisd-ps1 ///</i> | 1,62834179 | 2,90e-05   |
| phosphatidylserine decarboxylase, pseudogene 1 ///                                       | <i>pisd-ps3</i>                     |            |            |
| phosphatidylserine decarboxylase, pseudogene 3                                           |                                     |            |            |
| Alpha-n-acetylglucosaminidase (sanfilippo disease<br>iiib)                               | <i>Naglu</i>                        | 1,6282772  | 0,00031434 |
| Solute carrier family 26, member 6                                                       | <i>Slc26a6</i>                      | 1,62800821 | 0,00095432 |
| Transducer of erbb-2.1                                                                   | <i>Tob1</i>                         | 1,62732519 | 0,0091882  |
| Protein phosphatase 2, regulatory subunit b, alpha                                       | <i>Ppp2r2a</i>                      | 1,62692791 | 4,38e-05   |
| Adp-ribose/cdp-alcohol diphosphatase, manganese<br>dependent                             | <i>Adprm</i>                        | 1,62688332 | 0,00080273 |
| Wd repeat domain 26                                                                      | <i>Wdr26</i>                        | 1,62685157 | 0,00218502 |
| Cystinosis, nephropathic                                                                 | <i>Ctns</i>                         | 1,62682997 | 0,00038699 |
| Orai calcium release-activated calcium modulator 1                                       | <i>Orai1</i>                        | 1,62613911 | 0,00415459 |
| Selenophosphate synthetase 1                                                             | <i>Sephs1</i>                       | 1,62546048 | 0,00185763 |
| Dihydrolipoamide s-acetyltransferase (e2 component<br>of pyruvate dehydrogenase complex) | <i>Dlat</i>                         | 1,62492897 | 0,00110392 |
| 1-acylglycerol-3-phosphate o-acyltransferase 3                                           | <i>Agpat3</i>                       | 1,62489811 | 9,82e-05   |
| Poliovirus receptor-related 3                                                            | <i>Pvr13</i>                        | 1,62445915 | 0,00299908 |
| Sperm specific antigen 2                                                                 | <i>Ssfa2</i>                        | 1,62424531 | 0,0001612  |
| Isoleucine-trna synthetase 2, mitochondrial                                              | <i>Iars2</i>                        | 1,62400669 | 0,00016586 |
| Mitochondrial fission process 1                                                          | <i>Mtfp1</i>                        | 1,62393252 | 3,75e-05   |
| Epithelial membrane protein 2                                                            | <i>Emp2</i>                         | 1,62309622 | 0,00208966 |
| Mitochondrial methionyl-trna formyltransferase                                           | <i>Mtfmt</i>                        | 1,62257456 | 0,00055208 |
| Ecto-nox disulfide-thiol exchanger 2                                                     | <i>Enox2</i>                        | 1,62255862 | 0,0019343  |
| Acyl-coenzyme a binding domain containing 6                                              | <i>Acbd6</i>                        | 1,62105058 | 0,00023039 |
| Superoxide dismutase 1, soluble                                                          | <i>Sod1</i>                         | 1,62086893 | 0,00026641 |
| Nlr family member x1                                                                     | <i>Nlr1</i>                         | 1,62051515 | 0,00088747 |
| Ngfi-a binding protein 1                                                                 | <i>Nab1</i>                         | 1,61886014 | 0,00660289 |
| Monoamine oxidase a                                                                      | <i>Maoa</i>                         | 1,61884022 | 2,38e-05   |
| Single immunoglobulin and toll-interleukin 1<br>receptor (tir) domain                    | <i>Sigirr</i>                       | 1,61825184 | 8,09e-05   |
| Protein tyrosine phosphatase, non-receptor type 4                                        | <i>Ptpn4</i>                        | 1,618215   | 0,00083623 |
| Phosphoribosylglycinamide formyltransferase                                              | <i>Gart</i>                         | 1,61795968 | 3,53e-05   |
| Uhrf1 (icbp90) binding protein 1                                                         | <i>Uhrf1bp1</i>                     | 1,61730256 | 0,00011258 |
| Notch 3                                                                                  | <i>Notch3</i>                       | 1,61715522 | 0,00210465 |
| Eukaryotic translation initiation factor 4e binding                                      | <i>Eif4ebp1</i>                     | 1,61711913 | 8,95e-05   |



|                                                                                                  |                           |            |            |
|--------------------------------------------------------------------------------------------------|---------------------------|------------|------------|
| protein 1                                                                                        |                           |            |            |
| Zinc finger protein 207                                                                          | <i>Zfp207</i>             | 1,61703591 | 0,00602624 |
| Tyrosyl-trna synthetase                                                                          | <i>Yars</i>               | 1,6168948  | 2,71e-05   |
| Wilms tumour 1-associating protein                                                               | <i>Wtap</i>               | 1,61623773 | 6,02e-05   |
| Solute carrier family 33 (acetyl-coa transporter), member 1                                      | <i>Slc33a1</i>            | 1,61601052 | 0,00223585 |
| Leucine-rich ppr-motif containing                                                                | <i>Lrprrc</i>             | 1,61556128 | 0,00023654 |
| Serine/threonine/tyrosine interaction protein                                                    | <i>Styx</i>               | 1,61493198 | 0,00131005 |
| Smad family member 4                                                                             | <i>Smad4</i>              | 1,61453659 | 9,39e-05   |
| Hiv tat specific factor 1                                                                        | <i>Htatsf1</i>            | 1,61397481 | 8,09e-05   |
| Ergic and golgi 3                                                                                | <i>Ergic3</i>             | 1,61371141 | 0,00015262 |
| Riken cdna 3110043o21 gene                                                                       | <i>3110043o21rik</i>      | 1,61318721 | 0,00029425 |
| Transmembrane protein 218                                                                        | <i>Tmem218</i>            | 1,61286579 | 0,0009961  |
| Zinc finger protein 959                                                                          | <i>Zfp959</i>             | 1,6124552  | 0,00094959 |
| Death effector domain-containing                                                                 | <i>Dedd</i>               | 1,61199771 | 0,00033924 |
| S100p binding protein                                                                            | <i>S100pbp</i>            | 1,61140527 | 0,00135376 |
| Butyrophilin, subfamily 1, member a1                                                             | <i>Btn1a1</i>             | 1,61060434 | 0,00173407 |
| Zinc finger protein 445                                                                          | <i>Zfp445</i>             | 1,61041997 | 0,00054515 |
| Ribosomal protein s20                                                                            | <i>Rps20</i>              | 1,61032801 | 0,00064732 |
| Hydroxysteroid dehydrogenase like 2                                                              | <i>Hsd12</i>              | 1,60989575 | 0,00084484 |
| Breast cancer anti-estrogen resistance 1                                                         | <i>Bcar1</i>              | 1,60941743 | 0,00015524 |
| Activity regulated cytoskeletal-associated protein                                               | <i>Arc</i>                | 1,60913752 | 0,00167217 |
| Forkhead box c2                                                                                  | <i>Foxc2</i>              | 1,60878408 | 0,00144955 |
| Plexin a3                                                                                        | <i>Plxna3</i>             | 1,60844577 | 3,52e-05   |
| Calmodulin regulated spectrin-associated protein 1                                               | <i>Camsap1</i>            | 1,60800496 | 7,59e-05   |
| Trub pseudouridine (psi) synthase homolog 2 (e. Coli)                                            | <i>Trub2</i>              | 1,60760357 | 0,00012661 |
| Riken cdna 1110054m08 gene                                                                       | <i>1110054m08rik</i>      | 1,60724927 | 0,00775427 |
| Bcl2-associated athanogene 5                                                                     | <i>Bag5</i>               | 1,60692305 | 8,32e-05   |
| Wntless homolog (drosophila)                                                                     | <i>Wls</i>                | 1,6066287  | 3,84e-05   |
| Las1-like (s. Cerevisiae)                                                                        | <i>Las1l</i>              | 1,6057998  | 5,36e-05   |
| Transformation related protein 53 binding protein 1                                              | <i>Trp53bp1</i>           | 1,60552099 | 0,00010805 |
| Cd151 antigen                                                                                    | <i>Cd151</i>              | 1,60517455 | 4,80e-05   |
| Prickle homolog 4 (drosophila) /// translocase of outer mitochondrial membrane 6 homolog (yeast) | <i>Prickle4 /// tomm6</i> | 1,60493042 | 0,00906764 |
| Regulator of g-protein signaling 19                                                              | <i>Rgs19</i>              | 1,60379967 | 0,00055891 |
| Protein tyrosine phosphatase-like (proline instead of catalytic arginine), member b              | <i>Ptplb</i>              | 1,60334459 | 0,00020832 |

|                                                                          |                      |            |            |
|--------------------------------------------------------------------------|----------------------|------------|------------|
| Asteroid homolog 1 (drosophila)                                          | <i>Aste1</i>         | 1,60258297 | 0,0003394  |
| Guanylate kinase 1                                                       | <i>Guk1</i>          | 1,60240841 | 0,00016042 |
| Sulfite oxidase                                                          | <i>Suox</i>          | 1,60153437 | 2,65e-05   |
| Rio kinase 3                                                             | <i>Riok3</i>         | 1,6013518  | 0,0001214  |
| Angiotensin ii, type i receptor-associated protein                       | <i>Agtrap</i>        | 1,60118062 | 0,00051421 |
| Dual specificity phosphatase 13                                          | <i>Dusp13</i>        | 1,60051783 | 0,00019796 |
| Heme binding protein 2                                                   | <i>Hebp2</i>         | 1,60032344 | 0,00085632 |
| Udp-glucose glycoprotein glucosyltransferase 1                           | <i>Ugg1</i>          | 1,60016999 | 0,00090748 |
| Hras-like suppressor                                                     | <i>Hrasls</i>        | 1,59968398 | 0,00062142 |
| Dicer 1, ribonuclease type iii                                           | <i>Dicer1</i>        | 1,59856677 | 0,00010969 |
| Coiled-coil-helix-coiled-coil-helix domain containing 5                  | <i>Chchd5</i>        | 1,59829953 | 0,00018622 |
| At hook containing transcription factor 1                                | <i>Ahctf1</i>        | 1,59800347 | 0,00020104 |
| Dead (asp-glu-ala-asp) box polypeptide 24                                | <i>Ddx24</i>         | 1,59794708 | 2,60e-05   |
| Ring finger protein 44                                                   | <i>Rnf44</i>         | 1,59751709 | 0,0001026  |
| Brx1, biogenesis of ribosomes, homolog (s. Cerevisiae)                   | <i>Brix1</i>         | 1,59725363 | 0,00040063 |
| Riken cdna 1700123o20 gene                                               | <i>1700123o20rik</i> | 1,59715748 | 0,00017388 |
| Atypical chemokine receptor 3                                            | <i>Ackr3</i>         | 1,59669983 | 0,00036519 |
| Zinc finger protein 202                                                  | <i>Zfp202</i>        | 1,59625952 | 6,72e-05   |
| Wd repeat domain 75                                                      | <i>Wdr75</i>         | 1,59602543 | 3,37e-05   |
| Pregnancy upregulated non-ubiquitously expressed cam kinase              | <i>Pnck</i>          | 1,59580745 | 0,00285236 |
| Nima (never in mitosis gene a)-related expressed kinase 7                | <i>Nek7</i>          | 1,59521461 | 0,00012737 |
| General transcription factor ii i repeat domain-containing 1             | <i>Gtf2ird1</i>      | 1,59468566 | 0,00019829 |
| ATPase, Na <sup>+</sup> /K <sup>+</sup> transporting, beta 3 polypeptide | <i>Atp1b3</i>        | 1,59457328 | 0,00032528 |
| Cell adhesion molecule 4                                                 | <i>Cadm4</i>         | 1,59385664 | 0,00112655 |
| Nuclear receptor coactivator 4                                           | <i>Ncoa4</i>         | 1,59371726 | 0,00134629 |
| Gid complex subunit 4, vid24 homolog (s. Cerevisiae)                     | <i>Gid4</i>          | 1,59370386 | 0,00127126 |
| Glutamate receptor, ionotropic, kainate 5 (gamma 2)                      | <i>Grik5</i>         | 1,59364143 | 0,00137815 |
| Matrix metalloproteinase 12                                              | <i>Mmp12</i>         | 1,59336148 | 0,00126663 |
| Leucine zipper protein 1                                                 | <i>Luzp1</i>         | 1,59294852 | 0,00084351 |
| Glypican 1                                                               | <i>Gpc1</i>          | 1,59238461 | 2,43e-05   |
| Secretory carrier membrane protein 3                                     | <i>Scamp3</i>        | 1,59201436 | 1,77e-05   |
| Lim domain only 4                                                        | <i>Lmo4</i>          | 1,59161726 | 5,34e-05   |

|                                                                          |                           |            |            |
|--------------------------------------------------------------------------|---------------------------|------------|------------|
| Peptidylglycine alpha-amidating monooxygenase                            | <i>Pam</i>                | 1,59111006 | 0,00460184 |
| Atpase, h <sup>+</sup> transporting, lysosomal v1 subunit f              | <i>Atp6v1f</i>            | 1,59082359 | 7,39e-05   |
| Phosphorylated adaptor for rna export                                    | <i>Phax</i>               | 1,59076085 | 0,00165433 |
| Lim and senescent cell antigen like domains 2                            | <i>Lims2</i>              | 1,59060915 | 0,00257224 |
| Deah (asp-glu-ala-his) box polypeptide 36                                | <i>Dhx36</i>              | 1,59004201 | 0,00028347 |
| Serta domain containing 2                                                | <i>Sertad2</i>            | 1,58994529 | 2,81e-05   |
| Serine racemase                                                          | <i>Srr</i>                | 1,58988138 | 7,23e-05   |
| Multiple inositol polyphosphate histidine phosphatase 1                  | <i>Minpp1</i>             | 1,58918363 | 0,00154933 |
| Zinc finger protein 768                                                  | <i>Zfp768</i>             | 1,5887981  | 0,00089716 |
| Cullin 2                                                                 | <i>Cul2</i>               | 1,58842593 | 0,00158779 |
| M phase phosphoprotein 6                                                 | <i>Mphosph6</i>           | 1,58804225 | 9,39e-05   |
| Leucyl-trna synthetase                                                   | <i>Lars</i>               | 1,58772261 | 3,99e-05   |
| Acyl-coenzyme a dehydrogenase, medium chain                              | <i>Acadm</i>              | 1,58740644 | 3,86e-05   |
| Mus musculus zinc finger protein 697 (zfp697),<br>mrna.                  | <i>Zfp697</i>             | 1,58731838 | 0,00070048 |
| Dystrobrevin alpha                                                       | <i>Dtna</i>               | 1,58700068 | 6,92e-05   |
| Interleukin 11                                                           | <i>Il11</i>               | 1,5866137  | 0,00036709 |
| F-box and wd-40 domain protein 11                                        | <i>Fbxw11</i>             | 1,58578674 | 9,70e-05   |
| Ephrin a4                                                                | <i>Efna4</i>              | 1,58549751 | 0,00069195 |
| Gem (nuclear organelle) associated protein 7                             | <i>Gemin7</i>             | 1,58484746 | 0,00078119 |
| Telomeric repeat binding factor 2, interacting protein                   | <i>Terf2ip</i>            | 1,58447059 | 0,00162572 |
| Poly (adp-ribose) polymerase family, member 10 ///<br>plectin            | <i>Parp10 /// plec</i>    | 1,58438561 | 0,00236934 |
| Musashi rna-binding protein 1                                            | <i>Msi1</i>               | 1,58391308 | 0,00096983 |
| Mitochondrial ribosomal protein l39                                      | <i>Mrpl39</i>             | 1,58377168 | 0,00010445 |
| Deah (asp-glu-ala-his) box polypeptide 30                                | <i>Dhx30</i>              | 1,58334322 | 0,00019478 |
| Zyg-ll family member b, cell cycle regulator                             | <i>Zyg11b</i>             | 1,58303731 | 0,00451346 |
| Latent transforming growth factor beta binding<br>protein 1              | <i>Ltbp1</i>              | 1,58251494 | 0,00038133 |
| Tata box binding protein (tbp)-associated factor, rna<br>polymerase i, c | <i>Taf1c</i>              | 1,58240081 | 9,14e-05   |
| Solute carrier family 22 (organic cation transporter),<br>member 5       | <i>Slc22a5</i>            | 1,58180361 | 0,00020322 |
| Rab14, member ras oncogene family                                        | <i>Rab14</i>              | 1,58139837 | 0,00115844 |
| R3h domain containing 1                                                  | <i>R3hdm1</i>             | 1,58103261 | 5,03e-05   |
| Slu7 splicing factor homolog (s. Cerevisiae)                             | <i>Slu7</i>               | 1,58055626 | 0,00054025 |
| Protocadherin alpha 1 /// protocadherin alpha 10 ///                     | <i>Pcdha1 /// pcdha10</i> | 1,58046509 | 0,00016674 |

|                                                       |                                      |            |            |
|-------------------------------------------------------|--------------------------------------|------------|------------|
| protocadherin alpha 11 /// protocadherin alpha 12 /// | /// <i>pcdha11</i> ///               |            |            |
| protocadherin alpha 2 /// protocadherin alpha 3 ///   | <i>pcdha12</i> /// <i>pcdha2</i> /// |            |            |
| protocadherin alpha 4 /// protocadherin alpha 5 ///   | <i>pcdha3</i> /// <i>pcdha4</i> ///  |            |            |
| protocadherin alpha 6 /// protocadherin alpha 7 ///   | <i>pcdha5</i> /// <i>pcdha6</i> ///  |            |            |
| protocadherin alpha 8 /// protocadherin alpha 9 ///   | <i>pcdha7</i> /// <i>pcdha8</i> ///  |            |            |
| protocadherin alpha subfamily c, 1 /// protocadherin  | <i>pcdha9</i> /// <i>pcdhac1</i> /// |            |            |
| alpha subfamily c, 2                                  | <i>pcdhac2</i>                       |            |            |
| Transmembrane protein 135                             | <i>Tmem135</i>                       | 1,58014179 | 0,00044312 |
| Procollagen-lysine, 2-oxoglutarate 5-dioxygenase 3    | <i>Plod3</i>                         | 1,57998676 | 8,08e-05   |
| Oxysterol binding protein-like 11                     | <i>Osbp11</i>                        | 1,5796321  | 0,00058662 |
| Melanoma antigen, family d, 2                         | <i>Maged2</i>                        | 1,57925343 | 2,71e-05   |
| Large tumor suppressor 2                              | <i>Lats2</i>                         | 1,57860158 | 0,00053282 |
| Zinc finger with krab and scan domains 14             | <i>Zkscan14</i>                      | 1,57841349 | 0,00053003 |
| Spermatogenesis associated 6                          | <i>Spata6</i>                        | 1,57785282 | 0,001489   |
| Rna terminal phosphate cyclase-like 1                 | <i>Rcl1</i>                          | 1,57572451 | 1,69e-05   |
| Proline-serine-threonine phosphatase-interacting      | <i>Pstpip2</i>                       | 1,5757237  | 0,00046938 |
| protein 2                                             |                                      |            |            |
| Asparagine-linked glycosylation 3 (alpha-1,3-         | <i>Alg3</i>                          | 1,57557846 | 0,00027314 |
| mannosyltransferase)                                  |                                      |            |            |
| Protein phosphatase 1, regulatory (inhibitor) subunit | <i>Ppp1r2</i>                        | 1,5753526  | 0,00010472 |
| 2                                                     |                                      |            |            |
| Family with sequence similarity 117, member b         | <i>Fam117b</i>                       | 1,57432354 | 4,47e-05   |
| Myocyte enhancer factor 2d                            | <i>Mef2d</i>                         | 1,57408113 | 0,00011744 |
| Gram domain containing 1a                             | <i>Gramd1a</i>                       | 1,57339935 | 0,00019657 |
| Cytoplasmic polyadenylation element binding           | <i>Cpeb3</i>                         | 1,57251725 | 0,00032263 |
| protein 3                                             |                                      |            |            |
| Vacuolar protein sorting 37a (yeast)                  | <i>Vps37a</i>                        | 1,57244013 | 0,00043222 |
| Ras homolog enriched in brain like 1                  | <i>Rhebl1</i>                        | 1,57198503 | 0,0002669  |
| Tetratricopeptide repeat domain 28                    | <i>Ttc28</i>                         | 1,57155719 | 0,0019757  |
| Protoporphyrinogen oxidase                            | <i>Ppox</i>                          | 1,57127239 | 0,00852111 |
| Acylpeptide hydrolase                                 | <i>Apeh</i>                          | 1,5710519  | 8,70e-05   |
| Fatty acid desaturase 3                               | <i>Fads3</i>                         | 1,57037026 | 6,29e-05   |
| Axin interactor, dorsalization associated             | <i>Aida</i>                          | 1,57008196 | 0,00014372 |
| Zinc finger ccch type containing 8                    | <i>Zc3h8</i>                         | 1,56993888 | 0,00104308 |
| Forty-two-three domain containing 1                   | <i>Fytd1</i>                         | 1,56965096 | 0,0004049  |
| Signal recognition particle 9                         | <i>Srp9</i>                          | 1,56903414 | 0,00012549 |
| Unc-50 homolog (c. Elegans)                           | <i>Unc50</i>                         | 1,56787187 | 3,28e-05   |
| Aminolevulinic acid synthase 1                        | <i>Alas1</i>                         | 1,56688158 | 8,20e-05   |

|                                                                                                            |                      |            |            |
|------------------------------------------------------------------------------------------------------------|----------------------|------------|------------|
| Early b cell factor 1                                                                                      | <i>Ebf1</i>          | 1,5666488  | 0,00039417 |
| Ga repeat binding protein, alpha                                                                           | <i>Gabpa</i>         | 1,56646796 | 0,00244525 |
| Adaptor-related protein complex 3, mu 2 subunit                                                            | <i>Ap3m2</i>         | 1,56628331 | 0,00743909 |
| Heparin-binding egf-like growth factor                                                                     | <i>Hbegf</i>         | 1,56600367 | 0,0001781  |
| Dual-specificity tyrosine-(y)-phosphorylation regulated kinase 1a                                          | <i>Dyrk1a</i>        | 1,56507484 | 0,00330167 |
| Hyaluronoglucosaminidase 2                                                                                 | <i>Hyal2</i>         | 1,56497575 | 6,43e-05   |
| Flt3 interacting zinc finger protein 1                                                                     | <i>Fiz1</i>          | 1,56415683 | 5,04e-05   |
| ATPase, H <sup>+</sup> transporting, lysosomal accessory protein 2                                         | <i>Atp6ap2</i>       | 1,5636925  | 0,00059382 |
| Toll-like receptor 4                                                                                       | <i>Tlr4</i>          | 1,56360016 | 0,00458512 |
| Component of oligomeric golgi complex 8 /// peptide deformylase (mitochondrial)                            | <i>Cog8 /// pdf</i>  | 1,56357638 | 8,58e-05   |
| Histidine triad nucleotide binding protein 2                                                               | <i>Hint2</i>         | 1,56353725 | 8,23e-05   |
| Bromodomain adjacent to zinc finger domain, 2b                                                             | <i>Baz2b</i>         | 1,56348541 | 0,00025181 |
| Hydroxysteroid (17-beta) dehydrogenase 4                                                                   | <i>Hsd17b4</i>       | 1,56339817 | 0,00043978 |
| Solute carrier organic anion transporter family, member 3a1                                                | <i>Slco3a1</i>       | 1,56261125 | 0,00027602 |
| Solute carrier family 25 (mitochondrial carrier ornithine transporter), member 15                          | <i>Slc25a15</i>      | 1,56247613 | 0,00067972 |
| Protein-kinase, interferon-inducible double stranded rna dependent inhibitor, repressor of (p58 repressor) | <i>Prkrr</i>         | 1,56202768 | 0,0008736  |
| Zinc finger protein 503                                                                                    | <i>Zfp503</i>        | 1,56174082 | 0,00577634 |
| Frataxin                                                                                                   | <i>Fxn</i>           | 1,56113678 | 0,00020562 |
| Thyroid hormone receptor interactor 4                                                                      | <i>Trip4</i>         | 1,55980458 | 7,51e-05   |
| Cytosolic thiouridylase subunit 1 homolog (s. Pombe)                                                       | <i>Ctu1</i>          | 1,55912745 | 0,00053018 |
| Nuclear factor, erythroid derived 2,-like 1                                                                | <i>Nfe2l1</i>        | 1,55835858 | 0,00012962 |
| DnaJ (hsp40) homolog, subfamily c, member 5                                                                | <i>Dnajc5</i>        | 1,55813972 | 0,00213033 |
| Uba-like domain containing 1                                                                               | <i>Ubal1</i>         | 1,55787088 | 0,00581513 |
| Homer homolog 1 (drosophila)                                                                               | <i>Homer1</i>        | 1,55767041 | 0,00424025 |
| Thioredoxin domain containing 17                                                                           | <i>Txndc17</i>       | 1,55743398 | 0,00361946 |
| Ptk2 protein tyrosine kinase 2 beta                                                                        | <i>Ptk2b</i>         | 1,55730616 | 0,00143644 |
| Choline/ethanolaminephosphotransferase 1                                                                   | <i>Cept1</i>         | 1,55691029 | 7,50e-05   |
| Riken cDNA 4931406c07 gene                                                                                 | <i>4931406c07rik</i> | 1,55669904 | 8,22e-05   |
| Oxidoreductase like domain containing 1                                                                    | <i>Oxld1</i>         | 1,55645161 | 0,00144407 |
| Transmembrane 9 superfamily protein member 4                                                               | <i>Tm9sf4</i>        | 1,55578142 | 0,00078039 |
| Mitochondrial ribosomal protein l43                                                                        | <i>Mrpl43</i>        | 1,55568067 | 0,00018953 |

|                                                                                                                  |                                 |            |            |
|------------------------------------------------------------------------------------------------------------------|---------------------------------|------------|------------|
| Interleukin 6 signal transducer                                                                                  | <i>Il6st</i>                    | 1,55506359 | 0,00289939 |
| Carcinoembryonic antigen-related cell adhesion molecule 1                                                        | <i>Ceacam1</i>                  | 1,5550346  | 0,00173721 |
| Phosphorylase kinase, gamma 2 (testis)                                                                           | <i>Phkg2</i>                    | 1,55468627 | 0,00013698 |
| Tumor suppressor candidate 2                                                                                     | <i>Tusc2</i>                    | 1,55453949 | 9,21e-05   |
| Activating signal cointegrator 1 complex subunit 2                                                               | <i>Ascc2</i>                    | 1,55442468 | 0,0001869  |
| Pseudouridylylate synthase 7 homolog (s. Cerevisiae)                                                             | <i>Pus7</i>                     | 1,55440504 | 0,00014709 |
| Microfibrillar-associated protein 1a /// microfibrillar-associated protein 1b                                    | <i>Mfap1a</i> /// <i>mfap1b</i> | 1,55396023 | 4,76e-05   |
| Wd repeat domain 46                                                                                              | <i>Wdr46</i>                    | 1,55380629 | 0,00139061 |
| Exosome component 9                                                                                              | <i>Exosc9</i>                   | 1,55375418 | 5,09e-05   |
| Ankyrin 3, epithelial                                                                                            | <i>Ank3</i>                     | 1,55314444 | 0,00113725 |
| Sjogren's syndrome/scleroderma autoantigen 1 homolog (human)                                                     | <i>Sssca1</i>                   | 1,55299856 | 0,00905587 |
| Ctnbp2 n-terminal like                                                                                           | <i>Ctnbp2nl</i>                 | 1,55270745 | 0,00590892 |
| Peroxisomal biogenesis factor 26                                                                                 | <i>Pex26</i>                    | 1,55264991 | 0,00033075 |
| Gamma-glutamylamine cyclotransferase                                                                             | <i>Ggact</i>                    | 1,55261605 | 0,00636678 |
| Sema domain, transmembrane domain (tm), and cytoplasmic domain, (semaphorin) 6a                                  | <i>Sema6a</i>                   | 1,5525168  | 0,00614469 |
| Sema domain, immunoglobulin domain (ig), transmembrane domain (tm) and short cytoplasmic domain, (semaphorin) 4a | <i>Sema4a</i>                   | 1,55234632 | 0,00021034 |
| Cytidine 5'-triphosphate synthase 2                                                                              | <i>Ctps2</i>                    | 1,55209339 | 6,00e-05   |
| Poly (adp-ribose) polymerase family, member 4                                                                    | <i>Parp4</i>                    | 1,55175539 | 0,00146826 |
| Ceroid-lipofuscinosis, neuronal 5                                                                                | <i>Cln5</i>                     | 1,55163897 | 0,00050719 |
| Zinc finger and btb domain containing 22                                                                         | <i>Zbtb22</i>                   | 1,55158161 | 7,36e-05   |
| Dnaj (hsp40) homolog, subfamily c, member 11                                                                     | <i>Dnajc11</i>                  | 1,55157151 | 6,09e-05   |
| Imp4, u3 small nucleolar ribonucleoprotein, homolog (yeast)                                                      | <i>Imp4</i>                     | 1,55124911 | 0,00151513 |
| Family with sequence similarity 222, member b                                                                    | <i>Fam222b</i>                  | 1,55086899 | 0,00045797 |
| Regulator of calcineurin 1                                                                                       | <i>Rcan1</i>                    | 1,55055999 | 5,12e-05   |
| Inhibitor of kappa light polypeptide enhancer in b cells, kinase complex-associated protein                      | <i>Ikbkap</i>                   | 1,55007231 | 0,0001118  |
| Coilin                                                                                                           | <i>Coil</i>                     | 1,5499295  | 0,00085296 |
| Serine incorporator 3                                                                                            | <i>Serinc3</i>                  | 1,54991749 | 0,00191971 |
| Hexosaminidase b                                                                                                 | <i>Hexb</i>                     | 1,5498362  | 0,00127865 |
| Tnf receptor-associated factor 6                                                                                 | <i>Traf6</i>                    | 1,54924647 | 0,00017142 |
| Actin, alpha 1, skeletal muscle                                                                                  | <i>Acta1</i>                    | 1,54905677 | 0,00042157 |

|                                                                            |                                  |            |            |
|----------------------------------------------------------------------------|----------------------------------|------------|------------|
| Tumor protein d52-like 2                                                   | <i>Tpd52l2</i>                   | 1,54884053 | 0,00010356 |
| Insulin-like 6                                                             | <i>Insl6</i>                     | 1,54869908 | 0,0030599  |
| Riken cdna 0610010b08 gene /// predicted gene 14308                        | <i>0610010b08rik ///</i>         | 1,54824258 | 0,00945271 |
| /// predicted gene 14326 /// predicted gene 14391 ///                      | <i>gm14308 ///</i>               |            |            |
| predicted gene 14430 /// predicted gene 14434 ///                          | <i>gm14326 ///</i>               |            |            |
| predicted gene 4724 /// uncharacterized loc102639426                       | <i>gm14391 ///</i>               |            |            |
|                                                                            | <i>gm14430 ///</i>               |            |            |
|                                                                            | <i>gm14434 ///</i> <i>gm4724</i> |            |            |
|                                                                            | <i>/// loc102639426</i>          |            |            |
| Hepatitis a virus cellular receptor 2                                      | <i>Havcr2</i>                    | 1,54822708 | 0,00246164 |
| Camp responsive element binding protein 3                                  | <i>Creb3</i>                     | 1,54776171 | 0,00047482 |
| Nuclear import 7 homolog (s. Cerevisiae)                                   | <i>Nip7</i>                      | 1,54771828 | 0,00054193 |
| Family with sequence similarity 58, member b                               | <i>Fam58b</i>                    | 1,5474881  | 0,00035855 |
| Lysophospholipase-like 1                                                   | <i>Lyplal1</i>                   | 1,54655151 | 0,00040426 |
| Zeta-chain (tcr) associated protein kinase                                 | <i>Zap70</i>                     | 1,54623321 | 0,00027923 |
| Sprouty homolog 1 (drosophila)                                             | <i>Spry1</i>                     | 1,54445985 | 0,00022021 |
| Transmembrane protein 185b                                                 | <i>Tmem185b</i>                  | 1,54435392 | 0,0007579  |
| Sperm antigen with calponin homology and coiled-coil domains 1             | <i>Specc1</i>                    | 1,54399771 | 0,00013726 |
| Phospholipase c, delta 1                                                   | <i>Plcd1</i>                     | 1,54389739 | 0,00035634 |
| Ubiquitin specific peptidase 38                                            | <i>Usp38</i>                     | 1,5437893  | 0,00130086 |
| Coiled-coil domain containing 22                                           | <i>Ccdc22</i>                    | 1,54362634 | 0,00100432 |
| Laminin, gamma 2                                                           | <i>Lamc2</i>                     | 1,54351774 | 4,62e-05   |
| Leucine carboxyl methyltransferase 2                                       | <i>Lcmt2</i>                     | 1,54349834 | 0,00020231 |
| 60s ribosomal protein l23-like /// 60s ribosomal                           | <i>Loc100044627 ///</i>          | 1,543147   | 3,87e-05   |
| protein l23-like /// ribosomal protein l23                                 | <i>loc100862455 ///</i>          |            |            |
|                                                                            | <i>rpl23</i>                     |            |            |
| Aldo-keto reductase family 7, member a5 (aflatoxin aldehyde reductase)     | <i>Akr7a5</i>                    | 1,54301078 | 0,0002046  |
| Solute carrier family 10 (sodium/bile acid cotransporter family), member 3 | <i>Slc10a3</i>                   | 1,54297152 | 3,78e-05   |
| Polymerase (rna) ii (dna directed) polypeptide h                           | <i>Polr2h</i>                    | 1,54283607 | 9,02e-05   |
| Pax3 and pax7 binding protein 1                                            | <i>Paxbp1</i>                    | 1,54161637 | 0,00037301 |
| Abhydrolase domain containing 10                                           | <i>Abhd10</i>                    | 1,54069081 | 0,00149289 |
| Myosin xviii                                                               | <i>Myo18a</i>                    | 1,54055019 | 0,00163859 |
| Thioredoxin domain containing 9                                            | <i>Txndc9</i>                    | 1,54015674 | 0,00033502 |
| Ribonucleotide reductase m2 b (tp53 inducible)                             | <i>Rrm2b</i>                     | 1,54012332 | 0,00065903 |
| Ariadne ubiquitin-conjugating enzyme e2 binding                            | <i>Arih1</i>                     | 1,53861868 | 0,00086467 |

|                                                                          |                             |            |            |
|--------------------------------------------------------------------------|-----------------------------|------------|------------|
| protein homolog 1 (drosophila)                                           |                             |            |            |
| Ribosomal protein l31 /// ribosomal protein l31, pseudogene 1 2          | <i>Rpl31 /// rpl31-ps12</i> | 1,5380016  | 0,00047397 |
| Smg-8 homolog, nonsense mediated mrna decay factor (c. Elegans)          | <i>Smg8</i>                 | 1,53797463 | 0,0006113  |
| Tea domain family member 4                                               | <i>Tead4</i>                | 1,53727823 | 0,00038625 |
| Sec14-like 2 (s. Cerevisiae)                                             | <i>Sec14l2</i>              | 1,5366997  | 0,0013034  |
| Zinc finger protein 160                                                  | <i>Zfp160</i>               | 1,53626342 | 0,0001192  |
| Testis expressed gene 264                                                | <i>Tex264</i>               | 1,53593795 | 0,00014329 |
| Polymerase (rna) i polypeptide d                                         | <i>Polr1d</i>               | 1,53547394 | 0,00016413 |
| Solute carrier family 6 (neurotransmitter transporter), member 17        | <i>Slc6a17</i>              | 1,53537663 | 0,00146111 |
| Small arfgap 1                                                           | <i>Smap1</i>                | 1,53528431 | 0,00136682 |
| Family with sequence similarity 96, member a                             | <i>Fam96a</i>               | 1,53493962 | 0,00350161 |
| N-myc (and stat) interactor                                              | <i>Nmi</i>                  | 1,53480121 | 0,0001587  |
| Cytochrome c oxidase assembly protein 17                                 | <i>Cox17</i>                | 1,53471204 | 0,00031276 |
| Listerin e3 ubiquitin protein ligase 1                                   | <i>Ltn1</i>                 | 1,53456838 | 0,0006646  |
| Cd47 antigen (rh-related antigen, integrin-associated signal transducer) | <i>Cd47</i>                 | 1,53440465 | 7,36e-05   |
| Hydroxysteroid (17-beta) dehydrogenase 2                                 | <i>Hsd17b2</i>              | 1,5341482  | 8,91e-05   |
| Synaptopodin 2                                                           | <i>Synpo2</i>               | 1,53405496 | 6,28e-05   |
| Rab34, member ras oncogene family                                        | <i>Rab34</i>                | 1,53405393 | 4,46e-05   |
| Mitochondrial ribosomal protein s9                                       | <i>Mrps9</i>                | 1,53363679 | 0,00029104 |
| N-acetyltransferase 9 (gcn5-related, putative)                           | <i>Nat9</i>                 | 1,53359412 | 0,00030604 |
| Protein kinase domain containing, cytoplasmic                            | <i>Pkdcc</i>                | 1,53332187 | 0,00539783 |
| Yae1 domain containing 1                                                 | <i>Yae1d1</i>               | 1,53271329 | 0,0024532  |
| Ring finger protein 185                                                  | <i>Rnf185</i>               | 1,53178693 | 4,95e-05   |
| Angiopoietin 1                                                           | <i>Angpt1</i>               | 1,53156621 | 0,00466856 |
| S100 calcium binding protein a13                                         | <i>S100a13</i>              | 1,53133705 | 0,0001516  |
| Flavin containing monooxygenase 5                                        | <i>Fmo5</i>                 | 1,5309132  | 0,00070349 |
| A disintegrin and metallopeptidase domain 15 (metargidin)                | <i>Adam15</i>               | 1,53079177 | 0,00028242 |
| Twinfilin, actin-binding protein, homolog 2 (drosophila)                 | <i>Twf2</i>                 | 1,53075174 | 0,00214566 |
| Catenin beta interacting protein 1                                       | <i>Ctnnbip1</i>             | 1,53063076 | 0,00057168 |
| Zinc finger protein 275                                                  | <i>Zfp275</i>               | 1,5303659  | 0,00011857 |
| Hephaestin                                                               | <i>Heph</i>                 | 1,53035592 | 0,00282073 |
| Inhibitor of bruton agammaglobulinemia tyrosine                          | <i>Ibtk</i>                 | 1,53022292 | 0,00014212 |



|                                                                                                 |                 |            |            |
|-------------------------------------------------------------------------------------------------|-----------------|------------|------------|
| kinase                                                                                          |                 |            |            |
| 6-pyruvoyl-tetrahydropterin synthase                                                            | <i>Pts</i>      | 1,53017307 | 0,00090366 |
| Autophagy related 12                                                                            | <i>Atg12</i>    | 1,52963298 | 0,00020773 |
| Small integral membrane protein 7                                                               | <i>Smim7</i>    | 1,5282908  | 0,00103471 |
| Mitochondrial antiviral signaling protein                                                       | <i>Mavs</i>     | 1,52813997 | 0,00301709 |
| Lps-induced tn factor                                                                           | <i>Litaf</i>    | 1,52802906 | 0,00017428 |
| Thioredoxin domain containing 11                                                                | <i>Txndc11</i>  | 1,5274415  | 0,00135376 |
| Phd finger protein 23                                                                           | <i>Phf23</i>    | 1,526988   | 0,00012159 |
| Atpase family, aaa domain containing 1                                                          | <i>Atad1</i>    | 1,52681544 | 0,0041216  |
| Excision repair cross-complementing rodent repair deficiency, complementation group 6 like 2    | <i>Ercc6l2</i>  | 1,52651532 | 0,00392162 |
| F-box protein 28                                                                                | <i>Fbxo28</i>   | 1,52601218 | 0,00019226 |
| Solute carrier family 25, member 44                                                             | <i>Slc25a44</i> | 1,52587468 | 0,00029936 |
| Leucine rich repeat containing 51                                                               | <i>Lrrc51</i>   | 1,52477877 | 0,00218402 |
| Acid phosphatase 5, tartrate resistant                                                          | <i>Acp5</i>     | 1,52468593 | 0,00254197 |
| Rab interacting factor                                                                          | <i>Rabif</i>    | 1,52465423 | 0,00050463 |
| Cathepsin d                                                                                     | <i>Ctsd</i>     | 1,52408503 | 3,50e-05   |
| Diphthamine biosynthesis 6                                                                      | <i>Dph6</i>     | 1,52405578 | 0,00011062 |
| B cell leukemia/lymphoma 6                                                                      | <i>Bcl6</i>     | 1,52389858 | 0,0056631  |
| Tight junction protein 2                                                                        | <i>Tjp2</i>     | 1,52265445 | 0,00035472 |
| Nadh dehydrogenase (ubiquinone) 1 alpha subcomplex 10                                           | <i>Ndufa10</i>  | 1,52258854 | 7,40e-05   |
| Elongation protein 4 homolog (s. Cerevisiae)                                                    | <i>Elp4</i>     | 1,52253862 | 0,00087754 |
| Synaptotagmin xi                                                                                | <i>Syt11</i>    | 1,52167129 | 0,00802901 |
| Period circadian clock 2                                                                        | <i>Per2</i>     | 1,52092354 | 0,00083337 |
| Mediator complex subunit 12                                                                     | <i>Med12</i>    | 1,5198952  | 0,00462923 |
| Cgg triplet repeat binding protein 1                                                            | <i>Cggbp1</i>   | 1,5193337  | 5,76e-05   |
| Sideroflexin 4                                                                                  | <i>Sfxn4</i>    | 1,51892509 | 0,0009309  |
| Clp1, cleavage and polyadenylation factor i subunit                                             | <i>Clp1</i>     | 1,51833086 | 0,00029096 |
| Small proline-rich protein 2d                                                                   | <i>Sprr2d</i>   | 1,51819843 | 0,00196454 |
| Mob family member 4, phocein                                                                    | <i>Mob4</i>     | 1,51772094 | 0,00088338 |
| Dual specificity phosphatase 10                                                                 | <i>Dusp10</i>   | 1,51759686 | 0,00022812 |
| Gram domain containing 3                                                                        | <i>Gramd3</i>   | 1,51727122 | 0,0014965  |
| Protein phosphatase 2, regulatory subunit b', gamma                                             | <i>Ppp2r5c</i>  | 1,51722288 | 0,00030688 |
| Myeloid/lymphoid or mixed-lineage leukemia (trithorax homolog, drosophila); translocated to, 10 | <i>Mllt10</i>   | 1,51715188 | 0,00055804 |
| Solute carrier family 37 (glycerol-3-phosphate transporter), member 2                           | <i>Slc37a2</i>  | 1,5159484  | 0,00269469 |

|                                                                                           |                         |            |            |
|-------------------------------------------------------------------------------------------|-------------------------|------------|------------|
| Interferon activated gene 205 /// myeloid cell nuclear differentiation antigen            | <i>Ifi205 /// mnda</i>  | 1,51563533 | 0,00015992 |
| Sirtuin 4                                                                                 | <i>Sirt4</i>            | 1,51434    | 0,00144734 |
| Kat8 regulatory nsl complex subunit 1-like                                                | <i>Kansl1l</i>          | 1,51409521 | 0,00050857 |
| Riken cDNA B230118h07 gene                                                                | <i>B230118h07rik</i>    | 1,51381354 | 0,00019969 |
| Gem (nuclear organelle) associated protein 8                                              | <i>Gemin8</i>           | 1,51356793 | 0,00151963 |
| Leucine rich repeat containing 8a                                                         | <i>Lrrc8a</i>           | 1,51235354 | 0,00018976 |
| Ubiquitin specific peptidase 3                                                            | <i>Usp3</i>             | 1,51106199 | 0,00031735 |
| Protein arginine n-methyltransferase 7                                                    | <i>Prmt7</i>            | 1,51092281 | 0,00102691 |
| Anoctamin 10                                                                              | <i>Ano10</i>            | 1,51076161 | 0,00015905 |
| Transmembrane protein 9                                                                   | <i>Tmem9</i>            | 1,51074128 | 0,00082102 |
| Ubiquitin-conjugating enzyme e2b                                                          | <i>Ube2b</i>            | 1,51027994 | 6,69e-05   |
| Polymerase (RNA) III (DNA directed) polypeptide c                                         | <i>Polr3c</i>           | 1,50967538 | 0,00039022 |
| Amylase 1, salivary                                                                       | <i>Amy1</i>             | 1,50925042 | 0,00368662 |
| Nop56 ribonucleoprotein                                                                   | <i>Nop56</i>            | 1,50920384 | 0,00178373 |
| Thap domain containing 4                                                                  | <i>Thap4</i>            | 1,50918017 | 0,00017406 |
| Hydroxysteroid (17-beta) dehydrogenase 12                                                 | <i>Hsd17b12</i>         | 1,50885753 | 0,00159766 |
| Family with sequence similarity 160, member a2                                            | <i>Fam160a2</i>         | 1,5086878  | 0,00517831 |
| DnaJ (Hsp40) homolog, subfamily C, member 1                                               | <i>Dnajc1</i>           | 1,50867323 | 0,00197649 |
| Zinc finger protein 354a                                                                  | <i>Zfp354a</i>          | 1,50829753 | 0,00451104 |
| Vma21 vacuolar H <sup>+</sup> -ATPase homolog (S. cerevisiae)                             | <i>Vma21</i>            | 1,50821642 | 0,00703088 |
| Brain abundant, membrane attached signal protein 1                                        | <i>Basp1</i>            | 1,50808584 | 4,73e-05   |
| Heme oxygenase (decycling) 1                                                              | <i>Hmox1</i>            | 1,50786228 | 0,00018601 |
| Tyrosyl-DNA phosphodiesterase 1                                                           | <i>Tdp1</i>             | 1,50767415 | 0,00043214 |
| Growth arrest and DNA-damage-inducible 45 alpha                                           | <i>Gadd45a</i>          | 1,50761023 | 0,00055804 |
| Rfa1, flavin adenine dinucleotide synthetase, homolog (yeast) /// lens epithelial protein | <i>Flad1 /// lenep</i>  | 1,50747882 | 0,0022412  |
| Glycogen synthase kinase 3 beta                                                           | <i>Gsk3b</i>            | 1,50565372 | 0,00243789 |
| Involucrin                                                                                | <i>Iol</i>              | 1,50496401 | 0,00058664 |
| RNA (guanine-7-) methyltransferase                                                        | <i>Rnmt</i>             | 1,5047874  | 0,00120367 |
| Ubiquitin-conjugating enzyme e2r 2                                                        | <i>Ube2r2</i>           | 1,50470308 | 0,0008432  |
| Rab33b, member Ras oncogene family                                                        | <i>Rab33b</i>           | 1,50453531 | 0,00129999 |
| Fibrous sheath-interacting protein 1                                                      | <i>Fsip1</i>            | 1,50435087 | 0,00174671 |
| Predicted gene 3650 /// spastic paraplegia 11                                             | <i>Gm3650 /// spg11</i> | 1,50408991 | 0,0001677  |
| Zinc finger protein 451                                                                   | <i>Zfp451</i>           | 1,50406715 | 0,00068684 |
| Mitochondria localized glutamic acid rich protein                                         | <i>Mgarp</i>            | 1,50388358 | 0,00230525 |
| Rab GTPase activating protein 1-like                                                      | <i>Rabgap1l</i>         | 1,50355053 | 0,00043674 |
| Signal transducer and activator of transcription 1                                        | <i>Stat1</i>            | 1,5035331  | 0,00705267 |

|                                                                               |                                 |            |            |
|-------------------------------------------------------------------------------|---------------------------------|------------|------------|
| Crystallin, zeta (quinone reductase)-like 1                                   | <i>Cryz11</i>                   | 1,50333808 | 0,00011412 |
| Mitofusin 2                                                                   | <i>Mfn2</i>                     | 1,50254442 | 0,00026795 |
| Kelch domain containing 3                                                     | <i>Klhdc3</i>                   | 1,50223617 | 0,00203213 |
| Surfeit gene 1                                                                | <i>Surf1</i>                    | 1,50185861 | 0,00125748 |
| Transmembrane protein 219                                                     | <i>Tmem219</i>                  | 1,50166037 | 0,00253175 |
| Phosphatidylinositol glycan anchor biosynthesis, class y-like                 | <i>Pigyl</i>                    | 1,50155184 | 0,00040139 |
| Filamin, beta                                                                 | <i>Flnb</i>                     | 1,50154266 | 0,00090981 |
| Regulator of microtubule dynamics 3                                           | <i>Rmdn3</i>                    | 1,49957297 | 0,00123057 |
| Speckle-type poz protein                                                      | <i>Spop</i>                     | 1,49821068 | 0,00042042 |
| Phosphatidylinositol 3 kinase, regulatory subunit, polypeptide 4, p150        | <i>Pik3r4</i>                   | 1,49820798 | 0,0015981  |
| Ubiquitin specific peptidase 20                                               | <i>Usp20</i>                    | 1,49797417 | 0,00278018 |
| Developmental pluripotency associated 2                                       | <i>Dppa2</i>                    | 1,49783961 | 0,00279318 |
| Sorting nexin 1                                                               | <i>Snx1</i>                     | 1,49780667 | 9,10e-05   |
| Nfkb inhibitor interacting ras-like protein 1                                 | <i>Nkiras1</i>                  | 1,49708983 | 0,0011378  |
| Acetyl-coenzyme a acyltransferase 1a /// acetyl-coenzyme a acyltransferase 1b | <i>Acaa1a</i> /// <i>acaa1b</i> | 1,49628798 | 0,00140911 |
| Wd repeat and fyve domain containing 1                                        | <i>Wdfy1</i>                    | 1,49612829 | 0,00051108 |
| Prion protein                                                                 | <i>Prnp</i>                     | 1,49606978 | 0,0001168  |
| Protein phosphatase 6, catalytic subunit                                      | <i>Ppp6c</i>                    | 1,49574682 | 0,00404118 |
| Glucosamine-6-phosphate deaminase 2                                           | <i>Gnpda2</i>                   | 1,49564154 | 0,00030071 |
| Sodium channel, voltage-gated, type v, alpha                                  | <i>Scn5a</i>                    | 1,49555156 | 0,00103659 |
| Adenosine monophosphate deaminase 3                                           | <i>Ampd3</i>                    | 1,49540704 | 0,00030492 |
| Nuclear transcription factor, x-box binding 1                                 | <i>Nfx1</i>                     | 1,4951037  | 0,00377901 |
| Transmembrane protein 173                                                     | <i>Tmem173</i>                  | 1,49468758 | 0,00317001 |
| Zinc finger protein 605                                                       | <i>Zfp605</i>                   | 1,49461044 | 0,00404319 |
| Lepreca 1                                                                     | <i>Lepre1</i>                   | 1,49421104 | 8,49e-05   |
| Histocompatibility 2, m region locus 9                                        | <i>H2-m9</i>                    | 1,49389536 | 0,00042063 |
| Zinc finger protein 932                                                       | <i>Zfp932</i>                   | 1,49369617 | 0,00041346 |
| Magnesium-dependent phosphatase 1                                             | <i>Mdp1</i>                     | 1,49361048 | 0,00048071 |
| Diacylglycerol kinase zeta                                                    | <i>Dgkz</i>                     | 1,49338923 | 0,00178926 |
| Autophagy related 13                                                          | <i>Atg13</i>                    | 1,49310841 | 0,00159179 |
| Nuclear receptor interacting protein 1                                        | <i>Nrip1</i>                    | 1,4930513  | 0,00014319 |
| Notchless homolog 1 (drosophila)                                              | <i>Nle1</i>                     | 1,49286454 | 0,00463611 |
| Zinc finger, mym-type 5                                                       | <i>Zmym5</i>                    | 1,49274891 | 0,00025171 |
| Riken cDNA 2410016o06 gene                                                    | <i>2410016o06rik</i>            | 1,49216662 | 7,64e-05   |
| B9 protein domain 1                                                           | <i>B9d1</i>                     | 1,49214361 | 0,00068275 |

|                                                                                                                                                |                         |            |            |
|------------------------------------------------------------------------------------------------------------------------------------------------|-------------------------|------------|------------|
| Nadh dehydrogenase (ubiquinone) 1 beta subcomplex 3                                                                                            | <i>Ndufb3</i>           | 1,49208688 | 0,00021293 |
| Microtubule-associated protein 1 light chain 3 beta                                                                                            | <i>Map1lc3b</i>         | 1,49132483 | 0,00030297 |
| Oxidase assembly 1-like                                                                                                                        | <i>Oxa1l</i>            | 1,49109326 | 0,00157098 |
| Hypoxanthine guanine phosphoribosyl transferase                                                                                                | <i>Hprt</i>             | 1,49056398 | 0,0004345  |
| Caspase 4, apoptosis-related cysteine peptidase                                                                                                | <i>Casp4</i>            | 1,49015312 | 0,00035798 |
| Xeroderma pigmentosum, complementation group a                                                                                                 | <i>Xpa</i>              | 1,48905546 | 0,00515466 |
| Uridine monophosphate synthetase                                                                                                               | <i>Umps</i>             | 1,48873308 | 0,00017064 |
| Dynamin 1-like                                                                                                                                 | <i>Dnm1l</i>            | 1,48849828 | 0,00012314 |
| Seven in absentia 1a                                                                                                                           | <i>Siah1a</i>           | 1,48842233 | 0,00056426 |
| Rhomboid, veinlet-like 3 (drosophila)                                                                                                          | <i>Rhbdl3</i>           | 1,48779536 | 0,00194837 |
| Solute carrier family 39 (metal ion transporter), member 11                                                                                    | <i>Slc39a11</i>         | 1,48721444 | 0,00018563 |
| Glycolipid transfer protein domain containing 1                                                                                                | <i>Gltpd1</i>           | 1,48720144 | 0,00042556 |
| Selenophosphate synthetase 2                                                                                                                   | <i>Sephs2</i>           | 1,48675186 | 0,00011765 |
| Mus musculus 8 days embryo whole body cdna, riken full-length enriched library, clone:5730407p16 product:unclassifiable, full insert sequence. | <i>Ak077428</i>         | 1,48673407 | 0,00097806 |
| Bcl2-like 11 (apoptosis facilitator)                                                                                                           | <i>Bcl2l11</i>          | 1,48608499 | 0,00022539 |
| Rho guanine nucleotide exchange factor (gef) 3                                                                                                 | <i>Arhgef3</i>          | 1,48555402 | 0,00171562 |
| Macrophage scavenger receptor 1                                                                                                                | <i>Msr1</i>             | 1,48550181 | 0,00368974 |
| Cystathionine beta-synthase                                                                                                                    | <i>Cbs</i>              | 1,48542217 | 0,00093994 |
| Eukaryotic translation initiation factor 3, subunit a                                                                                          | <i>Eif3a</i>            | 1,48536549 | 0,00590597 |
| Suppressor of ikbke 1                                                                                                                          | <i>Sike1</i>            | 1,48522647 | 0,00048315 |
| Branched chain ketoacid dehydrogenase e1, alpha polypeptide                                                                                    | <i>Bckdha</i>           | 1,48503426 | 0,00151449 |
| Expressed sequence c78339                                                                                                                      | <i>C78339</i>           | 1,48503315 | 6,22e-05   |
| Hermansky-pudlak syndrome 4 homolog (human)                                                                                                    | <i>Hps4</i>             | 1,48471623 | 0,00064255 |
| Glycerophosphodiester phosphodiesterase 1                                                                                                      | <i>Gde1</i>             | 1,48401059 | 7,34e-05   |
| Ligand dependent nuclear receptor corepressor-like                                                                                             | <i>Lcorl</i>            | 1,48381712 | 0,00149755 |
| Muscleblind-like 1 (drosophila)                                                                                                                | <i>Mbnl1</i>            | 1,48379254 | 5,84e-05   |
| Retinitis pigmentosa 9 (human)                                                                                                                 | <i>Rp9</i>              | 1,48361683 | 0,00019889 |
| Predicted pseudogene 8069 /// translocase of outer mitochondrial membrane 5 homolog (yeast)                                                    | <i>Gm8069 /// tomm5</i> | 1,48354705 | 0,00014138 |
| Tubulin-specific chaperone c                                                                                                                   | <i>Tbcc</i>             | 1,48199265 | 0,00017918 |
| Coiled-coil domain containing 84                                                                                                               | <i>Ccdc84</i>           | 1,48185849 | 0,0031789  |
| Interferon induced transmembrane protein 6                                                                                                     | <i>Ifitm6</i>           | 1,48149545 | 0,00153057 |
| Solute carrier family 39 (metal ion transporter),                                                                                              | <i>Slc39a13</i>         | 1,48138412 | 0,00071181 |

|                                                                                   |                           |            |            |
|-----------------------------------------------------------------------------------|---------------------------|------------|------------|
| member 13                                                                         |                           |            |            |
| Mucolipin 1                                                                       | <i>Mcoln1</i>             | 1,48122812 | 0,00021706 |
| Acyl-coenzyme a dehydrogenase family, member 8                                    | <i>Acad8</i>              | 1,48096417 | 0,00147084 |
| Ring finger protein 141                                                           | <i>Rnf141</i>             | 1,48069075 | 0,00142643 |
| Caax box 1a /// caax box 1b                                                       | <i>Cxx1a /// cxx1b</i>    | 1,47965779 | 0,00657537 |
| Cyclin d-type binding-protein 1                                                   | <i>Ccndbp1</i>            | 1,47906656 | 0,00037068 |
| Growth arrest and dna-damage-inducible, gamma interacting protein 1               | <i>Gadd45gip1</i>         | 1,4789371  | 0,00112702 |
| Polymerase (rna) iii (dna directed) polypeptide f                                 | <i>Polr3f</i>             | 1,47872662 | 0,00746014 |
| Suppressor of ty 5                                                                | <i>Supt5</i>              | 1,47868367 | 0,00023792 |
| Rab3 gtpase activating protein subunit 2                                          | <i>Rab3gap2</i>           | 1,47825995 | 0,00235134 |
| Atpase, ca++ transporting, type 2c, member 2                                      | <i>Atp2c2</i>             | 1,47785494 | 0,00917625 |
| Adaptor protein complex ap-1, gamma 2 subunit                                     | <i>Ap1g2</i>              | 1,47761675 | 0,00037417 |
| Melanoma inhibitory activity 3                                                    | <i>Mia3</i>               | 1,47688971 | 0,00083941 |
| Protein tyrosine phosphatase, non-receptor type 21                                | <i>Ptpn21</i>             | 1,47676448 | 0,00402692 |
| Glis family zinc finger 2                                                         | <i>Glis2</i>              | 1,47669929 | 0,00014982 |
| P21 protein (cdc42/rac)-activated kinase 2                                        | <i>Pak2</i>               | 1,47612656 | 0,00503722 |
| Breast carcinoma amplified sequence 2                                             | <i>Bcas2</i>              | 1,47560375 | 0,00073102 |
| Coiled-coil-helix-coiled-coil-helix domain containing 6                           | <i>Chchd6</i>             | 1,47545941 | 0,00236693 |
| Rho gtpase activating protein 29                                                  | <i>Arhgap29</i>           | 1,47543984 | 0,00515711 |
| Rab, member ras oncogene family-like 3                                            | <i>Rabl3</i>              | 1,4752037  | 0,00082538 |
| Ubiquinol cytochrome c reductase core protein 2                                   | <i>Uqcrc2</i>             | 1,47493837 | 0,00020335 |
| Udp-gal:betagal beta 1,3-galactosyltransferase, polypeptide 6                     | <i>B3galt6</i>            | 1,47483072 | 0,00204334 |
| Kinesin family member 3a                                                          | <i>Kif3a</i>              | 1,47474676 | 0,00026186 |
| Mucolipin 3                                                                       | <i>Mcoln3</i>             | 1,47448618 | 0,00297093 |
| Gtp binding protein 4                                                             | <i>Gtpbp4</i>             | 1,47435224 | 0,00070305 |
| Mitochondrial amidoxime reducing component 2                                      | <i>Iii.02</i>             | 1,47430975 | 6,22e-05   |
| Fumarylacetoacetate hydrolase domain containing 1                                 | <i>Fahd1</i>              | 1,47414654 | 0,00044372 |
| Stt3, subunit of the oligosaccharyltransferase complex, homolog b (s. Cerevisiae) | <i>Stt3b</i>              | 1,47413443 | 0,00011034 |
| Nitrilase family, member 2                                                        | <i>Nit2</i>               | 1,47357375 | 0,00042702 |
| Riken cdna 3830406c13 gene                                                        | <i>3830406c13rik</i>      | 1,47320234 | 0,00019419 |
| Tubulin, alpha 8                                                                  | <i>Tuba8</i>              | 1,47308583 | 0,00164292 |
| Predicted gene 12942 /// zinc finger, mym-type 6                                  | <i>Gm12942 /// zymym6</i> | 1,47307356 | 0,00099971 |
| Surfeit gene 6                                                                    | <i>Surf6</i>              | 1,47283601 | 0,00065445 |
| Er membrane protein complex subunit 9                                             | <i>Emc9</i>               | 1,47239602 | 0,00068735 |

|                                                                                  |                                 |            |            |
|----------------------------------------------------------------------------------|---------------------------------|------------|------------|
| Origin recognition complex, subunit 4                                            | <i>Orc4</i>                     | 1,47217369 | 0,00705718 |
| Zinc finger and btb domain containing 3                                          | <i>Zbtb3</i>                    | 1,47206187 | 0,00232066 |
| Zinc finger, zz domain containing 3                                              | <i>Zzz3</i>                     | 1,47203055 | 0,00199665 |
| Exosome component 5                                                              | <i>Exosc5</i>                   | 1,47167506 | 0,00057618 |
| Tuberous sclerosis 1                                                             | <i>Tsc1</i>                     | 1,47112859 | 0,00012226 |
| Phosphatidylinositol glycan anchor biosynthesis, class t                         | <i>Pigt</i>                     | 1,47095916 | 0,00304291 |
| Sphingomyelin phosphodiesterase, acid-like 3a                                    | <i>Smpdl3a</i>                  | 1,47050842 | 0,00067708 |
| Rev1 homolog (s. Cerevisiae)                                                     | <i>Rev1</i>                     | 1,47035224 | 0,00253485 |
| Mitotic spindle organizing protein 2                                             | <i>Mzt2</i>                     | 1,46947407 | 0,00031784 |
| Zinc finger protein 120                                                          | <i>Zfp120</i>                   | 1,4694362  | 0,00712289 |
| Lactamase, beta 2                                                                | <i>Lactb2</i>                   | 1,46931251 | 0,00020242 |
| Transmembrane protein 147                                                        | <i>Tmem147</i>                  | 1,46913522 | 0,00021646 |
| Zinc finger protein 94                                                           | <i>Zfp94</i>                    | 1,46900327 | 0,00477749 |
| Clustered mitochondria (clua/clu1) homolog                                       | <i>Cluh</i>                     | 1,46888305 | 0,00022516 |
| F-box protein 6                                                                  | <i>Fbxo6</i>                    | 1,46878093 | 0,00016604 |
| Ubiquitin protein ligase e3 component n-recogin 3                                | <i>Ubr3</i>                     | 1,46872992 | 0,00831731 |
| Ceramide synthase 2                                                              | <i>Cers2</i>                    | 1,46833838 | 7,92e-05   |
| Protein tyrosine phosphatase, receptor type, n                                   | <i>Ptpn</i>                     | 1,46823992 | 0,0047043  |
| Dehydrogenase/reductase (sdr family) member 11                                   | <i>Dhrs11</i>                   | 1,46801956 | 0,00548837 |
| Wd repeat domain 81                                                              | <i>Wdr81</i>                    | 1,46762517 | 0,00204672 |
| Expressed sequence aa408650                                                      | <i>Aa408650</i>                 | 1,46757679 | 0,00058706 |
| Peroxiredoxin 3                                                                  | <i>Prdx3</i>                    | 1,46728387 | 0,0002812  |
| Dnaj (hsp40) homolog, subfamily a, member 1                                      | <i>Dnaja1</i>                   | 1,46690011 | 0,00260485 |
| Tripeptidyl peptidase ii                                                         | <i>Tpp2</i>                     | 1,46643798 | 0,0016196  |
| Aldo-keto reductase family 1, member b3 (aldose reductase) /// akr1b3 pseudogene | <i>Akr1b3</i> /// <i>gm6644</i> | 1,46641127 | 0,00014092 |
| Zinc finger protein 131                                                          | <i>Zfp131</i>                   | 1,4659758  | 0,00131054 |
| Nadh dehydrogenase (ubiquinone) 1 alpha subcomplex, assembly factor 3            | <i>Ndufaf3</i>                  | 1,46560109 | 0,00040356 |
| Regulatory factor x, 5 (influences hla class ii expression)                      | <i>Rfx5</i>                     | 1,46520024 | 0,0003624  |
| Golgi apparatus protein 1                                                        | <i>Glg1</i>                     | 1,4651609  | 0,00112044 |
| Syntaxin 8                                                                       | <i>Stx8</i>                     | 1,46436742 | 0,00041339 |
| Transcription factor b1, mitochondrial                                           | <i>Tfb1m</i>                    | 1,46392954 | 0,00746919 |
| Transmembrane protein 189                                                        | <i>Tmem189</i>                  | 1,46392866 | 0,00025533 |
| Vasodilator-stimulated phosphoprotein                                            | <i>Vasp</i>                     | 1,46385754 | 0,00071427 |
| Immediate early response 5                                                       | <i>Ier5</i>                     | 1,46363097 | 0,00780667 |

|                                                                |                 |            |            |
|----------------------------------------------------------------|-----------------|------------|------------|
| Myb binding protein (p160) 1a                                  | <i>Mybbp1a</i>  | 1,46250522 | 0,00187457 |
| Bcl2/adenovirus e1b interacting protein 3                      | <i>Bnip3</i>    | 1,46184574 | 0,00028887 |
| Cdk2-associated protein 2                                      | <i>Cdk2ap2</i>  | 1,46182746 | 0,0003064  |
| G protein-coupled receptor kinase 4                            | <i>Grk4</i>     | 1,46175848 | 0,00237486 |
| Splicing regulatory glutamine/lysine-rich protein 1            | <i>Srek1ip1</i> | 1,46159494 | 0,00117866 |
| Deah (asp-glu-ala-his) box polypeptide 8                       | <i>Dhx8</i>     | 1,46136919 | 0,00021947 |
| Adipogenesis associated mth938 domain containing               | <i>Aamd</i>     | 1,46096083 | 0,00031474 |
| Aarf domain containing kinase 3                                | <i>Adck3</i>    | 1,4607637  | 0,00831481 |
| Potassium voltage-gated channel, shal-related family, member 2 | <i>Kcnd2</i>    | 1,4606275  | 0,00052169 |
| Cell death inducing trp53 target 1                             | <i>Cdip1</i>    | 1,46042033 | 0,00091723 |
| Leucine zipper transcription factor-like 1                     | <i>Lztfl1</i>   | 1,46022661 | 0,00255489 |
| Nop14 nucleolar protein                                        | <i>Nop14</i>    | 1,45908417 | 0,00062058 |
| Myc induced nuclear antigen                                    | <i>Mina</i>     | 1,45904638 | 0,0026253  |
| Neurolysin (metallopeptidase m3 family)                        | <i>Nln</i>      | 1,45832409 | 0,00046182 |
| Synaptotagmin binding, cytoplasmic rna interacting protein     | <i>Syncrip</i>  | 1,45802507 | 0,00385776 |
| Interleukin 7                                                  | <i>Il7</i>      | 1,45771183 | 0,00470153 |
| Upstream binding protein 1                                     | <i>Ubp1</i>     | 1,45725535 | 0,00089508 |
| Ubiquitin-like 3                                               | <i>Ubl3</i>     | 1,45722177 | 0,00012082 |
| Ataxia telangiectasia and rad3 related                         | <i>Atr</i>      | 1,45716319 | 0,00029173 |
| Family with sequence similarity 69, member b                   | <i>Fam69b</i>   | 1,45683088 | 0,00061076 |
| Niemann-pick type c2                                           | <i>Npc2</i>     | 1,45681308 | 0,0008714  |
| Centrin 2                                                      | <i>Cetn2</i>    | 1,45667734 | 0,0004848  |
| Glutamate-ammonia ligase (glutamine synthetase)                | <i>Glul</i>     | 1,45656929 | 0,0039432  |
| Reticulon 4 interacting protein 1                              | <i>Rtn4ip1</i>  | 1,45630981 | 0,00496079 |
| Cellular retinoic acid binding protein ii                      | <i>Crabp2</i>   | 1,45594334 | 0,00010987 |
| Cytochrome c oxidase subunit vb                                | <i>Cox5b</i>    | 1,45526143 | 0,00033754 |
| Ribonuclease l (2', 5'-oligoadenylate synthetase-dependent)    | <i>Rnasel</i>   | 1,45474782 | 0,00603405 |
| Arginyl aminopeptidase (aminopeptidase b)-like 1               | <i>Rnpepl1</i>  | 1,45458294 | 0,00056935 |
| Protein kinase inhibitor, gamma                                | <i>Pkig</i>     | 1,45393043 | 0,00279606 |
| Abhydrolase domain containing 17c                              | <i>Abhd17c</i>  | 1,45371074 | 0,00015341 |
| Copper chaperone for superoxide dismutase                      | <i>Ccs</i>      | 1,45363372 | 0,00019306 |
| Poly(a) binding protein, nuclear 1                             | <i>Pabpn1</i>   | 1,45166029 | 0,00963445 |
| Udp-glnac:betagal beta-1,3-n-acetylglucosaminyltransferase 9   | <i>B3gnt9</i>   | 1,45139625 | 0,00429808 |

|                                                                            |                  |            |            |
|----------------------------------------------------------------------------|------------------|------------|------------|
| Helicase with zinc finger 2, transcriptional coactivator                   | <i>Helz2</i>     | 1,45107065 | 0,00646695 |
| Tafazzin                                                                   | <i>Taz</i>       | 1,45094688 | 0,00029303 |
| Nitrilase 1                                                                | <i>Nit1</i>      | 1,4499046  | 0,00114474 |
| Coiled-coil domain containing 93                                           | <i>Ccdc93</i>    | 1,44988773 | 0,0003813  |
| Advillin                                                                   | <i>Avil</i>      | 1,44971498 | 0,00299983 |
| Sorting nexin 5                                                            | <i>Snx5</i>      | 1,44970198 | 0,00021192 |
| Syntaxin 3                                                                 | <i>Stx3</i>      | 1,44914069 | 0,0031957  |
| B cell leukemia/lymphoma 10                                                | <i>Bcl10</i>     | 1,44894666 | 0,00032784 |
| Protein kinase c substrate 80k-h                                           | <i>Prkcsb</i>    | 1,44829913 | 0,00041622 |
| Mitochondrial ribosomal protein s12                                        | <i>Mrps12</i>    | 1,44807013 | 0,00015141 |
| Kdel (lys-asp-glu-leu) containing 1                                        | <i>Kdelc1</i>    | 1,44786378 | 0,00031143 |
| Proline-rich polypeptide 3                                                 | <i>Prr3</i>      | 1,44775494 | 0,0048668  |
| Nop58 ribonucleoprotein                                                    | <i>Nop58</i>     | 1,44755306 | 0,00061185 |
| Multiple coagulation factor deficiency 2                                   | <i>Mcfd2</i>     | 1,44724004 | 0,00129907 |
| Methionyl aminopeptidase 1                                                 | <i>Metap1</i>    | 1,44675787 | 0,00358613 |
| Septin 8                                                                   | <i>Ix.08</i>     | 1,44635788 | 0,00053885 |
| Tousled-like kinase 2 (arabidopsis)                                        | <i>Tlk2</i>      | 1,44616369 | 0,00099756 |
| Acyl-coenzyme a dehydrogenase family, member 9                             | <i>Acad9</i>     | 1,44616167 | 0,00622774 |
| Expressed sequence ai597479                                                | <i>Ai597479</i>  | 1,44598848 | 0,00071604 |
| Hexosaminidase (glycosyl hydrolase family 20, catalytic domain) containing | <i>Hexdc</i>     | 1,44590496 | 0,0004183  |
| Ubiquitin specific peptidase 8                                             | <i>Usp8</i>      | 1,44576757 | 0,00053085 |
| Adenylate cyclase 9                                                        | <i>Adcy9</i>     | 1,44526753 | 0,00564885 |
| Trna methyltransferase 1 like                                              | <i>Trmt1l</i>    | 1,44515793 | 0,00165666 |
| Golgi autoantigen, golgin subfamily a, 4                                   | <i>Golga4</i>    | 1,44439908 | 0,00495329 |
| Immunoglobulin (cd79a) binding protein 1                                   | <i>Igbp1</i>     | 1,44312345 | 0,00032912 |
| Ninjurin 1                                                                 | <i>Ninj1</i>     | 1,44310814 | 0,0010901  |
| Adiponectin receptor 1                                                     | <i>Adipor1</i>   | 1,44283297 | 0,0020248  |
| Atp-binding cassette, sub-family c (cftr/mrp), member 1                    | <i>Abcc1</i>     | 1,44279027 | 0,00045622 |
| Erythrocyte protein band 4.1-like 4a                                       | <i>Epb4.1l4a</i> | 1,44271925 | 0,00071567 |
| Glutamate-cysteine ligase, catalytic subunit                               | <i>Gclc</i>      | 1,44252159 | 0,00138529 |
| Late endosomal/lysosomal adaptor, mapk and mtor activator 2                | <i>Lamtor2</i>   | 1,44220395 | 0,00036264 |
| Predicted gene 13152                                                       | <i>Gm13152</i>   | 1,44220221 | 0,00198154 |
| Vesicle-associated membrane protein, associated protein b and c            | <i>Vapb</i>      | 1,44124719 | 0,00093881 |



|                                                                   |                           |            |            |
|-------------------------------------------------------------------|---------------------------|------------|------------|
| Ubiquitin specific peptidase 14                                   | <i>Usp14</i>              | 1,44124185 | 0,0002518  |
| Magnesium transporter 1                                           | <i>Magt1</i>              | 1,44119722 | 0,0079557  |
| Nucleoporin 62                                                    | <i>Nup62</i>              | 1,44102372 | 0,00023221 |
| Metaxin 1                                                         | <i>Mtx1</i>               | 1,44091427 | 0,00178998 |
| Dual specificity phosphatase 8                                    | <i>Dusp8</i>              | 1,44091138 | 0,00111299 |
| Proteasome (prosome, macropain) 26s subunit, non-atpase, 8        | <i>Psm8</i>               | 1,44087797 | 0,00154224 |
| Fos-like antigen 2                                                | <i>Fosl2</i>              | 1,44035769 | 0,00801247 |
| Aspartyl-trna synthetase                                          | <i>Dars</i>               | 1,43980843 | 0,00151174 |
| Set nuclear oncogene                                              | <i>Set</i>                | 1,43974981 | 0,00010356 |
| Mitogen-activated protein kinase 9                                | <i>Mapk9</i>              | 1,4395704  | 0,00041946 |
| Dnaj (hsp40) homolog, subfamily a, member 3                       | <i>Dnaja3</i>             | 1,43946856 | 0,00016843 |
| Isocitrate dehydrogenase 3 (nad+) alpha                           | <i>Idh3a</i>              | 1,43899171 | 0,00233842 |
| Ubiquitin-conjugating enzyme e2a                                  | <i>Ube2a</i>              | 1,43893159 | 0,00375543 |
| Mitochondrial ribosomal protein l40                               | <i>Mrpl40</i>             | 1,43891782 | 0,00052928 |
| Riken cDNA 0610010b08 gene /// predicted gene 14308               | <i>0610010b08rik ///</i>  | 1,43861123 | 0,00082984 |
| /// predicted gene 14325 /// predicted gene 14326 ///             | <i>gm14308 ///</i>        |            |            |
| predicted gene 14430 /// predicted gene 14432 ///                 | <i>gm14325 ///</i>        |            |            |
| predicted gene 14434 /// predicted gene 4724 ///                  | <i>gm14326 ///</i>        |            |            |
| predicted gene 6710 /// zinc finger protein 91-like ///           | <i>gm14430 ///</i>        |            |            |
| zinc finger protein 709-like                                      | <i>gm14432 ///</i>        |            |            |
|                                                                   | <i>gm14434 /// gm4724</i> |            |            |
|                                                                   | <i>/// gm6710 ///</i>     |            |            |
|                                                                   | <i>loc102639412 ///</i>   |            |            |
|                                                                   | <i>loc628147</i>          |            |            |
| Tsc22 domain family, member 1                                     | <i>Tsc22d1</i>            | 1,43799294 | 0,0001559  |
| Platelet-activating factor acetylhydrolase, isoform 1b, subunit 2 | <i>Pafah1b2</i>           | 1,43789438 | 0,00051163 |
| Mesenteric estrogen dependent adipogenesis                        | <i>Medag</i>              | 1,43778962 | 0,00265689 |
| Cdk2 associated, cullin domain 1                                  | <i>Cacul1</i>             | 1,43774123 | 0,00191698 |
| Dolichol kinase                                                   | <i>Dolk</i>               | 1,43736786 | 0,00012289 |
| Ubiquitin specific peptidase 47                                   | <i>Usp47</i>              | 1,43735559 | 0,00023733 |
| Ankyrin repeat and socs box-containing 8                          | <i>Asb8</i>               | 1,43711383 | 0,00070341 |
| Mitochondrial ribosomal protein s17                               | <i>Mrps17</i>             | 1,43708526 | 9,17e-05   |
| Mitochondrial pyruvate carrier 2                                  | <i>Mpc2</i>               | 1,43691862 | 0,00043395 |
| Trans-golgi network protein /// trans-golgi network protein 2     | <i>Tgoln1 /// tgoln2</i>  | 1,43686235 | 0,00015182 |
| Solute carrier family 30 (zinc transporter), member 1             | <i>Slc30a1</i>            | 1,43685059 | 0,00050296 |

|                                                                                                |                      |            |            |
|------------------------------------------------------------------------------------------------|----------------------|------------|------------|
| St3 beta-galactoside alpha-2,3-sialyltransferase 2                                             | <i>St3gal2</i>       | 1,43654253 | 0,00451346 |
| Neuroblastoma, suppression of tumorigenicity 1                                                 | <i>Nbl1</i>          | 1,43594025 | 0,00342007 |
| Myosin vi                                                                                      | <i>Myo6</i>          | 1,4349729  | 0,0042027  |
| Dead (asp-glu-ala-asp) box polypeptide 52                                                      | <i>Ddx52</i>         | 1,43495489 | 0,00059594 |
| A kinase (prka) anchor protein 1                                                               | <i>Akap1</i>         | 1,43491116 | 0,00039599 |
| Riken cdna 1810030o07 gene                                                                     | <i>1810030o07rik</i> | 1,43486966 | 0,00026705 |
| Alpha thalassemia/mental retardation syndrome x-linked homolog (human)                         | <i>Atrx</i>          | 1,43455258 | 0,00959363 |
| Pyruvate dehydrogenase kinase, isoenzyme 1                                                     | <i>Pdk1</i>          | 1,43414771 | 0,00099402 |
| Protein s (alpha)                                                                              | <i>Pros1</i>         | 1,43377886 | 0,00051865 |
| Cub domain containing protein 1                                                                | <i>Cdcp1</i>         | 1,43350899 | 0,00053365 |
| Spastic paraplegia 20, spartin (troyer syndrome) homolog (human)                               | <i>Spg20</i>         | 1,43237068 | 0,0007671  |
| Major facilitator superfamily domain containing 5                                              | <i>Mfsd5</i>         | 1,43218357 | 0,00015703 |
| Phosphatidylinositol glycan anchor biosynthesis, class x                                       | <i>Pigx</i>          | 1,43183009 | 0,00160843 |
| Isocitrate dehydrogenase 3 (nad+), gamma                                                       | <i>Idh3g</i>         | 1,43181476 | 0,00012289 |
| Solute carrier family 39 (zinc transporter), member 7                                          | <i>Slc39a7</i>       | 1,43163781 | 0,00017663 |
| Phosphodiesterase 12                                                                           | <i>Pde12</i>         | 1,4315164  | 0,00388956 |
| Eukaryotic translation termination factor 1                                                    | <i>Etf1</i>          | 1,43142289 | 0,00082966 |
| Homocysteine-inducible, endoplasmic reticulum stress-inducible, ubiquitin-like domain member 1 | <i>Herpud1</i>       | 1,43122444 | 0,00185486 |
| Mitochondrial ribosomal protein l16                                                            | <i>Mrpl16</i>        | 1,43118449 | 0,0001712  |
| Mitochondrial ribosomal protein s31                                                            | <i>Mrps31</i>        | 1,43101125 | 0,0005881  |
| Glucose-fructose oxidoreductase domain containing 2                                            | <i>Gfod2</i>         | 1,43061048 | 0,00015239 |
| Bone morphogenetic protein receptor, type 1b                                                   | <i>Bmpr1b</i>        | 1,42989792 | 0,00755455 |
| Williams beuren syndrome chromosome region 27 (human)                                          | <i>Wbscr27</i>       | 1,42976895 | 0,00018799 |
| Proteasome (prosome, macropain) subunit, beta type 8 (large multifunctional peptidase 7)       | <i>Psmb8</i>         | 1,42965463 | 0,00401785 |
| Peptidyl-trna hydrolase 1 homolog (s. Cerevisiae)                                              | <i>Ptrh1</i>         | 1,42944556 | 0,00024452 |
| Denn/madd domain containing 1a                                                                 | <i>Dennd1a</i>       | 1,42914834 | 0,0006499  |
| Ring finger protein 138                                                                        | <i>Rnf138</i>        | 1,42909948 | 0,00548634 |
| Er membrane protein complex subunit 4                                                          | <i>Emc4</i>          | 1,42872003 | 0,00336687 |
| Ae binding protein 1                                                                           | <i>Aebp1</i>         | 1,42870945 | 0,00218402 |
| Acyl-coa thioesterase 13                                                                       | <i>Acot13</i>        | 1,42838474 | 0,0019336  |
| Expressed sequence au020206                                                                    | <i>Au020206</i>      | 1,42837811 | 0,00047172 |

|                                                                         |                      |            |            |
|-------------------------------------------------------------------------|----------------------|------------|------------|
| Mitochondrial ribosomal protein s30                                     | <i>Mrps30</i>        | 1,42812699 | 0,00044466 |
| Rna binding motif protein 15b                                           | <i>Rbm15b</i>        | 1,42811595 | 0,00204348 |
| Nima (never in mitosis gene a)-related expressed kinase 4               | <i>Nek4</i>          | 1,42810152 | 0,00243301 |
| Solute carrier family 5, member 4a                                      | <i>Slc5a4a</i>       | 1,4279135  | 0,00127089 |
| F-box and leucine-rich repeat protein 12                                | <i>Fbxl12</i>        | 1,42758038 | 0,00353199 |
| Nadh dehydrogenase (ubiquinone) fe-s protein 3                          | <i>Ndufs3</i>        | 1,4271308  | 0,0007931  |
| Endoplasmic reticulum-golgi intermediate compartment (ergic) 1          | <i>Ergic1</i>        | 1,42664041 | 0,00021081 |
| Er membrane protein complex subunit 6                                   | <i>Emc6</i>          | 1,42642826 | 0,00043944 |
| Ntf2-related export protein 1                                           | <i>Nxt1</i>          | 1,42604352 | 0,00025182 |
| Nudix (nucleoside diphosphate linked moiety x)-type motif 16-like 1     | <i>Nudt16l1</i>      | 1,42585066 | 0,00964137 |
| Heat shock 105kda/110kda protein 1                                      | <i>Hsph1</i>         | 1,42582666 | 0,00126531 |
| Asparagine-linked glycosylation 14                                      | <i>Alg14</i>         | 1,42558497 | 0,00493237 |
| Cyclin t2                                                               | <i>Ccnt2</i>         | 1,42515538 | 0,00574236 |
| Calcium binding protein 39                                              | <i>Cab39</i>         | 1,42495748 | 0,00018424 |
| Ubiquinol-cytochrome c reductase core protein 1                         | <i>Uqcrc1</i>        | 1,42480507 | 0,00057898 |
| Riken cDNA 1600012h06 gene                                              | <i>1600012h06rik</i> | 1,42476867 | 0,00114882 |
| V-crk sarcoma virus ct10 oncogene homolog (avian)-like                  | <i>Crkl</i>          | 1,42448218 | 0,00024056 |
| Zinc finger ccch-type containing 15                                     | <i>Zc3h15</i>        | 1,42377247 | 0,00146186 |
| Dna segment, chr 19, brigham & women's genetics 1357 expressed          | <i>D19bwg1357e</i>   | 1,42371166 | 0,00232006 |
| Mitogen-activated protein kinase kinase 4                               | <i>Map2k4</i>        | 1,42365144 | 0,00079041 |
| Transducin (beta)-like 1 x-linked                                       | <i>Tbl1x</i>         | 1,42355507 | 0,00887273 |
| Ash1 (absent, small, or homeotic)-like (drosophila)                     | <i>Ash1l</i>         | 1,42354501 | 0,00076303 |
| Rogdi homolog (drosophila)                                              | <i>Rogdi</i>         | 1,42344726 | 0,00106139 |
| Translocase of inner mitochondrial membrane 10b                         | <i>Timm10b</i>       | 1,42334138 | 0,00085307 |
| Ubiquitin specific peptidase 19                                         | <i>Usp19</i>         | 1,42325711 | 0,00030614 |
| Differentially expressed in b16f10 1                                    | <i>Deb1</i>          | 1,42317249 | 0,00179834 |
| Heat shock protein 3                                                    | <i>Hspb3</i>         | 1,42286499 | 0,00068461 |
| Parkinson disease (autosomal recessive, early onset) 7                  | <i>Park7</i>         | 1,42275932 | 0,0008837  |
| Coiled-coil domain containing 186                                       | <i>Ccdc186</i>       | 1,42244777 | 0,00225756 |
| Mid1 interacting protein 1 (gastrulation specific g12-like (zebrafish)) | <i>Mid1ip1</i>       | 1,42171335 | 0,00766017 |
| Hook homolog 2 (drosophila)                                             | <i>Hook2</i>         | 1,42144059 | 0,00117245 |

|                                                                                               |                           |            |            |
|-----------------------------------------------------------------------------------------------|---------------------------|------------|------------|
| Stromal interaction molecule 1                                                                | <i>Stim1</i>              | 1,42142963 | 0,00125127 |
| Telo2 interacting protein 1                                                                   | <i>Tti1</i>               | 1,42110845 | 0,00285222 |
| Otu domain containing 7a                                                                      | <i>Otud7a</i>             | 1,42076437 | 0,00197293 |
| Septin 2                                                                                      | <i>Ix.02</i>              | 1,42063361 | 0,00380244 |
| Mitochondrial ribosomal protein s7                                                            | <i>Mrps7</i>              | 1,42030095 | 0,00035551 |
| Centrosomal protein 112                                                                       | <i>Cep112</i>             | 1,42017318 | 0,00112429 |
| V-crk sarcoma virus ct10 oncogene homolog (avian)                                             | <i>Crk</i>                | 1,41976171 | 0,00318924 |
| Adp-ribosylation factor related protein 1                                                     | <i>Arfrp1</i>             | 1,41946838 | 0,00184128 |
| Biogenesis of lysosomal organelles complex-1, subunit 6, pallidin                             | <i>Bloc1s6</i>            | 1,41944471 | 0,00055891 |
| Trna methyltransferase 10a                                                                    | <i>Trmt10a</i>            | 1,41922326 | 0,00109716 |
| Cytochrome p450, family 2, subfamily c, polypeptide 44                                        | <i>Cyp2c44</i>            | 1,4191071  | 0,00111778 |
| Maturin, neural progenitor differentiation regulator homolog (xenopus)                        | <i>Mturn</i>              | 1,41865214 | 0,00531082 |
| K(lysine) acetyltransferase 2a                                                                | <i>Kat2a</i>              | 1,41839233 | 0,00089571 |
| H2-k region expressed gene 6                                                                  | <i>H2-ke6</i>             | 1,41836245 | 0,00223882 |
| Mediator complex subunit 9                                                                    | <i>Med9</i>               | 1,41833288 | 0,00125243 |
| Coiled-coil domain containing 22 /// protein phosphatase 1, regulatory (inhibitor) subunit 3f | <i>Ccdc22 /// ppp1r3f</i> | 1,41800689 | 0,00060179 |
| Nitrogen fixation gene 1 (s. Cerevisiae)                                                      | <i>Nfs1</i>               | 1,4179614  | 0,00038282 |
| Expressed sequence au040320                                                                   | <i>Au040320</i>           | 1,41674886 | 0,00387651 |
| Cyclin k                                                                                      | <i>Ccnk</i>               | 1,4164429  | 0,00564071 |
| Tsr3 20s rna accumulation                                                                     | <i>Tsr3</i>               | 1,41622829 | 0,00169939 |
| Anthrax toxin receptor 1                                                                      | <i>Antxr1</i>             | 1,41608438 | 0,00280739 |
| Myosin, light polypeptide 1                                                                   | <i>Myl1</i>               | 1,41589458 | 0,00689224 |
| Inhibitor of cdk, cyclin a1 interacting protein 1                                             | <i>Inca1</i>              | 1,41576883 | 0,00364846 |
| Microtubule-associated protein 1 light chain 3 alpha                                          | <i>Map1lc3a</i>           | 1,41562436 | 0,00021188 |
| Cytochrome c oxidase assembly factor 6                                                        | <i>Coa6</i>               | 1,41520507 | 0,00125855 |
| Autophagy related 14                                                                          | <i>Atg14</i>              | 1,41511907 | 0,00965095 |
| Golgi snap receptor complex member 1                                                          | <i>Gosr1</i>              | 1,41503836 | 0,00017575 |
| Ddrgk domain containing 1                                                                     | <i>Ddrgk1</i>             | 1,41498338 | 0,00048979 |
| Phenylalanyl-trna synthetase, beta subunit                                                    | <i>Farsb</i>              | 1,41381535 | 0,00133921 |
| General transcription factor iif, polypeptide 2                                               | <i>Gtf2f2</i>             | 1,41344448 | 0,0039072  |
| Poly(a) binding protein interacting protein 2b                                                | <i>Paip2b</i>             | 1,41342911 | 0,00022947 |
| Yth domain containing 1                                                                       | <i>Ythdc1</i>             | 1,41327843 | 0,00050446 |
| Transforming, acidic coiled-coil containing protein 2                                         | <i>Tacc2</i>              | 1,41284331 | 0,00056989 |
| Prolactin family 7, subfamily a, member 2                                                     | <i>Prl7a2</i>             | 1,41204786 | 0,00136492 |

|                                                                                  |                           |            |            |
|----------------------------------------------------------------------------------|---------------------------|------------|------------|
| Thiamine triphosphatase                                                          | <i>Thtpa</i>              | 1,41203627 | 0,00031185 |
| A disintegrin and metallopeptidase domain 17                                     | <i>Adam17</i>             | 1,41178328 | 0,00324803 |
| Zinc finger protein 644                                                          | <i>Zfp644</i>             | 1,41176238 | 0,00711704 |
| Zinc finger rna binding protein                                                  | <i>Zfr</i>                | 1,41145647 | 0,00718133 |
| Hydroxyacyl-coenzyme a dehydrogenase                                             | <i>Hadh</i>               | 1,41144279 | 0,0003235  |
| Taf5-like rna polymerase ii, p300/cbp-associated factor (pcaf)-associated factor | <i>Taf5l</i>              | 1,41141578 | 0,00062964 |
| Smad family member 1                                                             | <i>Smad1</i>              | 1,41120226 | 0,00215395 |
| Family with sequence similarity 126, member b                                    | <i>Fam126b</i>            | 1,41106429 | 0,00690286 |
| Origin recognition complex, subunit 2                                            | <i>Orc2</i>               | 1,4107686  | 0,00016529 |
| Carbonyl reductase 1                                                             | <i>Cbr1</i>               | 1,41060719 | 0,00372023 |
| Mitogen-activated protein kinase kinase 1                                        | <i>Map2k1</i>             | 1,41057425 | 0,00043985 |
| Dead (asp-glu-ala-asp) box polypeptide 5                                         | <i>Ddx5</i>               | 1,41030915 | 0,00636647 |
| N-acetylneuraminic acid phosphatase                                              | <i>Nanp</i>               | 1,40952918 | 0,00121043 |
| Cysteinyl-trna synthetase                                                        | <i>Cars</i>               | 1,40872023 | 0,00070224 |
| Pantothenate kinase 1                                                            | <i>Pank1</i>              | 1,40862765 | 0,00506402 |
| Nucleolar protein interacting with the fha domain of mki67                       | <i>Nifk</i>               | 1,40856188 | 0,00118127 |
| Spindlin 1                                                                       | <i>Spin1</i>              | 1,4085218  | 0,00016008 |
| Arfgap with fg repeats 1                                                         | <i>Agfg1</i>              | 1,40848444 | 0,00071024 |
| Small integral membrane protein 12                                               | <i>Smim12</i>             | 1,40831135 | 0,00055043 |
| Lysine (k)-specific demethylase 5b                                               | <i>Kdm5b</i>              | 1,4081519  | 0,00323844 |
| Serine carboxypeptidase 1                                                        | <i>Scpep1</i>             | 1,40809196 | 0,00560058 |
| Mau2 chromatid cohesion factor homolog (c. Elegans)                              | <i>Mau2</i>               | 1,40773062 | 0,00256811 |
| Scavenger receptor class b, member 2                                             | <i>Scarb2</i>             | 1,40739651 | 0,00042425 |
| Predicted gene 10015 /// predicted gene 10145 ///                                | <i>Gm10015 ///</i>        | 1,4067822  | 0,00127089 |
| predicted gene 10705 /// predicted gene 5858 ///                                 | <i>gm10145 ///</i>        |            |            |
| ubiquitin-conjugating enzyme e2l 3                                               | <i>gm10705 /// gm5858</i> |            |            |
|                                                                                  | <i>/// ube2l3</i>         |            |            |
| Adenylosuccinate synthetase, non muscle                                          | <i>Adss</i>               | 1,40585982 | 0,00176696 |
| Dual specificity phosphatase 12                                                  | <i>Dusp12</i>             | 1,40560288 | 0,00049485 |
| Chromodomain helicase dna binding protein 6                                      | <i>Chd6</i>               | 1,40543631 | 0,00278018 |
| Acidic (leucine-rich) nuclear phosphoprotein 32 family, member a                 | <i>Anp32a</i>             | 1,40524449 | 0,00124546 |
| F-box protein 36                                                                 | <i>Fbxo36</i>             | 1,40499477 | 0,00032811 |
| Dual specificity phosphatase 7                                                   | <i>Dusp7</i>              | 1,40438803 | 0,00443919 |
| Cyclin-dependent kinase 2 interacting protein                                    | <i>Cinp</i>               | 1,40437553 | 0,00017135 |

|                                                                                                           |                                     |            |            |
|-----------------------------------------------------------------------------------------------------------|-------------------------------------|------------|------------|
| Sub1 homolog (s. Cerevisiae)                                                                              | <i>Sub1</i>                         | 1,40413531 | 0,00485167 |
| Transcriptional adaptor 2b                                                                                | <i>Tada2b</i>                       | 1,40390542 | 0,00204484 |
| Mediator complex subunit 8                                                                                | <i>Med8</i>                         | 1,4038172  | 0,00065939 |
| Mitogen-activated protein kinase binding protein 1                                                        | <i>Mapkbp1</i>                      | 1,4033377  | 0,00059321 |
| Inversin                                                                                                  | <i>Invs</i>                         | 1,40315639 | 0,00807889 |
| Brain protein i3                                                                                          | <i>Bri3</i>                         | 1,40259394 | 0,00179075 |
| Intercellular adhesion molecule 4, landsteiner-wiener blood group                                         | <i>Icam4</i>                        | 1,40244214 | 0,00199321 |
| Exosome component 7                                                                                       | <i>Exosc7</i>                       | 1,40226046 | 0,00124507 |
| Follistatin-like 1                                                                                        | <i>Fstl1</i>                        | 1,40217531 | 0,00025914 |
| Cytochrome c oxidase assembly protein 18                                                                  | <i>Cox18</i>                        | 1,40158317 | 0,00165304 |
| Interferon (alpha and beta) receptor 1                                                                    | <i>Ifnar1</i>                       | 1,40114188 | 0,00148473 |
| Carbonyl reductase 2                                                                                      | <i>Cbr2</i>                         | 1,40112621 | 0,00232323 |
| Zinc finger protein 40                                                                                    | <i>Zfp40</i>                        | 1,40090747 | 0,00869205 |
| Poly (adp-ribose) polymerase family, member 6                                                             | <i>Parp6</i>                        | 1,40075368 | 0,00292467 |
| Amyotrophic lateral sclerosis 2 (juvenile)                                                                | <i>Als2</i>                         | 1,4007504  | 0,00137532 |
| Acidic (leucine-rich) nuclear phosphoprotein 32 family, member b                                          | <i>Anp32b</i>                       | 1,400736   | 0,00014138 |
| ATPase, H <sup>+</sup> transporting, lysosomal v1 subunit h                                               | <i>Atp6v1h</i>                      | 1,40045457 | 0,00117138 |
| UDP-galNAc:betaGalNAc beta 1,3-galactosaminyltransferase, polypeptide 2                                   | <i>B3galnt2</i>                     | 1,40042833 | 0,00816213 |
| Predicted gene 4604 /// ribosomal protein l36                                                             | <i>Gm4604 /// rpl36</i>             | 1,40014529 | 0,00228473 |
| Insulin degrading enzyme                                                                                  | <i>Ide</i>                          | 1,40000274 | 0,00068855 |
| Sh3-domain grb2-like endophilin b2                                                                        | <i>Sh3glb2</i>                      | 1,39986929 | 0,00044367 |
| Autophagy/beclin 1 regulator 1                                                                            | <i>Ambra1</i>                       | 1,3997454  | 0,0012534  |
| Rap1 GTPase-activating protein                                                                            | <i>Rap1gap</i>                      | 1,39929992 | 0,00153433 |
| Fc receptor, IgG, low affinity IV                                                                         | <i>Fcgr4</i>                        | 1,39845767 | 0,00086384 |
| Pest proteolytic signal containing nuclear protein                                                        | <i>Pcnp</i>                         | 1,39832306 | 0,00025288 |
| Predicted pseudogene 3244 /// predicted gene 3873 /// NADH dehydrogenase (ubiquinone) 1 beta subcomplex 4 | <i>Gm3244 /// gm3873 /// ndufb4</i> | 1,39820744 | 0,00532929 |
| Riken cDNA D030056L22 gene                                                                                | <i>D030056L22rik</i>                | 1,39808413 | 0,00072287 |
| ER membrane protein complex subunit 2                                                                     | <i>Emc2</i>                         | 1,39803259 | 0,00031162 |
| Sorting nexin 10                                                                                          | <i>Snx10</i>                        | 1,39801796 | 0,00064675 |
| Amme chromosomal region gene 1-like                                                                       | <i>Ammecr1l</i>                     | 1,39725366 | 0,00079435 |
| Vinculin                                                                                                  | <i>Vcl</i>                          | 1,39719936 | 0,00128582 |
| Solute carrier family 39 (metal ion transporter), member 6                                                | <i>Slc39a6</i>                      | 1,39644208 | 0,00085707 |

|                                                                                                |                                    |            |            |
|------------------------------------------------------------------------------------------------|------------------------------------|------------|------------|
| Solute carrier family 12, member 2                                                             | <i>Slc12a2</i>                     | 1,39628896 | 0,00061003 |
| Tripartite motif-containing 8                                                                  | <i>Trim8</i>                       | 1,39625622 | 0,0031059  |
| Kinectin 1                                                                                     | <i>Ktn1</i>                        | 1,39566203 | 0,00154503 |
| Replication termination factor 2 domain containing 1                                           | <i>Rtfdc1</i>                      | 1,3953981  | 0,00379062 |
| Atpase, class vi, type 11b                                                                     | <i>Atp11b</i>                      | 1,39455326 | 0,00048065 |
| General transcription factor ii h, polypeptide 1                                               | <i>Gtf2h1</i>                      | 1,39420383 | 0,00070305 |
| Hcls1 associated x-1                                                                           | <i>Hax1</i>                        | 1,39341707 | 0,00053529 |
| Cdna sequence bc003965                                                                         | <i>Bc003965</i>                    | 1,39311345 | 0,00065884 |
| Sec22 vesicle trafficking protein homolog b (s. Cerevisiae)                                    | <i>Sec22b</i>                      | 1,39308174 | 0,00057573 |
| Predicted gene 5633 /// predicted gene 9178 /// mrt4, mrna turnover 4, homolog (s. Cerevisiae) | <i>Gm5633 /// gm9178 /// mrto4</i> | 1,39301153 | 0,00204262 |
| Spectrin alpha, non-erythrocytic 1                                                             | <i>Sptan1</i>                      | 1,39299598 | 0,00262457 |
| Prefoldin subunit 6                                                                            | <i>Pfdn6</i>                       | 1,39297725 | 0,0019559  |
| Phosphatidylinositol glycan anchor biosynthesis, class a                                       | <i>Piga</i>                        | 1,39271783 | 0,00932937 |
| Tm2 domain containing 3                                                                        | <i>Tm2d3</i>                       | 1,39222738 | 0,00361726 |
| Tectonic family member 3                                                                       | <i>Tctn3</i>                       | 1,39190426 | 0,00176371 |
| Nadh dehydrogenase (ubiquinone) 1 alpha subcomplex, 1                                          | <i>Ndufa1</i>                      | 1,39177482 | 0,00058675 |
| Eukaryotic translation initiation factor 3, subunit g                                          | <i>Eif3g</i>                       | 1,39152629 | 0,0005295  |
| Tectonin beta-propeller repeat containing 1                                                    | <i>Tecpr1</i>                      | 1,39132281 | 0,00538024 |
| Dna segment, chr 2, wayne state university 81, expressed                                       | <i>D2wsu81e</i>                    | 1,39128153 | 0,00027647 |
| Purine rich element binding protein a                                                          | <i>Pura</i>                        | 1,3907496  | 0,00289999 |
| Zinc finger protein 282                                                                        | <i>Zfp282</i>                      | 1,39063774 | 0,00539328 |
| Poly (adp-ribose) polymerase family, member 8                                                  | <i>Parp8</i>                       | 1,39042241 | 0,00158651 |
| Presequence translocase-associated motor 16 homolog (s. Cerevisiae)                            | <i>Pam16</i>                       | 1,39035627 | 0,0010426  |
| Sec22 vesicle trafficking protein homolog a (s. Cerevisiae)                                    | <i>Sec22a</i>                      | 1,3903536  | 0,00609055 |
| Protein tyrosine phosphatase, non-receptor type 6                                              | <i>Ptpn6</i>                       | 1,3902227  | 0,00195128 |
| Protein disulfide isomerase associated 4                                                       | <i>Pdia4</i>                       | 1,38971098 | 0,00194091 |
| Interleukin enhancer binding factor 3                                                          | <i>Ilf3</i>                        | 1,38961331 | 0,00514263 |
| Phosphatidylserine synthase 2                                                                  | <i>Ptdss2</i>                      | 1,38957187 | 0,00071401 |
| Bmp2 inducible kinase                                                                          | <i>Bmp2k</i>                       | 1,38954955 | 0,00274214 |
| Ubiquitin fusion degradation 1 like                                                            | <i>Ufd1l</i>                       | 1,38950135 | 0,00131254 |
| Dph1 homolog (s. Cerevisiae) /// candidate tumor                                               | <i>Dph1 /// ovca2</i>              | 1,38942817 | 0,00021938 |

|                                                                                                  |                                           |            |            |
|--------------------------------------------------------------------------------------------------|-------------------------------------------|------------|------------|
| suppressor in ovarian cancer 2                                                                   |                                           |            |            |
| Trophoblast glycoprotein                                                                         | <i>Tpbp</i>                               | 1,3882963  | 0,00299983 |
| Star-related lipid transfer (start) domain containing 6                                          | <i>Stard6</i>                             | 1,38818298 | 0,00037451 |
| Jun dimerization protein 2                                                                       | <i>Jdp2</i>                               | 1,38738687 | 0,00053113 |
| Mitochondrial ubiquitin ligase activator of nfkb 1                                               | <i>Mul1</i>                               | 1,38724303 | 0,00451346 |
| Wd repeat domain 55                                                                              | <i>Wdr55</i>                              | 1,38723635 | 0,00199321 |
| Serine/threonine kinase 17b (apoptosis-inducing)                                                 | <i>Stk17b</i>                             | 1,38705451 | 0,0021129  |
| Meteorin, glial cell differentiation regulator                                                   | <i>Metrn</i>                              | 1,38696411 | 0,00061741 |
| Negative regulator of ubiquitin-like proteins 1                                                  | <i>Nub1</i>                               | 1,3868764  | 0,00318333 |
| Torsin family 1, member a (torsin a)                                                             | <i>Tor1a</i>                              | 1,38679562 | 0,00376803 |
| Growth factor, erv1 (s. Cerevisiae)-like (augmenter of liver regeneration)                       | <i>Gfer</i>                               | 1,38600452 | 0,0018523  |
| Heme oxygenase (decycling) 2                                                                     | <i>Hmox2</i>                              | 1,3852929  | 0,00042846 |
| Secis binding protein 2-like                                                                     | <i>Secisbp2l</i>                          | 1,38505253 | 0,00165295 |
| Eukaryotic translation elongation factor 1 epsilon 1                                             | <i>Eef1e1</i>                             | 1,38502764 | 0,00362601 |
| Discs, large homolog 1 (drosophila)                                                              | <i>Dlg1</i>                               | 1,38435127 | 0,00091952 |
| Interleukin 17d                                                                                  | <i>Il17d</i>                              | 1,38419024 | 0,00242118 |
| Mob kinase activator 2                                                                           | <i>Mob2</i>                               | 1,38386746 | 0,00072934 |
| Guanosine diphosphate (gdp) dissociation inhibitor 1                                             | <i>Gdi1</i>                               | 1,38381174 | 0,00547171 |
| Ctage family, member 5                                                                           | <i>Ctage5</i>                             | 1,38330371 | 0,00316921 |
| Protein tyrosine phosphatase-like (proline instead of catalytic arginine), member a              | <i>Ptpla</i>                              | 1,38320892 | 0,00075951 |
| Potassium channel tetramerisation domain containing 20                                           | <i>Kctd20</i>                             | 1,38289063 | 0,00296321 |
| Pten induced putative kinase 1                                                                   | <i>Pink1</i>                              | 1,38276756 | 0,00064752 |
| Fumarate hydratase 1                                                                             | <i>Fh1</i>                                | 1,38224409 | 0,0004848  |
| Translocase of inner mitochondrial membrane 17a                                                  | <i>Timm17a</i>                            | 1,38217229 | 0,00151857 |
| Autophagy related 16-like 1 (s. Cerevisiae)                                                      | <i>Atg16l1</i>                            | 1,38204208 | 0,0055567  |
| Inositol polyphosphate-1-phosphatase                                                             | <i>Inpp1</i>                              | 1,38163842 | 0,00147198 |
| Insulin-like growth factor i receptor                                                            | <i>Igf1r</i>                              | 1,38136784 | 0,00394722 |
| Yippee-like 1 (drosophila)                                                                       | <i>Ypel1</i>                              | 1,38119235 | 0,00746014 |
| Smad family member 6                                                                             | <i>Smad6</i>                              | 1,38004098 | 0,0016062  |
| Tankyrase, trf1-interacting ankyrin-related adp-ribose polymerase 2                              | <i>Tnks2</i>                              | 1,37919987 | 0,00057269 |
| Torsin family 1, member b                                                                        | <i>Tor1b</i>                              | 1,37878173 | 0,0062114  |
| Mus musculus 8 days embryo whole body cdna, riken full-length enriched library, clone:5730407p16 | <i>Ak077428 ///</i><br><i>gm16536 ///</i> | 1,37866218 | 0,00928364 |



|                                                                                                                         |                                    |            |            |
|-------------------------------------------------------------------------------------------------------------------------|------------------------------------|------------|------------|
| product:unclassifiable, full insert sequence. /// --- ///                                                               | <i>gm16536</i>                     |            |            |
| predicted gene 16536                                                                                                    |                                    |            |            |
| Ferritin light chain 1 /// predicted gene, 20746 ///                                                                    | <i>Ftl1</i> /// <i>gm20746</i> /// | 1,37833587 | 0,00018834 |
| ferritin light chain 1-like                                                                                             | <i>loc100862446</i>                |            |            |
| Dead (asp-glu-ala-asp) box polypeptide 19b                                                                              | <i>Ddx19b</i>                      | 1,3780859  | 0,00293635 |
| Proteasome (prosome, macropain) 26s subunit, non-atpase, 5                                                              | <i>Psmc5</i>                       | 1,37806851 | 0,00645871 |
| Solute carrier family 25, member 28                                                                                     | <i>Slc25a28</i>                    | 1,37784131 | 0,00277732 |
| Transmembrane protein 42                                                                                                | <i>Tmem42</i>                      | 1,3776077  | 0,00046633 |
| Phosphatidic acid phosphatase type 2b                                                                                   | <i>Ppap2b</i>                      | 1,37732063 | 0,00146111 |
| Xylosylprotein beta1,4-galactosyltransferase, polypeptide 7 (galactosyltransferase i)                                   | <i>B4galt7</i>                     | 1,37715108 | 0,00546333 |
| Nuclear cap binding protein subunit 2                                                                                   | <i>Ncbp2</i>                       | 1,37620497 | 0,0008092  |
| 5-methyltetrahydrofolate-homocysteine methyltransferase reductase                                                       | <i>Mtrr</i>                        | 1,37608391 | 0,00079891 |
| Tetratricopeptide repeat domain 33                                                                                      | <i>Ttc33</i>                       | 1,37531225 | 0,00650189 |
| Phosphatidylinositol glycan anchor biosynthesis, class q                                                                | <i>Pigq</i>                        | 1,37517841 | 0,00162828 |
| Mesencephalic astrocyte-derived neurotrophic factor                                                                     | <i>Manf</i>                        | 1,37475371 | 0,00047195 |
| Carcinoembryonic antigen-related cell adhesion molecule 1 /// carcinoembryonic antigen-related cell adhesion molecule 2 | <i>Ceacam1</i> /// <i>ceacam2</i>  | 1,37446629 | 0,00069895 |
| Riken cdna 2410015m20 gene                                                                                              | <i>2410015m20rik</i>               | 1,3744155  | 0,00042666 |
| Kri1 homolog (s. Cerevisiae)                                                                                            | <i>Kri1</i>                        | 1,37406077 | 0,00210919 |
| Mitochondrial ribosomal protein l45                                                                                     | <i>Mrpl45</i>                      | 1,37378403 | 0,00106204 |
| Transmembrane emp24 protein transport domain containing 5                                                               | <i>Tmed5</i>                       | 1,3735133  | 0,00746014 |
| Intraflagellar transport 172                                                                                            | <i>Ifi172</i>                      | 1,37270671 | 0,00090512 |
| Ubiquitin specific peptidase 10                                                                                         | <i>Usp10</i>                       | 1,37216292 | 0,00732239 |
| Aminoacyl trna synthetase complex-interacting multifunctional protein 1                                                 | <i>Aimp1</i>                       | 1,37183287 | 0,00086907 |
| Solute carrier family 35 (udp-n-acetylglucosamine (udp-glcna) transporter), member 3                                    | <i>Slc35a3</i>                     | 1,3714697  | 0,00203335 |
| Reduced expression 2                                                                                                    | <i>Rex2</i>                        | 1,37145731 | 0,00231183 |
| Prolylcarboxypeptidase (angiotensinase c)                                                                               | <i>Prp</i>                         | 1,37120924 | 0,00822584 |
| Presenilin associated, rhomboid-like                                                                                    | <i>Parl</i>                        | 1,37101077 | 0,00571392 |
| C-type lectin domain family 2, member h                                                                                 | <i>Clec2h</i>                      | 1,37066801 | 0,00133778 |
| Leucine rich repeat containing 8a /// phytanoyl-coa                                                                     | <i>Lrrc8a</i> /// <i>phyhd1</i>    | 1,37037111 | 0,00240372 |

|                                                                                                                      |                                 |            |            |
|----------------------------------------------------------------------------------------------------------------------|---------------------------------|------------|------------|
| dioxygenase domain containing 1                                                                                      |                                 |            |            |
| Mannose phosphate isomerase                                                                                          | <i>Mpi</i>                      | 1,37027154 | 0,0006222  |
| Hexosaminidase a                                                                                                     | <i>Hexa</i>                     | 1,37010029 | 0,00035066 |
| Apoptosis-inducing factor, mitochondrion-associated 1                                                                | <i>Aifm1</i>                    | 1,36981959 | 0,00121652 |
| Cytidine deaminase                                                                                                   | <i>Cda</i>                      | 1,36968147 | 0,00121958 |
| Solute carrier family 11 (proton-coupled divalent metal ion transporters), member 1                                  | <i>Slc11a1</i>                  | 1,36954326 | 0,00458178 |
| Pyroglutamyl-peptidase i                                                                                             | <i>Pgpep1</i>                   | 1,36953052 | 0,00100019 |
| Zinc finger protein 280c                                                                                             | <i>Zfp280c</i>                  | 1,36943181 | 0,0040226  |
| Pro-platelet basic protein                                                                                           | <i>Ppbp</i>                     | 1,36927065 | 0,00346648 |
| Elac homolog 2 (e. Coli)                                                                                             | <i>Elac2</i>                    | 1,36903717 | 0,00114401 |
| Signal sequence receptor, beta                                                                                       | <i>Ssr2</i>                     | 1,36872201 | 0,00063821 |
| Glutamine-rich 1                                                                                                     | <i>Qrich1</i>                   | 1,36809934 | 0,00047417 |
| Serine/threonine kinase 16                                                                                           | <i>Stk16</i>                    | 1,36786159 | 0,00370534 |
| Casp8 and fadd-like apoptosis regulator                                                                              | <i>Cflar</i>                    | 1,36765636 | 0,00076633 |
| Taf13 rna polymerase ii, tata box binding protein (tbp)-associated factor                                            | <i>Taf13</i>                    | 1,36709555 | 0,00113347 |
| Secretory carrier membrane protein 1                                                                                 | <i>Scamp1</i>                   | 1,36706852 | 0,00154139 |
| Mitochondrial ribosomal protein l41                                                                                  | <i>Mrpl41</i>                   | 1,36696221 | 0,00383083 |
| Zinc finger protein 654                                                                                              | <i>Zfp654</i>                   | 1,36656669 | 0,00780233 |
| Sr-related ctd-associated factor 4                                                                                   | <i>Scaf4</i>                    | 1,36628966 | 0,00677835 |
| Adp-ribosylation factor-like 6                                                                                       | <i>Arl6</i>                     | 1,36621408 | 0,00858393 |
| Metastasis associated 1                                                                                              | <i>Mta1</i>                     | 1,36604619 | 0,00728953 |
| Eukaryotic translation initiation factor 2b, subunit 2 beta                                                          | <i>Eif2b2</i>                   | 1,36574456 | 0,00367869 |
| Tsr1 20s rna accumulation                                                                                            | <i>Tsr1</i>                     | 1,36531258 | 0,00109963 |
| Myotubularin related protein 1                                                                                       | <i>Mtmr1</i>                    | 1,36504983 | 0,00023477 |
| Diablo homolog (drosophila)                                                                                          | <i>Diablo</i>                   | 1,36441226 | 0,00083349 |
| Grb10 interacting gyf protein 2                                                                                      | <i>Gigyf2</i>                   | 1,36439776 | 0,00071844 |
| Diphthamine biosynthesis 7                                                                                           | <i>Dph7</i>                     | 1,36410553 | 0,00102691 |
| Ribosomal protein l35                                                                                                | <i>Rpl35</i>                    | 1,3635973  | 0,00071343 |
| Eukaryotic translation initiation factor 3, subunit j1<br>/// eukaryotic translation initiation factor 3, subunit j2 | <i>Eif3j1</i> /// <i>eif3j2</i> | 1,36321704 | 0,00668498 |
| Wd repeat domain 48                                                                                                  | <i>Wdr48</i>                    | 1,36320212 | 0,00168108 |
| Riken cdna 6330416g13 gene                                                                                           | <i>6330416g13rik</i>            | 1,36224362 | 0,0064342  |
| Predicted gene 7285 /// ribosomal protein s7                                                                         | <i>Gm7285</i> /// <i>rps7</i>   | 1,36217145 | 0,0026667  |

|                                                                                                                              |                         |            |            |
|------------------------------------------------------------------------------------------------------------------------------|-------------------------|------------|------------|
| Predicted pseudogene 9385 /// ribosomal protein l24                                                                          | <i>Gm9385 /// rpl24</i> | 1,36216923 | 0,00028524 |
| Upf2 regulator of nonsense transcripts homolog (yeast)                                                                       | <i>Upf2</i>             | 1,36189298 | 0,00071427 |
| Polymerase (rna) i polypeptide e                                                                                             | <i>Polr1e</i>           | 1,36185197 | 0,00612849 |
| Coordinator of prmt5, differentiation stimulator                                                                             | <i>Coprs</i>            | 1,36166451 | 0,00086182 |
| Transmembrane protein 161a                                                                                                   | <i>Tmem161a</i>         | 1,36147637 | 0,00043582 |
| Methyl cpG binding protein 2                                                                                                 | <i>Mecp2</i>            | 1,36145459 | 0,00127993 |
| Casein kinase 1, delta                                                                                                       | <i>Csnk1d</i>           | 1,3608109  | 0,00442723 |
| N-acylsphingosine amidohydrolase 1                                                                                           | <i>Asah1</i>            | 1,36002106 | 0,0017004  |
| Atp-binding cassette, sub-family f (gcn20), member 3                                                                         | <i>Abcf3</i>            | 1,35986394 | 0,00322906 |
| Slit-robo rho gtpase activating protein 1                                                                                    | <i>Srgap1</i>           | 1,35977121 | 0,00551035 |
| Rna-binding region (rnp1, rrm) containing 3                                                                                  | <i>Rnpc3</i>            | 1,35968812 | 0,00722468 |
| Family with sequence similarity 50, member a                                                                                 | <i>Fam50a</i>           | 1,35955073 | 0,00103352 |
| Inositol 1,4,5-trisphosphate receptor 1                                                                                      | <i>Itpr1</i>            | 1,35913414 | 0,00066273 |
| Rna binding motif protein 4b                                                                                                 | <i>Rbm4b</i>            | 1,35862653 | 0,0050737  |
| Stomatin (epb7.2)-like 2                                                                                                     | <i>Stoml2</i>           | 1,3585339  | 0,00119162 |
| At rich interactive domain 5a (mrf1-like)                                                                                    | <i>Arid5a</i>           | 1,3583953  | 0,00209079 |
| Fyve and coiled-coil domain containing 1                                                                                     | <i>Fyco1</i>            | 1,35813557 | 0,00241148 |
| Protein phosphatase 1, regulatory (inhibitor) subunit 15b                                                                    | <i>Ppp1r15b</i>         | 1,35803156 | 0,00060066 |
| Predicted gene 2808 /// tubby like protein 4                                                                                 | <i>Gm2808 /// tulp4</i> | 1,35798806 | 0,00347495 |
| Testis expressed gene 10                                                                                                     | <i>Tex10</i>            | 1,35765945 | 0,00045089 |
| Required for meiotic nuclear division 1 pseudogene<br>/// required for meiotic nuclear division 1 homolog<br>(s. Cerevisiae) | <i>Gm5512 /// rmnd1</i> | 1,35750853 | 0,00183074 |
| Expressed sequence ai314180                                                                                                  | <i>Ai314180</i>         | 1,35730239 | 0,00212096 |
| Trimethylguanosine synthase homolog (s. Cerevisiae)                                                                          | <i>Tgs1</i>             | 1,35683294 | 0,00608003 |
| Acyl-coenzyme a dehydrogenase, short/branched chain                                                                          | <i>Acadslb</i>          | 1,35652406 | 0,00214542 |
| M-phase phosphoprotein 10 (u3 small nucleolar ribonucleoprotein)                                                             | <i>Mphosph10</i>        | 1,35647494 | 0,00203965 |
| Epidermal growth factor-containing fibulin-like extracellular matrix protein 2                                               | <i>Efemp2</i>           | 1,35613734 | 0,00099441 |
| Nadh dehydrogenase (ubiquinone) fe-s protein 4                                                                               | <i>Ndufs4</i>           | 1,35549853 | 0,00344105 |
| Surfeit gene 2                                                                                                               | <i>Surf2</i>            | 1,35545771 | 0,00257835 |
| Phosphomannomutase 1                                                                                                         | <i>Pmm1</i>             | 1,35513618 | 0,0034256  |
| Coenzyme q4 homolog (yeast)                                                                                                  | <i>Coq4</i>             | 1,35497069 | 0,00082966 |

|                                                                                        |                           |            |            |
|----------------------------------------------------------------------------------------|---------------------------|------------|------------|
| Hippocampus abundant gene transcript 1                                                 | <i>Hiat1</i>              | 1,35491609 | 0,00715539 |
| Sumo/sentrin specific peptidase 2                                                      | <i>Senp2</i>              | 1,35488282 | 0,00322182 |
| Ring finger protein 214                                                                | <i>Rnf214</i>             | 1,35413751 | 0,00685461 |
| Cadherin 13                                                                            | <i>Cdh13</i>              | 1,35411394 | 0,0013628  |
| Akirin 2                                                                               | <i>Akirin2</i>            | 1,35403734 | 0,00100232 |
| Udp-gal:betaglcnac beta 1,4-galactosyltransferase, polypeptide 3                       | <i>B4galt3</i>            | 1,35380046 | 0,00129647 |
| Cdp-diacylglycerol--inositol 3-phosphatidyltransferase (phosphatidylinositol synthase) | <i>Cdipt</i>              | 1,35343241 | 0,00080379 |
| Heat shock protein 1 (chaperonin)                                                      | <i>Hspd1</i>              | 1,35290744 | 0,0036955  |
| Sterile alpha motif domain containing 4                                                | <i>Samd4</i>              | 1,35134103 | 0,00397338 |
| Flotillin 1                                                                            | <i>Flot1</i>              | 1,35079662 | 0,00323719 |
| Nth (endonuclease iii)-like 1 (e.coli)                                                 | <i>Nthl1</i>              | 1,35063177 | 0,0008837  |
| Spectrin beta, non-erythrocytic 1                                                      | <i>Sptbn1</i>             | 1,35048233 | 0,0010338  |
| Tox high mobility group box family member 4                                            | <i>Tox4</i>               | 1,35030056 | 0,00148071 |
| Golgi associated, gamma adaptin ear containing, arf binding protein 1                  | <i>Gga1</i>               | 1,35020091 | 0,00326354 |
| Sorting nexin 14                                                                       | <i>Snx14</i>              | 1,34957442 | 0,00961606 |
| Heat shock factor binding protein 1                                                    | <i>Hsbp1</i>              | 1,3495631  | 0,00046654 |
| Small nuclear ribonucleoprotein 48 (u11/u12)                                           | <i>Snrnp48</i>            | 1,34918866 | 0,00570279 |
| Breast carcinoma amplified sequence 3                                                  | <i>Bcas3</i>              | 1,34904912 | 0,0032547  |
| Mis12 homolog (yeast)                                                                  | <i>Mis12</i>              | 1,34889131 | 0,001871   |
| Rna polymerase ii associated protein 1                                                 | <i>Rpap1</i>              | 1,34882186 | 0,00070798 |
| Glucosaminyl (n-acetyl) transferase 3, mucin type                                      | <i>Gcnt3</i>              | 1,34879519 | 0,00299983 |
| Riken cDNA 1810026j23 gene                                                             | <i>1810026j23rik</i>      | 1,34864646 | 0,00057618 |
| Transducin-like enhancer of split 6, homolog of drosophila e(spl)                      | <i>Tle6</i>               | 1,34814766 | 0,00150814 |
| Family with sequence similarity 220, member a                                          | <i>Fam220a</i>            | 1,34808948 | 0,00120974 |
| Glutathione s-transferase, mu 2                                                        | <i>Gstm2</i>              | 1,34807212 | 0,00116459 |
| Basic leucine zipper nuclear factor 1                                                  | <i>Blzf1</i>              | 1,34784837 | 0,00743821 |
| Vacuolar protein sorting 54 (yeast)                                                    | <i>Vps54</i>              | 1,3477572  | 0,00375628 |
| Oxidative-stress responsive 1                                                          | <i>Oxsr1</i>              | 1,34773006 | 0,00739893 |
| Cell division cycle associated 7                                                       | <i>Cdca7</i>              | 1,34765519 | 0,00789283 |
| Ciliary neurotrophic factor /// zinc finger protein 91                                 | <i>Cntf /// zfp91 ///</i> | 1,34713261 | 0,00284465 |
| /// zfp91-cntf readthrough transcript (nmd candidate)                                  | <i>zfp91cntf</i>          |            |            |
| Glycine cleavage system protein h (aminomethyl                                         | <i>Gcsh</i>               | 1,34682104 | 0,00071401 |

|                                                                                                                                                        |                                                                                                                                  |            |            |
|--------------------------------------------------------------------------------------------------------------------------------------------------------|----------------------------------------------------------------------------------------------------------------------------------|------------|------------|
| carrier)                                                                                                                                               |                                                                                                                                  |            |            |
| Dynein cytoplasmic 1 heavy chain 1                                                                                                                     | <i>Dync1h1</i>                                                                                                                   | 1,34661058 | 0,00176349 |
| Cyclin-dependent kinase 5                                                                                                                              | <i>Cdk5</i>                                                                                                                      | 1,34638289 | 0,00268569 |
| Neurofibromatosis 1                                                                                                                                    | <i>Nf1</i>                                                                                                                       | 1,34632647 | 0,00582227 |
| Chromatin target of prmt1                                                                                                                              | <i>Chtop</i>                                                                                                                     | 1,34629261 | 0,00061967 |
| Eukaryotic translation initiation factor 4a2                                                                                                           | <i>Eif4a2</i>                                                                                                                    | 1,34619061 | 0,00740536 |
| Start domain containing 3                                                                                                                              | <i>Stard3</i>                                                                                                                    | 1,34605371 | 0,00333333 |
| Male-specific lethal 2 homolog (drosophila)                                                                                                            | <i>Msl2</i>                                                                                                                      | 1,34604871 | 0,00741413 |
| Phospholipase a2, group xia                                                                                                                            | <i>Pla2g12a</i>                                                                                                                  | 1,34531022 | 0,00289939 |
| Gtf2i repeat domain containing 2                                                                                                                       | <i>Gtf2ird2</i>                                                                                                                  | 1,34528582 | 0,00104673 |
| Wd repeat domain 61                                                                                                                                    | <i>Wdr61</i>                                                                                                                     | 1,34524698 | 0,00119433 |
| Serine (or cysteine) peptidase inhibitor, clade h, member 1                                                                                            | <i>Serpinh1</i>                                                                                                                  | 1,34515521 | 0,00178485 |
| Nudix (nucleoside diphosphate linked moiety x)-type motif 22                                                                                           | <i>Nudt22</i>                                                                                                                    | 1,34511345 | 0,00183586 |
| Interleukin 18 receptor accessory protein                                                                                                              | <i>Il18rap</i>                                                                                                                   | 1,3446796  | 0,00564447 |
| Small integral membrane protein 19                                                                                                                     | <i>Smim19</i>                                                                                                                    | 1,34422467 | 0,00096218 |
| Protein kinase, camp dependent, catalytic, beta                                                                                                        | <i>Prkacb</i>                                                                                                                    | 1,34420818 | 0,0008665  |
| Wd repeat, sam and u-box domain containing 1                                                                                                           | <i>Wdsub1</i>                                                                                                                    | 1,34398165 | 0,00322906 |
| Nol1/nop2/sun domain family, member 4                                                                                                                  | <i>Nsun4</i>                                                                                                                     | 1,34337264 | 0,0045636  |
| Numb-like                                                                                                                                              | <i>Numbl</i>                                                                                                                     | 1,34293187 | 0,0041639  |
| Elongator acetyltransferase complex subunit 3                                                                                                          | <i>Elp3</i>                                                                                                                      | 1,34287548 | 0,00252493 |
| Golgi integral membrane protein 4                                                                                                                      | <i>Golim4</i>                                                                                                                    | 1,3424914  | 0,00632128 |
| High mobility group 20a                                                                                                                                | <i>Hmg20a</i>                                                                                                                    | 1,34227102 | 0,00088457 |
| Adaptor-related protein complex 1 associated regulatory protein                                                                                        | <i>Ap1ar</i>                                                                                                                     | 1,34214388 | 0,00228295 |
| Intersectin 2                                                                                                                                          | <i>Itsn2</i>                                                                                                                     | 1,34205856 | 0,00723581 |
| Proteasome (prosome, macropain) subunit, beta type 10                                                                                                  | <i>Psmb10</i>                                                                                                                    | 1,34198717 | 0,00675416 |
| Nmda receptor synaptonuclear signaling and neuronal migration factor                                                                                   | <i>Nsmf</i>                                                                                                                      | 1,34198164 | 0,00357393 |
| Predicted pseudogene 10913 /// predicted gene 12447                                                                                                    | <i>Gm10913 ///</i>                                                                                                               | 1,34178569 | 0,00089286 |
| /// predicted gene 12508 /// predicted pseudogene 8210 /// 60s ribosomal protein l29-like /// 60s ribosomal protein l29-like /// ribosomal protein l29 | <i>gm12447 ///</i><br><i>gm12508 ///</i> <i>gm8210</i><br><i>/// loc100503055 ///</i><br><i>loc102642233 ///</i><br><i>rpl29</i> |            |            |
| Importin 4                                                                                                                                             | <i>Ipo4</i>                                                                                                                      | 1,3417503  | 0,00714285 |

|                                                                                     |                               |            |            |
|-------------------------------------------------------------------------------------|-------------------------------|------------|------------|
| Set and mynd domain containing 2                                                    | <i>Smyd2</i>                  | 1,34172532 | 0,00243102 |
| Proviral integration site 1                                                         | <i>Pim1</i>                   | 1,34157145 | 0,0012748  |
| Opioid growth factor receptor                                                       | <i>Ogfr</i>                   | 1,3403252  | 0,0023667  |
| Nme/nm23 nucleoside diphosphate kinase 6                                            | <i>Nme6</i>                   | 1,34027979 | 0,00142936 |
| Ferredoxin reductase                                                                | <i>Fdxr</i>                   | 1,34027034 | 0,00050063 |
| Eukaryotic translation initiation factor 1 /// predicted pseudogene 5471            | <i>Eif1</i> /// <i>gm5471</i> | 1,33988727 | 0,0021332  |
| Poly (adp-ribose) polymerase family, member 16                                      | <i>Parp16</i>                 | 1,33976139 | 0,00509173 |
| Solute carrier family 11 (proton-coupled divalent metal ion transporters), member 2 | <i>Slc11a2</i>                | 1,33970316 | 0,00129693 |
| Nima (never in mitosis gene a)-related expressed kinase 9                           | <i>Nek9</i>                   | 1,33952721 | 0,00055117 |
| Zinc finger, an1-type domain 3                                                      | <i>Zfand3</i>                 | 1,33952712 | 0,00543047 |
| Brain and reproductive organ-expressed protein                                      | <i>Bre</i>                    | 1,33941798 | 0,00175026 |
| Elongator acetyltransferase complex subunit 2                                       | <i>Elp2</i>                   | 1,33914252 | 0,00131306 |
| Inhibitor of kappab kinase beta                                                     | <i>Ikbkb</i>                  | 1,3386815  | 0,00317157 |
| Coagulation factor viii                                                             | <i>F8</i>                     | 1,33867984 | 0,00212155 |
| F-box and wd-40 domain protein 7                                                    | <i>Fbxw7</i>                  | 1,33857151 | 0,00714958 |
| Acireductone dioxygenase 1                                                          | <i>Adi1</i>                   | 1,33850927 | 0,00323663 |
| Rna binding motif protein 5                                                         | <i>Rbm5</i>                   | 1,33846294 | 0,00863109 |
| Cell division cycle 37-like 1                                                       | <i>Cdc37l1</i>                | 1,33833892 | 0,00176696 |
| Mitochondrial ribosomal protein l3                                                  | <i>Mrpl3</i>                  | 1,33819054 | 0,00372104 |
| Peptidylprolyl isomerase (cyclophilin)-like 2                                       | <i>Ppil2</i>                  | 1,33793261 | 0,00934565 |
| Protein tyrosine phosphatase-like a domain containing 1                             | <i>Ptplad1</i>                | 1,3378043  | 0,0022835  |
| Tissue inhibitor of metalloproteinase 1                                             | <i>Timp1</i>                  | 1,33773532 | 0,00101601 |
| Melanoma antigen, family d, 1                                                       | <i>Maged1</i>                 | 1,33764496 | 0,00106339 |
| Phosphodiesterase 6d, cgmp-specific, rod, delta                                     | <i>Pde6d</i>                  | 1,33752183 | 0,0015058  |
| Matrix metalloproteinase 19                                                         | <i>Mmp19</i>                  | 1,33728578 | 0,00580171 |
| Ik cytokine                                                                         | <i>Ik</i>                     | 1,33727791 | 0,00077909 |
| Grpe-like 2, mitochondrial                                                          | <i>Grpel2</i>                 | 1,33705431 | 0,00160462 |
| Cdna sequence bc023829                                                              | <i>Bc023829</i>               | 1,33600386 | 0,00087432 |
| Btb (poz) domain containing 10                                                      | <i>Btbd10</i>                 | 1,33518842 | 0,00261928 |
| Intraflagellar transport 57                                                         | <i>Ift57</i>                  | 1,334164   | 0,00073651 |
| Cytotoxic t lymphocyte-associated protein 2 alpha                                   | <i>Ctla2a</i>                 | 1,33401975 | 0,0013697  |
| Mannoside acetylglucosaminyltransferase 1                                           | <i>Mgat1</i>                  | 1,33394746 | 0,00305086 |
| A disintegrin and metalloproteinase domain 10                                       | <i>Adam10</i>                 | 1,3338209  | 0,0047717  |
| Membrane-associated ring finger (c3hc4) 5                                           | <i>Iii.05</i>                 | 1,33375374 | 0,000737   |

|                                                               |                       |            |            |
|---------------------------------------------------------------|-----------------------|------------|------------|
| Huntingtin interacting protein k /// small edrk-rich factor 2 | <i>Hypk /// serf2</i> | 1,33284231 | 0,00086467 |
| Stress-associated endoplasmic reticulum protein 1             | <i>Serp1</i>          | 1,3326115  | 0,00444626 |
| Run and fyve domain containing 3                              | <i>Rufy3</i>          | 1,3325576  | 0,0098848  |
| Eukaryotic translation initiation factor 5b                   | <i>Eif5b</i>          | 1,33246952 | 0,00897907 |
| Rna pseudouridylate synthase domain containing 4              | <i>Rpusd4</i>         | 1,33210662 | 0,00087353 |
| Mediator complex subunit 1                                    | <i>Med1</i>           | 1,33186007 | 0,00144375 |
| Ubiquitin-like modifier activating enzyme 5                   | <i>Uba5</i>           | 1,33179003 | 0,00087241 |
| Fic domain containing                                         | <i>Ficd</i>           | 1,33110618 | 0,00789226 |
| Endoplasmic reticulum metalloproteinase 1                     | <i>Ermp1</i>          | 1,33105243 | 0,00688392 |
| Mitochondrial ribosomal protein l12                           | <i>Mrpl12</i>         | 1,33059872 | 0,00075387 |
| Fasciculation and elongation protein zeta 2 (zygin ii)        | <i>Fez2</i>           | 1,33019344 | 0,0005663  |
| Uv radiation resistance associated gene                       | <i>Uvrag</i>          | 1,32985685 | 0,0013697  |
| Ribosomal protein s7                                          | <i>Rps7</i>           | 1,32977338 | 0,00109963 |
| Late cornified envelope 1f                                    | <i>Lce1f</i>          | 1,32957725 | 0,00650609 |
| Large subunit gtpase 1 homolog (s. Cerevisiae)                | <i>Lsg1</i>           | 1,32930392 | 0,00689096 |
| Solute carrier family 25, member 30                           | <i>Slc25a30</i>       | 1,32922516 | 0,00603852 |
| Atp-binding cassette, sub-family b (mdr/tap), member 9        | <i>Abcb9</i>          | 1,32918034 | 0,00518708 |
| Acyl-coenzyme a oxidase 1, palmitoyl                          | <i>Acox1</i>          | 1,32887028 | 0,00063584 |
| Secreted phosphoprotein 1                                     | <i>Spp1</i>           | 1,32882477 | 0,00321777 |
| Abhydrolase domain containing 4                               | <i>Abhd4</i>          | 1,32850013 | 0,00296321 |
| Histone cluster 1, h2bp                                       | <i>Hist1h2bp</i>      | 1,32815163 | 0,00391278 |
| Zinc finger protein 354b                                      | <i>Zfp354b</i>        | 1,32808415 | 0,00094885 |
| Peroxisomal biogenesis factor 6                               | <i>Pex6</i>           | 1,32789455 | 0,00996641 |
| Myosin, light chain 12b, regulatory                           | <i>Myl12b</i>         | 1,32785904 | 0,00104396 |
| Wd repeat domain, phosphoinositide interacting 2              | <i>Wipi2</i>          | 1,32725188 | 0,0018571  |
| Polyadenylate-binding protein-interacting protein 2           | <i>Paip2</i>          | 1,32721851 | 0,00395219 |
| Retinol dehydrogenase 13 (all-trans and 9-cis)                | <i>Rdh13</i>          | 1,32698051 | 0,00278018 |
| Dynactin 3                                                    | <i>Dctn3</i>          | 1,32680366 | 0,0031207  |
| Alkb, alkylation repair homolog 4 (e. Coli)                   | <i>Alkbh4</i>         | 1,32633273 | 0,00522702 |
| Prosaposin                                                    | <i>Psap</i>           | 1,32631186 | 0,0023667  |
| Thap domain containing 7                                      | <i>Thap7</i>          | 1,3260543  | 0,00830914 |
| Oxidative stress responsive serine rich 1                     | <i>Oser1</i>          | 1,32580303 | 0,00131508 |
| Membrane metallo endopeptidase                                | <i>Mme</i>            | 1,32532324 | 0,00459943 |
| Ran, member ras oncogene family                               | <i>Ran</i>            | 1,32508419 | 0,00639988 |
| Max binding protein                                           | <i>Mnt</i>            | 1,32478279 | 0,00781797 |
| Mindbomb homolog 2 (drosophila)                               | <i>Mib2</i>           | 1,32461466 | 0,0063252  |

|                                                                              |                      |            |            |
|------------------------------------------------------------------------------|----------------------|------------|------------|
| Sh3-domain binding protein 2                                                 | <i>Sh3bp2</i>        | 1,324575   | 0,00480858 |
| Cytochrome b-561 domain containing 2                                         | <i>Cyb561d2</i>      | 1,32425875 | 0,00386891 |
| Transmembrane protein 230                                                    | <i>Tmem230</i>       | 1,3241962  | 0,00169184 |
| Dnl-type zinc finger                                                         | <i>Dnlz</i>          | 1,32372173 | 0,00193858 |
| Riken cdna 4932438a13 gene                                                   | <i>4932438a13rik</i> | 1,32367207 | 0,00910443 |
| Riken cdna 1600014c10 gene                                                   | <i>1600014c10rik</i> | 1,32357434 | 0,00268684 |
| Arginyl-trna synthetase                                                      | <i>Rars</i>          | 1,32305343 | 0,00187838 |
| Metal response element binding transcription factor 1                        | <i>Mtf1</i>          | 1,3226859  | 0,00402692 |
| Cdna sequence bc017643                                                       | <i>Bc017643</i>      | 1,32239282 | 0,00228085 |
| Zinc finger protein 318                                                      | <i>Zfp318</i>        | 1,32224208 | 0,0014909  |
| Gc-rich promoter binding protein 1                                           | <i>Gpbp1</i>         | 1,32223625 | 0,00344679 |
| Zinc finger protein 287                                                      | <i>Zfp287</i>        | 1,32202545 | 0,00700704 |
| Rwd domain containing 4a                                                     | <i>Rwdd4a</i>        | 1,32199684 | 0,00831392 |
| Riken cdna 2810403a07 gene                                                   | <i>2810403a07rik</i> | 1,32194554 | 0,0068421  |
| Vacuolar protein sorting 11 (yeast)                                          | <i>Vps11</i>         | 1,32181555 | 0,00357032 |
| Inositol hexaphosphate kinase 1                                              | <i>Ip6k1</i>         | 1,32160084 | 0,00958554 |
| Ribonuclease p/mrp 25 subunit-like                                           | <i>Rpp25l</i>        | 1,32141339 | 0,00158779 |
| Dual specificity phosphatase 3 (vaccinia virus phosphatase vh1-related)      | <i>Dusp3</i>         | 1,32135001 | 0,0088987  |
| Jagunal homolog 1 (drosophila)                                               | <i>Jagn1</i>         | 1,32132492 | 0,00330018 |
| Nadh dehydrogenase (ubiquinone) 1 alpha subcomplex, 13                       | <i>Ndufa13</i>       | 1,32124036 | 0,00307471 |
| Translocated promoter region, nuclear basket protein                         | <i>Tpr</i>           | 1,3208708  | 0,00344966 |
| Vacuolar protein sorting 45 (yeast)                                          | <i>Vps45</i>         | 1,32079887 | 0,00326618 |
| Isoleucine-trna synthetase                                                   | <i>Iars</i>          | 1,319945   | 0,00187073 |
| Programmed cell death 2                                                      | <i>Pdcd2</i>         | 1,31940475 | 0,00244794 |
| Protein kinase, interferon inducible double stranded rna dependent activator | <i>Prkra</i>         | 1,31932777 | 0,00315256 |
| Nme/nm23 nucleoside diphosphate kinase 2                                     | <i>Nme2</i>          | 1,31930706 | 0,00100432 |
| Atpase, h+ transporting, lysosomal v1 subunit g1                             | <i>Atp6v1g1</i>      | 1,31904027 | 0,00108424 |
| Rna binding motif protein 28                                                 | <i>Rbm28</i>         | 1,31869214 | 0,00807134 |
| Zinc finger protein 746                                                      | <i>Zfp746</i>        | 1,31851434 | 0,00156806 |
| Reticulocalbin 1                                                             | <i>Rcn1</i>          | 1,31836252 | 0,00368403 |
| Ubiquitin-conjugating enzyme e2h                                             | <i>Ube2h</i>         | 1,31800774 | 0,0050093  |
| Riken cdna 1110037f02 gene                                                   | <i>1110037f02rik</i> | 1,31782726 | 0,00181209 |
| Swi/snf related, matrix associated, actin dependent                          | <i>Smarcc1</i>       | 1,31738651 | 0,00207384 |



|                                                                     |                                  |            |            |
|---------------------------------------------------------------------|----------------------------------|------------|------------|
| regulator of chromatin, subfamily c, member 1                       |                                  |            |            |
| Mediator complex subunit 19                                         | <i>Med19</i>                     | 1,31737694 | 0,00496726 |
| Gar1 ribonucleoprotein homolog (yeast)                              | <i>Gar1</i>                      | 1,31729581 | 0,00082966 |
| Zinc finger, ran-binding domain containing 1                        | <i>Zranb1</i>                    | 1,31684059 | 0,00564447 |
| Family with sequence similarity 45, member a                        | <i>Fam45a</i>                    | 1,31678701 | 0,00382877 |
| Dnaj (hsp40) homolog, subfamily b, member 2                         | <i>Dnajb2</i>                    | 1,31665652 | 0,00306167 |
| Signal transducer and activator of transcription 3                  | <i>Stat3</i>                     | 1,31665263 | 0,00308547 |
| Tripartite motif-containing 11                                      | <i>Trim11</i>                    | 1,31662195 | 0,00201162 |
| Zinc finger protein 280d                                            | <i>Zfp280d</i>                   | 1,3161894  | 0,00444119 |
| Cystatin b                                                          | <i>Cstb</i>                      | 1,31492341 | 0,00267199 |
| Tip41, tor signalling pathway regulator-like (s. Cerevisiae)        | <i>Tipr1</i>                     | 1,31491152 | 0,00829076 |
| Rna binding motif protein 8a                                        | <i>Rbm8a</i>                     | 1,31467352 | 0,00820786 |
| High mobility group box transcription factor 1                      | <i>Hbp1</i>                      | 1,31455557 | 0,0068216  |
| Enoyl coenzyme a hydratase 1, peroxisomal                           | <i>Ech1</i>                      | 1,31427921 | 0,00299985 |
| Dihydrouridine synthase 1-like (s. Cerevisiae)                      | <i>Dus1l</i>                     | 1,31405999 | 0,0027707  |
| Proteasome (prosome, macropain) 26s subunit, non-atpase, 4          | <i>Psm4</i>                      | 1,31226165 | 0,00283158 |
| Glia maturation factor, beta                                        | <i>Gmfb</i>                      | 1,31218208 | 0,00178537 |
| Coiled-coil domain containing 71                                    | <i>Ccdc71</i>                    | 1,31207935 | 0,00563344 |
| Activator of basal transcription 1                                  | <i>Abt1</i>                      | 1,31199089 | 0,00339483 |
| Start domain containing 7                                           | <i>Stard7</i>                    | 1,31196152 | 0,00162045 |
| Synovial sarcoma, x breakpoint 2 interacting protein                | <i>Ssx2ip</i>                    | 1,31134157 | 0,00184137 |
| Predicted pseudogene 10913 /// predicted gene 12508                 | <i>Gm10913</i> ///               | 1,31121963 | 0,00157806 |
| /// predicted pseudogene 8210 /// 60s ribosomal                     | <i>gm12508</i> /// <i>gm8210</i> |            |            |
| protein l29-like /// 60s ribosomal protein l29-like ///             | <i>loc100503055</i> ///          |            |            |
| ribosomal protein l29                                               | <i>loc102642233</i> ///          |            |            |
|                                                                     | <i>rpl29</i>                     |            |            |
| Nrde-2 necessary for rna interference, domain containing            | <i>Nrde2</i>                     | 1,31093039 | 0,00237451 |
| Midasin homolog (yeast)                                             | <i>Mdn1</i>                      | 1,3108304  | 0,00589619 |
| Predicted pseudogene 4024 /// transmembrane                         | <i>Gm4024</i> /// <i>tmed10</i>  | 1,31019259 | 0,00445772 |
| emp24-like trafficking protein 10 (yeast)                           |                                  |            |            |
| Mitochondrial ribosomal protein l19                                 | <i>Mrpl19</i>                    | 1,31010358 | 0,00243102 |
| Atp synthase, h+ transporting, mitochondrial f0 complex, subunit b1 | <i>Atp5f1</i>                    | 1,30987497 | 0,00147043 |
| Charged multivesicular body protein 5                               | <i>Chmp5</i>                     | 1,30975186 | 0,00331761 |
| Zinc finger and btb domain containing 2                             | <i>Zbtb2</i>                     | 1,30761014 | 0,00257969 |

|                                                                                                                           |                                                         |            |            |
|---------------------------------------------------------------------------------------------------------------------------|---------------------------------------------------------|------------|------------|
| Autophagy related 4b, cysteine peptidase                                                                                  | <i>Atg4b</i>                                            | 1,30691541 | 0,00236225 |
| Leucine rich repeat containing 2                                                                                          | <i>Lrrc2</i>                                            | 1,30668406 | 0,00839668 |
| Haloacid dehalogenase-like hydrolase domain containing 3                                                                  | <i>Hdh3</i>                                             | 1,30667513 | 0,00577514 |
| Catenin (cadherin associated protein), beta 1                                                                             | <i>Ctnnb1</i>                                           | 1,3062004  | 0,00660416 |
| Ribosomal l1 domain containing 1                                                                                          | <i>Rsl1d1</i>                                           | 1,30555532 | 0,00392701 |
| Riken cdna 2900097c17 gene                                                                                                | <i>2900097c17rik</i>                                    | 1,3053543  | 0,00087703 |
| Lon peptidase 1, mitochondrial                                                                                            | <i>Lonp1</i>                                            | 1,30435038 | 0,00557272 |
| T-box 15                                                                                                                  | <i>Tbx15</i>                                            | 1,30423841 | 0,0044755  |
| Acyl-coenzyme a dehydrogenase, very long chain                                                                            | <i>Acadvl</i>                                           | 1,30410098 | 0,00415926 |
| Poly(a)-specific ribonuclease (deadenylation nuclease)                                                                    | <i>Parn</i>                                             | 1,30384167 | 0,00275905 |
| Protein phosphatase 2 (formerly 2a), regulatory subunit b", delta                                                         | <i>Ppp2r3d</i>                                          | 1,30376274 | 0,0077299  |
| Mediator complex subunit 25                                                                                               | <i>Med25</i>                                            | 1,30373901 | 0,00785176 |
| Nad(p)h dehydrogenase, quinone 1                                                                                          | <i>Nqo1</i>                                             | 1,30283513 | 0,00246621 |
| Smt3 suppressor of mif two 3 homolog 1 (yeast)                                                                            | <i>Sumo1</i>                                            | 1,30235527 | 0,00111027 |
| N-terminal asn amidase                                                                                                    | <i>Ntan1</i>                                            | 1,30181727 | 0,00696034 |
| Atpase, h+ transporting, lysosomal v0 subunit a2                                                                          | <i>Atp6v0a2</i>                                         | 1,30163351 | 0,00321351 |
| Suppressor of variegation 3-9 homolog 2 (drosophila)                                                                      | <i>Suv39h2</i>                                          | 1,30146981 | 0,00292661 |
| Gene rich cluster, c10 gene                                                                                               | <i>Grcc10</i>                                           | 1,30139597 | 0,00422972 |
| Glial cell line derived neurotrophic factor                                                                               | <i>Gdnf</i>                                             | 1,30100633 | 0,00144965 |
| Phd finger protein 13                                                                                                     | <i>Phf13</i>                                            | 1,30080819 | 0,00279617 |
| Zinc finger protein 623                                                                                                   | <i>Zfp623</i>                                           | 1,29992666 | 0,00322537 |
| Serine palmitoyltransferase, long chain base subunit 2                                                                    | <i>Sptlc2</i>                                           | 1,29919894 | 0,0036052  |
| Ring finger and wd repeat domain 2                                                                                        | <i>Rfwd2</i>                                            | 1,29912006 | 0,00276416 |
| Tetratricopeptide repeat domain 39c                                                                                       | <i>Ttc39c</i>                                           | 1,29869361 | 0,0033647  |
| Serine/arginine-rich splicing factor 6                                                                                    | <i>Srsf6</i>                                            | 1,29868439 | 0,00336526 |
| Dnaj (hsp40) homolog, subfamily b, member 4                                                                               | <i>Dnajb4</i>                                           | 1,29837026 | 0,00609195 |
| Ankyrin repeat domain 24                                                                                                  | <i>Ankrd24</i>                                          | 1,29831723 | 0,00663128 |
| Smek homolog 2, suppressor of mek1 (dictyostelium)                                                                        | <i>Smek2</i>                                            | 1,2982152  | 0,00453693 |
| Predicted gene 15483 /// 40s ribosomal protein s13-like /// ribosomal protein s13 /// ribosomal protein s13, pseudogene 4 | <i>Gm15483 /// loc102642137 /// rps13 /// rps13-ps4</i> | 1,29814073 | 0,00173715 |
| Succinyl-coa glutarate-coa transferase                                                                                    | <i>Sugct</i>                                            | 1,29754042 | 0,00402368 |

|                                                                                                               |                                                  |            |            |
|---------------------------------------------------------------------------------------------------------------|--------------------------------------------------|------------|------------|
| Proline, glutamic acid and leucine rich protein 1                                                             | <i>Pelp1</i>                                     | 1,29747701 | 0,00757378 |
| Shisa homolog 5 (xenopus laevis)                                                                              | <i>Shisa5</i>                                    | 1,29714865 | 0,00140663 |
| Riken cdna 2600001m11 gene /// nudix (nucleoside diphosphate linked moiety x)-type motif 5                    | <i>2600001m11rik /// nudt5</i>                   | 1,29691913 | 0,00630771 |
| Coiled-coil domain containing 50                                                                              | <i>Ccdc50</i>                                    | 1,29614873 | 0,00168846 |
| Oxysterol binding protein-like 2                                                                              | <i>Osbp12</i>                                    | 1,29599091 | 0,00184756 |
| Serine (or cysteine) peptidase inhibitor, clade d, member 1                                                   | <i>Serpind1</i>                                  | 1,29560365 | 0,00165171 |
| Apoptosis enhancing nuclease                                                                                  | <i>Aen</i>                                       | 1,295433   | 0,00760943 |
| Heterogeneous nuclear ribonucleoprotein a3 pseudogene /// heterogeneous nuclear ribonucleoprotein a3          | <i>Gm6793 /// hnrnpa3</i>                        | 1,29522663 | 0,00282018 |
| Integral membrane protein 2c                                                                                  | <i>Itm2c</i>                                     | 1,29491563 | 0,00404609 |
| Mannosidase, alpha, class 1a, member 2                                                                        | <i>Man1a2</i>                                    | 1,29458483 | 0,00555567 |
| Nudix (nucleoside diphosphate linked moiety x)-type motif 19                                                  | <i>Nudt19</i>                                    | 1,29439987 | 0,00210643 |
| Bola-like 2 (e. Coli)                                                                                         | <i>Bola2</i>                                     | 1,29427614 | 0,00604758 |
| Digeorge syndrome critical region gene 14                                                                     | <i>Dgcr14</i>                                    | 1,29321654 | 0,00799805 |
| Transmembrane emp24 domain containing 3                                                                       | <i>Tmed3</i>                                     | 1,29318344 | 0,00197423 |
| Atp synthase, h+ transporting, mitochondrial f0 complex, subunit s                                            | <i>Atp5s</i>                                     | 1,29158664 | 0,00447937 |
| Coiled-coil domain containing 23                                                                              | <i>Ccdc23</i>                                    | 1,29143385 | 0,00118179 |
| Predicted pseudogene 6238 /// mitochondrial ribosomal protein l30                                             | <i>Gm6238 /// mrpl30</i>                         | 1,29130468 | 0,00251601 |
| Ketohexokinase                                                                                                | <i>Khk</i>                                       | 1,29088678 | 0,00859242 |
| Trypsin domain containing 1                                                                                   | <i>Tysnd1</i>                                    | 1,29075301 | 0,00636516 |
| Mechanistic target of rapamycin (serine/threonine kinase)                                                     | <i>Mtor</i>                                      | 1,28996695 | 0,00872072 |
| Sh2 domain protein 1b1 /// sh2 domain protein 1b2                                                             | <i>Sh2d1b1 /// sh2d1b2</i>                       | 1,28968046 | 0,00907893 |
| Predicted gene 4705 /// predicted gene 6404 /// ribosomal protein l34 /// ribosomal protein l34, pseudogene 1 | <i>Gm4705 /// gm6404 /// rpl34 /// rpl34-ps1</i> | 1,28905394 | 0,00279933 |
| Retinoic acid induced 1                                                                                       | <i>Rai1</i>                                      | 1,28903642 | 0,00562609 |
| Stromal cell derived factor 2                                                                                 | <i>Sdf2</i>                                      | 1,28875605 | 0,00433927 |
| Mitogen-activated protein kinase kinase 5                                                                     | <i>Map2k5</i>                                    | 1,28869391 | 0,00629459 |
| Dehydrogenase/reductase (sdr family) member 7                                                                 | <i>Dhrs7</i>                                     | 1,28864819 | 0,00380244 |
| Suppression of tumorigenicity 7-like                                                                          | <i>St7l</i>                                      | 1,28822825 | 0,00679931 |
| Predicted gene 3258 /// suppressor of ty 4a                                                                   | <i>Gm3258 /// supt4a</i>                         | 1,28780112 | 0,00202726 |

|                                                           |                             |            |            |
|-----------------------------------------------------------|-----------------------------|------------|------------|
| Mediator complex subunit 31                               | <i>Med31</i>                | 1,28735245 | 0,00765435 |
| Asparaginase like 1                                       | <i>Asrgl1</i>               | 1,28702632 | 0,00588691 |
| Grpe-like 1, mitochondrial                                | <i>Grpel1</i>               | 1,28696046 | 0,00244918 |
| Lysine (k)-specific demethylase 4c                        | <i>Kdm4c</i>                | 1,28685735 | 0,0034812  |
| Serologically defined colon cancer antigen 3              | <i>Sdccag3</i>              | 1,28644843 | 0,00437688 |
| Regulator of microtubule dynamics 1                       | <i>Rmdn1</i>                | 1,28625069 | 0,00824927 |
| Peroxisomal biogenesis factor 14                          | <i>Pex14</i>                | 1,28613076 | 0,00609537 |
| Perilipin 2                                               | <i>Plin2</i>                | 1,28611306 | 0,00174965 |
| Hcls1 binding protein 3                                   | <i>Hs1bp3</i>               | 1,28590844 | 0,00434701 |
| Glucosamine-6-phosphate deaminase 1                       | <i>Gnpda1</i>               | 1,28515553 | 0,00397039 |
| Suppressor of cytokine signaling 3                        | <i>Socs3</i>                | 1,28500155 | 0,00593663 |
| Protein kinase c and casein kinase substrate in neurons 3 | <i>Pacsin3</i>              | 1,28478347 | 0,00315291 |
| Zinc finger, ccch-type with g patch domain                | <i>Zgpat</i>                | 1,28460648 | 0,00243075 |
| Activating transcription factor 2                         | <i>Atf2</i>                 | 1,28451922 | 0,00247977 |
| Complement component factor h                             | <i>Cfh</i>                  | 1,28448752 | 0,00378658 |
| Autophagy related 101                                     | <i>Atg101</i>               | 1,28408528 | 0,00704237 |
| Aquarius                                                  | <i>Aqr</i>                  | 1,28386916 | 0,00269146 |
| Nucleolar and coiled-body phosphoprotein 1                | <i>Nolc1</i>                | 1,28386764 | 0,00486256 |
| Archaeysin family metallopeptidase 2                      | <i>Amz2</i>                 | 1,28305864 | 0,00331808 |
| Endoglin                                                  | <i>Eng</i>                  | 1,28213291 | 0,00562412 |
| Nadh dehydrogenase (ubiquinone) flavoprotein 1            | <i>Ndufv1</i>               | 1,28211377 | 0,00928935 |
| Predicted pseudogene 10913 /// predicted gene 11449       | <i>Gm10913 ///</i>          | 1,28205984 | 0,00130387 |
| /// predicted gene 12508 /// predicted gene 13213 ///     | <i>gm11449 ///</i>          |            |            |
| predicted pseudogene 8210 /// 60s ribosomal protein       | <i>gm12508 ///</i>          |            |            |
| l29-like /// 60s ribosomal protein l29-like ///           | <i>gm13213 ///</i>          |            |            |
| ribosomal protein l29                                     | <i>gm8210 ///</i>           |            |            |
|                                                           | <i>/// loc100503055 ///</i> |            |            |
|                                                           | <i>loc102642233 ///</i>     |            |            |
|                                                           | <i>rpl29</i>                |            |            |
| Adnp homeobox 2                                           | <i>Adnp2</i>                | 1,28195435 | 0,00552804 |
| Cd2 antigen (cytoplasmic tail) binding protein 2          | <i>Cd2bp2</i>               | 1,28161226 | 0,00185621 |
| Sumo/sentrin specific peptidase 3                         | <i>Senp3</i>                | 1,27952714 | 0,00495453 |
| Inositol polyphosphate phosphatase-like 1                 | <i>Inpp1</i>                | 1,27871777 | 0,00726507 |
| Polysaccharide biosynthesis domain containing 1           | <i>Pbdc1</i>                | 1,27859763 | 0,00197579 |
| Trafficking protein particle complex 12                   | <i>Trappc12</i>             | 1,27855446 | 0,00196601 |
| Glutaminyl-trna synthetase                                | <i>Qars</i>                 | 1,27835869 | 0,00171886 |
| Serine/arginine-rich protein specific kinase 2            | <i>Srpk2</i>                | 1,27789505 | 0,00404603 |
| Charged multivesicular body protein 7                     | <i>Chmp7</i>                | 1,27769662 | 0,00515954 |

|                                                                                  |                       |            |            |
|----------------------------------------------------------------------------------|-----------------------|------------|------------|
| Far upstream element (fuse) binding protein 1                                    | <i>Fubp1</i>          | 1,27652452 | 0,00627459 |
| General transcription factor iiic, polypeptide 6, alpha                          | <i>Gtf3c6</i>         | 1,27612644 | 0,00841383 |
| Ubiquitin pseudogene /// ubiquitin b                                             | <i>Gm1821 /// ubb</i> | 1,27605357 | 0,00128034 |
| Nadh dehydrogenase (ubiquinone) 1, subcomplex unknown, 1                         | <i>Ndufc1</i>         | 1,27528551 | 0,00558873 |
| Ubiquitin-fold modifier 1                                                        | <i>Ufm1</i>           | 1,2740525  | 0,00904432 |
| Thioredoxin-like 4a                                                              | <i>Txn14a</i>         | 1,27395574 | 0,0069058  |
| Protein tyrosine phosphatase, receptor type, a                                   | <i>Ptpa</i>           | 1,27329301 | 0,00766852 |
| Er degradation enhancer, mannosidase alpha-like 2                                | <i>Edem2</i>          | 1,27311189 | 0,00871834 |
| Deoxyhypusine synthase                                                           | <i>Dhps</i>           | 1,27283255 | 0,00317671 |
| Nmd3 homolog (s. Cerevisiae)                                                     | <i>Nmd3</i>           | 1,27272837 | 0,00265942 |
| Pyruvate dehydrogenase e1 alpha 1                                                | <i>Pdha1</i>          | 1,26960471 | 0,00928689 |
| Cyclin d2                                                                        | <i>Ccnd2</i>          | 1,26959276 | 0,00293086 |
| Karyopherin (importin) alpha 4                                                   | <i>Kpna4</i>          | 1,26938552 | 0,00889584 |
| Protein arginine n-methyltransferase 1                                           | <i>Prmt1</i>          | 1,26933688 | 0,00404118 |
| Smu-1 suppressor of mec-8 and unc-52 homolog (c. Elegans)                        | <i>Smu1</i>           | 1,26881284 | 0,00243727 |
| Peptidase (mitochondrial processing) alpha                                       | <i>Pmpca</i>          | 1,26850572 | 0,00219738 |
| Adp-ribosylarginine hydrolase                                                    | <i>Adprh</i>          | 1,2682769  | 0,00226074 |
| V-myc myelocytomatosis viral related oncogene, neuroblastoma derived (avian)     | <i>Mycn</i>           | 1,26794892 | 0,00735966 |
| Aldo-keto reductase family 1, member c12                                         | <i>Akr1c12</i>        | 1,26771613 | 0,00536704 |
| Tripartite motif-containing 33                                                   | <i>Trim33</i>         | 1,26751168 | 0,00388256 |
| Ring finger protein 25                                                           | <i>Rnf25</i>          | 1,26696372 | 0,00547938 |
| Acyl-coa thioesterase 9                                                          | <i>Acot9</i>          | 1,26658607 | 0,00279367 |
| Ccr4-not transcription complex, subunit 8                                        | <i>Cnot8</i>          | 1,26651858 | 0,0048778  |
| Set and mynd domain containing 5                                                 | <i>Smyd5</i>          | 1,26633746 | 0,00370742 |
| Topoisomerase (dna) iii beta                                                     | <i>Top3b</i>          | 1,26618008 | 0,00534191 |
| Nadh dehydrogenase (ubiquinone) 1 beta subcomplex, 6                             | <i>Ndufb6</i>         | 1,26599341 | 0,00919588 |
| General transcription factor iiic, polypeptide 4                                 | <i>Gtf3c4</i>         | 1,26572056 | 0,006999   |
| Adp-ribosylation factor-like 5a                                                  | <i>Arl5a</i>          | 1,26559053 | 0,00295627 |
| Myo-inositol 1-phosphate synthase a1                                             | <i>Isyna1</i>         | 1,26543168 | 0,00392362 |
| Heat shock protein 8                                                             | <i>Hspb8</i>          | 1,26433066 | 0,00242546 |
| Seminal vesicle secretory protein 5                                              | <i>Svs5</i>           | 1,26426383 | 0,00716981 |
| Small nucleolar rna host gene 1                                                  | <i>Snhg1</i>          | 1,26342423 | 0,00527165 |
| Dihydrolipoamide s-succinyltransferase (e2 component of 2-oxo-glutarate complex) | <i>Dlst</i>           | 1,26334517 | 0,00534191 |

|                                                                                                                                      |                                                             |            |            |
|--------------------------------------------------------------------------------------------------------------------------------------|-------------------------------------------------------------|------------|------------|
| Eukaryotic translation initiation factor 4e                                                                                          | <i>Eif4e</i>                                                | 1,26324927 | 0,00501542 |
| Predicted gene 16340 /// interferon activated gene 203 /// flocculation protein flo11-like /// interferon-activable protein 203-like | <i>Gm16340 /// ifi203 /// loc100862473 /// loc102641031</i> | 1,26314866 | 0,00905442 |
| Apoptosis inhibitor 5                                                                                                                | <i>Api5</i>                                                 | 1,26312198 | 0,00310377 |
| Predicted gene 10349 /// predicted pseudogene 9386 /// nuclear transport factor 2 /// nuclear transport factor 2, pseudogene 1       | <i>Gm10349 /// gm9386 /// nutf2 /// nutf2-ps1</i>           | 1,26295615 | 0,00663325 |
| Riken cdna 1110059g10 gene                                                                                                           | <i>1110059g10rik</i>                                        | 1,26283949 | 0,00208592 |
| Growth arrest specific 1                                                                                                             | <i>Gas1</i>                                                 | 1,2619253  | 0,00432707 |
| Mitochondrial ribosomal protein s22                                                                                                  | <i>Mrps22</i>                                               | 1,26101167 | 0,00721126 |
| Tumor suppressing subtransferable candidate 1                                                                                        | <i>Tssc1</i>                                                | 1,25971773 | 0,00425834 |
| Sirtuin 3                                                                                                                            | <i>Sirt3</i>                                                | 1,25969915 | 0,00450913 |
| Zinc finger protein 319                                                                                                              | <i>Zfp319</i>                                               | 1,25958452 | 0,00583585 |
| Ras-related protein-1a                                                                                                               | <i>Rap1a</i>                                                | 1,25888829 | 0,00749589 |
| Actinin, alpha 1                                                                                                                     | <i>Actn1</i>                                                | 1,25839753 | 0,00409827 |
| Filamin, alpha                                                                                                                       | <i>Flna</i>                                                 | 1,25839212 | 0,00557115 |
| Aminopeptidase-like 1                                                                                                                | <i>Npepl1</i>                                               | 1,25824696 | 0,0045286  |
| Moesin                                                                                                                               | <i>Msn</i>                                                  | 1,25820399 | 0,00673293 |
| Late endosomal/lysosomal adaptor, mapk and mtor activator 5                                                                          | <i>Lamtor5</i>                                              | 1,2579041  | 0,00347187 |
| U box domain containing 5                                                                                                            | <i>Ubox5</i>                                                | 1,25765684 | 0,00497456 |
| Riken cdna 1110051m20 gene                                                                                                           | <i>1110051m20rik</i>                                        | 1,25719386 | 0,00437615 |
| Ribosomal protein l12                                                                                                                | <i>Rpl12</i>                                                | 1,25601562 | 0,00732606 |
| Rna binding motif protein 17                                                                                                         | <i>Rbm17</i>                                                | 1,2551658  | 0,00362873 |
| Exostoses (multiple) 1                                                                                                               | <i>Ext1</i>                                                 | 1,25499983 | 0,00548599 |
| Proteasome (prosome, macropain) subunit, beta type 5                                                                                 | <i>Psmb5</i>                                                | 1,25494679 | 0,00368154 |
| Ep300 interacting inhibitor of differentiation 1                                                                                     | <i>Eid1</i>                                                 | 1,25458968 | 0,00692395 |
| Solute carrier family 23 (nucleobase transporters), member 2                                                                         | <i>Slc23a2</i>                                              | 1,25433956 | 0,00837017 |
| Interactor of little elongation complex ell subunit 1                                                                                | <i>Ice1</i>                                                 | 1,25423303 | 0,00985702 |
| Ero1-like beta (s. Cerevisiae)                                                                                                       | <i>Ero1lb</i>                                               | 1,25377305 | 0,00449424 |
| Bleomycin hydrolase                                                                                                                  | <i>Blmh</i>                                                 | 1,25287171 | 0,00896318 |
| Glycerol-3-phosphate acyltransferase, mitochondrial                                                                                  | <i>Gpam</i>                                                 | 1,25280786 | 0,00766459 |
| Atp synthase, h+ transporting, mitochondrial f1 complex, alpha subunit 1                                                             | <i>Atp5a1</i>                                               | 1,25253473 | 0,00216188 |
| Atp synthase, h+ transporting, mitochondrial f1                                                                                      | <i>Atp5c1</i>                                               | 1,25222143 | 0,00563636 |

|                                                                       |                         |            |            |
|-----------------------------------------------------------------------|-------------------------|------------|------------|
| complex, gamma polypeptide 1                                          |                         |            |            |
| Set domain containing 3                                               | <i>Setd3</i>            | 1,25204058 | 0,0033832  |
| Mediator complex subunit 17                                           | <i>Med17</i>            | 1,25196967 | 0,00661655 |
| Serum amyloid a-like 1                                                | <i>Saal1</i>            | 1,25155551 | 0,00894522 |
| Nitrogen permease regulator-like 2                                    | <i>Nprl2</i>            | 1,25132838 | 0,00998376 |
| Potassium channel tetramerisation domain<br>containing 5              | <i>Kctd5</i>            | 1,25131679 | 0,00727452 |
| Chromodomain helicase dna binding protein 1                           | <i>Chd1</i>             | 1,2510701  | 0,00770132 |
| Receptor (tnfrsf)-interacting serine-threonine kinase<br>1            | <i>Ripk1</i>            | 1,25049007 | 0,00828813 |
| Syntrophin, acidic 1                                                  | <i>Snta1</i>            | 1,25047908 | 0,00493576 |
| N-ethylmaleimide sensitive fusion protein<br>attachment protein gamma | <i>Napg</i>             | 1,25017678 | 0,00559407 |
| Phosphatidylinositol-4-phosphate 5-kinase, type 1<br>alpha            | <i>Pip5k1a</i>          | 1,25011042 | 0,00814442 |
| Integral membrane protein 2b                                          | <i>Itm2b</i>            | 1,2497418  | 0,00578719 |
| Stip1 homology and u-box containing protein 1                         | <i>Stub1</i>            | 1,24973162 | 0,00493827 |
| Serum response factor                                                 | <i>Srf</i>              | 1,24951341 | 0,00541439 |
| Myotubularin related protein 9                                        | <i>Mtmr9</i>            | 1,24904884 | 0,00599541 |
| Mterf domain containing 1                                             | <i>Mterfd1</i>          | 1,24850827 | 0,00789642 |
| Grancalcin                                                            | <i>Gca</i>              | 1,24813404 | 0,00954046 |
| 60s ribosomal protein l12-like /// uncharacterized                    | <i>Loc102635048 ///</i> | 1,24811127 | 0,00236549 |
| loc102635609 /// 60s ribosomal protein l12-like ///                   | <i>loc102635609 ///</i> |            |            |
| ribosomal protein l12                                                 | <i>loc102640707 ///</i> |            |            |
|                                                                       | <i>rpl12</i>            |            |            |
| Procollagen-lysine, 2-oxoglutarate 5-dioxygenase 1                    | <i>Plod1</i>            | 1,2467632  | 0,00835563 |
| Ubx domain protein 6                                                  | <i>Ubxn6</i>            | 1,24649378 | 0,00563527 |
| Cyclin-dependent kinase 8                                             | <i>Cdk8</i>             | 1,24625926 | 0,00667898 |
| Mitochondrial ribosomal protein s26                                   | <i>Mrps26</i>           | 1,24535076 | 0,00428664 |
| Iscu iron-sulfur cluster scaffold homolog (e. Coli)                   | <i>Iscu</i>             | 1,24515673 | 0,00500222 |
| Cap methyltransferase 1                                               | <i>Cmtr1</i>            | 1,2451115  | 0,00419103 |
| Aconitase 1                                                           | <i>Aco1</i>             | 1,24443581 | 0,00766757 |
| Crystallin, alpha b                                                   | <i>Cryab</i>            | 1,24431799 | 0,00847789 |
| Niemann-pick type c1                                                  | <i>Npc1</i>             | 1,24413217 | 0,00977387 |
| Ftsj homolog 3 (e. Coli)                                              | <i>Ftsj3</i>            | 1,24400339 | 0,00712895 |
| Decapping enzyme, scavenger                                           | <i>Dcps</i>             | 1,24369073 | 0,00464106 |
| Copine iii                                                            | <i>Cpne3</i>            | 1,2424283  | 0,00487395 |
| Microsomal glutathione s-transferase 1                                | <i>Mgst1</i>            | 1,24170235 | 0,00596145 |

|                                                                                                                                                                                             |                                               |            |            |
|---------------------------------------------------------------------------------------------------------------------------------------------------------------------------------------------|-----------------------------------------------|------------|------------|
| Threonyl-trna synthetase                                                                                                                                                                    | <i>Tars</i>                                   | 1,24163665 | 0,00347187 |
| Bcdin3 domain containing                                                                                                                                                                    | <i>Bcdin3d</i>                                | 1,24163011 | 0,00792987 |
| Pyridoxal-dependent decarboxylase domain containing 1                                                                                                                                       | <i>Pdxdc1</i>                                 | 1,24093899 | 0,00525021 |
| Phosphoglucosyltransferase 2                                                                                                                                                                | <i>Pgm2</i>                                   | 1,24072675 | 0,00503287 |
| 60s ribosomal protein l12-like /// ribosomal protein l12                                                                                                                                    | <i>Loc102635048 /// rpl12</i>                 | 1,24036336 | 0,00646379 |
| Zinc finger, mynd domain containing 19                                                                                                                                                      | <i>Zmynd19</i>                                | 1,23994729 | 0,00372728 |
| Rabaptin, rab gtpase binding effector protein 1                                                                                                                                             | <i>Rabep1</i>                                 | 1,23978498 | 0,0051258  |
| F-box and wd-40 domain protein 2                                                                                                                                                            | <i>Fbxw2</i>                                  | 1,2388298  | 0,00444813 |
| Microtubule-associated protein 4                                                                                                                                                            | <i>Map4</i>                                   | 1,23877369 | 0,00857601 |
| Prp40 pre-mrna processing factor 40 homolog a (yeast)                                                                                                                                       | <i>Prpf40a</i>                                | 1,23834955 | 0,00773879 |
| ATPase, Na <sup>+</sup> /K <sup>+</sup> transporting, alpha 1 polypeptide                                                                                                                   | <i>Atp1a1</i>                                 | 1,23784391 | 0,00439604 |
| Au rna binding protein/enoyl-coenzyme a hydratase                                                                                                                                           | <i>Auh</i>                                    | 1,23759904 | 0,00754828 |
| Dynein cytoplasmic 1 intermediate chain 2                                                                                                                                                   | <i>Dync1i2</i>                                | 1,2375268  | 0,00413255 |
| Thyroid hormone receptor interactor 11                                                                                                                                                      | <i>Trip11</i>                                 | 1,23600078 | 0,00937722 |
| Ribosomal protein l14 /// ribosomal protein l14, pseudogene 1                                                                                                                               | <i>Rpl14 /// rpl14-ps1</i>                    | 1,23446651 | 0,00743297 |
| Acyl-coA thioesterase 10 /// acyl-coA thioesterase 9                                                                                                                                        | <i>Acot10 /// acot9</i>                       | 1,23416335 | 0,00471975 |
| Histidine triad nucleotide binding protein 1                                                                                                                                                | <i>Hint1</i>                                  | 1,23385037 | 0,00574229 |
| Ribosomal protein l7-like 1                                                                                                                                                                 | <i>Rpl7l1</i>                                 | 1,23298191 | 0,00479767 |
| Solute carrier family 35, member b2                                                                                                                                                         | <i>Slc35b2</i>                                | 1,23090419 | 0,00804123 |
| NADH dehydrogenase subunit 5                                                                                                                                                                | <i>Nd5</i>                                    | 1,22877484 | 0,00723211 |
| Transaldolase 1                                                                                                                                                                             | <i>Taldo1</i>                                 | 1,22821563 | 0,00746489 |
| Cdna sequence bc094435 /// ccr4 carbon catabolite repression 4-like (s. Cerevisiae) /// component of oligomeric golgi complex 6 /// sh3-domain grb2-like (endophilin) interacting protein 1 | <i>Bc094435 /// ccrn4l /// cog6 /// sgip1</i> | 1,22500268 | 0,00609447 |
| Eukaryotic translation initiation factor 3, subunit f                                                                                                                                       | <i>Eif3f</i>                                  | 1,22450815 | 0,00466856 |
| Predicted pseudogene 10051 /// ribosomal protein l28                                                                                                                                        | <i>Gm10051 /// rpl28</i>                      | 1,22355636 | 0,00698251 |
| DnaJ (hsp40) homolog, subfamily c, member 10                                                                                                                                                | <i>Dnajc10</i>                                | 1,22310492 | 0,00558055 |
| Anaphase promoting complex subunit 1                                                                                                                                                        | <i>Anapc1</i>                                 | 1,22261719 | 0,00876681 |
| Cdkn2a interacting protein n-terminal like                                                                                                                                                  | <i>Cdkn2aipnl</i>                             | 1,22222985 | 0,00545178 |
| Ribosomal protein l26 pseudogene /// ribosomal protein l26                                                                                                                                  | <i>Gm15772 /// rpl26</i>                      | 1,22185956 | 0,00450913 |
| Spastic paraplegia 21 homolog (human)                                                                                                                                                       | <i>Spg21</i>                                  | 1,2173007  | 0,00623352 |



| Milk fat globule-egf factor 8 protein                                                                                    | <i>Mfge8</i>                          | 1,21725721   | 0,00714958 |
|--------------------------------------------------------------------------------------------------------------------------|---------------------------------------|--------------|------------|
| Upstream transcription factor 1                                                                                          | <i>Usf1</i>                           | 1,21593776   | 0,00858677 |
| Protein kinase c, iota                                                                                                   | <i>Prkci</i>                          | 1,21459141   | 0,00766459 |
| Enabled homolog (drosophila)                                                                                             | <i>Enah</i>                           | 1,2143244    | 0,0082449  |
| Ras homolog enriched in brain                                                                                            | <i>Rheb</i>                           | 1,21399176   | 0,00985702 |
| Clptm1-like                                                                                                              | <i>Clptm1l</i>                        | 1,21147376   | 0,00986861 |
| Predicted gene 5621 /// ribosomal protein l10                                                                            | <i>Gm5621 /// rpl10</i>               | 1,20876146   | 0,00658493 |
| Mitochondrial ribosomal protein l37                                                                                      | <i>Mrpl37</i>                         | 1,20853579   | 0,00703218 |
| Vacuole membrane protein 1                                                                                               | <i>Vmp1</i>                           | 1,19816015   | 0,00862064 |
| Gene.title                                                                                                               | Gene.symbol                           | 2^logFC      | Adj.p.val  |
| Ribosomal protein l39-like                                                                                               | <i>Rpl39l</i>                         | -400,5481904 | 1,20e-12   |
| Solute carrier family 14 (urea transporter), member 1                                                                    | <i>Slc14a1</i>                        | -321,1120696 | 7,86e-13   |
| Cellular retinoic acid binding protein i                                                                                 | <i>Crabp1</i>                         | -216,5619959 | 4,42e-12   |
| Growth differentiation factor 10                                                                                         | <i>Gdf10</i>                          | -192,97278   | 7,59e-12   |
| Collagen, type i, alpha 2                                                                                                | <i>Col1a2</i>                         | -142,1145043 | 4,53e-11   |
| Dermatopontin                                                                                                            | <i>Dpt</i>                            | -133,548562  | 4,42e-12   |
| Dickkopf homolog 2 (xenopus laevis)                                                                                      | <i>Dkk2</i>                           | -111,9209627 | 8,21e-12   |
| Keratin 18                                                                                                               | <i>Krt18</i>                          | -74,34212582 | 1,39e-11   |
| Retinoic acid receptor responder (tazarotene induced) 2                                                                  | <i>Rarres2</i>                        | -72,66093304 | 4,42e-12   |
| Steroidogenic acute regulatory protein                                                                                   | <i>Star</i>                           | -72,03597655 | 1,30e-12   |
| Ribosomal protein s4-like                                                                                                | <i>Rps4l</i>                          | -69,51935064 | 3,13e-11   |
| Integrin, beta-like 1                                                                                                    | <i>Itgbl1</i>                         | -69,24566902 | 7,44e-11   |
| Insulin-like growth factor binding protein 6                                                                             | <i>Igfbp6</i>                         | -60,7465229  | 1,79e-11   |
| Sparc-like 1                                                                                                             | <i>Sparcl1</i>                        | -56,38569317 | 3,45e-11   |
| T-cell receptor beta-2 chain c region-like /// t cell receptor beta, joining region /// t cell receptor beta, variable 1 | <i>Loc665506 /// tcrb-j /// trbv1</i> | -52,37462236 | 2,39e-10   |
| T-cell receptor beta-2 chain c region-like                                                                               | <i>Loc665506</i>                      | -47,32007098 | 3,62e-11   |
| 24-dehydrocholesterol reductase                                                                                          | <i>Dhcr24</i>                         | -46,74936692 | 1,63e-11   |
| Udp-galnac:betaglnac beta 1,3-galactosaminyltransferase, polypeptide 1                                                   | <i>B3galnt1</i>                       | -45,54976344 | 2,06e-10   |
| Protein kinase c, beta                                                                                                   | <i>Prkcb</i>                          | -45,24078391 | 1,15e-11   |
| Hiv-1 tat interactive protein 2, homolog (human)                                                                         | <i>Htatip2</i>                        | -40,89403322 | 2,02e-10   |
| Platelet derived growth factor receptor, alpha polypeptide                                                               | <i>Pdgfra</i>                         | -38,84815134 | 4,23e-10   |
| Cd34 antigen                                                                                                             | <i>Cd34</i>                           | -34,46710621 | 1,02e-09   |
| Regulator of cell cycle                                                                                                  | <i>Rgcc</i>                           | -28,06528422 | 1,26e-09   |
| Cathepsin k                                                                                                              | <i>Ctsk</i>                           | -25,48921282 | 2,50e-10   |
| Mannose receptor, c type 2                                                                                               | <i>Mrc2</i>                           | -24,54813727 | 9,90e-11   |
| Phospholipase a2, group vii (platelet-activating factor acetylhydrolase, plasma)                                         | <i>Pla2g7</i>                         | -23,88831214 | 2,06e-10   |
| Dickkopf homolog 3 (xenopus laevis)                                                                                      | <i>Dkk3</i>                           | -23,69451917 | 7,67e-10   |
| Twist basic helix-loop-helix transcription factor 2                                                                      | <i>Twist2</i>                         | -21,64706034 | 1,86e-10   |
| T-box 20                                                                                                                 | <i>Tbx20</i>                          | -21,01140448 | 5,67e-09   |

|                                                                    |                      |              |          |
|--------------------------------------------------------------------|----------------------|--------------|----------|
| Enhancer trap locus 4                                              | <i>Etl4</i>          | -20,29084198 | 2,82e-10 |
| Fibroblast growth factor 13                                        | <i>Fgf13</i>         | -19,88860811 | 2,40e-09 |
| Isopentenyl-diphosphate delta isomerase                            | <i>Idi1</i>          | -18,94223506 | 9,76e-10 |
| Riken cdna 1810011o10 gene                                         | <i>1810011o10rik</i> | -18,63362293 | 5,01e-11 |
| Lymphocyte antigen 6 complex, locus a                              | <i>Ly6a</i>          | -18,02874992 | 1,69e-11 |
| Transforming growth factor, beta induced                           | <i>Tgfb1</i>         | -17,68355238 | 8,76e-11 |
| Phosphodiesterase 8a                                               | <i>Pde8a</i>         | -15,93958332 | 2,40e-10 |
| Cadherin 11                                                        | <i>Cdh11</i>         | -15,57801226 | 7,56e-08 |
| Bone morphogenetic protein 2                                       | <i>Bmp2</i>          | -14,74115989 | 1,47e-09 |
| Homeobox a11                                                       | <i>Hoxa11</i>        | -14,7409036  | 4,50e-07 |
| Immunoglobulin superfamily, member 5                               | <i>Igsf5</i>         | -14,49456825 | 2,18e-07 |
| Fibulin 5                                                          | <i>Fbln5</i>         | -14,48538399 | 3,26e-09 |
| Receptor tyrosine kinase-like orphan receptor 2                    | <i>Ror2</i>          | -14,0048787  | 3,85e-10 |
| Interleukin 1 receptor-like 1                                      | <i>Il1rl1</i>        | -13,71960359 | 2,15e-09 |
| Family with sequence similarity 84, member a                       | <i>Fam84a</i>        | -13,68843273 | 8,00e-09 |
| Family with sequence similarity 198, member b                      | <i>Fam198b</i>       | -13,29773682 | 9,46e-09 |
| Sarcoglycan, epsilon                                               | <i>Sgce</i>          | -13,08567786 | 1,75e-09 |
| Inhibitor of dna binding 4                                         | <i>Id4</i>           | -12,99409284 | 8,49e-09 |
| Transient receptor potential cation channel, subfamily c, member 6 | <i>Trpc6</i>         | -12,70732337 | 1,25e-09 |
| Cell division cycle associated 7 like                              | <i>Cdca7l</i>        | -12,46830198 | 1,56e-08 |
| T cell receptor beta, joining region                               | <i>Tcrb-j</i>        | -12,21756544 | 1,54e-09 |
| Epiregulin                                                         | <i>Ereg</i>          | -12,06306865 | 4,14e-09 |
| Adrenomedullin                                                     | <i>Adm</i>           | -11,91748309 | 7,01e-09 |
| Ribonuclease p/mrp 25 subunit                                      | <i>Rpp25</i>         | -11,86044747 | 4,84e-08 |
| Plexin domain containing 1                                         | <i>Plxdc1</i>        | -11,79264505 | 9,24e-11 |
| Homeobox a11, opposite strand                                      | <i>Hoxa11os</i>      | -11,25743289 | 1,88e-09 |
| Myosin vb                                                          | <i>Myo5b</i>         | -11,15332895 | 1,09e-08 |
| R-spondin homolog (xenopus laevis)                                 | <i>Rspo1</i>         | -10,7644114  | 2,13e-07 |
| Collagen, type xviii, alpha 1                                      | <i>Col18a1</i>       | -10,75869485 | 1,86e-10 |
| Tetraspanin 2                                                      | <i>Tspan2</i>        | -10,74480104 | 5,92e-07 |
| Pleiomorphic adenoma gene-like 1                                   | <i>Plagl1</i>        | -10,40040376 | 5,38e-09 |
| Egl-9 family hypoxia-inducible factor 3                            | <i>Egln3</i>         | -10,17815125 | 4,20e-08 |
| Mediator complex subunit 12-like                                   | <i>Med12l</i>        | -10,11039423 | 7,95e-08 |
| S100 calcium binding protein a4                                    | <i>S100a4</i>        | -9,859360113 | 2,37e-10 |
| Cd1d1 antigen                                                      | <i>Cd1d1</i>         | -9,7232075   | 3,58e-09 |
| Betacellulin, epidermal growth factor family member                | <i>Btc</i>           | -9,697580818 | 9,75e-10 |
| Guanine nucleotide binding protein (g protein), gamma 4            | <i>Gng4</i>          | -9,666230337 | 5,50e-10 |
| St8 alpha-n-acetyl-neuraminide alpha-2,8-sialyltransferase 1       | <i>St8sia1</i>       | -9,404553957 | 1,36e-07 |
| Homeobox d9                                                        | <i>Hoxd9</i>         | -9,372529921 | 8,94e-09 |
| Calpain 6                                                          | <i>Capn6</i>         | -9,306057622 | 1,14e-08 |
| Homeobox d10                                                       | <i>Hoxd10</i>        | -9,084680342 | 1,47e-08 |
| Decorin                                                            | <i>Dcn</i>           | -9,038199933 | 5,99e-08 |

|                                                                                        |                                  |              |            |
|----------------------------------------------------------------------------------------|----------------------------------|--------------|------------|
| Spondin 2, extracellular matrix protein                                                | <i>Spon2</i>                     | -9,022340379 | 2,20e-09   |
| Map/microtubule affinity-regulating kinase 1                                           | <i>Mark1</i>                     | -8,798951824 | 2,01e-07   |
| Glutathione peroxidase 7                                                               | <i>Gpx7</i>                      | -8,569638963 | 2,14e-08   |
| Procollagen c-endopeptidase enhancer 2                                                 | <i>Pcolce2</i>                   | -8,529142513 | 2,80e-10   |
| Norrie disease (pseudoglioma) (human)                                                  | <i>Ndp</i>                       | -8,505119507 | 2,60e-09   |
| Sry (sex determining region y)-box 2                                                   | <i>Sox2</i>                      | -8,342027423 | 6,43e-10   |
| Pleiotrophin                                                                           | <i>Ptn</i>                       | -8,260657304 | 6,92e-10   |
| Nidogen 1                                                                              | <i>Nid1</i>                      | -8,162801235 | 2,61e-07   |
| Protein kinase, cgmp-dependent, type ii                                                | <i>Prkg2</i>                     | -8,11185278  | 3,34e-09   |
| Solute carrier family 8 (sodium/calcium exchanger), member 1                           | <i>Slc8a1</i>                    | -8,008996125 | 3,56e-08   |
| Hemochromatosis                                                                        | <i>Hfe</i>                       | -7,93700752  | 1,33e-09   |
| Echinoderm microtubule associated protein like 5                                       | <i>Eml5</i>                      | -7,902685392 | 4,83e-09   |
| Calcium/calmodulin-dependent protein kinase id                                         | <i>Camk1d</i>                    | -7,739057781 | 3,47e-08   |
| Cysteine and glycine-rich protein 2                                                    | <i>Csrp2</i>                     | -7,714788766 | 8,55e-10   |
| Cd9 antigen                                                                            | <i>Cd9</i>                       | -7,540784699 | 4,23e-10   |
| Forkhead box d1                                                                        | <i>Foxd1</i>                     | -7,286482854 | 6,44e-09   |
| Spindle and kinetochore associated complex subunit 1                                   | <i>Ska1</i>                      | -7,123906213 | 3,14e-09   |
| Murine tcr cbeta2 chain cdna. /// t cell receptor beta, joining region                 | <i>Tcr-beta chain /// tcrb-j</i> | -7,089580635 | 1,05e-08   |
| C-fos induced growth factor                                                            | <i>Fgf</i>                       | -6,842240673 | 1,42e-08   |
| Cd244 natural killer cell receptor 2b4                                                 | <i>Cd244</i>                     | -6,822514118 | 2,63e-06   |
| Gata binding protein 2                                                                 | <i>Gata2</i>                     | -6,808585121 | 1,78e-09   |
| Neuro-oncological ventral antigen 1                                                    | <i>Nova1</i>                     | -6,667628514 | 1,09e-08   |
| Max dimerization protein 3                                                             | <i>Mxd3</i>                      | -6,59240573  | 2,97e-09   |
| Sema domain, immunoglobulin domain (ig), short basic domain, secreted, (semaphorin) 3a | <i>Sema3a</i>                    | -6,45989867  | 1,13e-06   |
| Plasmacytoma expressed transcript 2                                                    | <i>Pet2</i>                      | -6,311566387 | 2,01e-07   |
| Secreted frizzled-related protein 2                                                    | <i>Sfrp2</i>                     | -6,29429014  | 4,26e-08   |
| Zw10 interactor                                                                        | <i>Zwint</i>                     | -6,185478502 | 4,26e-09   |
| Cytochrome p450, family 51                                                             | <i>Cyp51</i>                     | -6,092070341 | 5,09e-09   |
| T-box18                                                                                | <i>Tbx18</i>                     | -6,07032006  | 1,67e-06   |
| 3-hydroxy-3-methylglutaryl-coenzyme a synthase 1                                       | <i>Hmgcs1</i>                    | -6,048454109 | 2,77e-08   |
| Phytanoyl-coa hydroxylase interacting protein-like                                     | <i>Phyhipl</i>                   | -6,019849665 | 0,00011103 |
| Lysyl oxidase-like 3                                                                   | <i>Loxl3</i>                     | -5,937390529 | 1,85e-08   |
| Elovl family member 6, elongation of long chain fatty acids (yeast)                    | <i>Elovl6</i>                    | -5,881633406 | 2,44e-09   |
| Rna binding protein gene with multiple splicing                                        | <i>Rbpms</i>                     | -5,862267616 | 5,39e-07   |
| Synaptogyrin 1                                                                         | <i>Syngr1</i>                    | -5,836488867 | 1,28e-09   |
| Mevalonate (diphospho) decarboxylase                                                   | <i>Mvd</i>                       | -5,730996606 | 3,34e-08   |
| Cannabinoid receptor 1 (brain)                                                         | <i>Cnr1</i>                      | -5,675768578 | 1,56e-07   |
| Cysteine-rich protein 1 (intestinal)                                                   | <i>Crip1</i>                     | -5,671672276 | 3,67e-08   |
| Phorbol-12-myristate-13-acetate-induced protein 1                                      | <i>Pmaip1</i>                    | -5,660690013 | 5,67e-06   |
| Teneurin transmembrane protein 3                                                       | <i>Tenm3</i>                     | -5,620193711 | 1,48e-06   |
| Arylsulfatase i                                                                        | <i>Arsi</i>                      | -5,571430594 | 7,01e-09   |
| Hepatocyte growth factor                                                               | <i>Hgf</i>                       | -5,483273239 | 8,26e-06   |

|                                                                                  |                              |              |            |
|----------------------------------------------------------------------------------|------------------------------|--------------|------------|
| Fms-like tyrosine kinase 1                                                       | <i>Flt1</i>                  | -5,432922266 | 5,39e-07   |
| Farnesyl diphosphate synthetase                                                  | <i>Fdps</i>                  | -5,328946575 | 5,38e-09   |
| Hydroxyacid oxidase 1, liver                                                     | <i>Hao1</i>                  | -5,274984472 | 1,72e-06   |
| Meiosis 1 associated protein                                                     | <i>M1ap</i>                  | -5,270928691 | 2,70e-08   |
| Myosin 1h                                                                        | <i>Myo1h</i>                 | -5,226923822 | 0,00894691 |
| Acetyl-coenzyme a acetyltransferase 2                                            | <i>Acat2</i>                 | -5,20432886  | 1,36e-09   |
| Collagen, type vi, alpha 3                                                       | <i>Col6a3</i>                | -5,194262    | 5,09e-09   |
| Sam and sh3 domain containing 1                                                  | <i>Sash1</i>                 | -5,155006359 | 9,52e-09   |
| Stearoyl-coenzyme a desaturase 1                                                 | <i>Scd1</i>                  | -5,150018711 | 2,07e-07   |
| Raftlin family member 2                                                          | <i>Rftn2</i>                 | -5,102439239 | 1,70e-08   |
| Matrilin 2                                                                       | <i>Matn2</i>                 | -5,022511747 | 1,98e-07   |
| Sorting nexin 6                                                                  | <i>Snx6</i>                  | -4,952573507 | 1,24e-07   |
| Fibroblast growth factor 10                                                      | <i>Fgf10</i>                 | -4,937630467 | 6,84e-06   |
| Methyltransferase like 7a1 /// methyltransferase like 7a2                        | <i>Mettl7a1 /// mettl7a2</i> | -4,900947799 | 6,11e-08   |
| Cd244 natural killer cell receptor 2b4 /// natural killer cell receptor 2b4-like | <i>Cd244 /// loc677008</i>   | -4,853000947 | 8,95e-07   |
| Leprecan-like 2                                                                  | <i>Leprel2</i>               | -4,78343056  | 1,26e-06   |
| Protein tyrosine phosphatase, non-receptor type 13                               | <i>Ptpn13</i>                | -4,760209631 | 3,08e-06   |
| Transforming growth factor alpha                                                 | <i>Tgfa</i>                  | -4,753554497 | 4,49e-06   |
| Keratin 13                                                                       | <i>Krt13</i>                 | -4,720649949 | 3,19e-07   |
| Heat shock protein 1b                                                            | <i>Hspa1b</i>                | -4,704320095 | 1,13e-06   |
| Family with sequence similarity 117, member a                                    | <i>Fam117a</i>               | -4,695198419 | 1,27e-06   |
| Runt-related transcription factor 1; translocated to, 1 (cyclin d-related)       | <i>Runx1t1</i>               | -4,66133348  | 2,12e-06   |
| Chemokine (c-c motif) ligand 8                                                   | <i>Ccl8</i>                  | -4,647990398 | 9,26e-09   |
| Methyltransferase like 7a1                                                       | <i>Mettl7a1</i>              | -4,623290306 | 3,16e-08   |
| Phosphoglycerate mutase 2                                                        | <i>Pgam2</i>                 | -4,580461574 | 5,53e-08   |
| Slit homolog 2 (drosophila)                                                      | <i>Slit2</i>                 | -4,578395443 | 2,33e-06   |
| Sparc/osteonectin, cwcv and kazal-like domains proteoglycan 3                    | <i>Spock3</i>                | -4,568666098 | 9,02e-06   |
| Centriole, cilia and spindle associated protein                                  | <i>Ccsap</i>                 | -4,513438104 | 1,92e-08   |
| Chondroitin sulfate n-acetylgalactosaminyltransferase 1                          | <i>Csgalnact1</i>            | -4,51310407  | 1,19e-08   |
| Arylsulfatase a                                                                  | <i>Arsa</i>                  | -4,510103448 | 5,67e-09   |
| Pituitary tumor-transforming 1 interacting protein                               | <i>Pttg1ip</i>               | -4,464308094 | 0,00540013 |
| Fxyd domain-containing ion transport regulator 6                                 | <i>Fxyd6</i>                 | -4,459267692 | 1,25e-07   |
| Calponin 2                                                                       | <i>Cnn2</i>                  | -4,414845556 | 5,80e-08   |
| 5'-nucleotidase domain containing 2                                              | <i>Nt5dc2</i>                | -4,386839026 | 5,27e-08   |
| Carbohydrate sulfotransferase 11 /// phosphatase and actin regulator 1           | <i>Chst11 /// phacr1</i>     | -4,386755669 | 5,11e-08   |
| Sh3/ankyrin domain gene 3                                                        | <i>Shank3</i>                | -4,385867809 | 2,18e-07   |
| Star-related lipid transfer (start) domain containing 4                          | <i>Stard4</i>                | -4,363734775 | 3,66e-07   |
| Cell division cycle associated 3                                                 | <i>Cdca3</i>                 | -4,361485213 | 4,05e-09   |
| Farnesyl diphosphate farnesyl transferase 1                                      | <i>Fdft1</i>                 | -4,350435664 | 4,05e-09   |
| Adenylate cyclase 7                                                              | <i>Adcy7</i>                 | -4,336253192 | 1,95e-08   |
| Sterol regulatory element binding factor 2                                       | <i>Srebf2</i>                | -4,333436097 | 1,80e-08   |

|                                                                     |                          |              |          |
|---------------------------------------------------------------------|--------------------------|--------------|----------|
| Riken cdna 3110007f17 gene                                          | <i>3110007f17rik</i>     | -4,331537902 | 6,68e-06 |
| Solute carrier family 41, member 2                                  | <i>Slc41a2</i>           | -4,324723006 | 6,64e-08 |
| Cell growth regulator with ef hand domain 1                         | <i>Cgref1</i>            | -4,309324357 | 6,05e-07 |
| Amphiregulin                                                        | <i>Areg</i>              | -4,276157085 | 7,03e-08 |
| Microsomal glutathione s-transferase 3                              | <i>Mgst3</i>             | -4,228622324 | 3,18e-08 |
| Serum/glucocorticoid regulated kinase 2                             | <i>Sgk2</i>              | -4,220274372 | 1,98e-07 |
| Dynamin 3, opposite strand /// microrna 214                         | <i>Dnm3os /// mir214</i> | -4,192521835 | 6,84e-08 |
| Apolipoprotein b receptor                                           | <i>Apobr</i>             | -4,191620883 | 2,26e-08 |
| Cd40 antigen                                                        | <i>Cd40</i>              | -4,17755525  | 1,84e-05 |
| Ww, c2 and coiled-coil domain containing 1                          | <i>Wwc1</i>              | -4,134566143 | 8,34e-08 |
| Wingless-type mmtv integration site family, member 7b               | <i>Wnt7b</i>             | -4,131321194 | 4,52e-08 |
| Aurora kinase b                                                     | <i>Aurkb</i>             | -4,116137896 | 8,36e-08 |
| Mannosidase 1, alpha                                                | <i>Man1a</i>             | -4,079152084 | 8,34e-08 |
| Methylsterol monooxygenase 1                                        | <i>Msmo1</i>             | -4,064992921 | 2,54e-06 |
| 3-hydroxy-3-methylglutaryl-coenzyme a reductase                     | <i>Hmgcr</i>             | -4,045851339 | 1,22e-08 |
| Lanosterol synthase                                                 | <i>Lss</i>               | -4,044419964 | 1,37e-08 |
| Loricrin                                                            | <i>Lor</i>               | -3,954602468 | 5,55e-08 |
| Homeobox b2                                                         | <i>Hoxb2</i>             | -3,943754751 | 1,46e-07 |
| Family with sequence similarity 13, member c                        | <i>Fam13c</i>            | -3,902772844 | 6,53e-07 |
| Adducin 2 (beta)                                                    | <i>Add2</i>              | -3,884356481 | 2,82e-07 |
| Vanin 1                                                             | <i>Vnn1</i>              | -3,878181258 | 4,34e-07 |
| Procollagen c-endopeptidase enhancer protein                        | <i>Pcolce</i>            | -3,873678428 | 1,33e-07 |
| Squalene epoxidase                                                  | <i>Sqle</i>              | -3,847996701 | 2,74e-08 |
| Receptor accessory protein 1                                        | <i>Reep1</i>             | -3,830554014 | 6,79e-07 |
| Transmembrane channel-like gene family 4                            | <i>Tmc4</i>              | -3,816284517 | 1,26e-06 |
| Biglycan                                                            | <i>Bgn</i>               | -3,811710794 | 5,17e-07 |
| Solute carrier family 5 (inositol transporters), member 3           | <i>Slc5a3</i>            | -3,790679669 | 1,71e-06 |
| Twist basic helix-loop-helix transcription factor 1                 | <i>Twist1</i>            | -3,755855684 | 4,87e-08 |
| Thioredoxin reductase 2                                             | <i>Txnrd2</i>            | -3,74683134  | 1,13e-08 |
| Proline rich 13                                                     | <i>Prr13</i>             | -3,727814568 | 2,62e-07 |
| Protocadherin 7                                                     | <i>Pcdh7</i>             | -3,71391568  | 2,74e-07 |
| Replication factor c (activator 1) 5                                | <i>Rfc5</i>              | -3,670455578 | 1,30e-08 |
| Non-smc condensin ii complex, subunit h2                            | <i>Ncaph2</i>            | -3,654569737 | 6,43e-07 |
| Testis derived transcript                                           | <i>Tes</i>               | -3,631776178 | 7,03e-08 |
| T-box 3                                                             | <i>Tbx3</i>              | -3,599845114 | 3,14e-08 |
| Left right determination factor 1                                   | <i>Lefty1</i>            | -3,592617851 | 6,94e-08 |
| Pdz and lim domain 2                                                | <i>Pdlim2</i>            | -3,588069676 | 9,90e-08 |
| Homeobox b9                                                         | <i>Hoxb9</i>             | -3,581858712 | 2,30e-06 |
| Death-associated protein                                            | <i>Dap</i>               | -3,570524764 | 1,48e-08 |
| Collapsin response mediator protein 1                               | <i>Crmpl</i>             | -3,566910493 | 8,40e-08 |
| Solute carrier family 2 (facilitated glucose transporter), member 3 | <i>Slc2a3</i>            | -3,565340151 | 1,60e-07 |
| Non-smc condensin i complex, subunit g                              | <i>Ncapg</i>             | -3,543617172 | 5,37e-05 |
| Predicted gene 13889                                                | <i>Gm13889</i>           | -3,528915439 | 4,79e-08 |

|                                                                     |                                       |              |            |
|---------------------------------------------------------------------|---------------------------------------|--------------|------------|
| Homeobox d3 /// homeobox d4                                         | <i>Hoxd3 /// hoxd4</i>                | -3,514374435 | 5,59e-07   |
| Platelet derived growth factor receptor, beta polypeptide           | <i>Pdgfrb</i>                         | -3,505341663 | 1,12e-07   |
| Riken cdna 2610524h06 gene                                          | <i>2610524h06rik</i>                  | -3,503724375 | 4,01e-07   |
| Mannosidase 2, alpha 1                                              | <i>Man2a1</i>                         | -3,499207089 | 2,63e-07   |
| Transmembrane protein 63a                                           | <i>Tmem63a</i>                        | -3,493767193 | 8,40e-08   |
| Progesterone and adiponectin receptor family member iv              | <i>Paqr4</i>                          | -3,491582862 | 5,51e-08   |
| Centromere protein a                                                | <i>Cenpa</i>                          | -3,481290375 | 2,89e-08   |
| Asporin                                                             | <i>Aspn</i>                           | -3,470223056 | 0,00031877 |
| Periostin, osteoblast specific factor                               | <i>Postn</i>                          | -3,46453447  | 4,42e-08   |
| Fatty acid desaturase 2                                             | <i>Fads2</i>                          | -3,452926338 | 2,38e-08   |
| Latrophilin 1                                                       | <i>Lphn1</i>                          | -3,437313483 | 3,56e-06   |
| Riken cdna 2810417h13 gene                                          | <i>2810417h13rik</i>                  | -3,435521867 | 1,19e-08   |
| Expressed sequence au016916                                         | <i>Au016916</i>                       | -3,435392936 | 0,00278018 |
| Ribosome binding protein 1                                          | <i>Rrbp1</i>                          | -3,435299336 | 4,58e-07   |
| Reproductive homeobox 5                                             | <i>Rhox5</i>                          | -3,431389025 | 1,54e-07   |
| Phosphate regulating endopeptidase homolog, x-linked                | <i>Phex</i>                           | -3,427926995 | 2,41e-05   |
| Nuclear autoantigenic sperm protein (histone-binding)               | <i>Nasp</i>                           | -3,419522357 | 1,68e-06   |
| Cytochrome b-561                                                    | <i>Cyb561</i>                         | -3,416983564 | 4,15e-07   |
| Kh domain containing, rna binding, signal transduction associated 3 | <i>Khdrbs3</i>                        | -3,401486129 | 1,54e-07   |
| Cd248 antigen, endosialin                                           | <i>Cd248</i>                          | -3,388804963 | 2,37e-06   |
| Rho gtpase activating protein 18                                    | <i>Arhgap18</i>                       | -3,378836089 | 2,90e-07   |
| Stearoyl-coenzyme a desaturase 2                                    | <i>Scd2</i>                           | -3,377657616 | 6,28e-05   |
| Ribonucleotide reductase m2                                         | <i>Rrm2</i>                           | -3,376405658 | 2,34e-05   |
| Homeobox d8                                                         | <i>Hoxd8</i>                          | -3,362733757 | 8,62e-08   |
| Gli-kruppel family member gli2                                      | <i>Gli2</i>                           | -3,361387347 | 1,90e-06   |
| Deoxycytidine kinase                                                | <i>Dck</i>                            | -3,326908076 | 2,44e-06   |
| Ornithine decarboxylase, structural 1                               | <i>Odc1</i>                           | -3,324439797 | 7,40e-08   |
| Ste20-like kinase                                                   | <i>Slk</i>                            | -3,318422757 | 2,82e-07   |
| Kit ligand                                                          | <i>Kitl</i>                           | -3,286651581 | 0,00024714 |
| Fyn-related kinase                                                  | <i>Erk</i>                            | -3,265839746 | 6,84e-05   |
| Gli pathogenesis-related 1 (glioma)                                 | <i>Gliplr1</i>                        | -3,265285681 | 9,83e-08   |
| Plastin 1 (i-isoform)                                               | <i>Pls1</i>                           | -3,253078701 | 1,65e-05   |
| Arfgap with fg repeats 2                                            | <i>Agfg2</i>                          | -3,239709732 | 2,95e-07   |
| Rab2a, member ras oncogene family                                   | <i>Rab2a</i>                          | -3,238063939 | 0,00656849 |
| Prolactin family 6, subfamily a, member 1                           | <i>Prl6a1</i>                         | -3,23364391  | 2,66e-06   |
| Progressive ankylosis                                               | <i>Ank</i>                            | -3,2281287   | 1,02e-07   |
| ATPase, class v, type 10a                                           | <i>Atp10a</i>                         | -3,227550902 | 2,53e-05   |
| Spermine oxidase                                                    | <i>Smox</i>                           | -3,216273286 | 1,28e-07   |
| Oaf homolog (drosophila)                                            | <i>Oaf</i>                            | -3,206145685 | 1,97e-08   |
| Tlr4 interactor with leucine-rich repeats                           | <i>Tril</i>                           | -3,161396429 | 1,36e-06   |
| Fatty acid synthase                                                 | <i>Fasn</i>                           | -3,156395267 | 7,89e-08   |
| Coronin, actin binding protein 1c /// predicted gene 17122 /// ---  | <i>Coro1c /// gm17122 /// gm17122</i> | -3,14072544  | 0,00670182 |

|                                                                                                                                                                                        |                                                                       |              |          |
|----------------------------------------------------------------------------------------------------------------------------------------------------------------------------------------|-----------------------------------------------------------------------|--------------|----------|
| Acetyl-coenzyme a acetyltransferase 2 /// acetyl-coenzyme a acetyltransferase 3                                                                                                        | <i>Acat2</i> /// <i>acat3</i>                                         | -3,135548713 | 8,05e-07 |
| Polymerase (dna directed), epsilon 2 (p59 subunit)                                                                                                                                     | <i>Pole2</i>                                                          | -3,134917725 | 3,77e-08 |
| Rac gtpase-activating protein 1                                                                                                                                                        | <i>Racgap1</i>                                                        | -3,129503792 | 1,23e-07 |
| Phosphate cytidylyltransferase 2, ethanolamine                                                                                                                                         | <i>Pcyt2</i>                                                          | -3,126555111 | 1,84e-07 |
| Stathmin 1                                                                                                                                                                             | <i>Stmn1</i>                                                          | -3,124987636 | 4,43e-07 |
| Ras related protein 2a                                                                                                                                                                 | <i>Rap2a</i>                                                          | -3,114674117 | 8,59e-08 |
| Chromodomain helicase dna binding protein 3, opposite strand                                                                                                                           | <i>Chd3os</i>                                                         | -3,101140984 | 7,89e-06 |
| Neuropeptide y receptor y5                                                                                                                                                             | <i>Npy5r</i>                                                          | -3,089932686 | 8,70e-05 |
| Cd109 antigen                                                                                                                                                                          | <i>Cd109</i>                                                          | -3,086479029 | 5,79e-07 |
| Protein kinase c, delta binding protein                                                                                                                                                | <i>Prkcdbp</i>                                                        | -3,079564051 | 1,22e-07 |
| Methyltransferase like 7a2                                                                                                                                                             | <i>Mettl7a2</i>                                                       | -3,073074729 | 6,33e-07 |
| Non-smc condensin i complex, subunit d2                                                                                                                                                | <i>Ncapd2</i>                                                         | -3,070850835 | 2,50e-07 |
| Mevalonate kinase                                                                                                                                                                      | <i>Mvk</i>                                                            | -3,061124583 | 3,46e-07 |
| E2f transcription factor 8                                                                                                                                                             | <i>E2f8</i>                                                           | -3,049208984 | 7,03e-07 |
| Myeloid leukemia factor 1                                                                                                                                                              | <i>Mlf1</i>                                                           | -3,034442929 | 5,69e-07 |
| Thrombospondin 2                                                                                                                                                                       | <i>Thbs2</i>                                                          | -3,03268006  | 4,73e-08 |
| Sushi-repeat-containing protein                                                                                                                                                        | <i>Srpx</i>                                                           | -3,028818857 | 1,27e-07 |
| Anoctamin 1, calcium activated chloride channel                                                                                                                                        | <i>Ano1</i>                                                           | -3,02875015  | 3,78e-07 |
| Structural maintenance of chromosomes 6                                                                                                                                                | <i>Smc6</i>                                                           | -3,025576301 | 1,17e-05 |
| Phd finger protein 19                                                                                                                                                                  | <i>Phf19</i>                                                          | -3,025167166 | 2,50e-07 |
| Acetoacetyl-coa synthetase                                                                                                                                                             | <i>Aacs</i>                                                           | -3,020864675 | 1,50e-07 |
| Rab32, member ras oncogene family                                                                                                                                                      | <i>Rab32</i>                                                          | -3,011231264 | 7,35e-07 |
| Tumor necrosis factor receptor superfamily, member 11b (osteoprotegerin)                                                                                                               | <i>Tnfrsf11b</i>                                                      | -3,003292145 | 5,86e-05 |
| Heterogeneous nuclear ribonucleoprotein a1 pseudogene /// heterogeneous nuclear ribonucleoprotein a1 pseudogene /// predicted gene 5803 /// heterogeneous nuclear ribonucleoprotein a1 | <i>Gm10052</i> /// <i>gm5643</i> /// <i>gm5803</i> /// <i>hmrnpa1</i> | -3,000488992 | 4,42e-06 |
| Macro domain containing 2                                                                                                                                                              | <i>MacroD2</i>                                                        | -2,999114042 | 1,34e-06 |
| Potassium channel, subfamily k, member 5                                                                                                                                               | <i>Kcnk5</i>                                                          | -2,984737696 | 2,26e-06 |
| Ligase i, dna, atp-dependent                                                                                                                                                           | <i>Lig1</i>                                                           | -2,977108639 | 4,73e-08 |
| Ras homolog gene family, member j                                                                                                                                                      | <i>Rhoj</i>                                                           | -2,964281667 | 4,59e-08 |
| Neuronal guanine nucleotide exchange factor                                                                                                                                            | <i>Ngef</i>                                                           | -2,946249876 | 9,85e-08 |
| Dna replication helicase 2 homolog (yeast)                                                                                                                                             | <i>Dna2</i>                                                           | -2,941056599 | 9,44e-07 |
| Transketolase                                                                                                                                                                          | <i>Tkt</i>                                                            | -2,940636055 | 4,36e-07 |
| Ca2+-dependent secretion activator                                                                                                                                                     | <i>Cadps</i>                                                          | -2,929154653 | 1,39e-07 |
| Rho gtpase activating protein 8                                                                                                                                                        | <i>Arhgap8</i>                                                        | -2,926573445 | 1,25e-07 |
| Rad51 associated protein 1                                                                                                                                                             | <i>Rad51ap1</i>                                                       | -2,925585806 | 6,68e-07 |
| Angiopoietin 2                                                                                                                                                                         | <i>Angpt2</i>                                                         | -2,913893314 | 5,14e-08 |
| Ellis van creveld gene syndrome                                                                                                                                                        | <i>Evc</i>                                                            | -2,910741293 | 1,75e-05 |
| Galanin receptor 3 /// glycine c-acetyltransferase (2-amino-3-ketobutyrate-coenzyme a ligase)                                                                                          | <i>Galr3</i> /// <i>gcat</i>                                          | -2,898737311 | 2,71e-07 |
| Kinesin family member 20a                                                                                                                                                              | <i>Kif20a</i>                                                         | -2,896096584 | 3,56e-06 |
| Snail family zinc finger 1                                                                                                                                                             | <i>Snai1</i>                                                          | -2,885062529 | 3,57e-06 |
| Protein phosphatase 6, regulatory subunit 3                                                                                                                                            | <i>Ppp6r3</i>                                                         | -2,884055054 | 1,06e-06 |

|                                                                                                                             |                                                          |              |            |
|-----------------------------------------------------------------------------------------------------------------------------|----------------------------------------------------------|--------------|------------|
| Glutathione s-transferase, theta 1                                                                                          | <i>Gstt1</i>                                             | -2,883553103 | 1,38e-05   |
| Centromere protein m                                                                                                        | <i>Cenpm</i>                                             | -2,86592853  | 2,49e-06   |
| Dynamin 1                                                                                                                   | <i>Dnm1</i>                                              | -2,864633206 | 2,97e-06   |
| Fibroblast growth factor receptor 2                                                                                         | <i>Fgfr2</i>                                             | -2,863622316 | 5,28e-06   |
| Antisense igf2r rna                                                                                                         | <i>Airn</i>                                              | -2,861082936 | 4,17e-05   |
| Family with sequence similarity 109, member b                                                                               | <i>Fam109b</i>                                           | -2,858508581 | 0,00034551 |
| Fibrinogen-like protein 2                                                                                                   | <i>Fgl2</i>                                              | -2,857533301 | 7,45e-06   |
| Low density lipoprotein receptor                                                                                            | <i>Ldlr</i>                                              | -2,855592611 | 1,25e-07   |
| Family with sequence similarity 111, member a                                                                               | <i>Fam111a</i>                                           | -2,85521501  | 4,95e-08   |
| Tubulin, alpha 1c pseudogene /// tubulin, alpha 1c                                                                          | <i>Gm6682 /// tuba1c</i>                                 | -2,854493887 | 4,08e-05   |
| Lymphocyte specific 1                                                                                                       | <i>Lsp1</i>                                              | -2,854218658 | 2,08e-06   |
| Heterogeneous nuclear ribonucleoprotein u-like 2                                                                            | <i>Hnrnpul2</i>                                          | -2,847030821 | 1,14e-06   |
| Hydroxysteroid (17-beta) dehydrogenase 11                                                                                   | <i>Hsd17b11</i>                                          | -2,843348612 | 3,72e-06   |
| Siva1, apoptosis-inducing factor                                                                                            | <i>Siva1</i>                                             | -2,832673421 | 1,03e-07   |
| Shc sh2-domain binding protein 1                                                                                            | <i>Shcbp1</i>                                            | -2,824927432 | 3,81e-07   |
| Udp-glcna:betagal beta-1,3-n-acetylglucosaminyltransferase 5                                                                | <i>B3gnt5</i>                                            | -2,824634123 | 0,00011634 |
| Heat shock protein 1a                                                                                                       | <i>Hspa1a</i>                                            | -2,823380942 | 7,86e-06   |
| Phosphofructokinase, platelet                                                                                               | <i>Pfkip</i>                                             | -2,796248462 | 4,02e-08   |
| Procollagen-proline, 2-oxoglutarate 4-dioxygenase (proline 4-hydroxylase), alpha 1 polypeptide                              | <i>P4ha1</i>                                             | -2,790009537 | 6,43e-06   |
| Expressed sequence aa517023                                                                                                 | <i>Aa517023</i>                                          | -2,786082952 | 2,42e-05   |
| Phosphatase and actin regulator 1                                                                                           | <i>Phactr1</i>                                           | -2,784081759 | 1,00e-05   |
| Growth arrest specific 7                                                                                                    | <i>Gas7</i>                                              | -2,765685206 | 0,000283   |
| Protein phosphatase 2, regulatory subunit b, delta                                                                          | <i>Ppp2r2d</i>                                           | -2,760783861 | 0,00509182 |
| Stanniocalcin 1                                                                                                             | <i>Stc1</i>                                              | -2,753526888 | 4,33e-06   |
| Netrin 1                                                                                                                    | <i>Ntn1</i>                                              | -2,747047681 | 3,62e-06   |
| Transcription factor ap-2, alpha                                                                                            | <i>Tfap2a</i>                                            | -2,745691031 | 3,71e-06   |
| Fatty acid binding protein 4, adipocyte                                                                                     | <i>Fabp4</i>                                             | -2,739046261 | 6,17e-07   |
| Cyclin a2                                                                                                                   | <i>Ccna2</i>                                             | -2,733487358 | 9,08e-06   |
| Predicted gene 5481 /// predicted gene 6109 /// predicted gene 6570 /// predicted pseudogene 7429 /// ribosomal protein l30 | <i>Gm5481 /// gm6109 /// gm6570 /// gm7429 /// rpl30</i> | -2,728464309 | 3,58e-07   |
| Netrin g1                                                                                                                   | <i>Ntng1</i>                                             | -2,72561976  | 0,0009973  |
| Small g protein signaling modulator 3                                                                                       | <i>Sgsm3</i>                                             | -2,722120033 | 4,12e-08   |
| Rad54 like (s. Cerevisiae)                                                                                                  | <i>Rad54l</i>                                            | -2,718817736 | 5,17e-07   |
| Dual specificity phosphatase 6                                                                                              | <i>Dusp6</i>                                             | -2,717460546 | 3,52e-07   |
| Transmembrane protein 41b                                                                                                   | <i>Tmem41b</i>                                           | -2,711591425 | 2,02e-05   |
| Aldehyde dehydrogenase 1 family, member l1                                                                                  | <i>Aldh1l1</i>                                           | -2,698995054 | 2,17e-07   |
| Glucosaminyl (n-acetyl) transferase 1, core 2                                                                               | <i>Gcnt1</i>                                             | -2,690451571 | 6,05e-06   |
| Mitochondrial ribosomal protein s25                                                                                         | <i>Mrps25</i>                                            | -2,679450332 | 4,80e-07   |
| Antigen identified by monoclonal antibody ki 67                                                                             | <i>Mki67</i>                                             | -2,679344977 | 6,89e-08   |
| Lumican                                                                                                                     | <i>Lum</i>                                               | -2,676163136 | 6,73e-06   |
| Rar-related orphan receptor beta                                                                                            | <i>Rorb</i>                                              | -2,665590381 | 1,00e-05   |
| Collagen, type i, alpha 1                                                                                                   | <i>Col1a1</i>                                            | -2,663316305 | 2,87e-06   |
| Sumo1/sentrin specific peptidase 1                                                                                          | <i>Senp1</i>                                             | -2,652639712 | 1,43e-06   |



|                                                                                                                                                        |                                                                                              |              |            |
|--------------------------------------------------------------------------------------------------------------------------------------------------------|----------------------------------------------------------------------------------------------|--------------|------------|
| Centromere protein h                                                                                                                                   | <i>Cenph</i>                                                                                 | -2,652171036 | 3,48e-06   |
| Cyclin b1                                                                                                                                              | <i>Ccnb1</i>                                                                                 | -2,645806352 | 0,00575329 |
| Mitogen-activated protein kinase kinase kinase 12                                                                                                      | <i>Map3k12</i>                                                                               | -2,64345971  | 0,00803329 |
| Vac14 homolog (s. Cerevisiae)                                                                                                                          | <i>Vac14</i>                                                                                 | -2,634427295 | 4,06e-06   |
| Cyclin e2                                                                                                                                              | <i>Ccne2</i>                                                                                 | -2,631380429 | 0,00782356 |
| Nad(p) dependent steroid dehydrogenase-like                                                                                                            | <i>Nsdhl</i>                                                                                 | -2,631078292 | 9,94e-08   |
| Mad2 mitotic arrest deficient-like 1                                                                                                                   | <i>Mad2l1</i>                                                                                | -2,628604711 | 1,07e-07   |
| Leucine rich repeat protein 1                                                                                                                          | <i>Lrr1</i>                                                                                  | -2,626822007 | 2,16e-06   |
| Polymerase (dna directed), mu                                                                                                                          | <i>Polm</i>                                                                                  | -2,626776992 | 9,02e-06   |
| Solute carrier family 7 (cationic amino acid transporter, y+ system), member 6                                                                         | <i>Slc7a6</i>                                                                                | -2,625603596 | 8,75e-07   |
| Chemokine (c-c motif) ligand 27a /// chemokine (c-c motif) ligand 27b /// predicted gene 13306 /// predicted gene 2506 /// c-c motif chemokine 27-like | <i>Ccl27a</i> /// <i>ccl27b</i> /// <i>gm13306</i> /// <i>gm2506</i> /// <i>loc100861978</i> | -2,625458963 | 3,10e-06   |
| Complement component 3a receptor 1                                                                                                                     | <i>C3ar1</i>                                                                                 | -2,614418531 | 3,66e-06   |
| Ndc1 transmembrane nucleoporin                                                                                                                         | <i>Ndc1</i>                                                                                  | -2,613950047 | 3,97e-05   |
| Kinesin family member 2c                                                                                                                               | <i>Kif2c</i>                                                                                 | -2,611378214 | 1,14e-06   |
| Thymic stromal lymphopoietin                                                                                                                           | <i>Tslp</i>                                                                                  | -2,610613393 | 0,00016436 |
| Lymphocyte antigen 6 complex, locus c1 /// lymphocyte antigen 6 complex, locus c2                                                                      | <i>Ly6c1</i> /// <i>ly6c2</i>                                                                | -2,609343519 | 3,01e-07   |
| Ecotropic viral integration site 2a                                                                                                                    | <i>Evi2a</i>                                                                                 | -2,609017825 | 4,18e-07   |
| Ring finger protein 130                                                                                                                                | <i>Rnf130</i>                                                                                | -2,606446261 | 8,04e-07   |
| Arfgap with sh3 domain, ankyrin repeat and ph domain1                                                                                                  | <i>Asap1</i>                                                                                 | -2,581156104 | 6,34e-08   |
| Tubulin, alpha 3a /// tubulin, alpha 3b                                                                                                                | <i>Tuba3a</i> /// <i>tuba3b</i>                                                              | -2,580281268 | 5,38e-07   |
| Osteoclast stimulating factor 1                                                                                                                        | <i>Ostf1</i>                                                                                 | -2,580170208 | 6,24e-08   |
| Serine (or cysteine) peptidase inhibitor, clade e, member 2                                                                                            | <i>Serpine2</i>                                                                              | -2,577522825 | 3,06e-07   |
| Ral guanine nucleotide dissociation stimulator,-like 1                                                                                                 | <i>Rgl1</i>                                                                                  | -2,571920714 | 3,54e-07   |
| Leucine-rich repeat kinase 2                                                                                                                           | <i>Lrrk2</i>                                                                                 | -2,571900438 | 1,31e-06   |
| Ectopic ossification 1                                                                                                                                 | <i>Etos1</i>                                                                                 | -2,566023142 | 2,14e-06   |
| Transient receptor potential cation channel, subfamily c, member 1                                                                                     | <i>Trpc1</i>                                                                                 | -2,564655046 | 0,00017968 |
| Laminin, alpha 4                                                                                                                                       | <i>Lama4</i>                                                                                 | -2,562846246 | 0,00011373 |
| Kinesin family member 21a                                                                                                                              | <i>Kif21a</i>                                                                                | -2,561315963 | 1,24e-06   |
| 3-oxoacid coa transferase 1                                                                                                                            | <i>Oxct1</i>                                                                                 | -2,558266995 | 2,70e-05   |
| Sterol regulatory element binding transcription factor 1                                                                                               | <i>Srebfl</i>                                                                                | -2,553320694 | 2,56e-07   |
| N-myc downstream regulated gene 4                                                                                                                      | <i>Ndr4</i>                                                                                  | -2,548770182 | 2,81e-07   |
| Baculoviral iap repeat-containing 5                                                                                                                    | <i>Birc5</i>                                                                                 | -2,546941449 | 2,94e-07   |
| Kinesin family member 23                                                                                                                               | <i>Kif23</i>                                                                                 | -2,541118575 | 0,00013278 |
| Insulin-like growth factor binding protein 4                                                                                                           | <i>Igfbp4</i>                                                                                | -2,540947669 | 4,41e-06   |
| Downstream of stk11                                                                                                                                    | <i>Dos</i>                                                                                   | -2,531527598 | 7,25e-05   |
| Suppression of tumorigenicity 13                                                                                                                       | <i>St13</i>                                                                                  | -2,522216963 | 2,86e-07   |
| High mobility group at-hook 2                                                                                                                          | <i>Hmga2</i>                                                                                 | -2,516452234 | 4,02e-06   |
| Tubulin, beta 3 class iii                                                                                                                              | <i>Tubb3</i>                                                                                 | -2,516419794 | 6,12e-05   |
| Sorcin                                                                                                                                                 | <i>Sri</i>                                                                                   | -2,515032489 | 1,81e-07   |

|                                                                                                                                                                                                                                                                                     |                                                                                                                                                |              |            |
|-------------------------------------------------------------------------------------------------------------------------------------------------------------------------------------------------------------------------------------------------------------------------------------|------------------------------------------------------------------------------------------------------------------------------------------------|--------------|------------|
| Cyclin-dependent kinase inhibitor 2d (p19, inhibits cdk4)                                                                                                                                                                                                                           | <i>Cdkn2d</i>                                                                                                                                  | -2,511751811 | 2,04e-07   |
| Eh-domain containing 3                                                                                                                                                                                                                                                              | <i>Ehd3</i>                                                                                                                                    | -2,511741717 | 2,74e-05   |
| Ephrin b1                                                                                                                                                                                                                                                                           | <i>Efnb1</i>                                                                                                                                   | -2,511006158 | 1,20e-05   |
| Enhancer of zeste homolog 2 (drosophila)                                                                                                                                                                                                                                            | <i>Ezh2</i>                                                                                                                                    | -2,506944908 | 7,88e-07   |
| Hypermethylated in cancer 1                                                                                                                                                                                                                                                         | <i>Hic1</i>                                                                                                                                    | -2,504112547 | 2,61e-06   |
| Aldo-keto reductase family 1, member b8                                                                                                                                                                                                                                             | <i>Akr1b8</i>                                                                                                                                  | -2,500611284 | 1,35e-07   |
| Protease-associated domain containing 1                                                                                                                                                                                                                                             | <i>Pradc1</i>                                                                                                                                  | -2,498247381 | 7,30e-07   |
| Galactose-4-epimerase, udp                                                                                                                                                                                                                                                          | <i>Gale</i>                                                                                                                                    | -2,491645898 | 2,24e-07   |
| Tripartite motif-containing 24                                                                                                                                                                                                                                                      | <i>Trim24</i>                                                                                                                                  | -2,488248788 | 1,75e-06   |
| Ephrin a2                                                                                                                                                                                                                                                                           | <i>Efna2</i>                                                                                                                                   | -2,477206253 | 8,77e-07   |
| Predicted gene 2808 /// tubby like protein 4                                                                                                                                                                                                                                        | <i>Gm2808 /// tulp4</i>                                                                                                                        | -2,474053296 | 5,92e-06   |
| Epithelial membrane protein 3                                                                                                                                                                                                                                                       | <i>Emp3</i>                                                                                                                                    | -2,473820554 | 4,86e-07   |
| Tropomyosin 1, alpha                                                                                                                                                                                                                                                                | <i>Tpm1</i>                                                                                                                                    | -2,473728545 | 1,04e-06   |
| Transcription factor 4                                                                                                                                                                                                                                                              | <i>Tcf4</i>                                                                                                                                    | -2,472305216 | 1,01e-05   |
| Angiopoietin-like 4                                                                                                                                                                                                                                                                 | <i>Angptl4</i>                                                                                                                                 | -2,471794109 | 5,31e-05   |
| Lymphoid enhancer binding factor 1                                                                                                                                                                                                                                                  | <i>Lef1</i>                                                                                                                                    | -2,470372697 | 2,04e-05   |
| Serine/threonine kinase 3                                                                                                                                                                                                                                                           | <i>Stk3</i>                                                                                                                                    | -2,468743684 | 8,75e-07   |
| Camp responsive element binding protein 3-like 2                                                                                                                                                                                                                                    | <i>Creb3l2</i>                                                                                                                                 | -2,468609617 | 5,16e-07   |
| Mitochondrial ribosomal protein s6                                                                                                                                                                                                                                                  | <i>Mrps6</i>                                                                                                                                   | -2,467888542 | 4,56e-07   |
| Histone cluster 1, h2ab /// histone cluster 1, h2ac /// histone cluster 1, h2ad /// histone cluster 1, h2ae /// histone cluster 1, h2ag /// histone cluster 1, h2ah /// histone cluster 1, h2ai /// histone cluster 1, h2an /// histone cluster 1, h2ao /// histone cluster 1, h2ap | <i>Hist1h2ab /// hist1h2ac /// hist1h2ad /// hist1h2ae /// hist1h2ag /// hist1h2ah /// hist1h2ai /// hist1h2an /// hist1h2ao /// hist1h2ap</i> | -2,465615291 | 3,87e-07   |
| Cd80 antigen                                                                                                                                                                                                                                                                        | <i>Cd80</i>                                                                                                                                    | -2,462940112 | 5,58e-07   |
| Annexin a11 /// predicted gene 2260 /// predicted gene 2274                                                                                                                                                                                                                         | <i>Anxa11 /// gm2260 /// gm2274</i>                                                                                                            | -2,46286027  | 0,00253088 |
| Thymidylate synthase /// thymidylate synthase, pseudogene                                                                                                                                                                                                                           | <i>Tyms /// tyms-ps</i>                                                                                                                        | -2,459370332 | 1,24e-07   |
| Sema domain, seven thrombospondin repeats (type 1 and type 1-like), transmembrane domain (tm) and short cytoplasmic domain, (semaphorin) 5a                                                                                                                                         | <i>Sema5a</i>                                                                                                                                  | -2,458711958 | 1,09e-06   |
| Fer (fms/fps related) protein kinase, testis specific 2                                                                                                                                                                                                                             | <i>Fert2</i>                                                                                                                                   | -2,456311225 | 6,30e-06   |
| Nuclear factor i/b                                                                                                                                                                                                                                                                  | <i>Nfib</i>                                                                                                                                    | -2,455298801 | 2,71e-05   |
| Hexokinase 1                                                                                                                                                                                                                                                                        | <i>Hk1</i>                                                                                                                                     | -2,454703065 | 3,10e-05   |
| Sema domain, immunoglobulin domain (ig), transmembrane domain (tm) and short cytoplasmic domain, (semaphorin) 4g                                                                                                                                                                    | <i>Sema4g</i>                                                                                                                                  | -2,451222625 | 3,66e-06   |
| Fucosyltransferase 8                                                                                                                                                                                                                                                                | <i>Fut8</i>                                                                                                                                    | -2,450385033 | 6,53e-07   |
| Maternal embryonic leucine zipper kinase                                                                                                                                                                                                                                            | <i>Melk</i>                                                                                                                                    | -2,44927786  | 1,25e-05   |
| Collagen, type vi, alpha 1                                                                                                                                                                                                                                                          | <i>Col6a1</i>                                                                                                                                  | -2,447123572 | 6,29e-06   |
| Inositol (myo)-1(or 4)-monophosphatase 2                                                                                                                                                                                                                                            | <i>Impa2</i>                                                                                                                                   | -2,44702782  | 5,56e-07   |
| Cytoskeleton associated protein 2                                                                                                                                                                                                                                                   | <i>Ckap2</i>                                                                                                                                   | -2,444768812 | 1,14e-07   |

|                                                                                                                                     |                          |              |            |
|-------------------------------------------------------------------------------------------------------------------------------------|--------------------------|--------------|------------|
| Epithelial membrane protein 1                                                                                                       | <i>Emp1</i>              | -2,443046585 | 1,86e-06   |
| Pleckstrin homology-like domain, family a, member 1                                                                                 | <i>Phlda1</i>            | -2,441801371 | 1,21e-05   |
| Isl1 transcription factor, lim/homeodomain                                                                                          | <i>Isl1</i>              | -2,440824397 | 5,32e-06   |
| Syntrophin, basic 2                                                                                                                 | <i>Sntb2</i>             | -2,439115095 | 1,75e-05   |
| Docking protein 1                                                                                                                   | <i>Dok1</i>              | -2,438995427 | 4,63e-07   |
| Occludin                                                                                                                            | <i>Ocln</i>              | -2,437583243 | 2,60e-05   |
| Dna primase, p49 subunit                                                                                                            | <i>Prim1</i>             | -2,430503063 | 2,11e-07   |
| Dnaj (hsp40) homolog, subfamily c, member 9                                                                                         | <i>Dnajc9</i>            | -2,427319311 | 1,64e-07   |
| Spectrin repeat containing, nuclear envelope 2                                                                                      | <i>Syne2</i>             | -2,42711997  | 6,42e-06   |
| Zinc finger protein 518b                                                                                                            | <i>Zfp518b</i>           | -2,426478634 | 1,06e-06   |
| Family with sequence similarity 64, member a                                                                                        | <i>Fam64a</i>            | -2,424942792 | 7,33e-07   |
| Inner centromere protein                                                                                                            | <i>Incnp</i>             | -2,424904674 | 3,83e-07   |
| H2a histone family, member y2 /// h2a histone family, member y3                                                                     | <i>H2afy2 /// h2afy3</i> | -2,420684284 | 0,00091066 |
| Transmembrane protein 229b                                                                                                          | <i>Tmem229b</i>          | -2,419053051 | 6,64e-06   |
| Riken cdna 6430548m08 gene                                                                                                          | <i>6430548m08rik</i>     | -2,419020241 | 1,33e-06   |
| Doublecortin-like kinase 1                                                                                                          | <i>Dclk1</i>             | -2,417432994 | 5,43e-06   |
| Rna binding motif protein 14                                                                                                        | <i>Rbm14</i>             | -2,41126864  | 9,36e-07   |
| Citron                                                                                                                              | <i>Cit</i>               | -2,407895368 | 2,04e-06   |
| Mas-related gpr, member f                                                                                                           | <i>Mrgprf</i>            | -2,40575826  | 0,00064105 |
| Serum/glucocorticoid regulated kinase 3                                                                                             | <i>Sgk3</i>              | -2,401483499 | 2,31e-06   |
| Ccr4-not transcription complex, subunit 6                                                                                           | <i>Cnot6</i>             | -2,394878336 | 1,91e-05   |
| Acyl-coa synthetase long-chain family member 5                                                                                      | <i>Acsf5</i>             | -2,391844142 | 1,52e-07   |
| Cyclin-dependent kinase inhibitor 1a (p21)                                                                                          | <i>Cdkn1a</i>            | -2,390823901 | 2,48e-06   |
| Ras association (ralgds/af-6) domain family (n-terminal) member 8                                                                   | <i>Rassf8</i>            | -2,38605618  | 2,23e-07   |
| Cell division cycle 20                                                                                                              | <i>Cdc20</i>             | -2,381237864 | 1,85e-06   |
| Fibroblast growth factor 18                                                                                                         | <i>Fgf18</i>             | -2,37897454  | 1,95e-06   |
| Apoptotic peptidase activating factor 1                                                                                             | <i>Apaf1</i>             | -2,378805927 | 1,79e-06   |
| Salvador homolog 1 (drosophila)                                                                                                     | <i>Sav1</i>              | -2,376966301 | 1,07e-06   |
| Myocyte enhancer factor 2c                                                                                                          | <i>Mef2c</i>             | -2,37394173  | 5,43e-06   |
| Matrix metalloproteinase 16                                                                                                         | <i>Mmp16</i>             | -2,372152633 | 5,16e-07   |
| H2a histone family, member y2                                                                                                       | <i>H2afy2</i>            | -2,365870471 | 1,67e-05   |
| Riken cdna 5031439g07 gene                                                                                                          | <i>5031439g07rik</i>     | -2,365585411 | 6,59e-07   |
| Sh3-binding kinase 1                                                                                                                | <i>Sbk1</i>              | -2,364258044 | 7,56e-06   |
| Fragile x mental retardation syndrome 1                                                                                             | <i>Fmr1</i>              | -2,363437936 | 0,00011227 |
| Potassium channel tetramerisation domain containing 10                                                                              | <i>Kctd10</i>            | -2,362615881 | 6,33e-07   |
| Zinc finger protein 101                                                                                                             | <i>Zfp101</i>            | -2,36205226  | 9,37e-07   |
| Methylenetetrahydrofolate dehydrogenase (nadp+ dependent), methenyltetrahydrofolate cyclohydrolase, formyltetrahydrofolate synthase | <i>Mthfd1</i>            | -2,362022078 | 3,85e-07   |
| Marvel (membrane-associating) domain containing 1                                                                                   | <i>Marveld1</i>          | -2,360885525 | 1,26e-06   |
| Transmembrane 7 superfamily member 2                                                                                                | <i>Tm7sf2</i>            | -2,355191044 | 5,10e-05   |
| Glutamate receptor, ionotropic, kainate 2 (beta 2)                                                                                  | <i>Grik2</i>             | -2,351922128 | 3,49e-06   |
| Synaptonemal complex central element protein 2                                                                                      | <i>Syce2</i>             | -2,346154542 | 7,34e-07   |

|                                                                                               |                                          |              |            |
|-----------------------------------------------------------------------------------------------|------------------------------------------|--------------|------------|
| Cyclin m2                                                                                     | <i>Cnnm2</i>                             | -2,341462782 | 1,67e-05   |
| Transcription factor 19                                                                       | <i>Tcf19</i>                             | -2,340058359 | 1,78e-07   |
| Trio and f-actin binding protein                                                              | <i>Triobp</i>                            | -2,335449495 | 2,12e-05   |
| Kinesin family member 11                                                                      | <i>Kif11</i>                             | -2,335229052 | 2,20e-06   |
| Synaptopodin                                                                                  | <i>Synpo</i>                             | -2,332887616 | 4,23e-07   |
| Mitogen-activated protein kinase kinase 6                                                     | <i>Map2k6</i>                            | -2,332857898 | 5,43e-06   |
| Mesoderm specific transcript                                                                  | <i>Mest</i>                              | -2,331973201 | 0,00012909 |
| Eyes absent 4 homolog (drosophila)                                                            | <i>Eya4</i>                              | -2,329264634 | 3,96e-05   |
| Dead (asp-glu-ala-asp) box polypeptide 39                                                     | <i>Ddx39</i>                             | -2,32704926  | 9,34e-06   |
| Oxidation resistance 1                                                                        | <i>Oxr1</i>                              | -2,321931981 | 2,28e-06   |
| Leukotriene a4 hydrolase                                                                      | <i>Lta4h</i>                             | -2,318622657 | 3,40e-07   |
| S100 calcium binding protein a10 (calpactin)                                                  | <i>S100a10</i>                           | -2,318272439 | 2,14e-07   |
| Thymidine kinase 1                                                                            | <i>Tk1</i>                               | -2,31502236  | 6,02e-07   |
| Odd-skipped related 2                                                                         | <i>Osr2</i>                              | -2,314851557 | 1,34e-05   |
| Ectonucleoside triphosphate diphosphohydrolase 7                                              | <i>Entpd7</i>                            | -2,310964658 | 9,60e-05   |
| Zinc finger homeodomain 4                                                                     | <i>Zfx4</i>                              | -2,310076726 | 4,78e-06   |
| Achalasia, adrenocortical insufficiency, alacrimia                                            | <i>Aaas</i>                              | -2,309615941 | 2,96e-06   |
| Fused in sarcoma                                                                              | <i>Fus</i>                               | -2,309278327 | 0,00010383 |
| Riken cdna 2610507b11 gene                                                                    | <i>2610507b11rik</i>                     | -2,303596893 | 2,41e-05   |
| Small proline-rich protein 2a1 /// small proline-rich protein 2a2                             | <i>Sprr2a1 /// sprr2a2</i>               | -2,302520361 | 1,72e-06   |
| Minichromosome maintenance deficient 5, cell division cycle 46 (s. Cerevisiae)                | <i>Mcm5</i>                              | -2,299256334 | 9,21e-07   |
| G protein-coupled receptor 153                                                                | <i>Gpr153</i>                            | -2,296611432 | 2,87e-05   |
| Predicted gene 9840 /// ring-box 1                                                            | <i>Gm9840 /// rbx1</i>                   | -2,296377542 | 1,79e-05   |
| Smoothened homolog (drosophila)                                                               | <i>Smo</i>                               | -2,294660089 | 2,54e-05   |
| Chromobox 5                                                                                   | <i>Cbx5</i>                              | -2,29193546  | 0,00583869 |
| Nei like 3 (e. Coli)                                                                          | <i>Nei3</i>                              | -2,289273704 | 1,48e-06   |
| Ubiquitin carboxy-terminal hydrolase 11                                                       | <i>Uchl1</i>                             | -2,28837722  | 2,29e-05   |
| Anillin, actin binding protein                                                                | <i>Anln</i>                              | -2,286254633 | 4,82e-06   |
| Dihydropyrimidinase                                                                           | <i>Dpys</i>                              | -2,283210158 | 1,62e-06   |
| Phosphatase and actin regulator 2                                                             | <i>Phactr2</i>                           | -2,282791039 | 8,71e-05   |
| Gap junction protein, alpha 1                                                                 | <i>Gja1</i>                              | -2,28215314  | 0,001153   |
| Dip2 disco-interacting protein 2 homolog b (drosophila)                                       | <i>Dip2b</i>                             | -2,279954773 | 1,67e-06   |
| Actin related protein 2/3 complex, subunit 4                                                  | <i>Arpc4</i>                             | -2,279421823 | 2,79e-06   |
| Transcription factor 7 like 2, t cell specific, hmg box                                       | <i>Tcf7l2</i>                            | -2,27260327  | 2,07e-06   |
| Riken cdna 4933413g19 gene /// forkhead box m1 /// phosphatidylethanolamine binding protein 1 | <i>4933413g19rik /// foxm1 /// pebp1</i> | -2,271684296 | 3,14e-05   |
| Riken cdna 2310039h08 gene                                                                    | <i>2310039h08rik</i>                     | -2,270474905 | 5,61e-06   |
| Nuclear factor of activated t cells, cytoplasmic, calcineurin dependent 4                     | <i>Nfatc4</i>                            | -2,27026727  | 1,16e-05   |
| Prolactin regulatory element binding                                                          | <i>Preb</i>                              | -2,269088463 | 7,43e-05   |
| Cell division cycle 7 (s. Cerevisiae)                                                         | <i>Cdc7</i>                              | -2,267561846 | 3,66e-06   |
| Solute carrier family 2 (facilitated glucose transporter), member 5                           | <i>Slc2a5</i>                            | -2,266264455 | 5,41e-06   |
| Sulfiredoxin 1 homolog (s. Cerevisiae)                                                        | <i>Srxn1</i>                             | -2,265217446 | 0,00362022 |

|                                                                                                                                                               |                                                |              |            |
|---------------------------------------------------------------------------------------------------------------------------------------------------------------|------------------------------------------------|--------------|------------|
| Lamin b1                                                                                                                                                      | <i>Lmnb1</i>                                   | -2,262020893 | 4,46e-06   |
| Cyclin f                                                                                                                                                      | <i>Ccnf</i>                                    | -2,259240824 | 1,55e-05   |
| Epoxide hydrolase 1, microsomal                                                                                                                               | <i>Ephx1</i>                                   | -2,258446983 | 8,58e-07   |
| Thymopoietin                                                                                                                                                  | <i>Tmpo</i>                                    | -2,258070876 | 0,00101906 |
| G protein-coupled receptor kinase 6                                                                                                                           | <i>Grk6</i>                                    | -2,257140237 | 2,34e-06   |
| Eh-domain containing 1                                                                                                                                        | <i>Ehd1</i>                                    | -2,246675106 | 4,06e-06   |
| 3'-phosphoadenosine 5'-phosphosulfate synthase 2                                                                                                              | <i>Papss2</i>                                  | -2,24341301  | 2,51e-06   |
| Kdel (lys-asp-glu-leu) endoplasmic reticulum protein retention receptor 2                                                                                     | <i>Kdelr2</i>                                  | -2,238390855 | 4,11e-05   |
| Src homology three (sh3) and cysteine rich domain                                                                                                             | <i>Stac</i>                                    | -2,235955268 | 2,74e-06   |
| Transmembrane protein 144                                                                                                                                     | <i>Tmem144</i>                                 | -2,235089917 | 0,00010505 |
| Phosphatidylinositol 4-kinase type 2 beta                                                                                                                     | <i>Pi4k2b</i>                                  | -2,233941959 | 0,00069632 |
| Cklf-like marvel transmembrane domain containing 7                                                                                                            | <i>Cmtm7</i>                                   | -2,233443246 | 5,70e-06   |
| Predicted gene, 17748 /// peptidyl prolyl isomerase h                                                                                                         | <i>Gm17748 /// ppih</i>                        | -2,231690879 | 1,77e-06   |
| Vps20-associated 1 homolog (s. Cerevisiae)                                                                                                                    | <i>Vta1</i>                                    | -2,225197014 | 2,03e-06   |
| Poly (adp-ribose) polymerase family, member 12                                                                                                                | <i>Parp12</i>                                  | -2,223229059 | 0,00045224 |
| Glutamate receptor, ionotropic, ampa4 (alpha 4)                                                                                                               | <i>Gria4</i>                                   | -2,22110785  | 0,00010874 |
| 7-dehydrocholesterol reductase                                                                                                                                | <i>Dhcr7</i>                                   | -2,218273637 | 0,00033278 |
| Predicted gene 7040 /// prolactin family 2, subfamily c, member 2 /// prolactin family 2, subfamily c, member 3 /// prolactin family 2, subfamily c, member 4 | <i>Gm7040 /// prl2c2 /// prl2c3 /// prl2c4</i> | -2,216600544 | 3,11e-07   |
| Formin-like 3                                                                                                                                                 | <i>Fmnl3</i>                                   | -2,215824332 | 2,52e-06   |
| Jerky                                                                                                                                                         | <i>Jrk</i>                                     | -2,214719472 | 5,92e-07   |
| Hop homeobox                                                                                                                                                  | <i>Hopx</i>                                    | -2,212871533 | 9,57e-05   |
| Run and fyve domain containing 1                                                                                                                              | <i>Rufy1</i>                                   | -2,206003993 | 1,48e-06   |
| H2a histone family, member y                                                                                                                                  | <i>H2afy</i>                                   | -2,204515657 | 2,77e-06   |
| Er degradation enhancer, mannosidase alpha-like 1                                                                                                             | <i>Edem1</i>                                   | -2,204256237 | 2,83e-06   |
| Solute carrier family 48 (heme transporter), member 1                                                                                                         | <i>Slc48a1</i>                                 | -2,201255241 | 2,53e-06   |
| Ribonucleotide reductase m1                                                                                                                                   | <i>Rrm1</i>                                    | -2,200789928 | 0,00042666 |
| Cxadr-like membrane protein                                                                                                                                   | <i>Clmp</i>                                    | -2,200490947 | 0,00156595 |
| Centlein, centrosomal protein                                                                                                                                 | <i>Cntln</i>                                   | -2,197752252 | 3,19e-06   |
| Lim domain only 7                                                                                                                                             | <i>Lmo7</i>                                    | -2,197130047 | 5,11e-07   |
| Cell division cycle associated 5                                                                                                                              | <i>Cdca5</i>                                   | -2,195704143 | 2,48e-06   |
| Family with sequence similarity 220, member a                                                                                                                 | <i>Fam220a</i>                                 | -2,195700201 | 5,50e-06   |
| Sh3 domain ysc-like 1                                                                                                                                         | <i>Sh3yl1</i>                                  | -2,195636535 | 1,31e-06   |
| Guanylate cyclase activator 1a (retina)                                                                                                                       | <i>Guca1a</i>                                  | -2,195268635 | 0,00025026 |
| Neuropeptide y                                                                                                                                                | <i>Npy</i>                                     | -2,194647299 | 4,43e-06   |
| Alpha fetoprotein                                                                                                                                             | <i>Afp</i>                                     | -2,193988061 | 0,00165405 |
| Cyclin b2                                                                                                                                                     | <i>Ccnb2</i>                                   | -2,193527468 | 1,06e-06   |
| Sulfatase 2                                                                                                                                                   | <i>Sulf2</i>                                   | -2,190974349 | 4,57e-06   |
| Stem-loop binding protein                                                                                                                                     | <i>Slbp</i>                                    | -2,189730695 | 2,12e-05   |
| Choline kinase beta                                                                                                                                           | <i>Chkb</i>                                    | -2,188915186 | 4,50e-07   |
| Abhydrolase domain containing 8                                                                                                                               | <i>Abhd8</i>                                   | -2,18447413  | 6,85e-06   |
| Regulating synaptic membrane exocytosis 2                                                                                                                     | <i>Rims2</i>                                   | -2,183261531 | 0,0064031  |

|                                                                                                                     |                              |              |            |
|---------------------------------------------------------------------------------------------------------------------|------------------------------|--------------|------------|
| Dachshund 1 (drosophila)                                                                                            | <i>Dach1</i>                 | -2,182372486 | 3,82e-06   |
| Evi2a-evi2b readthrough /// ecotropic viral integration site 2b                                                     | <i>Evi2a-evi2b /// evi2b</i> | -2,176310294 | 0,00032218 |
| Cyclin g1                                                                                                           | <i>Ccng1</i>                 | -2,175935911 | 0,00504489 |
| Mus musculus cDNA, clone:y1g0142j18, strand:unspecified. /// minichromosome maintenance deficient 3 (s. Cerevisiae) | <i>Ak205147 /// mcm3</i>     | -2,175920283 | 0,00940433 |
| Interferon-induced protein with tetratricopeptide repeats 2                                                         | <i>Ifit2</i>                 | -2,169897722 | 7,30e-07   |
| Contactin 3                                                                                                         | <i>Cntn3</i>                 | -2,169375776 | 0,00019399 |
| Cap, adenylate cyclase-associated protein 1 (yeast)                                                                 | <i>Cap1</i>                  | -2,168944005 | 0,00010445 |
| Peripheral myelin protein 22                                                                                        | <i>Pmp22</i>                 | -2,166773636 | 5,48e-07   |
| Retinol dehydrogenase 11                                                                                            | <i>Rdh11</i>                 | -2,163735533 | 7,19e-05   |
| Guanine nucleotide binding protein, alpha 11                                                                        | <i>Gna11</i>                 | -2,15957789  | 2,60e-06   |
| Myosin ie                                                                                                           | <i>Myo1e</i>                 | -2,158500827 | 7,56e-06   |
| Pleckstrin homology domain-containing, family a (phosphoinositide binding specific) member 2                        | <i>Plekha2</i>               | -2,158032547 | 0,00014039 |
| Dual specificity phosphatase 9                                                                                      | <i>Dusp9</i>                 | -2,157645952 | 3,46e-05   |
| Integrin beta 2                                                                                                     | <i>Itgb2</i>                 | -2,155548418 | 1,15e-05   |
| Egf-like domain 7                                                                                                   | <i>Egfl7</i>                 | -2,155302121 | 0,00032461 |
| Epidermal growth factor receptor pathway substrate 8                                                                | <i>Eps8</i>                  | -2,146607783 | 5,82e-06   |
| Histidine triad nucleotide binding protein 3                                                                        | <i>Hint3</i>                 | -2,14485539  | 1,16e-05   |
| Keratin 8                                                                                                           | <i>Krt8</i>                  | -2,141919839 | 4,66e-06   |
| Nurim (nuclear envelope membrane protein)                                                                           | <i>Nrm</i>                   | -2,139979358 | 2,53e-06   |
| Aurora kinase a                                                                                                     | <i>Aurka</i>                 | -2,138493147 | 9,15e-06   |
| Colony stimulating factor 2 receptor, beta 2, low-affinity (granulocyte-macrophage)                                 | <i>Csf2rb2</i>               | -2,137836821 | 9,33e-05   |
| Early growth response 1                                                                                             | <i>Egr1</i>                  | -2,134356818 | 0,00736325 |
| Chondroitin sulfate n-acetylgalactosaminyltransferase 2                                                             | <i>Csgalnact2</i>            | -2,132736744 | 8,63e-06   |
| Transformed mouse 3t3 cell double minute 1                                                                          | <i>Mdm1</i>                  | -2,131972441 | 0,00050326 |
| Delta-like 1 (drosophila)                                                                                           | <i>Dll1</i>                  | -2,128991362 | 2,31e-06   |
| Growth associated protein 43                                                                                        | <i>Gap43</i>                 | -2,122597492 | 0,00127089 |
| Gap junction protein, gamma 1                                                                                       | <i>Gjc1</i>                  | -2,122576237 | 3,34e-06   |
| Geminin                                                                                                             | <i>Gmnn</i>                  | -2,122334839 | 1,75e-06   |
| Biogenesis of lysosomal organelles complex-1, subunit 1 /// retinol dehydrogenase 5                                 | <i>Bloc1s1 /// rdh5</i>      | -2,122115487 | 1,05e-05   |
| Chemokine (c-x-c motif) ligand 12                                                                                   | <i>Cxcl12</i>                | -2,119443526 | 1,19e-06   |
| Melanocyte proliferating gene 1                                                                                     | <i>Myg1</i>                  | -2,119093455 | 4,57e-06   |
| Grp1 (general receptor for phosphoinositides 1)-associated scaffold protein                                         | <i>Grasp</i>                 | -2,116459658 | 4,47e-05   |
| DNA segment, chr 17, human d6s56e 5                                                                                 | <i>D17h6s56e-5</i>           | -2,116005551 | 1,16e-06   |
| Retinitis pigmentosa GTPase regulator interacting protein 1                                                         | <i>Rpgrip1</i>               | -2,115369318 | 0,00607812 |
| Muscleblind-like 3 (drosophila)                                                                                     | <i>Mbnl3</i>                 | -2,114596938 | 4,73e-05   |
| ATP citrate lyase                                                                                                   | <i>Acly</i>                  | -2,114276344 | 1,42e-06   |
| Hematological and neurological expressed sequence 1                                                                 | <i>Hn1</i>                   | -2,114011392 | 3,56e-06   |

|                                                                                                      |                                                      |              |            |
|------------------------------------------------------------------------------------------------------|------------------------------------------------------|--------------|------------|
| Solute carrier family 25 (mitochondrial carrier, dicarboxylate transporter), member 10               | <i>Slc25a10</i>                                      | -2,113771658 | 1,11e-05   |
| 2,3-bisphosphoglycerate mutase                                                                       | <i>Bpgm</i>                                          | -2,111509574 | 0,00054193 |
| A disintegrin and metallopeptidase domain 8                                                          | <i>Adam8</i>                                         | -2,10977261  | 5,27e-06   |
| Collagen, type vi, alpha 2                                                                           | <i>Col6a2</i>                                        | -2,107457805 | 0,00049942 |
| Peptidase inhibitor 15                                                                               | <i>Pi15</i>                                          | -2,106369162 | 2,30e-05   |
| Replication protein a3                                                                               | <i>Rpa3</i>                                          | -2,104901925 | 5,18e-06   |
| Cyclin-dependent kinase 2                                                                            | <i>Cdk2</i>                                          | -2,104876788 | 6,95e-05   |
| Arginine vasopressin-induced 1                                                                       | <i>Avpi1</i>                                         | -2,102451112 | 6,73e-06   |
| Growth factor receptor bound protein 14                                                              | <i>Grb14</i>                                         | -2,100184079 | 0,00083685 |
| Calmodulin 1 /// calmodulin 2 /// calmodulin 3                                                       | <i>Calm1</i> /// <i>calm2</i> /// <i>calm3</i>       | -2,099860603 | 1,72e-06   |
| Predicted gene 12816 /// predicted gene 5879 /// ribosomal protein l3                                | <i>Gm12816</i> /// <i>gm5879</i> /// <i>rpl3</i>     | -2,099760641 | 0,00010356 |
| Interferon induced with helicase c domain 1                                                          | <i>Ifih1</i>                                         | -2,098914205 | 0,0004947  |
| Methionine sulfoxide reductase b2                                                                    | <i>Msrb2</i>                                         | -2,096901543 | 1,38e-05   |
| Sprouty homolog 2 (drosophila)                                                                       | <i>Spry2</i>                                         | -2,096825856 | 2,88e-05   |
| Map7 domain containing 1                                                                             | <i>Map7d1</i>                                        | -2,095981123 | 5,04e-06   |
| Aspartate-beta-hydroxylase                                                                           | <i>Asph</i>                                          | -2,095465815 | 5,30e-05   |
| Vacuolar protein sorting 53 (yeast)                                                                  | <i>Vps53</i>                                         | -2,094888365 | 0,00024075 |
| Dna segment, chr 10, wayne state university 102, expressed                                           | <i>D10wsu102e</i>                                    | -2,094846649 | 6,71e-06   |
| Myosin, heavy polypeptide 9, non-muscle                                                              | <i>Myh9</i>                                          | -2,09389625  | 0,00041294 |
| Kruppel-like factor 5                                                                                | <i>Klf5</i>                                          | -2,093339831 | 4,01e-05   |
| Plectin                                                                                              | <i>Plec</i>                                          | -2,093039251 | 4,29e-05   |
| Histone deacetylase 5                                                                                | <i>Hdac5</i>                                         | -2,091972284 | 6,71e-06   |
| Neural precursor cell expressed, developmentally down-regulated gene 1                               | <i>Nedd1</i>                                         | -2,090730397 | 0,00336632 |
| Ethanolamine kinase 1                                                                                | <i>Etnk1</i>                                         | -2,088374009 | 0,00299293 |
| Cyclin d1                                                                                            | <i>Ccnd1</i>                                         | -2,084936644 | 6,32e-06   |
| Glycoprotein (transmembrane) nmb                                                                     | <i>Gpnm</i>                                          | -2,084646733 | 7,68e-07   |
| G two s phase expressed protein 1                                                                    | <i>Gtse1</i>                                         | -2,082132158 | 1,36e-05   |
| Dnaj (hsp40) homolog, subfamily a, member 4                                                          | <i>Dnaja4</i>                                        | -2,081955908 | 9,02e-06   |
| Osteomodulin                                                                                         | <i>Omd</i>                                           | -2,081828464 | 1,13e-05   |
| Ring finger protein 145                                                                              | <i>Rnf145</i>                                        | -2,080074725 | 1,87e-06   |
| Transforming, acidic coiled-coil containing protein 3                                                | <i>Tacc3</i>                                         | -2,078548223 | 2,96e-06   |
| Pannexin 1                                                                                           | <i>Panx1</i>                                         | -2,078464226 | 9,89e-07   |
| Small proline-rich protein 2a1 /// small proline-rich protein 2a2 /// small proline-rich protein 2a3 | <i>Sprp2a1</i> /// <i>sprp2a2</i> /// <i>sprp2a3</i> | -2,077171246 | 8,90e-06   |
| Mitogen-activated protein kinase kinase kinase 7                                                     | <i>Map3k7</i>                                        | -2,076158187 | 0,00518708 |
| Intraflagellar transport 27                                                                          | <i>Ifi27</i>                                         | -2,075300777 | 2,00e-05   |
| Tubulin, alpha 1a                                                                                    | <i>Tuba1a</i>                                        | -2,073178439 | 4,42e-06   |
| Isocitrate dehydrogenase 1 (nadp+), soluble                                                          | <i>Idh1</i>                                          | -2,067174841 | 0,00016874 |
| Sec24 related gene family, member d (s. Cerevisiae)                                                  | <i>Sec24d</i>                                        | -2,066482452 | 2,87e-06   |
| Predicted gene 9817                                                                                  | <i>Gm9817</i>                                        | -2,066240946 | 0,00792638 |
| Protein-tyrosine sulfotransferase 1                                                                  | <i>Tpst1</i>                                         | -2,064974853 | 6,53e-07   |
| Transferrin receptor                                                                                 | <i>Tfrc</i>                                          | -2,061967437 | 0,00310664 |

|                                                                                           |                          |              |            |
|-------------------------------------------------------------------------------------------|--------------------------|--------------|------------|
| Isochorismatase domain containing 1                                                       | <i>Isoc1</i>             | -2,059528527 | 6,46e-05   |
| Peroxiredoxin 1 pseudogene /// peroxiredoxin 1                                            | <i>Gm21399 /// prdx1</i> | -2,057054633 | 0,00010632 |
| Nucleoporin 107                                                                           | <i>Nup107</i>            | -2,055016337 | 8,40e-07   |
| Acetyl-coenzyme a acetyltransferase 1                                                     | <i>Acat1</i>             | -2,053054222 | 4,43e-06   |
| G protein-coupled receptor kinase 5                                                       | <i>Grk5</i>              | -2,051203045 | 8,87e-05   |
| Expressed sequence aa408251                                                               | <i>Aa408251</i>          | -2,051024175 | 0,0013272  |
| C-myc binding protein                                                                     | <i>Mycbp</i>             | -2,050133537 | 6,27e-05   |
| Zinc finger protein 68                                                                    | <i>Zfp68</i>             | -2,047815262 | 1,12e-05   |
| Centromere protein k                                                                      | <i>Cenpk</i>             | -2,044828064 | 2,53e-06   |
| Non-smc condensin i complex, subunit h                                                    | <i>Ncaph</i>             | -2,044275959 | 1,79e-06   |
| Ahnak nucleoprotein (desmoyokin)                                                          | <i>Ahnak</i>             | -2,043444732 | 1,63e-06   |
| Rad21 homolog (s. Pombe)                                                                  | <i>Rad21</i>             | -2,04325496  | 0,00045025 |
| Membrane protein, palmitoylated 6 (maguk p55 subfamily member 6)                          | <i>Mpp6</i>              | -2,041616915 | 2,70e-06   |
| Family with sequence similarity 19, member a5                                             | <i>Fam19a5</i>           | -2,040810486 | 7,02e-07   |
| Stimulated by retinoic acid gene 6                                                        | <i>Stra6</i>             | -2,040244949 | 8,33e-05   |
| Coiled coil domain containing 88a                                                         | <i>Ccdc88a</i>           | -2,038678171 | 3,25e-06   |
| Daz associated protein 1                                                                  | <i>Dazap1</i>            | -2,038349312 | 6,03e-06   |
| Splicing factor proline/glutamine rich (polypyrimidine tract binding protein associated)  | <i>Sfpq</i>              | -2,036748317 | 1,13e-05   |
| Fyve, rhogef and ph domain containing 6                                                   | <i>Fgd6</i>              | -2,035562197 | 0,00019365 |
| Topoisomerase (dna) ii alpha                                                              | <i>Top2a</i>             | -2,034343961 | 8,28e-07   |
| Translocator protein                                                                      | <i>Tspo</i>              | -2,033718477 | 2,87e-05   |
| Vacuolar protein sorting 4a (yeast)                                                       | <i>Vps4a</i>             | -2,032170612 | 2,28e-06   |
| Potassium channel, subfamily k, member 2                                                  | <i>Kcnk2</i>             | -2,03199892  | 4,10e-06   |
| Collagen, type xii, alpha 1                                                               | <i>Col12a1</i>           | -2,031795172 | 0,00038123 |
| Brain-specific angiogenesis inhibitor 1-associated protein 2                              | <i>Baiap2</i>            | -2,030616616 | 4,42e-06   |
| Protein phosphatase 1, catalytic subunit, gamma isoform                                   | <i>Ppp1cc</i>            | -2,027161595 | 8,24e-06   |
| Excision repair cross-complementing rodent repair deficiency complementation group 6 like | <i>Ercc6l</i>            | -2,026852662 | 2,17e-06   |
| Cyclin-dependent kinase 1                                                                 | <i>Cdk1</i>              | -2,025929721 | 8,75e-07   |
| Riken cdna 4930429b21 gene                                                                | <i>4930429b21rik</i>     | -2,025248845 | 3,02e-05   |
| Spindle and kinetochore associated complex subunit 2                                      | <i>Ska2</i>              | -2,024605895 | 2,95e-05   |
| Dual oxidase maturation factor 1                                                          | <i>Duoxa1</i>            | -2,024151185 | 1,08e-05   |
| S-phase kinase-associated protein 2 (p45)                                                 | <i>Skp2</i>              | -2,024018945 | 1,87e-05   |
| Ets variant 4                                                                             | <i>Etv4</i>              | -2,022072742 | 1,60e-05   |
| Retinoblastoma-like 1 (p107)                                                              | <i>Rbl1</i>              | -2,021728914 | 1,95e-05   |
| Transmembrane protein 109                                                                 | <i>Tmem109</i>           | -2,021489176 | 3,02e-06   |
| Essential meiotic endonuclease 1 homolog 1 (s. Pombe)                                     | <i>Eme1</i>              | -2,020822487 | 1,51e-05   |
| Homeobox b6                                                                               | <i>Hoxb6</i>             | -2,020698434 | 3,36e-05   |
| Cyclin b1 /// predicted gene 5593                                                         | <i>Ccnb1 /// gm5593</i>  | -2,019734798 | 3,04e-05   |
| Integrin beta 7                                                                           | <i>Itgb7</i>             | -2,018973901 | 4,23e-06   |
| Hyaluronan mediated motility receptor (rhamm)                                             | <i>Hmmr</i>              | -2,018682708 | 1,87e-06   |



|                                                                                       |                        |              |            |
|---------------------------------------------------------------------------------------|------------------------|--------------|------------|
| Zinc finger, fyve domain containing 27                                                | <i>Zfyve27</i>         | -2,016951959 | 9,71e-06   |
| Homeobox b5                                                                           | <i>Hoxb5</i>           | -2,0159237   | 0,00044908 |
| Zxd family zinc finger c                                                              | <i>Zxdc</i>            | -2,015783866 | 0,00176434 |
| Schlafen 8                                                                            | <i>Slfn8</i>           | -2,015259676 | 9,12e-06   |
| Calcitonin gene-related peptide-receptor component protein                            | <i>Crcp</i>            | -2,014138541 | 3,37e-06   |
| Glycoprotein ib, beta polypeptide                                                     | <i>Gp1bb</i>           | -2,012554488 | 0,00018056 |
| Replication factor c (activator 1) 3                                                  | <i>Rfc3</i>            | -2,012509908 | 3,69e-06   |
| Jun proto-oncogene                                                                    | <i>Jun</i>             | -2,011920576 | 1,36e-05   |
| Atlantin gtpase 3                                                                     | <i>Atl3</i>            | -2,008798158 | 0,00493576 |
| Nucleoporin 85                                                                        | <i>Nup85</i>           | -2,007689261 | 2,17e-05   |
| Nudix (nucleoside diphosphate linked moiety x)-type motif 4                           | <i>Nudt4</i>           | -2,007415018 | 7,44e-06   |
| Proliferating cell nuclear antigen                                                    | <i>Pcna</i>            | -2,005338064 | 2,67e-06   |
| Tissue inhibitor of metalloproteinase 3                                               | <i>Timp3</i>           | -2,005033411 | 2,35e-05   |
| Protein-l-isoaspartate (d-aspartate) o-methyltransferase 1                            | <i>Pcmt1</i>           | -2,001967435 | 4,32e-06   |
| Enolase 2, gamma neuronal                                                             | <i>Eno2</i>            | -2,001347865 | 1,67e-05   |
| Budding uninhibited by benzimidazoles 1 homolog, beta (s. Cerevisiae)                 | <i>Bub1b</i>           | -2,001034588 | 4,67e-06   |
| Pax interacting (with transcription-activation domain) protein 1                      | <i>Paxip1</i>          | -1,99980978  | 1,17e-05   |
| Ran gtpase activating protein 1                                                       | <i>Rangap1</i>         | -1,999043429 | 0,00272266 |
| Zinc finger protein 386 (kruppel-like)                                                | <i>Zfp386</i>          | -1,997624463 | 2,35e-06   |
| Eomesodermin homolog (xenopus laevis)                                                 | <i>Eomes</i>           | -1,997408603 | 0,00061623 |
| Dynein, axonemal, heavy chain 11                                                      | <i>Dnah11</i>          | -1,99739658  | 0,00502083 |
| Ena-vasodilator stimulated phosphoprotein                                             | <i>Evl</i>             | -1,996816333 | 0,00018185 |
| Predicted gene 7846 /// lsm5 homolog, u6 small nuclear rna associated (s. Cerevisiae) | <i>Gm7846 /// lsm5</i> | -1,993123301 | 1,17e-05   |
| Coiled-coil domain containing 88c                                                     | <i>Ccdc88c</i>         | -1,991242058 | 1,31e-05   |
| Forkhead box m1                                                                       | <i>Foxm1</i>           | -1,99121071  | 2,73e-06   |
| Cdc28 protein kinase regulatory subunit 2                                             | <i>Cks2</i>            | -1,99110451  | 2,96e-06   |
| Histone deacetylase 2                                                                 | <i>Hdac2</i>           | -1,986777395 | 5,06e-06   |
| Mitochondrial fission regulator 2                                                     | <i>Mtfr2</i>           | -1,986270676 | 0,00030214 |
| Ubiquitin specific peptidase 2                                                        | <i>Usp2</i>            | -1,985362014 | 4,74e-05   |
| Spc25, ndc80 kinetochore complex component, homolog (s. Cerevisiae)                   | <i>Spc25</i>           | -1,984013203 | 3,70e-05   |
| Ubiquitin-like, containing phd and ring finger domains, 1                             | <i>Uhrf1</i>           | -1,981667385 | 1,27e-05   |
| Iq motif containing gtpase activating protein 3                                       | <i>Iqgap3</i>          | -1,978380823 | 3,37e-06   |
| Stomatin                                                                              | <i>Stom</i>            | -1,97832554  | 6,77e-06   |
| Casein kinase 1, gamma 2                                                              | <i>Csnk1g2</i>         | -1,978029298 | 8,61e-06   |
| Nucleoporin 37                                                                        | <i>Nup37</i>           | -1,975749999 | 3,39e-06   |
| Dysferlin                                                                             | <i>Dysf</i>            | -1,974675545 | 9,98e-06   |
| High mobility group box 3                                                             | <i>Hmgb3</i>           | -1,973918167 | 5,47e-05   |
| Cytochrome b5 reductase 3                                                             | <i>Cyb5r3</i>          | -1,972908056 | 0,00046364 |
| Sec61 alpha 1 subunit (s. Cerevisiae)                                                 | <i>Sec61a1</i>         | -1,972323148 | 0,00053103 |
| Prelid domain containing 1                                                            | <i>Prelid1</i>         | -1,9721468   | 1,79e-05   |

|                                                                           |                 |              |            |
|---------------------------------------------------------------------------|-----------------|--------------|------------|
| Mitogen-activated protein kinase kinase kinase 1                          | <i>Map3k1</i>   | -1,971929589 | 9,35e-05   |
| Zinc finger, cchc domain containing 6                                     | <i>Zcchc6</i>   | -1,96997726  | 3,36e-05   |
| Glycerol phosphate dehydrogenase 2, mitochondrial                         | <i>Gpd2</i>     | -1,967251732 | 5,48e-06   |
| Enoyl coenzyme a hydratase domain containing 2                            | <i>Echdc2</i>   | -1,966862165 | 6,95e-05   |
| Solute carrier family 9 (sodium/hydrogen exchanger), member 3 regulator 2 | <i>Slc9a3r2</i> | -1,9665776   | 0,00118838 |
| Eyes absent 3 homolog (drosophila)                                        | <i>Eya3</i>     | -1,966554468 | 6,05e-06   |
| Heterogeneous nuclear ribonucleoprotein a1                                | <i>Hnrnpa1</i>  | -1,96607742  | 2,68e-05   |
| V-ki-ras2 kirsten rat sarcoma viral oncogene homolog                      | <i>Kras</i>     | -1,965527579 | 7,02e-06   |
| Proteasome (prosome, macropain) activator subunit 4                       | <i>Psme4</i>    | -1,962281182 | 1,84e-05   |
| Basic transcription factor 3                                              | <i>Btf3</i>     | -1,961325548 | 0,00024891 |
| Chondroitin polymerizing factor 2                                         | <i>Chpf2</i>    | -1,954870722 | 0,00014877 |
| Single-pass membrane protein with aspartate rich tail 1                   | <i>Smdt1</i>    | -1,953712143 | 1,77e-06   |
| Sialophorin, pseudogene                                                   | <i>Spn-ps</i>   | -1,952008198 | 0,00013394 |
| Transportin 1                                                             | <i>Tnp1</i>     | -1,94872123  | 0,00710584 |
| Protein inhibitor of activated stat 3                                     | <i>Pias3</i>    | -1,947614416 | 7,13e-06   |
| Protein kinase, amp-activated, gamma 1 non-catalytic subunit              | <i>Prkg1</i>    | -1,947274572 | 1,14e-06   |
| Adp-ribosylation factor gtpase activating protein 3                       | <i>Arfgap3</i>  | -1,946812423 | 3,29e-06   |
| Eukaryotic translation initiation factor 2 alpha kinase 3                 | <i>Eif2ak3</i>  | -1,945575871 | 0,00030572 |
| Dedicator of cytokinesis 9                                                | <i>Dock9</i>    | -1,945310346 | 6,55e-06   |
| Fip1 like 1 (s. Cerevisiae)                                               | <i>Fip1l1</i>   | -1,943375249 | 4,10e-05   |
| Lamin b receptor                                                          | <i>Lbr</i>      | -1,942483218 | 1,96e-05   |
| Diaphanous homolog 3 (drosophila)                                         | <i>Diap3</i>    | -1,94135826  | 5,98e-05   |
| Insulin-like growth factor 2 receptor                                     | <i>Igf2r</i>    | -1,935067132 | 5,87e-06   |
| C-type lectin domain family 2, member d                                   | <i>Clec2d</i>   | -1,934506137 | 8,93e-05   |
| Meiosis-specific nuclear structural protein 1                             | <i>Mns1</i>     | -1,93352996  | 7,03e-06   |
| Polymerase i and transcript release factor                                | <i>Ptrf</i>     | -1,933197249 | 3,58e-06   |
| Vacuolar protein sorting 37b (yeast)                                      | <i>Vps37b</i>   | -1,933026779 | 6,57e-05   |
| Potassium channel tetramerisation domain containing 11                    | <i>Kctd11</i>   | -1,931088505 | 4,44e-05   |
| Transcription factor 3                                                    | <i>Tcf3</i>     | -1,930959294 | 7,15e-05   |
| Male-specific lethal 1 homolog (drosophila)                               | <i>Msl1</i>     | -1,929873945 | 2,57e-05   |
| Ankyrin repeat domain 54                                                  | <i>Ankrd54</i>  | -1,929014248 | 5,66e-06   |
| Coatomer protein complex, subunit zeta 1                                  | <i>Copz1</i>    | -1,928455064 | 1,25e-06   |
| Ubiquitin-like modifier activating enzyme 2                               | <i>Uba2</i>     | -1,928016601 | 0,00222985 |
| Cytochrome c oxidase subunit viic                                         | <i>Cox7c</i>    | -1,926668631 | 0,00010696 |
| Mitogen-activated protein kinase kinase 3                                 | <i>Map2k3</i>   | -1,925872988 | 3,42e-05   |
| Transcriptional regulator, sin3b (yeast)                                  | <i>Sin3b</i>    | -1,925116058 | 1,51e-05   |
| Phosphoribosyl pyrophosphate amidotransferase                             | <i>Ppat</i>     | -1,922106327 | 5,31e-05   |
| Protein regulator of cytokinesis 1                                        | <i>Prc1</i>     | -1,921406792 | 1,57e-06   |
| Y box protein 1                                                           | <i>Ybx1</i>     | -1,921296328 | 1,89e-06   |
| Ubiquitin specific peptidase 15                                           | <i>Usp15</i>    | -1,919163345 | 4,30e-06   |

|                                                                                                                         |                                                   |              |            |
|-------------------------------------------------------------------------------------------------------------------------|---------------------------------------------------|--------------|------------|
| Ran binding protein 17                                                                                                  | <i>Ranbp17</i>                                    | -1,917477454 | 0,00046487 |
| Homeobox b7 /// homeobox b8                                                                                             | <i>Hoxb7</i> /// <i>hoxb8</i>                     | -1,916966188 | 0,00900493 |
| Atpase, class vi, type 11a                                                                                              | <i>Atp11a</i>                                     | -1,916159521 | 3,94e-06   |
| Arp1 actin-related protein 1a, centractin alpha                                                                         | <i>Actr1a</i>                                     | -1,915915239 | 0,00012826 |
| Cyclin-dependent kinase 20                                                                                              | <i>Cdk20</i>                                      | -1,91566103  | 1,87e-06   |
| Udp-n-acetyl-alpha-d-galactosamine:polypeptide n-acetylgalactosaminyltransferase 1                                      | <i>Galnt1</i>                                     | -1,915367326 | 6,42e-06   |
| Polymerase (rna) iii (dna directed) polypeptide k                                                                       | <i>Polr3k</i>                                     | -1,914663948 | 2,78e-05   |
| Thymoma viral proto-oncogene 1                                                                                          | <i>Akt1</i>                                       | -1,914250943 | 1,21e-05   |
| Choline kinase beta /// chkb-cpt1b readthrough transcript (nmd candidate) /// carnitine palmitoyltransferase 1b, muscle | <i>Chkb</i> /// <i>chkbcpt1b</i> /// <i>cpt1b</i> | -1,913549413 | 5,44e-05   |
| Bromodomain adjacent to zinc finger domain, 1b                                                                          | <i>Baz1b</i>                                      | -1,913456474 | 0,00798276 |
| Dihydrofolate reductase                                                                                                 | <i>Dhfr</i>                                       | -1,912707213 | 4,37e-05   |
| Pq loop repeat containing                                                                                               | <i>Pqlc3</i>                                      | -1,911885586 | 2,13e-05   |
| Riken cdna 1110007c09 gene                                                                                              | <i>1110007c09rik</i>                              | -1,911420575 | 2,43e-05   |
| Acid phosphatase 1, soluble                                                                                             | <i>Acp1</i>                                       | -1,911356307 | 0,00139588 |
| Riken cdna 2610018g03 gene                                                                                              | <i>2610018g03rik</i>                              | -1,911172353 | 0,00026609 |
| Breast cancer 1                                                                                                         | <i>Brca1</i>                                      | -1,910306842 | 0,00012868 |
| Pdz and lim domain 4                                                                                                    | <i>Pdlim4</i>                                     | -1,91018287  | 1,04e-05   |
| Peroxisome proliferative activated receptor, gamma, coactivator 1 alpha                                                 | <i>Ppargc1a</i>                                   | -1,909816957 | 0,00055058 |
| Kazal-type serine peptidase inhibitor domain 1                                                                          | <i>Kazald1</i>                                    | -1,909391064 | 0,00063703 |
| Px domain containing serine/threonine kinase                                                                            | <i>Pxk</i>                                        | -1,907661552 | 2,29e-05   |
| Parathyroid hormone-like peptide                                                                                        | <i>Pthlh</i>                                      | -1,906880418 | 0,00061938 |
| Solute carrier family 44, member 1                                                                                      | <i>Slc44a1</i>                                    | -1,904722339 | 5,67e-06   |
| Glycine amidinotransferase (l-arginine:glycine amidinotransferase)                                                      | <i>Gatm</i>                                       | -1,904259656 | 0,00011112 |
| Calcium channel, voltage-dependent, t type, alpha 1g subunit                                                            | <i>Cacna1g</i>                                    | -1,903914973 | 0,00043488 |
| Rna binding protein, fox-1 homolog (c. Elegans) 2                                                                       | <i>Rbfox2</i>                                     | -1,903640687 | 1,47e-05   |
| Aly/ref export factor                                                                                                   | <i>Alyref</i>                                     | -1,903546297 | 8,23e-05   |
| Riken cdna 4932441j04 gene                                                                                              | <i>4932441j04rik</i>                              | -1,903316694 | 3,01e-05   |
| Centrin 3                                                                                                               | <i>Cetn3</i>                                      | -1,90298221  | 2,11e-06   |
| Purine-nucleoside phosphorylase                                                                                         | <i>Pnp</i>                                        | -1,901945631 | 5,43e-05   |
| Minichromosome maintenance deficient 7 (s. Cerevisiae)                                                                  | <i>Mcm7</i>                                       | -1,901504911 | 1,00e-05   |
| Gipc pdz domain containing family, member 2                                                                             | <i>Gipc2</i>                                      | -1,901042796 | 5,68e-05   |
| Carbohydrate sulfotransferase 11                                                                                        | <i>Chst11</i>                                     | -1,900182575 | 0,0005717  |
| Interferon regulatory factor 5                                                                                          | <i>Irf5</i>                                       | -1,894197948 | 0,00384007 |
| Heterogeneous nuclear ribonucleoprotein l-like                                                                          | <i>Hnrnp1l</i>                                    | -1,891979688 | 0,00012279 |
| Pan2 polya specific ribonuclease subunit homolog (s. Cerevisiae)                                                        | <i>Pan2</i>                                       | -1,89195369  | 0,00039971 |
| Glutamate dehydrogenase 1                                                                                               | <i>Glud1</i>                                      | -1,890809323 | 2,70e-05   |
| Adducin 3 (gamma)                                                                                                       | <i>Add3</i>                                       | -1,890708779 | 9,35e-06   |
| Mitochondrial pyruvate carrier 1                                                                                        | <i>Mpc1</i>                                       | -1,890706616 | 4,23e-05   |
| Glutamine fructose-6-phosphate transaminase 1                                                                           | <i>Gfpt1</i>                                      | -1,888837884 | 0,00041774 |

|                                                                                                            |                                                                     |              |            |
|------------------------------------------------------------------------------------------------------------|---------------------------------------------------------------------|--------------|------------|
| Lysm, putative peptidoglycan-binding, domain containing 3                                                  | <i>Lysmd3</i>                                                       | -1,888625398 | 0,00023995 |
| Ferm domain containing 6                                                                                   | <i>Frmd6</i>                                                        | -1,887906817 | 1,64e-06   |
| Calcium/calmodulin-dependent protein kinase ii, delta                                                      | <i>Camk2d</i>                                                       | -1,88715479  | 0,00014637 |
| Gap junction protein, beta 5                                                                               | <i>Gjb5</i>                                                         | -1,887012953 | 0,00023086 |
| V-ral simian leukemia viral oncogene homolog a (ras related)                                               | <i>Rala</i>                                                         | -1,884237775 | 1,69e-05   |
| S100 calcium binding protein a5                                                                            | <i>S100a5</i>                                                       | -1,883993623 | 8,72e-05   |
| Cathepsin e                                                                                                | <i>Ctse</i>                                                         | -1,882564228 | 0,00084432 |
| Polypyrimidine tract binding protein 1                                                                     | <i>Ptbp1</i>                                                        | -1,881776051 | 2,92e-06   |
| Flap structure specific endonuclease 1                                                                     | <i>Fen1</i>                                                         | -1,881674596 | 1,08e-05   |
| Ubiquitin-conjugating enzyme e2g 2                                                                         | <i>Ube2g2</i>                                                       | -1,881507598 | 0,00178458 |
| S100 calcium binding protein a3                                                                            | <i>S100a3</i>                                                       | -1,88148574  | 0,00083881 |
| Fanconi anemia, complementation group i                                                                    | <i>Fanci</i>                                                        | -1,880305427 | 7,13e-06   |
| Diacylglycerol kinase, alpha                                                                               | <i>Dgka</i>                                                         | -1,880023987 | 3,79e-05   |
| Bud31 homolog (yeast)                                                                                      | <i>Bud31</i>                                                        | -1,877479888 | 0,00115933 |
| Guanylate binding protein 4 /// guanylate-binding protein 8                                                | <i>Gbp4</i> /// <i>gbp8</i>                                         | -1,877346213 | 0,00567226 |
| Septin 6                                                                                                   | <i>Ix.06</i>                                                        | -1,874788907 | 0,00026059 |
| Polymerase (dna directed), alpha 2                                                                         | <i>Pola2</i>                                                        | -1,872558094 | 9,72e-06   |
| Riken cdna 4932431p20 gene /// predicted gene, 21596 /// predicted gene 6115 /// high mobility group box 1 | 4932431p20rik /// <i>gm21596</i> /// <i>gm6115</i> /// <i>hmgb1</i> | -1,871977255 | 0,00145522 |
| Transducer of erbb2, 2                                                                                     | <i>Tob2</i>                                                         | -1,871890199 | 0,00028651 |
| Rho guanine nucleotide exchange factor (gef) 28                                                            | <i>Arhgef28</i>                                                     | -1,871732448 | 1,38e-05   |
| Activated leukocyte cell adhesion molecule                                                                 | <i>Alcam</i>                                                        | -1,871593655 | 5,74e-06   |
| Riken cdna 2700089e24 gene                                                                                 | 2700089e24rik                                                       | -1,87136799  | 2,55e-05   |
| Colony stimulating factor 2 receptor, beta, low-affinity (granulocyte-macrophage)                          | <i>Csf2rb</i>                                                       | -1,869224049 | 0,00017428 |
| Rab21, member ras oncogene family                                                                          | <i>Rab21</i>                                                        | -1,86774846  | 4,25e-05   |
| D site albumin promoter binding protein                                                                    | <i>Dbp</i>                                                          | -1,867576703 | 3,22e-05   |
| Phd finger protein 20-like 1                                                                               | <i>Phf20l1</i>                                                      | -1,867264866 | 8,65e-05   |
| Lamin b2                                                                                                   | <i>Lmnb2</i>                                                        | -1,866625076 | 0,00012798 |
| Triosephosphate isomerase 1                                                                                | <i>Tpi1</i>                                                         | -1,862570482 | 3,29e-06   |
| Tata box binding protein (tbp)-associated factor, rna polymerase i, a                                      | <i>Taf1a</i>                                                        | -1,861992049 | 4,20e-05   |
| Proteasome (prosome, macropain) 26s subunit, atpase 3, interacting protein                                 | <i>Psmc3ip</i>                                                      | -1,860778262 | 2,94e-06   |
| Cell division cycle 6                                                                                      | <i>Cdc6</i>                                                         | -1,857095985 | 0,00066273 |
| Riken cdna 9130004c02 gene                                                                                 | 9130004c02rik                                                       | -1,85579622  | 0,00169653 |
| Nudix (nucleoside diphosphate linked moiety x)-type motif 21                                               | <i>Nudt21</i>                                                       | -1,85483688  | 2,31e-06   |
| Mus musculus cdna clone mgc:27981 image:3596365, complete cds.                                             | <i>Bc125002</i>                                                     | -1,854830869 | 0,00116435 |
| Low density lipoprotein receptor-related protein 8, apolipoprotein e receptor                              | <i>Lrp8</i>                                                         | -1,854466736 | 0,00131005 |
| Ribosomal protein s6 kinase, polypeptide 4                                                                 | <i>Rps6ka4</i>                                                      | -1,853495354 | 0,00640932 |
| Spindle apparatus coiled-coil protein 1                                                                    | <i>Spdl1</i>                                                        | -1,852963935 | 0,00012359 |

|                                                                        |                 |              |            |
|------------------------------------------------------------------------|-----------------|--------------|------------|
| Parathymosin                                                           | <i>Ptms</i>     | -1,852071479 | 0,00321198 |
| Poly(rc) binding protein 2                                             | <i>Pcbp2</i>    | -1,849709824 | 2,61e-06   |
| Homeobox a13                                                           | <i>Hoxa13</i>   | -1,849438534 | 2,42e-05   |
| Wd repeat domain 1                                                     | <i>Wdr1</i>     | -1,848379429 | 0,00061278 |
| Recombination signal binding protein for immunoglobulin kappa j region | <i>Rbpj</i>     | -1,848175266 | 9,66e-05   |
| ATPase, H <sup>+</sup> transporting, lysosomal v0 subunit e2           | <i>At6v0e2</i>  | -1,846402537 | 0,00068927 |
| Hydroxysteroid (17-beta) dehydrogenase 7                               | <i>Hsd17b7</i>  | -1,845448055 | 4,00e-05   |
| Notum pectinacetyl esterase homolog (Drosophila)                       | <i>Notum</i>    | -1,844287821 | 6,10e-05   |
| Ubiquitin specific peptidase 48                                        | <i>Usp48</i>    | -1,840774732 | 4,36e-05   |
| DNA methyltransferase (cytosine-5) 1                                   | <i>Dnmt1</i>    | -1,840211518 | 7,01e-06   |
| Kinesin family member 22                                               | <i>Kif22</i>    | -1,839152079 | 7,81e-06   |
| Ngfi-a binding protein 2                                               | <i>Nab2</i>     | -1,838918668 | 0,00143211 |
| Polymerase (DNA directed), delta 1, catalytic subunit                  | <i>Pold1</i>    | -1,83794894  | 0,00019474 |
| Centromere protein N                                                   | <i>Cenpn</i>    | -1,837264041 | 6,56e-06   |
| Chemokine-like factor                                                  | <i>Cklf</i>     | -1,836816662 | 0,00025026 |
| Microtubule associated serine/threonine kinase-like                    | <i>Mastl</i>    | -1,836800271 | 0,00188831 |
| Calcium/calmodulin-dependent protein kinase kinase 2, beta             | <i>Camkk2</i>   | -1,833820652 | 8,20e-05   |
| Integrin beta 3 binding protein (beta3-endonexin)                      | <i>Itgb3bp</i>  | -1,833740187 | 0,00050061 |
| Caspase 3                                                              | <i>Casp3</i>    | -1,832517866 | 0,00109072 |
| Limb-bud and heart                                                     | <i>Lbh</i>      | -1,832192756 | 0,00040461 |
| Protein kinase, AMP-activated, beta 1 non-catalytic subunit            | <i>Prkab1</i>   | -1,83143569  | 1,38e-05   |
| Zinc finger and BTB domain containing 45                               | <i>Zbtb45</i>   | -1,831030863 | 4,89e-06   |
| Transmembrane protein 184b                                             | <i>Tmem184b</i> | -1,830494347 | 3,29e-06   |
| ATPase, class VI, type 11c                                             | <i>At11c</i>    | -1,829730734 | 0,00530231 |
| Poly(A) binding protein, cytoplasmic 1                                 | <i>Pabpc1</i>   | -1,829616692 | 0,00240098 |
| Dead (ASP-Glu-Ala-ASP) box polypeptide 50                              | <i>Ddx50</i>    | -1,829015976 | 3,53e-06   |
| Origin recognition complex, subunit 6                                  | <i>Orc6</i>     | -1,828686037 | 4,88e-06   |
| Homeobox a10                                                           | <i>Hoxa10</i>   | -1,828113724 | 1,30e-05   |
| Contactin associated protein-like 4                                    | <i>Cntnap4</i>  | -1,827790372 | 0,0003978  |
| Budding uninhibited by benzimidazoles 1 homolog (S. cerevisiae)        | <i>Bub1</i>     | -1,827676405 | 1,27e-05   |
| ADP-ribosylation factor 3                                              | <i>Arf3</i>     | -1,825145167 | 7,62e-06   |
| Cysteine-rich hydrophobic domain 1                                     | <i>Chic1</i>    | -1,824522647 | 0,00030492 |
| Chondroitin sulfate proteoglycan 4                                     | <i>Cspg4</i>    | -1,823263472 | 1,87e-05   |
| Vesicular, overexpressed in cancer, pro-survival protein 1             | <i>Vopp1</i>    | -1,82316902  | 0,00010309 |
| Minichromosome maintenance deficient 2 mitotin (S. cerevisiae)         | <i>Mcm2</i>     | -1,820632774 | 5,12e-06   |
| Tar DNA binding protein                                                | <i>Tardbp</i>   | -1,819872835 | 0,00077909 |
| Heterogeneous nuclear ribonucleoprotein D-like                         | <i>Hnrnpdl</i>  | -1,819828635 | 6,99e-06   |
| Zinc finger, DHHC domain containing 2                                  | <i>Zdhhc2</i>   | -1,819810802 | 0,00538167 |
| Activating transcription factor 7 interacting protein 2                | <i>Atf7ip2</i>  | -1,819797377 | 0,00218402 |
| Inhibitor of DNA binding 2                                             | <i>Id2</i>      | -1,819597688 | 0,0002422  |
| Coiled-coil domain containing 25                                       | <i>Ccdc25</i>   | -1,819281923 | 0,00537852 |

|                                                                                           |                                              |              |            |
|-------------------------------------------------------------------------------------------|----------------------------------------------|--------------|------------|
| Paxillin                                                                                  | <i>Pxn</i>                                   | -1,819142037 | 0,00017533 |
| Homeobox b3                                                                               | <i>Hoxb3</i>                                 | -1,818867647 | 8,65e-05   |
| Sub1 homolog (s. Cerevisiae)                                                              | <i>Sub1</i>                                  | -1,818627665 | 2,45e-06   |
| Cell division cycle 25c                                                                   | <i>Cdc25c</i>                                | -1,817408336 | 1,31e-05   |
| Tubby-like protein 3                                                                      | <i>Tulp3</i>                                 | -1,814916316 | 3,79e-05   |
| Spermatogenesis associated, serine-rich 2                                                 | <i>Spats2</i>                                | -1,814571674 | 7,37e-06   |
| Polymerase (dna directed), epsilon                                                        | <i>Pole</i>                                  | -1,814168256 | 8,61e-06   |
| Mis18 kinetochore protein homolog a (s. Pombe)                                            | <i>Mis18a</i>                                | -1,812846371 | 8,20e-05   |
| Rab1b, member ras oncogene family                                                         | <i>Rab1b</i>                                 | -1,811507383 | 0,00015858 |
| Centromere protein o                                                                      | <i>Cenpo</i>                                 | -1,808451577 | 1,24e-05   |
| Map kinase-interacting serine/threonine kinase 2                                          | <i>Mknk2</i>                                 | -1,808148529 | 1,93e-05   |
| Trafficking protein particle complex 1                                                    | <i>Trappc1</i>                               | -1,808126334 | 1,14e-05   |
| Abhydrolase domain containing 17a                                                         | <i>Abhd17a</i>                               | -1,807543603 | 0,0001326  |
| Rad18 homolog (s. Cerevisiae)                                                             | <i>Rad18</i>                                 | -1,807419511 | 0,0016062  |
| Polymerase (dna-directed), delta interacting protein 3                                    | <i>Poldip3</i>                               | -1,807315403 | 2,71e-05   |
| Nuclear receptor subfamily 1, group d, member 1                                           | <i>Nr1d1</i>                                 | -1,807193285 | 0,00016281 |
| Origin recognition complex, subunit 1                                                     | <i>Orc1</i>                                  | -1,807106657 | 0,00223504 |
| Cold inducible rna binding protein                                                        | <i>Cirbp</i>                                 | -1,807005644 | 1,73e-05   |
| Nucleolar and spindle associated protein 1                                                | <i>Nusap1</i>                                | -1,806800153 | 4,27e-05   |
| Nucleoporin 155                                                                           | <i>Nup155</i>                                | -1,805788032 | 0,00022323 |
| Chromobox 3 /// predicted pseudogene 5792 /// predicted gene 6901 /// predicted gene 6917 | <i>Cbx3 /// gm5792 /// gm6901 /// gm6917</i> | -1,805516847 | 5,31e-05   |
| Dopachrome tautomerase                                                                    | <i>Dct</i>                                   | -1,805058225 | 0,00039416 |
| Solute carrier family 35, member e1                                                       | <i>Slc35e1</i>                               | -1,804947379 | 2,83e-05   |
| Interleukin 17 receptor a                                                                 | <i>Il17ra</i>                                | -1,80394716  | 0,00015992 |
| Sap30-like                                                                                | <i>Sap30l</i>                                | -1,803778008 | 8,08e-06   |
| Dek oncogene (dna binding)                                                                | <i>Dek</i>                                   | -1,801524739 | 1,39e-05   |
| Angiomotin                                                                                | <i>Amot</i>                                  | -1,801240917 | 0,00021108 |
| Proteasome (prosome, macropain) subunit, alpha type 7                                     | <i>Psm7</i>                                  | -1,800338639 | 2,79e-05   |
| Serine/arginine-rich splicing factor 4                                                    | <i>Srsf4</i>                                 | -1,800309823 | 1,68e-05   |
| Proline-rich coiled-coil 1                                                                | <i>Prrc1</i>                                 | -1,800275454 | 5,13e-05   |
| Glycophorin c                                                                             | <i>Gypc</i>                                  | -1,799219693 | 2,64e-05   |
| Rab29, member ras oncogene family                                                         | <i>Rab29</i>                                 | -1,798771637 | 0,00022091 |
| Replication protein a2                                                                    | <i>Rpa2</i>                                  | -1,798714529 | 0,0009822  |
| High mobility group box 2                                                                 | <i>Hmgb2</i>                                 | -1,798601496 | 2,21e-05   |
| Cell division cycle 25b                                                                   | <i>Cdc25b</i>                                | -1,798561259 | 0,0002077  |
| Matrix metalloproteinase 10                                                               | <i>Mmp10</i>                                 | -1,798500728 | 0,00015137 |
| Dis3 mitotic control homolog (s. Cerevisiae)                                              | <i>Dis3</i>                                  | -1,797687265 | 1,03e-05   |
| Proteasome (prosome, macropain) subunit, alpha type 2                                     | <i>Psm2</i>                                  | -1,794049036 | 1,06e-05   |
| Centrosomal protein 41                                                                    | <i>Cep41</i>                                 | -1,791888577 | 0,00082848 |
| Tubulin tyrosine ligase                                                                   | <i>Ttl</i>                                   | -1,791008353 | 0,00010992 |
| Polo-like kinase 1                                                                        | <i>Plk1</i>                                  | -1,790519506 | 4,79e-05   |
| Actinin alpha 4                                                                           | <i>Actn4</i>                                 | -1,790209489 | 1,11e-05   |

|                                                                 |                        |              |            |
|-----------------------------------------------------------------|------------------------|--------------|------------|
| Absent in melanoma 2                                            | <i>Aim2</i>            | -1,789429879 | 0,00033358 |
| Expressed sequence aa409749                                     | <i>Aa409749</i>        | -1,788974361 | 0,00170921 |
| Rap guanine nucleotide exchange factor (gef) 3                  | <i>Rapgef3</i>         | -1,788970433 | 0,00339483 |
| Ets variant 1 /// predicted gene 5454                           | <i>Etv1 /// gm5454</i> | -1,786671871 | 8,20e-06   |
| Hermansky-pudlak syndrome 1 homolog (human)                     | <i>Hps1</i>            | -1,785381868 | 4,43e-06   |
| Thioredoxin-related transmembrane protein 1                     | <i>Tmx1</i>            | -1,782842515 | 5,75e-05   |
| Meningioma expressed antigen 5 (hyaluronidase)                  | <i>Mgea5</i>           | -1,782721076 | 0,00025458 |
| Metastasis suppressor 1                                         | <i>Mtss1</i>           | -1,782709949 | 4,29e-05   |
| Ndc80 homolog, kinetochore complex component (s. Cerevisiae)    | <i>Ndc80</i>           | -1,782353933 | 6,07e-05   |
| Riken cdna c330027c09 gene                                      | <i>C330027c09rik</i>   | -1,780616107 | 0,00041153 |
| Laminin b1                                                      | <i>Lamb1</i>           | -1,778728403 | 2,08e-05   |
| Sperm associated antigen 5                                      | <i>Spag5</i>           | -1,778564449 | 0,0002612  |
| Coatomer protein complex, subunit gamma 1                       | <i>Copg1</i>           | -1,778280335 | 3,24e-06   |
| 2'-deoxynucleoside 5'-phosphate n-hydrolase 1                   | <i>Dnph1</i>           | -1,777040944 | 6,39e-06   |
| Ribose 5-phosphate isomerase a                                  | <i>Rpia</i>            | -1,774994871 | 1,80e-05   |
| Nanos homolog 1 (drosophila)                                    | <i>Nanos1</i>          | -1,772858293 | 0,00023954 |
| Transmembrane protein 43                                        | <i>Tmem43</i>          | -1,772857534 | 1,75e-05   |
| Cyclin n-terminal domain containing 1                           | <i>Cntd1</i>           | -1,772031637 | 0,0004717  |
| Replication factor c (activator 1) 2                            | <i>Rfc2</i>            | -1,770791197 | 6,09e-06   |
| Paired related homeobox 1                                       | <i>Prrx1</i>           | -1,770239839 | 0,00218848 |
| Beta galactoside alpha 2,6 sialyltransferase 1                  | <i>St6gal1</i>         | -1,768678561 | 1,48e-05   |
| Polymerase (dna directed), beta                                 | <i>Polb</i>            | -1,76696568  | 1,06e-05   |
| Ptk2 protein tyrosine kinase 2                                  | <i>Ptk2</i>            | -1,76692431  | 1,99e-05   |
| Asunder, spermatogenesis regulator                              | <i>Asun</i>            | -1,765023502 | 6,00e-05   |
| Integrator complex subunit 8                                    | <i>Ints8</i>           | -1,764290859 | 1,81e-05   |
| Dual specificity phosphatase 11 (rna/rnp complex 1-interacting) | <i>Dusp11</i>          | -1,761603277 | 0,00042608 |
| Adenosine deaminase, rna-specific, b1                           | <i>Adarb1</i>          | -1,761094836 | 0,00022539 |
| Trab domain containing                                          | <i>Trabd</i>           | -1,761001112 | 6,23e-05   |
| Receptor (calcitonin) activity modifying protein 2              | <i>Ramp2</i>           | -1,759742053 | 0,00198521 |
| Nudix (nucleoside diphosphate linked moiety x)-type motif 9     | <i>Nudt9</i>           | -1,757598096 | 1,29e-05   |
| Rab30, member ras oncogene family                               | <i>Rab30</i>           | -1,75743558  | 9,67e-06   |
| Zinc finger and scan domain containing 21                       | <i>Zscan21</i>         | -1,756858569 | 0,00945271 |
| Glutathione s-transferase kappa 1                               | <i>Gstk1</i>           | -1,75644151  | 0,00011588 |
| Family with sequence similarity 76, member a                    | <i>Fam76a</i>          | -1,756055251 | 5,76e-06   |
| Adenylate cyclase activating polypeptide 1                      | <i>Adcyap1</i>         | -1,754556738 | 0,00014109 |
| Chibby homolog 1 (drosophila)                                   | <i>Cby1</i>            | -1,753749826 | 4,51e-05   |
| Mediator complex subunit 30                                     | <i>Med30</i>           | -1,753564668 | 1,74e-05   |
| Riken cdna 2700029m09 gene                                      | <i>2700029m09rik</i>   | -1,753488584 | 6,39e-06   |
| Thioredoxin reductase 1                                         | <i>Txnrd1</i>          | -1,753204908 | 0,00751452 |
| O-acyl-adp-ribose deacylase 1                                   | <i>Oard1</i>           | -1,75253354  | 0,00014147 |
| Serum/glucocorticoid regulated kinase 1                         | <i>Sgk1</i>            | -1,751840763 | 0,00073724 |
| Membrane protein, palmitoylated                                 | <i>Mpp1</i>            | -1,751639102 | 0,00035476 |
| Sphingosine-1-phosphate phosphatase 1                           | <i>Sgpp1</i>           | -1,751546509 | 0,00791706 |

|                                                                                           |                                 |              |            |
|-------------------------------------------------------------------------------------------|---------------------------------|--------------|------------|
| Sterol-c5-desaturase (fungal erg3, delta-5-desaturase) homolog (s. Cerevisiae)            | <i>Sc5d</i>                     | -1,751435189 | 6,16e-05   |
| Mucolipin 2                                                                               | <i>Mcoln2</i>                   | -1,751223564 | 0,000537   |
| Serine/arginine-rich splicing factor 3                                                    | <i>Srsf3</i>                    | -1,749999633 | 0,00294339 |
| Pyrroline-5-carboxylate reductase family, member 2                                        | <i>Pycr2</i>                    | -1,749930713 | 1,03e-05   |
| Ring finger protein 183                                                                   | <i>Rnf183</i>                   | -1,748477938 | 8,17e-06   |
| Neuronal pentraxin 1                                                                      | <i>Nptx1</i>                    | -1,747658949 | 0,00018589 |
| Serine palmitoyltransferase, small subunit a                                              | <i>Sptssa</i>                   | -1,746029396 | 4,10e-05   |
| Predicted gene 5553 /// orm1-like 2 (s. Cerevisiae)                                       | <i>Gm5553 /// ormdl2</i>        | -1,745395429 | 4,76e-05   |
| Pleckstrin homology domain containing, family g (with rhogef domain) member 2             | <i>Plekkg2</i>                  | -1,745368619 | 0,00080384 |
| Oxysterol binding protein-like 6                                                          | <i>Osbp16</i>                   | -1,745256262 | 0,00229793 |
| Riken cdna 1700091h14 gene /// predicted gene 8068                                        | <i>1700091h14rik /// gm8068</i> | -1,744862738 | 9,81e-05   |
| Ribosomal protein s17                                                                     | <i>Rps17</i>                    | -1,742865723 | 4,79e-05   |
| Ubiquitin-conjugating enzyme e2c                                                          | <i>Ube2c</i>                    | -1,742850709 | 1,85e-05   |
| Citrate synthase                                                                          | <i>Cs</i>                       | -1,741153956 | 2,38e-05   |
| Serine palmitoyltransferase, long chain base subunit 1                                    | <i>Sptlc1</i>                   | -1,739935164 | 4,08e-05   |
| Microspherule protein 1                                                                   | <i>Mcrs1</i>                    | -1,739263964 | 4,81e-06   |
| Tubulin, alpha 4a                                                                         | <i>Tuba4a</i>                   | -1,738609728 | 5,44e-05   |
| Mis18 binding protein 1                                                                   | <i>Mis18bp1</i>                 | -1,737812118 | 2,30e-05   |
| Ect2 oncogene                                                                             | <i>Ect2</i>                     | -1,737582834 | 0,00113293 |
| Signal sequence receptor, alpha                                                           | <i>Ssr1</i>                     | -1,735080819 | 0,00170003 |
| Nhp2-like protein 1-like /// nhp2 non-histone chromosome protein 2-like 1 (s. Cerevisiae) | <i>Loc100862468 /// nhp2l1</i>  | -1,734780025 | 1,03e-05   |
| Riken cdna 2700094k13 gene                                                                | <i>2700094k13rik</i>            | -1,734774649 | 3,65e-05   |
| Diras family, gtp-binding ras-like 1                                                      | <i>Diras1</i>                   | -1,734563339 | 0,00022681 |
| Histidine ammonia lyase                                                                   | <i>Hal</i>                      | -1,733825729 | 0,00016522 |
| Ubiquitin domain containing 1                                                             | <i>Ubttd1</i>                   | -1,733236428 | 4,60e-05   |
| Kinesin family member c1                                                                  | <i>Kifc1</i>                    | -1,731027393 | 0,00146186 |
| Glutamic acid decarboxylase 2                                                             | <i>Gad2</i>                     | -1,728391223 | 7,03e-06   |
| Ataxin 10                                                                                 | <i>Atxn10</i>                   | -1,727536252 | 0,00118206 |
| Asp (abnormal spindle)-like, microcephaly associated (drosophila)                         | <i>Aspm</i>                     | -1,727157266 | 3,74e-05   |
| Letm1 domain containing 1                                                                 | <i>Letmd1</i>                   | -1,727144665 | 0,00017213 |
| Calcium/calmodulin-dependent serine protein kinase (maguk family)                         | <i>Cask</i>                     | -1,725401265 | 0,00110473 |
| Importin 8                                                                                | <i>Ipo8</i>                     | -1,724627444 | 0,00070442 |
| Transmembrane protein 129                                                                 | <i>Tmem129</i>                  | -1,723730988 | 7,77e-06   |
| Fatty acid desaturase 1                                                                   | <i>Fads1</i>                    | -1,72370375  | 2,62e-05   |
| Family with sequence similarity 83, member g                                              | <i>Fam83g</i>                   | -1,723475838 | 3,07e-05   |
| Polymerase (dna directed), alpha 1                                                        | <i>Pola1</i>                    | -1,722883137 | 0,00016604 |
| Wnt1 inducible signaling pathway protein 1                                                | <i>Wisp1</i>                    | -1,722250835 | 9,67e-06   |
| Isy1 splicing factor homolog (s. Cerevisiae)                                              | <i>Isy1</i>                     | -1,722225051 | 0,00030518 |
| Kdel (lys-asp-glu-leu) endoplasmic reticulum protein retention receptor 3                 | <i>Kdelr3</i>                   | -1,72183364  | 5,99e-05   |
| Timeless circadian clock 1                                                                | <i>Timeless</i>                 | -1,721218685 | 1,42e-05   |



|                                                                                                   |                        |              |            |
|---------------------------------------------------------------------------------------------------|------------------------|--------------|------------|
| Timeless interacting protein                                                                      | <i>Tipin</i>           | -1,720322314 | 4,88e-05   |
| Tubulin alpha, related sequence 1                                                                 | <i>Tuba-rs1</i>        | -1,719147633 | 0,0003242  |
| H2a histone family, member x                                                                      | <i>H2afx</i>           | -1,719136056 | 2,99e-05   |
| Riken cdna b930041f14 gene                                                                        | <i>B930041f14rik</i>   | -1,718808726 | 5,23e-05   |
| Potassium intermediate/small conductance calcium-activated channel, subfamily n, member 4         | <i>Kcnn4</i>           | -1,718736759 | 4,18e-05   |
| Gtp binding protein 1                                                                             | <i>Gtpbp1</i>          | -1,717806775 | 2,77e-05   |
| Dynactin 1                                                                                        | <i>Dctn1</i>           | -1,717421226 | 0,00013481 |
| Enhancer of yellow 2 homolog (drosophila)                                                         | <i>Eny2</i>            | -1,716723202 | 7,86e-06   |
| Tho complex 1                                                                                     | <i>Thoc1</i>           | -1,716078554 | 0,00512761 |
| Riken cdna 0610007p14 gene                                                                        | <i>0610007p14rik</i>   | -1,715485409 | 5,02e-06   |
| Syntaxin 1a (brain)                                                                               | <i>Stx1a</i>           | -1,715317836 | 0,0022275  |
| Sprouty protein with evh-1 domain 1, related sequence                                             | <i>Spred1</i>          | -1,714816086 | 1,36e-05   |
| Checkpoint kinase 2                                                                               | <i>Chek2</i>           | -1,714291032 | 0,00039134 |
| Caveolin 1, caveolae protein                                                                      | <i>Cav1</i>            | -1,714268086 | 6,95e-06   |
| Protein phosphatase 1, catalytic subunit, alpha isoform                                           | <i>Ppp1ca</i>          | -1,713873928 | 4,57e-06   |
| Zinc finger protein 467                                                                           | <i>Zfp467</i>          | -1,713840079 | 0,00012863 |
| Msh homeobox 1                                                                                    | <i>Msx1</i>            | -1,713785    | 0,0001142  |
| Riken cdna 1110006o24 gene                                                                        | <i>1110006o24rik</i>   | -1,713502855 | 0,00214075 |
| Dopa decarboxylase                                                                                | <i>Ddc</i>             | -1,71331246  | 0,00033641 |
| Acyl-coa synthetase short-chain family member 2                                                   | <i>Acss2</i>           | -1,712706169 | 0,0003789  |
| Abhydrolase domain containing 5                                                                   | <i>Abhd5</i>           | -1,712523155 | 2,51e-05   |
| Core 1 synthase, glycoprotein-n-acetylgalactosamine 3-beta-galactosyltransferase, 1               | <i>C1galt1</i>         | -1,712448213 | 0,0001452  |
| Paired related homeobox 2                                                                         | <i>Prrx2</i>           | -1,711255169 | 0,0003276  |
| Ergic and golgi 2                                                                                 | <i>Ergic2</i>          | -1,710084398 | 6,99e-05   |
| Activating transcription factor 1 /// predicted pseudogene 1862                                   | <i>Atf1 /// gm1862</i> | -1,710040034 | 2,78e-05   |
| Postmeiotic segregation increased 2 (s. Cerevisiae)                                               | <i>Pms2</i>            | -1,709618637 | 6,22e-05   |
| Phenylalkylamine ca2+ antagonist (emopamil) binding protein                                       | <i>Ebp</i>             | -1,709376282 | 3,94e-05   |
| Core binding factor beta                                                                          | <i>Cbfb</i>            | -1,708798929 | 0,00030483 |
| Ctf18, chromosome transmission fidelity factor 18                                                 | <i>Chtf18</i>          | -1,70754543  | 4,96e-05   |
| Cd33 antigen                                                                                      | <i>Cd33</i>            | -1,707408172 | 0,00566045 |
| Swi/snf related, matrix associated, actin dependent regulator of chromatin, subfamily d, member 2 | <i>Smarcd2</i>         | -1,70733158  | 2,75e-05   |
| Tissue inhibitor of metalloproteinase 2                                                           | <i>Timp2</i>           | -1,706572823 | 0,00699317 |
| Eukaryotic translation initiation factor 2, subunit 1 alpha                                       | <i>Eif2s1</i>          | -1,706293015 | 7,20e-05   |
| Myeloid cell leukemia sequence 1                                                                  | <i>Mcl1</i>            | -1,706078598 | 0,00046595 |
| Phosphatidic acid phosphatase type 2a                                                             | <i>Ppap2a</i>          | -1,705881189 | 0,00015277 |
| High mobility group nucleosomal binding domain 3                                                  | <i>Hmgn3</i>           | -1,703694499 | 0,0001243  |
| Transmembrane 4 superfamily member 1                                                              | <i>Tm4sf1</i>          | -1,703688804 | 1,17e-05   |
| Ubiquitin-conjugating enzyme e2j 1                                                                | <i>Ube2j1</i>          | -1,703115137 | 2,58e-05   |
| Zinc finger, dhhc domain containing 6                                                             | <i>Zdhhc6</i>          | -1,702917658 | 0,00011103 |
| Lipin 1                                                                                           | <i>Lpin1</i>           | -1,701983296 | 3,12e-05   |

|                                                                                                                                                                                                             |                                                                    |              |            |
|-------------------------------------------------------------------------------------------------------------------------------------------------------------------------------------------------------------|--------------------------------------------------------------------|--------------|------------|
| Predicted gene 7040 /// prolactin family 2, subfamily c, member 2 /// prolactin family 2, subfamily c, member 3 /// prolactin family 2, subfamily c, member 4 /// prolactin family 2, subfamily c, member 5 | <i>Gm7040 /// prl2c2 /// prl2c3 /// prl2c4 /// prl2c5</i>          | -1,700037595 | 0,00039126 |
| Atp/gtp binding protein-like 5                                                                                                                                                                              | <i>Agbl5</i>                                                       | -1,699908143 | 0,00911704 |
| Golgi to er traffic protein 4 homolog (s. Cerevisiae)                                                                                                                                                       | <i>Get4</i>                                                        | -1,699851153 | 1,34e-05   |
| Methyltransferase like 3                                                                                                                                                                                    | <i>Mettl3</i>                                                      | -1,699087387 | 7,41e-05   |
| Lsm3 homolog, u6 small nuclear rna associated (s. Cerevisiae)                                                                                                                                               | <i>Lsm3</i>                                                        | -1,698725695 | 2,30e-05   |
| Pituitary tumor-transforming gene 1                                                                                                                                                                         | <i>Pttg1</i>                                                       | -1,697733998 | 1,33e-05   |
| Small nuclear ribonucleoprotein polypeptide a'                                                                                                                                                              | <i>Snrpa1</i>                                                      | -1,697725967 | 4,95e-05   |
| Budding uninhibited by benzimidazoles 3 homolog (s. Cerevisiae)                                                                                                                                             | <i>Bub3</i>                                                        | -1,697486179 | 0,00178975 |
| Translocating chain-associating membrane protein 1                                                                                                                                                          | <i>Tram1</i>                                                       | -1,697037018 | 7,56e-06   |
| Mitogen-activated protein kinase kinase kinase 5                                                                                                                                                            | <i>Map3k5</i>                                                      | -1,696477984 | 0,00023079 |
| Hnrnp-associated with lethal yellow                                                                                                                                                                         | <i>Raly</i>                                                        | -1,694923967 | 1,21e-05   |
| Tetratricopeptide repeat domain 8                                                                                                                                                                           | <i>Ttc8</i>                                                        | -1,694298633 | 8,58e-05   |
| Elovl family member 5, elongation of long chain fatty acids (yeast)                                                                                                                                         | <i>Elovl5</i>                                                      | -1,693502825 | 0,00018798 |
| Thyroid hormone receptor interactor 13                                                                                                                                                                      | <i>Trip13</i>                                                      | -1,693031723 | 0,00040371 |
| Midnolin                                                                                                                                                                                                    | <i>Midn</i>                                                        | -1,691533773 | 0,00014358 |
| Predicted gene 13305 /// predicted gene 2002 /// interleukin 11 receptor, alpha chain 1 /// interleukin 11 receptor, alpha chain 2 /// interleukin-11 receptor subunit alpha-2-like                         | <i>Gm13305 /// gm2002 /// il11ra1 /// il11ra2 /// loc100861969</i> | -1,691174111 | 5,68e-05   |
| Fk506 binding protein 5                                                                                                                                                                                     | <i>Fkbp5</i>                                                       | -1,691062644 | 1,60e-05   |
| Ring finger protein 10                                                                                                                                                                                      | <i>Rnf10</i>                                                       | -1,690706794 | 0,00011859 |
| Nuclear factor of activated t cells, cytoplasmic, calcineurin dependent 1                                                                                                                                   | <i>Nfatc1</i>                                                      | -1,690158344 | 2,56e-05   |
| Ras homolog gene family, member v                                                                                                                                                                           | <i>Rhov</i>                                                        | -1,6893374   | 0,00042846 |
| Unc-119 homolog b (c. Elegans)                                                                                                                                                                              | <i>Unc119b</i>                                                     | -1,689074    | 1,67e-05   |
| Carboxypeptidase n, polypeptide 1                                                                                                                                                                           | <i>Cpn1</i>                                                        | -1,688396787 | 0,00078127 |
| Dnaj (hsp40) homolog, subfamily c, member 12                                                                                                                                                                | <i>Dnajc12</i>                                                     | -1,688393521 | 0,00033581 |
| Purine-nucleoside phosphorylase /// purine-nucleoside phosphorylase 2                                                                                                                                       | <i>Pnp /// pnp2</i>                                                | -1,687950835 | 0,0016913  |
| Deoxyguanosine kinase                                                                                                                                                                                       | <i>Dguok</i>                                                       | -1,687856211 | 0,00016071 |
| Lysosomal-associated protein transmembrane 4b                                                                                                                                                               | <i>Laptm4b</i>                                                     | -1,687605217 | 6,39e-05   |
| Dna segment, chr 8, wayne state university 26, expressed                                                                                                                                                    | <i>D8wsu26e</i>                                                    | -1,687537786 | 0,00977387 |
| Adenomatosis polyposis coli down-regulated 1                                                                                                                                                                | <i>Apcdd1</i>                                                      | -1,686979893 | 9,16e-05   |
| Testicular cell adhesion molecule 1                                                                                                                                                                         | <i>Tcam1</i>                                                       | -1,686504801 | 0,00017207 |
| Golgi-specific brefeldin a-resistance factor 1                                                                                                                                                              | <i>Gbf1</i>                                                        | -1,686404045 | 9,15e-05   |
| Cox assembly mitochondrial protein 2                                                                                                                                                                        | <i>Cmc2</i>                                                        | -1,685747564 | 1,81e-05   |
| Mkl (megakaryoblastic leukemia)/myocardin-like 1                                                                                                                                                            | <i>Mkl1</i>                                                        | -1,685507676 | 6,18e-05   |
| 3'-phosphoadenosine 5'-phosphosulfate synthase 1                                                                                                                                                            | <i>Papss1</i>                                                      | -1,685242096 | 5,06e-05   |
| Periplakin                                                                                                                                                                                                  | <i>Ppl</i>                                                         | -1,684490544 | 0,00396981 |
| Adenosine deaminase, trna-specific 2                                                                                                                                                                        | <i>Adat2</i>                                                       | -1,684435699 | 0,00031185 |

|                                                                                                                                                 |                                                    |              |            |
|-------------------------------------------------------------------------------------------------------------------------------------------------|----------------------------------------------------|--------------|------------|
| Solute carrier family 26 (sulfate transporter), member 2                                                                                        | <i>Slc26a2</i>                                     | -1,684272372 | 0,00019419 |
| Karyopherin (importin) alpha 2                                                                                                                  | <i>Kpna2</i>                                       | -1,683977538 | 6,48e-05   |
| Tgfb-induced factor homeobox 2                                                                                                                  | <i>Tgif2</i>                                       | -1,683843769 | 1,37e-05   |
| Bromodomain containing 8                                                                                                                        | <i>Brd8</i>                                        | -1,683517912 | 0,00584484 |
| Kinetochore-localized astrin/spag5 binding                                                                                                      | <i>Knstrn</i>                                      | -1,683395518 | 0,00035314 |
| Swi/snf related, matrix associated, actin dependent regulator of chromatin, subfamily a, member 5                                               | <i>Smarca5</i>                                     | -1,683238147 | 7,16e-05   |
| Keratin 75                                                                                                                                      | <i>Krt75</i>                                       | -1,682909865 | 0,00696523 |
| Ttk protein kinase                                                                                                                              | <i>Ttk</i>                                         | -1,681859084 | 9,83e-05   |
| Ligand of numb-protein x 1                                                                                                                      | <i>Ln timer</i>                                    | -1,68168708  | 0,00810839 |
| Thymidylate synthase                                                                                                                            | <i>Tyms</i>                                        | -1,681667313 | 0,00372104 |
| Sec63-like (s. Cerevisiae)                                                                                                                      | <i>Sec63</i>                                       | -1,681625826 | 3,84e-05   |
| Lim domain containing 2                                                                                                                         | <i>Limd2</i>                                       | -1,681329731 | 0,00041264 |
| Coiled-coil domain containing 6                                                                                                                 | <i>Ccdc6</i>                                       | -1,681291605 | 1,20e-05   |
| N-methylpurine-dna glycosylase                                                                                                                  | <i>Mpg</i>                                         | -1,68110162  | 9,57e-05   |
| Tubulin, beta 5 class i                                                                                                                         | <i>Tubb5</i>                                       | -1,679826992 | 1,62e-05   |
| Lanc (bacterial lantibiotic synthetase component c)-like 2                                                                                      | <i>Lanc12</i>                                      | -1,679817025 | 5,68e-05   |
| Replication factor c (activator 1) 4                                                                                                            | <i>Rfc4</i>                                        | -1,679339619 | 6,23e-05   |
| Zinc finger, cchc domain containing 8                                                                                                           | <i>Zcchc8</i>                                      | -1,678469032 | 7,41e-05   |
| Huntingtin                                                                                                                                      | <i>Htt</i>                                         | -1,67831506  | 7,47e-05   |
| Fgfr1 oncogene partner 2                                                                                                                        | <i>Fgfr1op2</i>                                    | -1,678283409 | 0,00034361 |
| Chromobox 6                                                                                                                                     | <i>Cbx6</i>                                        | -1,678007585 | 0,00010527 |
| Lsm8 homolog, u6 small nuclear rna associated (s. Cerevisiae)                                                                                   | <i>Lsm8</i>                                        | -1,67786037  | 8,27e-06   |
| Adaptor-related protein complex 3, delta 1 subunit                                                                                              | <i>Ap3d1</i>                                       | -1,677673087 | 7,91e-05   |
| Transcription factor dp 1                                                                                                                       | <i>Tfdp1</i>                                       | -1,677556747 | 0,00029936 |
| Ral guanine nucleotide dissociation stimulator                                                                                                  | <i>Ralgds</i>                                      | -1,67730998  | 4,66e-05   |
| Enolase-phosphatase 1                                                                                                                           | <i>Enoph1</i>                                      | -1,677086173 | 4,81e-05   |
| Tripartite motif-containing 16                                                                                                                  | <i>Trim16</i>                                      | -1,676588178 | 0,00169653 |
| Dynein light chain tctex-type 1a /// dynein light chain tctex-type 1b /// dynein light chain tctex-type 1c /// dynein light chain tctex-type 1f | <i>Dynlt1a /// dynlt1b /// dynlt1c /// dynlt1f</i> | -1,676088542 | 5,26e-05   |
| Elongation of very long chain fatty acids (fen1/elo2, sur4/elo3, yeast)-like 4                                                                  | <i>Elovl4</i>                                      | -1,675778737 | 0,0046079  |
| Forkhead box l1                                                                                                                                 | <i>Foxl1</i>                                       | -1,675776751 | 0,00041339 |
| Protein kinase c, alpha                                                                                                                         | <i>Prkca</i>                                       | -1,674570798 | 5,03e-05   |
| Sr-related ctd-associated factor 11                                                                                                             | <i>Scaf11</i>                                      | -1,674515852 | 0,00017977 |
| Anti-silencing function 1b histone chaperone                                                                                                    | <i>Asf1b</i>                                       | -1,674048268 | 1,95e-05   |
| Cell division cycle associated 4                                                                                                                | <i>Cdca4</i>                                       | -1,673559383 | 0,00062905 |
| Small nuclear ribonucleoprotein 48 (u11/u12)                                                                                                    | <i>Snrnp48</i>                                     | -1,672265845 | 0,00285222 |
| Homeobox d13                                                                                                                                    | <i>Hoxd13</i>                                      | -1,672186195 | 0,00014076 |
| Serine (or cysteine) peptidase inhibitor, clade b, member 6a                                                                                    | <i>Serpinb6a</i>                                   | -1,671737106 | 1,07e-05   |
| Star-related lipid transfer (start) domain containing 13                                                                                        | <i>Stard13</i>                                     | -1,671361252 | 4,62e-05   |
| Dead (asp-glu-ala-asp) box polypeptide 21                                                                                                       | <i>Ddx21</i>                                       | -1,670870613 | 3,00e-05   |

|                                                                                                                                                                       |                                                                                                     |              |            |
|-----------------------------------------------------------------------------------------------------------------------------------------------------------------------|-----------------------------------------------------------------------------------------------------|--------------|------------|
| Tetraspanin 8                                                                                                                                                         | <i>Tspan8</i>                                                                                       | -1,670404372 | 0,00097157 |
| Prp38 pre-mrna processing factor 38 (yeast) domain containing a                                                                                                       | <i>Prpf38a</i>                                                                                      | -1,670175706 | 0,00127296 |
| Chloride intracellular channel 1                                                                                                                                      | <i>Clic1</i>                                                                                        | -1,669979816 | 1,25e-05   |
| Hig1 domain family, member 1c /// methyltransferase like 7a1 /// methyltransferase like 7a2 /// mettl7a2-higd1c readthrough transcript /// methyltransferase like 7a3 | <i>Higd1c</i> /// <i>mettl7a1</i> /// <i>mettl7a2</i> /// <i>mettl7a2higd1c</i> /// <i>mettl7a3</i> | -1,669953612 | 0,00042666 |
| Glutaminyl-peptide cyclotransferase (glutaminyl cyclase)                                                                                                              | <i>Qpct</i>                                                                                         | -1,669182781 | 0,00039559 |
| Reticulon 3                                                                                                                                                           | <i>Rtn3</i>                                                                                         | -1,664186335 | 7,42e-05   |
| Polymerase (rna) ii (dna directed) polypeptide e                                                                                                                      | <i>Polr2e</i>                                                                                       | -1,663944834 | 1,39e-05   |
| Adp-ribosylation factor gtpase activating protein 1                                                                                                                   | <i>Arfgap1</i>                                                                                      | -1,663751711 | 0,00037813 |
| Riken cDNA 9030617o03 gene                                                                                                                                            | <i>9030617o03rik</i>                                                                                | -1,663331403 | 0,00016352 |
| Bicaudal d homolog 2 (drosophila)                                                                                                                                     | <i>Bicd2</i>                                                                                        | -1,662340509 | 1,62e-05   |
| Protein tyrosine phosphatase, receptor type, e                                                                                                                        | <i>Ptpre</i>                                                                                        | -1,662194155 | 0,00019646 |
| Protein o-fucosyltransferase 2                                                                                                                                        | <i>Pofut2</i>                                                                                       | -1,660765743 | 9,57e-05   |
| Aquaporin 3                                                                                                                                                           | <i>Aqp3</i>                                                                                         | -1,660612479 | 0,00057941 |
| Proteasome (prosome, macropain) 26S subunit, non-ATPase, 13                                                                                                           | <i>Psm13</i>                                                                                        | -1,660427804 | 2,04e-05   |
| Heterogeneous nuclear ribonucleoprotein 1                                                                                                                             | <i>HnRNPL</i>                                                                                       | -1,660113541 | 0,00120188 |
| Acylphosphatase 2, muscle type                                                                                                                                        | <i>Acyp2</i>                                                                                        | -1,65959485  | 0,00226221 |
| Pbx/knotted 1 homeobox                                                                                                                                                | <i>Pknox1</i>                                                                                       | -1,659489373 | 0,00020524 |
| Protein tyrosine phosphatase, non-receptor type 1                                                                                                                     | <i>Ptpn1</i>                                                                                        | -1,659483672 | 0,00010489 |
| Sry (sex determining region Y)-box 5                                                                                                                                  | <i>Sox5</i>                                                                                         | -1,659397109 | 0,00108919 |
| Polymerase (DNA directed), delta 2, regulatory subunit                                                                                                                | <i>Pold2</i>                                                                                        | -1,659359104 | 5,34e-05   |
| Tank-binding kinase 1                                                                                                                                                 | <i>Tbk1</i>                                                                                         | -1,659339971 | 0,00017489 |
| Suppressor of defective silencing 3 homolog (S. cerevisiae)                                                                                                           | <i>SudS3</i>                                                                                        | -1,659216793 | 2,93e-05   |
| Small nuclear ribonucleoprotein 40 (U5)                                                                                                                               | <i>SnRNP40</i>                                                                                      | -1,658918828 | 0,00153556 |
| Nik related kinase                                                                                                                                                    | <i>Nrk</i>                                                                                          | -1,65876597  | 0,00102121 |
| RNA binding motif protein, X chromosome                                                                                                                               | <i>Rbmx</i>                                                                                         | -1,657835103 | 3,77e-05   |
| Endothelin receptor type A                                                                                                                                            | <i>Ednra</i>                                                                                        | -1,657683204 | 0,00890309 |
| Helicase, lymphoid specific                                                                                                                                           | <i>Hells</i>                                                                                        | -1,657210026 | 0,00041328 |
| Aly/ref export factor /// aly/ref export factor 2                                                                                                                     | <i>Alyref</i> /// <i>alyref2</i>                                                                    | -1,656949257 | 0,00034511 |
| Tubulin, gamma complex associated protein 3                                                                                                                           | <i>TubGCP3</i>                                                                                      | -1,65679704  | 0,00084217 |
| Microrchidia 4                                                                                                                                                        | <i>Morc4</i>                                                                                        | -1,656537238 | 0,00018976 |
| Ubiquitin specific peptidase 18                                                                                                                                       | <i>Usp18</i>                                                                                        | -1,656082142 | 1,23e-05   |
| Lysophosphatidylcholine acyltransferase 3                                                                                                                             | <i>Lpcat3</i>                                                                                       | -1,655634714 | 2,19e-05   |
| Small nuclear ribonucleoprotein D3                                                                                                                                    | <i>SnRNPd3</i>                                                                                      | -1,655270614 | 0,00072129 |
| Urate oxidase                                                                                                                                                         | <i>Uox</i>                                                                                          | -1,655087976 | 0,00057399 |
| Centrosomal protein 95                                                                                                                                                | <i>Cep95</i>                                                                                        | -1,654990456 | 0,00059321 |
| Wd repeat and HMG-box DNA binding protein 1                                                                                                                           | <i>Wdhd1</i>                                                                                        | -1,654386007 | 0,00014314 |
| Phosphoglycerate mutase 1                                                                                                                                             | <i>Pgam1</i>                                                                                        | -1,653641636 | 2,59e-05   |
| Fanconi anemia, complementation group A                                                                                                                               | <i>FanCA</i>                                                                                        | -1,653615266 | 7,31e-05   |
| Tubulin, gamma complex associated protein 2                                                                                                                           | <i>TubGCP2</i>                                                                                      | -1,653319442 | 1,34e-05   |

|                                                                                                                                                                                                                                                                                                                                                          |                                                                                                                                                                           |              |            |
|----------------------------------------------------------------------------------------------------------------------------------------------------------------------------------------------------------------------------------------------------------------------------------------------------------------------------------------------------------|---------------------------------------------------------------------------------------------------------------------------------------------------------------------------|--------------|------------|
| Heterogeneous nuclear ribonucleoprotein a/b                                                                                                                                                                                                                                                                                                              | <i>Hnrnpab</i>                                                                                                                                                            | -1,653005032 | 0,00028861 |
| Monocyte to macrophage differentiation-associated                                                                                                                                                                                                                                                                                                        | <i>Mmd</i>                                                                                                                                                                | -1,652923821 | 9,29e-05   |
| Nuclear respiratory factor 1                                                                                                                                                                                                                                                                                                                             | <i>Nrf1</i>                                                                                                                                                               | -1,652395379 | 0,00057573 |
| Eva-1 homolog c (c. Elegans)                                                                                                                                                                                                                                                                                                                             | <i>Eva1c</i>                                                                                                                                                              | -1,652358433 | 0,00045729 |
| Cyclin-dependent kinase 4                                                                                                                                                                                                                                                                                                                                | <i>Cdk4</i>                                                                                                                                                               | -1,652276072 | 1,78e-05   |
| Paxip1 associated glutamate rich protein 1a                                                                                                                                                                                                                                                                                                              | <i>Pagr1a</i>                                                                                                                                                             | -1,652233891 | 0,00015053 |
| Ankyrin repeat domain 13a                                                                                                                                                                                                                                                                                                                                | <i>Ankrd13a</i>                                                                                                                                                           | -1,651073244 | 2,41e-05   |
| Guanine nucleotide binding protein (g protein), beta 1                                                                                                                                                                                                                                                                                                   | <i>Gnb1</i>                                                                                                                                                               | -1,650616047 | 0,00453426 |
| Zinc finger protein 36, c3h type-like 1                                                                                                                                                                                                                                                                                                                  | <i>Zfp36l1</i>                                                                                                                                                            | -1,650544288 | 8,22e-05   |
| Zinc finger protein 532                                                                                                                                                                                                                                                                                                                                  | <i>Zfp532</i>                                                                                                                                                             | -1,649895181 | 3,31e-05   |
| H2a histone family, member y3                                                                                                                                                                                                                                                                                                                            | <i>H2afy3</i>                                                                                                                                                             | -1,649814729 | 0,0096611  |
| Protein phosphatase 6, regulatory subunit 2                                                                                                                                                                                                                                                                                                              | <i>Ppp6r2</i>                                                                                                                                                             | -1,649636529 | 0,0033596  |
| Exonuclease 3'-5' domain containing 2                                                                                                                                                                                                                                                                                                                    | <i>Exd2</i>                                                                                                                                                               | -1,649245055 | 0,00015467 |
| Cytohesin 3                                                                                                                                                                                                                                                                                                                                              | <i>Cyth3</i>                                                                                                                                                              | -1,648627273 | 2,66e-05   |
| Mau2 chromatid cohesion factor homolog (c. Elegans)                                                                                                                                                                                                                                                                                                      | <i>Mau2</i>                                                                                                                                                               | -1,648492878 | 4,14e-05   |
| Ganglioside-induced differentiation-associated-protein 10                                                                                                                                                                                                                                                                                                | <i>Gdap10</i>                                                                                                                                                             | -1,64823117  | 0,00205521 |
| Centrosomal protein 55                                                                                                                                                                                                                                                                                                                                   | <i>Cep55</i>                                                                                                                                                              | -1,647872778 | 0,00418613 |
| Polymerase (dna-directed), delta 3, accessory subunit                                                                                                                                                                                                                                                                                                    | <i>Pold3</i>                                                                                                                                                              | -1,647391205 | 0,00057497 |
| Achaete-scute complex homolog 1 (drosophila)                                                                                                                                                                                                                                                                                                             | <i>Ascl1</i>                                                                                                                                                              | -1,647057189 | 0,00218432 |
| Proliferation-associated 2g4                                                                                                                                                                                                                                                                                                                             | <i>Pa2g4</i>                                                                                                                                                              | -1,646939669 | 2,15e-05   |
| Katanin p60 (atpase-containing) subunit a1                                                                                                                                                                                                                                                                                                               | <i>Katna1</i>                                                                                                                                                             | -1,646722468 | 1,27e-05   |
| Ubx domain protein 8                                                                                                                                                                                                                                                                                                                                     | <i>Ubxn8</i>                                                                                                                                                              | -1,645349127 | 0,00059098 |
| Werner syndrome homolog (human)                                                                                                                                                                                                                                                                                                                          | <i>Wrn</i>                                                                                                                                                                | -1,644235214 | 0,00101166 |
| Structural maintenance of chromosomes 3                                                                                                                                                                                                                                                                                                                  | <i>Smc3</i>                                                                                                                                                               | -1,643541244 | 3,66e-05   |
| Riken cdna 2810428i15 gene                                                                                                                                                                                                                                                                                                                               | <i>2810428i15rik</i>                                                                                                                                                      | -1,643330446 | 0,00021979 |
| Serine/arginine-rich splicing factor 7                                                                                                                                                                                                                                                                                                                   | <i>Srsf7</i>                                                                                                                                                              | -1,64259895  | 0,00018262 |
| Ras-related c3 botulinum substrate 1                                                                                                                                                                                                                                                                                                                     | <i>Rac1</i>                                                                                                                                                               | -1,642531107 | 6,29e-05   |
| Mckusick-kaufman syndrome                                                                                                                                                                                                                                                                                                                                | <i>Mkks</i>                                                                                                                                                               | -1,642476782 | 7,06e-05   |
| Haus augmin-like complex, subunit 5                                                                                                                                                                                                                                                                                                                      | <i>Haus5</i>                                                                                                                                                              | -1,641895054 | 0,00029141 |
| Meis homeobox 1                                                                                                                                                                                                                                                                                                                                          | <i>Meis1</i>                                                                                                                                                              | -1,641266505 | 0,00016835 |
| Gasdermin c /// gasdermin c2                                                                                                                                                                                                                                                                                                                             | <i>Gsdmc /// gsdmc2</i>                                                                                                                                                   | -1,639621626 | 0,00325642 |
| Tpx2, microtubule-associated protein homolog (xenopus laevis)                                                                                                                                                                                                                                                                                            | <i>Tpx2</i>                                                                                                                                                               | -1,639435917 | 2,07e-05   |
| Isoprenylcysteine carboxyl methyltransferase                                                                                                                                                                                                                                                                                                             | <i>Icmt</i>                                                                                                                                                               | -1,639150619 | 3,76e-05   |
| Histone cluster 1, h4a /// histone cluster 1, h4b /// histone cluster 1, h4c /// histone cluster 1, h4d /// histone cluster 1, h4f /// histone cluster 1, h4h /// histone cluster 1, h4i /// histone cluster 1, h4j /// histone cluster 1, h4k /// histone cluster 1, h4m /// histone cluster 1, h4n /// histone cluster 2, h4 /// histone cluster 4, h4 | <i>Hist1h4a /// hist1h4b /// hist1h4c /// hist1h4d /// hist1h4f /// hist1h4h /// hist1h4i /// hist1h4j /// hist1h4k /// hist1h4m /// hist1h4n /// hist2h4 /// hist4h4</i> | -1,6391447   | 0,00890836 |
| Elk3, member of ets oncogene family                                                                                                                                                                                                                                                                                                                      | <i>Elk3</i>                                                                                                                                                               | -1,63906684  | 8,74e-05   |
| Coiled-coil domain containing 77                                                                                                                                                                                                                                                                                                                         | <i>Ccdc77</i>                                                                                                                                                             | -1,639020684 | 0,0030973  |

|                                                                |                         |              |            |
|----------------------------------------------------------------|-------------------------|--------------|------------|
| Serine/arginine-rich splicing factor 1-like ///                | <i>Loc102641923 ///</i> | -1,638797793 | 0,00016488 |
| serine/arginine-rich splicing factor 1                         | <i>srsf1</i>            |              |            |
| Nucleoporin 133                                                | <i>Nup133</i>           | -1,638003263 | 3,02e-05   |
| Transmembrane protein 223                                      | <i>Tmem223</i>          | -1,637308295 | 8,33e-05   |
| Neoplastic progression 2                                       | <i>Npn2</i>             | -1,637161726 | 0,00035798 |
| Sec14-like 1 (s. Cerevisiae)                                   | <i>Sec14l1</i>          | -1,635968664 | 0,00012225 |
| Mediator complex subunit 16                                    | <i>Med16</i>            | -1,634877433 | 0,00010803 |
| N-deacetylase/n-sulfotransferase (heparan glucosaminyl) 1      | <i>Ndst1</i>            | -1,63473408  | 0,00012469 |
| Phosphoglucomutase 1                                           | <i>Pgm1</i>             | -1,634720478 | 5,03e-05   |
| Actin related protein 2/3 complex, subunit 3                   | <i>Arpc3</i>            | -1,63463819  | 8,73e-05   |
| Luc7-like 2 (s. Cerevisiae)                                    | <i>Luc7l2</i>           | -1,634511992 | 8,95e-05   |
| Ubiquitin-conjugating enzyme e2s                               | <i>Ube2s</i>            | -1,634244096 | 2,01e-05   |
| Kinesin light chain 1                                          | <i>Klc1</i>             | -1,633658061 | 8,78e-05   |
| Breast cancer metastasis-suppressor 1                          | <i>Brms1</i>            | -1,633620831 | 0,00020804 |
| Carnitine palmitoyltransferase 1a, liver                       | <i>Cpt1a</i>            | -1,633351673 | 0,00151788 |
| Otu domain containing 7b                                       | <i>Otud7b</i>           | -1,63257531  | 0,00069535 |
| Phosphatidylinositol 4-kinase type 2 alpha                     | <i>Pi4k2a</i>           | -1,632196121 | 5,40e-05   |
| Unconventional snare in the er 1 homolog (s. Cerevisiae)       | <i>Use1</i>             | -1,631986015 | 2,46e-05   |
| Keratin 10                                                     | <i>Krt10</i>            | -1,631813828 | 0,00048046 |
| Multiple endocrine neoplasia 1                                 | <i>Men1</i>             | -1,631566986 | 0,00019715 |
| Homeobox c13                                                   | <i>Hoxc13</i>           | -1,63141069  | 0,0001344  |
| Nipa-like domain containing 2                                  | <i>Nipal2</i>           | -1,631408106 | 0,00180599 |
| Ring finger protein 157                                        | <i>Rnf157</i>           | -1,630168648 | 0,00077506 |
| Serine/arginine repetitive matrix 1                            | <i>Srrm1</i>            | -1,630131832 | 0,00017289 |
| Microtubule-associated protein, rp/eb family, member 2         | <i>Mapre2</i>           | -1,629998388 | 4,58e-05   |
| Tubulin, beta 4b class ivb                                     | <i>Tubb4b</i>           | -1,629847387 | 1,67e-05   |
| Poc5 centriolar protein homolog (chlamydomonas)                | <i>Poc5</i>             | -1,629346761 | 0,00019946 |
| Endoplasmic reticulum-golgi intermediate compartment (ergic) 1 | <i>Ergic1</i>           | -1,628733694 | 0,00980852 |
| Regulator of g-protein signaling 2                             | <i>Rgs2</i>             | -1,628469025 | 0,00016471 |
| Pou domain, class 6, transcription factor 1                    | <i>Pou6f1</i>           | -1,628195303 | 5,94e-05   |
| Zinc finger protein 521                                        | <i>Zfp521</i>           | -1,627985037 | 0,00156806 |
| Dead (asp-glu-ala-asp) box polypeptide 49                      | <i>Ddx49</i>            | -1,627622654 | 0,00061751 |
| F-box protein 31                                               | <i>Fbxo31</i>           | -1,627242621 | 0,0005919  |
| Arp10 actin-related protein 10                                 | <i>Actr10</i>           | -1,627076478 | 7,33e-05   |
| Ww domain binding protein 1                                    | <i>Wbp1</i>             | -1,62541383  | 5,86e-05   |
| Nuclear factor i/x                                             | <i>Nfix</i>             | -1,624960899 | 0,00012094 |
| Interleukin 34                                                 | <i>Il34</i>             | -1,624634926 | 0,00011131 |
| Start domain containing 8                                      | <i>Stard8</i>           | -1,624230699 | 0,00013131 |
| Iroquois related homeobox 2 (drosophila)                       | <i>Irx2</i>             | -1,623864507 | 6,39e-05   |
| Wd repeat domain 90                                            | <i>Wdr90</i>            | -1,623005237 | 0,00011441 |
| Interferon zeta                                                | <i>Ifnz</i>             | -1,622271946 | 0,00411228 |
| Pecanex homolog (drosophila)                                   | <i>Pcnx</i>             | -1,621869933 | 0,00038509 |

|                                                                                                                                                                 |                             |              |            |
|-----------------------------------------------------------------------------------------------------------------------------------------------------------------|-----------------------------|--------------|------------|
| Asparagine-linked glycosylation 12 (alpha-1,6-mannosyltransferase)                                                                                              | <i>Alg12</i>                | -1,621001795 | 0,00020201 |
| Killer cell lectin-like receptor, subfamily a, member 18                                                                                                        | <i>Klra18</i>               | -1,620800227 | 0,00150987 |
| Scribbled homolog (drosophila)                                                                                                                                  | <i>Scrib</i>                | -1,619845575 | 0,00106286 |
| Riken cdna 2610528a11 gene                                                                                                                                      | <i>2610528a11rik</i>        | -1,619556179 | 0,0026901  |
| Testis expressed gene 261                                                                                                                                       | <i>Tex261</i>               | -1,619188434 | 0,00010445 |
| Glial cell line derived neurotrophic factor family receptor alpha 2                                                                                             | <i>Gfra2</i>                | -1,618476381 | 0,00168846 |
| Dep domain containing 7                                                                                                                                         | <i>Depdc7</i>               | -1,618432535 | 3,53e-05   |
| Erythrocyte protein band 4.1-like 1                                                                                                                             | <i>Epb4.1l1</i>             | -1,618406796 | 0,00034231 |
| Squamous cell carcinoma antigen recognized by t cells 3                                                                                                         | <i>Sart3</i>                | -1,618324258 | 0,00032569 |
| Adaptor-related protein complex ap-1, mu subunit 1                                                                                                              | <i>Ap1m1</i>                | -1,618116662 | 3,65e-05   |
| Lectin, mannose-binding, 1                                                                                                                                      | <i>Lman1</i>                | -1,618042277 | 0,00039141 |
| Fc receptor, igg, low affinity iib                                                                                                                              | <i>Fcgr2b</i>               | -1,61709026  | 0,00637139 |
| Family with sequence similarity 120, member a                                                                                                                   | <i>Fam120a</i>              | -1,61612649  | 0,00304786 |
| Insulin-like growth factor 2 mrna binding protein 1                                                                                                             | <i>Igf2bp1</i>              | -1,61498605  | 0,00052978 |
| Family with sequence similarity 114, member a1                                                                                                                  | <i>Fam114a1</i>             | -1,614149585 | 3,46e-05   |
| Solute carrier family 4 (anion exchanger), member 8                                                                                                             | <i>Slc4a8</i>               | -1,614003547 | 0,00056935 |
| Sar1 gene homolog a (s. Cerevisiae)                                                                                                                             | <i>Sar1a</i>                | -1,613452738 | 2,07e-05   |
| Riken cdna 0610037113 gene                                                                                                                                      | <i>0610037113rik</i>        | -1,61254309  | 0,00015788 |
| Actin related protein 2/3 complex, subunit 1b /// predicted pseudogene 5637                                                                                     | <i>Arpc1b /// gm5637</i>    | -1,612272048 | 2,41e-05   |
| Protein tyrosine phosphatase 4a3                                                                                                                                | <i>Ptp4a3</i>               | -1,612214364 | 0,00122812 |
| Proteasome (prosome, macropain) 26s subunit, non-atpase, 3                                                                                                      | <i>Psmc3</i>                | -1,611628503 | 0,0001136  |
| Diacylglycerol lipase, beta                                                                                                                                     | <i>Daglb</i>                | -1,610331475 | 0,000232   |
| Neural precursor cell expressed, developmentally down-regulated gene 4-like                                                                                     | <i>Nedd4l</i>               | -1,609792412 | 1,47e-05   |
| Lamin a                                                                                                                                                         | <i>Lmna</i>                 | -1,609643191 | 0,00013496 |
| Mitogen-activated protein kinase 8 interacting protein 2                                                                                                        | <i>Mapk8ip2</i>             | -1,609593429 | 0,00248499 |
| Sodium channel, voltage-gated, type i, beta                                                                                                                     | <i>Scn1b</i>                | -1,608612039 | 0,0010645  |
| Proteolipid protein 2                                                                                                                                           | <i>Plp2</i>                 | -1,608344577 | 1,29e-05   |
| Spectrin beta, non-erythrocytic 1                                                                                                                               | <i>Sptbn1</i>               | -1,608243073 | 0,00091147 |
| Wd repeat and socs box-containing 2                                                                                                                             | <i>Wsb2</i>                 | -1,607041663 | 0,00012781 |
| Mus musculus adult male lung cdna, riken full-length enriched library, clone:1200016e24 product:unclassifiable, full insert sequence. /// predicted gene, 20186 | <i>Bc057675 /// gm20186</i> | -1,605153283 | 0,00256616 |
| Nuclear transcription factor-y beta                                                                                                                             | <i>Nfya</i>                 | -1,603935479 | 4,06e-05   |
| Guanine nucleotide binding protein (g protein), beta 3                                                                                                          | <i>Gnb3</i>                 | -1,603095813 | 0,00887623 |
| Dual specificity phosphatase 22                                                                                                                                 | <i>Dusp22</i>               | -1,601345528 | 0,00024206 |
| Neuronal pentraxin chromo domain /// neuronal pentraxin receptor                                                                                                | <i>Npcd /// nptxr</i>       | -1,600364404 | 0,0011829  |
| Protein o-fucosyltransferase 1                                                                                                                                  | <i>Pofut1</i>               | -1,600229621 | 0,000548   |
| Eukaryotic translation initiation factor 4e binding protein 2                                                                                                   | <i>Eif4ebp2</i>             | -1,600139312 | 0,00010178 |

|                                                                                       |                            |              |            |
|---------------------------------------------------------------------------------------|----------------------------|--------------|------------|
| Scavenger receptor class b, member 1                                                  | <i>Scarb1</i>              | -1,600050517 | 0,00165304 |
| Galactose mutarotase                                                                  | <i>Galm</i>                | -1,59968776  | 0,00092911 |
| Adp-ribosylation factor-like 4d                                                       | <i>Arl4d</i>               | -1,599624828 | 0,000181   |
| Peroxiredoxin 2                                                                       | <i>Prdx2</i>               | -1,599101343 | 3,97e-05   |
| Splicing factor 1                                                                     | <i>Sf1</i>                 | -1,598776973 | 0,00141935 |
| Gene trap rosa 26, philippe soriano                                                   | <i>Gt(rosa)26sor</i>       | -1,598680222 | 0,00044944 |
| F-box and wd-40 domain protein 4                                                      | <i>Fbxw4</i>               | -1,598592803 | 0,00043658 |
| Centrobin, centrosomal brca2 interacting protein                                      | <i>Cntrob</i>              | -1,598574539 | 1,53e-05   |
| Oligosaccharyltransferase 4 homolog (s. Cerevisiae)                                   | <i>Ost4</i>                | -1,598423794 | 0,00022445 |
| Guanine nucleotide binding protein (g protein), beta 2                                | <i>Gnb2</i>                | -1,598320573 | 8,73e-05   |
| Kelch-like 5                                                                          | <i>Klhl5</i>               | -1,598164391 | 5,04e-05   |
| Vacuolar protein sorting 36 (yeast)                                                   | <i>Vps36</i>               | -1,597554282 | 4,77e-05   |
| Eukaryotic translation initiation factor 4 gamma, 3                                   | <i>Eif4g3</i>              | -1,597183925 | 0,00017598 |
| Membrane bound o-acyltransferase domain containing 1                                  | <i>Mboat1</i>              | -1,597152192 | 3,09e-05   |
| Tripartite motif-containing 28                                                        | <i>Trim28</i>              | -1,596672044 | 0,00025035 |
| Ring finger protein 121                                                               | <i>Rnf121</i>              | -1,596563309 | 0,00051401 |
| Maternally expressed 3                                                                | <i>Meg3</i>                | -1,595827121 | 6,10e-05   |
| Protein arginine n-methyltransferase 3                                                | <i>Prmt3</i>               | -1,59543219  | 0,00310336 |
| Transcription factor 20                                                               | <i>Tcf20</i>               | -1,59537041  | 0,00019791 |
| Mms19 (met18 s. Cerevisiae)                                                           | <i>Mms19</i>               | -1,595115699 | 8,73e-05   |
| Fibroblast growth factor 14                                                           | <i>Fgf14</i>               | -1,594490582 | 0,00059583 |
| Zinc finger, fyve domain containing 21                                                | <i>Zfyve21</i>             | -1,593845724 | 0,0014548  |
| Interferon-induced protein with tetratricopeptide repeats 3                           | <i>Ifit3</i>               | -1,593613436 | 0,00019479 |
| Dna segment, chr 10, johns hopkins university 81 expressed                            | <i>D10jhu81e</i>           | -1,593001753 | 3,97e-05   |
| Scm-like with four mbt domains 2                                                      | <i>Sfmbt2</i>              | -1,592714299 | 0,00291176 |
| Zinc finger protein 821                                                               | <i>Zfp821</i>              | -1,59190824  | 0,00035951 |
| Pyruvate dehydrogenase kinase, isoenzyme 3                                            | <i>Pdk3</i>                | -1,591112317 | 0,00028347 |
| Cyclin i                                                                              | <i>Ccni</i>                | -1,591026277 | 0,00024481 |
| Zinc finger, cchc domain containing 17                                                | <i>Zcchc17</i>             | -1,590635187 | 4,61e-05   |
| Btb (poz) domain containing 2                                                         | <i>Btbd2</i>               | -1,58990562  | 0,00043995 |
| Integrin beta 1 binding protein 1                                                     | <i>Itgb1bp1</i>            | -1,589671327 | 8,47e-05   |
| Purkinje cell protein 2 (l7)                                                          | <i>Pcp2</i>                | -1,58944056  | 0,0039072  |
| Excision repair cross-complementing rodent repair deficiency, complementation group 1 | <i>Ercc1</i>               | -1,589302999 | 8,92e-05   |
| Sterol o-acyltransferase 1                                                            | <i>Soat1</i>               | -1,588732977 | 9,06e-05   |
| Polymerase (dna-directed), epsilon 4 (p12 subunit)                                    | <i>Pole4</i>               | -1,588093958 | 0,00162615 |
| Pyridoxine 5'-phosphate oxidase                                                       | <i>Pnpo</i>                | -1,58647305  | 0,00019677 |
| High mobility group at-hook 1 /// high mobility group at-hook i, related sequence 1   | <i>Hmga1 /// hmga1-rs1</i> | -1,586224935 | 0,0070555  |
| Hippocalcin-like 1                                                                    | <i>Hpcal1</i>              | -1,585760765 | 4,77e-05   |
| Low density lipoprotein receptor-related protein 1                                    | <i>Lrp1</i>                | -1,585049273 | 0,00017572 |
| Transmembrane protein 263                                                             | <i>Tmem263</i>             | -1,585026976 | 0,00783544 |



|                                                                           |                          |              |            |
|---------------------------------------------------------------------------|--------------------------|--------------|------------|
| Solute carrier family 6 (neurotransmitter transporter, taurine), member 6 | <i>Slc6a6</i>            | -1,583921598 | 0,0036124  |
| Ebna1 binding protein 2                                                   | <i>Ebna1bp2</i>          | -1,583616124 | 6,33e-05   |
| Caveolin 2                                                                | <i>Cav2</i>              | -1,58257517  | 0,00010158 |
| Tubulin, alpha 1c pseudogene /// tubulin, alpha 1a                        | <i>Gm6682 /// tuba1a</i> | -1,582415634 | 0,00525869 |
| Cysteine and histidine rich 1                                             | <i>Cyhr1</i>             | -1,582398756 | 0,00105896 |
| Microtubule-associated protein 1b                                         | <i>Map1b</i>             | -1,582190332 | 0,00933079 |
| Plasmacytoma variant translocation 1                                      | <i>Pvt1</i>              | -1,581878987 | 3,46e-05   |
| Platelet-activating factor acetylhydrolase, isoform 1b, subunit 1         | <i>Pafah1b1</i>          | -1,581279793 | 6,42e-05   |
| Histone deacetylase 7                                                     | <i>Hdac7</i>             | -1,58105694  | 0,00047849 |
| Cd164 antigen                                                             | <i>Cd164</i>             | -1,580814209 | 0,00023079 |
| Sh3 domain binding glutamic acid-rich protein-like 3                      | <i>Sh3bgrl3</i>          | -1,580635245 | 8,09e-05   |
| Lim and senescent cell antigen-like domains 1                             | <i>Lims1</i>             | -1,58053923  | 0,0004978  |
| Cd1d2 antigen                                                             | <i>Cd1d2</i>             | -1,580384146 | 0,00027449 |
| Nuf2, ndc80 kinetochore complex component, homolog (s. Cerevisiae)        | <i>Nuf2</i>              | -1,580298752 | 0,00029896 |
| Proline rich 14                                                           | <i>Prr14</i>             | -1,579327804 | 0,00013448 |
| Apelin                                                                    | <i>Apln</i>              | -1,579080808 | 0,00092309 |
| Proteasome (prosome, macropain) 26s subunit, non-atpase, 9                | <i>Psmc9</i>             | -1,578837374 | 0,0035346  |
| Discs, large (drosophila) homolog-associated protein 5                    | <i>Dlgap5</i>            | -1,576843685 | 0,00068416 |
| G protein-coupled receptor kinase-interactor 2                            | <i>Git2</i>              | -1,576280218 | 0,00061846 |
| Erythrocyte protein band 4.2                                              | <i>Epb4.2</i>            | -1,576039081 | 0,00474866 |
| Proline-rich nuclear receptor coactivator 2                               | <i>Pnrc2</i>             | -1,575458478 | 0,00111184 |
| Predicted gene 2382 /// 5, 10-methenyltetrahydrofolate synthetase         | <i>Gm2382 /// mthfs</i>  | -1,575420309 | 0,00017598 |
| Rab10, member ras oncogene family                                         | <i>Rab10</i>             | -1,57530242  | 0,00446001 |
| Ankyrin repeat domain 32                                                  | <i>Ankrd32</i>           | -1,574806199 | 0,00576831 |
| Riken cDNA 4930427a07 gene                                                | <i>4930427a07rik</i>     | -1,573676054 | 0,00032611 |
| Prostaglandin e receptor 2 (subtype ep2)                                  | <i>Ptger2</i>            | -1,573658501 | 0,00019676 |
| Cyclin-dependent kinase 16                                                | <i>Cdk16</i>             | -1,573467787 | 0,00018189 |
| Cd22 antigen                                                              | <i>Cd22</i>              | -1,573294487 | 0,00509182 |
| Haus augmin-like complex, subunit 3                                       | <i>Haus3</i>             | -1,572803586 | 4,51e-05   |
| Crm, cramped-like (drosophila)                                            | <i>Cramp11</i>           | -1,572701275 | 0,00522226 |
| Proteasome (prosome, macropain) inhibitor subunit 1                       | <i>Psmf1</i>             | -1,572623405 | 4,81e-05   |
| Solute carrier family 19 (thiamine transporter), member 2                 | <i>Slc19a2</i>           | -1,572161611 | 0,00013272 |
| Taf12 rna polymerase ii, tata box binding protein (tbp)-associated factor | <i>Taf12</i>             | -1,572038813 | 4,60e-05   |
| Grainyhead-like 2 (drosophila)                                            | <i>Grhl2</i>             | -1,571930829 | 0,00381789 |
| Na <sup>+</sup> /K <sup>+</sup> transporting atpase interacting 1         | <i>Nkain1</i>            | -1,571520893 | 5,80e-05   |
| Utrophin                                                                  | <i>Utrn</i>              | -1,571191554 | 1,85e-05   |
| Leprecan-like 4                                                           | <i>Leprel4</i>           | -1,570878405 | 0,00015449 |
| Sphingosine kinase 2                                                      | <i>Sphk2</i>             | -1,570728652 | 0,00555912 |
| F-box and wd-40 domain protein 8                                          | <i>Fbxw8</i>             | -1,56995351  | 0,00093258 |

|                                                                                                                                                                                                                                                                                                                                   |                                                                                                                                                                  |              |            |
|-----------------------------------------------------------------------------------------------------------------------------------------------------------------------------------------------------------------------------------------------------------------------------------------------------------------------------------|------------------------------------------------------------------------------------------------------------------------------------------------------------------|--------------|------------|
| Nol1/nop2/sun domain family, member 5                                                                                                                                                                                                                                                                                             | <i>Nsun5</i>                                                                                                                                                     | -1,569951603 | 0,0004341  |
| Nucleoporin 43                                                                                                                                                                                                                                                                                                                    | <i>Nup43</i>                                                                                                                                                     | -1,56990958  | 6,79e-05   |
| Fk506 binding protein 11                                                                                                                                                                                                                                                                                                          | <i>Fkbp11</i>                                                                                                                                                    | -1,568732852 | 0,0010764  |
| Replication factor c (activator 1) 1                                                                                                                                                                                                                                                                                              | <i>Rfc1</i>                                                                                                                                                      | -1,568415504 | 0,00012549 |
| Anaphase-promoting complex subunit 5                                                                                                                                                                                                                                                                                              | <i>Anapc5</i>                                                                                                                                                    | -1,568336706 | 0,00012286 |
| Thyrotroph embryonic factor                                                                                                                                                                                                                                                                                                       | <i>Tef</i>                                                                                                                                                       | -1,567785631 | 0,00023477 |
| Msh homeobox 3                                                                                                                                                                                                                                                                                                                    | <i>Msx3</i>                                                                                                                                                      | -1,567533657 | 0,00014853 |
| Glutathione s-transferase, mu 1                                                                                                                                                                                                                                                                                                   | <i>Gstm1</i>                                                                                                                                                     | -1,567162846 | 0,00225548 |
| Serine/arginine repetitive matrix 3                                                                                                                                                                                                                                                                                               | <i>Srrm3</i>                                                                                                                                                     | -1,567051458 | 7,70e-05   |
| Hyaluronan synthase 3                                                                                                                                                                                                                                                                                                             | <i>Has3</i>                                                                                                                                                      | -1,566943124 | 0,0082979  |
| Sarcoglycan, delta (dystrophin-associated glycoprotein)                                                                                                                                                                                                                                                                           | <i>Sgcd</i>                                                                                                                                                      | -1,566782688 | 0,00036064 |
| Tax1 (human t cell leukemia virus type i) binding protein 1                                                                                                                                                                                                                                                                       | <i>Tax1bp1</i>                                                                                                                                                   | -1,566488899 | 0,00067977 |
| Paired box 9                                                                                                                                                                                                                                                                                                                      | <i>Pax9</i>                                                                                                                                                      | -1,56636794  | 0,00040671 |
| Zinc finger (ccch type), rna binding motif and serine/arginine rich 1                                                                                                                                                                                                                                                             | <i>Zrsr1</i>                                                                                                                                                     | -1,566151199 | 4,57e-05   |
| Bcl2-associated agonist of cell death                                                                                                                                                                                                                                                                                             | <i>Bad</i>                                                                                                                                                       | -1,565967169 | 0,00020398 |
| Mms22-like, dna repair protein                                                                                                                                                                                                                                                                                                    | <i>Mms22l</i>                                                                                                                                                    | -1,565456766 | 7,54e-05   |
| Dna fragmentation factor, alpha subunit                                                                                                                                                                                                                                                                                           | <i>Dffa</i>                                                                                                                                                      | -1,565324814 | 0,0010984  |
| Immediate early response 3                                                                                                                                                                                                                                                                                                        | <i>Ier3</i>                                                                                                                                                      | -1,565289352 | 6,46e-05   |
| Suppressor of cytokine signaling 5                                                                                                                                                                                                                                                                                                | <i>Socs5</i>                                                                                                                                                     | -1,5651187   | 0,00073086 |
| Elastin microfibril interfacer 1                                                                                                                                                                                                                                                                                                  | <i>Emilin1</i>                                                                                                                                                   | -1,564988468 | 0,00322324 |
| Receptor (calcitonin) activity modifying protein 3                                                                                                                                                                                                                                                                                | <i>Ramp3</i>                                                                                                                                                     | -1,564444186 | 0,00063935 |
| Caspase 6                                                                                                                                                                                                                                                                                                                         | <i>Casp6</i>                                                                                                                                                     | -1,563824536 | 0,00016331 |
| Histone cluster 1, h3a /// histone cluster 1, h3b /// histone cluster 1, h3c /// histone cluster 1, h3d /// histone cluster 1, h3e /// histone cluster 1, h3f /// histone cluster 1, h3g /// histone cluster 1, h3h /// histone cluster 1, h3i /// histone cluster 2, h3b /// histone cluster 2, h3c1 /// histone cluster 2, h3c2 | <i>Hist1h3a /// hist1h3b /// hist1h3c /// hist1h3d /// hist1h3e /// hist1h3f /// hist1h3g /// hist1h3h /// hist1h3i /// hist2h3b /// hist2h3c1 /// hist2h3c2</i> | -1,562940231 | 0,00120379 |
| Lsm14 homolog b (scd6, s. Cerevisiae)                                                                                                                                                                                                                                                                                             | <i>Lsm14b</i>                                                                                                                                                    | -1,562645288 | 8,49e-05   |
| Nima (never in mitosis gene a)-related expressed kinase 8                                                                                                                                                                                                                                                                         | <i>Nek8</i>                                                                                                                                                      | -1,562475948 | 0,00015885 |
| Gtpase activating protein (sh3 domain) binding protein 2                                                                                                                                                                                                                                                                          | <i>G3bp2</i>                                                                                                                                                     | -1,561967527 | 0,00080865 |
| Interferon-related developmental regulator 1                                                                                                                                                                                                                                                                                      | <i>Ifrd1</i>                                                                                                                                                     | -1,561936872 | 0,00014812 |
| Uev and lactate/malate dehydrogenase domains                                                                                                                                                                                                                                                                                      | <i>Uevld</i>                                                                                                                                                     | -1,561580349 | 0,00048463 |
| M-phase phosphoprotein 9                                                                                                                                                                                                                                                                                                          | <i>Mphosph9</i>                                                                                                                                                  | -1,561460816 | 0,00022515 |
| Yip1 interacting factor homolog a (s. Cerevisiae)                                                                                                                                                                                                                                                                                 | <i>Yif1a</i>                                                                                                                                                     | -1,561428707 | 0,00028029 |
| Ewing tumor-associated antigen 1                                                                                                                                                                                                                                                                                                  | <i>Etaa1</i>                                                                                                                                                     | -1,561368771 | 0,00052462 |
| Atpase, h+ transporting, lysosomal v1 subunit d                                                                                                                                                                                                                                                                                   | <i>Atp6v1d</i>                                                                                                                                                   | -1,560991087 | 0,00011227 |
| Leucine-rich repeats and wd repeat domain containing 1                                                                                                                                                                                                                                                                            | <i>Lrwd1</i>                                                                                                                                                     | -1,560111421 | 0,00070692 |
| Adrenergic receptor, alpha 1a                                                                                                                                                                                                                                                                                                     | <i>Adra1a</i>                                                                                                                                                    | -1,560110862 | 0,00053596 |
| Interleukin 6 receptor, alpha                                                                                                                                                                                                                                                                                                     | <i>Il6ra</i>                                                                                                                                                     | -1,559974628 | 0,00154818 |
| Aprataxin and pnkp like factor                                                                                                                                                                                                                                                                                                    | <i>Aplf</i>                                                                                                                                                      | -1,559932194 | 0,00086591 |

|                                                                                                                                                                            |                                                                                 |              |            |
|----------------------------------------------------------------------------------------------------------------------------------------------------------------------------|---------------------------------------------------------------------------------|--------------|------------|
| Receptor accessory protein 3                                                                                                                                               | <i>Reep3</i>                                                                    | -1,559546606 | 0,00021656 |
| Extracellular matrix protein 1                                                                                                                                             | <i>Ecm1</i>                                                                     | -1,559369614 | 0,00069399 |
| Sine oculis-related homeobox 5                                                                                                                                             | <i>Six5</i>                                                                     | -1,55882083  | 4,03e-05   |
| Enhancer of rudimentary homolog (drosophila) ///<br>enhancer of rudimentary homolog                                                                                        | <i>Erh</i> /// <i>loc101056061</i>                                              | -1,558183491 | 8,61e-05   |
| Hect domain and ankyrin repeat containing, e3<br>ubiquitin protein ligase 1                                                                                                | <i>Hace1</i>                                                                    | -1,558022893 | 0,00281414 |
| Denticleless homolog (drosophila)                                                                                                                                          | <i>Dtl</i>                                                                      | -1,557892625 | 0,00839634 |
| Lymphocyte antigen 6 complex, locus f                                                                                                                                      | <i>Ly6f</i>                                                                     | -1,557419359 | 0,00274639 |
| Ring finger protein 144b                                                                                                                                                   | <i>Rnf144b</i>                                                                  | -1,557099136 | 4,11e-05   |
| Aspartoacylase                                                                                                                                                             | <i>Aspa</i>                                                                     | -1,556855672 | 0,00018424 |
| Retinol binding protein 1, cellular                                                                                                                                        | <i>Rbp1</i>                                                                     | -1,556560831 | 0,00261031 |
| Inner membrane protein, mitochondrial                                                                                                                                      | <i>Immt</i>                                                                     | -1,556129983 | 0,00044084 |
| Suppressor of variegation 3-9 homolog 1<br>(drosophila)                                                                                                                    | <i>Suv39h1</i>                                                                  | -1,555988568 | 1,95e-05   |
| Two pore channel 1                                                                                                                                                         | <i>Tpcn1</i>                                                                    | -1,555614111 | 0,00011767 |
| Mitochondrial ribosomal protein l49                                                                                                                                        | <i>Mrpl49</i>                                                                   | -1,554858432 | 0,00033027 |
| Tbc1 domain family, member 15                                                                                                                                              | <i>Tbc1d15</i>                                                                  | -1,554715308 | 0,00270542 |
| Pdz binding kinase                                                                                                                                                         | <i>Pbk</i>                                                                      | -1,554216019 | 0,00016263 |
| Centromere protein e                                                                                                                                                       | <i>Cenpe</i>                                                                    | -1,554092409 | 0,00024481 |
| Polo-like kinase 4                                                                                                                                                         | <i>Plk4</i>                                                                     | -1,553734045 | 0,00049185 |
| Mitogen-activated protein kinase kinase kinase 6                                                                                                                           | <i>Map3k6</i>                                                                   | -1,55330713  | 0,00037387 |
| Podoplanin                                                                                                                                                                 | <i>Pdpm</i>                                                                     | -1,553299918 | 9,38e-05   |
| Anaphase promoting complex c subunit 15                                                                                                                                    | <i>Anapc15</i>                                                                  | -1,552842325 | 9,69e-05   |
| Predicted gene, 21596 /// predicted gene 6115 /// high<br>mobility group box 1 /// high mobility group protein<br>b1-like                                                  | <i>Gm21596</i> /// <i>gm6115</i><br>/// <i>hmgb1</i> ///<br><i>loc102635075</i> | -1,552374366 | 0,00266535 |
| Translocase of outer mitochondrial membrane 7<br>homolog (yeast)                                                                                                           | <i>Tomm7</i>                                                                    | -1,552151058 | 0,00459564 |
| Riken cDNA 1700020i14 gene                                                                                                                                                 | <i>1700020i14rik</i>                                                            | -1,551463864 | 0,00060816 |
| Mitochondrial ribosomal protein l42                                                                                                                                        | <i>Mrpl42</i>                                                                   | -1,551116079 | 7,45e-05   |
| Thioredoxin 1                                                                                                                                                              | <i>Txn1</i>                                                                     | -1,550867791 | 0,0082284  |
| Exonuclease 1                                                                                                                                                              | <i>Exo1</i>                                                                     | -1,550663262 | 0,00022947 |
| Sorting nexin 3                                                                                                                                                            | <i>Snx3</i>                                                                     | -1,550660996 | 4,95e-05   |
| Notch 1                                                                                                                                                                    | <i>Notch1</i>                                                                   | -1,549505976 | 0,00037494 |
| Sestrin 1                                                                                                                                                                  | <i>Sesn1</i>                                                                    | -1,549454973 | 2,89e-05   |
| Homer homolog 3 (drosophila)                                                                                                                                               | <i>Homer3</i>                                                                   | -1,548911663 | 0,00016445 |
| Microfibrillar associated protein 5                                                                                                                                        | <i>Mfap5</i>                                                                    | -1,548669585 | 0,00044081 |
| F-box protein 4                                                                                                                                                            | <i>Fbxo4</i>                                                                    | -1,547855906 | 0,00013646 |
| Immunoglobulin kappa chain variable 28 (v28) ///<br>immunoglobulin kappa variable 6-14 ///<br>immunoglobulin kappa variable 6-23 ///<br>immunoglobulin kappa variable 8-19 | <i>Igk-v28</i> /// <i>igkv6-14</i><br>/// <i>igkv6-23</i> /// <i>igkv8-19</i>   | -1,547826392 | 0,00196601 |
| Solute carrier family 7 (cationic amino acid<br>transporter, y+ system), member 4                                                                                          | <i>Slc7a4</i>                                                                   | -1,547578476 | 0,00204632 |
| Fibulin 1                                                                                                                                                                  | <i>Fbln1</i>                                                                    | -1,547133402 | 0,00512051 |
| Angiogenic factor with g patch and fha domains 1                                                                                                                           | <i>Aggf1</i>                                                                    | -1,547121331 | 5,65e-05   |
| Calcium binding protein 39-like                                                                                                                                            | <i>Cab39l</i>                                                                   | -1,547021164 | 0,00163887 |

|                                                             |                           |              |            |
|-------------------------------------------------------------|---------------------------|--------------|------------|
| Block of proliferation 1                                    | <i>Bop1</i>               | -1,546415991 | 9,42e-05   |
| Riken cdna 2700097o09 gene                                  | <i>2700097o09rik</i>      | -1,546247253 | 0,00021947 |
| Apurinic/apyrimidinic endonuclease 2                        | <i>Apex2</i>              | -1,545735085 | 0,00019463 |
| Rna binding motif protein 12                                | <i>Rbm12</i>              | -1,54555444  | 0,00556474 |
| Collagen, type xvi, alpha 1                                 | <i>Col16a1</i>            | -1,544953512 | 0,00044841 |
| E2f-associated phosphoprotein                               | <i>Eapp</i>               | -1,543790162 | 0,00102306 |
| Ectodysplasin-a                                             | <i>Eda</i>                | -1,543686479 | 0,00339865 |
| Ankyrin repeat and socs box-containing 13                   | <i>Asb13</i>              | -1,543639646 | 0,00375221 |
| Paired box 5                                                | <i>Pax5</i>               | -1,542960891 | 0,00757378 |
| Microphthalmia-associated transcription factor              | <i>Mitf</i>               | -1,542367705 | 0,00017637 |
| Acyl-coa thioesterase 7                                     | <i>Acot7</i>              | -1,542089937 | 5,02e-05   |
| Ninein                                                      | <i>Nin</i>                | -1,540898709 | 0,00236411 |
| Leucine rich repeat containing 8 family, member c           | <i>Lrrc8c</i>             | -1,54083846  | 0,00061003 |
| Heparan sulfate 6-o-sulfotransferase 3                      | <i>Hs6st3</i>             | -1,540787309 | 0,0003211  |
| Nicalin homolog (zebrafish)                                 | <i>Ncln</i>               | -1,540660786 | 0,00395828 |
| Tyro3 protein tyrosine kinase 3                             | <i>Tyro3</i>              | -1,540360178 | 0,00089989 |
| Riken cdna b230354o11 gene                                  | <i>B230354o11rik</i>      | -1,539934281 | 0,00931584 |
| Guanylyl cyclase domain containing 1                        | <i>Gucd1</i>              | -1,539908767 | 0,00014472 |
| Cytidine monophosphate (ump-cmp) kinase 1                   | <i>Cmpk1</i>              | -1,539813907 | 0,00228754 |
| Adp-ribosylation factor-like 1                              | <i>Arl1</i>               | -1,539722422 | 7,80e-05   |
| Syntaxin 4a (placental)                                     | <i>Stx4a</i>              | -1,539648903 | 0,00113639 |
| Rest corepressor 2                                          | <i>Rcor2</i>              | -1,539599608 | 0,00070975 |
| Thyroglobulin                                               | <i>Tg</i>                 | -1,538840834 | 0,00152681 |
| Hydroxymethylbilane synthase                                | <i>Hmbs</i>               | -1,538385887 | 0,00014695 |
| Heart and neural crest derivatives expressed transcript 1   | <i>Hand1</i>              | -1,538213955 | 0,00021663 |
| T lymphoma oncogene                                         | <i>Tlm</i>                | -1,538097396 | 0,00755071 |
| Furry homolog-like (drosophila)                             | <i>Fryl</i>               | -1,537599728 | 7,11e-05   |
| Erythroid differentiation regulatory factor 1               | <i>Edrf1</i>              | -1,537536865 | 0,0003064  |
| Metallothionein 1                                           | <i>Mt1</i>                | -1,537429929 | 0,00088929 |
| Histone deacetylase 1                                       | <i>Hdac1</i>              | -1,536711308 | 0,00025582 |
| Kruppel-like factor 6                                       | <i>Klf6</i>               | -1,536671115 | 0,00015253 |
| Adaptor-related protein complex 3, mu 2 subunit             | <i>Ap3m2</i>              | -1,536536841 | 0,00931477 |
| Spermatogenesis associated 13                               | <i>Spata13</i>            | -1,536464682 | 0,00054023 |
| Phospholipase c, beta 1                                     | <i>Plcb1</i>              | -1,535403463 | 0,00782274 |
| Polymerase (dna directed), eta (rad 30 related)             | <i>Polh</i>               | -1,535315913 | 0,00647837 |
| Abhydrolase domain containing 16a                           | <i>Abhd16a</i>            | -1,534816431 | 7,54e-05   |
| Period circadian clock 3                                    | <i>Per3</i>               | -1,534766782 | 0,00155474 |
| Ribosomal rna processing 7 homolog a (s. Cerevisiae)        | <i>Rrp7a</i>              | -1,534756575 | 0,00034275 |
| Clathrin, light polypeptide (lcb)                           | <i>Cltb</i>               | -1,534122735 | 0,00035753 |
| Coatomer protein complex, subunit epsilon                   | <i>Cope</i>               | -1,533560924 | 0,00078478 |
| Rna binding motif protein, x-linked 2                       | <i>RbmX2</i>              | -1,533096862 | 0,00088124 |
| Sap domain containing ribonucleoprotein                     | <i>Sarnp</i>              | -1,532999069 | 0,0001546  |
| Predicted gene 14277 /// small nuclear ribonucleoprotein d1 | <i>Gm14277 /// snrpd1</i> | -1,532841869 | 4,45e-05   |

|                                                                                 |                            |              |            |
|---------------------------------------------------------------------------------|----------------------------|--------------|------------|
| Phosphatidylinositol transfer protein, cytoplasmic 1                            | <i>Pitpnc1</i>             | -1,532048465 | 0,00057682 |
| Uracil dna glycosylase                                                          | <i>Ung</i>                 | -1,531722944 | 9,76e-05   |
| Lysine (k)-specific demethylase 2b                                              | <i>Kdm2b</i>               | -1,531710779 | 0,0001145  |
| Retinal degeneration 3                                                          | <i>Rd3</i>                 | -1,530848652 | 0,00949943 |
| Non-smc condensin ii complex, subunit g2                                        | <i>Ncapg2</i>              | -1,530482309 | 0,00145826 |
| Polymerase (dna directed), kappa                                                | <i>Polk</i>                | -1,529635272 | 0,0073413  |
| Leucine rich repeat (in flil) interacting protein 1                             | <i>Lrrfip1</i>             | -1,528851144 | 0,00012094 |
| Annexin a7                                                                      | <i>Anxa7</i>               | -1,527663744 | 0,0001272  |
| Sap30 binding protein                                                           | <i>Sap30bp</i>             | -1,527020018 | 0,00047971 |
| Progesterone receptor                                                           | <i>Pgr</i>                 | -1,526741361 | 0,00138918 |
| Major facilitator superfamily domain containing 1                               | <i>Mfsd1</i>               | -1,52611449  | 0,00490583 |
| Clarin 3                                                                        | <i>Clrn3</i>               | -1,525776212 | 0,00882747 |
| C-abl oncogene 1, non-receptor tyrosine kinase                                  | <i>Abl1</i>                | -1,525470379 | 0,00010637 |
| Cytochrome c, somatic                                                           | <i>Cycs</i>                | -1,525130518 | 6,92e-05   |
| Tetraspanin 33                                                                  | <i>Tspan33</i>             | -1,525095896 | 0,0072781  |
| Transformed mouse 3t3 cell double minute 2                                      | <i>Mdm2</i>                | -1,525090014 | 0,00548875 |
| --- /// predicted gene, 17344                                                   | <i>Gm17344 /// gm17344</i> | -1,525078061 | 0,00911704 |
| Pitrilysin metallopeptidase 1                                                   | <i>Pitrm1</i>              | -1,525006481 | 0,00177412 |
| Rotatin                                                                         | <i>Rttm</i>                | -1,524768628 | 0,00018863 |
| Matrix metallopeptidase 24                                                      | <i>Mmp24</i>               | -1,524627551 | 0,0091575  |
| Nuclear factor i/a                                                              | <i>Nfia</i>                | -1,524207859 | 0,00129647 |
| Vesicle transport through interaction with t-snares 1b                          | <i>Vti1b</i>               | -1,523810953 | 0,00013401 |
| Chimerin 2                                                                      | <i>Chn2</i>                | -1,523689663 | 0,00135188 |
| Sema domain, transmembrane domain (tm), and cytoplasmic domain, (semaphorin) 6d | <i>Sema6d</i>              | -1,523646123 | 7,90e-05   |
| Adenylate cyclase 6                                                             | <i>Adcy6</i>               | -1,523170517 | 0,00019948 |
| Proteasome (prosome, macropain) subunit, beta type 2                            | <i>Psmb2</i>               | -1,52272963  | 4,91e-05   |
| Unc-51 like kinase 2                                                            | <i>Ulk2</i>                | -1,521668715 | 0,00555912 |
| Lim homeobox protein 4                                                          | <i>Lhx4</i>                | -1,521376866 | 0,00185221 |
| Cd276 antigen                                                                   | <i>Cd276</i>               | -1,521298762 | 0,00705355 |
| Diazepam binding inhibitor                                                      | <i>Dbi</i>                 | -1,521151648 | 8,20e-05   |
| Proteasome (prosome, macropain) subunit, alpha type 3                           | <i>Pma3</i>                | -1,520608245 | 3,79e-05   |
| Tetraspanin 9                                                                   | <i>Tspan9</i>              | -1,520536008 | 0,00024448 |
| St3 beta-galactoside alpha-2,3-sialyltransferase 4                              | <i>St3gal4</i>             | -1,520403926 | 0,00353081 |
| Vacuole membrane protein 1                                                      | <i>Vmp1</i>                | -1,519496972 | 0,0010473  |
| Sorting and assembly machinery component 50 homolog (s. Cerevisiae)             | <i>Samm50</i>              | -1,519442893 | 0,00010865 |
| Inhibin alpha                                                                   | <i>Inha</i>                | -1,519423243 | 0,00012004 |
| Dnaj (hsp40) homolog, subfamily c, member 14                                    | <i>Dnajc14</i>             | -1,519365295 | 0,00013496 |
| Twisted gastrulation homolog 1 (drosophila)                                     | <i>Twsg1</i>               | -1,519152607 | 0,00513084 |
| Cdc42 effector protein (rho gtpase binding) 4                                   | <i>Cdc42ep4</i>            | -1,519113018 | 0,00035418 |
| Solute carrier family 8 (sodium/lithium/calcium exchanger), member b1           | <i>Slc8b1</i>              | -1,518630691 | 0,00034231 |

|                                                                                     |                         |              |            |
|-------------------------------------------------------------------------------------|-------------------------|--------------|------------|
| Ww domain containing e3 ubiquitin protein ligase 1                                  | <i>Wwp1</i>             | -1,518330139 | 0,0023667  |
| Mitochondrial ribosomal protein l13                                                 | <i>Mrpl13</i>           | -1,51804331  | 4,01e-05   |
| Late endosomal/lysosomal adaptor, mapk and mtor activator 1                         | <i>Lamtor1</i>          | -1,517973803 | 0,0004874  |
| Exportin 1, crm1 homolog (yeast)                                                    | <i>Xpo1</i>             | -1,517772742 | 0,00094959 |
| Syntaxin 3                                                                          | <i>Stx3</i>             | -1,517587922 | 0,00016356 |
| Chromatin assembly factor 1, subunit b (p60)                                        | <i>Chaf1b</i>           | -1,516720192 | 0,00022715 |
| Steap family member 3                                                               | <i>Steap3</i>           | -1,516642387 | 0,00032146 |
| Aconitase 2, mitochondrial                                                          | <i>Aco2</i>             | -1,516626103 | 8,87e-05   |
| Zyg-11 family member a, cell cycle regulator                                        | <i>Zyg11a</i>           | -1,516086413 | 0,00043004 |
| Pre b cell leukemia homeobox 3                                                      | <i>Pbx3</i>             | -1,516021313 | 6,14e-05   |
| Brick1, scar/wave actin-nucleating complex subunit                                  | <i>Brk1</i>             | -1,515765623 | 0,00020646 |
| Pci domain containing 2                                                             | <i>Pcid2</i>            | -1,515590503 | 0,00070305 |
| Histone cell cycle regulation defective homolog a (s. Cerevisiae)                   | <i>Hira</i>             | -1,515345543 | 0,00087241 |
| Cystatin e/m                                                                        | <i>Cst6</i>             | -1,515316081 | 0,00294544 |
| Centromere protein f                                                                | <i>Cenpf</i>            | -1,515021173 | 0,00036248 |
| Tao kinase 3                                                                        | <i>Taok3</i>            | -1,514904145 | 0,00567216 |
| Creb/atf bzip transcription factor                                                  | <i>Crebzf</i>           | -1,514351974 | 0,00350994 |
| Cobw domain containing 1                                                            | <i>Cbwd1</i>            | -1,514296328 | 0,00013389 |
| Family with sequence similarity 131, member b                                       | <i>Fam131b</i>          | -1,514223054 | 0,00049261 |
| Fanconi anemia, complementation group m                                             | <i>Fancm</i>            | -1,513772111 | 0,00269641 |
| Ribonuclease, rnase a family 4                                                      | <i>Rnase4</i>           | -1,513693939 | 0,00689224 |
| Histone deacetylase 6                                                               | <i>Hdac6</i>            | -1,513241147 | 0,0001192  |
| Pyrimidinergic receptor p2y, g-protein coupled, 6                                   | <i>P2ry6</i>            | -1,512845242 | 0,00017289 |
| Coronin, actin binding protein 1c                                                   | <i>Coro1c</i>           | -1,512677404 | 6,98e-05   |
| Mesoderm induction early response 1, family member 2                                | <i>Mier2</i>            | -1,512637167 | 0,00142643 |
| Synaptophysin-like 2                                                                | <i>Sypl2</i>            | -1,512597825 | 0,0003207  |
| Spectrin repeat containing, nuclear envelope 1                                      | <i>Syne1</i>            | -1,51251212  | 0,0001813  |
| Fibroblast growth factor receptor 1                                                 | <i>Fgfr1</i>            | -1,512154469 | 0,00294866 |
| Tar (hiv) rna binding protein 2                                                     | <i>Tarbp2</i>           | -1,511889504 | 0,00014964 |
| Atp-binding cassette, sub-family a (abc1), member 3                                 | <i>Abca3</i>            | -1,511586999 | 0,0004036  |
| U2 small nuclear rna auxiliary factor 1-like 4                                      | <i>U2af1l4</i>          | -1,511560495 | 0,00035814 |
| Was/wasl interacting protein family, member 1                                       | <i>Wipf1</i>            | -1,511103289 | 0,00518371 |
| Lectin, galactose binding, soluble 8                                                | <i>Lgals8</i>           | -1,511070602 | 0,00019724 |
| Predicted gene 12693 /// rwd domain containing 1                                    | <i>Gm12693 /// rwd1</i> | -1,510957314 | 0,00776905 |
| Riken cdna 1110059e24 gene                                                          | <i>1110059e24rik</i>    | -1,510247282 | 4,96e-05   |
| Integrin alpha 2b                                                                   | <i>Itga2b</i>           | -1,509803539 | 0,00612549 |
| Solute carrier family 39 (metal ion transporter), member 8                          | <i>Slc39a8</i>          | -1,508953084 | 0,000191   |
| Zinc finger, dhhc domain containing 8                                               | <i>Zdhhc8</i>           | -1,508573991 | 0,00044153 |
| Zinc finger ccch-type containing 18                                                 | <i>Zc3h18</i>           | -1,507895502 | 0,00032569 |
| Ctd (carboxy-terminal domain, rna polymerase ii, polypeptide a) small phosphatase 2 | <i>Ctdsp2</i>           | -1,507660585 | 0,00015708 |
| Predicted gene 12606                                                                | <i>Gm12606</i>          | -1,507571109 | 0,0005102  |
| Histocompatibility 13                                                               | <i>H13</i>              | -1,5073241   | 0,00016363 |

|                                                                                                                                |                                               |              |            |
|--------------------------------------------------------------------------------------------------------------------------------|-----------------------------------------------|--------------|------------|
| Williams beuren syndrome chromosome region 22                                                                                  | <i>Wbscr22</i>                                | -1,507117187 | 0,00023733 |
| Dead (asp-glu-ala-asp) box polypeptide 27                                                                                      | <i>Ddx27</i>                                  | -1,506752937 | 0,00041622 |
| Fig4 homolog (s. Cerevisiae)                                                                                                   | <i>Fig4</i>                                   | -1,506172111 | 0,00029147 |
| Ras association (ralgds/af-6) domain family member 3                                                                           | <i>Rassf3</i>                                 | -1,505801163 | 0,00025651 |
| Farnesyltransferase, caax box, alpha                                                                                           | <i>Fnta</i>                                   | -1,504690889 | 0,00018562 |
| Dihydropyrimidinase-like 3                                                                                                     | <i>Dpysl3</i>                                 | -1,504517832 | 6,29e-05   |
| Predicted gene 10193 /// zinc finger protein 706                                                                               | <i>Gm10193 /// zfp706</i>                     | -1,504275662 | 0,00087353 |
| Serine/arginine-rich splicing factor 10                                                                                        | <i>Srsf10</i>                                 | -1,504221979 | 0,00294384 |
| Rab13, member ras oncogene family                                                                                              | <i>Rab13</i>                                  | -1,503709351 | 0,00113681 |
| Serine/arginine-rich splicing factor 9                                                                                         | <i>Srsf9</i>                                  | -1,503074335 | 9,39e-05   |
| Cdk2 (cyclin-dependent kinase 2)-associated protein 1                                                                          | <i>Cdk2ap1</i>                                | -1,50276874  | 7,44e-05   |
| Phospholipase c, gamma 1                                                                                                       | <i>Plcg1</i>                                  | -1,502203627 | 0,00147251 |
| Activating transcription factor 7 interacting protein                                                                          | <i>Atf7ip</i>                                 | -1,502062913 | 0,00154957 |
| Calcium homeostasis endoplasmic reticulum protein                                                                              | <i>Cherp</i>                                  | -1,501818075 | 0,00012715 |
| Submaxillary gland androgen regulated protein 2                                                                                | <i>Smr2</i>                                   | -1,501460088 | 0,00055519 |
| Nuclear pore membrane protein 121                                                                                              | <i>Pom121</i>                                 | -1,501312411 | 0,00131045 |
| Anaphase promoting complex subunit 4                                                                                           | <i>Anapc4</i>                                 | -1,499905456 | 8,44e-05   |
| Kinesin family member 13a                                                                                                      | <i>Kif13a</i>                                 | -1,499608119 | 0,00011249 |
| Meiotic recombination 11 homolog a (s. Cerevisiae)                                                                             | <i>Mre11a</i>                                 | -1,499367902 | 0,00147251 |
| Nuclear factor of activated t cells, cytoplasmic, calcineurin dependent 2 interacting protein                                  | <i>Nfatc2ip</i>                               | -1,499341494 | 0,00086826 |
| Zinc finger, cchc domain containing 14                                                                                         | <i>Zcchc14</i>                                | -1,499209715 | 0,00042846 |
| Early endosome antigen 1                                                                                                       | <i>Eea1</i>                                   | -1,49902016  | 0,00029008 |
| Peroxisomal biogenesis factor 5                                                                                                | <i>Pex5</i>                                   | -1,498861657 | 0,00054464 |
| Eukaryotic translation initiation factor 2d                                                                                    | <i>Eif2d</i>                                  | -1,498790631 | 0,00181705 |
| Solute carrier family 35, member c2                                                                                            | <i>Slc35c2</i>                                | -1,498748754 | 0,00441103 |
| Cdc16 cell division cycle 16                                                                                                   | <i>Cdc16</i>                                  | -1,498668475 | 0,00042063 |
| Predicted gene 15453 /// rna binding motif protein 3                                                                           | <i>Gm15453 /// rbm3</i>                       | -1,498505013 | 0,00042666 |
| Olfactory receptor 70                                                                                                          | <i>Olfir70</i>                                | -1,497648885 | 0,00459564 |
| Topoisomerase (dna) ii binding protein 1                                                                                       | <i>Topbp1</i>                                 | -1,497351156 | 0,00099161 |
| Zinc finger protein 787                                                                                                        | <i>Zfp787</i>                                 | -1,497290477 | 0,00565027 |
| Predicted gene, 21596 /// predicted gene 6115 /// high mobility group box 1                                                    | <i>Gm21596 /// gm6115 /// hmgb1</i>           | -1,497145705 | 0,00019463 |
| Membrane associated guanylate kinase, ww and pdz domain containing 1                                                           | <i>Magi1</i>                                  | -1,495957217 | 0,00012184 |
| Chemokine (c-c motif) ligand 17                                                                                                | <i>Ccl17</i>                                  | -1,495850682 | 0,00951951 |
| Dysbindin (dystrobrevin binding protein 1) domain containing 1                                                                 | <i>Dbnbd1</i>                                 | -1,495689894 | 0,00882607 |
| Nudix (nucleoside diphosphate linked moiety x)-type motif 1                                                                    | <i>Nudt1</i>                                  | -1,495050362 | 0,00014345 |
| Predicted gene 6750 /// predicted pseudogene 7931 /// predicted gene 9525 /// high mobility group nucleosomal binding domain 2 | <i>Gm6750 /// gm7931 /// gm9525 /// hmgn2</i> | -1,494937969 | 0,00013076 |
| Polyhomeotic-like 2 (drosophila)                                                                                               | <i>Phc2</i>                                   | -1,494099794 | 0,00050436 |
| Ribonuclease/angiogenin inhibitor 1                                                                                            | <i>Rnh1</i>                                   | -1,494081613 | 8,93e-05   |
| Splicing factor 3b, subunit 5                                                                                                  | <i>Sf3b5</i>                                  | -1,494069725 | 0,00015262 |

|                                                                                                         |                                                   |              |            |
|---------------------------------------------------------------------------------------------------------|---------------------------------------------------|--------------|------------|
| Riken cdna a030005k14 gene                                                                              | <i>A030005k14rik</i>                              | -1,493889754 | 0,00624337 |
| Nucleolar and coiled-body phosphoprotein 1                                                              | <i>Nolc1</i>                                      | -1,493218158 | 0,00030904 |
| Solute carrier family 11 (proton-coupled divalent metal ion transporters), member 2                     | <i>Slc11a2</i>                                    | -1,493097958 | 0,00756131 |
| Eh-domain containing 2                                                                                  | <i>Ehd2</i>                                       | -1,493020341 | 0,00014964 |
| Methyl-cpg binding domain protein 1                                                                     | <i>Mbd1</i>                                       | -1,492754175 | 0,0052392  |
| Ras related protein 1b                                                                                  | <i>Rap1b</i>                                      | -1,492620173 | 0,00785121 |
| Sex comb on midleg homolog 1                                                                            | <i>Scmh1</i>                                      | -1,492033538 | 0,00048874 |
| Rab7, member ras oncogene family                                                                        | <i>Rab7</i>                                       | -1,491866256 | 0,00373823 |
| Mitogen-activated protein kinase kinase 3, opposite strand                                              | <i>Map2k3os</i>                                   | -1,491663482 | 0,00012279 |
| Zinc finger, an1-type domain 2a                                                                         | <i>Zfand2a</i>                                    | -1,491638783 | 0,00025116 |
| Transducin (beta)-like 2                                                                                | <i>Tbl2</i>                                       | -1,490842604 | 0,00012225 |
| Signal recognition particle 54a /// signal recognition particle 54b /// signal recognition particle 54c | <i>Srp54a</i> /// <i>srp54b</i> /// <i>srp54c</i> | -1,490112867 | 0,00033201 |
| Glycolipid transfer protein                                                                             | <i>Gltp</i>                                       | -1,489811096 | 0,00435351 |
| Microtubule associated serine/threonine kinase 2                                                        | <i>Mast2</i>                                      | -1,488270457 | 0,00049594 |
| Cdc28 protein kinase 1b                                                                                 | <i>Cks1b</i>                                      | -1,488254743 | 0,00044944 |
| Small proline-rich protein 2f                                                                           | <i>Sprr2f</i>                                     | -1,488180013 | 0,00025643 |
| Plasminogen activator, urokinase                                                                        | <i>Plau</i>                                       | -1,488068288 | 0,00018662 |
| Deoxynucleotidyltransferase, terminal, interacting protein 1                                            | <i>Dnttip1</i>                                    | -1,487476686 | 9,75e-05   |
| General transcription factor iiic, polypeptide 2, beta                                                  | <i>Gtf3c2</i>                                     | -1,487346162 | 0,00072934 |
| Moloney leukemia virus 10-like 1                                                                        | <i>Mov10l1</i>                                    | -1,486790173 | 0,00897275 |
| Ubiquitin protein ligase e3c                                                                            | <i>Ube3c</i>                                      | -1,486725489 | 0,00011394 |
| Ankyrin repeat domain 44                                                                                | <i>Ankrd44</i>                                    | -1,486317945 | 0,00057467 |
| Claudin 10                                                                                              | <i>Cldn10</i>                                     | -1,486243501 | 0,00795613 |
| Epithelial stromal interaction 1 (breast)                                                               | <i>Epsti1</i>                                     | -1,48620382  | 0,00893139 |
| Inhibitor of dna binding 3                                                                              | <i>Id3</i>                                        | -1,485727663 | 9,02e-05   |
| Proteasome maturation protein                                                                           | <i>Pomp</i>                                       | -1,485425259 | 0,0001192  |
| Udp-glucose dehydrogenase                                                                               | <i>Ugdh</i>                                       | -1,484914997 | 0,00075064 |
| Dna segment, chr 4, erato doi 117, expressed                                                            | <i>D4ertd117e</i>                                 | -1,484710723 | 0,00600364 |
| Microtubule-associated protein, rp/eb family, member 1                                                  | <i>Mapre1</i>                                     | -1,484635443 | 0,00159374 |
| Intermediate filament family orphan 2                                                                   | <i>Iffo2</i>                                      | -1,484633272 | 0,00279617 |
| Bms1 homolog, ribosome assembly protein (yeast)                                                         | <i>Bms1</i>                                       | -1,483625661 | 0,00095873 |
| Sorting nexin 29                                                                                        | <i>Snx29</i>                                      | -1,483620785 | 0,00025733 |
| Tripartite motif-containing 12a                                                                         | <i>Trim12a</i>                                    | -1,48286217  | 0,00672338 |
| Myeloblastosis oncogene-like 2                                                                          | <i>Mybl2</i>                                      | -1,48278446  | 8,09e-05   |
| Melanoma associated antigen (mutated) 1                                                                 | <i>Mum1</i>                                       | -1,482563758 | 0,0003143  |
| Basal cell adhesion molecule                                                                            | <i>Bcam</i>                                       | -1,482563743 | 0,00244164 |
| Predicted pseudogene 9769 /// prostaglandin e synthase 3 (cytosolic)                                    | <i>Gm9769</i> /// <i>ptges3</i>                   | -1,482538171 | 8,22e-05   |
| Spastin                                                                                                 | <i>Spast</i>                                      | -1,48243704  | 0,00139483 |
| Predicted gene 15455 /// rna binding motif protein 10                                                   | <i>Gm15455</i> /// <i>rbm10</i>                   | -1,482090856 | 0,00012345 |
| Cklf-like marvel transmembrane domain containing 8                                                      | <i>Cmtm8</i>                                      | -1,482001978 | 0,00021184 |



|                                                                                                                                                                                                                                                                               |                                                    |              |            |
|-------------------------------------------------------------------------------------------------------------------------------------------------------------------------------------------------------------------------------------------------------------------------------|----------------------------------------------------|--------------|------------|
| Non-smc element 1 homolog (s. Cerevisiae)                                                                                                                                                                                                                                     | <i>Nsmce1</i>                                      | -1,481998534 | 0,00073087 |
| Ceramide synthase 4                                                                                                                                                                                                                                                           | <i>Cers4</i>                                       | -1,481778916 | 0,00044084 |
| Ubiquinol-cytochrome c reductase hinge protein                                                                                                                                                                                                                                | <i>Uqcrh</i>                                       | -1,480900652 | 0,00034511 |
| Cysteine rich, dpf motif domain containing 1                                                                                                                                                                                                                                  | <i>Cdpf1</i>                                       | -1,480623762 | 0,00020322 |
| Atpase, h+/k+ exchanging, gastric, alpha polypeptide                                                                                                                                                                                                                          | <i>Atp4a</i>                                       | -1,480415184 | 0,00184603 |
| Cadherin 11 pseudogene                                                                                                                                                                                                                                                        | <i>2610005l07rik</i>                               | -1,4802921   | 0,00555378 |
| Brx1, biogenesis of ribosomes, homolog (s. Cerevisiae)                                                                                                                                                                                                                        | <i>Brix1</i>                                       | -1,480251952 | 0,00022415 |
| Solute carrier family 13 (sodium-dependent dicarboxylate transporter), member 3                                                                                                                                                                                               | <i>Slc13a3</i>                                     | -1,480153729 | 0,0043547  |
| Cdna sequence bc029722                                                                                                                                                                                                                                                        | <i>Bc029722</i>                                    | -1,480062854 | 0,00092711 |
| Glutathione synthetase                                                                                                                                                                                                                                                        | <i>Gss</i>                                         | -1,479931893 | 0,00014767 |
| Ubiquitin specific peptidase 39                                                                                                                                                                                                                                               | <i>Usp39</i>                                       | -1,479921406 | 0,00027773 |
| Glyceronephosphate o-acyltransferase                                                                                                                                                                                                                                          | <i>Gnpat</i>                                       | -1,479193911 | 6,95e-05   |
| H2a histone family, member j                                                                                                                                                                                                                                                  | <i>H2afj</i>                                       | -1,479085872 | 0,00044081 |
| Slc10a3-ubl4 readthrough /// ubiquitin-like 4                                                                                                                                                                                                                                 | <i>Slc10a3-ubl4 /// ubl4</i>                       | -1,478899662 | 0,00035454 |
| Myosin, light polypeptide 6, alkali, smooth muscle and non-muscle pseudogene /// myosin light polypeptide 6 alkali smooth muscle and non-muscle protein, pseudogene /// myosin light polypeptide 6-like /// myosin, light polypeptide 6, alkali, smooth muscle and non-muscle | <i>Gm5526 /// gm8894 /// loc102643184 /// myl6</i> | -1,478774236 | 0,0001118  |
| Udp-gal:betaglcnac beta 1,4- galactosyltransferase, polypeptide 1                                                                                                                                                                                                             | <i>B4galt1</i>                                     | -1,47866815  | 0,00027711 |
| Mediator complex subunit 10                                                                                                                                                                                                                                                   | <i>Med10</i>                                       | -1,478496832 | 9,66e-05   |
| Lymphocyte antigen 6 complex, locus i                                                                                                                                                                                                                                         | <i>Ly6i</i>                                        | -1,478307488 | 0,00471572 |
| Claudin 23                                                                                                                                                                                                                                                                    | <i>Cldn23</i>                                      | -1,478283646 | 0,00079655 |
| Elongation factor tu gtp binding domain containing 2                                                                                                                                                                                                                          | <i>Eftud2</i>                                      | -1,478056237 | 0,00150893 |
| Riken cdna 2010012o05 gene                                                                                                                                                                                                                                                    | <i>2010012o05rik</i>                               | -1,47781782  | 0,00099311 |
| Karyopherin (importin) alpha 6                                                                                                                                                                                                                                                | <i>Kpna6</i>                                       | -1,477760087 | 0,00109608 |
| Ndc80 homolog, kinetochore complex component pseudogene                                                                                                                                                                                                                       | <i>2700099c18rik</i>                               | -1,477305211 | 0,00172354 |
| Protein tyrosine phosphatase, receptor type, m                                                                                                                                                                                                                                | <i>Ptpm</i>                                        | -1,47656057  | 0,00015524 |
| Follistatin-like 3                                                                                                                                                                                                                                                            | <i>Fstl3</i>                                       | -1,476494433 | 0,00087649 |
| Pih1 domain containing 1                                                                                                                                                                                                                                                      | <i>Pih1d1</i>                                      | -1,476422691 | 0,00015667 |
| Tyrosine 3-monooxygenase/tryptophan 5-monooxygenase activation protein, zeta polypeptide                                                                                                                                                                                      | <i>Ywhaz</i>                                       | -1,475824029 | 0,00298187 |
| Sec31 homolog a (s. Cerevisiae)                                                                                                                                                                                                                                               | <i>Sec31a</i>                                      | -1,475380003 | 0,00051141 |
| Tubulin, alpha 1b pseudogene /// tubulin, alpha 1b                                                                                                                                                                                                                            | <i>Gm5620 /// tuba1b</i>                           | -1,475316439 | 6,31e-05   |
| Serine protease inhibitor 16                                                                                                                                                                                                                                                  | <i>Spi16</i>                                       | -1,475040925 | 0,00959363 |
| Fermitin family homolog 2 (drosophila)                                                                                                                                                                                                                                        | <i>Fermt2</i>                                      | -1,474899486 | 0,001299   |
| Centromere protein t                                                                                                                                                                                                                                                          | <i>Cenpt</i>                                       | -1,474893448 | 0,00047545 |
| Cytochrome b5 type b                                                                                                                                                                                                                                                          | <i>Cyb5b</i>                                       | -1,474608889 | 0,00092647 |
| Optic atrophy 3                                                                                                                                                                                                                                                               | <i>Opa3</i>                                        | -1,47442509  | 0,00150385 |
| Tdp-glucose 4,6-dehydratase                                                                                                                                                                                                                                                   | <i>Tgds</i>                                        | -1,474014591 | 0,00989754 |
| Calpain 12                                                                                                                                                                                                                                                                    | <i>Capn12</i>                                      | -1,473759113 | 0,00531904 |
| Metal response element binding transcription factor 1                                                                                                                                                                                                                         | <i>Mtf1</i>                                        | -1,473269414 | 0,00075341 |

|                                                                                           |                      |              |            |
|-------------------------------------------------------------------------------------------|----------------------|--------------|------------|
| Riken cdna 1110004e09 gene                                                                | <i>1110004e09rik</i> | -1,473263504 | 0,00459917 |
| Prohibitin 2                                                                              | <i>Phb2</i>          | -1,473074102 | 0,00375628 |
| Tho complex 3                                                                             | <i>Thoc3</i>         | -1,472858657 | 0,00189483 |
| Adp-ribosylation factor 5                                                                 | <i>Arf5</i>          | -1,472538177 | 0,0006084  |
| Cleavage and polyadenylation specific factor 3-like                                       | <i>Cpsf3l</i>        | -1,472065807 | 0,00017348 |
| Centromere protein c1                                                                     | <i>Cenpc1</i>        | -1,471716894 | 0,00822584 |
| Recq protein-like                                                                         | <i>Recql</i>         | -1,471686554 | 0,00010189 |
| Zinc finger protein 207                                                                   | <i>Zfp207</i>        | -1,47144352  | 0,00234805 |
| Tudor domain containing 3                                                                 | <i>Tdrd3</i>         | -1,471378594 | 0,00195568 |
| Potassium intermediate/small conductance calcium-activated channel, subfamily n, member 2 | <i>Kcnn2</i>         | -1,471365359 | 0,00517724 |
| C-type lectin domain family 4, member g                                                   | <i>Clec4g</i>        | -1,471103559 | 0,00316504 |
| D4, zinc and double phd fingers family 1                                                  | <i>Dpf1</i>          | -1,470296726 | 0,0062333  |
| Cysteine-rich protein 3                                                                   | <i>Crip3</i>         | -1,470199355 | 0,00748619 |
| Riken cdna 2310011j03 gene                                                                | <i>2310011j03rik</i> | -1,47011342  | 7,64e-05   |
| B cell cll/lymphoma 7c                                                                    | <i>Bcl7c</i>         | -1,4691673   | 0,00164355 |
| Fizzy/cell division cycle 20 related 1 (drosophila)                                       | <i>Fzr1</i>          | -1,469135605 | 0,00419534 |
| Sumo1 activating enzyme subunit 1                                                         | <i>Sae1</i>          | -1,469071044 | 0,00389022 |
| Pseudopodium-enriched atypical kinase 1                                                   | <i>Peak1</i>         | -1,468543247 | 0,00200734 |
| Olfactory receptor 66                                                                     | <i>Olfr66</i>        | -1,468198474 | 0,00624628 |
| Heterogeneous nuclear ribonucleoprotein d                                                 | <i>Hnrnpd</i>        | -1,46802343  | 0,00745607 |
| Ubiquitin protein ligase e3 component n-recognin 2                                        | <i>Ubr2</i>          | -1,467695656 | 0,00073086 |
| Glutathione s-transferase, mu 7                                                           | <i>Gstm7</i>         | -1,467442367 | 0,00176696 |
| Cd7 antigen                                                                               | <i>Cd7</i>           | -1,467123257 | 0,00564962 |
| Predicted gene, 26672                                                                     | <i>Gm26672</i>       | -1,466998082 | 0,00290875 |
| Brain glycogen phosphorylase                                                              | <i>Pygb</i>          | -1,466959421 | 0,0001516  |
| Transmembrane protein 106b                                                                | <i>Tmem106b</i>      | -1,466862144 | 0,00256361 |
| N-deacetylase/n-sulfotransferase (heparan glucosaminyl) 3                                 | <i>Ndst3</i>         | -1,466859989 | 0,00069102 |
| Potassium voltage-gated channel, shaker-related subfamily, beta member 2                  | <i>Kcnab2</i>        | -1,466806284 | 0,00846077 |
| Glutamate receptor, ionotropic, nmda2b (epsilon 2)                                        | <i>Grin2b</i>        | -1,466801115 | 0,00653568 |
| Riken cdna 1110001j03 gene                                                                | <i>1110001j03rik</i> | -1,466460354 | 0,00084238 |
| Family with sequence similarity 81, member a                                              | <i>Fam81a</i>        | -1,466452117 | 0,00090463 |
| Calcium channel, voltage-dependent, alpha2/delta subunit 1                                | <i>Cacna2d1</i>      | -1,466013437 | 0,00492574 |
| Eukaryotic translation elongation factor 1 delta (guanine nucleotide exchange protein)    | <i>Eef1d</i>         | -1,465532166 | 0,00017135 |
| Transcription factor 7 like 1 (t cell specific, hmg box)                                  | <i>Tcf7l1</i>        | -1,465426531 | 0,00274214 |
| Natriuretic peptide type b                                                                | <i>Nppb</i>          | -1,465426198 | 0,00043173 |
| Interferon alpha 5                                                                        | <i>Ifna5</i>         | -1,465019339 | 0,0027345  |
| Caprin family member 2                                                                    | <i>Caprin2</i>       | -1,464997977 | 0,00449362 |
| Oxysterol binding protein-like 9                                                          | <i>Osbp19</i>        | -1,464912306 | 0,00662825 |
| Pyridoxal (pyridoxine, vitamin b6) phosphatase                                            | <i>Pdcp</i>          | -1,464244811 | 0,0003191  |
| Plexin b2                                                                                 | <i>Plxnb2</i>        | -1,464197908 | 0,00137812 |
| Ankyrin repeat domain 17                                                                  | <i>Ankrd17</i>       | -1,464185098 | 0,00068139 |
| Rho family gtpase 2                                                                       | <i>Rnd2</i>          | -1,463897592 | 0,0008907  |

|                                                                                                             |                                 |              |            |
|-------------------------------------------------------------------------------------------------------------|---------------------------------|--------------|------------|
| Tam41, mitochondrial translocator assembly and maintenance protein, homolog (s. Cerevisiae)                 | <i>Tamm41</i>                   | -1,463629815 | 0,00024709 |
| Mob kinase activator 1b                                                                                     | <i>Mob1b</i>                    | -1,462922442 | 0,00011744 |
| Ubiquitin interaction motif containing 1                                                                    | <i>Uimc1</i>                    | -1,462829857 | 0,00017431 |
| Eps8-like 1                                                                                                 | <i>Eps8l1</i>                   | -1,461933252 | 0,00852365 |
| Ewing sarcoma breakpoint region 1                                                                           | <i>Ewsr1</i>                    | -1,461849859 | 0,00046337 |
| Daz associated protein 2 /// predicted gene 2444                                                            | <i>Dazap2</i> /// <i>gm2444</i> | -1,461834357 | 0,00027876 |
| Cd82 antigen                                                                                                | <i>Cd82</i>                     | -1,461550798 | 0,00830559 |
| Myosin ib                                                                                                   | <i>Myo1b</i>                    | -1,461512844 | 0,00143315 |
| Tripartite motif-containing 60                                                                              | <i>Trim60</i>                   | -1,461331963 | 0,00306484 |
| Putative homeodomain transcription factor 2                                                                 | <i>Phtf2</i>                    | -1,46061258  | 0,00158844 |
| Gins complex subunit 1 (psf1 homolog)                                                                       | <i>Gins1</i>                    | -1,460507128 | 0,00094285 |
| Myosin, heavy polypeptide 6, cardiac muscle, alpha<br>/// myosin, heavy polypeptide 7, cardiac muscle, beta | <i>Myh6</i> /// <i>myh7</i>     | -1,460363334 | 0,00220444 |
| Iq motif containing c                                                                                       | <i>Iqcc</i>                     | -1,460284914 | 0,00245637 |
| Polymerase (dna-directed), delta 4                                                                          | <i>Pold4</i>                    | -1,460268752 | 0,00042846 |
| C-mer proto-oncogene tyrosine kinase                                                                        | <i>Mertk</i>                    | -1,460085203 | 0,00050047 |
| Translin-associated factor x                                                                                | <i>Tsnax</i>                    | -1,460014682 | 0,00021132 |
| Calpain, small subunit 1                                                                                    | <i>Capns1</i>                   | -1,459918337 | 0,00053212 |
| Solute carrier family 22 (organic cation transporter), member 17                                            | <i>Slc22a17</i>                 | -1,45926041  | 0,00395828 |
| Sparc/osteonectin, cwcv and kazal-like domains proteoglycan 1                                               | <i>Spock1</i>                   | -1,459175204 | 0,00091846 |
| Rna binding motif, single stranded interacting protein 2                                                    | <i>Rbms2</i>                    | -1,458819485 | 0,00068855 |
| Nuclear receptor subfamily 2, group f, member 6                                                             | <i>Nr2f6</i>                    | -1,458601814 | 0,00166707 |
| Myeloid/lymphoid or mixed-lineage leukemia (trithorax homolog, drosophila); translocated to, 1              | <i>Mllt1</i>                    | -1,458129759 | 0,00361887 |
| Succinate-coenzyme a ligase, gdp-forming, beta subunit                                                      | <i>Suclg2</i>                   | -1,458099734 | 0,00656062 |
| Sirtuin 1                                                                                                   | <i>Sirt1</i>                    | -1,457091965 | 0,00186416 |
| Hypoxia inducible factor 1, alpha subunit                                                                   | <i>Hif1a</i>                    | -1,456769255 | 0,00021421 |
| Prostate androgen-regulated mucin-like protein 1                                                            | <i>Parm1</i>                    | -1,456281296 | 0,00289745 |
| Sry (sex determining region y)-box 4                                                                        | <i>Sox4</i>                     | -1,456269103 | 0,00180612 |
| F11 receptor                                                                                                | <i>F11r</i>                     | -1,455486348 | 0,00254198 |
| Sphingomyelin phosphodiesterase 4                                                                           | <i>Smpd4</i>                    | -1,455028008 | 0,00238059 |
| Polymerase (dna directed), gamma                                                                            | <i>Polg</i>                     | -1,454228633 | 0,00044395 |
| Asparagine-linked glycosylation 9 (alpha 1,2 mannosyltransferase)                                           | <i>Alg9</i>                     | -1,453879041 | 0,00089716 |
| Rad51 homolog                                                                                               | <i>Rad51</i>                    | -1,453417465 | 0,00822584 |
| General transcription factor ii e, polypeptide 2 (beta subunit)                                             | <i>Gtf2e2</i>                   | -1,45322503  | 0,00143315 |
| Heterogeneous nuclear ribonucleoprotein h1                                                                  | <i>Hnrnp1</i>                   | -1,453109132 | 0,00353396 |
| Heterogeneous nuclear ribonucleoprotein m                                                                   | <i>Hnrnpm</i>                   | -1,452952933 | 0,00024589 |
| Alveolar soft part sarcoma chromosome region, candidate 1 (human)                                           | <i>Aspscr1</i>                  | -1,452902898 | 0,00024006 |
| Minichromosome maintenance deficient 4 homolog (s. Cerevisiae)                                              | <i>Mcm4</i>                     | -1,452577816 | 0,00656616 |
| Potassium channel tetramerisation domain containing 20                                                      | <i>Kctd20</i>                   | -1,452436974 | 0,00048567 |

|                                                                                               |                              |              |            |
|-----------------------------------------------------------------------------------------------|------------------------------|--------------|------------|
| Rab3a interacting protein                                                                     | <i>Rab3ip</i>                | -1,451999677 | 0,00062558 |
| Eukaryotic translation initiation factor 4b                                                   | <i>Eif4b</i>                 | -1,451950493 | 0,00018783 |
| Dnaj (hsp40) homolog, subfamily c, member 17                                                  | <i>Dnajc17</i>               | -1,451470026 | 0,00105045 |
| Solute carrier family 9 (sodium/hydrogen exchanger), member 1                                 | <i>Slc9a1</i>                | -1,450783605 | 0,00063694 |
| Frizzled homolog 5 (drosophila)                                                               | <i>Fzd5</i>                  | -1,450782905 | 0,00544602 |
| Cdp-diacylglycerol synthase (phosphatidate cytidyltransferase) 2                              | <i>Cds2</i>                  | -1,450716633 | 0,00033278 |
| Sh3 binding domain protein 5 like                                                             | <i>Sh3bp5l</i>               | -1,450663388 | 0,00028272 |
| Fk506 binding protein 3                                                                       | <i>Fkbp3</i>                 | -1,450330133 | 0,00722345 |
| H1 histone family, member x                                                                   | <i>H1fx</i>                  | -1,45031111  | 0,00044583 |
| Pds5, regulator of cohesion maintenance, homolog a (s. Cerevisiae)                            | <i>Pds5a</i>                 | -1,449649243 | 0,00954046 |
| Single-pass membrane protein with coiled-coil domains 4                                       | <i>Smco4</i>                 | -1,449523398 | 0,00182679 |
| Malonyl coa:acp acyltransferase (mitochondrial)                                               | <i>Mcat</i>                  | -1,44934441  | 0,0001142  |
| Nucleosome assembly protein 1-like 1                                                          | <i>Nap1l1</i>                | -1,44898206  | 0,00179513 |
| Gamma-aminobutyric acid (gaba) b receptor, 1                                                  | <i>Gabbr1</i>                | -1,448927854 | 0,00348581 |
| Phd finger protein 7                                                                          | <i>Phf7</i>                  | -1,448611234 | 0,00155955 |
| S100 calcium binding protein a6 (calcyclin)                                                   | <i>S100a6</i>                | -1,447631468 | 0,00010023 |
| Ubiquitin family domain containing 1                                                          | <i>Ubfd1</i>                 | -1,447522089 | 0,00098955 |
| Protein kinase, membrane associated tyrosine/threonine 1                                      | <i>Pkmyt1</i>                | -1,446813032 | 0,00504549 |
| Deoxyribonuclease 1-like 2                                                                    | <i>Dnase1l2</i>              | -1,446624214 | 0,00353331 |
| Angiotensin i converting enzyme (peptidyl-dipeptidase a) 2                                    | <i>Ace2</i>                  | -1,446541225 | 0,00548131 |
| Charged multivesicular body protein 3                                                         | <i>Chmp3</i>                 | -1,446158914 | 0,00174965 |
| Component of oligomeric golgi complex 1 /// conserved oligomeric golgi complex subunit 1-like | <i>Cog1 /// loc102641618</i> | -1,446010766 | 0,00073313 |
| Arginase type ii                                                                              | <i>Arg2</i>                  | -1,445765795 | 0,00238371 |
| Adducin 1 (alpha)                                                                             | <i>Add1</i>                  | -1,445649804 | 0,00026609 |
| Transmembrane and coiled-coil domains 6                                                       | <i>Tmco6</i>                 | -1,445413795 | 0,00052334 |
| Apolipoprotein a-ii                                                                           | <i>Apoa2</i>                 | -1,445398171 | 0,00642073 |
| Transmembrane protein 97                                                                      | <i>Tmem97</i>                | -1,445394889 | 0,00243614 |
| Transmembrane bax inhibitor motif containing 6                                                | <i>Tmbim6</i>                | -1,445269631 | 0,00111027 |
| Stimulated by retinoic acid 13                                                                | <i>Stra13</i>                | -1,445252731 | 0,00198521 |
| Prolactin receptor                                                                            | <i>Prlr</i>                  | -1,445182932 | 0,00839063 |
| Indoleamine 2,3-dioxygenase 1                                                                 | <i>Ido1</i>                  | -1,444564081 | 0,0010338  |
| Aquaporin 2                                                                                   | <i>Aqp2</i>                  | -1,444468768 | 0,00555912 |
| Scl/tal1 interrupting locus                                                                   | <i>Stil</i>                  | -1,443479432 | 0,00460778 |
| Adp-ribosylhydrolase like 2                                                                   | <i>Adprhl2</i>               | -1,443216742 | 0,00083667 |
| Fanconi anemia, complementation group c                                                       | <i>Fancc</i>                 | -1,443040447 | 0,00072165 |
| Small nuclear ribonucleoprotein 27 (u4/u6.u5)                                                 | <i>Snrnp27</i>               | -1,44254913  | 0,00015884 |
| Potassium channel tetramerisation domain containing 9                                         | <i>Kctd9</i>                 | -1,442443674 | 0,00368403 |
| Charged multivesicular body protein 1a                                                        | <i>Chmp1a</i>                | -1,442220008 | 0,00034325 |
| Abhydrolase domain containing 1                                                               | <i>Abhd1</i>                 | -1,442052019 | 0,00313654 |
| Ribosomal rna processing 1 homolog (s. Cerevisiae)                                            | <i>Rrp1</i>                  | -1,441876177 | 0,00226    |

|                                                                                                     |                                                  |              |            |
|-----------------------------------------------------------------------------------------------------|--------------------------------------------------|--------------|------------|
| Family with sequence similarity 43, member a                                                        | <i>Fam43a</i>                                    | -1,441630839 | 0,00056301 |
| Neuroguidin, eif4e binding protein                                                                  | <i>Ngdn</i>                                      | -1,441627344 | 0,00104396 |
| Gephyrin                                                                                            | <i>Gphn</i>                                      | -1,441266048 | 0,00055159 |
| Small glutamine-rich tetratricopeptide repeat (tpr)-containing, beta                                | <i>Sgtb</i>                                      | -1,441229763 | 0,00053529 |
| Adrenergic receptor kinase, beta 1                                                                  | <i>Adrbk1</i>                                    | -1,440870434 | 0,00306666 |
| Regulation of nuclear pre-mrna domain containing 1b                                                 | <i>Rprd1b</i>                                    | -1,440771634 | 0,00056124 |
| Elongation of very long chain fatty acids (fen1/elo2, sur4/elo3, yeast)-like 1                      | <i>Elovl1</i>                                    | -1,440460634 | 0,00014982 |
| Nascent polypeptide-associated complex alpha polypeptide                                            | <i>Naca</i>                                      | -1,440392293 | 0,0001276  |
| Ubiquitin specific peptidase 5 (isopeptidase t)                                                     | <i>Usp5</i>                                      | -1,440249535 | 0,00060572 |
| Alanyl-trna synthetase domain containing 1                                                          | <i>Aarsd1</i>                                    | -1,439994513 | 0,0013628  |
| Cyclin d3                                                                                           | <i>Ccnd3</i>                                     | -1,439294175 | 0,00036798 |
| Osteoglycin                                                                                         | <i>Ogn</i>                                       | -1,438721745 | 0,00678426 |
| Protein phosphatase 5, catalytic subunit                                                            | <i>Ppp5c</i>                                     | -1,438438323 | 0,00146407 |
| Histone aminotransferase 1                                                                          | <i>Hat1</i>                                      | -1,43796363  | 0,00143202 |
| Beta-transducin repeat containing protein                                                           | <i>Btrc</i>                                      | -1,437762912 | 0,0002572  |
| Reproductive homeobox 2a /// reproductive homeobox 2e                                               | <i>Rhox2a /// rhox2e</i>                         | -1,437514969 | 0,00938839 |
| Polymerase (rna) iii (dna directed) polypeptide h                                                   | <i>Polr3h</i>                                    | -1,436534831 | 0,00077082 |
| X-prolyl aminopeptidase (aminopeptidase p) 1, soluble                                               | <i>Xpnpep1</i>                                   | -1,436409238 | 0,00060564 |
| Serine/threonine kinase 40                                                                          | <i>Stk40</i>                                     | -1,436290304 | 0,00028524 |
| Muts homolog 2 (e. Coli)                                                                            | <i>Msh2</i>                                      | -1,436242871 | 0,00205791 |
| Maf1 homolog (s. Cerevisiae)                                                                        | <i>Maf1</i>                                      | -1,436070732 | 0,00635301 |
| Gene trap locus 3                                                                                   | <i>Gtl3</i>                                      | -1,435587451 | 0,00028029 |
| Gamma-aminobutyric acid (gaba) a receptor-associated protein-like 1                                 | <i>Gabarapl1</i>                                 | -1,435297951 | 0,0003429  |
| Trans-golgi network protein /// trans-golgi network protein 2                                       | <i>Tgoln1 /// tgoln2</i>                         | -1,435214261 | 0,00083066 |
| Propionyl coenzyme a carboxylase, beta polypeptide                                                  | <i>Pccb</i>                                      | -1,435133279 | 0,00144613 |
| Anaphase promoting complex subunit 16                                                               | <i>Anapc16</i>                                   | -1,435103264 | 0,00038396 |
| 5-hydroxymethylcytosine (hmc) binding, es cell specific                                             | <i>Hmces</i>                                     | -1,434711316 | 0,00016189 |
| C1galt1-specific chaperone 1                                                                        | <i>C1galt1c1</i>                                 | -1,434645196 | 0,0009131  |
| Centrosomal protein 152                                                                             | <i>Cep152</i>                                    | -1,434377858 | 0,0005919  |
| Insulin i                                                                                           | <i>Ins1</i>                                      | -1,434362249 | 0,00837112 |
| Mds1 and evi1 complex locus                                                                         | <i>Mecom</i>                                     | -1,43418122  | 0,00657866 |
| Relaxin/insulin-like family peptide receptor 2                                                      | <i>Rxfp2</i>                                     | -1,433761665 | 0,00132689 |
| Caspase recruitment domain family, member 10                                                        | <i>Card10</i>                                    | -1,433509402 | 0,00192881 |
| Zinc finger protein 825                                                                             | <i>Zfp825</i>                                    | -1,433254257 | 0,00708139 |
| Kv channel interacting protein 3, calsenilin                                                        | <i>Kcnip3</i>                                    | -1,433096231 | 0,00642073 |
| Nel-like 2                                                                                          | <i>Nell2</i>                                     | -1,433064811 | 0,00788425 |
| H2a histone family, member v                                                                        | <i>H2afv</i>                                     | -1,432660162 | 0,0002975  |
| Riken cdna 6430706d22 gene /// riken cdna a730008h23 gene /// holliday junction recognition protein | <i>6430706d22rik /// a730008h23rik /// hjurp</i> | -1,432263779 | 0,00600976 |

|                                                                       |                      |              |            |
|-----------------------------------------------------------------------|----------------------|--------------|------------|
| Zinc finger protein 57                                                | <i>Zfp57</i>         | -1,431940104 | 0,00317117 |
| Torsin a interacting protein 2                                        | <i>Tor1aip2</i>      | -1,431478115 | 0,00041846 |
| Riken cdna 1700001g17 gene                                            | <i>1700001g17rik</i> | -1,430913397 | 0,00112521 |
| Splicing factor 3b, subunit 6                                         | <i>Sf3b6</i>         | -1,430822398 | 0,00048344 |
| Pq loop repeat containing 1                                           | <i>Pqlc1</i>         | -1,430790829 | 0,0069415  |
| Solute carrier family 15, member 4                                    | <i>Slc15a4</i>       | -1,430585915 | 0,00085531 |
| Fun14 domain containing 2                                             | <i>Fundc2</i>        | -1,429961217 | 0,00159411 |
| Guanosine monophosphate reductase 2                                   | <i>Gmpr2</i>         | -1,429862479 | 0,00168193 |
| Cholecystokinin b receptor                                            | <i>Cckbr</i>         | -1,429704669 | 0,00174245 |
| Glutathione peroxidase 8 (putative)                                   | <i>Gpx8</i>          | -1,429516527 | 0,00011929 |
| Serum amyloid a 4                                                     | <i>Saa4</i>          | -1,428542927 | 0,00895368 |
| Fos-like antigen 1                                                    | <i>Fosl1</i>         | -1,428457836 | 0,00174543 |
| Solute carrier family 22 (organic cation transporter), member 1       | <i>Slc22a1</i>       | -1,427906414 | 0,00780281 |
| Predicted gene 9744                                                   | <i>Gm9744</i>        | -1,42768687  | 0,00335751 |
| Protein-o-mannosyltransferase 2                                       | <i>Pomt2</i>         | -1,427542345 | 0,00114301 |
| Serine (or cysteine) peptidase inhibitor, clade b, member 5           | <i>Serpinb5</i>      | -1,426969094 | 0,00160327 |
| Retinol dehydrogenase 14 (all-trans and 9-cis)                        | <i>Rdh14</i>         | -1,42677128  | 0,00294866 |
| Bardet-biedl syndrome 9 (human)                                       | <i>Bbs9</i>          | -1,426103368 | 0,0094962  |
| Agrin                                                                 | <i>Agrn</i>          | -1,425797546 | 0,00018582 |
| Naked cuticle 2 homolog (drosophila)                                  | <i>Nkd2</i>          | -1,425724685 | 0,00861009 |
| Cytochrome c oxidase assembly protein 15                              | <i>Cox15</i>         | -1,425469656 | 0,00663015 |
| Ubiquitin-associated protein 2-like                                   | <i>Ubap2l</i>        | -1,425313585 | 0,00155155 |
| Lon peptidase 2, peroxisomal                                          | <i>Lonp2</i>         | -1,425312548 | 0,00053572 |
| Erythrocyte protein band 4.1-like 3                                   | <i>Epb4.1l3</i>      | -1,424871072 | 0,00131254 |
| Dexh (asp-glu-x-his) box polypeptide 58                               | <i>Dhx58</i>         | -1,424861838 | 0,00254722 |
| Rab4b, member ras oncogene family                                     | <i>Rab4b</i>         | -1,424507436 | 0,00217361 |
| Gata binding protein 6                                                | <i>Gata6</i>         | -1,424227155 | 0,00428427 |
| Solute carrier family 37 (glycerol-3-phosphate transporter), member 3 | <i>Slc37a3</i>       | -1,424204951 | 0,00472244 |
| Coiled-coil domain containing 104                                     | <i>Ccdc104</i>       | -1,424113167 | 0,00108313 |
| Pdgfa associated protein 1                                            | <i>Pdap1</i>         | -1,423870852 | 0,0077109  |
| Lysyl oxidase-like 1                                                  | <i>Loxl1</i>         | -1,4238641   | 0,00758388 |
| Keratin associated protein 4-16                                       | <i>Krtap4-16</i>     | -1,423779574 | 0,00548837 |
| Gamma-aminobutyric acid (gaba) a receptor, subunit alpha 1            | <i>Gabra1</i>        | -1,423716319 | 0,00061052 |
| Riken cdna 2010111i01 gene                                            | <i>2010111i01rik</i> | -1,423683926 | 0,00013532 |
| Carbonic anhydrase 12                                                 | <i>Car12</i>         | -1,42349962  | 0,00291808 |
| Zinc finger protein 52                                                | <i>Zfp52</i>         | -1,423027103 | 0,00079655 |
| Caspase 2                                                             | <i>Casp2</i>         | -1,422937861 | 0,0006737  |
| Exoribonuclease 1                                                     | <i>Eri1</i>          | -1,422724769 | 0,00792987 |
| U2 small nuclear ribonucleoprotein auxiliary factor (u2af) 1          | <i>U2af1</i>         | -1,422484601 | 0,00016008 |
| Neuronal pas domain protein 1                                         | <i>Npas1</i>         | -1,422227632 | 0,0005167  |
| Visual system homeobox 2                                              | <i>Vsx2</i>          | -1,421742689 | 0,00701957 |
| Testis expressed gene 2                                               | <i>Tex2</i>          | -1,421707278 | 0,00254627 |

|                                                                                                  |                                         |              |            |
|--------------------------------------------------------------------------------------------------|-----------------------------------------|--------------|------------|
| Downstream neighbor of son                                                                       | <i>Donson</i>                           | -1,421638015 | 0,00193828 |
| Periaxin                                                                                         | <i>Prx</i>                              | -1,421590066 | 0,00609516 |
| Leucine rich repeat containing 59                                                                | <i>Lrrc59</i>                           | -1,421423008 | 0,00208389 |
| Ww domain containing transcription regulator 1                                                   | <i>Wwtr1</i>                            | -1,421193105 | 0,00089071 |
| Pc4 and sfrs1 interacting protein 1                                                              | <i>Psip1</i>                            | -1,420680525 | 0,00091555 |
| Dicarbonyl l-xylulose reductase                                                                  | <i>Dcxr</i>                             | -1,420094935 | 0,00156293 |
| G-protein signalling modulator 2 (ags3-like, c. <i>Elegans</i> )                                 | <i>Gpsm2</i>                            | -1,419998483 | 0,00053227 |
| Capicua homolog (drosophila)                                                                     | <i>Cic</i>                              | -1,418607757 | 0,00415951 |
| Uncharacterized loc102638039                                                                     | <i>Loc102638039</i>                     | -1,418286606 | 0,00427759 |
| Structural maintenance of chromosomes 4                                                          | <i>Smc4</i>                             | -1,417332793 | 0,0005919  |
| Udp-n-acetyl-alpha-d-galactosamine: polypeptide n-acetylgalactosaminyltransferase 7              | <i>Galnt7</i>                           | -1,417236902 | 0,00401187 |
| Rna polymerase ii associated protein 3                                                           | <i>Rpap3</i>                            | -1,417150659 | 0,00116435 |
| Mitogen-activated protein kinase kinase kinase 14                                                | <i>Map3k14</i>                          | -1,416899274 | 0,00101906 |
| Taste receptor, type 1, member 3                                                                 | <i>Tas1r3</i>                           | -1,416753266 | 0,00548815 |
| Adenylate cyclase activating polypeptide 1 receptor 1                                            | <i>Adcyap1r1</i>                        | -1,415649415 | 0,00975858 |
| Prp39 pre-mrna processing factor 39 homolog (yeast)                                              | <i>Prpf39</i>                           | -1,415164066 | 0,00399465 |
| Adaptor-related protein complex 2, beta 1 subunit                                                | <i>Ap2b1</i>                            | -1,414850911 | 0,00355638 |
| Sideroflexin 3                                                                                   | <i>Sfxn3</i>                            | -1,414816325 | 0,00227326 |
| Usher syndrome 2a (autosomal recessive, mild)                                                    | <i>Ush2a</i>                            | -1,414775337 | 0,00732264 |
| Family with sequence similarity 60, member a                                                     | <i>Fam60a</i>                           | -1,41460726  | 0,00097011 |
| Sec13 homolog (s. <i>Cerevisiae</i> )                                                            | <i>Sec13</i>                            | -1,414552225 | 0,00105494 |
| Apolipoprotein c-ii                                                                              | <i>Apoc2</i>                            | -1,414544017 | 0,00356246 |
| Centrosomal protein 89                                                                           | <i>Cep89</i>                            | -1,414446149 | 0,00785734 |
| Uridine-cytidine kinase 2                                                                        | <i>Uck2</i>                             | -1,414440535 | 0,0002593  |
| Trinucleotide repeat containing 6b                                                               | <i>Tnrc6b</i>                           | -1,414360989 | 0,00145685 |
| Riken cdna 4930470p17 gene                                                                       | <i>4930470p17rik</i>                    | -1,414311327 | 0,00333492 |
| Zinc finger protein pseudogene                                                                   | <i>Loc171588</i>                        | -1,41418044  | 0,00466856 |
| Junction plakoglobin                                                                             | <i>Jup</i>                              | -1,414011283 | 0,00116435 |
| Efr3 homolog a (s. <i>Cerevisiae</i> )                                                           | <i>Efr3a</i>                            | -1,413929102 | 0,00218459 |
| Nitric oxide synthase 1, neuronal                                                                | <i>Nos1</i>                             | -1,413322632 | 0,00750638 |
| Trna methyltransferase 11-2                                                                      | <i>Trmt112</i>                          | -1,413318327 | 0,00432019 |
| Wd repeat domain 62                                                                              | <i>Wdr62</i>                            | -1,413288809 | 0,00254837 |
| Catenin, beta like 1                                                                             | <i>Ctnnbl1</i>                          | -1,413250147 | 0,00028096 |
| Udp-glucose pyrophosphorylase 2                                                                  | <i>Ugp2</i>                             | -1,413226556 | 0,00117829 |
| Cytochrome c oxidase assembly protein 14 ///<br>cytochrome c oxidase assembly protein cox14-like | <i>Cox14 ///</i><br><i>loc101055854</i> | -1,412926669 | 0,00083667 |
| Protein kinase c, zeta                                                                           | <i>Prkcz</i>                            | -1,412631401 | 0,00879646 |
| Cytoplasmic fmr1 interacting protein 1                                                           | <i>Cyfiip1</i>                          | -1,41260184  | 0,00155408 |
| Cut-like homeobox 1                                                                              | <i>Cux1</i>                             | -1,412573298 | 0,00508845 |
| Phosphatidylglycerophosphate synthase 1                                                          | <i>Pgs1</i>                             | -1,412540445 | 0,00044604 |
| Family with sequence similarity 160, member b1                                                   | <i>Fam160b1</i>                         | -1,412322949 | 0,0023616  |
| Integrator complex subunit 1                                                                     | <i>Ints1</i>                            | -1,41231392  | 0,00254308 |
| Rap2c, member of ras oncogene family                                                             | <i>Rap2c</i>                            | -1,411975917 | 0,00493644 |

|                                                                                                   |                                 |              |            |
|---------------------------------------------------------------------------------------------------|---------------------------------|--------------|------------|
| Syntaxin 2                                                                                        | <i>Stx2</i>                     | -1,411700642 | 0,00050512 |
| Selenoprotein k                                                                                   | <i>Selk</i>                     | -1,411621088 | 0,00047172 |
| Collagen, type ii, alpha 1                                                                        | <i>Col2a1</i>                   | -1,411592006 | 0,00313677 |
| Ptc7 protein phosphatase homolog (s. Cerevisiae)                                                  | <i>Pptc7</i>                    | -1,41100033  | 0,00050091 |
| N-acetylneuraminic acid synthase (sialic acid synthase)                                           | <i>Nans</i>                     | -1,410945311 | 0,00328333 |
| Claudin 18                                                                                        | <i>Cldn18</i>                   | -1,410738807 | 0,00624337 |
| Processing of precursor 5, ribonuclease p/mrp family (s. Cerevisiae)                              | <i>Pop5</i>                     | -1,410663779 | 0,00039022 |
| Sphingosine-1-phosphate receptor 3                                                                | <i>S1pr3</i>                    | -1,410297338 | 0,00157814 |
| Was protein family, member 1                                                                      | <i>Wasf1</i>                    | -1,410236422 | 0,00154224 |
| Glial cells missing homolog 1 (drosophila)                                                        | <i>Gcm1</i>                     | -1,409975161 | 0,00528704 |
| Hmg box domain containing 4                                                                       | <i>Hmgxb4</i>                   | -1,409810799 | 0,00098027 |
| Proteasome (prosome, macropain) subunit, beta type 7 pseudogene                                   | <i>Gm6787</i>                   | -1,409562599 | 0,00279933 |
| Human immunodeficiency virus type i enhancer binding protein 3                                    | <i>Hivep3</i>                   | -1,409338234 | 0,00131686 |
| Acetyl-coenzyme a acyltransferase 2 (mitochondrial 3-oxoacyl-coenzyme a thiolase)                 | <i>Acaa2</i>                    | -1,408387819 | 0,00017572 |
| St3 beta-galactoside alpha-2,3-sialyltransferase 3                                                | <i>St3gal3</i>                  | -1,40808061  | 0,00070975 |
| Sjogren's syndrome nuclear autoantigen 1                                                          | <i>Ssna1</i>                    | -1,407829656 | 0,0001862  |
| Myosin, light polypeptide 3                                                                       | <i>Myl3</i>                     | -1,407822082 | 0,00608678 |
| Protein tyrosine phosphatase-like a domain containing 2                                           | <i>Ptplad2</i>                  | -1,407747147 | 0,00173574 |
| Riken cDNA 1810037i17 gene /// predicted gene 2036                                                | <i>1810037i17rik /// gm2036</i> | -1,407712715 | 0,001242   |
| Ring finger and chy zinc finger domain containing 1                                               | <i>Rchy1</i>                    | -1,407572533 | 0,00321777 |
| Nuclear distribution gene e homolog 1 (a nidulans)                                                | <i>Nde1</i>                     | -1,407549405 | 0,00074449 |
| Thioredoxin-like 1                                                                                | <i>Txn1</i>                     | -1,407061709 | 0,00112558 |
| Methyl-cpg binding domain protein 4                                                               | <i>Mbd4</i>                     | -1,406888946 | 0,0074602  |
| Mechanistic target of rapamycin (serine/threonine kinase)                                         | <i>Mtor</i>                     | -1,406851576 | 0,00367953 |
| Kinesin family member 16b                                                                         | <i>Kif16b</i>                   | -1,406552306 | 0,00806649 |
| Swi/snf related, matrix associated, actin dependent regulator of chromatin, subfamily b, member 1 | <i>Smrnb1</i>                   | -1,406529438 | 0,00130084 |
| Histone cluster 1, h3d                                                                            | <i>Hist1h3d</i>                 | -1,40642204  | 0,00154945 |
| Sin3 associated polypeptide                                                                       | <i>Sap30</i>                    | -1,406094071 | 0,00129091 |
| Predicted gene, 21540 /// transmembrane emp24 domain trafficking protein 2                        | <i>Gm21540 /// tmed2</i>        | -1,406059977 | 0,00755071 |
| Tetratricopeptide repeat domain 4                                                                 | <i>Ttc4</i>                     | -1,405993744 | 0,00178414 |
| Zinc finger and btb domain containing 16                                                          | <i>Zbtb16</i>                   | -1,404775557 | 0,00596549 |
| Receptor (calcitonin) activity modifying protein 2 /// vacuolar protein sorting 25 (yeast)        | <i>Ramp2 /// vps25</i>          | -1,40475293  | 0,00063958 |
| Cytochrome p450, family 21, subfamily a, polypeptide 1                                            | <i>Cyp21a1</i>                  | -1,404696475 | 0,00176856 |
| Arylacetamide deacetylase (esterase)                                                              | <i>Aadac</i>                    | -1,404420628 | 0,00960645 |
| Eph receptor b3                                                                                   | <i>Ephb3</i>                    | -1,403955651 | 0,00029525 |
| Unc-5 homolog b (c. Elegans)                                                                      | <i>Unc5b</i>                    | -1,403818479 | 0,0006562  |
| Leucine-rich repeats and immunoglobulin-like domains 1                                            | <i>Lrig1</i>                    | -1,403747    | 0,00932031 |



|                                                                                                                                                                                                                                           |                                   |              |            |
|-------------------------------------------------------------------------------------------------------------------------------------------------------------------------------------------------------------------------------------------|-----------------------------------|--------------|------------|
| Methylphosphate capping enzyme                                                                                                                                                                                                            | <i>Mepce</i>                      | -1,403682196 | 0,00265057 |
| Max-like protein x                                                                                                                                                                                                                        | <i>Max</i>                        | -1,403667452 | 0,00047172 |
| Adp-ribosylation factor-like 6 interacting protein 4                                                                                                                                                                                      | <i>Arl6ip4</i>                    | -1,40364862  | 0,00066524 |
| Pith (c-terminal proteasome-interacting domain of thioredoxin-like) domain containing 1                                                                                                                                                   | <i>Pithd1</i>                     | -1,403619023 | 0,00043441 |
| Corticotropin releasing hormone receptor 1                                                                                                                                                                                                | <i>Crhr1</i>                      | -1,403500509 | 0,00936858 |
| Cd2 antigen                                                                                                                                                                                                                               | <i>Cd2</i>                        | -1,403455466 | 0,00605284 |
| Potassium voltage-gated channel, shaker-related subfamily, beta member 3                                                                                                                                                                  | <i>Kcnab3</i>                     | -1,403024083 | 0,00038659 |
| Eukaryotic translation initiation factor 2b, subunit 4 delta                                                                                                                                                                              | <i>Eif2b4</i>                     | -1,402820041 | 0,00172073 |
| Guanine nucleotide binding protein (g protein), gamma 11                                                                                                                                                                                  | <i>Gng11</i>                      | -1,402669206 | 0,00321914 |
| Sorting nexin 12                                                                                                                                                                                                                          | <i>Snx12</i>                      | -1,402597298 | 0,00150958 |
| Inducible t cell co-stimulator                                                                                                                                                                                                            | <i>Icos</i>                       | -1,402345049 | 0,0081553  |
| Guanosine monophosphate reductase                                                                                                                                                                                                         | <i>Gmpr</i>                       | -1,402312443 | 0,00445835 |
| O-6-methylguanine-dna methyltransferase                                                                                                                                                                                                   | <i>Mgmt</i>                       | -1,402159418 | 0,00733738 |
| Transmembrane protein 87a                                                                                                                                                                                                                 | <i>Tmem87a</i>                    | -1,40211044  | 0,00448224 |
| Ufm1-specific peptidase 2                                                                                                                                                                                                                 | <i>Ufsp2</i>                      | -1,401896617 | 0,00031242 |
| Myosin, light polypeptide 6, alkali, smooth muscle and non-muscle pseudogene /// myosin light polypeptide 6 alkali smooth muscle and non-muscle protein, pseudogene /// myosin, light polypeptide 6, alkali, smooth muscle and non-muscle | <i>Gm5526 /// gm8894 /// myl6</i> | -1,401689699 | 0,00060056 |
| Estrogen receptor-binding fragment-associated gene 9                                                                                                                                                                                      | <i>Ebag9</i>                      | -1,40162369  | 0,00461123 |
| Polymerase (rna) ii (dna directed) polypeptide g                                                                                                                                                                                          | <i>Polr2g</i>                     | -1,401555638 | 0,00085105 |
| Lysosomal-associated protein transmembrane 4a                                                                                                                                                                                             | <i>Laptm4a</i>                    | -1,401357116 | 0,0007071  |
| Carbamoyl-phosphate synthetase 2, aspartate transcarbamylase, and dihydroorotase                                                                                                                                                          | <i>Cad</i>                        | -1,400926837 | 0,00101601 |
| Wingless-type mmtv integration site family, member 2                                                                                                                                                                                      | <i>Wnt2</i>                       | -1,400924495 | 0,00232568 |
| Stathmin-like 3                                                                                                                                                                                                                           | <i>Stmn3</i>                      | -1,400916237 | 0,00391427 |
| Von willebrand factor a domain containing 1                                                                                                                                                                                               | <i>Vwa1</i>                       | -1,399518124 | 0,00731997 |
| Potassium voltage gated channel, shab-related subfamily, member 1 /// protein kinase c and casein kinase substrate in neurons 2                                                                                                           | <i>Kcnb1 /// pacsin2</i>          | -1,399278253 | 0,00040671 |
| Anaplastic lymphoma kinase                                                                                                                                                                                                                | <i>Alk</i>                        | -1,39920703  | 0,00493499 |
| Solute carrier family 25 (mitochondrial carnitine/acylcarnitine translocase), member 20                                                                                                                                                   | <i>Slc25a20</i>                   | -1,399148241 | 0,00322028 |
| Ddb1 and cul4 associated factor 15                                                                                                                                                                                                        | <i>Dcaf15</i>                     | -1,398900916 | 0,00114845 |
| Malignant t cell amplified sequence 1                                                                                                                                                                                                     | <i>Mcts1</i>                      | -1,398891735 | 0,00023259 |
| Acetyl-coenzyme a carboxylase alpha                                                                                                                                                                                                       | <i>Acaca</i>                      | -1,39889085  | 0,00125197 |
| Testis specific protein-y encoded, pseudogene                                                                                                                                                                                             | <i>Tspy-ps</i>                    | -1,398782713 | 0,00040232 |
| Pyrophosphatase (inorganic) 1                                                                                                                                                                                                             | <i>Ppa1</i>                       | -1,398767726 | 0,00021699 |
| Myotubularin related protein 14                                                                                                                                                                                                           | <i>Mtmr14</i>                     | -1,398687684 | 0,00210903 |
| Interleukin 31 receptor a                                                                                                                                                                                                                 | <i>Il31ra</i>                     | -1,398573375 | 0,00760304 |
| Mitochondrial inner membrane organizing system 1                                                                                                                                                                                          | <i>Minos1</i>                     | -1,398470233 | 0,00077578 |
| N(alpha)-acetyltransferase 10, nata catalytic subunit                                                                                                                                                                                     | <i>Naa10</i>                      | -1,398455744 | 0,00117488 |
| Solute carrier family 4 (anion exchanger), member 2                                                                                                                                                                                       | <i>Slc4a2</i>                     | -1,398148184 | 0,00130583 |

|                                                                                 |                        |              |            |
|---------------------------------------------------------------------------------|------------------------|--------------|------------|
| Microrna 425                                                                    | <i>Mir425</i>          | -1,397898295 | 0,00793964 |
| Predicted gene 6910 /// ring1 and yy1 binding protein                           | <i>Gm6910 /// rybp</i> | -1,397780643 | 0,00164429 |
| Nuclear distribution gene c homolog (aspergillus)                               | <i>Nudc</i>            | -1,397383453 | 0,0005355  |
| Vimentin                                                                        | <i>Vim</i>             | -1,397144777 | 0,00019825 |
| Interleukin 20                                                                  | <i>Il20</i>            | -1,396901642 | 0,00570311 |
| Origin recognition complex, subunit 3                                           | <i>Orc3</i>            | -1,396447149 | 0,0004975  |
| Phosphatidylinositol transfer protein, alpha                                    | <i>Pitpna</i>          | -1,396134088 | 0,00249177 |
| Coiled-coil domain containing 166                                               | <i>Ccdc166</i>         | -1,396039709 | 0,00582168 |
| Deoxyuridine triphosphatase                                                     | <i>Dut</i>             | -1,394941667 | 0,00050986 |
| Metastasis-associated gene family, member 2                                     | <i>Mta2</i>            | -1,394047357 | 0,00185315 |
| Formin-like 1                                                                   | <i>Fmnl1</i>           | -1,393860356 | 0,00043277 |
| Tropomyosin 3, gamma                                                            | <i>Tpm3</i>            | -1,393822611 | 0,00119469 |
| Negative elongation factor complex member a, whsc2                              | <i>Nelfa</i>           | -1,393765058 | 0,00021087 |
| Cadherin 5                                                                      | <i>Cdh5</i>            | -1,393739972 | 0,00376514 |
| Serrate rna effector molecule homolog (arabidopsis)                             | <i>Srrt</i>            | -1,393728656 | 0,00310895 |
| Glutamate-cysteine ligase, modifier subunit                                     | <i>Gclm</i>            | -1,393660813 | 0,00052878 |
| Ribonuclease p/mrp 30 subunit                                                   | <i>Rpp30</i>           | -1,392486926 | 0,00218106 |
| Proteasome (prosome, macropain) assembly chaperone 3                            | <i>Psmg3</i>           | -1,390144827 | 0,0012794  |
| Dual adaptor for phosphotyrosine and 3-phosphoinositides 1                      | <i>Dapp1</i>           | -1,390138423 | 0,00188506 |
| Myosin, light polypeptide 4                                                     | <i>Myl4</i>            | -1,389675308 | 0,00934565 |
| Ataxia, cerebellar, cayman type homolog (human)                                 | <i>Atcay</i>           | -1,389462625 | 0,00822207 |
| Protein kinase c, epsilon                                                       | <i>Prkce</i>           | -1,389400243 | 0,00304291 |
| Zinc finger, c3hc type 1                                                        | <i>Zc3hc1</i>          | -1,388828665 | 0,00204632 |
| Taspase, threonine aspartase 1                                                  | <i>Tasp1</i>           | -1,388412097 | 0,00187073 |
| Sema domain, transmembrane domain (tm), and cytoplasmic domain, (semaphorin) 6b | <i>Sema6b</i>          | -1,38834878  | 0,0014548  |
| Sh3-domain kinase binding protein 1                                             | <i>Sh3kbp1</i>         | -1,388321334 | 0,0008106  |
| Gnas (guanine nucleotide binding protein, alpha stimulating) complex locus      | <i>Gnas</i>            | -1,387660741 | 0,00451848 |
| Stabilin 1                                                                      | <i>Stab1</i>           | -1,387437966 | 0,00196846 |
| Transgelin 2                                                                    | <i>Tagln2</i>          | -1,387129419 | 0,00023515 |
| B cell translocation gene 1, anti-proliferative                                 | <i>Btg1</i>            | -1,386941978 | 0,00338353 |
| Capping protein (actin filament), gelsolin-like                                 | <i>Capg</i>            | -1,386791913 | 0,00042556 |
| Tspy-like 4                                                                     | <i>Tspyl4</i>          | -1,386622169 | 0,00629125 |
| E1a binding protein p400                                                        | <i>Ep400</i>           | -1,386570443 | 0,00198703 |
| Egl-9 family hypoxia-inducible factor 1                                         | <i>Egln1</i>           | -1,386502594 | 0,0011819  |
| Eps8-like 2                                                                     | <i>Eps8l2</i>          | -1,38641667  | 0,00261112 |
| Anaphase promoting complex subunit 7                                            | <i>Anapc7</i>          | -1,386130559 | 0,00052462 |
| Plastin 3 (t-isoform)                                                           | <i>Pls3</i>            | -1,385811758 | 0,00140306 |
| Phosphofructokinase, muscle                                                     | <i>Pfkm</i>            | -1,38576203  | 0,0002138  |
| Family with sequence similarity 207, member a                                   | <i>Fam207a</i>         | -1,385431402 | 0,002135   |
| Mitogen-activated protein kinase kinase 2                                       | <i>Map2k2</i>          | -1,385180636 | 0,00243169 |
| Nuclear receptor subfamily 2, group e, member 3                                 | <i>Nr2e3</i>           | -1,384756314 | 0,00771566 |

|                                                                                              |                      |              |            |
|----------------------------------------------------------------------------------------------|----------------------|--------------|------------|
| Occludin/ell domain containing 1                                                             | <i>Ocel1</i>         | -1,384439558 | 0,00183547 |
| Heme binding protein 1                                                                       | <i>Hebp1</i>         | -1,384265794 | 0,00072165 |
| Cue domain containing 2                                                                      | <i>Cuedc2</i>        | -1,383928688 | 0,00932043 |
| Coiled-coil domain containing 71 like                                                        | <i>Ccdc71l</i>       | -1,383905923 | 0,00395455 |
| Oxysterol binding protein                                                                    | <i>Osbp</i>          | -1,383781957 | 0,00028524 |
| Eukaryotic translation initiation factor 4h                                                  | <i>Eif4h</i>         | -1,382877059 | 0,00049594 |
| Phospholipase d2                                                                             | <i>Pld2</i>          | -1,382321813 | 0,00227744 |
| Tbc1 domain family, member 22a                                                               | <i>Tbc1d22a</i>      | -1,382254099 | 0,00058758 |
| Tyrosine 3-monooxygenase/tryptophan 5-monooxygenase activation protein, theta polypeptide    | <i>Ywhaq</i>         | -1,38201679  | 0,0012441  |
| N(alpha)-acetyltransferase 35, natc auxiliary subunit                                        | <i>Naa35</i>         | -1,381718882 | 0,00266959 |
| Wilms tumour 1-associating protein                                                           | <i>Wtap</i>          | -1,381586545 | 0,0023667  |
| Ectonucleoside triphosphate diphosphohydrolase 5                                             | <i>Entpd5</i>        | -1,381257405 | 0,00283548 |
| C-terminal binding protein 1                                                                 | <i>Ctbp1</i>         | -1,380826331 | 0,00026649 |
| Fidgetin-like 1                                                                              | <i>Fignl1</i>        | -1,380744098 | 0,00822663 |
| Mitochondrial ribosomal protein l54                                                          | <i>Mrpl54</i>        | -1,380707184 | 0,00191521 |
| Rho-associated coiled-coil containing protein kinase 2                                       | <i>Rock2</i>         | -1,380350107 | 0,00031703 |
| Ligand dependent nuclear receptor corepressor                                                | <i>Lcor</i>          | -1,37971778  | 0,00662711 |
| Purinergic receptor p2y, g-protein coupled 2                                                 | <i>P2ry2</i>         | -1,379706199 | 0,00186209 |
| Pas domain containing serine/threonine kinase                                                | <i>Pask</i>          | -1,379703024 | 0,00101541 |
| Signal-induced proliferation-associated 1 like 2                                             | <i>Sipa1l2</i>       | -1,379683231 | 0,00278284 |
| Coiled-coil-helix-coiled-coil-helix domain containing 5                                      | <i>Chchd5</i>        | -1,379411029 | 0,00312244 |
| Det1 and ddb1 associated 1                                                                   | <i>Dda1</i>          | -1,378983944 | 0,00275905 |
| Mus musculus, clone image:4481448, mrna.                                                     | <i>Bc049805</i>      | -1,37863624  | 0,00183483 |
| Aldehyde oxidase 3                                                                           | <i>Aox3</i>          | -1,378587649 | 0,00075735 |
| Solute carrier family 25 (mitochondrial carrier, adenine nucleotide translocator), member 13 | <i>Slc25a13</i>      | -1,378522183 | 0,00668008 |
| Solute carrier family 2 (facilitated glucose transporter), member 4                          | <i>Slc2a4</i>        | -1,378303897 | 0,00161234 |
| Cullin associated and neddylation disassociated 1                                            | <i>Cand1</i>         | -1,377641768 | 0,00123855 |
| Translocase of outer mitochondrial membrane 20 homolog (yeast)                               | <i>Tomm20</i>        | -1,377552724 | 0,00381753 |
| Proteasome (prosome, macropain) subunit, alpha type 6                                        | <i>Psmalpha6</i>     | -1,376961641 | 0,00088383 |
| Adp-ribosylation factor-like 4a                                                              | <i>Arl4a</i>         | -1,376801597 | 0,00185038 |
| Was protein family, member 3                                                                 | <i>Wasf3</i>         | -1,376294425 | 0,00067901 |
| Cerberus 1 homolog (xenopus laevis)                                                          | <i>Cer1</i>          | -1,376104146 | 0,00356984 |
| Zyxin                                                                                        | <i>Zyx</i>           | -1,375870542 | 0,0008495  |
| Autophagy related 5                                                                          | <i>Atg5</i>          | -1,375791073 | 0,00281405 |
| Transmembrane bax inhibitor motif containing 4                                               | <i>Tmbim4</i>        | -1,375780796 | 0,0019757  |
| Kelch-like 42                                                                                | <i>Klhl42</i>        | -1,375730698 | 0,0037143  |
| Tgf-beta activated kinase 1/map3k7 binding protein 1                                         | <i>Tab1</i>          | -1,37569144  | 0,00466722 |
| Riken cdna 1110035h17 gene                                                                   | <i>1110035h17rik</i> | -1,375195894 | 0,00221395 |
| N-ethylmaleimide sensitive fusion protein                                                    | <i>Nsf</i>           | -1,374714366 | 0,00227326 |

|                                                                                                                                                            |                                                             |              |            |
|------------------------------------------------------------------------------------------------------------------------------------------------------------|-------------------------------------------------------------|--------------|------------|
| Syntaxin 7                                                                                                                                                 | <i>Stx7</i>                                                 | -1,374630696 | 0,00083667 |
| Pancreatic polypeptide                                                                                                                                     | <i>Ppy</i>                                                  | -1,37437412  | 0,00327323 |
| Aldo-keto reductase family 1, member a1 (aldehyde reductase)                                                                                               | <i>Akr1a1</i>                                               | -1,374335317 | 0,00020409 |
| Putative homeodomain transcription factor 1                                                                                                                | <i>Phtf1</i>                                                | -1,374268828 | 0,00053692 |
| Harvey rat sarcoma virus oncogene                                                                                                                          | <i>Hras</i>                                                 | -1,373887735 | 0,0018961  |
| Bromodomain containing 2                                                                                                                                   | <i>Brd2</i>                                                 | -1,373778108 | 0,00301651 |
| Potassium large conductance calcium-activated channel, subfamily m, beta member 4                                                                          | <i>Kcnmb4</i>                                               | -1,373253666 | 0,00128167 |
| Aryl hydrocarbon receptor-interacting protein-like 1                                                                                                       | <i>Aipl1</i>                                                | -1,373199876 | 0,00299908 |
| Serine hydroxymethyltransferase 1 (soluble)                                                                                                                | <i>Shmt1</i>                                                | -1,372844624 | 0,0004596  |
| Acyl-coa desaturase 1-like /// stearyl-coenzyme a desaturase 3                                                                                             | <i>Loc102642893</i> /// <i>scd3</i>                         | -1,372627204 | 0,00197681 |
| Uncharacterized loc269472                                                                                                                                  | <i>Loc269472</i>                                            | -1,372500818 | 0,00757049 |
| Muts homolog 6 (e. Coli)                                                                                                                                   | <i>Msh6</i>                                                 | -1,372494583 | 0,00105687 |
| Profilin 3                                                                                                                                                 | <i>Pfn3</i>                                                 | -1,372310721 | 0,00666557 |
| Urocanase domain containing 1                                                                                                                              | <i>Uroc1</i>                                                | -1,371963397 | 0,00400303 |
| B lymphoid kinase                                                                                                                                          | <i>Blk</i>                                                  | -1,371519576 | 0,00552804 |
| Aquaporin 7                                                                                                                                                | <i>Aqp7</i>                                                 | -1,371385454 | 0,0034639  |
| Malic enzyme 2, nad(+)-dependent, mitochondrial                                                                                                            | <i>Me2</i>                                                  | -1,371349233 | 0,00068911 |
| Staphylococcal nuclease and tudor domain containing 1                                                                                                      | <i>Snd1</i>                                                 | -1,370999952 | 0,00028524 |
| Mitochondrial ribosomal protein l18                                                                                                                        | <i>Mrpl18</i>                                               | -1,370926189 | 0,00668008 |
| Nadh dehydrogenase (ubiquinone) 1 alpha subcomplex, 9                                                                                                      | <i>Ndufa9</i>                                               | -1,370595456 | 0,00048627 |
| Kelch domain containing 2                                                                                                                                  | <i>Klhdc2</i>                                               | -1,370540791 | 0,00316584 |
| At rich interactive domain 3a (bright-like)                                                                                                                | <i>Arid3a</i>                                               | -1,370536137 | 0,00453944 |
| Nad(p)h dehydrogenase, quinone 2                                                                                                                           | <i>Nqo2</i>                                                 | -1,370372854 | 0,00141645 |
| Anti-silencing function 1a histone chaperone                                                                                                               | <i>Asf1a</i>                                                | -1,370240291 | 0,00112702 |
| S-adenosylhomocysteine hydrolase                                                                                                                           | <i>Ahcy</i>                                                 | -1,370086587 | 0,00044734 |
| Rhomboid domain containing 3                                                                                                                               | <i>Rhbdd3</i>                                               | -1,369297091 | 0,00877622 |
| Non-smc element 2 homolog (mms21, s. Cerevisiae)                                                                                                           | <i>Nsmce2</i>                                               | -1,369234694 | 0,00073086 |
| Protein phosphatase 2, regulatory subunit b', gamma                                                                                                        | <i>Ppp2r5c</i>                                              | -1,368562592 | 0,00052085 |
| Tumor necrosis factor (ligand) superfamily, member 12 /// tnfsf12-tnfsf13 readthrough transcript /// tumor necrosis factor (ligand) superfamily, member 13 | <i>Tnfsf12</i> /// <i>tnfsf12tnfsf13</i> /// <i>tnfsf13</i> | -1,368156136 | 0,00367282 |
| Williams-beuren syndrome chromosome region 16 homolog (human)                                                                                              | <i>Wbscr16</i>                                              | -1,368112077 | 0,00109595 |
| Kinesin family member 4                                                                                                                                    | <i>Kif4</i>                                                 | -1,368089472 | 0,00114747 |
| Cytochrome p450, family 2, subfamily d, polypeptide 22                                                                                                     | <i>Cyp2d22</i>                                              | -1,368062453 | 0,00186002 |
| Disabled 1                                                                                                                                                 | <i>Dab1</i>                                                 | -1,36798637  | 0,00714958 |
| Trna methyltransferase 44                                                                                                                                  | <i>Trmt44</i>                                               | -1,367982652 | 0,00122165 |
| Spry domain containing 3                                                                                                                                   | <i>Spryd3</i>                                               | -1,3679604   | 0,00273151 |
| Src family associated phosphoprotein 2                                                                                                                     | <i>Skap2</i>                                                | -1,367707773 | 0,00092418 |
| S100 calcium binding protein a9 (calgranulin b)                                                                                                            | <i>S100a9</i>                                               | -1,367463809 | 0,00394251 |
| Haloacid dehalogenase-like hydrolase domain containing 1a                                                                                                  | <i>Hdhd1a</i>                                               | -1,367380264 | 0,00350555 |
| Nitrogen permease regulator-like 3                                                                                                                         | <i>Nprl3</i>                                                | -1,367169003 | 0,00287968 |

|                                                                                             |                        |              |            |
|---------------------------------------------------------------------------------------------|------------------------|--------------|------------|
| Centromere protein q                                                                        | <i>Cenpq</i>           | -1,367113874 | 0,00451259 |
| Mdm2, transformed 3t3 cell double minute p53 binding protein                                | <i>Mtbp</i>            | -1,366465392 | 0,00033525 |
| Nadh dehydrogenase (ubiquinone) 1 beta subcomplex, 9                                        | <i>Ndufb9</i>          | -1,366318445 | 0,00052223 |
| Angiogenin, ribonuclease, mase a family, 5                                                  | <i>Ang</i>             | -1,36585303  | 0,00460465 |
| Ferm domain containing 5                                                                    | <i>Frmd5</i>           | -1,365693226 | 0,00257224 |
| Nsfl1 (p97) cofactor (p47)                                                                  | <i>Nsfl1c</i>          | -1,365397537 | 0,00104349 |
| X-ray repair complementing defective repair in chinese hamster cells 6                      | <i>Xrcc6</i>           | -1,365175049 | 0,00059673 |
| D4, zinc and double phd fingers, family 3                                                   | <i>Dpf3</i>            | -1,36505584  | 0,00581312 |
| Riken cdna 1700001c19 gene                                                                  | <i>1700001c19rik</i>   | -1,364709581 | 0,00843572 |
| Per-pentamer repeat gene                                                                    | <i>Ppnr</i>            | -1,364584501 | 0,00203065 |
| Ankyrin repeat domain 27 (vps9 domain)                                                      | <i>Ankrd27</i>         | -1,364418873 | 0,00340259 |
| Chemokine (c-x3-c motif) ligand 1                                                           | <i>Cx3cl1</i>          | -1,36411256  | 0,0008714  |
| Heat shock protein 8                                                                        | <i>Hspa8</i>           | -1,363366569 | 0,00214279 |
| Fibromodulin                                                                                | <i>Fmod</i>            | -1,363312304 | 0,00930115 |
| Copine i                                                                                    | <i>Cpne1</i>           | -1,363240841 | 0,00053596 |
| Feminization 1 homolog a (c. Elegans)                                                       | <i>Fem1a</i>           | -1,362619839 | 0,00186702 |
| Myotubularin related protein 4                                                              | <i>Mtmr4</i>           | -1,3625164   | 0,00118256 |
| G protein-regulated inducer of neurite outgrowth 1                                          | <i>Gprin1</i>          | -1,362500909 | 0,0032648  |
| Kh domain containing, rna binding, signal transduction associated 1                         | <i>Khdrbs1</i>         | -1,362414615 | 0,00992651 |
| Vesicle transport through interaction with t-snares 1a                                      | <i>Vti1a</i>           | -1,362295714 | 0,00676254 |
| Contactin 2                                                                                 | <i>Cntn2</i>           | -1,36208294  | 0,00808303 |
| Dead (asp-glu-ala-asp) box polypeptide 47                                                   | <i>Ddx47</i>           | -1,361799028 | 0,00117656 |
| Dead (asp-glu-ala-asp) box polypeptide 6                                                    | <i>Ddx6</i>            | -1,361721514 | 0,00049753 |
| Daz interacting protein 1                                                                   | <i>Dzip1</i>           | -1,361653231 | 0,00330358 |
| Rhotekin                                                                                    | <i>Rtkn</i>            | -1,361424263 | 0,00325122 |
| Predicted gene 4887 /// twinfilin, actin-binding protein, homolog 1 (drosophila)            | <i>Gm4887 /// twf1</i> | -1,361422461 | 0,00989754 |
| Integrator complex subunit 6                                                                | <i>Ints6</i>           | -1,361296315 | 0,00070156 |
| Formin binding protein 4                                                                    | <i>Fbnp4</i>           | -1,361204015 | 0,00248865 |
| Diaphanous homolog 1 (drosophila)                                                           | <i>Diap1</i>           | -1,360825592 | 0,00328912 |
| Family with sequence similarity 126, member a                                               | <i>Fam126a</i>         | -1,360732672 | 0,00859842 |
| Epidermal growth factor receptor pathway substrate 15                                       | <i>Eps15</i>           | -1,360394115 | 0,00201559 |
| Family with sequence similarity 96, member b                                                | <i>Fam96b</i>          | -1,360200936 | 0,00168846 |
| Ring finger protein 181                                                                     | <i>Rnf181</i>          | -1,359993921 | 0,00084314 |
| Quinoid dihydropteridine reductase                                                          | <i>Qdpr</i>            | -1,359959596 | 0,00505884 |
| Solute carrier family 25 (mitochondrial carrier, adenine nucleotide translocator), member 4 | <i>Slc25a4</i>         | -1,35992608  | 0,00595585 |
| Artemin                                                                                     | <i>Artn</i>            | -1,3595465   | 0,00421767 |
| Mitochondrial calcium uptake 1                                                              | <i>Micu1</i>           | -1,35892801  | 0,00169184 |
| Rab24, member ras oncogene family                                                           | <i>Rab24</i>           | -1,358902221 | 0,00208872 |
| Sry (sex determining region y)-box 21                                                       | <i>Sox21</i>           | -1,358791181 | 0,00588691 |
| Scm-like with four mbt domains 1                                                            | <i>Sfmbt1</i>          | -1,358735954 | 0,003192   |

|                                                                                |                      |              |            |
|--------------------------------------------------------------------------------|----------------------|--------------|------------|
| Gs homeobox 1                                                                  | <i>Gsx1</i>          | -1,358335483 | 0,00682703 |
| Rmi1, recq mediated genome instability 1, homolog (s. Cerevisiae)              | <i>Rmi1</i>          | -1,357453543 | 0,00061873 |
| Coiled-coil domain containing 109b                                             | <i>Ccdc109b</i>      | -1,357229665 | 0,00418989 |
| Negative elongation factor complex member e, rdbp                              | <i>Nelfe</i>         | -1,356978969 | 0,00437069 |
| Mitochondrial ribosomal protein s15                                            | <i>Mrps15</i>        | -1,356649837 | 0,00190734 |
| Riken cdna 2610001j05 gene                                                     | <i>2610001j05rik</i> | -1,356498285 | 0,00046337 |
| Glutamate receptor, ionotropic, nmda3b                                         | <i>Grin3b</i>        | -1,356487965 | 0,00732505 |
| Enhancer of zeste homolog 1 (drosophila)                                       | <i>Ezh1</i>          | -1,356234111 | 0,00315256 |
| N(alpha)-acetyltransferase 20, natb catalytic subunit                          | <i>Naa20</i>         | -1,356193361 | 0,00222406 |
| Flavin containing monooxygenase 4                                              | <i>Fmo4</i>          | -1,355992568 | 0,00819509 |
| Homeobox a4                                                                    | <i>Hoxa4</i>         | -1,355685398 | 0,00944415 |
| Small proline-rich protein 3                                                   | <i>Sprp3</i>         | -1,355524989 | 0,0031207  |
| Smg-5 homolog, nonsense mediated mrna decay factor (c. Elegans)                | <i>Smg5</i>          | -1,354176018 | 0,00270542 |
| Dnaj (hsp40) homolog, subfamily c, member 11                                   | <i>Dnajc11</i>       | -1,354109885 | 0,00129693 |
| Erythrocyte protein band 4.1-like 2                                            | <i>Epb4.1l2</i>      | -1,353771388 | 0,00089192 |
| Mitogen-activated protein kinase 9                                             | <i>Mapk9</i>         | -1,352906398 | 0,00079041 |
| Dnaj (hsp40) homolog, subfamily c, member 8                                    | <i>Dnajc8</i>        | -1,352537644 | 0,00192507 |
| Myeloblastosis oncogene                                                        | <i>Myb</i>           | -1,352382889 | 0,00837838 |
| Tubulin, gamma 1                                                               | <i>Tubg1</i>         | -1,351257976 | 0,00329181 |
| Lysine (k)-specific methyltransferase 2e                                       | <i>Kmt2e</i>         | -1,351234876 | 0,00205494 |
| Rab31, member ras oncogene family                                              | <i>Rab31</i>         | -1,350568249 | 0,00081342 |
| Proteasome (prosome, macropain) subunit, alpha type 1                          | <i>Psm1</i>          | -1,349820545 | 0,00192112 |
| Polo-like kinase 3                                                             | <i>Plk3</i>          | -1,349796835 | 0,00563832 |
| Heterogeneous nuclear ribonucleoprotein u-like 1                               | <i>Hnrnpul1</i>      | -1,34975417  | 0,00173814 |
| Dead (asp-glu-ala-asp) box polypeptide 1                                       | <i>Ddx1</i>          | -1,349696324 | 0,0008106  |
| Single-stranded dna binding protein 1                                          | <i>Ssbp1</i>         | -1,349494347 | 0,00090205 |
| Rev3-like, catalytic subunit of dna polymerase zeta rad54 like (s. Cerevisiae) | <i>Rev3l</i>         | -1,349185236 | 0,0099583  |
| Lsm12 homolog (s. Cerevisiae)                                                  | <i>Lsm12</i>         | -1,349166024 | 0,00523963 |
| Sam domain and hd domain, 1                                                    | <i>Samhd1</i>        | -1,348840401 | 0,00527879 |
| Ptprf interacting protein, binding protein 2 (liprin beta 2)                   | <i>Ppfibp2</i>       | -1,348748474 | 0,00711523 |
| Keratin 15                                                                     | <i>Krt15</i>         | -1,348513833 | 0,00083959 |
| Trans-2,3-enoyl-coa reductase                                                  | <i>Tecr</i>          | -1,34800841  | 0,00389306 |
| Gtpase, imap family member 3                                                   | <i>Gimap3</i>        | -1,347988124 | 0,00590533 |
| Solute carrier family 35, member a5                                            | <i>Slc35a5</i>       | -1,347645097 | 0,00480858 |
| Chromatin accessibility complex 1                                              | <i>Chrac1</i>        | -1,347519287 | 0,0006881  |
| Riken cdna 0610009o20 gene                                                     | <i>0610009o20rik</i> | -1,347400049 | 0,00531128 |
| Inositol 1,3,4,5,6-pentakisphosphate 2-kinase                                  | <i>Ippk</i>          | -1,347148928 | 0,00407246 |
| Serine peptidase inhibitor, kazal type 3                                       | <i>Spink3</i>        | -1,346737555 | 0,00931477 |
| Butyrylcholinesterase                                                          | <i>Bche</i>          | -1,346619857 | 0,00073116 |
| Gap junction protein, delta 4                                                  | <i>Gjd4</i>          | -1,345932061 | 0,00971606 |
| Rho gtpase activating protein 17                                               | <i>Arhgap17</i>      | -1,345910833 | 0,00378658 |
| E2f transcription factor 5                                                     | <i>E2f5</i>          | -1,345723797 | 0,00080948 |

|                                                                                                                   |                      |              |            |
|-------------------------------------------------------------------------------------------------------------------|----------------------|--------------|------------|
| Minichromosome maintenance deficient 3 (s. Cerevisiae)                                                            | <i>Mcm3</i>          | -1,345667533 | 0,0029945  |
| Elastin                                                                                                           | <i>Eln</i>           | -1,345613139 | 0,00315182 |
| Transmembrane protein 243, mitochondrial                                                                          | <i>Tmem243</i>       | -1,345360098 | 0,00204396 |
| Coenzyme q6 homolog (yeast)                                                                                       | <i>Coq6</i>          | -1,344839781 | 0,00298912 |
| Set domain containing (lysine methyltransferase) 8                                                                | <i>Setd8</i>         | -1,344341794 | 0,00579129 |
| Collagen, type iii, alpha 1                                                                                       | <i>Col3a1</i>        | -1,344326808 | 0,00193321 |
| Antigen p97 (melanoma associated) identified by monoclonal antibodies 133.2 and 96.5                              | <i>Mfi2</i>          | -1,343625327 | 0,00337105 |
| Tubby like protein 1                                                                                              | <i>Tulp1</i>         | -1,343615872 | 0,00560734 |
| Relt-like 1                                                                                                       | <i>Rel1</i>          | -1,343541111 | 0,00387519 |
| Transmembrane protein 209                                                                                         | <i>Tmem209</i>       | -1,343313379 | 0,0082979  |
| High density lipoprotein (hdl) binding protein                                                                    | <i>Hdlbp</i>         | -1,343280791 | 0,00904891 |
| Ring finger and wd repeat domain 3                                                                                | <i>Rfwd3</i>         | -1,343032581 | 0,00067295 |
| Myotubularin related protein 10                                                                                   | <i>Mtmr10</i>        | -1,342826097 | 0,0005145  |
| Solute carrier family 35 (udp-glucuronic acid/udp-n-acetylgalactosamine dual transporter), member d1              | <i>Slc35d1</i>       | -1,342397947 | 0,00581453 |
| Nuclear receptor binding protein 1                                                                                | <i>Nrbp1</i>         | -1,341979119 | 0,00055189 |
| A disintegrin and metallopeptidase domain 19 (meltrin beta)                                                       | <i>Adam19</i>        | -1,341939341 | 0,00700387 |
| Zinc finger, mynd-type containing 8                                                                               | <i>Zmynd8</i>        | -1,341758236 | 0,00484394 |
| Muts homolog 3 (e. Coli)                                                                                          | <i>Msh3</i>          | -1,341672031 | 0,00270835 |
| Proteasome (prosome, macropain) 26s subunit, atpase 2                                                             | <i>Psmc2</i>         | -1,339791827 | 0,00075463 |
| Afg3-like aaa atpase 1                                                                                            | <i>Afg3l1</i>        | -1,338829686 | 0,00259355 |
| Ctd (carboxy-terminal domain, rna polymerase ii, polypeptide a) phosphatase, subunit 1                            | <i>Ctdp1</i>         | -1,338579178 | 0,00901345 |
| Nuclear receptor subfamily 2, group c, member 1                                                                   | <i>Nr2c1</i>         | -1,338236789 | 0,00299985 |
| Pet100 homolog (s. Cerevisiae)                                                                                    | <i>Pet100</i>        | -1,338186311 | 0,00933291 |
| F-box and leucine-rich repeat protein 14                                                                          | <i>Fbxl14</i>        | -1,337880835 | 0,00374285 |
| Circadian locomotor output cycles kaput                                                                           | <i>Clock</i>         | -1,337696602 | 0,00330167 |
| Atpase, h+/k+ transporting, nongastric, alpha polypeptide                                                         | <i>Atp12a</i>        | -1,33769012  | 0,00247154 |
| Prp4 pre-mrna processing factor 4 homolog b (yeast)                                                               | <i>Prpf4b</i>        | -1,337494461 | 0,0015523  |
| Elks/rab6-interacting/cast family member 1                                                                        | <i>Erc1</i>          | -1,337076013 | 0,00369759 |
| Otu deubiquitinase with linear linkage specificity                                                                | <i>Otulin</i>        | -1,336859004 | 0,00098526 |
| Bardet-biedl syndrome 2 (human)                                                                                   | <i>Bbs2</i>          | -1,336528986 | 0,00263815 |
| Riken cdna 1200014j11 gene                                                                                        | <i>1200014j11rik</i> | -1,336471829 | 0,00608704 |
| Phosphoribosylaminoimidazole carboxylase, phosphoribosylaminoribosylaminoimidazole, succinocarboxamide synthetase | <i>Paics</i>         | -1,336441038 | 0,00168846 |
| Expressed sequence c77080                                                                                         | <i>C77080</i>        | -1,336026101 | 0,00074303 |
| Coatomer protein complex, subunit zeta 2                                                                          | <i>Copz2</i>         | -1,335273556 | 0,00316921 |
| Transmembrane 4 superfamily member 4                                                                              | <i>Tm4sf4</i>        | -1,334967786 | 0,00726138 |
| Myocilin                                                                                                          | <i>Myoc</i>          | -1,334777962 | 0,00110334 |
| Rad50 homolog (s. Cerevisiae)                                                                                     | <i>Rad50</i>         | -1,334627979 | 0,00117525 |
| Glutamate receptor, ionotropic, delta 1                                                                           | <i>Grid1</i>         | -1,334347351 | 0,00574236 |
| Family with sequence similarity 193, member b                                                                     | <i>Fam193b</i>       | -1,334096435 | 0,00268641 |

|                                                                                                                                                                                                                                                     |                                                                                                                                                       |              |            |
|-----------------------------------------------------------------------------------------------------------------------------------------------------------------------------------------------------------------------------------------------------|-------------------------------------------------------------------------------------------------------------------------------------------------------|--------------|------------|
| Mus musculus es cells cdna, riken full-length enriched library, clone:2410038p04<br>product:suppressor of variegation 3-9 homolog 1 (drosophila), full insert sequence. /// --- /// predicted gene 14820                                            | <i>Ak010638</i> ///<br><i>gm14820</i> ///<br><i>gm14820</i>                                                                                           | -1,333945412 | 0,00447028 |
| Nadh dehydrogenase (ubiquinone) 1 beta subcomplex, 10                                                                                                                                                                                               | <i>Ndufb10</i>                                                                                                                                        | -1,333506904 | 0,00531904 |
| Predicted gene, 21098 /// reproductive homeobox 4a /// reproductive homeobox 4b /// reproductive homeobox 4c /// reproductive homeobox 4d /// reproductive homeobox 4e /// reproductive homeobox 4f /// reproductive homeobox 4g                    | <i>Gm21098</i> /// <i>rhox4a</i><br>/// <i>rhox4b</i> /// <i>rhox4c</i><br>/// <i>rhox4d</i> /// <i>rhox4e</i><br>/// <i>rhox4f</i> /// <i>rhox4g</i> | -1,333189185 | 0,00621877 |
| Ubiquitin carboxyl-terminal esterase l3 (ubiquitin thiolesterase) /// ubiquitin carboxyl-terminal esterase l4                                                                                                                                       | <i>Uchl3</i> /// <i>uchl4</i>                                                                                                                         | -1,33304537  | 0,00644936 |
| Calcium regulated heat stable protein 1                                                                                                                                                                                                             | <i>Carhsp1</i>                                                                                                                                        | -1,332997108 | 0,00053085 |
| Histone deacetylase 3                                                                                                                                                                                                                               | <i>Hdac3</i>                                                                                                                                          | -1,332749534 | 0,00053702 |
| Ly1 antibody reactive clone                                                                                                                                                                                                                         | <i>Lyar</i>                                                                                                                                           | -1,332651916 | 0,00328859 |
| Myeloid zinc finger 1                                                                                                                                                                                                                               | <i>Mzf1</i>                                                                                                                                           | -1,33235776  | 0,00300368 |
| Mediator complex subunit 6                                                                                                                                                                                                                          | <i>Med6</i>                                                                                                                                           | -1,33233527  | 0,00741957 |
| Ceramide synthase 5                                                                                                                                                                                                                                 | <i>Cers5</i>                                                                                                                                          | -1,331928295 | 0,00195878 |
| Karyopherin (importin) beta 1                                                                                                                                                                                                                       | <i>Kpnb1</i>                                                                                                                                          | -1,331800152 | 0,00265343 |
| Poly(a) binding protein, nuclear 1                                                                                                                                                                                                                  | <i>Pabpn1</i>                                                                                                                                         | -1,331729148 | 0,00573458 |
| Phospholipase b domain containing 2                                                                                                                                                                                                                 | <i>Plbd2</i>                                                                                                                                          | -1,331574051 | 0,00750228 |
| Predicted gene 5093 /// ribosomal protein l11                                                                                                                                                                                                       | <i>Gm5093</i> /// <i>rpl11</i>                                                                                                                        | -1,331380535 | 0,00885914 |
| Ww domain binding protein 4                                                                                                                                                                                                                         | <i>Wbp4</i>                                                                                                                                           | -1,330924198 | 0,00111322 |
| Protein kinase c, theta                                                                                                                                                                                                                             | <i>Prkcq</i>                                                                                                                                          | -1,330645826 | 0,0097813  |
| Cleavage and polyadenylation specific factor 7                                                                                                                                                                                                      | <i>Cpsf7</i>                                                                                                                                          | -1,330476938 | 0,00146186 |
| Cysteine-rich secretory protein lccl domain containing 1                                                                                                                                                                                            | <i>Crispld1</i>                                                                                                                                       | -1,330180459 | 0,00078499 |
| Suppressor of var1, 3-like 1 (s. Cerevisiae)                                                                                                                                                                                                        | <i>Supv3l1</i>                                                                                                                                        | -1,330143204 | 0,00100072 |
| Solute carrier family 2 (facilitated glucose transporter), member 1                                                                                                                                                                                 | <i>Slc2a1</i>                                                                                                                                         | -1,329984699 | 0,00126663 |
| Neurocan                                                                                                                                                                                                                                            | <i>Ncan</i>                                                                                                                                           | -1,329952116 | 0,00625487 |
| Lfng o-fucosylpeptide 3-beta-n-acetylglucosaminyltransferase                                                                                                                                                                                        | <i>Lfng</i>                                                                                                                                           | -1,329699571 | 0,00443231 |
| Upregulated during skeletal muscle growth 5                                                                                                                                                                                                         | <i>Usmg5</i>                                                                                                                                          | -1,329581966 | 0,00288419 |
| Proline/serine-rich coiled-coil 1                                                                                                                                                                                                                   | <i>Psrc1</i>                                                                                                                                          | -1,329504558 | 0,00405499 |
| Chromosome segregation 1-like (s. Cerevisiae)                                                                                                                                                                                                       | <i>Cse1l</i>                                                                                                                                          | -1,329250951 | 0,00331687 |
| Trans-acting transcription factor 1                                                                                                                                                                                                                 | <i>Sp1</i>                                                                                                                                            | -1,328910774 | 0,00947937 |
| Recname: full=ig gamma-2a chain c region secreted form; altname: full=b allele; /// recname: full=ig gamma-2a chain c region secreted form; altname: full=b allele; /// immunoglobulin heavy constant gamma 2c /// immunoglobulin heavy constant mu | <i>Igh</i> /// <i>ighg</i> /// <i>ighg2c</i><br>/// <i>ighm</i>                                                                                       | -1,328785633 | 0,00791706 |
| Cytochrome p450, family 1, subfamily b, polypeptide 1                                                                                                                                                                                               | <i>Cyp1b1</i>                                                                                                                                         | -1,328669977 | 0,00597309 |
| Adaptor-related protein complex 2, sigma 1 subunit                                                                                                                                                                                                  | <i>Ap2s1</i>                                                                                                                                          | -1,328652076 | 0,00160831 |
| Max dimerization protein 4                                                                                                                                                                                                                          | <i>Mxd4</i>                                                                                                                                           | -1,328385404 | 0,00210704 |
| Prominin 1                                                                                                                                                                                                                                          | <i>Prom1</i>                                                                                                                                          | -1,328053165 | 0,0094693  |
| Cytochrome c oxidase assembly protein 16                                                                                                                                                                                                            | <i>Cox16</i>                                                                                                                                          | -1,327969328 | 0,0027735  |



|                                                                                               |                          |              |            |
|-----------------------------------------------------------------------------------------------|--------------------------|--------------|------------|
| Cysteine-rich with egf-like domains 2                                                         | <i>Crel2</i>             | -1,327965475 | 0,0028769  |
| Map3k12 binding inhibitory protein 1                                                          | <i>Mbip</i>              | -1,327851962 | 0,00199928 |
| Double c2, beta                                                                               | <i>Doc2b</i>             | -1,327696564 | 0,00382008 |
| Dna-damage regulated autophagy modulator 1                                                    | <i>Dram1</i>             | -1,327530027 | 0,00263532 |
| Lectin, galactose binding, soluble 1                                                          | <i>Lgals1</i>            | -1,327477786 | 0,00062642 |
| Swi/snf related matrix associated, actin dependent regulator of chromatin, subfamily a-like 1 | <i>Smarcal1</i>          | -1,327331406 | 0,00861009 |
| Microtubule-actin crosslinking factor 1                                                       | <i>Macf1</i>             | -1,327186697 | 0,00635237 |
| Kell blood group                                                                              | <i>Kel</i>               | -1,327058461 | 0,00487903 |
| Frizzled homolog 2 (drosophila)                                                               | <i>Fzd2</i>              | -1,326601535 | 0,00236693 |
| Pleckstrin homology-like domain, family b, member 1                                           | <i>Phldb1</i>            | -1,326230211 | 0,00480782 |
| Trm2 trna methyltransferase 2a                                                                | <i>Trmt2a</i>            | -1,326196484 | 0,00142475 |
| Ubx domain protein 1                                                                          | <i>Ubxn1</i>             | -1,326190228 | 0,00155095 |
| Fk506 binding protein 1a                                                                      | <i>Fkbp1a</i>            | -1,325544051 | 0,00325173 |
| Telo2 interacting protein 2                                                                   | <i>Tti2</i>              | -1,325292037 | 0,00439235 |
| Protein phosphatase 1, regulatory subunit 21                                                  | <i>Ppp1r21</i>           | -1,32518526  | 0,00203975 |
| Wd repeat and fyve domain containing 2                                                        | <i>Wdly2</i>             | -1,324971696 | 0,00670683 |
| Purinergic receptor p2x, ligand-gated ion channel, 1                                          | <i>P2rx1</i>             | -1,324806709 | 0,00988871 |
| Ccz1 vacuolar protein trafficking and biogenesis associated                                   | <i>Ccz1</i>              | -1,324791602 | 0,0017004  |
| Phosphoribosyl pyrophosphate synthetase-associated protein 1                                  | <i>Prpsap1</i>           | -1,324691664 | 0,00155474 |
| Myosin x                                                                                      | <i>Myo10</i>             | -1,324520309 | 0,00559783 |
| Zinc finger and btb domain containing 25                                                      | <i>Zbtb25</i>            | -1,324114574 | 0,00174323 |
| Ribophorin i                                                                                  | <i>Rpn1</i>              | -1,323832903 | 0,00068684 |
| Ring finger protein 123                                                                       | <i>Rnf123</i>            | -1,323491384 | 0,00689963 |
| Comm domain containing 5                                                                      | <i>Comm5</i>             | -1,323324436 | 0,00237529 |
| Myosin ic                                                                                     | <i>Myo1c</i>             | -1,323246717 | 0,0018325  |
| Gli pathogenesis-related 2                                                                    | <i>Glipr2</i>            | -1,323226782 | 0,00142197 |
| Nuclear factor of activated t cells 5                                                         | <i>Nfat5</i>             | -1,323193399 | 0,0080933  |
| Capping protein (actin filament) muscle z-line, alpha 2                                       | <i>Capza2</i>            | -1,322842918 | 0,00050719 |
| Protein tyrosine phosphatase, receptor type, b                                                | <i>Ptpnb</i>             | -1,32268762  | 0,00263352 |
| Vaccinia related kinase 1                                                                     | <i>Vrk1</i>              | -1,322448331 | 0,00179834 |
| Shroom family member 1                                                                        | <i>Shroom1</i>           | -1,322094787 | 0,00802338 |
| Serine (or cysteine) peptidase inhibitor, clade i, member 1                                   | <i>Serpini1</i>          | -1,321998371 | 0,00304206 |
| Mitochondrial carrier homolog 1 (c. Elegans)                                                  | <i>Mtch1</i>             | -1,321546526 | 0,00466856 |
| Polymerase (rna) ii (dna directed) polypeptide d                                              | <i>Polr2d</i>            | -1,321544223 | 0,00273541 |
| Prefoldin 5                                                                                   | <i>Pfdn5</i>             | -1,321007232 | 0,00387519 |
| N-myc downstream regulated gene 1                                                             | <i>Ndr1</i>              | -1,32093686  | 0,00144734 |
| Nadh dehydrogenase (ubiquinone) 1 alpha subcomplex, 4                                         | <i>Ndufa4</i>            | -1,320822123 | 0,00198703 |
| Tissue factor pathway inhibitor 2                                                             | <i>Tfpi2</i>             | -1,32065211  | 0,00477749 |
| Predicted pseudogene 10651 /// josephin domain containing 1                                   | <i>Gm10651 /// josd1</i> | -1,32050493  | 0,00170921 |

|                                                                                                     |                                                       |              |            |
|-----------------------------------------------------------------------------------------------------|-------------------------------------------------------|--------------|------------|
| Regulatory factor x, 2 (influences hla class ii expression)                                         | <i>Rfx2</i>                                           | -1,3204287   | 0,00087214 |
| Charged multivesicular body protein 2a                                                              | <i>Chmp2a</i>                                         | -1,320395453 | 0,00288071 |
| Muskelin 1, intracellular mediator containing kelch motifs                                          | <i>Mkln1</i>                                          | -1,31990338  | 0,00090907 |
| Adaptor protein complex ap-1, gamma 1 subunit                                                       | <i>Ap1g1</i>                                          | -1,319639767 | 0,00768702 |
| Glutamyl-trna(gln) amidotransferase, subunit c homolog (bacterial)                                  | <i>Gatc</i>                                           | -1,318521746 | 0,00263352 |
| Cdgsh iron sulfur domain 1                                                                          | <i>Cisd1</i>                                          | -1,317771694 | 0,00157984 |
| Embryonic ectoderm development                                                                      | <i>Eed</i>                                            | -1,317572996 | 0,00221661 |
| Riken cdna 5430435g22 gene                                                                          | <i>5430435g22rik</i>                                  | -1,316985108 | 0,00622664 |
| Solute carrier family 22 (organic cation transporter), member 13                                    | <i>Slc22a13</i>                                       | -1,316808639 | 0,00609069 |
| Ran binding protein 10                                                                              | <i>Ranbp10</i>                                        | -1,316704438 | 0,0021129  |
| Swi/snf related, matrix associated, actin dependent regulator of chromatin, subfamily a, member 4   | <i>Smarca4</i>                                        | -1,316680966 | 0,00287786 |
| Tnf receptor-associated factor 7                                                                    | <i>Traf7</i>                                          | -1,31606588  | 0,00068838 |
| Tumor necrosis factor receptor superfamily, member 14 (herpesvirus entry mediator)                  | <i>Tnfrsf14</i>                                       | -1,315649771 | 0,00885914 |
| Vaccinia related kinase 2                                                                           | <i>Vrk2</i>                                           | -1,315508226 | 0,00513211 |
| Tubulin, beta 2a class iia                                                                          | <i>Tubb2a</i>                                         | -1,315437059 | 0,00121214 |
| Muts homolog 5 (e. Coli)                                                                            | <i>Msh5</i>                                           | -1,315311973 | 0,00463551 |
| Trafficking protein particle complex subunit 10-like<br>/// trafficking protein particle complex 10 | <i>Loc102641872</i> ///<br><i>trappc10</i>            | -1,313890869 | 0,00174965 |
| Polymerase (rna) ii (dna directed) polypeptide f                                                    | <i>Polr2f</i>                                         | -1,313791994 | 0,00485527 |
| Methionine aminopeptidase 2                                                                         | <i>Metap2</i>                                         | -1,313718764 | 0,00476067 |
| Predicted gene 15583 /// zinc finger, bed domain containing 4                                       | <i>Gm15583</i> /// <i>zbed4</i>                       | -1,313178073 | 0,00102691 |
| Fk506 binding protein 2                                                                             | <i>Fkbp2</i>                                          | -1,313104623 | 0,00212155 |
| Damage specific dna binding protein 1                                                               | <i>Ddb1</i>                                           | -1,312985441 | 0,00622694 |
| Gpi anchor attachment protein 1                                                                     | <i>Gpaa1</i>                                          | -1,312877962 | 0,00167441 |
| Cell cycle activator and apoptosis regulator 2                                                      | <i>Ccar2</i>                                          | -1,312779326 | 0,00430995 |
| Atpase, h+ transporting, lysosomal v1 subunit c1                                                    | <i>Atp6v1c1</i>                                       | -1,31203968  | 0,00775678 |
| Interleukin 17 receptor d                                                                           | <i>Il17rd</i>                                         | -1,312013044 | 0,00316584 |
| Polymerase (rna) ii (dna directed) polypeptide c                                                    | <i>Polr2c</i>                                         | -1,311335557 | 0,00117525 |
| Dnaj (hsp40) homolog, subfamily c, member 2                                                         | <i>Dnajc2</i>                                         | -1,310544183 | 0,00124373 |
| Archain 1                                                                                           | <i>Arcn1</i>                                          | -1,309996719 | 0,00137791 |
| Dynein, axonemal assembly factor 2 /// ribosomal protein l36a /// ribosomal protein l36a-like       | <i>Dnaaf2</i> /// <i>rpl36a</i> ///<br><i>rpl36al</i> | -1,309825571 | 0,00096137 |
| Eukaryotic translation initiation factor 3, subunit l                                               | <i>Eif3l</i>                                          | -1,309688734 | 0,0033141  |
| Snf8, escrt-ii complex subunit, homolog (s. Cerevisiae)                                             | <i>Snf8</i>                                           | -1,309500335 | 0,00471582 |
| Kelch-like ech-associated protein 1                                                                 | <i>Keap1</i>                                          | -1,309171427 | 0,00402377 |
| Was protein family homolog                                                                          | <i>Wash</i>                                           | -1,308836488 | 0,00261044 |
| Component of oligomeric golgi complex 1                                                             | <i>Cog1</i>                                           | -1,308726666 | 0,00745746 |
| Uridine-cytidine kinase 1-like 1                                                                    | <i>Uckl1</i>                                          | -1,308378905 | 0,00169268 |
| Transcription factor 7, t cell specific                                                             | <i>Tcf7</i>                                           | -1,308190521 | 0,0021129  |
| Ornithine decarboxylase antizyme 1 /// ornithine decarboxylase antizyme 1, pseudogene               | <i>Oaz1</i> /// <i>oaz1-ps</i>                        | -1,308113645 | 0,00522148 |

|                                                                  |                         |              |            |
|------------------------------------------------------------------|-------------------------|--------------|------------|
| Sphingomyelin synthase 1                                         | <i>Sgms1</i>            | -1,307685601 | 0,00413478 |
| Iq motif containing gtpase activating protein 1                  | <i>Iqgap1</i>           | -1,307586695 | 0,00257224 |
| Leucine rich repeat containing 14                                | <i>Lrrc14</i>           | -1,307484038 | 0,00249518 |
| Angiotensinogen (serpin peptidase inhibitor, clade a, member 8)  | <i>Agt</i>              | -1,307452794 | 0,00230782 |
| Protein kinase, camp dependent regulatory, type i, alpha         | <i>Prkar1a</i>          | -1,307112901 | 0,00207238 |
| Prostate tumor over expressed gene 1                             | <i>Ptov1</i>            | -1,307102959 | 0,00567925 |
| Ubiquitin specific peptidase 49                                  | <i>Usp49</i>            | -1,306417208 | 0,00172038 |
| Sorting nexin family member 21                                   | <i>Snx21</i>            | -1,306404451 | 0,00809986 |
| Nad kinase                                                       | <i>Nadk</i>             | -1,306307769 | 0,00345    |
| Predicted gene 7008                                              | <i>Gm7008</i>           | -1,306295584 | 0,00097157 |
| Triple functional domain (ptprf interacting)                     | <i>Trio</i>             | -1,306146432 | 0,00585119 |
| Atpase, h+ transporting, lysosomal v0 subunit a1                 | <i>Atp6v0a1</i>         | -1,306123616 | 0,00777495 |
| Short stature homeobox 2                                         | <i>Shox2</i>            | -1,306118348 | 0,00784472 |
| Gram domain containing 4                                         | <i>Gramd4</i>           | -1,306016378 | 0,00254043 |
| Gonadotropin releasing hormone receptor                          | <i>Gnrhr</i>            | -1,305523614 | 0,00992651 |
| Prenylcysteine oxidase 1                                         | <i>Pcyox1</i>           | -1,305148599 | 0,00190759 |
| Structural maintenance of chromosomes 1a                         | <i>Smc1a</i>            | -1,305121019 | 0,00182275 |
| Pentatricopeptide repeat domain 2                                | <i>Ptcd2</i>            | -1,304451081 | 0,00236549 |
| Target of myb1-like 2 (chicken)                                  | <i>Tom1l2</i>           | -1,30437179  | 0,00772106 |
| Dbf4 homolog (s. Cerevisiae)                                     | <i>Dbf4</i>             | -1,303694807 | 0,00652788 |
| Small integral membrane protein 3                                | <i>Smim3</i>            | -1,303571651 | 0,00081184 |
| Bloom syndrome, recq helicase-like                               | <i>Blm</i>              | -1,303462993 | 0,00916158 |
| Mannosidase, beta a, lysosomal-like                              | <i>Manbal</i>           | -1,303354305 | 0,00367869 |
| Immunoglobulin heavy constant mu                                 | <i>Ighm</i>             | -1,303327395 | 0,00479781 |
| Brca1 interacting protein c-terminal helicase 1, opposite strand | <i>Brip1os</i>          | -1,302771668 | 0,0009038  |
| A kinase (prka) interacting protein 1                            | <i>Akip1</i>            | -1,302672476 | 0,00172821 |
| Intraflagellar transport 74                                      | <i>Ift74</i>            | -1,301804231 | 0,00871834 |
| Cytochrome c oxidase assembly factor 6 /// predicted gene, 17296 | <i>Coa6 /// gm17296</i> | -1,301684675 | 0,00299983 |
| Inositol 1,3,4-triphosphate 5/6 kinase                           | <i>Itpk1</i>            | -1,301266342 | 0,00400812 |
| Suppression of tumorigenicity 7                                  | <i>St7</i>              | -1,301171008 | 0,0032266  |
| Cadherin-related family member 5                                 | <i>Cdhr5</i>            | -1,300913971 | 0,00334199 |
| Ring finger protein 41                                           | <i>Rnf41</i>            | -1,300490866 | 0,002289   |
| Rna 2',3'-cyclic phosphate and 5'-oh ligase                      | <i>Rtcb</i>             | -1,300480028 | 0,00153182 |
| E74-like factor 5                                                | <i>Elf5</i>             | -1,300346897 | 0,0089453  |
| Zinc finger protein 395                                          | <i>Zfp395</i>           | -1,300251244 | 0,00846254 |
| Mtor associated protein, lst8 homolog (s. Cerevisiae)            | <i>Mlst8</i>            | -1,300176834 | 0,00720735 |
| Resistin like beta                                               | <i>Retnlb</i>           | -1,300106265 | 0,00638481 |
| Scaffold attachment factor b                                     | <i>Safb</i>             | -1,300102793 | 0,00732771 |
| S-adenosylmethionine decarboxylase 1                             | <i>Amd1</i>             | -1,300024071 | 0,0024092  |
| Proacrosin binding protein                                       | <i>Acrbp</i>            | -1,29962059  | 0,0049058  |
| Cts telomere maintenance complex component 1                     | <i>Ctc1</i>             | -1,299068874 | 0,00304609 |
| Mitochondrial ribosomal protein s36                              | <i>Mrps36</i>           | -1,299055367 | 0,00094888 |

|                                                                                                                                                           |                                                                     |              |            |
|-----------------------------------------------------------------------------------------------------------------------------------------------------------|---------------------------------------------------------------------|--------------|------------|
| Methylmalonic aciduria (cobalamin deficiency) type b homolog (human)                                                                                      | <i>Mmab</i>                                                         | -1,298846572 | 0,00998402 |
| Fxyd domain-containing ion transport regulator 5                                                                                                          | <i>Fxyd5</i>                                                        | -1,298693629 | 0,00581267 |
| Basic leucine zipper transcription factor, atf-like 3                                                                                                     | <i>Batf3</i>                                                        | -1,298324508 | 0,0059457  |
| Inhibitor of growth family, member 3                                                                                                                      | <i>Ing3</i>                                                         | -1,298082979 | 0,00137683 |
| Profilin 2                                                                                                                                                | <i>Pfn2</i>                                                         | -1,298071788 | 0,00485894 |
| G protein-coupled receptor 180                                                                                                                            | <i>Gpr180</i>                                                       | -1,297951457 | 0,00302655 |
| Cyclin e1                                                                                                                                                 | <i>Ccne1</i>                                                        | -1,297594135 | 0,00301078 |
| Coiled-coil domain containing 34                                                                                                                          | <i>Ccdc34</i>                                                       | -1,297450078 | 0,00233389 |
| Riken cdna b230219d22 gene                                                                                                                                | <i>B230219d22rik</i>                                                | -1,296844335 | 0,00277407 |
| Coronin, actin binding protein 1b                                                                                                                         | <i>Coro1b</i>                                                       | -1,296786066 | 0,00776905 |
| Unc-45 homolog a (c. Elegans)                                                                                                                             | <i>Unc45a</i>                                                       | -1,29674474  | 0,00220052 |
| Comm domain containing 6                                                                                                                                  | <i>Comm6</i>                                                        | -1,296679989 | 0,00534584 |
| Zinc finger protein 91                                                                                                                                    | <i>Zfp91</i>                                                        | -1,296510442 | 0,00443919 |
| Cytochrome c-1                                                                                                                                            | <i>Cyc1</i>                                                         | -1,296222446 | 0,00218311 |
| Pantothenate kinase 3                                                                                                                                     | <i>Pank3</i>                                                        | -1,296100998 | 0,00448965 |
| Comm domain containing 1                                                                                                                                  | <i>Comm1</i>                                                        | -1,296034476 | 0,00248953 |
| Germ cell-less homolog 1 (drosophila)                                                                                                                     | <i>Gmcl1</i>                                                        | -1,29594052  | 0,00789226 |
| Tuftelin interacting protein 11                                                                                                                           | <i>Tfip11</i>                                                       | -1,295831545 | 0,00772185 |
| Mediator complex subunit 22                                                                                                                               | <i>Med22</i>                                                        | -1,295646252 | 0,00626979 |
| Syndecan 2                                                                                                                                                | <i>Sdc2</i>                                                         | -1,295607918 | 0,00338353 |
| Hyaluronoglucosaminidase 1 /// n-acetyltransferase 6                                                                                                      | <i>Hyal1 /// nat6</i>                                               | -1,295187601 | 0,00733648 |
| Myristoylated alanine rich protein kinase c substrate                                                                                                     | <i>Marcks</i>                                                       | -1,295175383 | 0,00237535 |
| Seminal vesicle secretory protein 3a /// seminal vesicle secretory protein 3b                                                                             | <i>Svs3a /// svs3b</i>                                              | -1,294953598 | 0,00368974 |
| Surfactant associated protein c                                                                                                                           | <i>Sftpc</i>                                                        | -1,294363451 | 0,00783701 |
| Ruvb-like protein 1                                                                                                                                       | <i>Ruvbl1</i>                                                       | -1,294158337 | 0,00162375 |
| Kruppel-like factor 12                                                                                                                                    | <i>Klf12</i>                                                        | -1,293774807 | 0,00275989 |
| F-box protein 21                                                                                                                                          | <i>Fbxo21</i>                                                       | -1,293558175 | 0,00578939 |
| Wilms tumor 1 homolog                                                                                                                                     | <i>Wt1</i>                                                          | -1,293261567 | 0,00732771 |
| Solute carrier family 25 (mitochondrial carrier, phosphate carrier), member 3                                                                             | <i>Slc25a3</i>                                                      | -1,2929984   | 0,00177217 |
| Protease, serine 40                                                                                                                                       | <i>Prss40</i>                                                       | -1,292365475 | 0,00867599 |
| Proteasome (prosome, macropain) subunit, beta type 3                                                                                                      | <i>Psm3</i>                                                         | -1,292202837 | 0,00915267 |
| Nadh dehydrogenase (ubiquinone) 1 beta subcomplex, 2                                                                                                      | <i>Ndufb2</i>                                                       | -1,29217104  | 0,00814302 |
| Atp synthase, h+ transporting, mitochondrial f1 complex, delta subunit                                                                                    | <i>Atp5d</i>                                                        | -1,291637831 | 0,00378039 |
| Retinol binding protein 3, interstitial                                                                                                                   | <i>Rbp3</i>                                                         | -1,291584781 | 0,0088249  |
| Solute carrier family 30 (zinc transporter), member 5                                                                                                     | <i>Slc30a5</i>                                                      | -1,291160575 | 0,00902024 |
| Sh3-domain grb2-like 1                                                                                                                                    | <i>Sh3gl1</i>                                                       | -1,290849622 | 0,0017069  |
| Predicted gene 10257 /// predicted gene 12657 /// predicted pseudogene 6749 /// h3 histone, family 3a /// h3 histone, family 3b /// h3 histone, family 3c | <i>Gm10257 /// gm12657 /// gm6749 /// h3f3a /// h3f3b /// h3f3c</i> | -1,290222761 | 0,00973926 |
| Tropomyosin 4                                                                                                                                             | <i>Tpm4</i>                                                         | -1,290028116 | 0,00103541 |

|                                                                                                          |                               |              |            |
|----------------------------------------------------------------------------------------------------------|-------------------------------|--------------|------------|
| Perp, tp53 apoptosis effector                                                                            | <i>Perp</i>                   | -1,289560589 | 0,00458591 |
| Dedicator of cytokinesis 6                                                                               | <i>Dock6</i>                  | -1,289184693 | 0,00927077 |
| Btb and cnc homology 1                                                                                   | <i>Bach1</i>                  | -1,289174467 | 0,00488863 |
| Sperm associated antigen 6                                                                               | <i>Spag6</i>                  | -1,289097276 | 0,00609537 |
| Signal peptide peptidase 3                                                                               | <i>Sppl3</i>                  | -1,288781875 | 0,00202368 |
| Sad1 and unc84 domain containing 2                                                                       | <i>Sun2</i>                   | -1,28857797  | 0,00130131 |
| Potassium channel, subfamily k, member 3                                                                 | <i>Kcnk3</i>                  | -1,288553733 | 0,00790625 |
| Peptidyl-trna hydrolase domain containing 1                                                              | <i>Pthrhd1</i>                | -1,288443966 | 0,00800054 |
| Chromobox 1                                                                                              | <i>Cbx1</i>                   | -1,288184963 | 0,00634871 |
| Ferm, rhogef (arhgef) and pleckstrin domain protein 1 (chondrocyte-derived)                              | <i>Farp1</i>                  | -1,28779983  | 0,00771545 |
| Cop9 (constitutive photomorphogenic) homolog, subunit 4 (arabidopsis thaliana)                           | <i>Cops4</i>                  | -1,287714594 | 0,00592989 |
| Cystatin 10 (chondrocytes)                                                                               | <i>Cst10</i>                  | -1,287599009 | 0,00912545 |
| Biliverdin reductase a                                                                                   | <i>Blvra</i>                  | -1,28691137  | 0,00367912 |
| Regenerating islet-derived 3 gamma                                                                       | <i>Reg3g</i>                  | -1,286723769 | 0,00697073 |
| Ribosomal protein l41                                                                                    | <i>Rpl41</i>                  | -1,286381277 | 0,00976707 |
| Tachykinin receptor 1                                                                                    | <i>Tacr1</i>                  | -1,286070787 | 0,00681488 |
| Adrenergic receptor, alpha 2c                                                                            | <i>Adra2c</i>                 | -1,285738708 | 0,00860236 |
| Carboxylesterase 4a                                                                                      | <i>Ces4a</i>                  | -1,285256641 | 0,00750583 |
| Vasoactive intestinal polypeptide                                                                        | <i>Vip</i>                    | -1,285250465 | 0,00376049 |
| Tumor necrosis factor receptor superfamily, member 8                                                     | <i>Tnfrsf8</i>                | -1,285212687 | 0,0089498  |
| Abra c-terminal like /// predicted pseudogene 6314                                                       | <i>Abracl /// gm6314</i>      | -1,28502546  | 0,00490399 |
| Uncharacterized loc102634352 /// snf2-related crebbp activator protein                                   | <i>Loc102634352 /// srcap</i> | -1,284878191 | 0,00327787 |
| Protein phosphatase 1d magnesium-dependent, delta isoform                                                | <i>Ppm1d</i>                  | -1,284763883 | 0,0027438  |
| Interleukin 10 receptor, alpha                                                                           | <i>Il10ra</i>                 | -1,284755923 | 0,00555912 |
| Megakaryocyte-associated tyrosine kinase                                                                 | <i>Matk</i>                   | -1,284029231 | 0,00535424 |
| Transmembrane protein 39a                                                                                | <i>Tmem39a</i>                | -1,283954663 | 0,00595468 |
| Dsn1, mind kinetochore complex component, homolog (s. Cerevisiae)                                        | <i>Dsn1</i>                   | -1,283709866 | 0,00945271 |
| Transmembrane protein 55a                                                                                | <i>Tmem55a</i>                | -1,283685399 | 0,00927041 |
| Adenylosuccinate lyase                                                                                   | <i>Adsl</i>                   | -1,283609785 | 0,00308967 |
| Small nuclear ribonucleoprotein polypeptide g                                                            | <i>Snrpg</i>                  | -1,283288615 | 0,00447812 |
| Growth differentiation factor 2                                                                          | <i>Gdf2</i>                   | -1,283170765 | 0,00822584 |
| Heterogeneous nuclear ribonucleoprotein h3                                                               | <i>Hnrnp3</i>                 | -1,283066236 | 0,00447648 |
| Coxsackie virus and adenovirus receptor                                                                  | <i>Cxadr</i>                  | -1,282979839 | 0,00869216 |
| Frequently rearranged in advanced t cell lymphomas                                                       | <i>Frat1</i>                  | -1,282968187 | 0,0029824  |
| Annexin a1                                                                                               | <i>Anxa1</i>                  | -1,28268253  | 0,00283106 |
| Protein phosphatase 1, regulatory subunit 10 pseudogene /// protein phosphatase 1, regulatory subunit 10 | <i>Gm8801 /// ppp1r10</i>     | -1,281987898 | 0,00350555 |
| Dynactin 2                                                                                               | <i>Dctn2</i>                  | -1,28198165  | 0,00349824 |
| Udp-n-acetyl-alpha-d-galactosamine:polypeptide n-acetylgalactosaminyltransferase 11                      | <i>Galnt11</i>                | -1,281660171 | 0,00558055 |
| Atpase, ca++ transporting, cardiac muscle, fast twitch 1                                                 | <i>Atp2a1</i>                 | -1,281531369 | 0,00570279 |

|                                                                                                   |                                   |              |            |
|---------------------------------------------------------------------------------------------------|-----------------------------------|--------------|------------|
| Solute carrier family 39 (zinc transporter), member 3                                             | <i>Slc39a3</i>                    | -1,281218148 | 0,00227737 |
| Ras homolog gene family, member d                                                                 | <i>Rhod</i>                       | -1,280785478 | 0,00639226 |
| Radial spoke 3a homolog (chlamydomonas) /// radial spoke 3b homolog (chlamydomonas)               | <i>Rsph3a</i> /// <i>rsph3b</i>   | -1,27999638  | 0,00268564 |
| Sec24 related gene family, member c (s. Cerevisiae)                                               | <i>Sec24c</i>                     | -1,279856985 | 0,00374598 |
| Potassium channel modulatory factor 1                                                             | <i>Kcmf1</i>                      | -1,279760115 | 0,00237822 |
| Ino80 complex subunit c                                                                           | <i>Ino80c</i>                     | -1,279637202 | 0,0075302  |
| Taurine upregulated gene 1                                                                        | <i>Tug1</i>                       | -1,279599747 | 0,00785121 |
| Striatin, calmodulin binding protein 4                                                            | <i>Strn4</i>                      | -1,278646138 | 0,00916016 |
| Replication initiator 1                                                                           | <i>Repin1</i>                     | -1,278236635 | 0,00331089 |
| Asparagine-linked glycosylation 2 (alpha-1,3-mannosyltransferase)                                 | <i>Alg2</i>                       | -1,278207037 | 0,00588691 |
| Tp53rk binding protein                                                                            | <i>Tprkb</i>                      | -1,27733954  | 0,00504489 |
| Succinate dehydrogenase complex assembly factor 2                                                 | <i>Sdhaf2</i>                     | -1,276838195 | 0,00232091 |
| Predicted gene 13669 /// proteolipid protein 2                                                    | <i>Gm13669</i> /// <i>plp2</i>    | -1,276559617 | 0,00680105 |
| Ddb1 and cul4 associated factor 13                                                                | <i>Dcaf13</i>                     | -1,276390458 | 0,00208389 |
| Transcription factor 25 (basic helix-loop-helix)                                                  | <i>Tcf25</i>                      | -1,275564606 | 0,00212128 |
| Matrix metalloproteinase 17                                                                       | <i>Mmp17</i>                      | -1,275478435 | 0,00242877 |
| Small nuclear rna activating complex, polypeptide 3                                               | <i>Snapc3</i>                     | -1,27539835  | 0,00287369 |
| Dead (asp-glu-ala-asp) box polypeptide 19b                                                        | <i>Ddx19b</i>                     | -1,274955157 | 0,00452839 |
| Small nuclear rna activating complex, polypeptide 2                                               | <i>Snapc2</i>                     | -1,274886672 | 0,00478068 |
| Nyn domain and retroviral integrase containing                                                    | <i>Nynrin</i>                     | -1,274825043 | 0,00647084 |
| C-type lectin domain family 4, member a2 /// c-type lectin domain family 4, member b1             | <i>Clec4a2</i> /// <i>clec4b1</i> | -1,274739638 | 0,00766852 |
| Eukaryotic translation initiation factor 3, subunit b                                             | <i>Eif3b</i>                      | -1,274379967 | 0,00413057 |
| Rna binding motif protein 8a                                                                      | <i>Rbm8a</i>                      | -1,273351667 | 0,00403954 |
| Heterochromatin protein 1, binding protein 3                                                      | <i>Hp1bp3</i>                     | -1,273135296 | 0,00191154 |
| Translocase of outer mitochondrial membrane 22 homolog (yeast)                                    | <i>Tomm22</i>                     | -1,272735787 | 0,00200546 |
| Tetraspanin 4                                                                                     | <i>Tspan4</i>                     | -1,272695186 | 0,00694592 |
| Zinc finger protein 286                                                                           | <i>Zfp286</i>                     | -1,272017806 | 0,00582168 |
| Cop9 (constitutive photomorphogenic) homolog, subunit 3 (arabidopsis thaliana)                    | <i>Cops3</i>                      | -1,271741471 | 0,00175797 |
| Ubiquitin-conjugating enzyme e2a                                                                  | <i>Ube2a</i>                      | -1,27090399  | 0,0082239  |
| Rala binding protein 1                                                                            | <i>Ralbp1</i>                     | -1,270608367 | 0,00360257 |
| Solute carrier family 38, member 2                                                                | <i>Slc38a2</i>                    | -1,270483443 | 0,00288048 |
| Adenylosuccinate synthetase like 1                                                                | <i>Adssl1</i>                     | -1,270157446 | 0,00608192 |
| Emg1 nucleolar protein homolog (s. Cerevisiae)                                                    | <i>Emg1</i>                       | -1,270125869 | 0,00609516 |
| Growth differentiation factor 3                                                                   | <i>Gdf3</i>                       | -1,269936167 | 0,00937722 |
| Succinate-coa ligase, gdp-forming, alpha subunit                                                  | <i>Suclg1</i>                     | -1,268633382 | 0,00285202 |
| Dpy-30 homolog (c. Elegans)                                                                       | <i>Dpy30</i>                      | -1,268238353 | 0,00548668 |
| Sine oculis-binding protein homolog (drosophila)                                                  | <i>Sobp</i>                       | -1,267983528 | 0,00518113 |
| Kaptn                                                                                             | <i>Kptn</i>                       | -1,267951747 | 0,00695972 |
| Swi/snf related, matrix associated, actin dependent regulator of chromatin, subfamily a, member 2 | <i>Smarca2</i>                    | -1,267926806 | 0,00923893 |
| Huntingtin interacting protein 1 related                                                          | <i>Hip1r</i>                      | -1,26783685  | 0,00822584 |
| Lim domain binding 1                                                                              | <i>Ldb1</i>                       | -1,267725087 | 0,00720703 |

|                                                                                                                         |                                                    |              |            |
|-------------------------------------------------------------------------------------------------------------------------|----------------------------------------------------|--------------|------------|
| Sorting nexin 15                                                                                                        | <i>Snx15</i>                                       | -1,267391804 | 0,00293635 |
| Three prime repair exonuclease 2                                                                                        | <i>Trex2</i>                                       | -1,267155879 | 0,00693519 |
| Predicted pseudogene 10224 /// predicted gene 4581<br>/// ribosomal protein l15 pseudogene /// ribosomal<br>protein l15 | <i>Gm10224 /// gm4581<br/>/// gm6937 /// rpl15</i> | -1,266736688 | 0,00412713 |
| Atpase, h+ transporting, lysosomal v1 subunit e1                                                                        | <i>Atp6v1e1</i>                                    | -1,266650307 | 0,00916375 |
| Prostaglandin e receptor 4 (subtype ep4)                                                                                | <i>Ptger4</i>                                      | -1,265393941 | 0,00740536 |
| Lethal giant larvae homolog 1 (drosophila)                                                                              | <i>Llgl1</i>                                       | -1,26465007  | 0,00336144 |
| Zinc finger, dhhc domain containing 3                                                                                   | <i>Zdhhc3</i>                                      | -1,264396085 | 0,00434732 |
| Max interacting protein 1                                                                                               | <i>Mxi1</i>                                        | -1,26406778  | 0,00695126 |
| Phosphofurin acidic cluster sorting protein 1                                                                           | <i>Pacs1</i>                                       | -1,263976701 | 0,00531904 |
| Atpase inhibitory factor 1                                                                                              | <i>Atpif1</i>                                      | -1,26383981  | 0,00783224 |
| Signal transducer and activator of transcription 5b                                                                     | <i>Stat5b</i>                                      | -1,263279356 | 0,00614877 |
| Cytohesin 2                                                                                                             | <i>Cyth2</i>                                       | -1,262732749 | 0,00584268 |
| Copine ii                                                                                                               | <i>Cpne2</i>                                       | -1,262676666 | 0,00965095 |
| Potassium channel tetramerisation domain<br>containing 2                                                                | <i>Kctd2</i>                                       | -1,261555995 | 0,00674746 |
| Actin-like 6a                                                                                                           | <i>Actl6a</i>                                      | -1,261469968 | 0,0062189  |
| Chemokine (c-x-c motif) receptor 3                                                                                      | <i>Cxcr3</i>                                       | -1,261357117 | 0,00234648 |
| Solute carrier family 32 (gaba vesicular transporter),<br>member 1                                                      | <i>Slc32a1</i>                                     | -1,261042002 | 0,00176696 |
| Gamma-aminobutyric acid (gaba) c receptor, subunit<br>rho 1                                                             | <i>Gabrr1</i>                                      | -1,261017677 | 0,00806229 |
| T cell leukemia translocation altered gene                                                                              | <i>Tcta</i>                                        | -1,260881827 | 0,00498344 |
| Oleoyl-acp hydrolase                                                                                                    | <i>Olah</i>                                        | -1,260493271 | 0,00858526 |
| Special at-rich sequence binding protein 2                                                                              | <i>Satb2</i>                                       | -1,260213326 | 0,00397201 |
| Riken cdna 1810009a15 gene /// uncharacterized<br>loc102308570                                                          | <i>1810009a15rik ///<br/>loc102308570</i>          | -1,259864798 | 0,00588047 |
| Signal peptide peptidase like 2b                                                                                        | <i>Sppl2b</i>                                      | -1,259821209 | 0,00536445 |
| Zinc finger, dhhc domain containing 7                                                                                   | <i>Zdhhc7</i>                                      | -1,25932163  | 0,00298957 |
| Membrane metallo-endopeptidase-like 1                                                                                   | <i>Mmel1</i>                                       | -1,259089966 | 0,00699317 |
| Mediator complex subunit 15                                                                                             | <i>Med15</i>                                       | -1,258957429 | 0,00907424 |
| Polybromo 1                                                                                                             | <i>Pbrm1</i>                                       | -1,258408236 | 0,00853597 |
| Regulator of chromosome condensation (rcc1) and<br>btb (poz) domain containing protein 2                                | <i>Rcbtb2</i>                                      | -1,25839039  | 0,00308771 |
| Vaccinia related kinase 3                                                                                               | <i>Vrk3</i>                                        | -1,258119721 | 0,00587475 |
| Potassium voltage gated channel, shaw-related<br>subfamily, member 3                                                    | <i>Kcnc3</i>                                       | -1,257624758 | 0,00348333 |
| Family with sequence similarity 107, member b                                                                           | <i>Fam107b</i>                                     | -1,257176547 | 0,00846216 |
| Nucleosome assembly protein 1-like 4                                                                                    | <i>Nap1l4</i>                                      | -1,25456094  | 0,00204135 |
| Wingless-type mmtv integration site family, member<br>4                                                                 | <i>Wnt4</i>                                        | -1,253937725 | 0,00956963 |
| Ribosomal protein s27-like                                                                                              | <i>Rps27l</i>                                      | -1,253578191 | 0,00659344 |
| Heterogeneous nuclear ribonucleoprotein u                                                                               | <i>Hnrnpu</i>                                      | -1,253564016 | 0,00511649 |
| Regulator of chromosome condensation 2                                                                                  | <i>Rcc2</i>                                        | -1,253303131 | 0,00983452 |
| Bromodomain and phd finger containing, 1                                                                                | <i>Brpf1</i>                                       | -1,253017365 | 0,0032912  |
| Phosphatidylethanolamine binding protein 1                                                                              | <i>Pebp1</i>                                       | -1,25284696  | 0,00254722 |
| Minichromosome maintenance deficient 10 (s.<br>Cerevisiae)                                                              | <i>Mcm10</i>                                       | -1,252741446 | 0,00633809 |

|                                                                                                                         |                                               |              |            |
|-------------------------------------------------------------------------------------------------------------------------|-----------------------------------------------|--------------|------------|
| Rad9-hus1-rad1 interacting nuclear orphan 1                                                                             | <i>Rhno1</i>                                  | -1,25257807  | 0,00953696 |
| 4haus augmin-like complex, subunit 8                                                                                    | <i>Haus8</i>                                  | -1,25248116  | 0,00519729 |
| Prp19/ps04 pre-mrna processing factor 19 homolog (s. Cerevisiae)                                                        | <i>Prpf19</i>                                 | -1,251983802 | 0,00512705 |
| Eukaryotic translation initiation factor 2b, subunit 1 (alpha)                                                          | <i>Eif2b1</i>                                 | -1,251833367 | 0,00444548 |
| Glucose 6 phosphatase, catalytic, 3                                                                                     | <i>G6pc3</i>                                  | -1,251797156 | 0,00926959 |
| Tuberous sclerosis 2                                                                                                    | <i>Tsc2</i>                                   | -1,250716052 | 0,00770645 |
| Predicted gene 14680 /// spermine synthase                                                                              | <i>Gm14680 /// sms</i>                        | -1,250360089 | 0,00351588 |
| Menage a trois 1                                                                                                        | <i>Mnat1</i>                                  | -1,248710927 | 0,00733686 |
| High mobility group box transcription factor 1                                                                          | <i>Hbp1</i>                                   | -1,248626157 | 0,0082284  |
| Msh homeobox 2                                                                                                          | <i>Msx2</i>                                   | -1,24815437  | 0,00767055 |
| Regulator of chromosome condensation 1                                                                                  | <i>Rcc1</i>                                   | -1,248018299 | 0,00947937 |
| Ubiquitin-conjugating enzyme e2k                                                                                        | <i>Ube2k</i>                                  | -1,247524969 | 0,00471475 |
| Peptidase d                                                                                                             | <i>Pepd</i>                                   | -1,247106573 | 0,00430021 |
| Wingless-type mmtv integration site family, member 3a                                                                   | <i>Wnt3a</i>                                  | -1,246793106 | 0,00519914 |
| Tubulin folding cofactor b                                                                                              | <i>Tbcb</i>                                   | -1,24661991  | 0,00724938 |
| Dna-directed rna polymerases i, ii, and iii subunit rpabc4-like /// polymerase (rna) ii (dna directed) polypeptide k    | <i>Loc100862456 /// polr2k</i>                | -1,245673032 | 0,00910935 |
| Craniofacial development protein 1                                                                                      | <i>Cfdp1</i>                                  | -1,244202983 | 0,00877622 |
| Defensin, alpha 1 /// defensin, alpha, 24 /// defensin, alpha, 6 /// predicted gene 15284                               | <i>Defa1 /// defa24 /// defa6 /// gm15284</i> | -1,244083276 | 0,00998734 |
| Zinc finger protein 334                                                                                                 | <i>Zfp334</i>                                 | -1,243776629 | 0,00820637 |
| Egl-9 family hypoxia-inducible factor 2                                                                                 | <i>Egln2</i>                                  | -1,243471243 | 0,00827594 |
| Coiled-coil-helix-coiled-coil-helix domain containing 2 /// predicted gene 13202 /// zinc finger, bed-type containing 5 | <i>Chchd2 /// gm13202 /// zbed5</i>           | -1,242588608 | 0,0055019  |
| Ubiquitin-conjugating enzyme e2i                                                                                        | <i>Ube2i</i>                                  | -1,2419851   | 0,00632858 |
| General transcription factor iih, polypeptide 3                                                                         | <i>Gtf2h3</i>                                 | -1,238313393 | 0,00842948 |
| Pr domain containing 4                                                                                                  | <i>Prdm4</i>                                  | -1,238043546 | 0,00887623 |
| Cholinergic receptor, muscarinic 3, cardiac                                                                             | <i>Chrm3</i>                                  | -1,236320986 | 0,00364285 |
| Predicted gene 13826 /// ribosomal protein l37                                                                          | <i>Gm13826 /// rpl37</i>                      | -1,23566714  | 0,00356217 |
| Mitochondrial ribosomal protein l51                                                                                     | <i>Mrpl51</i>                                 | -1,23533522  | 0,00736325 |
| Cklf-like marvel transmembrane domain containing 3                                                                      | <i>Cmtm3</i>                                  | -1,233525254 | 0,00419857 |
| Polypyrimidine tract binding protein 3                                                                                  | <i>Ptbp3</i>                                  | -1,231294014 | 0,00789226 |
| Denn/madd domain containing 5a                                                                                          | <i>Dennd5a</i>                                | -1,230039802 | 0,00442372 |
| Poly-u binding splicing factor 60                                                                                       | <i>Puf60</i>                                  | -1,227596704 | 0,00661854 |
| Adp-ribosylation factor-like 2                                                                                          | <i>Arl2</i>                                   | -1,227415901 | 0,00927264 |
| Protease (prosome, macropain) 26s subunit, atpase 5                                                                     | <i>Psmc5</i>                                  | -1,227123339 | 0,00880016 |
| Transcription elongation regulator 1 (ca150)                                                                            | <i>Tcerg1</i>                                 | -1,226740732 | 0,00503581 |
| Ankyrin repeat, sam and basic leucine zipper domain containing 1                                                        | <i>Asz1</i>                                   | -1,225462021 | 0,00822142 |
| Kallikrein related-peptidase 8                                                                                          | <i>Klk8</i>                                   | -1,223364439 | 0,00910723 |
| Riken cdna 4833439l19 gene                                                                                              | <i>4833439l19rik</i>                          | -1,221033817 | 0,00612549 |
| Wnk lysine deficient protein kinase 4                                                                                   | <i>Wnk4</i>                                   | -1,221006319 | 0,00746155 |



|                                                                                                                                                                  |                                                                      |              |            |
|------------------------------------------------------------------------------------------------------------------------------------------------------------------|----------------------------------------------------------------------|--------------|------------|
| Solute carrier family 25 (mitochondrial carrier, adenine nucleotide translocator), member 5                                                                      | <i>Slc25a5</i>                                                       | -1,220139831 | 0,00605377 |
| Wd repeat domain 13                                                                                                                                              | <i>Wdr13</i>                                                         | -1,214748595 | 0,00740162 |
| Zinc finger protein 626                                                                                                                                          | <i>Zfp626</i>                                                        | -1,21449398  | 0,00756253 |
| Ribosomal protein l8                                                                                                                                             | <i>Rpl8</i>                                                          | -1,213983673 | 0,00487537 |
| Dcp1 decapping enzyme homolog a (s. Cerevisiae)                                                                                                                  | <i>Dcp1a</i>                                                         | -1,212706335 | 0,00953689 |
| Small nucleolar rna host gene 5                                                                                                                                  | <i>Snhg5</i>                                                         | -1,211091976 | 0,00640516 |
| Vacuolar protein sorting 26 homolog b (yeast)                                                                                                                    | <i>Vps26b</i>                                                        | -1,208253187 | 0,0080769  |
| Ribosomal protein l30 pseudogene /// predicted gene 5481 /// predicted gene 6109 /// predicted gene 6570 /// predicted pseudogene 7429 /// ribosomal protein l30 | <i>Gm12191 /// gm5481 /// gm6109 /// gm6570 /// gm7429 /// rpl30</i> | -1,207257227 | 0,00768027 |
| Melanophilin                                                                                                                                                     | <i>Mlph</i>                                                          | -1,205824449 | 0,00962622 |
| Sreb1 chaperone                                                                                                                                                  | <i>Scap</i>                                                          | -1,203876941 | 0,00764528 |

**Table S10. Genes with significantly changed expression in JUN-2fos3 compared to JUN-2**

| Gene.title                                                                                                                                                                                              | Gene.symbol                                                                                             | 2 <sup>^</sup> logFC | adj.p.val |
|---------------------------------------------------------------------------------------------------------------------------------------------------------------------------------------------------------|---------------------------------------------------------------------------------------------------------|----------------------|-----------|
| Stathmin-like 2                                                                                                                                                                                         | <i>Stmn2</i>                                                                                            | 77,2935674           | 1,69e-10  |
| Plasmacytoma expressed transcript 2                                                                                                                                                                     | <i>Pet2</i>                                                                                             | 69,9509256           | 6,55e-10  |
| Calponin 1                                                                                                                                                                                              | <i>Cnn1</i>                                                                                             | 47,9372067           | 1,69e-10  |
| Calcitonin-related polypeptide, beta                                                                                                                                                                    | <i>Calcb</i>                                                                                            | 47,2099442           | 1,14e-10  |
| Small proline-rich protein 2a1 /// small proline-rich protein 2a2                                                                                                                                       | <i>Sprr2a1</i> /// <i>sprr2a2</i>                                                                       | 28,2413931           | 1,69e-10  |
| Developmental pluripotency associated 4                                                                                                                                                                 | <i>Dppa4</i>                                                                                            | 26,805494            | 2,32e-09  |
| Small proline-rich protein 2a1 /// small proline-rich protein 2a2 /// small proline-rich protein 2a3                                                                                                    | <i>Sprr2a1</i> /// <i>sprr2a2</i> /// <i>sprr2a3</i>                                                    | 26,0266498           | 2,88e-10  |
| Solute carrier family 9, subfamily b (nha1, cation proton antiporter 1), member 1                                                                                                                       | <i>Slc9b1</i>                                                                                           | 18,0201168           | 4,21e-10  |
| Melanoma antigen, family a, 1 /// melanoma antigen, family a, 2 /// melanoma antigen, family a, 3 /// melanoma antigen, family a, 5 /// melanoma antigen, family a, 6 /// melanoma antigen, family a, 8 | <i>Magea1</i> /// <i>magea2</i> /// <i>magea3</i> /// <i>magea5</i> /// <i>magea6</i> /// <i>magea8</i> | 17,9026106           | 1,55e-08  |
| Neurofilament, light polypeptide                                                                                                                                                                        | <i>Nefl</i>                                                                                             | 17,2423414           | 1,15e-09  |
| Insulin-like growth factor 2                                                                                                                                                                            | <i>Igf2</i>                                                                                             | 14,8363185           | 2,36e-07  |
| Rab6b, member ras oncogene family                                                                                                                                                                       | <i>Rab6b</i>                                                                                            | 14,21816             | 7,81e-08  |
| Developmental pluripotency associated 2                                                                                                                                                                 | <i>Dppa2</i>                                                                                            | 12,8996917           | 3,39e-09  |
| Forkhead box d1                                                                                                                                                                                         | <i>Foxd1</i>                                                                                            | 12,8372288           | 1,88e-09  |
| Reproductive homeobox 2a /// reproductive homeobox 2e                                                                                                                                                   | <i>Rhox2a</i> /// <i>rhox2e</i>                                                                         | 12,2951675           | 1,39e-08  |
| Acid phosphatase 5, tartrate resistant                                                                                                                                                                  | <i>Acp5</i>                                                                                             | 11,9972844           | 8,50e-09  |
| Lymphocyte antigen 6 complex, locus c1 /// lymphocyte antigen 6 complex, locus c2                                                                                                                       | <i>Ly6c1</i> /// <i>ly6c2</i>                                                                           | 10,9417873           | 6,37e-10  |
| Hemopoietic cell kinase                                                                                                                                                                                 | <i>Hck</i>                                                                                              | 10,6917211           | 6,39e-10  |
| Glutathione s-transferase kappa 1                                                                                                                                                                       | <i>Gstk1</i>                                                                                            | 10,6478852           | 3,57e-09  |
| Alpha fetoprotein                                                                                                                                                                                       | <i>Afp</i>                                                                                              | 10,2930344           | 8,05e-07  |
| Teneurin transmembrane protein 3                                                                                                                                                                        | <i>Tenm3</i>                                                                                            | 10,0738464           | 2,27e-07  |
| Epoxide hydrolase 1, microsomal                                                                                                                                                                         | <i>Ephx1</i>                                                                                            | 10,0113212           | 6,39e-10  |
| Gap junction protein, beta 5                                                                                                                                                                            | <i>Gjb5</i>                                                                                             | 9,4008104            | 2,72e-08  |
| Myosin viib                                                                                                                                                                                             | <i>Myo7b</i>                                                                                            | 8,98880198           | 1,37e-07  |
| Scm-like with four mbt domains 2                                                                                                                                                                        | <i>Sfmbt2</i>                                                                                           | 8,68269695           | 6,08e-08  |
| Small proline-rich protein 2f                                                                                                                                                                           | <i>Sprr2f</i>                                                                                           | 8,57157781           | 1,44e-09  |
| Chemokine (c-x-c motif) receptor 6                                                                                                                                                                      | <i>Cxcr6</i>                                                                                            | 8,37785616           | 4,31e-07  |
| Carboxymethylenebutenolidase-like (pseudomonas)                                                                                                                                                         | <i>Cmb1</i>                                                                                             | 8,11059288           | 7,87e-09  |
| Tetraspanin 2                                                                                                                                                                                           | <i>Tspan2</i>                                                                                           | 7,72638388           | 2,52e-06  |
| Lysozyme 1                                                                                                                                                                                              | <i>Lyz1</i>                                                                                             | 7,69294233           | 1,20e-08  |
| Sema domain, immunoglobulin domain (ig), short basic domain, secreted, (semaphorin) 3a                                                                                                                  | <i>Sema3a</i>                                                                                           | 7,68063391           | 9,31e-09  |
| Sry (sex determining region y)-box 2                                                                                                                                                                    | <i>Sox2</i>                                                                                             | 7,25141769           | 2,12e-09  |
| Atpase, ca++ transporting, type 2c, member 2                                                                                                                                                            | <i>Atp2c2</i>                                                                                           | 7,04356126           | 1,50e-07  |
| Myosin vc                                                                                                                                                                                               | <i>Myo5c</i>                                                                                            | 7,00020011           | 3,06e-07  |
| Keratin 13                                                                                                                                                                                              | <i>Krt13</i>                                                                                            | 6,89409544           | 9,22e-08  |
| Lymphocyte antigen 6 complex, locus a                                                                                                                                                                   | <i>Ly6a</i>                                                                                             | 6,83471808           | 6,55e-10  |
| Premature ovarian failure 1b                                                                                                                                                                            | <i>Pof1b</i>                                                                                            | 6,7664017            | 3,06e-08  |

|                                                                                                                                                                                                                                                                                                                                                                                                                                                                                     |                                                                                                                                                                                                                                                                                                                                                                                     |            |          |
|-------------------------------------------------------------------------------------------------------------------------------------------------------------------------------------------------------------------------------------------------------------------------------------------------------------------------------------------------------------------------------------------------------------------------------------------------------------------------------------|-------------------------------------------------------------------------------------------------------------------------------------------------------------------------------------------------------------------------------------------------------------------------------------------------------------------------------------------------------------------------------------|------------|----------|
| Insulin-like growth factor binding protein 4                                                                                                                                                                                                                                                                                                                                                                                                                                        | <i>Igfbp4</i>                                                                                                                                                                                                                                                                                                                                                                       | 6,73256183 | 2,91e-08 |
| Protein tyrosine phosphatase, non-receptor type 20                                                                                                                                                                                                                                                                                                                                                                                                                                  | <i>Ptpn20</i>                                                                                                                                                                                                                                                                                                                                                                       | 6,72901101 | 2,74e-07 |
| Ankyrin repeat and socs box-containing 17                                                                                                                                                                                                                                                                                                                                                                                                                                           | <i>Asb17</i>                                                                                                                                                                                                                                                                                                                                                                        | 6,6353602  | 1,44e-09 |
| Cd80 antigen                                                                                                                                                                                                                                                                                                                                                                                                                                                                        | <i>Cd80</i>                                                                                                                                                                                                                                                                                                                                                                         | 6,6333538  | 1,18e-08 |
| Predicted gene 10439 /// predicted gene 15080 ///<br>predicted gene 15085 /// predicted gene 15093 ///<br>predicted gene 15107 /// predicted gene 15114 ///<br>predicted gene 15128 /// leucine zipper protein 4 ///<br>ovary testis transcribed                                                                                                                                                                                                                                    | <i>Gm10439</i> ///<br><i>gm15080</i> ///<br><i>gm15085</i> ///<br><i>gm15093</i> ///<br><i>gm15107</i> ///<br><i>gm15114</i> ///<br><i>gm15128</i> /// <i>luzp4</i><br>/// <i>ott</i>                                                                                                                                                                                               | 6,62776383 | 2,63e-06 |
| Matrilin 2                                                                                                                                                                                                                                                                                                                                                                                                                                                                          | <i>Matn2</i>                                                                                                                                                                                                                                                                                                                                                                        | 6,50760295 | 7,28e-09 |
| Keratin associated protein 4-16                                                                                                                                                                                                                                                                                                                                                                                                                                                     | <i>Krtap4-16</i>                                                                                                                                                                                                                                                                                                                                                                    | 6,48960376 | 5,05e-08 |
| C-fos induced growth factor                                                                                                                                                                                                                                                                                                                                                                                                                                                         | <i>Figf</i>                                                                                                                                                                                                                                                                                                                                                                         | 6,44100772 | 3,11e-08 |
| Endothelial cell-specific molecule 1                                                                                                                                                                                                                                                                                                                                                                                                                                                | <i>Esm1</i>                                                                                                                                                                                                                                                                                                                                                                         | 6,24575694 | 4,57e-08 |
| Myosin vb                                                                                                                                                                                                                                                                                                                                                                                                                                                                           | <i>Myo5b</i>                                                                                                                                                                                                                                                                                                                                                                        | 6,11135457 | 1,62e-07 |
| Fragile x mental retardation 1 neighbor                                                                                                                                                                                                                                                                                                                                                                                                                                             | <i>Fmr1nb</i>                                                                                                                                                                                                                                                                                                                                                                       | 5,95906853 | 1,56e-08 |
| Otospiralin                                                                                                                                                                                                                                                                                                                                                                                                                                                                         | <i>Otos</i>                                                                                                                                                                                                                                                                                                                                                                         | 5,94254142 | 4,52e-07 |
| Spindle and kinetochore associated complex subunit 1                                                                                                                                                                                                                                                                                                                                                                                                                                | <i>Ska1</i>                                                                                                                                                                                                                                                                                                                                                                         | 5,81585493 | 1,24e-08 |
| Regulator of g-protein signaling 2                                                                                                                                                                                                                                                                                                                                                                                                                                                  | <i>Rgs2</i>                                                                                                                                                                                                                                                                                                                                                                         | 5,7749453  | 9,42e-08 |
| Paired immunoglobulin-like type 2 receptor alpha                                                                                                                                                                                                                                                                                                                                                                                                                                    | <i>Pilra</i>                                                                                                                                                                                                                                                                                                                                                                        | 5,63447953 | 1,86e-07 |
| Lim and senescent cell antigen like domains 2                                                                                                                                                                                                                                                                                                                                                                                                                                       | <i>Lims2</i>                                                                                                                                                                                                                                                                                                                                                                        | 5,56254091 | 2,72e-07 |
| Potassium voltage-gated channel, shaker-related<br>subfamily, beta member 1                                                                                                                                                                                                                                                                                                                                                                                                         | <i>Kcnab1</i>                                                                                                                                                                                                                                                                                                                                                                       | 5,45425744 | 3,10e-07 |
| Cd244 natural killer cell receptor 2b4                                                                                                                                                                                                                                                                                                                                                                                                                                              | <i>Cd244</i>                                                                                                                                                                                                                                                                                                                                                                        | 5,40936762 | 9,13e-06 |
| Predicted gene 10058 /// predicted gene 10096 ///<br>predicted gene 10147 /// predicted gene 10230 ///<br>predicted gene 10486 /// predicted gene 10487 ///<br>predicted gene 10488 /// predicted gene 14525 ///<br>predicted gene 14632 /// predicted gene 14819 ///<br>predicted pseudogene 2005 /// predicted gene 2012 ///<br>predicted gene 2030 /// predicted gene 4297 ///<br>predicted gene 4836 /// predicted gene 5169 ///<br>predicted gene 5934 /// predicted gene 6121 | <i>Gm10058</i> ///<br><i>gm10096</i> ///<br><i>gm10147</i> ///<br><i>gm10230</i> ///<br><i>gm10486</i> ///<br><i>gm10487</i> ///<br><i>gm10488</i> ///<br><i>gm14525</i> ///<br><i>gm14632</i> ///<br><i>gm14819</i> /// <i>gm2005</i><br>/// <i>gm2012</i> ///<br><i>gm2030</i> /// <i>gm4297</i><br>/// <i>gm4836</i> ///<br><i>gm5169</i> /// <i>gm5934</i><br>/// <i>gm6121</i> | 5,36983152 | 9,08e-09 |
| Carbohydrate sulfotransferase 11 /// phosphatase and<br>actin regulator 1                                                                                                                                                                                                                                                                                                                                                                                                           | <i>Chst11</i> /// <i>phactr1</i>                                                                                                                                                                                                                                                                                                                                                    | 5,24907438 | 3,44e-08 |
| Collagen, type vi, alpha 3                                                                                                                                                                                                                                                                                                                                                                                                                                                          | <i>Col6a3</i>                                                                                                                                                                                                                                                                                                                                                                       | 5,24569248 | 8,53e-09 |
| Arrestin, beta 1                                                                                                                                                                                                                                                                                                                                                                                                                                                                    | <i>Arrb1</i>                                                                                                                                                                                                                                                                                                                                                                        | 5,17232705 | 7,41e-08 |
| Formin homology 2 domain containing 3                                                                                                                                                                                                                                                                                                                                                                                                                                               | <i>Fhod3</i>                                                                                                                                                                                                                                                                                                                                                                        | 5,1617969  | 1,52e-08 |
| Family with sequence similarity 198, member b                                                                                                                                                                                                                                                                                                                                                                                                                                       | <i>Fam198b</i>                                                                                                                                                                                                                                                                                                                                                                      | 5,12417057 | 4,86e-07 |
| Chromodomain helicase dna binding protein 3,<br>opposite strand                                                                                                                                                                                                                                                                                                                                                                                                                     | <i>Chd3os</i>                                                                                                                                                                                                                                                                                                                                                                       | 5,10009649 | 6,72e-07 |
| Neuropeptide y receptor y1                                                                                                                                                                                                                                                                                                                                                                                                                                                          | <i>Npy1r</i>                                                                                                                                                                                                                                                                                                                                                                        | 5,08969923 | 2,04e-08 |
| Family with sequence similarity 84, member a                                                                                                                                                                                                                                                                                                                                                                                                                                        | <i>Fam84a</i>                                                                                                                                                                                                                                                                                                                                                                       | 5,08187561 | 4,71e-07 |

|                                                                        |                      |            |            |
|------------------------------------------------------------------------|----------------------|------------|------------|
| Transglutaminase 2, c polypeptide                                      | <i>Tgm2</i>          | 5,04569562 | 5,45e-08   |
| Chemokine (c-c motif) ligand 2                                         | <i>Ccl2</i>          | 4,99294583 | 1,78e-07   |
| Chemokine (c-c motif) ligand 7                                         | <i>Ccl7</i>          | 4,96727777 | 4,60e-06   |
| Microtubule-associated protein 6                                       | <i>Map6</i>          | 4,91216722 | 1,54e-08   |
| Synaptopodin                                                           | <i>Synpo</i>         | 4,84167084 | 5,89e-09   |
| Gli pathogenesis-related 1 (glioma)                                    | <i>Glipr1</i>        | 4,80686902 | 1,76e-08   |
| Calponin 2                                                             | <i>Cnn2</i>          | 4,79337664 | 6,19e-08   |
| Isochorismatase domain containing 1                                    | <i>Isoc1</i>         | 4,75479086 | 7,28e-09   |
| Tlc domain containing 2                                                | <i>Tlcd2</i>         | 4,68534585 | 1,51e-08   |
| Collagen, type iv, alpha 5                                             | <i>Col4a5</i>        | 4,63382488 | 5,19e-07   |
| Histocompatibility 2, m region locus 9                                 | <i>H2-m9</i>         | 4,61605491 | 2,86e-08   |
| Thrombomodulin                                                         | <i>Thbd</i>          | 4,60836247 | 1,92e-05   |
| Fragile histidine triad gene                                           | <i>Fhit</i>          | 4,59136186 | 4,27e-06   |
| Actin, alpha 1, skeletal muscle                                        | <i>Acta1</i>         | 4,51696006 | 6,24e-08   |
| Follistatin-like 3                                                     | <i>Fstl3</i>         | 4,47615208 | 6,17e-08   |
| Ribonuclease p/mrp 25 subunit                                          | <i>Rpp25</i>         | 4,46950604 | 3,14e-06   |
| Cytochrome p450, family 2, subfamily d, polypeptide 22                 | <i>Cyp2d22</i>       | 4,40019085 | 3,06e-08   |
| Transmembrane protein with egf-like and two follistatin-like domains 2 | <i>Tmeff2</i>        | 4,37016455 | 1,00e-07   |
| Melanoma antigen, family a, 5                                          | <i>Magea5</i>        | 4,36851646 | 3,98e-07   |
| Retinol dehydrogenase 5                                                | <i>Rdh5</i>          | 4,33460162 | 8,05e-08   |
| Cubilin (intrinsic factor-cobalamin receptor)                          | <i>Cubn</i>          | 4,31465912 | 1,41e-07   |
| Chemokine (c-c motif) ligand 11                                        | <i>Ccl11</i>         | 4,3079159  | 2,84e-07   |
| Gata binding protein 6                                                 | <i>Gata6</i>         | 4,30522872 | 2,23e-07   |
| Protein kinase c, delta binding protein                                | <i>Prkcdbp</i>       | 4,27037297 | 2,71e-08   |
| Dna-damage-inducible transcript 4-like                                 | <i>Ddit4l</i>        | 4,26784707 | 6,63e-08   |
| Transgelin                                                             | <i>Tagln</i>         | 4,21718471 | 7,55e-08   |
| Kallikrein related-peptidase 7 (chymotryptic, stratum corneum)         | <i>Klk7</i>          | 4,18382851 | 3,20e-06   |
| Ras homolog gene family, member j                                      | <i>Rhoj</i>          | 4,18123079 | 9,16e-09   |
| Msh homeobox 3                                                         | <i>Msx3</i>          | 4,17746376 | 3,75e-08   |
| Protein kinase, cgmp-dependent, type ii                                | <i>Prkg2</i>         | 4,17653842 | 1,04e-07   |
| Gene regulated by estrogen in breast cancer protein                    | <i>Greb1</i>         | 4,10330019 | 2,56e-06   |
| Guanylate cyclase activator 2a (guanylin)                              | <i>Guca2a</i>        | 4,09926161 | 2,98e-06   |
| Adrenergic receptor, alpha 1b                                          | <i>Adra1b</i>        | 4,08247324 | 5,25e-07   |
| Solute carrier family 26 (sulfate transporter), member 2               | <i>Slc26a2</i>       | 4,05840145 | 1,73e-07   |
| 3'-phosphoadenosine 5'-phosphosulfate synthase 2                       | <i>Papss2</i>        | 4,05440137 | 5,93e-08   |
| Chemokine (c-c motif) ligand 8                                         | <i>Ccl8</i>          | 4,04350509 | 3,28e-08   |
| Aldehyde dehydrogenase family 1, subfamily a3                          | <i>Aldh1a3</i>       | 4,03965569 | 1,54e-07   |
| Insulin-like growth factor binding protein 6                           | <i>Igfbp6</i>        | 4,02098359 | 1,01e-07   |
| Riken cdna 4930529m08 gene                                             | <i>4930529m08rik</i> | 4,02090185 | 0,00016329 |
| Rab27b, member ras oncogene family                                     | <i>Rab27b</i>        | 4,00072293 | 2,31e-06   |
| Rho gtpase activating protein 18                                       | <i>Arhgap18</i>      | 3,99309386 | 1,62e-07   |
| Steroidogenic acute regulatory protein                                 | <i>Star</i>          | 3,96128261 | 7,05e-08   |
| Dysferlin                                                              | <i>Dysf</i>          | 3,91226553 | 7,69e-08   |

|                                                                                                                                             |                  |            |            |
|---------------------------------------------------------------------------------------------------------------------------------------------|------------------|------------|------------|
| Macro domain containing 2                                                                                                                   | <i>Macro2</i>    | 3,90662556 | 3,65e-07   |
| Cytochrome b-561                                                                                                                            | <i>Cyb561</i>    | 3,89502764 | 2,73e-07   |
| Inhibitor of dna binding 3                                                                                                                  | <i>Id3</i>       | 3,8939997  | 1,23e-08   |
| G1 to s phase transition 2                                                                                                                  | <i>Gspt2</i>     | 3,89064542 | 2,90e-07   |
| Colony stimulating factor 1 receptor                                                                                                        | <i>Csf1r</i>     | 3,88367657 | 1,42e-07   |
| Poly(rc) binding protein 3                                                                                                                  | <i>Pcbp3</i>     | 3,87982807 | 1,28e-06   |
| Carboxypeptidase z                                                                                                                          | <i>Cpz</i>       | 3,86420138 | 1,67e-06   |
| Guanylate binding protein 3                                                                                                                 | <i>Gbp3</i>      | 3,83727286 | 7,69e-07   |
| Sema domain, seven thrombospondin repeats (type 1 and type 1-like), transmembrane domain (tm) and short cytoplasmic domain, (semaphorin) 5a | <i>Sema5a</i>    | 3,82595482 | 7,78e-08   |
| Protein tyrosine phosphatase-like a domain containing 2                                                                                     | <i>Ptplad2</i>   | 3,81842052 | 1,17e-07   |
| Cyclin g1                                                                                                                                   | <i>Ccng1</i>     | 3,81011495 | 0,00016818 |
| Spleen tyrosine kinase                                                                                                                      | <i>Syk</i>       | 3,80431897 | 1,73e-06   |
| Dystrobrevin alpha                                                                                                                          | <i>Dtna</i>      | 3,78879385 | 6,74e-07   |
| Fyn-related kinase                                                                                                                          | <i>Frk</i>       | 3,77721322 | 3,66e-05   |
| Advillin                                                                                                                                    | <i>Avil</i>      | 3,77604855 | 4,20e-07   |
| Potassium intermediate/small conductance calcium-activated channel, subfamily n, member 2                                                   | <i>Kcnn2</i>     | 3,77245096 | 1,09e-06   |
| Betacellulin, epidermal growth factor family member                                                                                         | <i>Btc</i>       | 3,74665178 | 1,00e-07   |
| Serine (or cysteine) peptidase inhibitor, clade b, member 1a                                                                                | <i>Serpinb1a</i> | 3,71143639 | 1,89e-07   |
| Melanoma antigen, family a, 6                                                                                                               | <i>Magea6</i>    | 3,70808239 | 8,69e-07   |
| Cytochrome b5 reductase 3                                                                                                                   | <i>Cyb5r3</i>    | 3,6968487  | 3,65e-07   |
| Dnaj (hsp40) homolog, subfamily a, member 4                                                                                                 | <i>Dnaja4</i>    | 3,68232177 | 1,81e-06   |
| Sperm antigen with calponin homology and coiled-coil domains 1                                                                              | <i>Specc1</i>    | 3,63527272 | 5,88e-08   |
| Pleckstrin homology domain containing, family a (phosphoinositide binding specific) member 1                                                | <i>Plekha1</i>   | 3,63360656 | 1,92e-08   |
| Dynamin 1                                                                                                                                   | <i>Dnm1</i>      | 3,61521611 | 8,63e-07   |
| Cd109 antigen                                                                                                                               | <i>Cd109</i>     | 3,61099852 | 3,05e-07   |
| Reproductive homeobox 5                                                                                                                     | <i>Rhox5</i>     | 3,56740688 | 1,83e-07   |
| Star-related lipid transfer (start) domain containing 4                                                                                     | <i>Stard4</i>    | 3,56355674 | 1,55e-06   |
| Rab3d, member ras oncogene family                                                                                                           | <i>Rab3d</i>     | 3,55104863 | 4,32e-06   |
| Udp-gal:betaglcnac beta 1,3-galactosyltransferase, polypeptide 1                                                                            | <i>B3galt1</i>   | 3,51742927 | 1,97e-06   |
| Doublecortin-like kinase 1                                                                                                                  | <i>Dclk1</i>     | 3,49617264 | 5,26e-07   |
| Arylsulfatase i                                                                                                                             | <i>Arsi</i>      | 3,4882318  | 1,35e-07   |
| Lim domain binding 3                                                                                                                        | <i>Ldb3</i>      | 3,48557085 | 2,14e-06   |
| Phosphofructokinase, liver, b-type                                                                                                          | <i>Pfkl</i>      | 3,48279138 | 0,00086227 |
| Tumor necrosis factor receptor superfamily, member 9                                                                                        | <i>Tnfrsf9</i>   | 3,48034844 | 6,67e-08   |
| D-dopachrome tautomerase                                                                                                                    | <i>Ddt</i>       | 3,47383247 | 1,18e-07   |
| Max dimerization protein 3                                                                                                                  | <i>Mxd3</i>      | 3,46411394 | 1,22e-07   |
| Insulin-like growth factor 2 mrna binding protein 1                                                                                         | <i>Igf2bp1</i>   | 3,46092006 | 6,20e-07   |
| Chloride channel calcium activated 4                                                                                                        | <i>Clca4</i>     | 3,45929447 | 0,00022698 |

|                                                                                                                                                               |                                                |            |            |
|---------------------------------------------------------------------------------------------------------------------------------------------------------------|------------------------------------------------|------------|------------|
| Predicted gene 7040 /// prolactin family 2, subfamily c, member 2 /// prolactin family 2, subfamily c, member 3 /// prolactin family 2, subfamily c, member 4 | <i>Gm7040 /// prl2c2 /// prl2c3 /// prl2c4</i> | 3,43330158 | 1,68e-08   |
| Neurofilament, medium polypeptide                                                                                                                             | <i>Nefm</i>                                    | 3,43248482 | 6,51e-07   |
| Pyridoxal (pyridoxine, vitamin b6) phosphatase                                                                                                                | <i>Pdxp</i>                                    | 3,42989515 | 7,46e-08   |
| Tubulin polyglutamylase complex subunit 2                                                                                                                     | <i>Tpgs2</i>                                   | 3,4253748  | 2,16e-08   |
| Selenoprotein p, plasma, 1                                                                                                                                    | <i>Sepp1</i>                                   | 3,41983052 | 1,86e-07   |
| Methyltransferase like 7a1                                                                                                                                    | <i>Mettl7a1</i>                                | 3,41058335 | 2,61e-07   |
| Ropporin 1-like                                                                                                                                               | <i>Ropn1l</i>                                  | 3,3994532  | 7,35e-06   |
| Camp responsive element modulator                                                                                                                             | <i>Crem</i>                                    | 3,39311098 | 9,83e-06   |
| Immunoglobulin superfamily, member 5                                                                                                                          | <i>Igsf5</i>                                   | 3,35978771 | 0,00010537 |
| Cd48 antigen                                                                                                                                                  | <i>Cd48</i>                                    | 3,35059823 | 5,35e-07   |
| Serine (or cysteine) peptidase inhibitor, clade b, member 8                                                                                                   | <i>Serpinb8</i>                                | 3,34837404 | 3,62e-05   |
| Transmembrane protein 158                                                                                                                                     | <i>Tmem158</i>                                 | 3,3482845  | 6,63e-08   |
| Predicted gene 3716                                                                                                                                           | <i>Gm3716</i>                                  | 3,32956205 | 5,69e-07   |
| Carboxypeptidase x 2 (m14 family)                                                                                                                             | <i>Cpxm2</i>                                   | 3,32679593 | 2,02e-05   |
| Acylphosphatase 2, muscle type                                                                                                                                | <i>Acyp2</i>                                   | 3,32590682 | 6,48e-06   |
| Collagen, type iv, alpha 6                                                                                                                                    | <i>Col4a6</i>                                  | 3,31809745 | 0,00012009 |
| Prickle homolog 1 (drosophila)                                                                                                                                | <i>Prickle1</i>                                | 3,31138708 | 3,72e-07   |
| Gipc pdz domain containing family, member 2                                                                                                                   | <i>Gipc2</i>                                   | 3,30076635 | 7,12e-07   |
| Fibrinogen-like protein 2                                                                                                                                     | <i>Fgl2</i>                                    | 3,29096894 | 3,90e-06   |
| Meiosis-specific nuclear structural protein 1                                                                                                                 | <i>Mns1</i>                                    | 3,2900455  | 1,21e-07   |
| Ww, c2 and coiled-coil domain containing 1                                                                                                                    | <i>Wwc1</i>                                    | 3,25322111 | 4,69e-06   |
| Adenylosuccinate synthetase like 1                                                                                                                            | <i>Adssl1</i>                                  | 3,23673581 | 1,00e-07   |
| Cd244 natural killer cell receptor 2b4 /// natural killer cell receptor 2b4-like                                                                              | <i>Cd244 /// loc677008</i>                     | 3,23493633 | 1,12e-05   |
| Microtubule-associated protein 1b                                                                                                                             | <i>Map1b</i>                                   | 3,22297803 | 2,20e-05   |
| Olfactomedin-like 3                                                                                                                                           | <i>Olfml3</i>                                  | 3,20081977 | 1,25e-07   |
| Transforming growth factor, beta induced                                                                                                                      | <i>Tgfb1</i>                                   | 3,18321938 | 8,83e-08   |
| Dicarbonyl l-xylulose reductase                                                                                                                               | <i>Dcxr</i>                                    | 3,17930365 | 3,53e-07   |
| Phosphofructokinase, platelet                                                                                                                                 | <i>Pfkip</i>                                   | 3,17720959 | 2,83e-05   |
| Testis derived transcript                                                                                                                                     | <i>Tes</i>                                     | 3,17587508 | 2,59e-08   |
| Isopentenyl-diphosphate delta isomerase                                                                                                                       | <i>Idi1</i>                                    | 3,16953242 | 2,36e-07   |
| Solute carrier family 8 (sodium/calcium exchanger), member 1                                                                                                  | <i>Slc8a1</i>                                  | 3,16802676 | 4,68e-06   |
| Pannexin 1                                                                                                                                                    | <i>Panx1</i>                                   | 3,16493846 | 4,85e-08   |
| Abhydrolase domain containing 3                                                                                                                               | <i>Abhd3</i>                                   | 3,15141233 | 0,00010614 |
| Opticin                                                                                                                                                       | <i>Optc</i>                                    | 3,14841509 | 1,88e-07   |
| Phosphatase and actin regulator 1                                                                                                                             | <i>Phactr1</i>                                 | 3,14163175 | 5,89e-06   |
| Riken cDNA 9030617o03 gene                                                                                                                                    | <i>9030617o03rik</i>                           | 3,14100017 | 5,19e-07   |
| Plakophilin 3                                                                                                                                                 | <i>Pkip3</i>                                   | 3,13874952 | 1,24e-06   |
| Progressive ankylosis                                                                                                                                         | <i>Ank</i>                                     | 3,13873064 | 1,86e-07   |
| Receptor accessory protein 5                                                                                                                                  | <i>Reep5</i>                                   | 3,12681332 | 0,00147998 |
| Cyclin-dependent kinase inhibitor 1a (p21)                                                                                                                    | <i>Cdkn1a</i>                                  | 3,12326867 | 2,01e-05   |
| A disintegrin and metalloproteinase domain 8                                                                                                                  | <i>Adam8</i>                                   | 3,10931671 | 3,07e-07   |

|                                                                             |                                        |            |            |
|-----------------------------------------------------------------------------|----------------------------------------|------------|------------|
| Coiled-coil domain containing 104                                           | <i>Ccdc104</i>                         | 3,08333823 | 3,00e-07   |
| Neural precursor cell expressed, developmentally down-regulated gene 4-like | <i>Neddd4l</i>                         | 3,07976274 | 3,31e-08   |
| Solute carrier organic anion transporter family, member 2a1                 | <i>Slco2a1</i>                         | 3,06126712 | 8,60e-07   |
| Glutamate receptor interacting protein 1                                    | <i>Grip1</i>                           | 3,05532238 | 6,71e-06   |
| Transmembrane protein 141                                                   | <i>Tmem141</i>                         | 3,05098236 | 8,54e-08   |
| Cysteine conjugate-beta lyase 2                                             | <i>Ccbl2</i>                           | 3,05030969 | 4,97e-06   |
| Impact, rwd domain protein                                                  | <i>Impact</i>                          | 3,03609358 | 2,07e-07   |
| Adrenomedullin                                                              | <i>Adm</i>                             | 3,01009944 | 5,09e-06   |
| Glycophorin c                                                               | <i>Gypc</i>                            | 3,00466801 | 3,16e-07   |
| Solute carrier family 39 (metal ion transporter), member 8                  | <i>Slc39a8</i>                         | 2,98146393 | 0,00126306 |
| Cyclin d1                                                                   | <i>Ccnd1</i>                           | 2,98027022 | 4,39e-07   |
| Lim domain only 1                                                           | <i>Lmo1</i>                            | 2,97606148 | 4,66e-07   |
| Sulfatase 2                                                                 | <i>Sulf2</i>                           | 2,96798434 | 5,26e-07   |
| Leucine-rich repeat kinase 2                                                | <i>Lrrk2</i>                           | 2,96041702 | 6,13e-07   |
| Sclerostin domain containing 1                                              | <i>Sostdc1</i>                         | 2,95847526 | 5,98e-06   |
| Phosphodiesterase 1b, ca2+-calmodulin dependent                             | <i>Pde1b</i>                           | 2,95592457 | 6,98e-06   |
| Myeloma overexpressed 2                                                     | <i>Myeov2</i>                          | 2,95525738 | 3,07e-07   |
| Cadherin 17                                                                 | <i>Cdh17</i>                           | 2,95343809 | 5,76e-07   |
| Pdz and lim domain 2                                                        | <i>Pdlim2</i>                          | 2,94193504 | 5,14e-07   |
| Kinesin family member 20a                                                   | <i>Kif20a</i>                          | 2,94168858 | 4,29e-06   |
| Sulfiredoxin 1 homolog (s. Cerevisiae)                                      | <i>Srxn1</i>                           | 2,94093531 | 2,63e-06   |
| Clathrin, light polypeptide (lcb)                                           | <i>Cltb</i>                            | 2,93727836 | 1,41e-07   |
| Tumor necrosis factor (ligand) superfamily, member 13b                      | <i>Tnfsf13b</i>                        | 2,93625296 | 9,27e-07   |
| Tripartite motif-containing 24                                              | <i>Trim24</i>                          | 2,93531803 | 6,59e-07   |
| Histidine triad nucleotide binding protein 3                                | <i>Hint3</i>                           | 2,92981691 | 1,17e-06   |
| Methyltransferase like 7a1 /// methyltransferase like 7a2                   | <i>Mettl7a1</i> ///<br><i>mettl7a2</i> | 2,91432958 | 1,76e-06   |
| Mitogen-activated protein kinase kinase kinase 5                            | <i>Map3k5</i>                          | 2,90721983 | 1,69e-06   |
| Protocadherin 10                                                            | <i>Pcdh10</i>                          | 2,89625611 | 7,84e-05   |
| G protein-coupled receptor 19                                               | <i>Gpr19</i>                           | 2,88837043 | 1,47e-05   |
| Retinoic acid receptor, beta                                                | <i>Rarb</i>                            | 2,87197579 | 2,44e-05   |
| Angiopoietin 2                                                              | <i>Angpt2</i>                          | 2,86469058 | 9,22e-08   |
| Lysozyme 2                                                                  | <i>Lyz2</i>                            | 2,86417416 | 2,69e-06   |
| Glutathione peroxidase 3                                                    | <i>Gpx3</i>                            | 2,85329516 | 1,11e-05   |
| Serine (or cysteine) peptidase inhibitor, clade a, member 3n                | <i>Serpina3n</i>                       | 2,84787122 | 8,23e-06   |
| Star-related lipid transfer (start) domain containing 6                     | <i>Stard6</i>                          | 2,84581344 | 9,71e-08   |
| Amino-terminal enhancer of split                                            | <i>Aes</i>                             | 2,84202276 | 0,00171179 |
| Family with sequence similarity 13, member c                                | <i>Fam13c</i>                          | 2,84074793 | 6,72e-06   |
| Dynamin 3, opposite strand /// microrna 214                                 | <i>Dnm3os</i> /// <i>mir214</i>        | 2,83193069 | 1,93e-07   |
| Myozenin 2                                                                  | <i>Myoz2</i>                           | 2,83008062 | 4,76e-07   |
| Brain and acute leukemia, cytoplasmic                                       | <i>Baalc</i>                           | 2,82741122 | 2,69e-07   |
| Rab32, member ras oncogene family                                           | <i>Rab32</i>                           | 2,82645274 | 1,59e-06   |

|                                                                                                                                                                                     |                                                                    |            |            |
|-------------------------------------------------------------------------------------------------------------------------------------------------------------------------------------|--------------------------------------------------------------------|------------|------------|
| Cysteine-rich protein 1 (intestinal)                                                                                                                                                | <i>Crip1</i>                                                       | 2,81277695 | 2,78e-06   |
| Guanine nucleotide binding protein, alpha 13                                                                                                                                        | <i>Gna13</i>                                                       | 2,81097323 | 4,91e-07   |
| Family with sequence similarity 101, member b                                                                                                                                       | <i>Fam101b</i>                                                     | 2,81035853 | 4,26e-07   |
| Synaptotagmin xiii                                                                                                                                                                  | <i>Syt13</i>                                                       | 2,79397503 | 2,04e-06   |
| Growth factor receptor bound protein 2-associated protein 3                                                                                                                         | <i>Gab3</i>                                                        | 2,78851271 | 1,56e-06   |
| Prostaglandin e receptor 4 (subtype ep4)                                                                                                                                            | <i>Ptger4</i>                                                      | 2,78460759 | 3,31e-05   |
| Protein kinase inhibitor, alpha                                                                                                                                                     | <i>Pkia</i>                                                        | 2,77370021 | 0,00438091 |
| Death-associated protein                                                                                                                                                            | <i>Dap</i>                                                         | 2,77066093 | 1,36e-07   |
| S100 calcium binding protein a4                                                                                                                                                     | <i>S100a4</i>                                                      | 2,76514531 | 1,90e-07   |
| Aldehyde dehydrogenase 1 family, member l1                                                                                                                                          | <i>Aldh1l1</i>                                                     | 2,76444691 | 2,59e-07   |
| Hexokinase 1                                                                                                                                                                        | <i>Hk1</i>                                                         | 2,7609865  | 0,0003993  |
| Guanine nucleotide binding protein (g protein), alpha inhibiting 1                                                                                                                  | <i>Gnai1</i>                                                       | 2,75406997 | 1,01e-05   |
| Neuron navigator 2                                                                                                                                                                  | <i>Nav2</i>                                                        | 2,74895998 | 1,63e-05   |
| Chimerin 2                                                                                                                                                                          | <i>Chn2</i>                                                        | 2,74543399 | 8,48e-06   |
| Carbonic anhydrase 9                                                                                                                                                                | <i>Car9</i>                                                        | 2,7346463  | 3,04e-05   |
| Serum/glucocorticoid regulated kinase 1                                                                                                                                             | <i>Sgk1</i>                                                        | 2,73375367 | 1,41e-05   |
| Glutathione s-transferase, mu 2                                                                                                                                                     | <i>Gstm2</i>                                                       | 2,72862323 | 2,19e-07   |
| Lim homeobox protein 6                                                                                                                                                              | <i>Lhx6</i>                                                        | 2,72760034 | 3,47e-05   |
| Microtubule-associated protein, rp/eb family, member 2                                                                                                                              | <i>Mapre2</i>                                                      | 2,72567256 | 7,23e-05   |
| Hepatic leukemia factor                                                                                                                                                             | <i>Hlf</i>                                                         | 2,72061269 | 9,50e-05   |
| Predicted gene 13305 /// predicted gene 2002 /// interleukin 11 receptor, alpha chain 1 /// interleukin 11 receptor, alpha chain 2 /// interleukin-11 receptor subunit alpha-2-like | <i>Gm13305 /// gm2002 /// il11ra1 /// il11ra2 /// loc100861969</i> | 2,70922006 | 6,12e-07   |
| Htra serine peptidase 3                                                                                                                                                             | <i>Htra3</i>                                                       | 2,70785081 | 4,04e-06   |
| Citrate lyase beta like                                                                                                                                                             | <i>Clybl</i>                                                       | 2,70409377 | 9,54e-05   |
| Calcium channel, voltage-dependent, gamma subunit 6                                                                                                                                 | <i>Cacng6</i>                                                      | 2,70051938 | 5,18e-06   |
| Zw10 interactor                                                                                                                                                                     | <i>Zwint</i>                                                       | 2,69137309 | 1,23e-07   |
| Cytidine deaminase                                                                                                                                                                  | <i>Cda</i>                                                         | 2,68919926 | 3,76e-07   |
| Sodium channel, voltage-gated, type ii, alpha 1                                                                                                                                     | <i>Scn2a1</i>                                                      | 2,67958003 | 5,27e-05   |
| Adp-ribosylation factor gtpase activating protein 3                                                                                                                                 | <i>Arfgap3</i>                                                     | 2,67763872 | 2,36e-07   |
| Glutathione s-transferase, theta 2                                                                                                                                                  | <i>Gstt2</i>                                                       | 2,67684826 | 3,42e-05   |
| Aspartoacylase                                                                                                                                                                      | <i>Aspa</i>                                                        | 2,67462108 | 6,29e-07   |
| Sprouty homolog 2 (drosophila)                                                                                                                                                      | <i>Spry2</i>                                                       | 2,67402323 | 4,60e-06   |
| Acetyl-coenzyme a acyltransferase 2 (mitochondrial 3-oxoacyl-coenzyme a thiolase)                                                                                                   | <i>Acaa2</i>                                                       | 2,66426732 | 8,87e-06   |
| Tripartite motif-containing 54                                                                                                                                                      | <i>Trim54</i>                                                      | 2,66241921 | 4,04e-05   |
| 2'-5' oligoadenylate synthetase-like 2                                                                                                                                              | <i>Oasl2</i>                                                       | 2,65109295 | 0,00036281 |
| Caax box 1c                                                                                                                                                                         | <i>Cxx1c</i>                                                       | 2,63300255 | 4,75e-07   |
| Ubiquitin specific peptidase 2                                                                                                                                                      | <i>Usp2</i>                                                        | 2,6292211  | 4,85e-06   |
| Ectopic ossification 1                                                                                                                                                              | <i>Etos1</i>                                                       | 2,61370147 | 2,48e-06   |
| Pituitary tumor-transforming 1 interacting protein                                                                                                                                  | <i>Pttg1ip</i>                                                     | 2,61179899 | 3,72e-07   |
| Vanin 1                                                                                                                                                                             | <i>Vnn1</i>                                                        | 2,60959197 | 8,02e-06   |
| Lysyl oxidase-like 3                                                                                                                                                                | <i>Loxl3</i>                                                       | 2,6059592  | 3,12e-06   |



|                                                                                 |                               |            |            |
|---------------------------------------------------------------------------------|-------------------------------|------------|------------|
| Zinc finger (ccch type), rna binding motif and serine/arginine rich 1           | <i>Zrsr1</i>                  | 2,59856461 | 2,15e-07   |
| Heparin-binding egf-like growth factor                                          | <i>Hbegf</i>                  | 2,59827551 | 1,34e-06   |
| Solute carrier family 15, member 5                                              | <i>Slc15a5</i>                | 2,59049273 | 7,02e-05   |
| Nme/nm23 family member 5                                                        | <i>Nme5</i>                   | 2,58634707 | 0,0001406  |
| D-aspartate oxidase                                                             | <i>Ddo</i>                    | 2,58405889 | 7,48e-06   |
| Cell division cycle 25c                                                         | <i>Cdc25c</i>                 | 2,58371879 | 5,35e-07   |
| Diaphanous homolog 1 (drosophila)                                               | <i>Diap1</i>                  | 2,57499166 | 2,77e-07   |
| Nuclear factor i/c                                                              | <i>Nfic</i>                   | 2,56202292 | 0,00464296 |
| Ring finger protein 130                                                         | <i>Rnf130</i>                 | 2,54804268 | 1,32e-06   |
| Family with sequence similarity 19, member a5                                   | <i>Fam19a5</i>                | 2,54701967 | 1,36e-07   |
| Start domain containing 8                                                       | <i>Stard8</i>                 | 2,54625643 | 1,33e-06   |
| Guanine nucleotide binding protein (g protein), gamma 2                         | <i>Gng2</i>                   | 2,54060994 | 0,00013146 |
| Ring finger protein 183                                                         | <i>Rnf183</i>                 | 2,53931384 | 2,37e-07   |
| G protein-coupled receptor 137b /// g protein-coupled receptor 137b, pseudogene | <i>Gpr137b /// gpr137b-ps</i> | 2,52744432 | 1,20e-07   |
| Pregnancy-associated plasma protein a                                           | <i>Pappa</i>                  | 2,52567019 | 1,11e-05   |
| Lps-responsive beige-like anchor                                                | <i>Lrba</i>                   | 2,52456969 | 4,49e-07   |
| Caprin family member 2                                                          | <i>Caprin2</i>                | 2,51885921 | 1,27e-05   |
| Guanylate binding protein 2b                                                    | <i>Gbp2b</i>                  | 2,50962903 | 6,20e-07   |
| N-myc downstream regulated gene 3                                               | <i>Ndr3</i>                   | 2,50257473 | 5,74e-07   |
| Purkinje cell protein 4                                                         | <i>Pcp4</i>                   | 2,50218694 | 3,06e-05   |
| Dystrophin myotonic-protein kinase                                              | <i>Dmpk</i>                   | 2,50210965 | 0,00036558 |
| Family with sequence similarity 214, member b                                   | <i>Fam214b</i>                | 2,50208351 | 7,05e-06   |
| Px domain containing serine/threonine kinase                                    | <i>Pxk</i>                    | 2,50067479 | 2,20e-06   |
| Intraflagellar transport 27                                                     | <i>Ift27</i>                  | 2,49195083 | 2,72e-06   |
| Peroxisomal biogenesis factor 3                                                 | <i>Pex3</i>                   | 2,49193063 | 0,00042254 |
| Ectonucleoside triphosphate diphosphohydrolase 5                                | <i>Entpd5</i>                 | 2,49157078 | 6,40e-07   |
| Histidyl-trna synthetase                                                        | <i>Hars</i>                   | 2,48933413 | 1,80e-07   |
| Methyltransferase like 7a2                                                      | <i>Mettl7a2</i>               | 2,48763584 | 4,23e-06   |
| Solute carrier family 12, member 5                                              | <i>Slc12a5</i>                | 2,48555327 | 4,91e-07   |
| Meis homeobox 1                                                                 | <i>Meis1</i>                  | 2,48431668 | 2,47e-06   |
| Potassium channel, subfamily k, member 13                                       | <i>Kcnk13</i>                 | 2,48114186 | 0,00012829 |
| Fizzy/cell division cycle 20 related 1 (drosophila)                             | <i>Fzr1</i>                   | 2,47907907 | 1,39e-05   |
| G protein-coupled receptor 137b                                                 | <i>Gpr137b</i>                | 2,47865955 | 1,12e-06   |
| Bcl2-related ovarian killer                                                     | <i>Bok</i>                    | 2,475733   | 3,19e-07   |
| Integrin beta 2                                                                 | <i>Itgb2</i>                  | 2,47221716 | 4,51e-06   |
| Ubiquitin-conjugating enzyme e2g 2                                              | <i>Ube2g2</i>                 | 2,47201496 | 0,00018562 |
| Tetraspanin 15                                                                  | <i>Tspan15</i>                | 2,4676528  | 4,43e-07   |
| Ferm domain containing 4b                                                       | <i>Frmd4b</i>                 | 2,46572004 | 0,00049508 |
| Utrophin                                                                        | <i>Utrn</i>                   | 2,462692   | 1,45e-07   |
| Myelin basic protein                                                            | <i>Mbp</i>                    | 2,46186887 | 8,46e-07   |
| Cdc23 cell division cycle 23                                                    | <i>Cdc23</i>                  | 2,46155869 | 0,00029662 |
| Serine hydrolase-like                                                           | <i>Serhl</i>                  | 2,45834857 | 9,05e-05   |
| Tubulin tyrosine ligase-like 1                                                  | <i>Ttll1</i>                  | 2,45626237 | 5,81e-06   |

|                                                                                               |                              |            |            |
|-----------------------------------------------------------------------------------------------|------------------------------|------------|------------|
| Adenomatosis polyposis coli                                                                   | <i>Apc</i>                   | 2,45399293 | 1,21e-05   |
| Riken cdna b230118h07 gene                                                                    | <i>B230118h07rik</i>         | 2,44835321 | 8,54e-07   |
| Kh domain containing, rna binding, signal transduction associated 3                           | <i>Khdrbs3</i>               | 2,44364974 | 2,34e-06   |
| Vesicle-associated membrane protein 5                                                         | <i>Vamp5</i>                 | 2,441881   | 1,40e-06   |
| Rab18, member ras oncogene family                                                             | <i>Rab18</i>                 | 2,44166221 | 0,00335377 |
| Nad(p) dependent steroid dehydrogenase-like                                                   | <i>Nsdhl</i>                 | 2,44066226 | 2,69e-07   |
| Ferm domain containing 6                                                                      | <i>Frmd6</i>                 | 2,4399466  | 1,83e-07   |
| Msh homeobox 2                                                                                | <i>Msx2</i>                  | 2,42082106 | 6,03e-07   |
| Dnaj (hsp40) homolog, subfamily b, member 4                                                   | <i>Dnajb4</i>                | 2,42070476 | 0,00040096 |
| Reticulon 4                                                                                   | <i>Rtn4</i>                  | 2,41916658 | 0,00069779 |
| Integrator complex subunit 6                                                                  | <i>Ints6</i>                 | 2,41716121 | 4,15e-07   |
| Zinc finger, cchc domain containing 7                                                         | <i>Zcchc7</i>                | 2,41564301 | 2,08e-06   |
| Gap junction protein, alpha 1                                                                 | <i>Gja1</i>                  | 2,40894813 | 0,0008928  |
| Component of oligomeric golgi complex 1 /// conserved oligomeric golgi complex subunit 1-like | <i>Cog1 /// loc102641618</i> | 2,40540314 | 1,71e-06   |
| Hematological and neurological expressed sequence 1                                           | <i>Hn1</i>                   | 2,40407012 | 1,46e-06   |
| Superoxide dismutase 3, extracellular                                                         | <i>Sod3</i>                  | 2,40387911 | 2,12e-05   |
| Hepatitis a virus cellular receptor 2                                                         | <i>Havcr2</i>                | 2,40316318 | 2,39e-05   |
| Sorting nexin 2                                                                               | <i>Snx2</i>                  | 2,40216798 | 5,51e-06   |
| Cdna sequence bc028528                                                                        | <i>Bc028528</i>              | 2,40081504 | 3,45e-05   |
| Dual specificity phosphatase 6                                                                | <i>Dusp6</i>                 | 2,39723338 | 1,34e-06   |
| Zxd family zinc finger c                                                                      | <i>Zxdc</i>                  | 2,39511181 | 0,00048171 |
| Triggering receptor expressed on myeloid cells 3                                              | <i>Trem3</i>                 | 2,39433008 | 2,65e-05   |
| Transgelin 3                                                                                  | <i>Tagln3</i>                | 2,39184867 | 6,42e-06   |
| Fig4 homolog (s. Cerevisiae)                                                                  | <i>Fig4</i>                  | 2,3849217  | 1,50e-06   |
| Cytochrome c oxidase subunit viia 1                                                           | <i>Cox7a1</i>                | 2,37699753 | 8,93e-05   |
| Amylo-1,6-glucosidase, 4-alpha-glucanotransferase                                             | <i>Agl</i>                   | 2,37356007 | 5,81e-06   |
| Expressed sequence aa408650                                                                   | <i>Aa408650</i>              | 2,37280948 | 2,03e-06   |
| Casein kappa                                                                                  | <i>Csn3</i>                  | 2,37217654 | 8,94e-05   |
| Drebrin-like                                                                                  | <i>Dbnl</i>                  | 2,36987435 | 3,09e-05   |
| Map kinase-interacting serine/threonine kinase 2                                              | <i>Mknk2</i>                 | 2,36795118 | 1,10e-05   |
| Complement component 3a receptor 1                                                            | <i>C3ar1</i>                 | 2,36637508 | 1,11e-05   |
| Translocase of outer mitochondrial membrane 34                                                | <i>Tom34</i>                 | 2,36452378 | 2,69e-07   |
| Carbohydrate sulfotransferase 2                                                               | <i>Chst2</i>                 | 2,36372335 | 1,98e-05   |
| Echinoderm microtubule associated protein like 6                                              | <i>Eml6</i>                  | 2,36265146 | 6,44e-06   |
| Mannosidase 1, alpha                                                                          | <i>Man1a</i>                 | 2,35863398 | 2,45e-05   |
| Nucleus accumbens associated 2, ben and btb (poz) domain containing                           | <i>Nacc2</i>                 | 2,35615093 | 4,00e-06   |
| Ino80 complex subunit c                                                                       | <i>Ino80c</i>                | 2,34532352 | 1,74e-06   |
| Kinesin light chain 1                                                                         | <i>Klc1</i>                  | 2,3348809  | 1,97e-06   |
| Triadin                                                                                       | <i>Trdn</i>                  | 2,33210583 | 1,60e-05   |
| Diaphanous homolog 2 (drosophila)                                                             | <i>Diap2</i>                 | 2,32991671 | 1,40e-05   |
| Transducin-like enhancer of split 2, homolog of drosophila e(spl)                             | <i>Tle2</i>                  | 2,32873421 | 5,64e-06   |
| Ankyrin repeat domain 44                                                                      | <i>Ankrd44</i>               | 2,3273202  | 3,00e-06   |

|                                                                       |                      |            |            |
|-----------------------------------------------------------------------|----------------------|------------|------------|
| Dna segment, chr 10, johns hopkins university 81 expressed            | <i>D10jhu81e</i>     | 2,32323056 | 6,03e-07   |
| Methyl-cpg binding domain protein 2                                   | <i>Mbd2</i>          | 2,3207191  | 6,18e-05   |
| F-box protein 4                                                       | <i>Fbxo4</i>         | 2,31675695 | 1,40e-06   |
| Adenylate kinase 1                                                    | <i>Ak1</i>           | 2,31612734 | 1,32e-06   |
| Sestrin 1                                                             | <i>Sesn1</i>         | 2,3130206  | 8,16e-05   |
| Catenin (cadherin associated protein), alpha-like 1                   | <i>Ctnnal1</i>       | 2,3128342  | 0,00027827 |
| Methionine sulfoxide reductase a                                      | <i>Msra</i>          | 2,3127591  | 4,65e-05   |
| Family with sequence similarity 26, member e                          | <i>Fam26e</i>        | 2,31259648 | 7,85e-05   |
| Mannosidase 2, alpha b2                                               | <i>Man2b2</i>        | 2,31230966 | 0,00028722 |
| Dna replication helicase 2 homolog (yeast)                            | <i>Dna2</i>          | 2,31066206 | 8,61e-06   |
| Peroxisomal biogenesis factor 12                                      | <i>Pex12</i>         | 2,30450004 | 1,60e-05   |
| Lanosterol synthase                                                   | <i>Lss</i>           | 2,29942532 | 2,77e-05   |
| Iq motif containing gtpase activating protein 3                       | <i>Iqgap3</i>        | 2,2977382  | 9,93e-07   |
| Small proline-rich protein 1a                                         | <i>Sprr1a</i>        | 2,29550383 | 1,45e-06   |
| Keratin 15                                                            | <i>Krt15</i>         | 2,29428812 | 6,13e-07   |
| Tripartite motif-containing 2                                         | <i>Trim2</i>         | 2,2934847  | 5,27e-05   |
| Family with sequence similarity 102, member a                         | <i>Fam102a</i>       | 2,28978737 | 1,31e-05   |
| Sorcin                                                                | <i>Sri</i>           | 2,28731923 | 5,69e-07   |
| Dematin actin binding protein                                         | <i>Dmtn</i>          | 2,28348291 | 1,77e-05   |
| Brain glycogen phosphorylase                                          | <i>Pygb</i>          | 2,28181775 | 6,47e-07   |
| Adaptor-related protein complex 3, delta 1 subunit                    | <i>Ap3d1</i>         | 2,27187343 | 3,37e-06   |
| Serum/glucocorticoid regulated kinase 3                               | <i>Sgk3</i>          | 2,26995298 | 0,0040274  |
| Cd99 antigen                                                          | <i>Cd99</i>          | 2,2694601  | 0,00029662 |
| Tripartite motif-containing 12a                                       | <i>Trim12a</i>       | 2,26696023 | 6,39e-05   |
| Absent in melanoma 1                                                  | <i>Aim1</i>          | 2,26582527 | 9,71e-06   |
| Axin2                                                                 | <i>Axin2</i>         | 2,26530155 | 3,83e-05   |
| Collagen, type xviii, alpha 1                                         | <i>Col18a1</i>       | 2,26439469 | 8,60e-07   |
| Riken cDNA 3110002h16 gene                                            | <i>3110002h16rik</i> | 2,26251912 | 1,18e-06   |
| Brain-specific angiogenesis inhibitor 1-associated protein 2          | <i>Baiap2</i>        | 2,26165368 | 2,04e-06   |
| Transmembrane and coiled coil domains 3                               | <i>Tmcc3</i>         | 2,26146761 | 0,0014497  |
| Guanylate binding protein 2                                           | <i>Gbp2</i>          | 2,26090422 | 0,00024593 |
| Wd repeat domain 1                                                    | <i>Wdr1</i>          | 2,26046763 | 0,00010181 |
| Phosphoinositide-3-kinase, class 3                                    | <i>Pik3c3</i>        | 2,26039111 | 3,70e-06   |
| Transformed mouse 3t3 cell double minute 1                            | <i>Mdm1</i>          | 2,25994736 | 0,00035815 |
| Inad-like (drosophila)                                                | <i>Inadl</i>         | 2,25847887 | 6,14e-05   |
| T-box18                                                               | <i>Tbx18</i>         | 2,25826596 | 0,0006818  |
| Transmembrane protein 71                                              | <i>Tmem71</i>        | 2,25531478 | 1,22e-05   |
| Inhibitor of dna binding 2                                            | <i>Id2</i>           | 2,2539335  | 3,31e-05   |
| Solute carrier family 37 (glycerol-3-phosphate transporter), member 1 | <i>Slc37a1</i>       | 2,25235836 | 4,67e-06   |
| Slain motif family, member 1                                          | <i>Slain1</i>        | 2,25067213 | 2,61e-05   |
| Breast carcinoma amplified sequence 3                                 | <i>Bcas3</i>         | 2,2453744  | 9,16e-05   |
| Potassium channel tetramerisation domain containing 1                 | <i>Kctd1</i>         | 2,2435253  | 1,84e-05   |

|                                                      |                      |            |            |
|------------------------------------------------------|----------------------|------------|------------|
| Ring finger protein 14                               | <i>Rnf14</i>         | 2,24332793 | 0,0046821  |
| Urocortin 2                                          | <i>Ucn2</i>          | 2,24164383 | 6,07e-05   |
| Mterf domain containing 3                            | <i>Mterfd3</i>       | 2,24152026 | 2,37e-06   |
| Proline-rich coiled-coil 1                           | <i>Prrc1</i>         | 2,24115119 | 6,43e-06   |
| Bmp and activin membrane-bound inhibitor             | <i>Bambi</i>         | 2,23533894 | 0,00198832 |
| Guanylate binding protein 7                          | <i>Gbp7</i>          | 2,23532435 | 2,28e-05   |
| Component of oligomeric golgi complex 1              | <i>Cog1</i>          | 2,23228612 | 5,21e-06   |
| Riken cdna 5430435g22 gene                           | <i>5430435g22rik</i> | 2,23061104 | 4,93e-06   |
| Abhydrolase domain containing 17a                    | <i>Abhd17a</i>       | 2,22966516 | 1,80e-05   |
| Prostaglandin i2 (prostacyclin) synthase             | <i>Ptgis</i>         | 2,2266828  | 5,89e-05   |
| Elac homolog 1 (e. Coli)                             | <i>Elac1</i>         | 2,22602261 | 0,0001302  |
| Aldehyde dehydrogenase family 7, member a1           | <i>Aldh7a1</i>       | 2,22578025 | 1,59e-06   |
| Testis expressed gene 13                             | <i>Tex13</i>         | 2,22462541 | 5,95e-05   |
| Rna binding motif protein, x chromosome              | <i>RbmX</i>          | 2,22461118 | 1,61e-06   |
| Guanidinoacetate methyltransferase                   | <i>Gamt</i>          | 2,22422423 | 1,87e-06   |
| Enoyl coenzyme a hydratase domain containing 1       | <i>Echdc1</i>        | 2,22130236 | 1,70e-05   |
| Rab13, member ras oncogene family                    | <i>Rab13</i>         | 2,21587047 | 1,23e-05   |
| Inhibitor of kappab kinase gamma                     | <i>Ikbkg</i>         | 2,21545211 | 1,03e-05   |
| Tubulin, beta 3 class iii                            | <i>Tubb3</i>         | 2,2145971  | 0,00021518 |
| Vacuolar protein sorting 45 (yeast)                  | <i>Vps45</i>         | 2,21336725 | 2,50e-06   |
| Cdna sequence bc031181                               | <i>Bc031181</i>      | 2,21039217 | 2,22e-05   |
| Potassium channel, subfamily k, member 2             | <i>Kcnk2</i>         | 2,20867466 | 2,39e-06   |
| Iduronate 2-sulfatase                                | <i>Ids</i>           | 2,20651993 | 0,00186513 |
| High-mobility group nucleosome binding domain 5      | <i>Hmgn5</i>         | 2,20438878 | 6,00e-06   |
| Rap guanine nucleotide exchange factor (gef) 3       | <i>Rapgef3</i>       | 2,20314589 | 0,00054829 |
| Ataxin 10                                            | <i>Atxn10</i>        | 2,20010489 | 1,87e-06   |
| Transcription factor cp2-like 1                      | <i>Tfcp2l1</i>       | 2,19998438 | 0,00026222 |
| Pyrimidinergic receptor p2y, g-protein coupled, 6    | <i>P2ry6</i>         | 2,19936537 | 1,93e-06   |
| Myosin, heavy polypeptide 1, skeletal muscle, adult  | <i>Myh1</i>          | 2,19395812 | 0,00011967 |
| Natriuretic peptide type b                           | <i>Nppb</i>          | 2,19265627 | 2,89e-06   |
| Dedicator of cytokinesis 9                           | <i>Dock9</i>         | 2,18899792 | 2,59e-06   |
| Lectin, mannose-binding, 1                           | <i>Lman1</i>         | 2,18867025 | 1,45e-05   |
| Leucine rich repeat (in flil) interacting protein 1  | <i>Lrrfip1</i>       | 2,18474241 | 1,71e-06   |
| Ras association (ralgds/af-6) domain family member 3 | <i>Rassf3</i>        | 2,18449884 | 2,89e-06   |
| Tetraspanin 7                                        | <i>Tspan7</i>        | 2,1840865  | 2,89e-05   |
| Erythrocyte protein band 4.1-like 1                  | <i>Epb4.1l1</i>      | 2,1834121  | 2,48e-06   |
| Hydroxysteroid (17-beta) dehydrogenase 7             | <i>Hsd17b7</i>       | 2,18014349 | 8,64e-06   |
| Atp-binding cassette, sub-family d (ald), member 1   | <i>Abcd1</i>         | 2,1793252  | 0,00014513 |
| F-box protein 16                                     | <i>Fbxo16</i>        | 2,17902065 | 8,81e-05   |
| Inhibitor of dna binding 1                           | <i>Id1</i>           | 2,17629811 | 4,07e-05   |
| Zinc finger e-box binding homeobox 1                 | <i>Zeb1</i>          | 2,17623552 | 1,07e-06   |
| Zinc finger, matrin type 2                           | <i>Zmat2</i>         | 2,17601271 | 2,10e-06   |
| Bridging integrator 1                                | <i>Bin1</i>          | 2,17436886 | 9,59e-07   |
| Adenylate cyclase 9                                  | <i>Adcy9</i>         | 2,1743594  | 4,15e-05   |

|                                                                                                              |                         |            |            |
|--------------------------------------------------------------------------------------------------------------|-------------------------|------------|------------|
| Inositol 1,4,5-trisphosphate receptor 1                                                                      | <i>Itpr1</i>            | 2,17398716 | 0,00022595 |
| Small integral membrane protein 3                                                                            | <i>Smim3</i>            | 2,17373767 | 4,10e-07   |
| Adaptor-related protein complex 2, beta 1 subunit                                                            | <i>Ap2b1</i>            | 2,1726938  | 1,68e-05   |
| Leucine-rich repeat-containing g protein-coupled receptor 6                                                  | <i>Lgr6</i>             | 2,17156835 | 3,01e-05   |
| Coiled-coil domain containing 109b                                                                           | <i>Ccdc109b</i>         | 2,1683645  | 8,30e-06   |
| Biogenesis of lysosomal organelles complex-1, subunit 1 /// retinol dehydrogenase 5                          | <i>Bloc1s1 /// rdh5</i> | 2,16632549 | 1,13e-05   |
| Bcl2-associated athanogene 2                                                                                 | <i>Bag2</i>             | 2,16240014 | 9,00e-05   |
| Farnesyl diphosphate synthetase                                                                              | <i>Fdps</i>             | 2,15800307 | 3,06e-06   |
| Protein tyrosine phosphatase, receptor type, m                                                               | <i>Ptprm</i>            | 2,15108565 | 1,36e-06   |
| Oaf homolog (drosophila)                                                                                     | <i>Oaf</i>              | 2,15055653 | 7,19e-07   |
| Special at-rich sequence binding protein 1                                                                   | <i>Satb1</i>            | 2,14726244 | 3,04e-06   |
| 2-hydroxyacyl-coa lyase 1                                                                                    | <i>Hacl1</i>            | 2,14093006 | 2,72e-05   |
| Lim-domain containing, protein kinase                                                                        | <i>Limk1</i>            | 2,14036978 | 3,92e-05   |
| Vps20-associated 1 homolog (s. Cerevisiae)                                                                   | <i>Vta1</i>             | 2,13915805 | 4,00e-06   |
| Phosphofructokinase, muscle                                                                                  | <i>Pfkm</i>             | 2,13582168 | 5,35e-07   |
| Rho family gtpase 2                                                                                          | <i>Rnd2</i>             | 2,13460329 | 8,19e-06   |
| Peptidylprolyl isomerase (cyclophilin)-like 4                                                                | <i>Ppil4</i>            | 2,13187324 | 4,93e-06   |
| Transmembrane protein 43                                                                                     | <i>Tmem43</i>           | 2,13142023 | 2,88e-06   |
| Leucine rich repeat containing 57                                                                            | <i>Lrrc57</i>           | 2,13131305 | 1,30e-05   |
| Acyl-coa synthetase short-chain family member 2                                                              | <i>Acss2</i>            | 2,12980045 | 2,85e-06   |
| Rad51 homolog b                                                                                              | <i>Rad51b</i>           | 2,1263448  | 5,17e-05   |
| Phosphatase and actin regulator 2                                                                            | <i>Phactr2</i>          | 2,12406581 | 0,00020156 |
| Small nuclear ribonucleoprotein 25 (u11/u12)                                                                 | <i>Snrnp25</i>          | 2,12273219 | 3,39e-06   |
| Fascin homolog 1, actin bundling protein (strongylocentrotus purpuratus)                                     | <i>Fscn1</i>            | 2,12265941 | 0,00151792 |
| Rna binding motif, single stranded interacting protein 2                                                     | <i>Rbms2</i>            | 2,12134277 | 6,12e-06   |
| Zinc finger, matrin type 5                                                                                   | <i>Zmat5</i>            | 2,12072619 | 8,49e-06   |
| Transcription factor 4                                                                                       | <i>Tcf4</i>             | 2,11882565 | 3,50e-05   |
| Breast cancer anti-estrogen resistance 3                                                                     | <i>Bcar3</i>            | 2,11689582 | 3,82e-06   |
| Dehydrogenase/reductase (sdr family) member 3                                                                | <i>Dhrs3</i>            | 2,11526758 | 1,57e-05   |
| Rho gtpase activating protein 23                                                                             | <i>Arhgap23</i>         | 2,11272659 | 3,28e-06   |
| Kinesin family member 13a                                                                                    | <i>Kif13a</i>           | 2,11117477 | 1,57e-06   |
| Tropomyosin 2, beta                                                                                          | <i>Tpm2</i>             | 2,11024964 | 0,00382322 |
| Pleckstrin homology-like domain, family a, member 1                                                          | <i>Phlda1</i>           | 2,10484945 | 5,95e-05   |
| Transmembrane protein 140                                                                                    | <i>Tmem140</i>          | 2,10391051 | 9,30e-06   |
| Trichohyalin                                                                                                 | <i>Tchh</i>             | 2,10244495 | 2,55e-05   |
| Cytoplasmic fmr1 interacting protein 2                                                                       | <i>Cyfp2</i>            | 2,10192223 | 4,07e-05   |
| Pterin 4 alpha carbinolamine dehydratase/dimerization cofactor of hepatocyte nuclear factor 1 alpha (tcf1) 2 | <i>Pcbd2</i>            | 2,09990891 | 3,64e-06   |
| Contactin 6                                                                                                  | <i>Cntn6</i>            | 2,09846977 | 3,43e-05   |
| Wd repeat and fyve domain containing 1                                                                       | <i>Wdfy1</i>            | 2,09845578 | 7,92e-06   |
| Dynactin 4                                                                                                   | <i>Dctn4</i>            | 2,09362517 | 0,00029726 |
| Integrin beta 3 binding protein (beta3-endonexin)                                                            | <i>Itgb3bp</i>          | 2,09331654 | 0,00015115 |
| Interleukin 17 receptor c                                                                                    | <i>Il17rc</i>           | 2,09323679 | 1,59e-05   |

|                                                                                       |                                 |            |            |
|---------------------------------------------------------------------------------------|---------------------------------|------------|------------|
| Riken cdna 2610002m06 gene /// charged multivesicular body protein 1b                 | 2610002m06rik /// <i>chmp1b</i> | 2,09178123 | 2,72e-05   |
| Family with sequence similarity 189, member b                                         | <i>Fam189b</i>                  | 2,09019885 | 4,93e-06   |
| Chymotrypsin-like elastase family, member 1                                           | <i>Cela1</i>                    | 2,0897211  | 0,00024476 |
| Spc25, ndc80 kinetochore complex component, homolog (s. Cerevisiae)                   | <i>Spc25</i>                    | 2,08938307 | 2,69e-05   |
| Thrombospondin 2                                                                      | <i>Thbs2</i>                    | 2,08845624 | 8,05e-07   |
| Cdp-diacylglycerol synthase (phosphatidate cytidyltransferase) 2                      | <i>Cds2</i>                     | 2,08556022 | 1,09e-05   |
| Adenosine deaminase, rna-specific, b1                                                 | <i>Adarb1</i>                   | 2,08482261 | 4,28e-05   |
| Cysteine-rich with egf-like domains 1                                                 | <i>Creld1</i>                   | 2,08438589 | 6,40e-05   |
| Riken cdna 2010005h15 gene /// predicted gene 5483                                    | 2010005h15rik /// <i>gm5483</i> | 2,08304715 | 0,00024611 |
| Steroid receptor rna activator 1                                                      | <i>Sra1</i>                     | 2,0830348  | 4,18e-06   |
| Riken cdna 2010111i01 gene                                                            | 2010111i01rik                   | 2,08280406 | 7,56e-07   |
| Monocyte to macrophage differentiation-associated                                     | <i>Mmd</i>                      | 2,08173437 | 8,73e-06   |
| S100 calcium binding protein a1                                                       | <i>S100a1</i>                   | 2,07874422 | 9,73e-06   |
| Laminin, gamma 2                                                                      | <i>Lamc2</i>                    | 2,07523039 | 1,24e-06   |
| Excision repair cross-complementing rodent repair deficiency, complementation group 3 | <i>Ercc3</i>                    | 2,0750309  | 7,87e-06   |
| Adaptor-related protein complex 1, sigma 2 subunit                                    | <i>Ap1s2</i>                    | 2,0749498  | 5,04e-05   |
| Glucosidase, alpha; neutral c                                                         | <i>Ganc</i>                     | 2,0738577  | 0,00020872 |
| Keratin 19                                                                            | <i>Krt19</i>                    | 2,07216939 | 7,08e-06   |
| Supervillin                                                                           | <i>Svil</i>                     | 2,0712849  | 2,44e-06   |
| Suppressor of variegation 3-9 homolog 1 (drosophila)                                  | <i>Suv39h1</i>                  | 2,0700919  | 0,0040523  |
| Gh3 domain containing                                                                 | <i>Ghdc</i>                     | 2,06988223 | 8,52e-06   |
| Immediate early response 3 interacting protein 1                                      | <i>Ier3ip1</i>                  | 2,06958291 | 3,20e-05   |
| Dihydropyrimidinase-like 3                                                            | <i>Dpysl3</i>                   | 2,0653754  | 1,12e-06   |
| Lamin b1                                                                              | <i>Lmnb1</i>                    | 2,06503107 | 1,42e-05   |
| Serine (or cysteine) peptidase inhibitor, clade b, member 9                           | <i>Serpinb9</i>                 | 2,06383227 | 5,78e-05   |
| Trafficking protein particle complex 1                                                | <i>Trappc1</i>                  | 2,0636294  | 3,37e-06   |
| Zinc finger homeodomain 4                                                             | <i>Zfhx4</i>                    | 2,06276804 | 1,83e-05   |
| Jagged 1                                                                              | <i>Jag1</i>                     | 2,06170026 | 0,00025432 |
| Fun14 domain containing 2                                                             | <i>Fundc2</i>                   | 2,06146351 | 0,00011189 |
| Integrin linked kinase                                                                | <i>Ilk</i>                      | 2,06118381 | 0,00212743 |
| Vacuolar protein sorting 25 (yeast)                                                   | <i>Vps25</i>                    | 2,0602113  | 0,00029919 |
| Camp responsive element binding protein 3-like 2                                      | <i>Creb3l2</i>                  | 2,06017667 | 3,84e-06   |
| Wingless-type mmtv integration site family, member 4                                  | <i>Wnt4</i>                     | 2,05805102 | 4,48e-06   |
| Homeobox d8                                                                           | <i>Hoxd8</i>                    | 2,0569466  | 6,33e-06   |
| Cytochrome b5 type a (microsomal)                                                     | <i>Cyb5a</i>                    | 2,05646598 | 1,69e-06   |
| Cytochrome p450, family 2, subfamily j, polypeptide 6                                 | <i>Cyp2j6</i>                   | 2,05510134 | 9,86e-05   |
| Epithelial membrane protein 3                                                         | <i>Emp3</i>                     | 2,05380505 | 3,82e-06   |
| Rho gtpase activating protein 1                                                       | <i>Arhgap1</i>                  | 2,05358925 | 0,00060328 |
| Solute carrier family 31, member 2                                                    | <i>Slc31a2</i>                  | 2,05226697 | 8,73e-06   |
| Human immunodeficiency virus type i enhancer binding protein 3                        | <i>Hivep3</i>                   | 2,05202476 | 8,58e-06   |

|                                                                                        |                      |            |            |
|----------------------------------------------------------------------------------------|----------------------|------------|------------|
| Discs, large homolog 3 (drosophila)                                                    | <i>Dlg3</i>          | 2,05123032 | 2,00e-06   |
| Riken cdna 1810043g02 gene                                                             | <i>1810043g02rik</i> | 2,0488184  | 4,75e-05   |
| Glutamate-ammonia ligase (glutamine synthetase)                                        | <i>Glul</i>          | 2,04781496 | 6,14e-05   |
| N-sulfoglucosamine sulfohydrolase (sulfamidase)                                        | <i>Sgsh</i>          | 2,04700859 | 3,11e-06   |
| Gamma-glutamyltransferase 7                                                            | <i>Ggt7</i>          | 2,04653237 | 2,78e-05   |
| Dual specificity phosphatase 10                                                        | <i>Dusp10</i>        | 2,04522323 | 5,71e-06   |
| Transmembrane protein 19                                                               | <i>Tmem19</i>        | 2,04119661 | 1,69e-05   |
| Homeobox b4                                                                            | <i>Hoxb4</i>         | 2,04069396 | 0,00074228 |
| Riken cdna c030006k11 gene                                                             | <i>C030006k11rik</i> | 2,0404248  | 0,00032809 |
| Myeloid nuclear differentiation antigen like                                           | <i>Mndal</i>         | 2,039439   | 0,00090306 |
| Sec11 homolog c (s. Cerevisiae)                                                        | <i>Sec11c</i>        | 2,03883897 | 3,31e-05   |
| Abelson helper integration site 1                                                      | <i>Ahi1</i>          | 2,03818218 | 1,78e-05   |
| Single-pass membrane protein with aspartate rich tail 1                                | <i>Smdt1</i>         | 2,03729639 | 1,53e-06   |
| Tubulin, beta 2a class iia                                                             | <i>Tubb2a</i>        | 2,03696342 | 1,59e-06   |
| Btb (poz) domain containing 2                                                          | <i>Btbd2</i>         | 2,03278492 | 2,55e-05   |
| Ring finger protein 141                                                                | <i>Rnf141</i>        | 2,03011457 | 0,00016588 |
| Discs, large homolog 5 (drosophila)                                                    | <i>Dlg5</i>          | 2,02941793 | 0,00143944 |
| Rh blood group, d antigen                                                              | <i>Rhd</i>           | 2,02904596 | 1,37e-05   |
| Colony stimulating factor 2 receptor, beta, low-affinity (granulocyte-macrophage)      | <i>Csf2rb</i>        | 2,02729002 | 8,98e-05   |
| Solute carrier family 25 (mitochondrial carrier, dicarboxylate transporter), member 10 | <i>Slc25a10</i>      | 2,02690075 | 2,19e-05   |
| Transmembrane protein 184a                                                             | <i>Tmem184a</i>      | 2,02534307 | 8,26e-05   |
| Ferrochelatase                                                                         | <i>Fech</i>          | 2,0250255  | 7,96e-05   |
| Sparc related modular calcium binding 1                                                | <i>Smoc1</i>         | 2,02499161 | 0,00017179 |
| Low density lipoprotein receptor class a domain containing 4                           | <i>Ldlrad4</i>       | 2,02329457 | 0,00010893 |
| Wd repeat domain 33                                                                    | <i>Wdr33</i>         | 2,02313835 | 0,00046531 |
| Neurochondrin                                                                          | <i>Ncdn</i>          | 2,02049767 | 0,00732446 |
| Transformation related protein 53 inducible nuclear protein 2                          | <i>Trp53inp2</i>     | 2,01728594 | 1,88e-05   |
| Sulfite oxidase                                                                        | <i>Suox</i>          | 2,01505386 | 1,78e-06   |
| Oxysterol binding protein-like 6                                                       | <i>Osbpl6</i>        | 2,01503262 | 0,00561657 |
| Ribosomal rna processing 1 homolog (s. Cerevisiae)                                     | <i>Rrp1</i>          | 2,01441241 | 3,04e-05   |
| Ubiquitin specific peptidase 20                                                        | <i>Usp20</i>         | 2,01439169 | 0,00034084 |
| Calcitonin/calcitonin-related polypeptide, alpha                                       | <i>Calca</i>         | 2,01302292 | 0,0002504  |
| Helicase (dna) b                                                                       | <i>Helb</i>          | 2,01125506 | 0,00023024 |
| Taf7 rna polymerase ii, tata box binding protein (tbp)-associated factor               | <i>Taf7</i>          | 2,01085688 | 0,00071665 |
| Tec protein tyrosine kinase                                                            | <i>Tec</i>           | 2,00989897 | 6,22e-05   |
| Zinc finger, nfx1-type containing 1                                                    | <i>Znfx1</i>         | 2,00878765 | 3,61e-05   |
| Cndp dipeptidase 2 (metallopeptidase m20 family)                                       | <i>Cndp2</i>         | 2,00695112 | 4,33e-06   |
| N-ethylmaleimide sensitive fusion protein attachment protein gamma                     | <i>Napg</i>          | 2,00386381 | 2,58e-06   |
| Homeobox c13                                                                           | <i>Hoxc13</i>        | 2,00279637 | 1,32e-05   |
| Transformed mouse 3t3 cell double minute 2                                             | <i>Mdm2</i>          | 2,00231965 | 6,96e-05   |
| Protein tyrosine phosphatase, receptor type, e                                         | <i>Ptpre</i>         | 2,00220628 | 2,54e-05   |

|                                                                                                   |                      |            |            |
|---------------------------------------------------------------------------------------------------|----------------------|------------|------------|
| Apoptotic peptidase activating factor 1                                                           | <i>Apaf1</i>         | 2,00207316 | 1,26e-05   |
| Swi/snf related, matrix associated, actin dependent regulator of chromatin, subfamily b, member 1 | <i>Smarchb1</i>      | 2,00166969 | 1,05e-05   |
| A disintegrin and metallopeptidase domain 12 (meltrin alpha)                                      | <i>Adam12</i>        | 2,00151693 | 0,00034898 |
| Rac gtpase-activating protein 1                                                                   | <i>Racgap1</i>       | 2,00061181 | 7,35e-06   |
| Polycystic kidney disease 2-like 2                                                                | <i>Pkd2l2</i>        | 1,99804079 | 0,00331437 |
| Ral guanine nucleotide dissociation stimulator,-like 1                                            | <i>Rgl1</i>          | 1,9980263  | 5,10e-06   |
| Cell division cycle associated 3                                                                  | <i>Cdca3</i>         | 1,99688373 | 1,95e-06   |
| Phosphodiesterase 2a, cgmp-stimulated                                                             | <i>Pde2a</i>         | 1,99136485 | 5,98e-05   |
| Syntaxin 7                                                                                        | <i>Stx7</i>          | 1,98903502 | 4,10e-06   |
| Riken cdna 1110007c09 gene                                                                        | <i>1110007c09rik</i> | 1,9885144  | 1,98e-05   |
| Cap, adenylate cyclase-associated protein, 2 (yeast)                                              | <i>Cap2</i>          | 1,98759836 | 2,06e-05   |
| Vacuolar protein sorting 53 (yeast)                                                               | <i>Vps53</i>         | 1,98565916 | 0,00021822 |
| Alanyl-trna synthetase domain containing 1                                                        | <i>Aarsd1</i>        | 1,98526003 | 1,93e-05   |
| Ankyrin repeat and ef-hand domain containing 1                                                    | <i>Ankef1</i>        | 1,98521112 | 0,00025226 |
| Spectrin repeat containing, nuclear envelope 1                                                    | <i>Syne1</i>         | 1,98469494 | 2,46e-05   |
| Myotubularin related protein 1                                                                    | <i>Mtmr1</i>         | 1,98400019 | 8,71e-07   |
| Sorting nexin 6                                                                                   | <i>Snx6</i>          | 1,98332364 | 9,41e-05   |
| Mitogen-activated protein kinase kinase kinase 8                                                  | <i>Map3k8</i>        | 1,98324949 | 0,0015479  |
| Glial cell line derived neurotrophic factor family receptor alpha 1                               | <i>Gfra1</i>         | 1,98207132 | 0,00487008 |
| Tetratricopeptide repeat domain 39c                                                               | <i>Ttc39c</i>        | 1,98172085 | 5,04e-06   |
| Dep domain containing mtor-interacting protein                                                    | <i>Deptor</i>        | 1,98079697 | 0,00037702 |
| S100 calcium binding protein a13                                                                  | <i>S100a13</i>       | 1,98074284 | 6,10e-06   |
| Iq motif and sec7 domain 1                                                                        | <i>Iqsec1</i>        | 1,97937603 | 1,85e-05   |
| Ltv1 homolog (s. Cerevisiae)                                                                      | <i>Ltv1</i>          | 1,97895183 | 1,31e-05   |
| Ubiquitin-conjugating enzyme e2d 2a                                                               | <i>Ube2d2a</i>       | 1,97834756 | 0,00935618 |
| Solute carrier family 48 (heme transporter), member 1                                             | <i>Slc48a1</i>       | 1,97625402 | 9,52e-07   |
| Potassium channel, subfamily u, member 1                                                          | <i>Kcnu1</i>         | 1,97607769 | 6,83e-05   |
| Family with sequence similarity 107, member b                                                     | <i>Fam107b</i>       | 1,97590473 | 6,39e-06   |
| Max-like protein x                                                                                | <i>Mlx</i>           | 1,97569971 | 1,25e-05   |
| Nestin                                                                                            | <i>Nes</i>           | 1,97477003 | 2,58e-05   |
| Non-smc condensin ii complex, subunit h2                                                          | <i>Ncaph2</i>        | 1,97453914 | 4,02e-06   |
| Charged multivesicular body protein 4c                                                            | <i>Chmp4c</i>        | 1,97369272 | 0,00015891 |
| Fyve and coiled-coil domain containing 1                                                          | <i>Fyco1</i>         | 1,97259088 | 1,13e-05   |
| Myosin, heavy polypeptide 9, non-muscle                                                           | <i>Myh9</i>          | 1,97254682 | 0,00011485 |
| Protein-l-isoaspartate (d-aspartate) o-methyltransferase 1                                        | <i>Pcmt1</i>         | 1,97174512 | 2,42e-05   |
| Ras related protein 1b                                                                            | <i>Rap1b</i>         | 1,97124059 | 0,00032551 |
| Leucine rich repeat containing 20                                                                 | <i>Lrrc20</i>        | 1,96948282 | 4,04e-05   |
| Huntingtin interacting protein 1                                                                  | <i>Hip1</i>          | 1,96913317 | 1,48e-05   |
| Potassium channel tetramerisation domain containing 10                                            | <i>Kctd10</i>        | 1,96846598 | 5,28e-06   |
| Glutaminyl-trna synthase (glutamine-hydrolyzing)-like 1                                           | <i>Qrsl1</i>         | 1,96802013 | 9,51e-05   |



|                                                                                                                                                                                                                                                                                                                                                                                                                                                                                                                                                                                                                                                                                                                                                                                                                                                                                          |                                                                                                                                                                                                                                                                               |            |            |
|------------------------------------------------------------------------------------------------------------------------------------------------------------------------------------------------------------------------------------------------------------------------------------------------------------------------------------------------------------------------------------------------------------------------------------------------------------------------------------------------------------------------------------------------------------------------------------------------------------------------------------------------------------------------------------------------------------------------------------------------------------------------------------------------------------------------------------------------------------------------------------------|-------------------------------------------------------------------------------------------------------------------------------------------------------------------------------------------------------------------------------------------------------------------------------|------------|------------|
| Predicted gene 7040 /// prolactin family 2, subfamily c, member 2 /// prolactin family 2, subfamily c, member 3 /// prolactin family 2, subfamily c, member 4 /// prolactin family 2, subfamily c, member 5                                                                                                                                                                                                                                                                                                                                                                                                                                                                                                                                                                                                                                                                              | <i>Gm7040 /// prl2c2 /// prl2c3 /// prl2c4 /// prl2c5</i>                                                                                                                                                                                                                     | 1,96745478 | 8,56e-05   |
| Proteasome (prosome, macropain) assembly chaperone 2                                                                                                                                                                                                                                                                                                                                                                                                                                                                                                                                                                                                                                                                                                                                                                                                                                     | <i>Psmg2</i>                                                                                                                                                                                                                                                                  | 1,96709284 | 1,33e-05   |
| Synovial sarcoma translocation, chromosome 18                                                                                                                                                                                                                                                                                                                                                                                                                                                                                                                                                                                                                                                                                                                                                                                                                                            | <i>Ss18</i>                                                                                                                                                                                                                                                                   | 1,96683909 | 0,00574606 |
| Eukaryotic translation initiation factor 2d                                                                                                                                                                                                                                                                                                                                                                                                                                                                                                                                                                                                                                                                                                                                                                                                                                              | <i>Eif2d</i>                                                                                                                                                                                                                                                                  | 1,96645019 | 2,18e-05   |
| G protein-coupled receptor, family c, group 5, member b                                                                                                                                                                                                                                                                                                                                                                                                                                                                                                                                                                                                                                                                                                                                                                                                                                  | <i>Gprc5b</i>                                                                                                                                                                                                                                                                 | 1,96552599 | 2,48e-05   |
| Glutathione peroxidase 8 (putative)                                                                                                                                                                                                                                                                                                                                                                                                                                                                                                                                                                                                                                                                                                                                                                                                                                                      | <i>Gpx8</i>                                                                                                                                                                                                                                                                   | 1,9644943  | 1,39e-06   |
| Dna segment, chr 10, wayne state university 102, expressed                                                                                                                                                                                                                                                                                                                                                                                                                                                                                                                                                                                                                                                                                                                                                                                                                               | <i>D10wsu102e</i>                                                                                                                                                                                                                                                             | 1,96385366 | 1,73e-05   |
| Transaldolase 1                                                                                                                                                                                                                                                                                                                                                                                                                                                                                                                                                                                                                                                                                                                                                                                                                                                                          | <i>Taldo1</i>                                                                                                                                                                                                                                                                 | 1,96281633 | 2,56e-06   |
| Oncoprotein induced transcript 3                                                                                                                                                                                                                                                                                                                                                                                                                                                                                                                                                                                                                                                                                                                                                                                                                                                         | <i>Oit3</i>                                                                                                                                                                                                                                                                   | 1,96065627 | 0,00033648 |
| Brain and reproductive organ-expressed protein                                                                                                                                                                                                                                                                                                                                                                                                                                                                                                                                                                                                                                                                                                                                                                                                                                           | <i>Bre</i>                                                                                                                                                                                                                                                                    | 1,95968408 | 0,00021363 |
| Glucosaminyl (n-acetyl) transferase 3, mucin type                                                                                                                                                                                                                                                                                                                                                                                                                                                                                                                                                                                                                                                                                                                                                                                                                                        | <i>Gcnt3</i>                                                                                                                                                                                                                                                                  | 1,95875326 | 1,33e-05   |
| Bcl2-associated athanogene 3                                                                                                                                                                                                                                                                                                                                                                                                                                                                                                                                                                                                                                                                                                                                                                                                                                                             | <i>Bag3</i>                                                                                                                                                                                                                                                                   | 1,95717189 | 2,65e-05   |
| Neoplastic progression 2                                                                                                                                                                                                                                                                                                                                                                                                                                                                                                                                                                                                                                                                                                                                                                                                                                                                 | <i>Npn2</i>                                                                                                                                                                                                                                                                   | 1,95480949 | 4,92e-05   |
| Inositol (myo)-1(or 4)-monophosphatase 2                                                                                                                                                                                                                                                                                                                                                                                                                                                                                                                                                                                                                                                                                                                                                                                                                                                 | <i>Impa2</i>                                                                                                                                                                                                                                                                  | 1,95274897 | 6,90e-06   |
| G two s phase expressed protein 1                                                                                                                                                                                                                                                                                                                                                                                                                                                                                                                                                                                                                                                                                                                                                                                                                                                        | <i>Gtse1</i>                                                                                                                                                                                                                                                                  | 1,95245989 | 3,42e-05   |
| Protocadherin gamma subfamily a, 1 /// protocadherin gamma subfamily a, 10 /// protocadherin gamma subfamily a, 11 /// protocadherin gamma subfamily a, 12 /// protocadherin gamma subfamily a, 2 /// protocadherin gamma subfamily a, 3 /// protocadherin gamma subfamily a, 4 /// protocadherin gamma subfamily a, 5 /// protocadherin gamma subfamily a, 6 /// protocadherin gamma subfamily a, 7 /// protocadherin gamma subfamily a, 8 /// protocadherin gamma subfamily a, 9 /// protocadherin gamma subfamily b, 1 /// protocadherin gamma subfamily b, 2 /// protocadherin gamma subfamily b, 4 /// protocadherin gamma subfamily b, 5 /// protocadherin gamma subfamily b, 6 /// protocadherin gamma subfamily b, 7 /// protocadherin gamma subfamily b, 8 /// protocadherin gamma subfamily c, 3 /// protocadherin gamma subfamily c, 4 /// protocadherin gamma subfamily c, 5 | <i>Pcdhga1 /// pcdhga10 /// pcdhga11 /// pcdhga12 /// pcdhga2 /// pcdhga3 /// pcdhga4 /// pcdhga5 /// pcdhga6 /// pcdhga7 /// pcdhga8 /// pcdhga9 /// pcdhgb1 /// pcdhgb2 /// pcdhgb4 /// pcdhgb5 /// pcdhgb6 /// pcdhgb7 /// pcdhgb8 /// pcdhgc3 /// pcdhgc4 /// pcdhgc5</i> | 1,95118241 | 0,000744   |
| Sorting nexin 12                                                                                                                                                                                                                                                                                                                                                                                                                                                                                                                                                                                                                                                                                                                                                                                                                                                                         | <i>Snx12</i>                                                                                                                                                                                                                                                                  | 1,95022546 | 6,37e-05   |
| Leucine carboxyl methyltransferase 1                                                                                                                                                                                                                                                                                                                                                                                                                                                                                                                                                                                                                                                                                                                                                                                                                                                     | <i>Lcmt1</i>                                                                                                                                                                                                                                                                  | 1,94823548 | 5,03e-06   |
| Baculoviral iap repeat-containing 5                                                                                                                                                                                                                                                                                                                                                                                                                                                                                                                                                                                                                                                                                                                                                                                                                                                      | <i>Birc5</i>                                                                                                                                                                                                                                                                  | 1,94651539 | 5,26e-06   |
| Reversion-inducing-cysteine-rich protein with kazal motifs                                                                                                                                                                                                                                                                                                                                                                                                                                                                                                                                                                                                                                                                                                                                                                                                                               | <i>Reck</i>                                                                                                                                                                                                                                                                   | 1,94484114 | 0,00117776 |
| Plakophilin 1                                                                                                                                                                                                                                                                                                                                                                                                                                                                                                                                                                                                                                                                                                                                                                                                                                                                            | <i>Pkp1</i>                                                                                                                                                                                                                                                                   | 1,9433897  | 0,00258752 |
| Tyrosine 3-monooxygenase/tryptophan 5-monooxygenase activation protein, zeta polypeptide                                                                                                                                                                                                                                                                                                                                                                                                                                                                                                                                                                                                                                                                                                                                                                                                 | <i>Ywhaz</i>                                                                                                                                                                                                                                                                  | 1,9420982  | 1,81e-06   |
| Death-associated protein kinase 3                                                                                                                                                                                                                                                                                                                                                                                                                                                                                                                                                                                                                                                                                                                                                                                                                                                        | <i>Dapk3</i>                                                                                                                                                                                                                                                                  | 1,94113028 | 0,00553691 |
| Potassium channel tetramerisation domain containing 2                                                                                                                                                                                                                                                                                                                                                                                                                                                                                                                                                                                                                                                                                                                                                                                                                                    | <i>Kctd2</i>                                                                                                                                                                                                                                                                  | 1,93836114 | 6,48e-06   |
| Dnaj (hsp40) homolog, subfamily c, member 14                                                                                                                                                                                                                                                                                                                                                                                                                                                                                                                                                                                                                                                                                                                                                                                                                                             | <i>Dnajc14</i>                                                                                                                                                                                                                                                                | 1,93800827 | 6,00e-06   |
| Eph receptor a7                                                                                                                                                                                                                                                                                                                                                                                                                                                                                                                                                                                                                                                                                                                                                                                                                                                                          | <i>Epha7</i>                                                                                                                                                                                                                                                                  | 1,93694036 | 0,00238751 |

|                                                                                                                                                                                                                                                                                                                                                                                                      |                                                                                                                                                                   |            |            |
|------------------------------------------------------------------------------------------------------------------------------------------------------------------------------------------------------------------------------------------------------------------------------------------------------------------------------------------------------------------------------------------------------|-------------------------------------------------------------------------------------------------------------------------------------------------------------------|------------|------------|
| Lactate dehydrogenase b                                                                                                                                                                                                                                                                                                                                                                              | <i>Ldhb</i>                                                                                                                                                       | 1,93656808 | 8,66e-05   |
| Amyloid beta (a4) precursor protein-binding, family b, member 3                                                                                                                                                                                                                                                                                                                                      | <i>Apbb3</i>                                                                                                                                                      | 1,93619414 | 0,00040787 |
| Bone morphogenetic protein 1                                                                                                                                                                                                                                                                                                                                                                         | <i>Bmp1</i>                                                                                                                                                       | 1,93478564 | 0,00034443 |
| Fch and double sh3 domains 1                                                                                                                                                                                                                                                                                                                                                                         | <i>Fchsd1</i>                                                                                                                                                     | 1,93452423 | 0,00019962 |
| Adrenergic receptor, beta 2                                                                                                                                                                                                                                                                                                                                                                          | <i>Adrb2</i>                                                                                                                                                      | 1,93438386 | 0,001184   |
| Fanconi anemia, complementation group c                                                                                                                                                                                                                                                                                                                                                              | <i>Fancc</i>                                                                                                                                                      | 1,93411653 | 1,35e-05   |
| Myosin, light polypeptide 6, alkali, smooth muscle and non-muscle pseudogene /// myosin light polypeptide 6 alkali smooth muscle and non-muscle protein, pseudogene /// myosin light polypeptide 6-like /// myosin, light polypeptide 6, alkali, smooth muscle and non-muscle                                                                                                                        | <i>Gm5526 /// gm8894 /// loc102643184 /// myl6</i>                                                                                                                | 1,93342631 | 3,06e-06   |
| Zinc finger matrin type 3                                                                                                                                                                                                                                                                                                                                                                            | <i>Zmat3</i>                                                                                                                                                      | 1,93307474 | 2,48e-05   |
| Glutaminy-peptide cyclotransferase (glutaminy cyclase)                                                                                                                                                                                                                                                                                                                                               | <i>Qpct</i>                                                                                                                                                       | 1,93116133 | 8,26e-05   |
| Mannan-binding lectin serine peptidase 1                                                                                                                                                                                                                                                                                                                                                             | <i>Masp1</i>                                                                                                                                                      | 1,92910071 | 0,00010425 |
| Was protein family, member 1                                                                                                                                                                                                                                                                                                                                                                         | <i>Wasf1</i>                                                                                                                                                      | 1,92884674 | 1,98e-05   |
| Coagulation factor viii                                                                                                                                                                                                                                                                                                                                                                              | <i>F8</i>                                                                                                                                                         | 1,92829518 | 8,73e-06   |
| Coiled-coil domain containing 93                                                                                                                                                                                                                                                                                                                                                                     | <i>Ccdc93</i>                                                                                                                                                     | 1,92534005 | 0,00016082 |
| Tensin 1                                                                                                                                                                                                                                                                                                                                                                                             | <i>Tns1</i>                                                                                                                                                       | 1,92430631 | 0,00015697 |
| D-tyrosyl-trna deacylase 1                                                                                                                                                                                                                                                                                                                                                                           | <i>Dtd1</i>                                                                                                                                                       | 1,92404699 | 4,35e-06   |
| Dynein light chain tctex-type 3                                                                                                                                                                                                                                                                                                                                                                      | <i>Dynlt3</i>                                                                                                                                                     | 1,92326527 | 0,00552465 |
| Non-smc condensin i complex, subunit g                                                                                                                                                                                                                                                                                                                                                               | <i>Ncapg</i>                                                                                                                                                      | 1,92241446 | 7,43e-06   |
| Transforming growth factor beta 1 induced transcript 1                                                                                                                                                                                                                                                                                                                                               | <i>Tgfb1i1</i>                                                                                                                                                    | 1,92199589 | 0,00060122 |
| Migration and invasion enhancer 1                                                                                                                                                                                                                                                                                                                                                                    | <i>Mien1</i>                                                                                                                                                      | 1,91856566 | 2,82e-05   |
| Grainyhead-like 1 (drosophila)                                                                                                                                                                                                                                                                                                                                                                       | <i>Grhl1</i>                                                                                                                                                      | 1,91725263 | 0,00033453 |
| P53 and dna damage regulated 1                                                                                                                                                                                                                                                                                                                                                                       | <i>Pdrg1</i>                                                                                                                                                      | 1,91608685 | 6,94e-06   |
| Mitochondrial gtpase 1 homolog (s. Cerevisiae)                                                                                                                                                                                                                                                                                                                                                       | <i>Mtg1</i>                                                                                                                                                       | 1,91587269 | 1,38e-05   |
| Pq loop repeat containing 1                                                                                                                                                                                                                                                                                                                                                                          | <i>Pqlc1</i>                                                                                                                                                      | 1,91451351 | 1,20e-05   |
| Platelet derived growth factor receptor, beta polypeptide                                                                                                                                                                                                                                                                                                                                            | <i>Pdgfrb</i>                                                                                                                                                     | 1,9141167  | 3,13e-05   |
| Protocadherin alpha 1 /// protocadherin alpha 10 /// protocadherin alpha 11 /// protocadherin alpha 12 /// protocadherin alpha 2 /// protocadherin alpha 3 /// protocadherin alpha 4 /// protocadherin alpha 5 /// protocadherin alpha 6 /// protocadherin alpha 7 /// protocadherin alpha 8 /// protocadherin alpha 9 /// protocadherin alpha subfamily c, 1 /// protocadherin alpha subfamily c, 2 | <i>Pcdha1 /// pcdha10 /// pcdha11 /// pcdha12 /// pcdha2 /// pcdha3 /// pcdha4 /// pcdha5 /// pcdha6 /// pcdha7 /// pcdha8 /// pcdha9 /// pcdhac1 /// pcdhac2</i> | 1,91383703 | 1,63e-05   |
| Caspase 12                                                                                                                                                                                                                                                                                                                                                                                           | <i>Casp12</i>                                                                                                                                                     | 1,91334526 | 5,47e-06   |
| Na+/k+ transporting atpase interacting 1                                                                                                                                                                                                                                                                                                                                                             | <i>Nkain1</i>                                                                                                                                                     | 1,91324442 | 5,20e-06   |
| Short stature homeobox 2                                                                                                                                                                                                                                                                                                                                                                             | <i>Shox2</i>                                                                                                                                                      | 1,9130595  | 2,48e-05   |
| Centrosomal protein 112                                                                                                                                                                                                                                                                                                                                                                              | <i>Cep112</i>                                                                                                                                                     | 1,911885   | 1,77e-05   |
| Stimulated by retinoic acid 13                                                                                                                                                                                                                                                                                                                                                                       | <i>Stra13</i>                                                                                                                                                     | 1,91083924 | 4,92e-05   |
| Zinc finger protein 758                                                                                                                                                                                                                                                                                                                                                                              | <i>Zfp758</i>                                                                                                                                                     | 1,90899784 | 0,00206984 |
| Receptor (calcitonin) activity modifying protein 2 /// vacuolar protein sorting 25 (yeast)                                                                                                                                                                                                                                                                                                           | <i>Ramp2 /// vps25</i>                                                                                                                                            | 1,90846557 | 2,59e-06   |
| Malic enzyme 2, nad(+)-dependent, mitochondrial                                                                                                                                                                                                                                                                                                                                                      | <i>Me2</i>                                                                                                                                                        | 1,90740081 | 5,04e-06   |

|                                                                                       |                            |            |            |
|---------------------------------------------------------------------------------------|----------------------------|------------|------------|
| Ankyrin repeat and socs box-containing 13                                             | <i>Asb13</i>               | 1,90738024 | 0,00239436 |
| Diaphanous homolog 3 (drosophila)                                                     | <i>Diap3</i>               | 1,90636967 | 9,06e-05   |
| Synapse associated protein 1                                                          | <i>Syap1</i>               | 1,90587223 | 1,32e-05   |
| Katanin p60 (atpase-containing) subunit a1                                            | <i>Katna1</i>              | 1,90457622 | 2,48e-06   |
| Protein tyrosine phosphatase, receptor type, a                                        | <i>Ptptra</i>              | 1,90363994 | 1,24e-05   |
| Ddb1 and cul4 associated factor 11                                                    | <i>Dcaf11</i>              | 1,90282752 | 0,00018727 |
| Histocompatibility 13                                                                 | <i>H13</i>                 | 1,90221516 | 7,85e-06   |
| Aldo-keto reductase family 1, member c12 /// aldo-keto reductase family 1, member c13 | <i>Akr1c12 /// akr1c13</i> | 1,90197454 | 0,00034139 |
| Ras suppressor protein 1                                                              | <i>Rsu1</i>                | 1,90184914 | 1,15e-05   |
| N(alpha)-acetyltransferase 10, nata catalytic subunit                                 | <i>Naa10</i>               | 1,89889751 | 1,46e-05   |
| Histone deacetylase 5                                                                 | <i>Hdac5</i>               | 1,8982923  | 2,48e-05   |
| Salvador homolog 1 (drosophila)                                                       | <i>Sav1</i>                | 1,89731526 | 0,00169417 |
| N-myristoyltransferase 1                                                              | <i>Nmt1</i>                | 1,89637924 | 3,18e-06   |
| Gats protein-like 2                                                                   | <i>Gatsl2</i>              | 1,89626772 | 1,73e-05   |
| Aldo-keto reductase family 1, member c13                                              | <i>Akr1c13</i>             | 1,89625713 | 0,00014853 |
| Dnaj (hsp40) homolog, subfamily c, member 9                                           | <i>Dnajc9</i>              | 1,8961265  | 2,71e-06   |
| Imp2 inner mitochondrial membrane peptidase-like (s. Cerevisiae)                      | <i>Imp2l</i>               | 1,89600848 | 2,34e-05   |
| Aryl-hydrocarbon receptor                                                             | <i>Ahr</i>                 | 1,89560469 | 0,00150161 |
| Cysteine-rich c-terminal 1                                                            | <i>Crct1</i>               | 1,89477507 | 1,83e-05   |
| Rab3a interacting protein                                                             | <i>Rab3ip</i>              | 1,89443804 | 1,64e-05   |
| Phospholipase a2, group iie                                                           | <i>Pla2g2e</i>             | 1,89432391 | 1,27e-05   |
| Niemann-pick type c1                                                                  | <i>Npc1</i>                | 1,89420571 | 8,69e-06   |
| Riken cdna 1700020i14 gene                                                            | <i>1700020i14rik</i>       | 1,89412373 | 5,29e-05   |
| Dnaj (hsp40) homolog, subfamily b, member 5                                           | <i>Dnajb5</i>              | 1,89320855 | 0,00012758 |
| Myosin, light polypeptide 4                                                           | <i>Myl4</i>                | 1,89308278 | 0,00015881 |
| Elongation factor 1 homolog (elf1, s. Cerevisiae)                                     | <i>Elof1</i>               | 1,89179163 | 1,18e-05   |
| Thioredoxin-like 1                                                                    | <i>Txn1</i>                | 1,89161045 | 1,65e-05   |
| Maturin, neural progenitor differentiation regulator homolog (xenopus)                | <i>Mturn</i>               | 1,89066538 | 0,0001208  |
| Ring finger protein 144b                                                              | <i>Rnf144b</i>             | 1,88761668 | 3,66e-06   |
| Proline/serine-rich coiled-coil 1                                                     | <i>Psrc1</i>               | 1,88736751 | 2,00e-05   |
| Seh1-like (s. Cerevisiae)                                                             | <i>Seh1</i>                | 1,88718736 | 9,94e-05   |
| Gtp cyclohydrolase 1                                                                  | <i>Gch1</i>                | 1,88706501 | 5,87e-05   |
| Early b cell factor 3                                                                 | <i>Ebf3</i>                | 1,88673881 | 0,00536257 |
| Predicted gene 5553 /// orm1-like 2 (s. Cerevisiae)                                   | <i>Gm5553 /// ormdl2</i>   | 1,88389169 | 2,30e-05   |
| Microsomal glutathione s-transferase 3                                                | <i>Mgst3</i>               | 1,88354425 | 2,25e-05   |
| Thiopurine methyltransferase                                                          | <i>Tpmt</i>                | 1,88248621 | 9,95e-05   |
| Ngfi-a binding protein 2                                                              | <i>Nab2</i>                | 1,8810258  | 0,00131953 |
| Endosulfine alpha                                                                     | <i>Ensa</i>                | 1,88055841 | 4,90e-05   |
| Phosphatidylinositol-4-phosphate 5-kinase, type 1 gamma                               | <i>Pip5k1c</i>             | 1,8803225  | 0,00039835 |
| Dymeclin                                                                              | <i>Dym</i>                 | 1,87878734 | 1,16e-05   |
| Chromodomain helicase dna binding protein 1-like                                      | <i>Chd1l</i>               | 1,87763681 | 5,61e-05   |
| Guanosine diphosphate (gdp) dissociation inhibitor 1                                  | <i>Gdi1</i>                | 1,87762762 | 8,10e-05   |

|                                                                 |                                      |            |            |
|-----------------------------------------------------------------|--------------------------------------|------------|------------|
| Inositol polyphosphate-1-phosphatase                            | <i>Inpp1</i>                         | 1,87757532 | 1,63e-05   |
| Calcium/calmodulin-dependent protein kinase ii, delta           | <i>Camk2d</i>                        | 1,87730293 | 0,00018618 |
| Cytochrome c oxidase assembly protein 16                        | <i>Cox16</i>                         | 1,87702808 | 1,32e-05   |
| Predicted gene 12693 /// rwd domain containing 1                | <i>Gm12693 /// rwd1</i>              | 1,87639045 | 0,00066046 |
| Tetratricopeptide repeat domain 1                               | <i>Ttc1</i>                          | 1,8762646  | 1,36e-05   |
| Twist basic helix-loop-helix transcription factor 2             | <i>Twist2</i>                        | 1,8726078  | 4,21e-05   |
| Cytoplasmic polyadenylation element binding protein 1           | <i>Cpeb1</i>                         | 1,87226731 | 0,00020268 |
| Adaptor-related protein complex 2, alpha 2 subunit              | <i>Ap2a2</i>                         | 1,8721288  | 0,00016498 |
| Dna primase, p49 subunit                                        | <i>Prim1</i>                         | 1,87166063 | 9,56e-06   |
| Zinc finger protein 931                                         | <i>Zfp931</i>                        | 1,87160947 | 0,00033395 |
| Mitochondrial ribosomal protein s16                             | <i>Mrps16</i>                        | 1,87073223 | 6,62e-06   |
| Mediator complex subunit 30                                     | <i>Med30</i>                         | 1,87037669 | 1,01e-05   |
| Lim domain and actin binding 1                                  | <i>Lima1</i>                         | 1,86980875 | 8,67e-06   |
| Chibby homolog 1 (drosophila)                                   | <i>Cby1</i>                          | 1,86929054 | 2,55e-05   |
| Angiopoietin 1                                                  | <i>Angpt1</i>                        | 1,86749783 | 0,0004692  |
| Cdna sequence bc005624                                          | <i>Bc005624</i>                      | 1,86749158 | 0,00019819 |
| Collagen, type vii, alpha 1                                     | <i>Col7a1</i>                        | 1,86664943 | 0,00042024 |
| Proteasome (prosome, macropain) inhibitor subunit 1             | <i>Psmf1</i>                         | 1,86592579 | 5,85e-06   |
| Malignant t cell amplified sequence 1                           | <i>Mcts1</i>                         | 1,8659064  | 3,18e-06   |
| Ganglioside-induced differentiation-associated protein 1-like 1 | <i>Gdap1l1</i>                       | 1,86588194 | 0,0007816  |
| S-antigen, retina and pineal gland (arrestin)                   | <i>Sag</i>                           | 1,86554945 | 0,00029511 |
| Centrin 3                                                       | <i>Cetn3</i>                         | 1,86547948 | 3,60e-06   |
| Hect, uba and wwe domain containing 1                           | <i>Huwe1</i>                         | 1,86298582 | 1,78e-05   |
| Nicalin homolog (zebrafish)                                     | <i>Ncln</i>                          | 1,86243725 | 0,00043986 |
| Signal transducer and activator of transcription 1              | <i>Stat1</i>                         | 1,86206256 | 0,00028404 |
| Sirtuin 7                                                       | <i>Sirt7</i>                         | 1,86174594 | 2,06e-05   |
| Atpase, class vi, type 11c                                      | <i>Atp11c</i>                        | 1,86072715 | 0,00515454 |
| Zinc finger, an1 type domain 2b                                 | <i>Zfand2b</i>                       | 1,85854472 | 0,00018742 |
| Guanylate cyclase activator 1b                                  | <i>Guca1b</i>                        | 1,85808293 | 4,86e-05   |
| Integrator complex subunit 3                                    | <i>Ints3</i>                         | 1,85752731 | 0,00072372 |
| Component of oligomeric golgi complex 6                         | <i>Cog6</i>                          | 1,85493192 | 6,77e-06   |
| Mediator complex subunit 14                                     | <i>Med14</i>                         | 1,85479715 | 0,00051561 |
| Parathymosin                                                    | <i>Ptms</i>                          | 1,85476661 | 0,0036531  |
| 5',3'-nucleotidase, cytosolic                                   | <i>Nt5c</i>                          | 1,8544462  | 2,21e-05   |
| Phosphodiesterase 3a, cgmp inhibited                            | <i>Pde3a</i>                         | 1,85310838 | 9,29e-05   |
| Arfgap with sh3 domain, ankyrin repeat and ph domain1           | <i>Asap1</i>                         | 1,85289042 | 2,37e-06   |
| Prefoldin 1                                                     | <i>Pfdn1</i>                         | 1,8525045  | 1,48e-05   |
| Riken cdna 0610010b08 gene /// predicted gene 14295             | <i>0610010b08rik /// gm14295 ///</i> | 1,85161862 | 0,00056186 |
| /// predicted gene 14305 /// predicted gene 14308 ///           | <i>gm14305 ///</i>                   |            |            |
| predicted gene 14419 /// predicted gene 14430 ///               | <i>gm14308 ///</i>                   |            |            |
| predicted gene 14432 /// predicted gene 14434 ///               | <i>gm14419 ///</i>                   |            |            |
| predicted gene 2004 /// predicted gene 4724                     | <i>gm14430 ///</i>                   |            |            |
|                                                                 | <i>gm14432 ///</i>                   |            |            |

|                                                                                                           |                                          |            |            |
|-----------------------------------------------------------------------------------------------------------|------------------------------------------|------------|------------|
|                                                                                                           | <i>gm14434 /// gm2004<br/>/// gm4724</i> |            |            |
| Hydroxysteroid (17-beta) dehydrogenase 4                                                                  | <i>Hsd17b4</i>                           | 1,85133946 | 5,52e-05   |
| Sterol regulatory element binding factor 2                                                                | <i>Srebf2</i>                            | 1,85026046 | 1,87e-05   |
| Sec63-like (s. Cerevisiae)                                                                                | <i>Sec63</i>                             | 1,84978738 | 8,73e-06   |
| Casein kinase 1, gamma 2                                                                                  | <i>Csnk1g2</i>                           | 1,84976683 | 2,39e-05   |
| Downstream of stk11                                                                                       | <i>Dos</i>                               | 1,84936092 | 0,00151327 |
| Mitochondrial ribosomal protein s25                                                                       | <i>Mrps25</i>                            | 1,84920861 | 2,20e-05   |
| Myosin xviiiia                                                                                            | <i>Myo18a</i>                            | 1,84875746 | 0,00017742 |
| Glyoxalase domain containing 4                                                                            | <i>Glod4</i>                             | 1,84721949 | 1,15e-05   |
| Rab2b, member ras oncogene family                                                                         | <i>Rab2b</i>                             | 1,84714233 | 0,00023531 |
| Lysophosphatidylcholine acyltransferase 1                                                                 | <i>Lpcat1</i>                            | 1,84710747 | 0,00147883 |
| Pq loop repeat containing                                                                                 | <i>Pqlc3</i>                             | 1,84657218 | 4,04e-05   |
| Threonyl-trna synthetase 2, mitochondrial (putative)                                                      | <i>Tars2</i>                             | 1,84610115 | 2,13e-05   |
| Pituitary tumor-transforming gene 1                                                                       | <i>Pttg1</i>                             | 1,84590891 | 5,94e-06   |
| Succinyl-coa glutarate-coa transferase                                                                    | <i>Sugct</i>                             | 1,84511891 | 1,36e-05   |
| Spermatogenesis associated glutamate (e)-rich protein 4a                                                  | <i>Speer4a</i>                           | 1,84476272 | 0,00695992 |
| Riken cDNA 1700037h04 gene                                                                                | <i>1700037h04rik</i>                     | 1,84400001 | 0,00515454 |
| Fyve, rhogef and ph domain containing 6                                                                   | <i>Fgd6</i>                              | 1,84174742 | 0,00066336 |
| Cortactin                                                                                                 | <i>Cttn</i>                              | 1,84115259 | 0,000649   |
| Smad family member 2                                                                                      | <i>Smad2</i>                             | 1,84079729 | 0,00020133 |
| Phosphatidylserine decarboxylase, pseudogene 3                                                            | <i>Pisd-ps3</i>                          | 1,84052153 | 7,88e-06   |
| Alveolar soft part sarcoma chromosome region, candidate 1 (human)                                         | <i>Aspscr1</i>                           | 1,83996215 | 8,61e-06   |
| G protein-coupled receptor kinase 4                                                                       | <i>Grk4</i>                              | 1,83894789 | 4,60e-05   |
| Anaphase promoting complex subunit 16                                                                     | <i>Anapc16</i>                           | 1,8387825  | 7,31e-06   |
| Colony stimulating factor 2 receptor, beta 2, low-affinity (granulocyte-macrophage)                       | <i>Csf2rb2</i>                           | 1,83785952 | 0,00053599 |
| Phosphorylase kinase alpha 2                                                                              | <i>Phka2</i>                             | 1,83715375 | 7,58e-06   |
| Sh3-binding domain glutamic acid-rich protein like                                                        | <i>Sh3bgrl</i>                           | 1,83694512 | 0,00349371 |
| Rio kinase 3                                                                                              | <i>Riok3</i>                             | 1,83418263 | 0,00011878 |
| Erythrocyte protein band 4.1-like 4a                                                                      | <i>Epb4.14a</i>                          | 1,83416841 | 2,43e-05   |
| Tubulin, alpha 4a                                                                                         | <i>Tuba4a</i>                            | 1,83139569 | 3,51e-05   |
| Protein inhibitor of activated stat 3                                                                     | <i>Pias3</i>                             | 1,83001686 | 1,92e-05   |
| Solute carrier family 25, member 51                                                                       | <i>Slc25a51</i>                          | 1,82988065 | 0,00695315 |
| Phosphatidylserine decarboxylase, pseudogene 1 /// phosphatidylserine decarboxylase, pseudogene 3         | <i>Pisd-ps1 /// pisd-ps3</i>             | 1,82973128 | 1,47e-05   |
| Dnaj (hsp40) homolog, subfamily c, member 19 /// dnaj (hsp40) homolog, subfamily c, member 19, pseudogene | <i>Dnajc19 /// dnajc19-ps</i>            | 1,82856212 | 4,02e-05   |
| Dnaj (hsp40) homolog, subfamily b, member 6                                                               | <i>Dnajb6</i>                            | 1,82681592 | 0,00011703 |
| Thymopoietin                                                                                              | <i>Tmpo</i>                              | 1,82636381 | 0,00751075 |
| Sorbitol dehydrogenase                                                                                    | <i>Sord</i>                              | 1,82474738 | 4,08e-05   |
| Casp8 and fadd-like apoptosis regulator                                                                   | <i>Cflar</i>                             | 1,82443874 | 8,91e-06   |
| Methionine sulfoxide reductase b1                                                                         | <i>Msrb1</i>                             | 1,82362574 | 0,00784485 |
| Smad family member 7                                                                                      | <i>Smad7</i>                             | 1,82360368 | 0,00095714 |
| Dual specificity phosphatase 1                                                                            | <i>Dusp1</i>                             | 1,82351571 | 0,0012097  |

|                                                                            |                              |            |            |
|----------------------------------------------------------------------------|------------------------------|------------|------------|
| Electron transferring flavoprotein, dehydrogenase                          | <i>Etfdh</i>                 | 1,82228244 | 0,0002593  |
| Peroxisomal biogenesis factor 7                                            | <i>Pex7</i>                  | 1,82022414 | 9,45e-05   |
| Mediator complex subunit 27                                                | <i>Med27</i>                 | 1,81996208 | 3,85e-05   |
| Meiosis 1 associated protein                                               | <i>M1ap</i>                  | 1,81915672 | 8,32e-05   |
| Trafficking protein particle complex 2                                     | <i>Trappc2</i>               | 1,8184565  | 0,00087461 |
| Parvin, alpha                                                              | <i>Parva</i>                 | 1,81841995 | 2,56e-05   |
| Formin binding protein 1                                                   | <i>Fnbp1</i>                 | 1,81801523 | 9,89e-06   |
| Zeta-chain (tcr) associated protein kinase                                 | <i>Zap70</i>                 | 1,81715753 | 3,58e-05   |
| Regulator of cell cycle                                                    | <i>Rgcc</i>                  | 1,81609011 | 0,00067056 |
| Phosphatidylinositol transfer protein, alpha                               | <i>Pitpna</i>                | 1,81554958 | 5,69e-05   |
| Oxysterol binding protein-like 1a                                          | <i>Osbpl1a</i>               | 1,81551798 | 3,35e-05   |
| Riken cdna 3830403n18 gene /// x-linked lymphocyte-regulated               | <i>3830403n18rik /// xlr</i> | 1,81387816 | 7,12e-05   |
| Tetraspanin 5                                                              | <i>Tspan5</i>                | 1,81323641 | 7,96e-05   |
| Sorting nexin 3                                                            | <i>Snx3</i>                  | 1,81305455 | 6,77e-06   |
| Nitrogen permease regulator-like 3                                         | <i>Nprl3</i>                 | 1,81292424 | 4,25e-05   |
| Adp-ribosylation factor-like 6 interacting protein 1                       | <i>Arl6ip1</i>               | 1,8126088  | 1,41e-05   |
| Dual specificity phosphatase 19                                            | <i>Dusp19</i>                | 1,81220547 | 0,00018329 |
| Ubiquitin protein ligase e3b                                               | <i>Ube3b</i>                 | 1,8114149  | 4,33e-05   |
| Keratin 23                                                                 | <i>Krt23</i>                 | 1,81123157 | 8,35e-05   |
| Histidyl-trna synthetase 2, mitochondrial (putative)                       | <i>Hars2</i>                 | 1,80996624 | 7,15e-05   |
| Farnesyl diphosphate farnesyl transferase 1                                | <i>Fdft1</i>                 | 1,80863395 | 6,20e-06   |
| Polymerase (dna directed), mu                                              | <i>Polm</i>                  | 1,80751813 | 0,00038779 |
| Rho gtpase activating protein 17                                           | <i>Arhgap17</i>              | 1,80621546 | 4,26e-05   |
| Integrin beta 1 binding protein 1                                          | <i>Itgb1bp1</i>              | 1,80572206 | 1,78e-05   |
| ATPase, class ii, type 9b                                                  | <i>Atp9b</i>                 | 1,8045927  | 9,75e-06   |
| Runt-related transcription factor 1; translocated to, 1 (cyclin d-related) | <i>Runx1t1</i>               | 1,80384765 | 0,00241931 |
| Solute carrier family 12, member 6                                         | <i>Slc12a6</i>               | 1,80373352 | 1,74e-05   |
| Mesenteric estrogen dependent adipogenesis                                 | <i>Medag</i>                 | 1,8029394  | 0,0001208  |
| Run and sh3 domain containing 2                                            | <i>Rusc2</i>                 | 1,80070581 | 5,11e-05   |
| Rab3b, member ras oncogene family                                          | <i>Rab3b</i>                 | 1,80011976 | 1,82e-05   |
| Vesicle-associated membrane protein, associated protein b and c            | <i>Vapb</i>                  | 1,80002782 | 0,00321267 |
| Purinergic receptor p2x, ligand-gated ion channel, 5                       | <i>P2rx5</i>                 | 1,79947721 | 0,00012379 |
| Zinc finger and btb domain containing 20                                   | <i>Zbtb20</i>                | 1,79710012 | 0,00464988 |
| Solute carrier family 12, member 2                                         | <i>Slc12a2</i>               | 1,79650208 | 1,02e-05   |
| Growth arrest and dna-damage-inducible 45 gamma                            | <i>Gadd45g</i>               | 1,79628533 | 5,25e-05   |
| Transmembrane protein 45a                                                  | <i>Tmem45a</i>               | 1,79620404 | 0,00017721 |
| D site albumin promoter binding protein                                    | <i>Dbp</i>                   | 1,79613277 | 7,81e-05   |
| Dnaj (hsp40) homolog, subfamily c, member 18                               | <i>Dnajc18</i>               | 1,79455681 | 7,88e-05   |
| Tetraspanin 9                                                              | <i>Tspan9</i>                | 1,79428963 | 2,72e-05   |
| Solute carrier family 39 (zinc transporter), member 3                      | <i>Slc39a3</i>               | 1,79391584 | 3,95e-05   |
| Latexin                                                                    | <i>Lxn</i>                   | 1,79385296 | 6,57e-06   |
| Family with sequence similarity 50, member a                               | <i>Fam50a</i>                | 1,79235113 | 1,34e-05   |
| Interleukin-1 receptor-associated kinase 1                                 | <i>Irak1</i>                 | 1,79093832 | 1,51e-05   |

|                                                                                                                                                                                                                                           |                                   |            |            |
|-------------------------------------------------------------------------------------------------------------------------------------------------------------------------------------------------------------------------------------------|-----------------------------------|------------|------------|
| Ras association (ralgds/af-6) domain family (n-terminal) member 8                                                                                                                                                                         | <i>Rassf8</i>                     | 1,79012335 | 6,42e-06   |
| Wd repeat containing planar cell polarity effector                                                                                                                                                                                        | <i>Wdpcp</i>                      | 1,78963045 | 0,00061828 |
| Adenosine deaminase, trna-specific 3 /// secretory carrier membrane protein 4                                                                                                                                                             | <i>Adat3 /// scamp4</i>           | 1,78928035 | 0,00017552 |
| Ik cytokine                                                                                                                                                                                                                               | <i>Ik</i>                         | 1,78853785 | 6,79e-06   |
| Methylcrotonoyl-coenzyme a carboxylase 1 (alpha)                                                                                                                                                                                          | <i>Mccc1</i>                      | 1,78772656 | 4,05e-05   |
| Chloride channel 4-2                                                                                                                                                                                                                      | <i>Clcn4-2</i>                    | 1,78747127 | 6,89e-05   |
| Endoplasmic reticulum chaperone sil1 homolog (s. Cerevisiae)                                                                                                                                                                              | <i>Sil1</i>                       | 1,78694168 | 7,04e-06   |
| Creatine kinase, brain                                                                                                                                                                                                                    | <i>Ckb</i>                        | 1,7857676  | 2,33e-05   |
| Ral guanine nucleotide dissociation stimulator-like 3                                                                                                                                                                                     | <i>Rgl3</i>                       | 1,78493322 | 0,00028429 |
| Riken cdna 1110058119 gene                                                                                                                                                                                                                | <i>1110058119rik</i>              | 1,78485378 | 5,78e-05   |
| Adenosine deaminase, trna-specific 2                                                                                                                                                                                                      | <i>Adat2</i>                      | 1,78377998 | 0,00017987 |
| Camp responsive element binding protein 3                                                                                                                                                                                                 | <i>Creb3</i>                      | 1,78372086 | 1,84e-05   |
| Polymerase (rna) i polypeptide e                                                                                                                                                                                                          | <i>Polr1e</i>                     | 1,7832969  | 0,00013751 |
| Methionine aminopeptidase 2                                                                                                                                                                                                               | <i>Metap2</i>                     | 1,78295602 | 0,00138414 |
| Riken cdna 3110057o12 gene /// predicted gene 2011                                                                                                                                                                                        | <i>3110057o12rik /// gm2011</i>   | 1,78288694 | 0,0001262  |
| Elk3, member of ets oncogene family                                                                                                                                                                                                       | <i>Elk3</i>                       | 1,7825918  | 3,04e-05   |
| Leukotriene a4 hydrolase                                                                                                                                                                                                                  | <i>Lta4h</i>                      | 1,78214818 | 7,87e-06   |
| Myosin x                                                                                                                                                                                                                                  | <i>Myo10</i>                      | 1,78190646 | 5,47e-05   |
| Rad51 homolog c                                                                                                                                                                                                                           | <i>Rad51c</i>                     | 1,78130428 | 0,0022653  |
| Elongator acetyltransferase complex subunit 2                                                                                                                                                                                             | <i>Elp2</i>                       | 1,78086404 | 1,31e-05   |
| Nucleolar and spindle associated protein 1                                                                                                                                                                                                | <i>Nusap1</i>                     | 1,7797091  | 6,43e-05   |
| Nedd4 family interacting protein 1                                                                                                                                                                                                        | <i>Ndfip1</i>                     | 1,77956645 | 0,0012203  |
| Retinoic acid induced 14                                                                                                                                                                                                                  | <i>Rai14</i>                      | 1,77920191 | 0,00039006 |
| Activating signal cointegrator 1 complex subunit 2                                                                                                                                                                                        | <i>Ascc2</i>                      | 1,77861152 | 3,36e-05   |
| Solute carrier family 25, member 46                                                                                                                                                                                                       | <i>Slc25a46</i>                   | 1,77853995 | 0,0016517  |
| Small proline-rich protein 2i                                                                                                                                                                                                             | <i>Sprr2i</i>                     | 1,77788001 | 0,00150101 |
| Peptidylglycine alpha-amidating monooxygenase                                                                                                                                                                                             | <i>Pam</i>                        | 1,77756572 | 0,00142281 |
| Myosin, light polypeptide 6, alkali, smooth muscle and non-muscle pseudogene /// myosin light polypeptide 6 alkali smooth muscle and non-muscle protein, pseudogene /// myosin, light polypeptide 6, alkali, smooth muscle and non-muscle | <i>Gm5526 /// gm8894 /// myl6</i> | 1,77693894 | 1,64e-05   |
| Aha1, activator of heat shock protein atpase 2                                                                                                                                                                                            | <i>Ahsa2</i>                      | 1,7762981  | 2,48e-05   |
| Predicted gene 4887 /// twinfilin, actin-binding protein, homolog 1 (drosophila)                                                                                                                                                          | <i>Gm4887 /// twf1</i>            | 1,77610078 | 0,00947341 |
| Interleukin 6 receptor, alpha                                                                                                                                                                                                             | <i>Il6ra</i>                      | 1,77563699 | 0,00032806 |
| Nitric oxide synthase 1, neuronal                                                                                                                                                                                                         | <i>Nos1</i>                       | 1,77558992 | 0,00035435 |
| Rho gdp dissociation inhibitor (gdi) alpha                                                                                                                                                                                                | <i>Arhgdia</i>                    | 1,77546538 | 0,00104054 |
| Solute carrier family 4 (anion exchanger), member 8                                                                                                                                                                                       | <i>Slc4a8</i>                     | 1,77524386 | 0,0001915  |
| Nuclear receptor subfamily 3, group c, member 1                                                                                                                                                                                           | <i>Nr3c1</i>                      | 1,77515884 | 0,00015625 |
| Ets variant 5                                                                                                                                                                                                                             | <i>Etv5</i>                       | 1,77432111 | 0,00010353 |
| Myosin ic                                                                                                                                                                                                                                 | <i>Myo1c</i>                      | 1,7730764  | 0,00037248 |
| Jerky                                                                                                                                                                                                                                     | <i>Jrk</i>                        | 1,77287922 | 9,57e-06   |
| Solute carrier family 46, member 1                                                                                                                                                                                                        | <i>Slc46a1</i>                    | 1,77282336 | 0,00110602 |

|                                                                                                                                                                                                                                                                    |                                                                                                                                                                    |            |            |
|--------------------------------------------------------------------------------------------------------------------------------------------------------------------------------------------------------------------------------------------------------------------|--------------------------------------------------------------------------------------------------------------------------------------------------------------------|------------|------------|
| Adenylate cyclase 7                                                                                                                                                                                                                                                | <i>Adcy7</i>                                                                                                                                                       | 1,77241731 | 0,00023466 |
| Hydroxyacid oxidase 1, liver                                                                                                                                                                                                                                       | <i>Hao1</i>                                                                                                                                                        | 1,7723014  | 0,00391993 |
| Crystallin, zeta                                                                                                                                                                                                                                                   | <i>Cryz</i>                                                                                                                                                        | 1,77138222 | 5,20e-06   |
| Zinc finger protein 759                                                                                                                                                                                                                                            | <i>Zfp759</i>                                                                                                                                                      | 1,76982235 | 0,00054019 |
| Casp2 and ripk1 domain containing adaptor with death domain                                                                                                                                                                                                        | <i>Cradd</i>                                                                                                                                                       | 1,76792311 | 0,00120206 |
| Nuclear factor of kappa light polypeptide gene enhancer in b cells inhibitor, alpha                                                                                                                                                                                | <i>Nfkbia</i>                                                                                                                                                      | 1,7676123  | 0,00011443 |
| Arginine/serine-rich coiled-coil 1                                                                                                                                                                                                                                 | <i>Rsrc1</i>                                                                                                                                                       | 1,76757407 | 0,00036328 |
| Atpase, class v, type 10a                                                                                                                                                                                                                                          | <i>Atp10a</i>                                                                                                                                                      | 1,76703452 | 0,00419233 |
| Protocadherin alpha 1 /// protocadherin alpha 10 /// protocadherin alpha 11 /// protocadherin alpha 12 /// protocadherin alpha 2 /// protocadherin alpha 4 /// protocadherin alpha 9 /// protocadherin alpha subfamily c, 1 /// protocadherin alpha subfamily c, 2 | <i>Pcdha1</i> /// <i>pcdha10</i> /// <i>pcdha11</i> /// <i>pcdha12</i> /// <i>pcdha2</i> /// <i>pcdha4</i> /// <i>pcdha9</i> /// <i>pcdhac1</i> /// <i>pcdhac2</i> | 1,76693946 | 0,00079675 |
| Gamma-aminobutyric acid (gaba) a receptor-associated protein-like 1                                                                                                                                                                                                | <i>Gabarapl1</i>                                                                                                                                                   | 1,76656963 | 1,60e-05   |
| Mitogen-activated protein kinase kinase 2                                                                                                                                                                                                                          | <i>Map2k2</i>                                                                                                                                                      | 1,76458771 | 0,00023654 |
| Interferon-induced protein 35                                                                                                                                                                                                                                      | <i>Ifi35</i>                                                                                                                                                       | 1,764183   | 2,87e-05   |
| Mitochondrial calcium uptake 1                                                                                                                                                                                                                                     | <i>Micu1</i>                                                                                                                                                       | 1,76392486 | 2,77e-05   |
| Armado repeat containing, x-linked 5                                                                                                                                                                                                                               | <i>Armcx5</i>                                                                                                                                                      | 1,76309948 | 0,00285018 |
| Trna methyltransferase 1 like                                                                                                                                                                                                                                      | <i>Trmt1l</i>                                                                                                                                                      | 1,76293014 | 0,00010304 |
| Yip1 domain family, member 5                                                                                                                                                                                                                                       | <i>Yipf5</i>                                                                                                                                                       | 1,76292751 | 0,0003164  |
| Solute carrier family 29 (nucleoside transporters), member 3                                                                                                                                                                                                       | <i>Slc29a3</i>                                                                                                                                                     | 1,762762   | 1,50e-05   |
| High mobility group nucleosomal binding domain 3                                                                                                                                                                                                                   | <i>Hmgcn3</i>                                                                                                                                                      | 1,76222267 | 9,87e-05   |
| Polymerase (dna directed), kappa                                                                                                                                                                                                                                   | <i>Polk</i>                                                                                                                                                        | 1,76176311 | 0,00150659 |
| Protocadherin beta 17                                                                                                                                                                                                                                              | <i>Pcdhb17</i>                                                                                                                                                     | 1,76136775 | 0,00032337 |
| Testis expressed gene 261                                                                                                                                                                                                                                          | <i>Tex261</i>                                                                                                                                                      | 1,76105396 | 4,04e-05   |
| Nuclear receptor subfamily 2, group c, member 1                                                                                                                                                                                                                    | <i>Nr2c1</i>                                                                                                                                                       | 1,76097366 | 0,00025641 |
| Transmembrane bax inhibitor motif containing 4                                                                                                                                                                                                                     | <i>Tmbim4</i>                                                                                                                                                      | 1,76061323 | 4,61e-05   |
| Required for meiotic nuclear division 1 pseudogene /// required for meiotic nuclear division 1 homolog (s. Cerevisiae)                                                                                                                                             | <i>Gm5512</i> /// <i>rmnd1</i>                                                                                                                                     | 1,76039741 | 3,04e-05   |
| Fun14 domain containing 1                                                                                                                                                                                                                                          | <i>Fundc1</i>                                                                                                                                                      | 1,76011512 | 0,00122633 |
| Choline kinase beta                                                                                                                                                                                                                                                | <i>Chkb</i>                                                                                                                                                        | 1,75974853 | 7,29e-06   |
| Wd repeat domain 36                                                                                                                                                                                                                                                | <i>Wdr36</i>                                                                                                                                                       | 1,75893837 | 3,80e-05   |
| Pleckstrin homology-like domain, family a, member 3                                                                                                                                                                                                                | <i>Phlda3</i>                                                                                                                                                      | 1,75782228 | 0,00012829 |
| Lectin, galactose binding, soluble 8                                                                                                                                                                                                                               | <i>Lgals8</i>                                                                                                                                                      | 1,75753954 | 0,00513337 |
| Gata binding protein 4                                                                                                                                                                                                                                             | <i>Gata4</i>                                                                                                                                                       | 1,75738852 | 0,00031561 |
| Family with sequence similarity 114, member a1                                                                                                                                                                                                                     | <i>Fam114a1</i>                                                                                                                                                    | 1,75676555 | 2,12e-05   |
| Myosin, light polypeptide 9, regulatory                                                                                                                                                                                                                            | <i>Myl9</i>                                                                                                                                                        | 1,75497514 | 0,00016812 |
| Biogenesis of lysosomal organelles complex-1, subunit 5, muted                                                                                                                                                                                                     | <i>Bloc1s5</i>                                                                                                                                                     | 1,75442815 | 5,89e-05   |
| Glucosamine-6-phosphate deaminase 1                                                                                                                                                                                                                                | <i>Gnpda1</i>                                                                                                                                                      | 1,75384537 | 1,89e-05   |
| Phosphatidylinositol 4-kinase, catalytic, alpha polypeptide                                                                                                                                                                                                        | <i>Pi4ka</i>                                                                                                                                                       | 1,75344987 | 8,19e-06   |
| Praja ring finger 1, e3 ubiquitin protein ligase                                                                                                                                                                                                                   | <i>Pja1</i>                                                                                                                                                        | 1,75146946 | 0,00146874 |



|                                                                                                  |                                  |            |            |
|--------------------------------------------------------------------------------------------------|----------------------------------|------------|------------|
| Sh3-domain grb2-like 3                                                                           | <i>Sh3gl3</i>                    | 1,75049819 | 0,00556211 |
| Transcription factor ap-2, alpha                                                                 | <i>Tfap2a</i>                    | 1,75013133 | 0,00034711 |
| Nadh dehydrogenase (ubiquinone) 1 beta subcomplex, 7                                             | <i>Ndufb7</i>                    | 1,74817665 | 6,66e-05   |
| Suppressor of cytokine signaling 1                                                               | <i>Socs1</i>                     | 1,74815945 | 6,03e-05   |
| Pdz domain containing ring finger 3                                                              | <i>Pdzrn3</i>                    | 1,74761317 | 0,00031747 |
| Hyaluronoglucosaminidase 1 /// n-acetyltransferase 6                                             | <i>Hyal1 /// nat6</i>            | 1,7473769  | 5,45e-05   |
| Isy1 splicing factor homolog (s. Cerevisiae)                                                     | <i>Isy1</i>                      | 1,74554222 | 0,00030919 |
| Transformed mouse 3t3 cell double minute 4                                                       | <i>Mdm4</i>                      | 1,74423021 | 2,76e-05   |
| Solute carrier family 39 (metal ion transporter), member 6                                       | <i>Slc39a6</i>                   | 1,74343096 | 0,00047505 |
| Cask-interacting protein 2                                                                       | <i>Caskin2</i>                   | 1,74230298 | 5,87e-05   |
| Regulation of nuclear pre-mrna domain containing 1a                                              | <i>Rprd1a</i>                    | 1,74197872 | 0,00219843 |
| Protein tyrosine phosphatase, receptor type, t                                                   | <i>Ptprt</i>                     | 1,74091041 | 0,00024242 |
| Forkhead box p2                                                                                  | <i>Foxp2</i>                     | 1,74037453 | 0,00108249 |
| Fms-like tyrosine kinase 3 ligand /// ribosomal protein l13a                                     | <i>Flt3l /// rpl13a</i>          | 1,73995106 | 0,00161043 |
| Retinoic acid induced 2                                                                          | <i>Rai2</i>                      | 1,73981285 | 0,00025229 |
| Uncharacterized loc100135765 /// phosphatidylinositol glycan anchor biosynthesis, class b        | <i>Loc100135765 /// pigb</i>     | 1,73898722 | 0,00034072 |
| Mckusick-kaufman syndrome                                                                        | <i>Mkks</i>                      | 1,73863891 | 4,00e-05   |
| Myeloid/lymphoid or mixed-lineage leukemia (trithorax homolog, drosophila); translocated to, 3   | <i>Mllt3</i>                     | 1,73763648 | 4,41e-05   |
| Ankyrin repeat and kh domain containing 1                                                        | <i>Ankhd1</i>                    | 1,73734362 | 2,61e-05   |
| Apolipoprotein o-like                                                                            | <i>Apool</i>                     | 1,73729062 | 2,47e-05   |
| Family with sequence similarity 207, member a                                                    | <i>Fam207a</i>                   | 1,73629107 | 7,05e-05   |
| Ddb1 and cul4 associated factor 4                                                                | <i>Dcaf4</i>                     | 1,73493898 | 0,00026611 |
| Haus augmin-like complex, subunit 1                                                              | <i>Haus1</i>                     | 1,73487307 | 2,29e-05   |
| Riken cdna 6430548m08 gene                                                                       | <i>6430548m08rik</i>             | 1,73455507 | 1,72e-05   |
| Target of myb1-like 1 (chicken)                                                                  | <i>Tom1l1</i>                    | 1,73440119 | 0,00020704 |
| Ras and rab interactor 2                                                                         | <i>Rin2</i>                      | 1,7343599  | 6,87e-05   |
| Treacher collins franceschetti syndrome 1, homolog                                               | <i>Tcof1</i>                     | 1,73316505 | 0,00034995 |
| Protein sfi1 homolog /// sfi1 homolog, spindle assembly associated (yeast)                       | <i>Loc100861749 /// sfi1</i>     | 1,73306652 | 6,61e-05   |
| Asparagine-linked glycosylation 12 (alpha-1,6-mannosyltransferase)                               | <i>Alg12</i>                     | 1,73287127 | 0,00027676 |
| Zinc finger swim-type containing 7                                                               | <i>Zswim7</i>                    | 1,73228176 | 7,76e-05   |
| Vesicle transport through interaction with t-snares 1b                                           | <i>Vti1b</i>                     | 1,73150931 | 2,42e-05   |
| Protein arginine n-methyltransferase 2                                                           | <i>Prmt2</i>                     | 1,73148238 | 7,40e-05   |
| Enolase 3, beta muscle                                                                           | <i>Eno3</i>                      | 1,7308036  | 6,23e-05   |
| Aminolevulinic acid synthase 1                                                                   | <i>Alas1</i>                     | 1,72976645 | 2,38e-05   |
| Fc fragment of igg binding protein                                                               | <i>Fcgbp</i>                     | 1,72965123 | 0,00078875 |
| Trafficking protein particle complex subunit 10-like /// trafficking protein particle complex 10 | <i>Loc102641872 /// trappc10</i> | 1,7294913  | 1,60e-05   |
| Ral gef with ph domain and sh3 binding motif 2                                                   | <i>Ralgs2</i>                    | 1,72929749 | 0,00265141 |
| Acyl-coenzyme a oxidase 3, pristanoyl                                                            | <i>Acox3</i>                     | 1,72926216 | 0,00086747 |
| Protease-associated domain containing 1                                                          | <i>Pradc1</i>                    | 1,7292047  | 4,51e-05   |
| Max dimerization protein 4                                                                       | <i>Mxd4</i>                      | 1,72895637 | 9,04e-05   |

|                                                                                                                                          |                                                  |            |            |
|------------------------------------------------------------------------------------------------------------------------------------------|--------------------------------------------------|------------|------------|
| Male-specific lethal 1 homolog (drosophila)                                                                                              | <i>Msl1</i>                                      | 1,72839701 | 0,00012121 |
| Riken cdna c920025e04 gene /// histocompatibility 2, t region locus 23 /// h-2 class i histocompatibility antigen, d-37 alpha chain-like | <i>C920025e04rik /// h2-t23 /// loc102641046</i> | 1,72729659 | 0,00018131 |
| Coatomer protein complex, subunit zeta 1                                                                                                 | <i>Copz1</i>                                     | 1,72711367 | 6,78e-06   |
| Negative elongation factor complex member c/d, th1l                                                                                      | <i>Nelfcd</i>                                    | 1,72668711 | 1,50e-05   |
| Proline rich 14                                                                                                                          | <i>Prr14</i>                                     | 1,72569114 | 4,65e-05   |
| Ankyrin repeat domain 6                                                                                                                  | <i>Ankrd6</i>                                    | 1,72566827 | 0,00351512 |
| Patatin-like phospholipase domain containing 7                                                                                           | <i>Pnpla7</i>                                    | 1,72548378 | 0,00017049 |
| Tubulin, beta 6 class v                                                                                                                  | <i>Tubb6</i>                                     | 1,72410289 | 1,31e-05   |
| Inositol polyphosphate 5-phosphatase k                                                                                                   | <i>Inpp5k</i>                                    | 1,72327957 | 2,21e-05   |
| Pre b cell leukemia homeobox 3                                                                                                           | <i>Pbx3</i>                                      | 1,72316396 | 1,09e-05   |
| Tumor necrosis factor receptor superfamily, member 21                                                                                    | <i>Tnfrsf21</i>                                  | 1,72237017 | 0,00014688 |
| Solute carrier family 35, member a4                                                                                                      | <i>Slc35a4</i>                                   | 1,72227899 | 0,00027158 |
| Glutathione s-transferase, mu 5                                                                                                          | <i>Gstm5</i>                                     | 1,72161491 | 8,55e-05   |
| 3'-phosphoadenosine 5'-phosphosulfate synthase 1                                                                                         | <i>Papss1</i>                                    | 1,72069677 | 4,77e-05   |
| Solute carrier organic anion transporter family, member 5a1                                                                              | <i>Slco5a1</i>                                   | 1,720394   | 6,26e-05   |
| Stomatin                                                                                                                                 | <i>Stom</i>                                      | 1,7201485  | 0,00996776 |
| Special at-rich sequence binding protein 2                                                                                               | <i>Satb2</i>                                     | 1,72007837 | 9,87e-05   |
| Tissue factor pathway inhibitor                                                                                                          | <i>Tfpi</i>                                      | 1,71978791 | 0,00897341 |
| Kinesin family member 16b                                                                                                                | <i>Kif16b</i>                                    | 1,71598691 | 0,00573541 |
| Las1-like (s. Cerevisiae)                                                                                                                | <i>Las1l</i>                                     | 1,71589803 | 2,55e-05   |
| Atp synthase, h+ transporting, mitochondrial f1 complex, delta subunit                                                                   | <i>Atp5d</i>                                     | 1,71523023 | 2,76e-05   |
| Gem (nuclear organelle) associated protein 8                                                                                             | <i>Gemin8</i>                                    | 1,71483243 | 0,00051068 |
| Nadh dehydrogenase (ubiquinone) fe-s protein 7                                                                                           | <i>Ndufs7</i>                                    | 1,71410635 | 4,88e-05   |
| Pyruvate dehydrogenase kinase, isoenzyme 4                                                                                               | <i>Pdk4</i>                                      | 1,7138099  | 6,27e-05   |
| Centrin 2                                                                                                                                | <i>Cetn2</i>                                     | 1,71281911 | 4,66e-05   |
| Budding uninhibited by benzimidazoles 1 homolog, beta (s. Cerevisiae)                                                                    | <i>Bub1b</i>                                     | 1,71131535 | 4,04e-05   |
| Nuclear factor of activated t cells, cytoplasmic, calcineurin dependent 1                                                                | <i>Nfatc1</i>                                    | 1,71090006 | 0,00013443 |
| Adenomatosis polyposis coli down-regulated 1                                                                                             | <i>Apcdd1</i>                                    | 1,7106333  | 0,00759188 |
| Cxxc finger 1 (phd domain)                                                                                                               | <i>Cxxc1</i>                                     | 1,71053846 | 2,55e-05   |
| T cell leukemia translocation altered gene                                                                                               | <i>Tcta</i>                                      | 1,71028894 | 1,96e-05   |
| Actin related protein 2/3 complex, subunit 4                                                                                             | <i>Arpc4</i>                                     | 1,70867373 | 8,72e-05   |
| Non-smc condensin i complex, subunit d2                                                                                                  | <i>Ncapd2</i>                                    | 1,70822064 | 8,35e-05   |
| Delta/notch-like egf-related receptor                                                                                                    | <i>Dner</i>                                      | 1,70763236 | 0,0074881  |
| Forkhead box n1                                                                                                                          | <i>Foxn1</i>                                     | 1,70699841 | 0,00024476 |
| Predicted gene 14277 /// small nuclear ribonucleoprotein d1                                                                              | <i>Gm14277 /// snrpd1</i>                        | 1,70695393 | 1,09e-05   |
| Chondroitin polymerizing factor 2                                                                                                        | <i>Chpf2</i>                                     | 1,70685362 | 0,00085073 |
| Oral-facial-digital syndrome 1 gene homolog (human)                                                                                      | <i>Ofd1</i>                                      | 1,70666865 | 0,0010494  |
| Udp-glucose pyrophosphorylase 2                                                                                                          | <i>Ugp2</i>                                      | 1,70646641 | 3,07e-05   |
| Sec16 homolog b (s. Cerevisiae)                                                                                                          | <i>Sec16b</i>                                    | 1,70623542 | 0,00045761 |
| Cellular repressor of e1a-stimulated genes 1                                                                                             | <i>Creg1</i>                                     | 1,70588116 | 0,00049409 |

|                                                                                                                                              |                                                        |            |            |
|----------------------------------------------------------------------------------------------------------------------------------------------|--------------------------------------------------------|------------|------------|
| Cyclin b2                                                                                                                                    | <i>Ccnb2</i>                                           | 1,70580097 | 2,50e-05   |
| Coiled-coil domain containing 71 like                                                                                                        | <i>Ccdc71l</i>                                         | 1,70577256 | 0,00017438 |
| Cyclin a2                                                                                                                                    | <i>Ccna2</i>                                           | 1,70522718 | 0,00103975 |
| Tao kinase 1                                                                                                                                 | <i>Taok1</i>                                           | 1,70466687 | 3,55e-05   |
| Family with sequence similarity 43, member a                                                                                                 | <i>Fam43a</i>                                          | 1,70436983 | 4,78e-05   |
| Calcium binding protein 39-like                                                                                                              | <i>Cab39l</i>                                          | 1,70380813 | 0,00050875 |
| Family with sequence similarity 64, member a                                                                                                 | <i>Fam64a</i>                                          | 1,70376598 | 4,33e-05   |
| Myotubularin related protein 9                                                                                                               | <i>Mtmr9</i>                                           | 1,70329374 | 0,00117321 |
| Phosphatidylserine decarboxylase ///<br>phosphatidylserine decarboxylase, pseudogene 1 ///<br>phosphatidylserine decarboxylase, pseudogene 3 | <i>Pisd</i> /// <i>pisd-ps1</i> ///<br><i>pisd-ps3</i> | 1,70262169 | 1,92e-05   |
| Imp1 inner mitochondrial membrane peptidase-like (s. Cerevisiae)                                                                             | <i>Immp1l</i>                                          | 1,7008647  | 0,00077632 |
| Proteasome (prosome, macropain) activator subunit 4                                                                                          | <i>Psme4</i>                                           | 1,69956388 | 0,00013222 |
| Golgi associated, gamma adaptin ear containing, arf binding protein 1                                                                        | <i>Gga1</i>                                            | 1,69897591 | 8,52e-05   |
| Zinc finger protein 397                                                                                                                      | <i>Zfp397</i>                                          | 1,69881517 | 0,00013339 |
| Melanoma antigen, family d, 2                                                                                                                | <i>Maged2</i>                                          | 1,69880738 | 1,17e-05   |
| ATPase, H <sup>+</sup> transporting, lysosomal v0 subunit a1                                                                                 | <i>ATP6v0a1</i>                                        | 1,69736491 | 0,00010739 |
| Netrin 4                                                                                                                                     | <i>Ntn4</i>                                            | 1,69687266 | 0,00229246 |
| Excision repair cross-complementing rodent repair deficiency complementation group 6 like                                                    | <i>Ercc6l</i>                                          | 1,69683113 | 2,43e-05   |
| Fidgetin                                                                                                                                     | <i>Fign</i>                                            | 1,69671402 | 0,0023225  |
| Ubiquinol-cytochrome c reductase, complex iii subunit xi                                                                                     | <i>Uqcrl1</i>                                          | 1,6962055  | 0,00021008 |
| Cdna sequence bc022687                                                                                                                       | <i>Bc022687</i>                                        | 1,69615709 | 0,00035508 |
| Phosphatidylinositol transfer protein, membrane-associated 2                                                                                 | <i>Pitpnm2</i>                                         | 1,69564039 | 0,00391273 |
| Ellis van Creveld gene syndrome                                                                                                              | <i>Evc</i>                                             | 1,69547569 | 0,00284043 |
| Riken cdna 2210418o10 gene                                                                                                                   | <i>2210418o10rik</i>                                   | 1,69425154 | 0,00276494 |
| IdnK gluconokinase homolog (e. coli)                                                                                                         | <i>Idnk</i>                                            | 1,69420217 | 5,14e-05   |
| Mitochondrial ribosomal protein l42                                                                                                          | <i>Mrpl42</i>                                          | 1,69406276 | 2,43e-05   |
| Polymerase (rna) iii (dna directed) polypeptide k                                                                                            | <i>Polr3k</i>                                          | 1,69274808 | 0,00045627 |
| X-linked lymphocyte-regulated 3a /// x-linked lymphocyte-regulated 3b /// x-linked lymphocyte-regulated 3c                                   | <i>Xlr3a</i> /// <i>xlr3b</i> ///<br><i>xlr3c</i>      | 1,6920725  | 0,00013127 |
| Vacuolar protein sorting 28 (yeast)                                                                                                          | <i>Vps28</i>                                           | 1,69205445 | 2,28e-05   |
| Non-smc element 1 homolog (s. Cerevisiae)                                                                                                    | <i>Nsmce1</i>                                          | 1,69033592 | 4,45e-05   |
| Ww domain binding protein 2                                                                                                                  | <i>Wbp2</i>                                            | 1,68968799 | 0,00011899 |
| Hyaluronan mediated motility receptor (rhamm)                                                                                                | <i>Hmmr</i>                                            | 1,68946575 | 6,83e-05   |
| Sodium channel modifier 1                                                                                                                    | <i>Scnm1</i>                                           | 1,68926578 | 0,00023652 |
| Riken cdna 2310030g06 gene                                                                                                                   | <i>2310030g06rik</i>                                   | 1,68898363 | 0,00093044 |
| Riken cdna 4930430f08 gene                                                                                                                   | <i>4930430f08rik</i>                                   | 1,68887195 | 0,00113761 |
| Sh3-binding kinase 1                                                                                                                         | <i>Sbk1</i>                                            | 1,68868053 | 0,00021658 |
| Mesoderm induction early response 1, family member 2                                                                                         | <i>Mier2</i>                                           | 1,68847921 | 4,61e-05   |
| Rho-associated coiled-coil containing protein kinase 2                                                                                       | <i>Rock2</i>                                           | 1,68712743 | 6,26e-05   |
| Glutamate receptor, ionotropic, ampa1 (alpha 1)                                                                                              | <i>Gria1</i>                                           | 1,68657459 | 0,00049114 |

|                                                                       |                              |            |            |
|-----------------------------------------------------------------------|------------------------------|------------|------------|
| Riken cDNA 2510002d24 gene                                            | <i>2510002d24rik</i>         | 1,68516894 | 0,00037796 |
| Guanine nucleotide binding protein, alpha 11                          | <i>Gna11</i>                 | 1,68512558 | 3,84e-05   |
| Polymerase (RNA) II (DNA directed) polypeptide d                      | <i>Polr2d</i>                | 1,68450121 | 4,54e-05   |
| Coenzyme Q10 homolog A (yeast)                                        | <i>Coq10a</i>                | 1,68364297 | 1,10e-05   |
| Kinesin family member 21A                                             | <i>Kif21a</i>                | 1,68242648 | 0,00012763 |
| Cd14 antigen                                                          | <i>Cd14</i>                  | 1,68215204 | 8,23e-06   |
| tRNA aspartic acid methyltransferase 1                                | <i>Trdmt1</i>                | 1,68109908 | 0,00819458 |
| 5'-nucleotidase domain containing 3                                   | <i>Nt5dc3</i>                | 1,68103188 | 0,00013176 |
| F-box protein 17                                                      | <i>Fbxo17</i>                | 1,68067808 | 0,00220535 |
| Chromobox 8                                                           | <i>Cbx8</i>                  | 1,67905601 | 0,00155359 |
| Replication protein A1                                                | <i>Rpa1</i>                  | 1,67848318 | 0,00102596 |
| Paired box 6                                                          | <i>Pax6</i>                  | 1,67817891 | 0,00244386 |
| TATA box binding protein (TBP)-associated factor, RNA polymerase I, A | <i>Taf1a</i>                 | 1,67764819 | 0,0001909  |
| Abhydrolase domain containing 12                                      | <i>Abhd12</i>                | 1,67640669 | 0,00101818 |
| 2,3-bisphosphoglycerate mutase                                        | <i>Bpgm</i>                  | 1,67639172 | 0,00645999 |
| Tubulin, alpha 3A /// tubulin, alpha 3B                               | <i>Tuba3a /// tuba3b</i>     | 1,67636236 | 6,66e-05   |
| A disintegrin and metalloproteinase domain 15 (metargidin)            | <i>Adam15</i>                | 1,67602053 | 8,84e-05   |
| Activating signal integrator 1 complex subunit 1                      | <i>Ascc1</i>                 | 1,67572108 | 0,00104038 |
| Synaptotagmin XI                                                      | <i>Syt11</i>                 | 1,67528479 | 0,00099472 |
| NADH dehydrogenase (ubiquinone) 1 alpha subcomplex, 2                 | <i>Ndufa2</i>                | 1,67527112 | 3,49e-05   |
| Phosphatidylinositol-5-phosphate 4-kinase, type II, gamma             | <i>Pip4k2c</i>               | 1,67460901 | 0,000649   |
| Family with sequence similarity 83, member G                          | <i>Fam83g</i>                | 1,67326233 | 5,84e-05   |
| Sh3-domain kinase binding protein 1                                   | <i>Sh3kbp1</i>               | 1,67157676 | 4,18e-05   |
| N-ethylmaleimide sensitive fusion protein                             | <i>Nsf</i>                   | 1,6714461  | 0,00010518 |
| Testis expressed gene 2                                               | <i>Tex2</i>                  | 1,67049444 | 0,00024326 |
| TDP-glucose 4,6-dehydratase                                           | <i>Tgds</i>                  | 1,67004809 | 0,00224586 |
| Nucleoporin 37                                                        | <i>Nup37</i>                 | 1,66950544 | 3,62e-05   |
| 6-phosphofructo-2-kinase/fructose-2,6-bisphosphatase 1                | <i>Pfkfb1</i>                | 1,66931461 | 0,0004126  |
| Slc10A3-UBL4 readthrough /// ubiquitin-like 4                         | <i>Slc10a3-ubl4 /// ubl4</i> | 1,66912608 | 6,40e-05   |
| Nfu1 iron-sulfur cluster scaffold homolog (S. cerevisiae)             | <i>Nfu1</i>                  | 1,66909726 | 6,22e-05   |
| RNA binding motif protein 22                                          | <i>Rbm22</i>                 | 1,66899565 | 0,00013512 |
| Gli pathogenesis-related 2                                            | <i>Glpr2</i>                 | 1,66817066 | 0,00011844 |
| Calcium/calmodulin-dependent protein kinase II gamma                  | <i>Camk2g</i>                | 1,66782177 | 7,53e-05   |
| DNA fragmentation factor, alpha subunit                               | <i>Dffa</i>                  | 1,66775138 | 0,00053122 |
| Mitogen-activated protein kinase kinase kinase 1                      | <i>Map3k1</i>                | 1,66749315 | 0,00081812 |
| NADH dehydrogenase (ubiquinone) 1 beta subcomplex, 5                  | <i>Ndufb5</i>                | 1,66746643 | 2,66e-05   |
| Sorbin and SH3 domain containing 3                                    | <i>Sorbs3</i>                | 1,66649141 | 0,00161879 |
| Transformation related protein 53                                     | <i>Trp53</i>                 | 1,66637266 | 0,00083681 |
| PDZ and LIM domain 5                                                  | <i>Pdlim5</i>                | 1,66535055 | 4,32e-05   |
| Coronin 6                                                             | <i>Coro6</i>                 | 1,66493425 | 0,00370325 |

|                                                                                               |                          |            |            |
|-----------------------------------------------------------------------------------------------|--------------------------|------------|------------|
| Riken cdna 2700094k13 gene                                                                    | <i>2700094k13rik</i>     | 1,66464274 | 8,10e-05   |
| Glycoprotein (transmembrane) nmb                                                              | <i>Gpnmmb</i>            | 1,66350502 | 1,60e-05   |
| Sorbin and sh3 domain containing 1                                                            | <i>Sorbs1</i>            | 1,66287993 | 0,00298254 |
| Churchill domain containing 1                                                                 | <i>Churc1</i>            | 1,66278137 | 0,00024765 |
| Procollagen c-endopeptidase enhancer protein                                                  | <i>Pcolce</i>            | 1,66276065 | 0,00025197 |
| G protein-coupled receptor 89                                                                 | <i>Gpr89</i>             | 1,66265342 | 3,09e-05   |
| Nuclear factor i/a                                                                            | <i>Nfia</i>              | 1,66247375 | 0,00043243 |
| Myosin ie                                                                                     | <i>Myo1e</i>             | 1,66145905 | 0,00019796 |
| Atp synthase, h+ transporting, mitochondrial f1 complex, epsilon subunit                      | <i>Atp5e</i>             | 1,66120577 | 0,00045609 |
| Zinc fingers and homeoboxes 1                                                                 | <i>Zhx1</i>              | 1,66114678 | 0,00042552 |
| Secretion regulating guanine nucleotide exchange factor                                       | <i>Sergef</i>            | 1,6606879  | 8,42e-05   |
| Mevalonate kinase                                                                             | <i>Mvk</i>               | 1,65980318 | 0,00016109 |
| Ring finger protein 138                                                                       | <i>Rnf138</i>            | 1,65941524 | 0,00392192 |
| Hras-like suppressor                                                                          | <i>Hrasls</i>            | 1,65870264 | 0,00044289 |
| Antigen identified by monoclonal antibody ki 67                                               | <i>Mki67</i>             | 1,65796813 | 1,47e-05   |
| Deafness, autosomal dominant 5 (human)                                                        | <i>Dfna5</i>             | 1,6579035  | 0,00201699 |
| Regulator of calcineurin 3                                                                    | <i>Rcan3</i>             | 1,65739141 | 0,00036915 |
| Zinc finger with ufm1-specific peptidase domain                                               | <i>Zufsp</i>             | 1,65731481 | 2,10e-05   |
| 5'-nucleotidase domain containing 2                                                           | <i>Nt5dc2</i>            | 1,65695293 | 0,00021518 |
| Mitochondrial fission regulator 2                                                             | <i>Mtfr2</i>             | 1,65638822 | 0,00273404 |
| Ring finger protein 145                                                                       | <i>Rnf145</i>            | 1,65611914 | 3,94e-05   |
| Tubulin, delta 1                                                                              | <i>Tubd1</i>             | 1,65571707 | 0,00227479 |
| Inositol 1,3,4-triphosphate 5/6 kinase                                                        | <i>Itpk1</i>             | 1,65558749 | 6,07e-05   |
| Midnolin                                                                                      | <i>Midn</i>              | 1,65426918 | 0,00023466 |
| Arfgap with fg repeats 2                                                                      | <i>Agfg2</i>             | 1,65388226 | 0,00020686 |
| Centromere protein f                                                                          | <i>Cenpf</i>             | 1,65345587 | 0,00011443 |
| Glucosamine-6-phosphate deaminase 1 pseudogene /// glucosamine-6-phosphate deaminase 1        | <i>Gm8615 /// gnpda1</i> | 1,65181745 | 0,00013264 |
| Spectrin repeat containing, nuclear envelope 2                                                | <i>Syne2</i>             | 1,6516199  | 0,00049387 |
| Neuronal pentraxin chromo domain /// neuronal pentraxin receptor                              | <i>Npcd /// nptxr</i>    | 1,65155884 | 0,00090869 |
| Ribonuclease, rnase k                                                                         | <i>Rnasek</i>            | 1,6515071  | 0,00016512 |
| Aurora kinase b                                                                               | <i>Aurkb</i>             | 1,65112889 | 0,00025078 |
| Checkpoint kinase 2                                                                           | <i>Chek2</i>             | 1,65109373 | 0,0007617  |
| Cholecystokinin b receptor                                                                    | <i>Cckbr</i>             | 1,65066946 | 0,00101118 |
| Galanin receptor 3 /// glycine c-acetyltransferase (2-amino-3-ketobutyrate-coenzyme a ligase) | <i>Galr3 /// gcat</i>    | 1,65063289 | 9,88e-05   |
| Chitinase domain containing 1                                                                 | <i>Chid1</i>             | 1,6503318  | 9,37e-05   |
| Septin 9                                                                                      | <i>Ix.09</i>             | 1,65020087 | 0,00071769 |
| Exocyst complex component 7                                                                   | <i>Exoc7</i>             | 1,65002308 | 3,76e-05   |
| Methylmalonic aciduria (cobalamin deficiency) type b homolog (human)                          | <i>Mmab</i>              | 1,64990948 | 0,0004081  |
| Cyclin-dependent kinase inhibitor 2d (p19, inhibits cdk4)                                     | <i>Cdkn2d</i>            | 1,64975357 | 2,63e-05   |
| Ddrgk domain containing 1                                                                     | <i>Ddrgk1</i>            | 1,64956473 | 4,44e-05   |

|                                                                          |                                 |            |            |
|--------------------------------------------------------------------------|---------------------------------|------------|------------|
| Fos-like antigen 1                                                       | <i>Fosl1</i>                    | 1,64925961 | 0,00081464 |
| N-acetyl galactosaminidase, alpha                                        | <i>Naga</i>                     | 1,64814568 | 0,00024211 |
| Ten1 telomerase capping complex subunit                                  | <i>Ten1</i>                     | 1,64779769 | 8,22e-05   |
| Atpase, h <sup>+</sup> transporting, lysosomal v1 subunit d              | <i>Atp6v1d</i>                  | 1,647748   | 6,11e-05   |
| Carbohydrate (keratan sulfate gal-6) sulfotransferase 1                  | <i>Chst1</i>                    | 1,64768519 | 0,00165146 |
| Riken cdna 2700062c07 gene /// predicted gene 9182                       | <i>2700062c07rik /// gm9182</i> | 1,64766756 | 0,00046985 |
| Serine dehydratase-like                                                  | <i>Sdsl</i>                     | 1,64691436 | 3,72e-05   |
| Interferon regulatory factor 5                                           | <i>Irf5</i>                     | 1,64681022 | 0,00178751 |
| Transmembrane protein 5                                                  | <i>Tmem5</i>                    | 1,64634482 | 2,96e-05   |
| Gdp-mannose pyrophosphorylase a                                          | <i>Gmppa</i>                    | 1,6462322  | 4,40e-05   |
| Retinoblastoma-like 1 (p107)                                             | <i>Rbl1</i>                     | 1,64556614 | 0,00029081 |
| Matrix metalloproteinase 11                                              | <i>Mmp11</i>                    | 1,64547577 | 0,0002073  |
| Nerve growth factor receptor (tnfrsf16) associated protein 1             | <i>Ngfrap1</i>                  | 1,64519591 | 2,29e-05   |
| Fragile x mental retardation syndrome 1                                  | <i>Fmr1</i>                     | 1,64472031 | 0,00497219 |
| Sh3 domain ysc-like 1                                                    | <i>Sh3yl1</i>                   | 1,64431627 | 5,22e-05   |
| Bromodomain containing 8                                                 | <i>Brd8</i>                     | 1,64396552 | 8,65e-05   |
| Hect domain and ankyrin repeat containing, e3 ubiquitin protein ligase 1 | <i>Hace1</i>                    | 1,64199791 | 0,00161879 |
| Epithelial membrane protein 2                                            | <i>Emp2</i>                     | 1,64142409 | 0,00023129 |
| Zinc finger, cchc domain containing 18                                   | <i>Zcchc18</i>                  | 1,64080587 | 0,00331724 |
| Tsc22 domain family, member 1                                            | <i>Tsc22d1</i>                  | 1,64043061 | 0,00015141 |
| Wd repeat domain 13                                                      | <i>Wdr13</i>                    | 1,64013893 | 1,64e-05   |
| Emerin                                                                   | <i>Emd</i>                      | 1,63971256 | 0,0001695  |
| Flightless i homolog (drosophila)                                        | <i>Flii</i>                     | 1,63915827 | 0,00017972 |
| Phosphoribosyl pyrophosphate synthetase 2                                | <i>Prps2</i>                    | 1,63811414 | 0,0036941  |
| Insulin-like growth factor 1                                             | <i>Igf1</i>                     | 1,63808868 | 0,00023828 |
| Chloride channel calcium activated 1                                     | <i>Clca1</i>                    | 1,63799059 | 0,0015992  |
| Diazepam binding inhibitor                                               | <i>Dbi</i>                      | 1,63780818 | 3,09e-05   |
| Centrosomal protein 290                                                  | <i>Cep290</i>                   | 1,63776199 | 0,00096564 |
| Phenylalkylamine ca2+ antagonist (emopamil) binding protein              | <i>Ebp</i>                      | 1,63756183 | 8,99e-05   |
| Zinc finger and scan domain containing 21                                | <i>Zscan21</i>                  | 1,6372491  | 0,00012009 |
| Docking protein 1                                                        | <i>Dok1</i>                     | 1,6370501  | 5,21e-05   |
| N-acetyl transferase 1                                                   | <i>Nat1</i>                     | 1,6367212  | 0,00265497 |
| Lactamase, beta 2                                                        | <i>Lactb2</i>                   | 1,63672038 | 0,00613684 |
| Sec23b (s. Cerevisiae)                                                   | <i>Sec23b</i>                   | 1,63671953 | 0,00323509 |
| Morn repeat containing 4                                                 | <i>Morn4</i>                    | 1,63666853 | 0,00113862 |
| Nicolin 1                                                                | <i>Nicn1</i>                    | 1,63621074 | 0,00040402 |
| Extracellular matrix protein 1                                           | <i>Ecm1</i>                     | 1,63581078 | 0,00040787 |
| Wd repeat and socs box-containing 2                                      | <i>Wsb2</i>                     | 1,63565635 | 0,0001208  |
| Coatomer protein complex, subunit gamma 1                                | <i>Copg1</i>                    | 1,63517243 | 9,88e-05   |
| Myosin, light polypeptide 6, alkali, smooth muscle and non-muscle        | <i>Myl6</i>                     | 1,63487947 | 0,0003467  |
| Phospholipase a2, group vi                                               | <i>Pla2g6</i>                   | 1,63450033 | 0,00114692 |
| Structural maintenance of chromosomes 1a                                 | <i>Smc1a</i>                    | 1,63404501 | 3,10e-05   |

|                                                                                                                                                                       |                                                          |            |            |
|-----------------------------------------------------------------------------------------------------------------------------------------------------------------------|----------------------------------------------------------|------------|------------|
| Transmembrane and coiled-coil domains 6                                                                                                                               | <i>Tmco6</i>                                             | 1,63399579 | 8,44e-05   |
| Stam binding protein                                                                                                                                                  | <i>Stampb</i>                                            | 1,63271367 | 0,00682319 |
| Ribonucleotide reductase m2 b (tp53 inducible)                                                                                                                        | <i>Rrm2b</i>                                             | 1,63251295 | 0,00032867 |
| Ribonuclease/angiogenin inhibitor 1                                                                                                                                   | <i>Rnh1</i>                                              | 1,63237534 | 2,58e-05   |
| Josephin domain containing 2                                                                                                                                          | <i>Josd2</i>                                             | 1,63200508 | 0,00122765 |
| Ribosome binding protein 1                                                                                                                                            | <i>Rrbp1</i>                                             | 1,63191569 | 0,00052211 |
| Sperm specific antigen 2                                                                                                                                              | <i>Ssfa2</i>                                             | 1,63160405 | 0,00018131 |
| Mus musculus adult male lung cdna, riken full-length enriched library, clone:1200016e24<br>product:unclassifiable, full insert sequence. ///<br>predicted gene, 20186 | <i>Bc057675</i> ///<br><i>gm20186</i>                    | 1,63154073 | 0,00241646 |
| Tudor domain containing 7                                                                                                                                             | <i>Tdrd7</i>                                             | 1,63137559 | 9,95e-05   |
| Guanine nucleotide binding protein, alpha o                                                                                                                           | <i>Gnao1</i>                                             | 1,63134068 | 0,00952001 |
| Nudix (nucleoside diphosphate linked moiety x)-type motif 6                                                                                                           | <i>Nudt6</i>                                             | 1,63022713 | 0,00085543 |
| Importin 8                                                                                                                                                            | <i>Ipo8</i>                                              | 1,63014334 | 2,21e-05   |
| Dual specificity phosphatase 11 (rna/rnp complex 1-interacting)                                                                                                       | <i>Dusp11</i>                                            | 1,62968769 | 0,00135527 |
| Citron                                                                                                                                                                | <i>Cit</i>                                               | 1,62945186 | 0,0068626  |
| Predicted gene 9840 /// ring-box 1                                                                                                                                    | <i>Gm9840</i> /// <i>rbx1</i>                            | 1,62919887 | 5,40e-05   |
| Asialoglycoprotein receptor 1                                                                                                                                         | <i>Asgr1</i>                                             | 1,62866931 | 0,00512208 |
| Sh3-domain grb2-like endophilin b2                                                                                                                                    | <i>Sh3glb2</i>                                           | 1,62807355 | 3,85e-05   |
| Calcitonin receptor-like                                                                                                                                              | <i>Calclrl</i>                                           | 1,62755106 | 0,00282269 |
| Ankyrin repeat domain 13a                                                                                                                                             | <i>Ankrd13a</i>                                          | 1,62704152 | 3,77e-05   |
| Transcription elongation regulator 1 (ca150)                                                                                                                          | <i>Tcerg1</i>                                            | 1,62663482 | 0,00029423 |
| Rna polymerase ii associated protein 3                                                                                                                                | <i>Rpap3</i>                                             | 1,62636692 | 0,0001406  |
| Magnesium-dependent phosphatase 1                                                                                                                                     | <i>Mdp1</i>                                              | 1,62613901 | 0,00015038 |
| Serine (or cysteine) peptidase inhibitor, clade i, member 1                                                                                                           | <i>Serpini1</i>                                          | 1,62541559 | 0,00046736 |
| Nadh dehydrogenase (ubiquinone) 1 beta subcomplex, 2                                                                                                                  | <i>Ndufb2</i>                                            | 1,62536883 | 0,00033966 |
| Cullin 2                                                                                                                                                              | <i>Cul2</i>                                              | 1,62530223 | 0,00135889 |
| Atp synthase, h+ transporting, mitochondrial f1 complex, alpha subunit 1                                                                                              | <i>Atp5a1</i>                                            | 1,62473087 | 0,00010345 |
| Gata binding protein 2                                                                                                                                                | <i>Gata2</i>                                             | 1,62445695 | 0,00050524 |
| Limb-bud and heart                                                                                                                                                    | <i>Lbh</i>                                               | 1,62418848 | 0,00207626 |
| Centromere protein m                                                                                                                                                  | <i>Cenpm</i>                                             | 1,62408148 | 0,00084751 |
| Transmembrane protein 159                                                                                                                                             | <i>Tmem159</i>                                           | 1,62354757 | 0,0002219  |
| Predicted gene 11554 /// predicted gene 11569 ///<br>keratin associated protein 4-13                                                                                  | <i>Gm11554</i> ///<br><i>gm11569</i> /// <i>krtp4-13</i> | 1,6230392  | 0,00242569 |
| Alpha-methylacyl-coa racemase                                                                                                                                         | <i>Amacr</i>                                             | 1,62241194 | 0,00010238 |
| Solute carrier family 27 (fatty acid transporter), member 4                                                                                                           | <i>Slc27a4</i>                                           | 1,6221216  | 7,64e-05   |
| St8 alpha-n-acetyl-neuraminide alpha-2,8-sialyltransferase 2                                                                                                          | <i>St8sia2</i>                                           | 1,62178889 | 0,00161173 |
| Heat-responsive protein 12                                                                                                                                            | <i>Hrsp12</i>                                            | 1,62172145 | 0,00112149 |
| Raftlin family member 2                                                                                                                                               | <i>Rftn2</i>                                             | 1,62134869 | 0,00021633 |
| Secretogranin v                                                                                                                                                       | <i>Scg5</i>                                              | 1,6199135  | 0,007122   |

|                                                                                                     |                                                  |            |            |
|-----------------------------------------------------------------------------------------------------|--------------------------------------------------|------------|------------|
| High mobility group at-hook 1 /// high mobility group at-hook i, related sequence 1                 | <i>Hmga1 /// hmga1-rs1</i>                       | 1,61947709 | 0,00629013 |
| Mitogen-activated protein kinase 3                                                                  | <i>Mapk3</i>                                     | 1,61943479 | 0,0001891  |
| Integral membrane protein 2c                                                                        | <i>Itm2c</i>                                     | 1,6188293  | 7,46e-05   |
| Hmg box domain containing 3                                                                         | <i>Hmgxb3</i>                                    | 1,6185888  | 0,00014726 |
| Riken cdna d930015e06 gene                                                                          | <i>D930015e06rik</i>                             | 1,61851749 | 8,54e-05   |
| Sema domain, immunoglobulin domain (ig), tm domain, and short cytoplasmic domain                    | <i>Sema4f</i>                                    | 1,61830314 | 0,00564487 |
| Hydroxysteroid dehydrogenase like 2                                                                 | <i>Hsdl2</i>                                     | 1,6179807  | 0,00330788 |
| Procollagen-proline, 2-oxoglutarate 4-dioxygenase (proline 4-hydroxylase), alpha 1 polypeptide      | <i>P4ha1</i>                                     | 1,61792591 | 0,00171855 |
| Cytochrome c oxidase assembly protein 19                                                            | <i>Cox19</i>                                     | 1,61725628 | 9,51e-05   |
| G protein-coupled receptor kinase 5                                                                 | <i>Grk5</i>                                      | 1,61706626 | 0,00168058 |
| Sh3 domain binding glutamic acid-rich protein-like 3                                                | <i>Sh3bgrl3</i>                                  | 1,61684913 | 7,10e-05   |
| Unc-13 homolog b (c. Elegans)                                                                       | <i>Unc13b</i>                                    | 1,61662503 | 0,00412602 |
| Aminopeptidase-like 1                                                                               | <i>Npepl1</i>                                    | 1,61537186 | 3,72e-05   |
| Ribokinase                                                                                          | <i>Rbks</i>                                      | 1,6148204  | 0,00105645 |
| Filamin, alpha                                                                                      | <i>Flna</i>                                      | 1,61395638 | 4,92e-05   |
| Tripartite motif-containing 21                                                                      | <i>Trim21</i>                                    | 1,61344784 | 0,00014467 |
| Cytohesin 2                                                                                         | <i>Cyth2</i>                                     | 1,61337759 | 5,88e-05   |
| Glucocorticoid induced transcript 1                                                                 | <i>Glcci1</i>                                    | 1,61334243 | 0,00273936 |
| Vacuolar protein sorting 33b (yeast)                                                                | <i>Vps33b</i>                                    | 1,61333805 | 0,00048739 |
| Argininosuccinate lyase                                                                             | <i>Asl</i>                                       | 1,6129553  | 0,00082205 |
| Deoxyguanosine kinase                                                                               | <i>Dguok</i>                                     | 1,61251306 | 0,00036476 |
| Tnf receptor-associated factor 5                                                                    | <i>Traf5</i>                                     | 1,61243912 | 5,85e-05   |
| Thimet oligopeptidase 1                                                                             | <i>Thop1</i>                                     | 1,61237343 | 0,0015323  |
| Vesicular, overexpressed in cancer, prosurvival protein 1                                           | <i>Vopp1</i>                                     | 1,61194813 | 0,00061828 |
| Heparan sulfate (glucosamine) 3-o-sulfotransferase 1                                                | <i>Hs3st1</i>                                    | 1,61179512 | 0,00067341 |
| Asparagine-linked glycosylation 13                                                                  | <i>Alg13</i>                                     | 1,61165277 | 0,00683466 |
| Clpb caseinolytic peptidase b                                                                       | <i>Clpb</i>                                      | 1,61068538 | 0,00121444 |
| Methyl-cpg binding domain protein 1                                                                 | <i>Mbd1</i>                                      | 1,61056872 | 7,03e-05   |
| Sprouty-related, evh1 domain containing 2                                                           | <i>Spred2</i>                                    | 1,61051132 | 3,03e-05   |
| Ubiquitin-conjugating enzyme e2e 2                                                                  | <i>Ube2e2</i>                                    | 1,60850288 | 0,00019925 |
| Crystallin, beta b1                                                                                 | <i>Crybb1</i>                                    | 1,60723163 | 0,00259916 |
| Discs, large homolog 4 (drosophila)                                                                 | <i>Dlg4</i>                                      | 1,60711041 | 0,0035767  |
| Intraflagellar transport 80                                                                         | <i>Ift80</i>                                     | 1,60548856 | 0,00012216 |
| Immature colon carcinoma transcript 1                                                               | <i>Ict1</i>                                      | 1,6051103  | 5,27e-05   |
| Polymerase i and transcript release factor                                                          | <i>Ptrf</i>                                      | 1,60464171 | 0,00432788 |
| Kinesin family member 23                                                                            | <i>Kif23</i>                                     | 1,60392585 | 0,00024657 |
| Homeobox b6                                                                                         | <i>Hoxb6</i>                                     | 1,6034517  | 0,00069177 |
| Required for meiotic nuclear division 5 homolog b (s. Cerevisiae)                                   | <i>Rmnd5b</i>                                    | 1,60306871 | 4,14e-05   |
| Selenoprotein k                                                                                     | <i>Selk</i>                                      | 1,60277522 | 6,25e-05   |
| Riken cdna 6430706d22 gene /// riken cdna a730008h23 gene /// holliday junction recognition protein | <i>6430706d22rik /// a730008h23rik /// hjurp</i> | 1,60198069 | 0,00017925 |



|                                                                                                 |                                       |            |            |
|-------------------------------------------------------------------------------------------------|---------------------------------------|------------|------------|
| Calcium channel, voltage-dependent, t type, alpha 1g subunit                                    | <i>Cacna1g</i>                        | 1,60140129 | 0,00384282 |
| Adenomatosis polyposis coli 2                                                                   | <i>Apc2</i>                           | 1,60109499 | 0,00391273 |
| Solute carrier family 22 (organic cation transporter), member 4                                 | <i>Slc22a4</i>                        | 1,60039089 | 0,00078884 |
| Predicted gene 12854 /// predicted gene 5068 /// s100 calcium binding protein a11 (calgizzarin) | <i>Gm12854 /// gm5068 /// s100a11</i> | 1,60037216 | 7,53e-05   |
| Ptk2 protein tyrosine kinase 2                                                                  | <i>Ptk2</i>                           | 1,60016383 | 0,00010075 |
| Zinc finger protein 672                                                                         | <i>Zfp672</i>                         | 1,59936461 | 0,0003289  |
| Solute carrier family 8 (sodium/lithium/calcium exchanger), member b1                           | <i>Slc8b1</i>                         | 1,59933478 | 0,00018039 |
| Ikbkb interacting protein                                                                       | <i>Ikbip</i>                          | 1,59908607 | 6,80e-05   |
| Retinoblastoma binding protein 8                                                                | <i>Rbbp8</i>                          | 1,59845565 | 0,00010745 |
| Rho-associated coiled-coil containing protein kinase 1                                          | <i>Rock1</i>                          | 1,5977236  | 0,00191277 |
| Mitochondrial ribosomal protein s18a                                                            | <i>Mrps18a</i>                        | 1,59764584 | 3,40e-05   |
| Ornithine decarboxylase antizyme 1 /// ornithine decarboxylase antizyme 1, pseudogene           | <i>Oaz1 /// oaz1-ps</i>               | 1,59730576 | 0,00016059 |
| Comm domain containing 1                                                                        | <i>Commd1</i>                         | 1,5968255  | 5,29e-05   |
| Sar1 gene homolog a (s. Cerevisiae)                                                             | <i>Sar1a</i>                          | 1,59670072 | 3,06e-05   |
| P450 (cytochrome) oxidoreductase                                                                | <i>Por</i>                            | 1,59623336 | 0,0004214  |
| Coiled-coil domain containing 64                                                                | <i>Ccdc64</i>                         | 1,59620704 | 0,00128457 |
| Solute carrier family 2, (facilitated glucose transporter), member 8                            | <i>Slc2a8</i>                         | 1,59529739 | 0,00058055 |
| Atp-binding cassette, sub-family a (abc1), member 7                                             | <i>Abca7</i>                          | 1,59501811 | 0,00073603 |
| Carboxypeptidase q                                                                              | <i>Cpq</i>                            | 1,59482203 | 3,84e-05   |
| Phosphoglucomutase 1                                                                            | <i>Pgm1</i>                           | 1,59463116 | 9,09e-05   |
| Dnaj (hsp40) homolog, subfamily b, member 2                                                     | <i>Dnajb2</i>                         | 1,59336263 | 0,00010523 |
| Period circadian clock 3                                                                        | <i>Per3</i>                           | 1,59332652 | 0,00105574 |
| Solute carrier family 38, member 10                                                             | <i>Slc38a10</i>                       | 1,5933065  | 0,00054256 |
| Period circadian clock 2                                                                        | <i>Per2</i>                           | 1,59319148 | 0,00048245 |
| La ribonucleoprotein domain family, member 1b                                                   | <i>Larp1b</i>                         | 1,59290513 | 0,00016225 |
| Acyl-coa thioesterase 13                                                                        | <i>Acot13</i>                         | 1,59265808 | 0,00038686 |
| Transmembrane bax inhibitor motif containing 1                                                  | <i>Tmbim1</i>                         | 1,59253474 | 0,00025556 |
| Neurofilament, heavy polypeptide                                                                | <i>Nefh</i>                           | 1,59226702 | 0,00198015 |
| Pdz domain containing 11                                                                        | <i>Pdzd11</i>                         | 1,59206043 | 0,00079761 |
| Budding uninhibited by benzimidazoles 1 homolog (s. Cerevisiae)                                 | <i>Bub1</i>                           | 1,5907517  | 0,00010884 |
| Asparaginase like 1                                                                             | <i>Asrgl1</i>                         | 1,59044736 | 0,00013223 |
| Progesterone and adiponectin receptor family member iv                                          | <i>Paqr4</i>                          | 1,5903949  | 0,00012522 |
| Spectrin beta, non-erythrocytic 1                                                               | <i>Sptbn1</i>                         | 1,59032626 | 0,00125854 |
| Coiled-coil domain containing 159                                                               | <i>Ccdc159</i>                        | 1,58932289 | 0,00064545 |
| Zinc finger protein 36                                                                          | <i>Zfp36</i>                          | 1,58870918 | 0,00074446 |
| Methyltransferase like 21a                                                                      | <i>Mettl21a</i>                       | 1,58867876 | 0,00817062 |
| Von hippel-lindau binding protein 1                                                             | <i>Vbp1</i>                           | 1,5883704  | 0,00144228 |
| Talin 1                                                                                         | <i>Tln1</i>                           | 1,58814811 | 0,00141052 |
| Translocase of inner mitochondrial membrane 22                                                  | <i>Timm22</i>                         | 1,58787468 | 8,94e-05   |
| Sap30 binding protein                                                                           | <i>Sap30bp</i>                        | 1,58743844 | 0,00018108 |

|                                                                                              |                             |            |            |
|----------------------------------------------------------------------------------------------|-----------------------------|------------|------------|
| Protein phosphatase 3, regulatory subunit b, alpha isoform (calcineurin b, type i)           | <i>Ppp3r1</i>               | 1,58711137 | 0,00488818 |
| Leiomodin 2 (cardiac)                                                                        | <i>Lmod2</i>                | 1,58697186 | 0,00062623 |
| Ubiquitin-conjugating enzyme e2 n-like /// ubiquitin-conjugating enzyme e2n                  | <i>Mcg1038069 /// ube2n</i> | 1,58677884 | 0,00968858 |
| Peptidase inhibitor 15                                                                       | <i>Pi15</i>                 | 1,58640462 | 0,00084185 |
| Expressed sequence ai413582                                                                  | <i>Ai413582</i>             | 1,58628592 | 0,0034131  |
| Protein kinase c, alpha                                                                      | <i>Prkca</i>                | 1,58620364 | 0,00013782 |
| Rna 2',3'-cyclic phosphate and 5'-oh ligase                                                  | <i>Rtcb</i>                 | 1,58603433 | 3,66e-05   |
| Ribosome production factor 2 homolog (s. Cerevisiae)                                         | <i>Rpf2</i>                 | 1,58579309 | 0,00021834 |
| Thymoma viral proto-oncogene 1                                                               | <i>Akt1</i>                 | 1,58547132 | 0,00157084 |
| Protein phosphatase 3, catalytic subunit, gamma isoform                                      | <i>Ppp3cc</i>               | 1,58543774 | 0,00110602 |
| Rab1, member ras oncogene family                                                             | <i>Rab1</i>                 | 1,58537323 | 0,00205602 |
| Tank-binding kinase 1                                                                        | <i>Tbk1</i>                 | 1,58533287 | 0,005699   |
| Spindle apparatus coiled-coil protein 1                                                      | <i>Spdl1</i>                | 1,58498143 | 0,0011137  |
| Glycolipid transfer protein                                                                  | <i>Gltp</i>                 | 1,58458004 | 0,00209294 |
| Predicted gene 3650 /// spastic paraplegia 11                                                | <i>Gm3650 /// spg11</i>     | 1,58451578 | 8,78e-05   |
| Pleckstrin homology domain-containing, family a (phosphoinositide binding specific) member 3 | <i>Plekha3</i>              | 1,58424935 | 0,00437    |
| Ubiquitin-like modifier activating enzyme 7                                                  | <i>Uba7</i>                 | 1,58419531 | 0,00061569 |
| Signal peptidase complex subunit 1 homolog (s. Cerevisiae)                                   | <i>Spcs1</i>                | 1,58406019 | 0,00928181 |
| Thymosin, beta 4, x chromosome                                                               | <i>Tmsb4x</i>               | 1,58388471 | 2,41e-05   |
| Thap domain containing, apoptosis associated protein 2                                       | <i>Thap2</i>                | 1,5835536  | 0,00212076 |
| Epidermal growth factor receptor pathway substrate 8                                         | <i>Eps8</i>                 | 1,58313401 | 0,00029767 |
| Protein kinase, camp dependent regulatory, type i beta                                       | <i>Prkar1b</i>              | 1,58292208 | 3,07e-05   |
| Cytoplasmic polyadenylation element binding protein 4                                        | <i>Cpeb4</i>                | 1,58153344 | 0,00320473 |
| Polymerase (dna-directed), epsilon 4 (p12 subunit)                                           | <i>Pole4</i>                | 1,58152381 | 0,00201088 |
| Teashirt zinc finger family member 1                                                         | <i>Tshz1</i>                | 1,58096369 | 6,37e-05   |
| Frizzled homolog 8 (drosophila)                                                              | <i>Fzd8</i>                 | 1,58083627 | 0,00035559 |
| Comm domain containing 6                                                                     | <i>Comm6</i>                | 1,58064695 | 0,00015343 |
| Phosphatidylglycerophosphate synthase 1                                                      | <i>Pgs1</i>                 | 1,58055957 | 7,46e-05   |
| Zinc finger protein 35                                                                       | <i>Zfp35</i>                | 1,5801319  | 0,00033051 |
| Map7 domain containing 1                                                                     | <i>Map7d1</i>               | 1,57997576 | 0,00021374 |
| Calsequestrin 2                                                                              | <i>Casq2</i>                | 1,57993126 | 0,00282601 |
| Bladder cancer associated protein homolog (human)                                            | <i>Blcap</i>                | 1,57978277 | 0,00025208 |
| Riken cdna 2310011j03 gene                                                                   | <i>2310011j03rik</i>        | 1,57970084 | 2,71e-05   |
| Polyadenylate-binding protein-interacting protein 2                                          | <i>Paip2</i>                | 1,57910105 | 0,00019748 |
| Pan2 polya specific ribonuclease subunit homolog (s. Cerevisiae)                             | <i>Pan2</i>                 | 1,57900864 | 0,00403361 |
| Eukaryotic translation initiation factor 4 gamma, 3                                          | <i>Eif4g3</i>               | 1,57793043 | 0,0002544  |
| Smad family member 4                                                                         | <i>Smad4</i>                | 1,57685149 | 0,00016449 |
| Lysosomal-associated protein transmembrane 4b                                                | <i>Laptm4b</i>              | 1,5763611  | 0,00010016 |
| Pih1 domain containing 1                                                                     | <i>Pih1d1</i>               | 1,57630193 | 6,34e-05   |
| Coiled-coil domain containing 53                                                             | <i>Ccdc53</i>               | 1,57598625 | 0,00066347 |

|                                                                                                                                     |                      |            |            |
|-------------------------------------------------------------------------------------------------------------------------------------|----------------------|------------|------------|
| Carbohydrate sulfotransferase 11                                                                                                    | <i>Chst11</i>        | 1,5754445  | 0,00587783 |
| Lysophospholipase 1                                                                                                                 | <i>Lypla1</i>        | 1,57489668 | 0,00358651 |
| Tripartite motif-containing 3                                                                                                       | <i>Trim3</i>         | 1,57464639 | 0,00498788 |
| Chemokine (c-x-c motif) ligand 12                                                                                                   | <i>Cxcl12</i>        | 1,57451847 | 0,0003551  |
| Oxidation resistance 1                                                                                                              | <i>Oxr1</i>          | 1,57444909 | 7,59e-05   |
| Anillin, actin binding protein                                                                                                      | <i>Anln</i>          | 1,57419118 | 0,00047136 |
| Citrate synthase                                                                                                                    | <i>Cs</i>            | 1,57366439 | 0,00012829 |
| Nsfl1 (p97) cofactor (p47)                                                                                                          | <i>Nsfl1c</i>        | 1,57336042 | 9,36e-05   |
| Methylenetetrahydrofolate dehydrogenase (nadp+ dependent), methenyltetrahydrofolate cyclohydrolase, formyltetrahydrofolate synthase | <i>Mthfd1</i>        | 1,57310313 | 6,11e-05   |
| Reticulon 4 interacting protein 1                                                                                                   | <i>Rtn4ip1</i>       | 1,57280512 | 0,00011001 |
| Eukaryotic translation initiation factor 1a, x-linked                                                                               | <i>Eif1ax</i>        | 1,57267481 | 0,00166522 |
| Pleckstrin homology domain containing, family b (evectins) member 2                                                                 | <i>Plekhb2</i>       | 1,57242804 | 0,0011149  |
| Polo-like kinase 2                                                                                                                  | <i>Plk2</i>          | 1,57230796 | 0,00012249 |
| Estrogen receptor-binding fragment-associated gene 9                                                                                | <i>Ebag9</i>         | 1,57175344 | 0,00085445 |
| Tetraspanin 31                                                                                                                      | <i>Tspan31</i>       | 1,57082055 | 4,88e-05   |
| Family with sequence similarity 53, member c                                                                                        | <i>Fam53c</i>        | 1,57072295 | 0,00010373 |
| Anaphase-promoting complex subunit 5                                                                                                | <i>Anapc5</i>        | 1,57070871 | 0,00958648 |
| Riken cdna 2210016121 gene                                                                                                          | <i>2210016121rik</i> | 1,56985745 | 0,00119584 |
| Riken cdna 8430419109 gene                                                                                                          | <i>8430419109rik</i> | 1,56967852 | 0,00025263 |
| Kinesin family member 5b                                                                                                            | <i>Kif5b</i>         | 1,5693171  | 0,00014956 |
| Isocitrate dehydrogenase 1 (nadp+), soluble                                                                                         | <i>Idh1</i>          | 1,56904533 | 0,00013113 |
| Glycerophosphocholine phosphodiesterase gde1 homolog (s. Cerevisiae)                                                                | <i>Gpcpd1</i>        | 1,56863433 | 0,00410003 |
| Tubulin, alpha 1a                                                                                                                   | <i>Tuba1a</i>        | 1,56822058 | 0,00019103 |
| Cd24a antigen                                                                                                                       | <i>Cd24a</i>         | 1,56786042 | 0,00813973 |
| Phospholipase b domain containing 2                                                                                                 | <i>Plbd2</i>         | 1,56775031 | 0,00051589 |
| Keratin 33b                                                                                                                         | <i>Krt33b</i>        | 1,56768788 | 0,00010542 |
| Uncharacterized loc269472                                                                                                           | <i>Loc269472</i>     | 1,56761804 | 0,00103246 |
| Atp-binding cassette, sub-family c (cftr/mrp), member 5                                                                             | <i>Abcc5</i>         | 1,56749341 | 0,00680331 |
| Tubulin, beta 4b class ivb                                                                                                          | <i>Tubb4b</i>        | 1,56696887 | 3,96e-05   |
| Riken cdna 1110051m20 gene                                                                                                          | <i>1110051m20rik</i> | 1,5666705  | 5,65e-05   |
| Asunder, spermatogenesis regulator                                                                                                  | <i>Asun</i>          | 1,56618599 | 0,00038705 |
| Fatty acid synthase                                                                                                                 | <i>Fasn</i>          | 1,56580001 | 0,00012121 |
| Protein kinase d2                                                                                                                   | <i>Prkd2</i>         | 1,56570984 | 0,00049529 |
| Activin a receptor, type 1                                                                                                          | <i>Acvr1</i>         | 1,56546727 | 0,00266862 |
| Run and sh3 domain containing 1                                                                                                     | <i>Rusc1</i>         | 1,5652001  | 0,00223319 |
| Cysteine-rich secretory protein 2                                                                                                   | <i>Crisp2</i>        | 1,56506394 | 0,00040199 |
| T cell receptor alpha variable 9d-3                                                                                                 | <i>Trav9d-3</i>      | 1,56484998 | 0,00552409 |
| Mitogen-activated protein kinase binding protein 1                                                                                  | <i>Mapkbp1</i>       | 1,56468569 | 0,00136922 |
| B cell cll/lymphoma 7b                                                                                                              | <i>Bcl7b</i>         | 1,56439128 | 0,00072085 |
| Iq motif containing gtpase activating protein 1                                                                                     | <i>Iqgap1</i>        | 1,5640744  | 0,00010796 |
| Fatty acid binding protein 4, adipocyte                                                                                             | <i>Fabp4</i>         | 1,56395091 | 0,00031819 |

|                                                                          |                |            |            |
|--------------------------------------------------------------------------|----------------|------------|------------|
| Polymerase (dna directed), alpha 1                                       | <i>Pola1</i>   | 1,56335213 | 0,00077803 |
| Mediator complex subunit 16                                              | <i>Med16</i>   | 1,56330913 | 0,00025661 |
| Lactation elevated 1                                                     | <i>Lace1</i>   | 1,56307759 | 0,00074224 |
| Ubiquitin specific peptidase 21                                          | <i>Usp21</i>   | 1,56285016 | 0,00013768 |
| 5' nucleotidase, ecto                                                    | <i>Nt5e</i>    | 1,56279836 | 0,00623383 |
| Potassium voltage-gated channel, shaker-related subfamily, beta member 3 | <i>Kcnab3</i>  | 1,56262119 | 0,00156134 |
| Small glutamine-rich tetratricopeptide repeat (tpr)-containing, alpha    | <i>Sgta</i>    | 1,56157058 | 0,00012974 |
| Mitogen-activated protein kinase kinase kinase 6                         | <i>Map3k6</i>  | 1,56108594 | 0,00040991 |
| Regulator of g-protein signaling 20                                      | <i>Rgs20</i>   | 1,56102372 | 0,00782543 |
| Hairy/enhancer-of-split related with yrpw motif 1                        | <i>Hey1</i>    | 1,55979032 | 0,00026961 |
| Ccr4-not transcription complex, subunit 2                                | <i>Cnot2</i>   | 1,5597896  | 0,00011072 |
| Aconitase 2, mitochondrial                                               | <i>Aco2</i>    | 1,55958936 | 6,90e-05   |
| Major histocompatibility complex, class i-related                        | <i>Mr1</i>     | 1,55914903 | 0,00850478 |
| S100 calcium binding protein a10 (calpactin)                             | <i>S100a10</i> | 1,55854471 | 3,45e-05   |
| Thioredoxin-related transmembrane protein 2                              | <i>Tmx2</i>    | 1,55831642 | 0,00025197 |
| Serrate rna effector molecule homolog (arabidopsis)                      | <i>Srrt</i>    | 1,55787799 | 0,00055739 |
| Ran gtpase activating protein 1                                          | <i>Rangap1</i> | 1,55786032 | 0,00010373 |
| Staphylococcal nuclease and tudor domain containing 1                    | <i>Snd1</i>    | 1,55695234 | 3,06e-05   |
| Microtubule-associated protein, rp/eb family, member 1                   | <i>Mapre1</i>  | 1,55667762 | 0,00282699 |
| Zinc finger protein 54                                                   | <i>Zfp54</i>   | 1,5565252  | 0,00744143 |
| Casein kinase 1, delta                                                   | <i>Csnk1d</i>  | 1,55633636 | 0,00018771 |
| Kinetochore-localized astrin/spag5 binding                               | <i>Knstrn</i>  | 1,55605217 | 0,00126379 |
| Cytoplasmic fmr1 interacting protein 1                                   | <i>Cyfi1</i>   | 1,55605207 | 0,00035001 |
| Sphingomyelin synthase 1                                                 | <i>Sgms1</i>   | 1,55528715 | 0,00018081 |
| Sec24 related gene family, member d (s. Cerevisiae)                      | <i>Sec24d</i>  | 1,55444024 | 0,00014264 |
| Interleukin 18                                                           | <i>Il18</i>    | 1,55377726 | 6,92e-05   |
| Au rna binding protein/enoyl-coenzyme a hydratase                        | <i>Auh</i>     | 1,5537009  | 0,0036176  |
| Farnesyltransferase, caax box, beta                                      | <i>Fntb</i>    | 1,55352232 | 0,00300131 |
| Myocyte enhancer factor 2c                                               | <i>Mef2c</i>   | 1,55313898 | 0,00087005 |
| Dehydrogenase/reductase (sdr family) member 1                            | <i>Dhrs1</i>   | 1,55310502 | 0,00151882 |
| Solute carrier family 41, member 2                                       | <i>Slc41a2</i> | 1,5529264  | 0,00063124 |
| Receptor accessory protein 3                                             | <i>Reep3</i>   | 1,55289192 | 0,00027913 |
| Dopa decarboxylase                                                       | <i>Ddc</i>     | 1,55268829 | 0,0015529  |
| Establishment of cohesion 1 homolog 1 (s. Cerevisiae)                    | <i>Esco1</i>   | 1,55253481 | 0,00110385 |
| Notch 4                                                                  | <i>Notch4</i>  | 1,55249207 | 0,0023289  |
| Oligosaccharyltransferase 4 homolog (s. Cerevisiae)                      | <i>Ost4</i>    | 1,5520209  | 0,00042281 |
| Microtubule associated serine/threonine kinase-like                      | <i>Mastl</i>   | 1,5518193  | 0,00105114 |
| Zinc finger protein 503                                                  | <i>Zfp503</i>  | 1,55176049 | 0,00717397 |
| Emi domain containing 1                                                  | <i>Emid1</i>   | 1,55169206 | 0,00320982 |
| Centromere protein a                                                     | <i>Cenpa</i>   | 1,55144407 | 0,00010332 |
| Mediator complex subunit 23                                              | <i>Med23</i>   | 1,55123534 | 0,00077436 |
| Solute carrier family 41, member 3                                       | <i>Slc41a3</i> | 1,55116785 | 0,00432468 |

|                                                                     |                      |            |            |
|---------------------------------------------------------------------|----------------------|------------|------------|
| Sec31 homolog a (s. Cerevisiae)                                     | <i>Sec31a</i>        | 1,55076653 | 0,00026345 |
| Translocator protein                                                | <i>Tspo</i>          | 1,55041138 | 0,00027973 |
| Tuftelin 1                                                          | <i>Tuft1</i>         | 1,55027151 | 0,0001304  |
| Calcineurin-like phosphoesterase domain containing 1                | <i>Cpped1</i>        | 1,55021927 | 0,00183786 |
| Filamin binding lim protein 1                                       | <i>Fblim1</i>        | 1,54951853 | 0,00187458 |
| Riken cdna 1810009n02 gene                                          | <i>1810009n02rik</i> | 1,54890862 | 0,0016163  |
| 1-acylglycerol-3-phosphate o-acyltransferase 3                      | <i>Agpat3</i>        | 1,54857303 | 0,00025042 |
| Serine/threonine kinase 10                                          | <i>Stk10</i>         | 1,54853596 | 0,00018505 |
| High mobility group box transcription factor 1                      | <i>Hbp1</i>          | 1,54850323 | 0,00012109 |
| Wd repeat domain 78                                                 | <i>Wdr78</i>         | 1,54847006 | 0,00066844 |
| Ubiquitin specific peptidase 14                                     | <i>Usp14</i>         | 1,54733496 | 8,81e-05   |
| Syntrophin, acidic 1                                                | <i>Snta1</i>         | 1,54668585 | 6,82e-05   |
| Dynactin 1                                                          | <i>Dctn1</i>         | 1,54521208 | 0,00054859 |
| Interferon, alpha-inducible protein 27 like 2a                      | <i>Ifi27l2a</i>      | 1,54501906 | 0,00025078 |
| Riken cdna 1810030o07 gene                                          | <i>1810030o07rik</i> | 1,54424592 | 0,00272215 |
| Methyltransferase like 23                                           | <i>Mettl23</i>       | 1,54421511 | 0,00114744 |
| N-deacetylase/n-sulfotransferase (heparan glucosaminy) 1            | <i>Ndst1</i>         | 1,54420899 | 4,22e-05   |
| Sorting and assembly machinery component 50 homolog (s. Cerevisiae) | <i>Samm50</i>        | 1,54401352 | 0,00010181 |
| St3 beta-galactoside alpha-2,3-sialyltransferase 1                  | <i>St3gal1</i>       | 1,5437939  | 0,00044193 |
| Transcription elongation factor a (sii)-like 8                      | <i>Tceal8</i>        | 1,54362024 | 0,00470045 |
| Protein kinase, amp-activated, gamma 1 non-catalytic subunit        | <i>Prkag1</i>        | 1,54327415 | 0,00055636 |
| Crystallin, alpha b                                                 | <i>Cryab</i>         | 1,54261016 | 0,00012009 |
| Tumor necrosis factor, alpha-induced protein 8                      | <i>Tnfaip8</i>       | 1,54255983 | 0,00078653 |
| G protein-coupled receptor 137b, pseudogene                         | <i>Gpr137b-ps</i>    | 1,54221371 | 0,00010009 |
| Dynactin 2                                                          | <i>Dctn2</i>         | 1,5414252  | 0,00010075 |
| Protein tyrosine phosphatase, receptor type, j                      | <i>Ptprj</i>         | 1,54098675 | 0,00758256 |
| Relt-like 1                                                         | <i>Rell1</i>         | 1,54035826 | 0,00254647 |
| Zinc finger, mym-type 3                                             | <i>Zmym3</i>         | 1,54002448 | 0,00026985 |
| Asparaginyl-trna synthetase                                         | <i>Nars</i>          | 1,53988223 | 0,00019055 |
| Transcriptional adaptor 1                                           | <i>Tada1</i>         | 1,53966355 | 0,00968752 |
| Pet112 homolog (s. Cerevisiae)                                      | <i>Pet112</i>        | 1,53960814 | 0,00214147 |
| Enoyl-coenzyme a, hydratase/3-hydroxyacyl coenzyme a dehydrogenase  | <i>Ehhadh</i>        | 1,53950981 | 0,00134423 |
| Seminal vesicle secretory protein 5                                 | <i>Svs5</i>          | 1,53929223 | 0,00016309 |
| Matrix metalloproteinase 19                                         | <i>Mmp19</i>         | 1,53887905 | 0,00055685 |
| Adipogenesis associated mth938 domain containing                    | <i>Aamdc</i>         | 1,53831902 | 0,00015539 |
| Nucleoporin 107                                                     | <i>Nup107</i>        | 1,5382107  | 5,15e-05   |
| Tubulin, gamma 1                                                    | <i>Tubg1</i>         | 1,53716024 | 0,00037508 |
| Aldo-keto reductase family 1, member c12                            | <i>Akr1c12</i>       | 1,53693765 | 0,00012685 |
| Guanosine monophosphate reductase 2                                 | <i>Gmpr2</i>         | 1,53688819 | 0,00058614 |
| Vimentin                                                            | <i>Vim</i>           | 1,53687258 | 4,04e-05   |
| Zinc finger, ccch-type with g patch domain                          | <i>Zgpat</i>         | 1,53640954 | 7,46e-05   |
| Septin 8                                                            | <i>Ix.08</i>         | 1,53593462 | 0,00025722 |

|                                                                                                                                                                       |                                                                         |            |            |
|-----------------------------------------------------------------------------------------------------------------------------------------------------------------------|-------------------------------------------------------------------------|------------|------------|
| Erythrocyte protein band 4.1-like 2                                                                                                                                   | <i>Epb4.1l2</i>                                                         | 1,53543005 | 0,00152358 |
| Mitogen-activated protein kinase kinase kinase 4                                                                                                                      | <i>Map3k4</i>                                                           | 1,53522202 | 0,00047808 |
| Thioredoxin reductase 2                                                                                                                                               | <i>Txnrd2</i>                                                           | 1,53440293 | 0,00233837 |
| Mitochondrial translational initiation factor 2                                                                                                                       | <i>Mtif2</i>                                                            | 1,53361475 | 0,00036723 |
| Bpi fold containing family b, member 1                                                                                                                                | <i>Bpifb1</i>                                                           | 1,5335655  | 0,00319857 |
| Sema domain, transmembrane domain (tm), and cytoplasmic domain, (semaphorin) 6a                                                                                       | <i>Sema6a</i>                                                           | 1,53354064 | 0,00825754 |
| Achalasia, adrenocortical insufficiency, alacrimia                                                                                                                    | <i>Aaas</i>                                                             | 1,53328373 | 0,0004915  |
| Riken cdna 1810011o10 gene                                                                                                                                            | <i>1810011o10rik</i>                                                    | 1,53320946 | 0,00013539 |
| Oxysterol binding protein-like 5                                                                                                                                      | <i>Osbpl5</i>                                                           | 1,53305745 | 0,00202598 |
| Cold inducible rna binding protein                                                                                                                                    | <i>Cirbp</i>                                                            | 1,53294972 | 0,00022668 |
| Riken cdna 6030458c11 gene                                                                                                                                            | <i>6030458c11rik</i>                                                    | 1,5325734  | 0,00020583 |
| Kinesin family member 4                                                                                                                                               | <i>Kif4</i>                                                             | 1,53248684 | 0,00016356 |
| Fucosidase, alpha-l- 1, tissue                                                                                                                                        | <i>Fuca1</i>                                                            | 1,5322795  | 0,00055276 |
| St6 (alpha-n-acetyl-neuraminyl-2,3-beta-galactosyl-1,3)-n-acetylgalactosaminide alpha-2,6-sialyltransferase 6                                                         | <i>St6galnac6</i>                                                       | 1,53187054 | 0,00169161 |
| Carbohydrate sulfotransferase 10                                                                                                                                      | <i>Chst10</i>                                                           | 1,53181236 | 6,88e-05   |
| Enhancer of polycomb homolog 1 (drosophila)                                                                                                                           | <i>Epc1</i>                                                             | 1,53077897 | 0,00054444 |
| Cell division cycle 34                                                                                                                                                | <i>Cdc34</i>                                                            | 1,5299129  | 0,00037774 |
| X-ray repair complementing defective repair in chinese hamster cells 4                                                                                                | <i>Xrcc4</i>                                                            | 1,52987171 | 0,00138635 |
| F-box protein 6                                                                                                                                                       | <i>Fbxo6</i>                                                            | 1,52969376 | 9,93e-05   |
| Arachidonate 5-lipoxygenase activating protein                                                                                                                        | <i>Alox5ap</i>                                                          | 1,52939909 | 0,0001788  |
| Hig1 domain family, member 1c /// methyltransferase like 7a1 /// methyltransferase like 7a2 /// mettl7a2-higd1c readthrough transcript /// methyltransferase like 7a3 | <i>Higd1c /// mettl7a1 /// mettl7a2 /// mettl7a2higd1c /// mettl7a3</i> | 1,52931253 | 0,00175396 |
| Dnaj (hsp40) homolog, subfamily c, member 24                                                                                                                          | <i>Dnajc24</i>                                                          | 1,52876404 | 0,00760759 |
| Late endosomal/lysosomal adaptor, mapk and mtor activator 2                                                                                                           | <i>Lamtor2</i>                                                          | 1,5287404  | 0,00015533 |
| Phosphorylase kinase alpha 1                                                                                                                                          | <i>Phka1</i>                                                            | 1,52832967 | 0,00570677 |
| Serine/arginine repetitive matrix 4                                                                                                                                   | <i>Srrm4</i>                                                            | 1,52831468 | 0,00234391 |
| Suppressor of var1, 3-like 1 (s. Cerevisiae)                                                                                                                          | <i>Supv3l1</i>                                                          | 1,52809612 | 7,74e-05   |
| Coiled-coil domain containing 6                                                                                                                                       | <i>Ccdc6</i>                                                            | 1,52807014 | 6,85e-05   |
| Scribbled homolog (drosophila)                                                                                                                                        | <i>Scrib</i>                                                            | 1,52805874 | 0,00282269 |
| Lim motif-containing protein kinase 2                                                                                                                                 | <i>Limk2</i>                                                            | 1,52736534 | 0,00047433 |
| Yeats domain containing 4                                                                                                                                             | <i>Yeats4</i>                                                           | 1,52701049 | 0,00010713 |
| Inosine triphosphatase (nucleoside triphosphate pyrophosphatase)                                                                                                      | <i>Itpa</i>                                                             | 1,52679964 | 0,00046648 |
| Spry domain containing 3                                                                                                                                              | <i>Spryd3</i>                                                           | 1,5261878  | 0,0004485  |
| Leukemia inhibitory factor                                                                                                                                            | <i>Lif</i>                                                              | 1,52576173 | 0,00484346 |
| 3-oxoacid coa transferase 1                                                                                                                                           | <i>Oxct1</i>                                                            | 1,52572109 | 0,00015929 |
| Mitochondrial ribosomal protein l33                                                                                                                                   | <i>Mrpl33</i>                                                           | 1,52528334 | 0,00103175 |
| Coiled coil domain containing 88a                                                                                                                                     | <i>Ccdc88a</i>                                                          | 1,52486895 | 0,0001909  |
| Riken cdna 2810417h13 gene                                                                                                                                            | <i>2810417h13rik</i>                                                    | 1,52451174 | 5,78e-05   |
| C2 calcium-dependent domain containing 2-like                                                                                                                         | <i>C2cd2l</i>                                                           | 1,52442505 | 0,00607751 |
| Sec22 vesicle trafficking protein homolog b (s. Cerevisiae)                                                                                                           | <i>Sec22b</i>                                                           | 1,52429124 | 0,00012935 |

|                                                               |                           |            |            |
|---------------------------------------------------------------|---------------------------|------------|------------|
| Tbc1 domain family, member 15                                 | <i>Tbc1d15</i>            | 1,5240709  | 0,00411504 |
| Nadh dehydrogenase (ubiquinone) 1 beta subcomplex, 9          | <i>Ndufb9</i>             | 1,52338691 | 0,00036145 |
| Eukaryotic translation initiation factor 4e binding protein 2 | <i>Eif4ebp2</i>           | 1,52313789 | 0,00026985 |
| Dual specificity phosphatase 14                               | <i>Dusp14</i>             | 1,52279793 | 0,00038701 |
| Prion protein                                                 | <i>Prnp</i>               | 1,52275889 | 0,00016059 |
| Musculoskeletal, embryonic nuclear protein 1                  | <i>Mustn1</i>             | 1,52231085 | 0,00224789 |
| Autophagy related 12                                          | <i>Atg12</i>              | 1,52225226 | 0,00027118 |
| Prolyl endopeptidase-like                                     | <i>Prepl</i>              | 1,52174369 | 0,00020171 |
| Predicted gene 10193 /// zinc finger protein 706              | <i>Gm10193 /// zfp706</i> | 1,52157079 | 0,00085972 |
| Hect domain and rld 4                                         | <i>Herc4</i>              | 1,52108527 | 0,00103166 |
| Maternal embryonic leucine zipper kinase                      | <i>Melk</i>               | 1,52065765 | 0,00300883 |
| Protein regulator of cytokinesis 1                            | <i>Prc1</i>               | 1,52058377 | 8,89e-05   |
| Transmembrane and coiled-coil domains 2                       | <i>Tmcc2</i>              | 1,52018281 | 0,00127535 |
| Myeloid cell leukemia sequence 1                              | <i>Mcl1</i>               | 1,52008634 | 0,00268677 |
| Plastin 3 (t-isoform)                                         | <i>Pls3</i>               | 1,52005762 | 0,00030766 |
| Dehydrololichyl diphosphate synthase                          | <i>Dhdds</i>              | 1,51979408 | 0,00036358 |
| Riken cdna 4932438a13 gene                                    | <i>4932438a13rik</i>      | 1,5191771  | 0,0009318  |
| Homeobox c6                                                   | <i>Hoxc6</i>              | 1,51884762 | 0,00914449 |
| Fk506 binding protein 5                                       | <i>Fkbp5</i>              | 1,5186897  | 0,00010761 |
| Leucine-zipper-like transcriptional regulator, 1              | <i>Lztr1</i>              | 1,51853963 | 0,00040615 |
| Glypican 1                                                    | <i>Gpc1</i>               | 1,51793289 | 6,81e-05   |
| Ubiquitin c                                                   | <i>Ubc</i>                | 1,51768685 | 0,00053094 |
| Transcription factor 19                                       | <i>Tcf19</i>              | 1,51767502 | 4,93e-05   |
| Rotatin                                                       | <i>Rttm</i>               | 1,51740047 | 0,00024668 |
| Fermitin family homolog 2 (drosophila)                        | <i>Fermt2</i>             | 1,51710355 | 0,00096276 |
| Prominin 2                                                    | <i>Prom2</i>              | 1,51531761 | 0,00104512 |
| Start domain containing 10                                    | <i>Stard10</i>            | 1,51507493 | 0,00173462 |
| Family with sequence similarity 73, member b                  | <i>Fam73b</i>             | 1,51456059 | 0,00016653 |
| Predicted gene 12538 /// orm1-like 3 (s. Cerevisiae)          | <i>Gm12538 /// ormdl3</i> | 1,51427311 | 0,00017518 |
| Cyclin d-type binding-protein 1                               | <i>Ccndbp1</i>            | 1,51384614 | 0,00029599 |
| Choroideremia                                                 | <i>Chm</i>                | 1,513529   | 0,00020044 |
| Ornithine decarboxylase antizyme 2                            | <i>Oaz2</i>               | 1,51341505 | 0,00022801 |
| Leucine-rich repeats and wd repeat domain containing 1        | <i>Lrwd1</i>              | 1,51319892 | 0,00021822 |
| Dehydrogenase/reductase (sdr family) member 4                 | <i>Dhrs4</i>              | 1,51296311 | 0,00053599 |
| Sub1 homolog (s. Cerevisiae)                                  | <i>Sub1</i>               | 1,5127786  | 4,90e-05   |
| Protein o-fucosyltransferase 2                                | <i>Pofut2</i>             | 1,51266367 | 0,00192371 |
| Carbonic anhydrase 13                                         | <i>Car13</i>              | 1,51209659 | 0,00097253 |
| Tpx2, microtubule-associated protein homolog (xenopus laevis) | <i>Tpx2</i>               | 1,51087509 | 9,72e-05   |
| Polymerase (rna) ii (dna directed) polypeptide e              | <i>Polr2e</i>             | 1,51049565 | 8,36e-05   |
| Protocadherin beta 14                                         | <i>Pcdhb14</i>            | 1,51035233 | 0,00310511 |
| Tumor susceptibility gene 101                                 | <i>Tsg101</i>             | 1,51003597 | 0,00027481 |
| Calpain 2                                                     | <i>Capn2</i>              | 1,50986148 | 0,00012655 |

|                                                                                                                                 |                          |            |            |
|---------------------------------------------------------------------------------------------------------------------------------|--------------------------|------------|------------|
| Riken cdna d030029j20 gene                                                                                                      | <i>D030029j20rik</i>     | 1,50952225 | 0,00185247 |
| Trio and f-actin binding protein                                                                                                | <i>Triobp</i>            | 1,5094524  | 0,00367553 |
| Phosphoseryl-trna kinase                                                                                                        | <i>Pstk</i>              | 1,50939284 | 0,00023819 |
| Potassium voltage gated channel, shab-related subfamily, member 1 /// protein kinase c and casein kinase substrate in neurons 2 | <i>Kcnb1 /// pacsin2</i> | 1,50937754 | 0,00011773 |
| Endoplasmic reticulum lectin 1                                                                                                  | <i>Erlec1</i>            | 1,50856006 | 0,00190256 |
| Sema domain, immunoglobulin domain (ig), transmembrane domain (tm) and short cytoplasmic domain, (semaphorin) 4b                | <i>Sema4b</i>            | 1,50765196 | 0,00159612 |
| Cofilin 2, muscle                                                                                                               | <i>Cfl2</i>              | 1,50756087 | 0,00124117 |
| S-adenosylmethionine decarboxylase 1                                                                                            | <i>Amd1</i>              | 1,50726707 | 0,00014051 |
| Calponin 3, acidic                                                                                                              | <i>Cnn3</i>              | 1,50716596 | 0,00063058 |
| Amplified in osteosarcoma                                                                                                       | <i>Os9</i>               | 1,50701242 | 0,00300903 |
| Retinol saturase (all trans retinol 13,14 reductase)                                                                            | <i>Retsat</i>            | 1,50674148 | 0,0002769  |
| Non-smc condensin i complex, subunit h                                                                                          | <i>Ncaph</i>             | 1,5066382  | 0,0002328  |
| Cdna sequence bc018242                                                                                                          | <i>Bc018242</i>          | 1,50641271 | 0,00536898 |
| Caspase 8                                                                                                                       | <i>Casp8</i>             | 1,50567632 | 0,00801458 |
| Oligophrenin 1                                                                                                                  | <i>Ophn1</i>             | 1,50547745 | 0,00050786 |
| Zinc and ring finger 2                                                                                                          | <i>Znrf2</i>             | 1,50504258 | 0,00020381 |
| Ras-related c3 botulinum substrate 3                                                                                            | <i>Rac3</i>              | 1,50503522 | 0,00117374 |
| Riken cdna 0610009o20 gene                                                                                                      | <i>0610009o20rik</i>     | 1,50497856 | 0,00165115 |
| Traf3 interacting protein 2                                                                                                     | <i>Traf3ip2</i>          | 1,50472421 | 0,00039041 |
| Rrs1 ribosome biogenesis regulator homolog pseudogene                                                                           | <i>4632415l05rik</i>     | 1,504552   | 0,00569364 |
| Dead (asp-glu-ala-asp) box polypeptide 50                                                                                       | <i>Ddx50</i>             | 1,50434621 | 8,23e-05   |
| Inhibin beta-a                                                                                                                  | <i>Inhba</i>             | 1,50367737 | 0,00425161 |
| Jumonji, at rich interactive domain 2                                                                                           | <i>Jarid2</i>            | 1,50342958 | 0,00103622 |
| Protein tyrosine phosphatase, non-receptor type 2                                                                               | <i>Ptpn2</i>             | 1,50312563 | 0,00513645 |
| Adaptor protein, phosphotyrosine interaction, ph domain and leucine zipper containing 2                                         | <i>Appl2</i>             | 1,50291377 | 0,00050658 |
| Udp-n-acetyl-alpha-d-galactosamine:polypeptide n-acetylglactosaminyltransferase 1                                               | <i>Galnt1</i>            | 1,50269176 | 0,0001689  |
| L antigen family, member 3                                                                                                      | <i>Lage3</i>             | 1,501224   | 0,00011794 |
| Plectin                                                                                                                         | <i>Plec</i>              | 1,50108166 | 0,00306773 |
| Stanniocalcin 2                                                                                                                 | <i>Stc2</i>              | 1,50090234 | 0,00102835 |
| High mobility group box 3                                                                                                       | <i>Hmgb3</i>             | 1,50062532 | 0,00227913 |
| Nudix (nucleoside diphosphate linked moiety x)-type motif 4                                                                     | <i>Nudt4</i>             | 1,50055727 | 8,81e-05   |
| Poly (adp-ribose) polymerase family, member 4                                                                                   | <i>Parp4</i>             | 1,50048281 | 0,00281973 |
| Dead (asp-glu-ala-asp) box polypeptide 21                                                                                       | <i>Ddx21</i>             | 1,50037423 | 0,00020049 |
| Mitochondrial rna methyltransferase 1 homolog (s. Cerevisiae)                                                                   | <i>Mrm1</i>              | 1,49982765 | 0,00027249 |
| Immunoglobulin (cd79a) binding protein 1                                                                                        | <i>Igbp1</i>             | 1,49970492 | 0,00028494 |
| N-acetylglucosamine kinase                                                                                                      | <i>Nagk</i>              | 1,49950325 | 0,00063767 |
| Hemochromatosis                                                                                                                 | <i>Hfe</i>               | 1,49892564 | 0,00038865 |
| Ring finger protein 41                                                                                                          | <i>Rnf41</i>             | 1,49858327 | 0,00095031 |
| Tripartite motif-containing 34a                                                                                                 | <i>Trim34a</i>           | 1,49697612 | 0,00754305 |



|                                                                                                                                                                                       |                                                                                                                                 |            |            |
|---------------------------------------------------------------------------------------------------------------------------------------------------------------------------------------|---------------------------------------------------------------------------------------------------------------------------------|------------|------------|
| Surfeit gene 2                                                                                                                                                                        | <i>Surf2</i>                                                                                                                    | 1,49688186 | 0,00047433 |
| Zinc finger prtoein 943                                                                                                                                                               | <i>Zfp943</i>                                                                                                                   | 1,49664162 | 0,00078296 |
| Calpain 5                                                                                                                                                                             | <i>Capn5</i>                                                                                                                    | 1,49660224 | 0,00146017 |
| Endonuclease g                                                                                                                                                                        | <i>Endog</i>                                                                                                                    | 1,49592542 | 0,00472722 |
| Tumor necrosis factor, alpha-induced protein 1 (endothelial)                                                                                                                          | <i>Tnfaip1</i>                                                                                                                  | 1,49510635 | 0,00039512 |
| Ankyrin repeat and socs box-containing 3                                                                                                                                              | <i>Asb3</i>                                                                                                                     | 1,49509907 | 0,00120682 |
| Furry homolog-like (drosophila)                                                                                                                                                       | <i>Fryl</i>                                                                                                                     | 1,49501023 | 0,00014144 |
| Component of sp100-rs /// predicted pseudogene 15433<br>/// predicted gene 2666 /// predicted pseudogene 7609<br>/// uncharacterized loc100041903 /// uncharacterized<br>loc100503923 | <i>Csprs</i> /// <i>gm15433</i><br>/// <i>gm2666</i> ///<br><i>gm7609</i> ///<br><i>loc100041903</i> ///<br><i>loc100503923</i> | 1,4949191  | 0,00565691 |
| Retinoblastoma 1                                                                                                                                                                      | <i>Rb1</i>                                                                                                                      | 1,49489658 | 0,00215585 |
| Centrosomal protein 350                                                                                                                                                               | <i>Cep350</i>                                                                                                                   | 1,49463774 | 0,00151792 |
| Zinc finger protein 39                                                                                                                                                                | <i>Zfp39</i>                                                                                                                    | 1,49430814 | 0,00089558 |
| Gtp binding protein 1                                                                                                                                                                 | <i>Gtpbp1</i>                                                                                                                   | 1,49407788 | 0,00029081 |
| Vcp-interacting membrane protein                                                                                                                                                      | <i>Vimp</i>                                                                                                                     | 1,49384314 | 0,0008094  |
| Low density lipoprotein receptor                                                                                                                                                      | <i>Ldlr</i>                                                                                                                     | 1,49378456 | 0,0002073  |
| Tbc1 domain family, member 22a                                                                                                                                                        | <i>Tbc1d22a</i>                                                                                                                 | 1,49291342 | 0,00015963 |
| Pleckstrin homology domain containing, family g (with rhogef domain) member 2                                                                                                         | <i>Plekhg2</i>                                                                                                                  | 1,49276952 | 0,00718818 |
| Rho gtpase activating protein 9                                                                                                                                                       | <i>Arhgap9</i>                                                                                                                  | 1,49271914 | 0,00026923 |
| Insulin-like growth factor 2, opposite strand                                                                                                                                         | <i>Igf2os</i>                                                                                                                   | 1,49182677 | 0,00201492 |
| Aldolase a, fructose-bisphosphate                                                                                                                                                     | <i>Aldoa</i>                                                                                                                    | 1,49177145 | 0,0038582  |
| Cyclin-dependent kinase 5                                                                                                                                                             | <i>Cdk5</i>                                                                                                                     | 1,49094566 | 0,00045561 |
| Kdm3b lysine (k)-specific demethylase 3b                                                                                                                                              | <i>Kdm3b</i>                                                                                                                    | 1,49092297 | 0,00018659 |
| Heat shock protein 2                                                                                                                                                                  | <i>Hspa2</i>                                                                                                                    | 1,4903547  | 0,00250243 |
| Capicua homolog (drosophila)                                                                                                                                                          | <i>Cic</i>                                                                                                                      | 1,49034317 | 0,00215012 |
| Mitogen-activated protein kinase 8 interacting protein 1                                                                                                                              | <i>Mapk8ip1</i>                                                                                                                 | 1,49007388 | 0,00899634 |
| Tao kinase 3                                                                                                                                                                          | <i>Taok3</i>                                                                                                                    | 1,48994266 | 0,00817875 |
| Signal transducer and activator of transcription 6                                                                                                                                    | <i>Stat6</i>                                                                                                                    | 1,48868095 | 0,00043109 |
| Rfad1, flavin adenine dinucleotide synthetase, homolog (yeast) /// lens epithelial protein                                                                                            | <i>Flad1</i> /// <i>lenep</i>                                                                                                   | 1,48866441 | 0,00315415 |
| Plakophilin 4                                                                                                                                                                         | <i>Pkp4</i>                                                                                                                     | 1,48827666 | 0,00022376 |
| Jnk1/mapk8-associated membrane protein                                                                                                                                                | <i>Ikamp</i>                                                                                                                    | 1,48820849 | 0,00068881 |
| Sam domain, sh3 domain and nuclear localization signals, 1                                                                                                                            | <i>Samsn1</i>                                                                                                                   | 1,48801928 | 0,00117374 |
| Zinc finger protein 207                                                                                                                                                               | <i>Zfp207</i>                                                                                                                   | 1,48765591 | 0,00229536 |
| Coiled-coil domain containing 91                                                                                                                                                      | <i>Ccdc91</i>                                                                                                                   | 1,48719093 | 0,00102676 |
| Inversin                                                                                                                                                                              | <i>Invs</i>                                                                                                                     | 1,48704953 | 0,00372573 |
| Aldehyde dehydrogenase 4 family, member a1                                                                                                                                            | <i>Aldh4a1</i>                                                                                                                  | 1,48688702 | 0,00755877 |
| Nadh dehydrogenase (ubiquinone) 1 alpha subcomplex, 6 (b14)                                                                                                                           | <i>Ndufa6</i>                                                                                                                   | 1,48685057 | 0,00028526 |
| Discoidin domain receptor family, member 2                                                                                                                                            | <i>Ddr2</i>                                                                                                                     | 1,48673088 | 0,00716128 |
| Major vault protein                                                                                                                                                                   | <i>Mvp</i>                                                                                                                      | 1,48613027 | 0,00593625 |
| Regulatory factor x, 2 (influences hla class ii expression)                                                                                                                           | <i>Rfx2</i>                                                                                                                     | 1,48610232 | 8,98e-05   |

|                                                                    |                      |            |            |
|--------------------------------------------------------------------|----------------------|------------|------------|
| Myeloid leukemia factor 1                                          | <i>Mlf1</i>          | 1,4857753  | 0,00129553 |
| Zinc finger, dhhc domain containing 3                              | <i>Zdhhc3</i>        | 1,48565448 | 0,00016216 |
| Peroxiredoxin 4                                                    | <i>Prdx4</i>         | 1,48562841 | 8,80e-05   |
| Chromobox 5                                                        | <i>Cbx5</i>          | 1,48558556 | 0,00020624 |
| Eh domain binding protein 1                                        | <i>Ehbp1</i>         | 1,48537903 | 0,00103975 |
| Methylmalonyl coa epimerase                                        | <i>Mcee</i>          | 1,48515172 | 0,00193202 |
| Elongation protein 4 homolog (s. Cerevisiae)                       | <i>Elp4</i>          | 1,48471679 | 0,00357193 |
| Interleukin 15                                                     | <i>Il15</i>          | 1,48457447 | 0,00038701 |
| Small integral membrane protein 14                                 | <i>Smim14</i>        | 1,48443358 | 0,00011127 |
| Unc-45 homolog a (c. Elegans)                                      | <i>Unc45a</i>        | 1,48422612 | 0,00489058 |
| Predicted gene, 20559                                              | <i>Gm20559</i>       | 1,48384506 | 0,00035809 |
| Nol1/nop2/sun domain family member 6                               | <i>Nsun6</i>         | 1,48372    | 0,00207626 |
| Thioredoxin-like 4a                                                | <i>Txnl4a</i>        | 1,48333232 | 0,00036257 |
| Sry (sex determining region y)-box 13                              | <i>Sox13</i>         | 1,48327257 | 0,00489897 |
| Gram domain containing 3                                           | <i>Gramd3</i>        | 1,48298741 | 0,00044871 |
| Solute carrier family 19 (thiamine transporter), member 2          | <i>Slc19a2</i>       | 1,48297196 | 0,00042047 |
| Rap2c, member of ras oncogene family                               | <i>Rap2c</i>         | 1,48250155 | 0,00256787 |
| Mannosidase, alpha, class 2c, member 1                             | <i>Man2c1</i>        | 1,48189657 | 0,00137762 |
| Guanine nucleotide binding protein (g protein), alpha inhibiting 2 | <i>Gnai2</i>         | 1,48188006 | 0,00027249 |
| Hexamethylene bis-acetamide inducible 1                            | <i>Hexim1</i>        | 1,4816773  | 0,00028726 |
| Gpi anchor attachment protein 1                                    | <i>Gpaa1</i>         | 1,48129856 | 0,00312981 |
| Protein phosphatase 1, regulatory (inhibitor) subunit 7            | <i>Ppp1r7</i>        | 1,4811363  | 0,0001788  |
| N-glycanase 1                                                      | <i>Ngly1</i>         | 1,48103238 | 0,00179724 |
| Ww domain containing e3 ubiquitin protein ligase 2                 | <i>Wwp2</i>          | 1,48017554 | 0,00807197 |
| Nipsnap homolog 3b (c. Elegans)                                    | <i>Nipsnap3b</i>     | 1,47986766 | 0,00243507 |
| Mitochondrial ribosomal protein l4                                 | <i>Mrpl4</i>         | 1,47968117 | 0,0005427  |
| Cell division cycle 42                                             | <i>Cdc42</i>         | 1,47953076 | 0,00316303 |
| Lamin a                                                            | <i>Lmna</i>          | 1,47943191 | 0,00041623 |
| Myosin xix                                                         | <i>Myo19</i>         | 1,47868775 | 0,0009005  |
| Nucleoporin 155                                                    | <i>Nup155</i>        | 1,47842323 | 0,00397872 |
| A disintegrin and metallopeptidase domain 22                       | <i>Adam22</i>        | 1,4780841  | 0,00483075 |
| Hairy and enhancer of split 6                                      | <i>Hes6</i>          | 1,47804364 | 0,00206152 |
| Histone deacetylase 9                                              | <i>Hdac9</i>         | 1,47788875 | 0,00554966 |
| Epithelial membrane protein 1                                      | <i>Emp1</i>          | 1,47756667 | 0,00093585 |
| Early endosome antigen 1                                           | <i>Eea1</i>          | 1,47742883 | 0,0004454  |
| Comm domain containing 5                                           | <i>Comm5</i>         | 1,47700374 | 0,00369785 |
| Isocitrate dehydrogenase 3 (nad+) alpha                            | <i>Idh3a</i>         | 1,47691189 | 0,00176213 |
| Amyloid beta (a4) precursor protein-binding, family a, member 3    | <i>Apba3</i>         | 1,4764386  | 0,00331408 |
| Riken cdna 3110057o12 gene                                         | <i>3110057o12rik</i> | 1,47633045 | 0,00234929 |
| Inositol polyphosphate-5-phosphatase e                             | <i>Inpp5e</i>        | 1,47583011 | 0,0014144  |
| Unc-119 homolog b (c. Elegans)                                     | <i>Unc119b</i>       | 1,4757359  | 0,00025259 |
| Slit-robo rho gtpase activating protein 3                          | <i>Srgap3</i>        | 1,47509291 | 0,00019779 |
| Phosphoprotein enriched in astrocytes 15a                          | <i>Pea15a</i>        | 1,47352737 | 9,82e-05   |

|                                                                                               |                                                        |            |            |
|-----------------------------------------------------------------------------------------------|--------------------------------------------------------|------------|------------|
| Beta-carotene oxygenase 2                                                                     | <i>Bco2</i>                                            | 1,4733778  | 0,00141302 |
| Elastin microfibril interfacer 1                                                              | <i>Emilin1</i>                                         | 1,47291897 | 0,00861529 |
| Calmodulin 1 /// calmodulin 2 /// calmodulin 3                                                | <i>Calm1</i> /// <i>calm2</i> /// <i>calm3</i>         | 1,47195344 | 0,0013555  |
| Cysteine rich transmembrane bmp regulator 1 (chordin like)                                    | <i>Crim1</i>                                           | 1,47152102 | 0,00215774 |
| Solute carrier family 6 (neurotransmitter transporter), member 17                             | <i>Slc6a17</i>                                         | 1,47116461 | 0,00327286 |
| Von willebrand factor a domain containing 5a                                                  | <i>Vwa5a</i>                                           | 1,47111564 | 0,00515749 |
| Golgi autoantigen, golgin subfamily a, 3                                                      | <i>Golga3</i>                                          | 1,47098923 | 0,00058519 |
| Golgi autoantigen, golgin subfamily a, 2                                                      | <i>Golga2</i>                                          | 1,47070856 | 0,0006033  |
| Polyglutamine binding protein 1                                                               | <i>Pqbp1</i>                                           | 1,47063538 | 0,00015629 |
| Secretory carrier membrane protein 3                                                          | <i>Scamp3</i>                                          | 1,47049368 | 8,86e-05   |
| Map/microtubule affinity-regulating kinase 4                                                  | <i>Mark4</i>                                           | 1,47037907 | 0,00874848 |
| Antizyme inhibitor 1                                                                          | <i>Azin1</i>                                           | 1,46998069 | 0,00916981 |
| Cap-gly domain containing linker protein family, member 4                                     | <i>Clip4</i>                                           | 1,46961116 | 0,00056579 |
| Snap-associated protein                                                                       | <i>Snapiin</i>                                         | 1,46845694 | 0,00017938 |
| Gamma-glutamyl cyclotransferase                                                               | <i>Ggct</i>                                            | 1,46842303 | 0,00160661 |
| Slit-robo rho gtpase activating protein 2                                                     | <i>Srgap2</i>                                          | 1,467885   | 0,0003649  |
| Tetraspanin 6                                                                                 | <i>Tspan6</i>                                          | 1,4677141  | 0,00540521 |
| Thymus, brain and testes associated                                                           | <i>Tbata</i>                                           | 1,46741768 | 0,00122456 |
| Ankyrin repeat domain 46                                                                      | <i>Ankrd46</i>                                         | 1,46708564 | 0,0003646  |
| Mitochondrial ribosomal protein l13                                                           | <i>Mrpl13</i>                                          | 1,4667048  | 0,00010839 |
| St3 beta-galactoside alpha-2,3-sialyltransferase 5                                            | <i>St3gal5</i>                                         | 1,46656387 | 0,00231111 |
| Riken cdna 4933413g19 gene /// forkhead box m1 /// phosphatidylethanolamine binding protein 1 | <i>4933413g19rik</i> /// <i>foxm1</i> /// <i>pebp1</i> | 1,46649853 | 0,00632241 |
| Cysteine and glycine-rich protein 1                                                           | <i>Csrp1</i>                                           | 1,46638523 | 0,00902664 |
| Adp-ribosylation factor-like 1                                                                | <i>Arl1</i>                                            | 1,46616856 | 0,00022249 |
| Endonuclease/exonuclease/phosphatase family domain containing 1                               | <i>Eepd1</i>                                           | 1,46497071 | 0,00277875 |
| Arginyl aminopeptidase (aminopeptidase b)                                                     | <i>Rnpep</i>                                           | 1,46466251 | 0,00321232 |
| Rap2b, member of ras oncogene family                                                          | <i>Rap2b</i>                                           | 1,46454322 | 0,00276494 |
| Cd274 antigen                                                                                 | <i>Cd274</i>                                           | 1,46453378 | 0,00216391 |
| Cadherin 4                                                                                    | <i>Cdh4</i>                                            | 1,46357778 | 0,00033453 |
| Adp-ribosylation factor 3                                                                     | <i>Arf3</i>                                            | 1,46319091 | 0,00857204 |
| Riken cdna 0610010k14 gene /// ribonuclease, rnase k                                          | <i>0610010k14rik</i> /// <i>rnasek</i>                 | 1,46316667 | 0,00209576 |
| Zinc finger protein 239                                                                       | <i>Zfp239</i>                                          | 1,46302801 | 0,00034852 |
| Breakpoint cluster region                                                                     | <i>Bcr</i>                                             | 1,46265206 | 0,00207658 |
| Rab4b, member ras oncogene family                                                             | <i>Rab4b</i>                                           | 1,46262379 | 0,00160754 |
| Adducin 1 (alpha)                                                                             | <i>Add1</i>                                            | 1,46248048 | 0,00332087 |
| Mitochondrial ribosomal protein s34 /// nme/nm23                                              | <i>Mrps34</i> /// <i>nme3</i>                          | 1,46225466 | 0,00194947 |
| nucleoside diphosphate kinase 3                                                               |                                                        |            |            |
| Transmembrane and coiled-coil domains 1                                                       | <i>Tmco1</i>                                           | 1,46176892 | 0,00932947 |
| Inositol polyphosphate-5-phosphatase a                                                        | <i>Inpp5a</i>                                          | 1,46168575 | 0,00103214 |
| Phosphatidylinositol glycan anchor biosynthesis, class k                                      | <i>Pigk</i>                                            | 1,46108827 | 0,00826967 |

|                                                                      |                |            |            |
|----------------------------------------------------------------------|----------------|------------|------------|
| Adducin 2 (beta)                                                     | <i>Add2</i>    | 1,46097709 | 0,00334606 |
| Phosducin-like 3                                                     | <i>Pdcl3</i>   | 1,46094355 | 0,00684954 |
| 5'-3' exoribonuclease 2                                              | <i>Xrn2</i>    | 1,46083013 | 0,00130841 |
| Transcription factor 3                                               | <i>Tcf3</i>    | 1,46079715 | 0,00208449 |
| Sorting nexin 29                                                     | <i>Snx29</i>   | 1,46026932 | 0,00041015 |
| Nadh dehydrogenase (ubiquinone) 1 beta subcomplex, 10                | <i>Ndufb10</i> | 1,45916375 | 0,00114075 |
| Hermansky-pudlak syndrome 3 homolog (human)                          | <i>Hps3</i>    | 1,45889872 | 0,00117562 |
| Signal peptide peptidase like 2a                                     | <i>Sppl2a</i>  | 1,45845918 | 0,00225228 |
| E2f transcription factor 8                                           | <i>E2f8</i>    | 1,45822979 | 0,00216148 |
| Nadh dehydrogenase (ubiquinone) 1 alpha subcomplex, 8                | <i>Ndufa8</i>  | 1,45797426 | 0,00022107 |
| Kinesin family member c2                                             | <i>Kifc2</i>   | 1,45794566 | 0,00102868 |
| Exportin, trna (nuclear export receptor for trnas)                   | <i>Xpot</i>    | 1,45787907 | 0,00275666 |
| Galactose-4-epimerase, udp                                           | <i>Gale</i>    | 1,45752844 | 0,0002072  |
| Calpastatin                                                          | <i>Cast</i>    | 1,4574606  | 0,00053484 |
| Zinc finger protein 954                                              | <i>Zfp954</i>  | 1,45718211 | 0,00122557 |
| Udp-glucuronate decarboxylase 1                                      | <i>Uxs1</i>    | 1,45708911 | 0,00049667 |
| Cystatin e/m                                                         | <i>Cst6</i>    | 1,4570805  | 0,00609317 |
| Nucleosome assembly protein 1-like 4                                 | <i>Nap1l4</i>  | 1,45677447 | 7,77e-05   |
| Vaccinia related kinase 2                                            | <i>Vrk2</i>    | 1,45630385 | 0,0073124  |
| Glucosamine (udp-n-acetyl)-2-epimerase/n-acetylmannosamine kinase    | <i>Gne</i>     | 1,45609108 | 0,00461472 |
| Catalase                                                             | <i>Cat</i>     | 1,4560884  | 0,00157302 |
| Solute carrier family 23 (nucleobase transporters), member 1         | <i>Slc23a1</i> | 1,45569567 | 0,00417435 |
| Zinc finger, miz-type containing 2                                   | <i>Zmiz2</i>   | 1,45566465 | 0,00244918 |
| Nmda receptor synaptonuclear signaling and neuronal migration factor | <i>Nsmf</i>    | 1,45541013 | 0,00088927 |
| Lon peptidase 2, peroxisomal                                         | <i>Lonp2</i>   | 1,4553374  | 0,00042872 |
| Biliverdin reductase a                                               | <i>Blvra</i>   | 1,45525395 | 0,00032306 |
| Nuclear receptor subfamily 1, group d, member 1                      | <i>Nr1d1</i>   | 1,45444072 | 0,0039557  |
| Immediate early response 5-like                                      | <i>Ier5l</i>   | 1,45434254 | 0,00451918 |
| Tetratricopeptide repeat domain 28                                   | <i>Ttc28</i>   | 1,45422489 | 0,00705773 |
| Arp2 actin-related protein 2                                         | <i>Actr2</i>   | 1,45327475 | 0,00049011 |
| Lyr motif containing 5                                               | <i>Lyrn5</i>   | 1,45276736 | 0,00957156 |
| Calmodulin binding transcription activator 2                         | <i>Camta2</i>  | 1,45273559 | 0,00071397 |
| Jumonji domain containing 8                                          | <i>Jmjd8</i>   | 1,45271609 | 0,00216276 |
| Cysteine-rich hydrophobic domain 1                                   | <i>Chic1</i>   | 1,45268264 | 0,00744143 |
| F-box protein 3                                                      | <i>Fbxo3</i>   | 1,45266606 | 0,00367729 |
| Utp6, small subunit (ssu) processome component, homolog (yeast)      | <i>Utp6</i>    | 1,4523173  | 0,00135608 |
| Iscu iron-sulfur cluster scaffold homolog (e. Coli)                  | <i>Iscu</i>    | 1,45216671 | 0,00017988 |
| Nfkb inhibitor interacting ras-like protein 1                        | <i>Nkiras1</i> | 1,4520974  | 0,00220136 |
| Kringle containing transmembrane protein 1                           | <i>Kremen1</i> | 1,45141817 | 0,0012006  |
| Ecto-nox disulfide-thiol exchanger 2                                 | <i>Enox2</i>   | 1,45124272 | 0,00387873 |

|                                                                                           |                  |            |            |
|-------------------------------------------------------------------------------------------|------------------|------------|------------|
| Retinoic acid receptor responder (tazarotene induced) 2                                   | <i>Rarres2</i>   | 1,45115522 | 0,00037394 |
| Asparagine-linked glycosylation 14                                                        | <i>Alg14</i>     | 1,45108884 | 0,00113322 |
| Cdc42 small effector 1                                                                    | <i>Cdc42se1</i>  | 1,45085162 | 0,00246176 |
| Solute carrier family 25 (mitochondrial carrier, brain), member 14                        | <i>Slc25a14</i>  | 1,45016422 | 0,00030249 |
| Ethanolamine kinase 1                                                                     | <i>Etnk1</i>     | 1,44995091 | 0,00019347 |
| Splicing factor 3a, subunit 1                                                             | <i>Sf3a1</i>     | 1,44978372 | 0,00035001 |
| Peptidylprolyl isomerase (cyclophilin)-like 2                                             | <i>Ppil2</i>     | 1,44933612 | 0,00262568 |
| Tho complex 1                                                                             | <i>Thoc1</i>     | 1,44905242 | 0,0002289  |
| Promyelocytic leukemia                                                                    | <i>Pml</i>       | 1,44901755 | 0,0001371  |
| Neural cell adhesion molecule 1                                                           | <i>Ncam1</i>     | 1,44882476 | 0,00730816 |
| Selenocysteine lyase                                                                      | <i>Scly</i>      | 1,44775426 | 0,00759188 |
| Signal recognition particle 19                                                            | <i>Srp19</i>     | 1,44765885 | 0,00476996 |
| Mitochondrial ribosomal protein s21                                                       | <i>Mrps21</i>    | 1,44728619 | 0,00054824 |
| Pyruvate dehydrogenase e1 alpha 1                                                         | <i>Pdha1</i>     | 1,4465762  | 0,00075027 |
| Inner membrane protein, mitochondrial                                                     | <i>Immt</i>      | 1,44645375 | 0,00172305 |
| Udp-n-acetyl-alpha-d-galactosamine:polypeptide n-acetylgalactosaminyltransferase 4        | <i>Galnt4</i>    | 1,4459022  | 0,00127219 |
| Family with sequence similarity 220, member a                                             | <i>Fam220a</i>   | 1,44584546 | 0,00151645 |
| Diazepam binding inhibitor-like 5                                                         | <i>Dbil5</i>     | 1,44582568 | 0,00419233 |
| Propionyl coenzyme a carboxylase, beta polypeptide                                        | <i>Pccb</i>      | 1,44462917 | 0,0015054  |
| Activating transcription factor 7 interacting protein                                     | <i>Atf7ip</i>    | 1,44413368 | 0,00338831 |
| Uhrf1 (icbp90) binding protein 1-like                                                     | <i>Uhrf1bp1l</i> | 1,44402124 | 0,00046176 |
| Coiled-coil domain containing 34                                                          | <i>Ccdc34</i>    | 1,44395427 | 0,00027783 |
| Letm1 domain containing 1                                                                 | <i>Letmd1</i>    | 1,44376082 | 0,00290619 |
| High mobility group at-hook 2                                                             | <i>Hmga2</i>     | 1,44311714 | 0,00110924 |
| Cullin associated and neddylation disassociated 1                                         | <i>Cand1</i>     | 1,44309127 | 0,00059082 |
| Twist basic helix-loop-helix transcription factor 1                                       | <i>Twist1</i>    | 1,44263382 | 0,00084656 |
| Potassium intermediate/small conductance calcium-activated channel, subfamily n, member 4 | <i>Kcnm4</i>     | 1,44248026 | 0,0054838  |
| Ptk2 protein tyrosine kinase 2 beta                                                       | <i>Ptk2b</i>     | 1,44238905 | 0,00531517 |
| Annexin a7                                                                                | <i>Anxa7</i>     | 1,44223828 | 0,00015449 |
| Cytochrome c-1                                                                            | <i>Cyc1</i>      | 1,44219671 | 0,00025706 |
| Ubiquitin specific peptidase 15                                                           | <i>Usp15</i>     | 1,44210707 | 0,00036121 |
| Mediator complex subunit 15                                                               | <i>Med15</i>     | 1,44180057 | 0,0006066  |
| Paternally expressed 12                                                                   | <i>Peg12</i>     | 1,44015447 | 0,00018611 |
| Sorting nexin 16                                                                          | <i>Snx16</i>     | 1,43961954 | 0,00079238 |
| A disintegrin and metallopeptidase domain 5                                               | <i>Adam5</i>     | 1,43930238 | 0,00122391 |
| Kn motif and ankyrin repeat domains 2                                                     | <i>Kank2</i>     | 1,43912873 | 0,00701192 |
| Dihydrolipoamide s-acetyltransferase (e2 component of pyruvate dehydrogenase complex)     | <i>Dlat</i>      | 1,43905886 | 0,00265878 |
| Splicing factor 3b, subunit 5                                                             | <i>Sf3b5</i>     | 1,43838816 | 0,00036659 |
| Phosphatase domain containing, paladin 1                                                  | <i>Pal1</i>      | 1,43838614 | 0,00091433 |
| Bicaudal d homolog 2 (drosophila)                                                         | <i>Bicd2</i>     | 1,43838603 | 0,00111011 |
| Sam domain and hd domain, 1                                                               | <i>Samhd1</i>    | 1,43806853 | 0,00187372 |
| Aly/ref export factor                                                                     | <i>Alyref</i>    | 1,43794994 | 0,00447012 |

|                                                                                       |                          |            |            |
|---------------------------------------------------------------------------------------|--------------------------|------------|------------|
| Rap guanine nucleotide exchange factor (gef) 1                                        | <i>Rapgef1</i>           | 1,43762083 | 0,00156444 |
| Set and mynd domain containing 2                                                      | <i>Smyd2</i>             | 1,43747187 | 0,00072924 |
| Synaptotagmin iv                                                                      | <i>Syt4</i>              | 1,43746326 | 0,00386725 |
| Polymerase (dna directed), epsilon 2 (p59 subunit)                                    | <i>Pole2</i>             | 1,43740828 | 0,00026891 |
| Malate dehydrogenase 1, nad (soluble)                                                 | <i>Mdh1</i>              | 1,43720571 | 0,00063325 |
| Upf3 regulator of nonsense transcripts homolog b (yeast)                              | <i>Upf3b</i>             | 1,43673401 | 0,00033899 |
| Archaealysin family metallopeptidase 2                                                | <i>Amz2</i>              | 1,43641677 | 0,00194351 |
| Atpase, h <sup>+</sup> transporting, lysosomal v1 subunit c1                          | <i>Atp6v1c1</i>          | 1,43620914 | 0,00159899 |
| Syntaxin 4a (placental)                                                               | <i>Stx4a</i>             | 1,43610973 | 0,00396025 |
| Absent in melanoma 2                                                                  | <i>Aim2</i>              | 1,43610743 | 0,00793365 |
| Interferon activated gene 205 /// myeloid cell nuclear differentiation antigen        | <i>Ifi205 /// mnda</i>   | 1,43581338 | 0,00050524 |
| Actinin, alpha 1                                                                      | <i>Actn1</i>             | 1,43525274 | 0,0002485  |
| Solute carrier family 9 (sodium/hydrogen exchanger), member 8                         | <i>Slc9a8</i>            | 1,43491183 | 0,00186068 |
| Makorin, ring finger protein, 1                                                       | <i>Mkrrn1</i>            | 1,43469509 | 0,00268036 |
| Eukaryotic translation initiation factor 4b                                           | <i>Eif4b</i>             | 1,43453951 | 0,0002843  |
| Mitogen-activated protein kinase kinase 3, opposite strand                            | <i>Map2k3os</i>          | 1,43452822 | 0,00030723 |
| Biliverdin reductase b (flavin reductase (nadph))                                     | <i>Blvrb</i>             | 1,43431045 | 0,00238834 |
| Harvey rat sarcoma oncogene, subgroup r                                               | <i>Rras</i>              | 1,43391177 | 0,00100833 |
| Rogdi homolog (drosophila)                                                            | <i>Rogdi</i>             | 1,43303648 | 0,0011018  |
| Exocyst complex component 6 /// sh3-domain grb2-like b1 (endophilin)                  | <i>Exoc6 /// sh3glb1</i> | 1,43300133 | 0,00395224 |
| Histone deacetylase 3                                                                 | <i>Hdac3</i>             | 1,43291613 | 0,00013401 |
| Mitochondrial ribosomal protein l23                                                   | <i>Mrpl23</i>            | 1,43249517 | 0,001088   |
| Ankyrin repeat domain 24                                                              | <i>Ankrd24</i>           | 1,43237786 | 0,00108107 |
| Solute carrier family 4 (anion exchanger), member 2                                   | <i>Slc4a2</i>            | 1,43233699 | 0,00097122 |
| Polymerase (dna-directed), delta 4                                                    | <i>Pold4</i>             | 1,43183985 | 0,0007317  |
| Nudix (nucleoside diphosphate linked moiety x)-type motif 5                           | <i>Nudt5</i>             | 1,43180926 | 0,00210005 |
| Rab5b, member ras oncogene family                                                     | <i>Rab5b</i>             | 1,43076485 | 0,00744219 |
| Tetratricopeptide repeat domain 7b                                                    | <i>Ttc7b</i>             | 1,4301402  | 0,00756216 |
| Cyclin d3                                                                             | <i>Ccnd3</i>             | 1,42961817 | 0,0004965  |
| Guanine nucleotide binding protein (g protein), beta 2                                | <i>Gnb2</i>              | 1,42952248 | 0,00070838 |
| Excision repair cross-complementing rodent repair deficiency, complementation group 5 | <i>Ercc5</i>             | 1,4295156  | 0,0054838  |
| Nuf2, ndc80 kinetochore complex component, homolog (s. Cerevisiae)                    | <i>Nuf2</i>              | 1,42900626 | 0,00187049 |
| Oral cancer overexpressed 1                                                           | <i>Oraov1</i>            | 1,42732326 | 0,00057714 |
| Ubiquitin-conjugating enzyme e2e 3                                                    | <i>Ube2e3</i>            | 1,42730368 | 0,00032207 |
| Charged multivesicular body protein 3                                                 | <i>Chmp3</i>             | 1,42708065 | 0,00256367 |
| Family with sequence similarity 222, member b                                         | <i>Fam222b</i>           | 1,42634411 | 0,00461472 |
| Autophagy related 5                                                                   | <i>Atg5</i>              | 1,42626862 | 0,00908386 |
| Transmembrane protein 189                                                             | <i>Tmem189</i>           | 1,42528057 | 0,00065916 |
| Two pore segment channel 2                                                            | <i>Tpcn2</i>             | 1,42515972 | 0,00101441 |
| Run and fyve domain containing 1                                                      | <i>Rufy1</i>             | 1,42512396 | 0,00065173 |

|                                                                                             |                         |            |            |
|---------------------------------------------------------------------------------------------|-------------------------|------------|------------|
| Tubulin, gamma complex associated protein 2                                                 | <i>Tubgcp2</i>          | 1,42498233 | 0,0002118  |
| 4-nitrophenylphosphatase domain and non-neuronal snap25-like protein homolog 1 (c. Elegans) | <i>Nipsnap1</i>         | 1,42478266 | 0,00353489 |
| Nadh dehydrogenase (ubiquinone) 1, subcomplex unknown, 1                                    | <i>Ndufc1</i>           | 1,4241854  | 0,00063174 |
| Protein phosphatase methylesterase 1                                                        | <i>Ppme1</i>            | 1,42368213 | 0,00034882 |
| Ring finger protein 121                                                                     | <i>Rnf121</i>           | 1,42272042 | 0,00372109 |
| Actinin alpha 4                                                                             | <i>Actn4</i>            | 1,42255943 | 0,00050928 |
| Prostate tumor over expressed gene 1                                                        | <i>Ptov1</i>            | 1,42158471 | 0,00074952 |
| Coiled-coil domain containing 28a                                                           | <i>Ccdc28a</i>          | 1,42135913 | 0,00326907 |
| Protein tyrosine phosphatase, non-receptor type 5                                           | <i>Ptpn5</i>            | 1,42119261 | 0,00861319 |
| Riken cDNA 1110038f14 gene                                                                  | <i>1110038f14rik</i>    | 1,42025998 | 0,00038924 |
| Interferon, alpha-inducible protein 27 like 2b                                              | <i>Ifi27l2b</i>         | 1,4201493  | 0,00208223 |
| Ring finger protein 123                                                                     | <i>Rnf123</i>           | 1,41971684 | 0,00209576 |
| Diacylglycerol kinase zeta                                                                  | <i>Dgkz</i>             | 1,41960713 | 0,00417651 |
| Integrin beta 4                                                                             | <i>Itgb4</i>            | 1,41846706 | 0,00019337 |
| Interleukin 15 receptor, alpha chain                                                        | <i>Il15ra</i>           | 1,41826389 | 0,00452999 |
| Nadh dehydrogenase (ubiquinone) 1 beta subcomplex, 6                                        | <i>Ndufb6</i>           | 1,41719792 | 0,00100326 |
| Carnitine acetyltransferase                                                                 | <i>Crat</i>             | 1,41697874 | 0,0040619  |
| Phd finger protein 1                                                                        | <i>Phf1</i>             | 1,41684758 | 0,00194351 |
| Solute carrier family 25 (mitochondrial thiamine pyrophosphate carrier), member 19          | <i>Slc25a19</i>         | 1,41643951 | 0,00522131 |
| Chromatin accessibility complex 1                                                           | <i>Chrac1</i>           | 1,41598782 | 0,00028396 |
| Rfng o-fucosylpeptide 3-beta-n-acetylglucosaminyltransferase                                | <i>Rfng</i>             | 1,41489966 | 0,00332683 |
| E2f-associated phosphoprotein                                                               | <i>Eapp</i>             | 1,41479323 | 0,00480912 |
| Otu deubiquitinase with linear linkage specificity                                          | <i>Otulin</i>           | 1,41454927 | 0,00034909 |
| Phosphatidic acid phosphatase type 2b                                                       | <i>Ppap2b</i>           | 1,41454126 | 0,00545386 |
| Homeobox a7                                                                                 | <i>Hoxa7</i>            | 1,41411821 | 0,0041875  |
| Cts telomere maintenance complex component 1                                                | <i>Ctc1</i>             | 1,41398449 | 0,00057875 |
| Uridine phosphorylase 1                                                                     | <i>Upp1</i>             | 1,41332506 | 0,00571562 |
| Tensin like c1 domain-containing phosphatase                                                | <i>Tenc1</i>            | 1,41321493 | 0,0034564  |
| Cytidine monophospho-n-acetylneuraminic acid synthetase                                     | <i>Cmas</i>             | 1,41285927 | 0,00098755 |
| Alpha-kinase 2                                                                              | <i>Alpk2</i>            | 1,41179767 | 0,00840206 |
| Thioredoxin domain containing 16                                                            | <i>Txndc16</i>          | 1,41156997 | 0,00455118 |
| Dynamin 2                                                                                   | <i>Dnm2</i>             | 1,41130257 | 0,00217352 |
| Calcineurin-like EF hand protein 1 /// predicted gene, 20056                                | <i>Chp1 /// gm20056</i> | 1,4109868  | 0,00054421 |
| Phospholipase A2 receptor 1                                                                 | <i>Pla2r1</i>           | 1,41098334 | 0,00113342 |
| M-phase phosphoprotein 8                                                                    | <i>Mphosph8</i>         | 1,41096656 | 0,00021552 |
| Coiled-coil-helix-coiled-coil-helix domain containing 6                                     | <i>Chchd6</i>           | 1,41025217 | 0,00091504 |
| Peptidase (mitochondrial processing) beta                                                   | <i>Pmpcb</i>            | 1,41009698 | 0,00837355 |
| Swi5 recombination repair homolog (yeast)                                                   | <i>Swi5</i>             | 1,41002447 | 0,00055154 |
| Glutathione synthetase                                                                      | <i>Gss</i>              | 1,40993447 | 0,00044441 |
| Succinate dehydrogenase complex, subunit c, integral membrane protein                       | <i>Sdhc</i>             | 1,40936515 | 0,00948976 |

|                                                                                     |                         |            |            |
|-------------------------------------------------------------------------------------|-------------------------|------------|------------|
| Rab22a, member ras oncogene family                                                  | <i>Rab22a</i>           | 1,40934988 | 0,00266679 |
| Riken cdna 1110032a03 gene                                                          | <i>1110032a03rik</i>    | 1,40929816 | 0,00965065 |
| Membrane protein, palmitoylated                                                     | <i>Mpp1</i>             | 1,40916671 | 0,0009297  |
| Transmembrane bax inhibitor motif containing 6                                      | <i>Tmbim6</i>           | 1,40882736 | 0,00206478 |
| Ranbp-type and c3hc4-type zinc finger containing 1                                  | <i>Rbck1</i>            | 1,40848437 | 0,00111861 |
| Replication termination factor 2 domain containing 1                                | <i>Rtfdc1</i>           | 1,40843416 | 0,00370325 |
| Urocanase domain containing 1                                                       | <i>Uroc1</i>            | 1,40800219 | 0,00287133 |
| Single immunoglobulin and toll-interleukin 1 receptor (tir) domain                  | <i>Sigirr</i>           | 1,4078644  | 0,00104701 |
| Ribosomal protein l22 like 1                                                        | <i>Rpl22l1</i>          | 1,40771649 | 0,00043619 |
| Ectonucleoside triphosphate diphosphohydrolase 6                                    | <i>Entpd6</i>           | 1,40754894 | 0,00816157 |
| Ctd (carboxy-terminal domain, rna polymerase ii, polypeptide a) small phosphatase 2 | <i>Ctdsp2</i>           | 1,40702567 | 0,00034472 |
| Apaf1 interacting protein                                                           | <i>Apip</i>             | 1,40700295 | 0,00061214 |
| Cdna sequence bc003331                                                              | <i>Bc003331</i>         | 1,40699358 | 0,00246805 |
| Pleckstrin homology domain containing, family a member 5                            | <i>Plekha5</i>          | 1,40678845 | 0,0017047  |
| Nima (never in mitosis gene a)-related expressed kinase 4                           | <i>Nek4</i>             | 1,40666097 | 0,00367043 |
| Acyl-coa thioesterase 9                                                             | <i>Acot9</i>            | 1,40648325 | 0,00028982 |
| Acyl-coa thioesterase 10 /// acyl-coa thioesterase 9                                | <i>Acot10 /// acot9</i> | 1,40647802 | 0,00023627 |
| Adp-ribosylation factor 1                                                           | <i>Arf1</i>             | 1,4064747  | 0,00991416 |
| Riken cdna 2310067b10 gene                                                          | <i>2310067b10rik</i>    | 1,40628627 | 0,00087096 |
| Glutathione peroxidase 4                                                            | <i>Gpx4</i>             | 1,40612972 | 0,00044193 |
| Phosphate cytidylyltransferase 1, choline, alpha isoform                            | <i>Pcyt1a</i>           | 1,4052581  | 0,00309698 |
| Enhancer of zeste homolog 2 (drosophila)                                            | <i>Ezh2</i>             | 1,40491517 | 0,00133725 |
| Transmembrane 7 superfamily member 3                                                | <i>Tm7sf3</i>           | 1,40383631 | 0,00978522 |
| Cut-like homeobox 1                                                                 | <i>Cux1</i>             | 1,40377615 | 0,00645718 |
| Protein phosphatase 6, catalytic subunit                                            | <i>Ppp6c</i>            | 1,40367012 | 0,00163784 |
| Apoptosis enhancing nuclease                                                        | <i>Aen</i>              | 1,40332881 | 0,0017522  |
| Scm-like with four mbt domains 1                                                    | <i>Sfnbt1</i>           | 1,40280077 | 0,00201029 |
| Uridine-cytidine kinase 1                                                           | <i>Uck1</i>             | 1,40263139 | 0,00071934 |
| Ino80 complex subunit b                                                             | <i>Ino80b</i>           | 1,40236681 | 0,00850425 |
| Translocase of inner mitochondrial membrane 13                                      | <i>Timm13</i>           | 1,40232848 | 0,00037487 |
| Solute carrier family 25 (mitochondrial carrier, phosphate carrier), member 3       | <i>Slc25a3</i>          | 1,4021832  | 0,00033453 |
| Tcdd-inducible poly(adp-ribose) polymerase                                          | <i>Tiparp</i>           | 1,40189698 | 0,00509205 |
| Lyr motif containing 2                                                              | <i>Lyrn2</i>            | 1,40175012 | 0,00183536 |
| Anaphase promoting complex c subunit 15                                             | <i>Anapc15</i>          | 1,40142662 | 0,00074953 |
| Angiopoietin 4                                                                      | <i>Angpt4</i>           | 1,40127708 | 0,00546102 |
| Phosphomannomutase 2                                                                | <i>Pmm2</i>             | 1,40058161 | 0,00151382 |
| Solute carrier family 22, member 23                                                 | <i>Slc22a23</i>         | 1,40033509 | 0,00076599 |
| Kinesin family member 3c                                                            | <i>Kif3c</i>            | 1,40024883 | 0,00158988 |
| Fanconi anemia, complementation group g                                             | <i>Fancg</i>            | 1,4001991  | 0,00239707 |
| Rab3a, member ras oncogene family                                                   | <i>Rab3a</i>            | 1,39979434 | 0,00640062 |
| Rna binding motif protein, x-linked 2                                               | <i>Rbm2</i>             | 1,39972227 | 0,00461661 |



|                                                                                      |                 |            |            |
|--------------------------------------------------------------------------------------|-----------------|------------|------------|
| Fanconi anemia, complementation group i                                              | <i>Fanci</i>    | 1,39889942 | 0,00083754 |
| Dna methyltransferase (cytosine-5) 1                                                 | <i>Dnmt1</i>    | 1,39865817 | 0,0009069  |
| Kelch-like 7                                                                         | <i>Klhl7</i>    | 1,39863619 | 0,00545623 |
| Adp-ribosylation factor gtpase activating protein 2                                  | <i>Arfgap2</i>  | 1,39850167 | 0,00155094 |
| Brick1, scar/wave actin-nucleating complex subunit                                   | <i>Brk1</i>     | 1,39818946 | 0,00108332 |
| Ww domain binding protein 1                                                          | <i>Wbp1</i>     | 1,39714449 | 0,00096564 |
| Cdkn1a interacting zinc finger protein 1                                             | <i>Ciz1</i>     | 1,39682297 | 0,0010691  |
| Bromodomain adjacent to zinc finger domain, 2a                                       | <i>Baz2a</i>    | 1,39550415 | 0,00058301 |
| Vinculin                                                                             | <i>Vcl</i>      | 1,39512793 | 0,00155039 |
| Glial cells missing homolog 1 (drosophila)                                           | <i>Gcm1</i>     | 1,39423498 | 0,00730718 |
| Mif4g domain containing                                                              | <i>Mif4gd</i>   | 1,39395153 | 0,00229516 |
| Proteasome (prosome, macropain) 26s subunit, non-atpase, 11                          | <i>Psm11</i>    | 1,3938757  | 0,00170082 |
| Transmembrane protein 205                                                            | <i>Tmem205</i>  | 1,39325894 | 0,00160305 |
| Tumor suppressor candidate 2                                                         | <i>Tusc2</i>    | 1,39321934 | 0,00081765 |
| Aminoacylase 1                                                                       | <i>Acy1</i>     | 1,39318132 | 0,0032524  |
| Transcription elongation factor a (sii)-like 1                                       | <i>Tceal1</i>   | 1,39302116 | 0,00433875 |
| Coiled-coil domain containing 65                                                     | <i>Ccdc65</i>   | 1,39216663 | 0,00092713 |
| Tetratricopeptide repeat domain 4                                                    | <i>Ttc4</i>     | 1,39211688 | 0,00305901 |
| Transmembrane protein 30a                                                            | <i>Tmem30a</i>  | 1,39211436 | 0,00684497 |
| Trinucleotide repeat containing 6b                                                   | <i>Tnrc6b</i>   | 1,391747   | 0,00229536 |
| Calcium and integrin binding 1 (calmyrin)                                            | <i>Cib1</i>     | 1,39168907 | 0,00149434 |
| Neuronal guanine nucleotide exchange factor                                          | <i>Ngef</i>     | 1,39140195 | 0,0007951  |
| Ribonucleotide reductase m1                                                          | <i>Rrm1</i>     | 1,39131994 | 0,00049506 |
| Myb-related transcription factor, partner of profilin                                | <i>Mypop</i>    | 1,39120526 | 0,00257661 |
| Dead (asp-glu-ala-asp) box polypeptide 41                                            | <i>Ddx41</i>    | 1,39076897 | 0,00209686 |
| Udp-n-acetyl-alpha-d-galactosamine:polypeptide n-acetyl-galactosaminyltransferase 10 | <i>Galnt10</i>  | 1,39040007 | 0,00072372 |
| Yme1-like 1 (s. Cerevisiae)                                                          | <i>Yme1l1</i>   | 1,38991556 | 0,00643418 |
| Vaccinia related kinase 3                                                            | <i>Vrk3</i>     | 1,38969156 | 0,00071821 |
| Translin                                                                             | <i>Tsn</i>      | 1,38961525 | 0,0094721  |
| Erythroid differentiation regulatory factor 1                                        | <i>Edrf1</i>    | 1,38936696 | 0,0021739  |
| Dynactin 5                                                                           | <i>Dctn5</i>    | 1,38901779 | 0,00208683 |
| Tbc1 domain family, member 1                                                         | <i>Tbc1d1</i>   | 1,38896717 | 0,00790114 |
| Family with sequence similarity 120, member b                                        | <i>Fam120b</i>  | 1,3884743  | 0,0019914  |
| Glycerophosphodiester phosphodiesterase domain containing 5                          | <i>Gdpd5</i>    | 1,38836646 | 0,00169161 |
| Udp-n-acetylglucosamine pyrophosphorylase 1                                          | <i>Uap1</i>     | 1,38830227 | 0,00088534 |
| Rho guanine nucleotide exchange factor (gef) 25                                      | <i>Arhgef25</i> | 1,38820757 | 0,00784434 |
| Traf type zinc finger domain containing 1                                            | <i>Traf1</i>    | 1,38786681 | 0,00315345 |
| Signal recognition particle 14                                                       | <i>Srp14</i>    | 1,38779758 | 0,00061538 |
| Roundabout homolog 3 (drosophila)                                                    | <i>Robo3</i>    | 1,38763023 | 0,0064082  |
| Lim and senescent cell antigen-like domains 1                                        | <i>Lims1</i>    | 1,38752145 | 0,00241841 |
| Coagulation factor x                                                                 | <i>F10</i>      | 1,38746848 | 0,00349155 |
| Ubiquitin protein ligase e3 component n-recogin 1                                    | <i>Ubr1</i>     | 1,38680177 | 0,00705404 |
| N-methylpurine-dna glycosylase                                                       | <i>Mpg</i>      | 1,38636454 | 0,00265497 |

|                                                                                                   |                              |            |            |
|---------------------------------------------------------------------------------------------------|------------------------------|------------|------------|
| Nima (never in mitosis gene a)-related expressed kinase 8                                         | <i>Nek8</i>                  | 1,38601097 | 0,00159378 |
| General transcription factor iiic, polypeptide 5                                                  | <i>Gtf3c5</i>                | 1,38568016 | 0,00137428 |
| Nadh dehydrogenase (ubiquinone) fe-s protein 1                                                    | <i>Ndufs1</i>                | 1,38560187 | 0,00436043 |
| Solute carrier family 35, member a5                                                               | <i>Slc35a5</i>               | 1,38555214 | 0,00251818 |
| Aldo-keto reductase family 1, member e1                                                           | <i>Akr1e1</i>                | 1,38513517 | 0,00665432 |
| Cytochrome p450, family 2, subfamily j, polypeptide 9                                             | <i>Cyp2j9</i>                | 1,38488318 | 0,00083356 |
| Membrane-associated ring finger (c3hc4) 6                                                         | <i>Iii.06</i>                | 1,38487476 | 0,00139968 |
| Cdna sequence bc048403                                                                            | <i>Bc048403</i>              | 1,38459705 | 0,00414133 |
| Mitochondrial ribosomal protein l14                                                               | <i>Mrpl14</i>                | 1,38425769 | 0,00230272 |
| Serine/threonine kinase 25 (yeast)                                                                | <i>Stk25</i>                 | 1,38405497 | 0,0002762  |
| Riken cdna 1700071k01 gene /// prohibitin                                                         | <i>1700071k01rik /// phb</i> | 1,3836545  | 0,00132066 |
| Myotubularin related protein 6                                                                    | <i>Mtmr6</i>                 | 1,38351383 | 0,00418584 |
| Rna binding motif protein 14                                                                      | <i>Rbm14</i>                 | 1,3834749  | 0,00091066 |
| Protein phosphatase 2a activator, regulatory subunit b                                            | <i>Ppp2r4</i>                | 1,38317283 | 0,00894206 |
| Dcp1 decapping enzyme homolog a (s. Cerevisiae)                                                   | <i>Dcp1a</i>                 | 1,38317257 | 0,00043644 |
| Wd repeat, sam and u-box domain containing 1                                                      | <i>Wdsub1</i>                | 1,38287548 | 0,00212222 |
| Protein kinase, interferon inducible double stranded rna dependent activator                      | <i>Prkra</i>                 | 1,38280798 | 0,00137052 |
| Tubulin polyglutamylase complex subunit 1                                                         | <i>Tpgs1</i>                 | 1,38267575 | 0,00450375 |
| Interferon-induced protein with tetratricopeptide repeats 2                                       | <i>Ifit2</i>                 | 1,38261212 | 0,00055305 |
| Cysteine-rich with egf-like domains 2                                                             | <i>Creld2</i>                | 1,3825009  | 0,00145352 |
| Tlc domain containing 1                                                                           | <i>Tlcd1</i>                 | 1,38230248 | 0,00414834 |
| Transcription factor a, mitochondrial                                                             | <i>Tfam</i>                  | 1,38227323 | 0,00162368 |
| Unc-51 like kinase 2                                                                              | <i>Ulk2</i>                  | 1,38137025 | 0,00083745 |
| Siva1, apoptosis-inducing factor                                                                  | <i>Siva1</i>                 | 1,38122421 | 0,00075475 |
| Zinc finger protein 219                                                                           | <i>Zfp219</i>                | 1,38072173 | 0,00539899 |
| Mitochondrial ribosomal protein s11                                                               | <i>Mrps11</i>                | 1,38045013 | 0,0020947  |
| Phd finger protein 19                                                                             | <i>Phf19</i>                 | 1,38026702 | 0,00236016 |
| Tubulin alpha, related sequence 1                                                                 | <i>Tuba-rs1</i>              | 1,37995247 | 0,00993568 |
| Swi/snf related, matrix associated, actin dependent regulator of chromatin, subfamily d, member 1 | <i>Smardc1</i>               | 1,37955582 | 0,00505576 |
| Phosphatidic acid phosphatase type 2c                                                             | <i>Ppap2c</i>                | 1,37926776 | 0,00043012 |
| Actin related protein 2/3 complex, subunit 5                                                      | <i>Arpc5</i>                 | 1,37908837 | 0,00062801 |
| Atp synthase, h+ transporting, mitochondrial f0 complex, subunit f2                               | <i>Atp5j2</i>                | 1,37902382 | 0,00293797 |
| Integrator complex subunit 4                                                                      | <i>Ints4</i>                 | 1,37897349 | 0,0007385  |
| Pleiotropic regulator 1, prl1 homolog (arabidopsis)                                               | <i>Plrg1</i>                 | 1,37897083 | 0,00056158 |
| Lim and sh3 protein 1                                                                             | <i>Lasp1</i>                 | 1,37840586 | 0,00442356 |
| Cytohesin 1                                                                                       | <i>Cyth1</i>                 | 1,37807769 | 0,00181778 |
| Methyl cpG binding protein 2                                                                      | <i>Mecp2</i>                 | 1,37796884 | 0,00919691 |
| Heat repeat containing 6                                                                          | <i>Heatr6</i>                | 1,37789531 | 0,00188045 |
| Dehydrogenase/reductase (sdr family) member 7                                                     | <i>Dhrs7</i>                 | 1,37789453 | 0,00101415 |
| Riken cdna 4930429b21 gene                                                                        | <i>4930429b21rik</i>         | 1,37774055 | 0,00719036 |
| Zinc finger protein 386 (kruppel-like)                                                            | <i>Zfp386</i>                | 1,37757669 | 0,00078296 |

|                                                         |                |            |            |
|---------------------------------------------------------|----------------|------------|------------|
| 6-phosphofructo-2-kinase/fructose-2,6-biphosphatase 2   | <i>Pfkfb2</i>  | 1,37639169 | 0,00293871 |
| Steroid 5 alpha-reductase 3                             | <i>Srd5a3</i>  | 1,37637351 | 0,00155912 |
| Major facilitator superfamily domain containing 1       | <i>Mfsd1</i>   | 1,37571693 | 0,00146859 |
| Centromere protein h                                    | <i>Cenph</i>   | 1,37568097 | 0,00902867 |
| Ecsit homolog (drosophila)                              | <i>Ecsit</i>   | 1,37565957 | 0,00490418 |
| Dnaj (hsp40) homolog, subfamily b, member 1             | <i>Dnajb1</i>  | 1,37563215 | 0,00209021 |
| Zinc finger protein 277                                 | <i>Zfp277</i>  | 1,37557802 | 0,00669478 |
| Tsr2 20s rrna accumulation                              | <i>Tsr2</i>    | 1,37534164 | 0,00070797 |
| Ataxin 2                                                | <i>Atxn2</i>   | 1,37524345 | 0,00397883 |
| Rex4, rna exonuclease 4 homolog (s. Cerevisiae)         | <i>Rexo4</i>   | 1,37471851 | 0,00337182 |
| Kelch-like 5                                            | <i>Klhl5</i>   | 1,3741974  | 0,0009318  |
| Ras, dexamethasone-induced 1                            | <i>Rasd1</i>   | 1,37397714 | 0,00131526 |
| Glucose 6 phosphatase, catalytic, 3                     | <i>G6pc3</i>   | 1,37391657 | 0,00134672 |
| Ubiquitin specific peptidase 5 (isopeptidase t)         | <i>Usp5</i>    | 1,37359661 | 0,00178235 |
| Protein phosphatase 4, regulatory subunit 2             | <i>Ppp4r2</i>  | 1,37329233 | 0,00181878 |
| Wolfram syndrome 1 homolog (human)                      | <i>Wfs1</i>    | 1,37292037 | 0,00036012 |
| Cystatin c                                              | <i>Cst3</i>    | 1,37287395 | 0,00046444 |
| Vacuolar protein sorting 26 homolog b (yeast)           | <i>Vps26b</i>  | 1,37277787 | 0,00304946 |
| Pleckstrin and sec7 domain containing 3                 | <i>Psd3</i>    | 1,3724352  | 0,00083665 |
| Lysophospholipase-like 1                                | <i>Lyplal1</i> | 1,37232447 | 0,00377633 |
| Proteasome maturation protein                           | <i>Pomp</i>    | 1,37228515 | 0,00068269 |
| Polymerase (dna directed), iota                         | <i>Poli</i>    | 1,37170622 | 0,00279345 |
| Hiv tat specific factor 1                               | <i>Htatsf1</i> | 1,37166932 | 0,00168454 |
| Ring finger protein 126                                 | <i>Rnf126</i>  | 1,37133811 | 0,00325893 |
| F-box protein 18                                        | <i>Fbxo18</i>  | 1,37091266 | 0,00048274 |
| Secretory blood group 1                                 | <i>Sec1</i>    | 1,37060505 | 0,00620543 |
| Helicase-like transcription factor                      | <i>Hltf</i>    | 1,37053851 | 0,00408454 |
| Comm domain containing 9                                | <i>Comm9</i>   | 1,37029876 | 0,00089917 |
| Slowmo homolog 2 (drosophila)                           | <i>Slmo2</i>   | 1,36990542 | 0,00695992 |
| Flavin containing monooxygenase 5                       | <i>Fmo5</i>    | 1,36976202 | 0,00548828 |
| E2f transcription factor 1                              | <i>E2f1</i>    | 1,36962757 | 0,00316084 |
| Tropomyosin 3, gamma                                    | <i>Tpm3</i>    | 1,36958304 | 0,00146729 |
| Deformed epidermal autoregulatory factor 1 (drosophila) | <i>Deaf1</i>   | 1,36935502 | 0,00865533 |
| Sar1 gene homolog b (s. Cerevisiae)                     | <i>Sar1b</i>   | 1,36932636 | 0,00469524 |
| Adnp homeobox 2                                         | <i>Adnp2</i>   | 1,36882199 | 0,00359623 |
| Galactose-1-phosphate uridyl transferase                | <i>Galt</i>    | 1,36844456 | 0,00723007 |
| Kit ligand                                              | <i>Kitl</i>    | 1,36826627 | 0,00496122 |
| Protein phosphatase 6, regulatory subunit 2             | <i>Ppp6r2</i>  | 1,36814094 | 0,00084701 |
| N-myc downstream regulated gene 4                       | <i>Ndr4</i>    | 1,36792001 | 0,00120479 |
| Small g protein signaling modulator 3                   | <i>Sgsm3</i>   | 1,36778178 | 0,00032257 |
| Forkhead box m1                                         | <i>Foxm1</i>   | 1,36770485 | 0,00306147 |
| Nadh dehydrogenase (ubiquinone) 1 alpha subcomplex, 12  | <i>Ndufa12</i> | 1,36757012 | 0,000649   |
| Exocyst complex component 4                             | <i>Exoc4</i>   | 1,36742331 | 0,00151745 |

|                                                                                                                |                                |            |            |
|----------------------------------------------------------------------------------------------------------------|--------------------------------|------------|------------|
| Brca1 associated protein                                                                                       | <i>Brap</i>                    | 1,36742147 | 0,00737763 |
| Macrophage stimulating 1 (hepatocyte growth factor-like)                                                       | <i>Mst1</i>                    | 1,36696358 | 0,00154495 |
| Vesicle-associated membrane protein 4                                                                          | <i>Vamp4</i>                   | 1,36660313 | 0,00951649 |
| E2f transcription factor 5                                                                                     | <i>E2f5</i>                    | 1,36612002 | 0,00787595 |
| Extended synaptotagmin-like protein 1                                                                          | <i>Esyt1</i>                   | 1,36609986 | 0,00090769 |
| Centriole, cilia and spindle associated protein                                                                | <i>Ccsap</i>                   | 1,36609714 | 0,00261462 |
| Nadh dehydrogenase (ubiquinone) 1 alpha subcomplex, 9                                                          | <i>Ndufa9</i>                  | 1,36466075 | 0,00063215 |
| Nadh dehydrogenase [ubiquinone] 1 subunit c2-like /// nadh dehydrogenase (ubiquinone) 1, subcomplex unknown, 2 | <i>Loc102641347 /// ndufc2</i> | 1,36455483 | 0,00351512 |
| Golgi snap receptor complex member 1                                                                           | <i>Gosr1</i>                   | 1,36451589 | 0,00762965 |
| Mitochondrial ribosomal protein l48                                                                            | <i>Mrpl48</i>                  | 1,36440761 | 0,00176029 |
| Tocopherol (alpha) transfer protein                                                                            | <i>Ttpa</i>                    | 1,36365438 | 0,0015582  |
| Branched chain ketoacid dehydrogenase kinase                                                                   | <i>Bckdk</i>                   | 1,36349627 | 0,00066855 |
| Mevalonate (diphospho) decarboxylase                                                                           | <i>Mvd</i>                     | 1,36327331 | 0,00958593 |
| Dopamine receptor d4                                                                                           | <i>Drd4</i>                    | 1,36320956 | 0,00739845 |
| Glutamic acid decarboxylase 2                                                                                  | <i>Gad2</i>                    | 1,36309822 | 0,0005387  |
| Protein inhibitor of activated stat 2                                                                          | <i>Pias2</i>                   | 1,36282228 | 0,00287183 |
| Nuclear mitotic apparatus protein 1                                                                            | <i>Numa1</i>                   | 1,36275661 | 0,00151976 |
| Fibroblast growth factor 18                                                                                    | <i>Fgf18</i>                   | 1,36256269 | 0,00350918 |
| Solute carrier family 39 (metal ion transporter), member 13                                                    | <i>Slc39a13</i>                | 1,36230089 | 0,00383471 |
| Histone deacetylase 7                                                                                          | <i>Hdac7</i>                   | 1,3622439  | 0,00667587 |
| Phosphorylase kinase gamma 1                                                                                   | <i>Phkg1</i>                   | 1,36156489 | 0,00275636 |
| Mitochondrial ribosomal protein l54                                                                            | <i>Mrpl54</i>                  | 1,36142005 | 0,00294111 |
| Interferon gamma receptor 1                                                                                    | <i>Ifngr1</i>                  | 1,36028939 | 0,00049367 |
| Inositol polyphosphate-4-phosphatase, type i                                                                   | <i>Inpp4a</i>                  | 1,36015935 | 0,00431617 |
| Cdc42 binding protein kinase alpha                                                                             | <i>Cdc42bpa</i>                | 1,36013135 | 0,0025466  |
| Calcium/calmodulin-dependent protein kinase kinase 2, beta                                                     | <i>Camkk2</i>                  | 1,36010419 | 0,00522944 |
| Polymerase (dna-directed), delta interacting protein 3                                                         | <i>Poldip3</i>                 | 1,35994535 | 0,00919995 |
| ATPase, h <sup>+</sup> transporting, lysosomal v1 subunit e1                                                   | <i>Atp6v1e1</i>                | 1,35979919 | 0,00169947 |
| Cyclic nucleotide gated channel alpha 1                                                                        | <i>Cnga1</i>                   | 1,35959561 | 0,00498541 |
| Ubiquitin associated domain containing 2                                                                       | <i>Ubac2</i>                   | 1,35892089 | 0,00099736 |
| Dna primase, p58 subunit                                                                                       | <i>Prim2</i>                   | 1,35886054 | 0,000646   |
| Translocase of outer mitochondrial membrane 40 homolog-like (yeast)                                            | <i>Tom40l</i>                  | 1,35783722 | 0,00197087 |
| Sjogren's syndrome nuclear autoantigen 1                                                                       | <i>Ssna1</i>                   | 1,35762472 | 0,00048735 |
| Microsomal glutathione s-transferase 2                                                                         | <i>Mgst2</i>                   | 1,35645392 | 0,0029667  |
| Rab5c, member ras oncogene family                                                                              | <i>Rab5c</i>                   | 1,35631073 | 0,00298464 |
| V-ras simian leukemia viral oncogene homolog a (ras related)                                                   | <i>Rala</i>                    | 1,3557392  | 0,00328571 |
| Translocated promoter region, nuclear basket protein                                                           | <i>Tpr</i>                     | 1,35542004 | 0,00232105 |
| Matrix metalloproteinase 17                                                                                    | <i>Mmp17</i>                   | 1,35511799 | 0,0006706  |
| Loricrin                                                                                                       | <i>Lor</i>                     | 1,35507516 | 0,00433239 |
| Jade family phd finger 1                                                                                       | <i>Jade1</i>                   | 1,35501302 | 0,00907162 |

|                                                         |                           |            |            |
|---------------------------------------------------------|---------------------------|------------|------------|
| Numb gene homolog (drosophila)                          | <i>Numb</i>               | 1,35457364 | 0,00513645 |
| Heat shock protein 4 like                               | <i>Hspa4l</i>             | 1,35449504 | 0,00554926 |
| Expressed sequence c78339                               | <i>C78339</i>             | 1,35446772 | 0,00048972 |
| Integrator complex subunit 1                            | <i>Ints1</i>              | 1,3544415  | 0,00631492 |
| Ring finger protein 167                                 | <i>Rnf167</i>             | 1,35436127 | 0,00161281 |
| Integrator complex subunit 9                            | <i>Ints9</i>              | 1,35420816 | 0,00720264 |
| Aly/ref export factor /// aly/ref export factor 2       | <i>Alyref /// alyref2</i> | 1,35391068 | 0,00991729 |
| Cyclin-dependent kinase 1                               | <i>Cdk1</i>               | 1,35375872 | 0,00054365 |
| M-phase phosphoprotein 9                                | <i>Mphosph9</i>           | 1,35375164 | 0,00342175 |
| Riken cdna 9030624j02 gene                              | <i>9030624j02rik</i>      | 1,35363831 | 0,00066198 |
| Rna binding motif protein 8a                            | <i>Rbm8a</i>              | 1,3535044  | 0,00114647 |
| Ubiquinol-cytochrome c reductase hinge protein          | <i>Uqcrh</i>              | 1,35348615 | 0,00229277 |
| Peroxisomal biogenesis factor 16                        | <i>Pex16</i>              | 1,35344964 | 0,00403909 |
| Histone deacetylase 2                                   | <i>Hdac2</i>              | 1,35338565 | 0,00208514 |
| Sec24 related gene family, member c (s. Cerevisiae)     | <i>Sec24c</i>             | 1,35337559 | 0,00121397 |
| Cysteine and histidine rich 1                           | <i>Cyhr1</i>              | 1,35272391 | 0,00115429 |
| Trab domain containing                                  | <i>Trabd</i>              | 1,35261697 | 0,00495352 |
| Thymidine kinase 1                                      | <i>Tk1</i>                | 1,35233501 | 0,00128481 |
| Pyridoxine 5'-phosphate oxidase                         | <i>Pnpo</i>               | 1,35222326 | 0,00383943 |
| Glutaredoxin 2 (thioltransferase)                       | <i>Glrx2</i>              | 1,35190944 | 0,00157516 |
| Slu7 splicing factor homolog (s. Cerevisiae)            | <i>Slu7</i>               | 1,35180518 | 0,00965603 |
| General transcription factor iii a                      | <i>Gtf3a</i>              | 1,35156799 | 0,00683814 |
| Fk506 binding protein 1a                                | <i>Fkbp1a</i>             | 1,35123539 | 0,00202396 |
| Fk506 binding protein 7                                 | <i>Fkbp7</i>              | 1,3511533  | 0,00169772 |
| Fyve, rhogef and ph domain containing 3                 | <i>Fgd3</i>               | 1,35084287 | 0,00893378 |
| Replication factor c (activator 1) 2                    | <i>Rfc2</i>               | 1,35076296 | 0,00077659 |
| Stabilin 1                                              | <i>Stab1</i>              | 1,35076286 | 0,00385116 |
| Tubby-like protein 3                                    | <i>Tulp3</i>              | 1,35065889 | 0,00463605 |
| Polymerase (dna directed), delta 2, regulatory subunit  | <i>Pold2</i>              | 1,3505106  | 0,00231451 |
| Atp-binding cassette, sub-family c (cftr/mrp), member 2 | <i>Abcc2</i>              | 1,35049612 | 0,00310114 |
| Arp3 actin-related protein 3                            | <i>Actr3</i>              | 1,35031179 | 0,00174472 |
| Armado repeat containing 1                              | <i>Armc1</i>              | 1,34931959 | 0,00261972 |
| Sec14-like 1 (s. Cerevisiae)                            | <i>Sec14l1</i>            | 1,34919463 | 0,0039557  |
| Ubiquitin-conjugating enzyme e2t (putative)             | <i>Ube2t</i>              | 1,34910168 | 0,00358    |
| Myoneurin                                               | <i>Mynn</i>               | 1,34910121 | 0,00560969 |
| Protein inhibitor of activated stat 1                   | <i>Pias1</i>              | 1,3490447  | 0,00267759 |
| ErbB receptor feedback inhibitor 1                      | <i>Errfi1</i>             | 1,34883705 | 0,00108107 |
| Mitochondrial ribosomal protein s5                      | <i>Mrps5</i>              | 1,3488024  | 0,00614249 |
| Myotubularin related protein 14                         | <i>Mtmr14</i>             | 1,34837633 | 0,00491227 |
| Vitamin k epoxide reductase complex, subunit 1          | <i>Vkorc1</i>             | 1,34835613 | 0,00099306 |
| Thioredoxin reductase 3                                 | <i>Txnrd3</i>             | 1,34781735 | 0,00291285 |
| Zinc finger protein 87                                  | <i>Zfp87</i>              | 1,34770221 | 0,00325399 |
| Acyl-coenzyme a dehydrogenase family, member 10         | <i>Acad10</i>             | 1,34728184 | 0,00100314 |
| Geminin                                                 | <i>Gmnn</i>               | 1,34720035 | 0,00168454 |

|                                                                                        |                         |            |            |
|----------------------------------------------------------------------------------------|-------------------------|------------|------------|
| Cholinergic receptor, muscarinic 3, cardiac                                            | <i>Chrm3</i>            | 1,34701646 | 0,0004727  |
| Fasciculation and elongation protein zeta 2 (zygin ii)                                 | <i>Fez2</i>             | 1,34654615 | 0,00050245 |
| Sam and sh3 domain containing 1                                                        | <i>Sash1</i>            | 1,34653255 | 0,00335704 |
| K(lysine) acetyltransferase 7                                                          | <i>Kat7</i>             | 1,34641156 | 0,0079804  |
| Male-specific lethal 3 homolog (drosophila)                                            | <i>Msl3</i>             | 1,3459993  | 0,00066855 |
| Ctd (carboxy-terminal domain, rna polymerase ii, polypeptide a) phosphatase, subunit 1 | <i>Ctdp1</i>            | 1,34580966 | 0,00935869 |
| Nth (endonuclease iii)-like 1 (e.coli)                                                 | <i>Nthl1</i>            | 1,34580461 | 0,00112873 |
| Cox assembly mitochondrial protein 2                                                   | <i>Cmc2</i>             | 1,34492314 | 0,00239109 |
| Rab11a, member ras oncogene family                                                     | <i>Rab11a</i>           | 1,3447351  | 0,00796815 |
| Germ cell-less homolog 1 (drosophila)                                                  | <i>Gmcl1</i>            | 1,3442875  | 0,00422609 |
| Vps9 domain containing 1                                                               | <i>Vps9d1</i>           | 1,34412013 | 0,00206024 |
| Mediator complex subunit 22                                                            | <i>Med22</i>            | 1,3438771  | 0,00331579 |
| Nudix (nucleoside diphosphate linked moiety x)-type motif 16                           | <i>Nudt16</i>           | 1,34355991 | 0,00952734 |
| Death associated protein 3                                                             | <i>Dap3</i>             | 1,34343057 | 0,00091545 |
| Transcription factor cp2                                                               | <i>Tfcp2</i>            | 1,34310415 | 0,00238834 |
| Ring finger protein 157                                                                | <i>Rnf157</i>           | 1,3428983  | 0,00317977 |
| Cleavage and polyadenylation specific factor 1                                         | <i>Cpsf1</i>            | 1,34280598 | 0,0030092  |
| Trans-2,3-enoyl-coa reductase                                                          | <i>Tecr</i>             | 1,34275508 | 0,00418089 |
| Nascent polypeptide-associated complex alpha polypeptide                               | <i>Naca</i>             | 1,34256173 | 0,00076395 |
| Huntingtin                                                                             | <i>Htt</i>              | 1,34227253 | 0,00395224 |
| Mitofusin 1                                                                            | <i>Mfn1</i>             | 1,34208324 | 0,00164862 |
| Grpe-like 2, mitochondrial                                                             | <i>Grpel2</i>           | 1,34201422 | 0,00172363 |
| Nitric oxide associated 1                                                              | <i>Noa1</i>             | 1,34150844 | 0,00191845 |
| Mob family member 4, phocein                                                           | <i>Mob4</i>             | 1,34128785 | 0,00880243 |
| Polymerase (dna directed), beta                                                        | <i>Polb</i>             | 1,34127114 | 0,00143088 |
| Lipin 3                                                                                | <i>Lpin3</i>            | 1,34093366 | 0,00425092 |
| Coiled-coil-helix-coiled-coil-helix domain containing 5                                | <i>Chchd5</i>           | 1,34083338 | 0,00619686 |
| Myotubularin related protein 4                                                         | <i>Mtmr4</i>            | 1,34075439 | 0,00079068 |
| Fanconi anemia, complementation group 1                                                | <i>Fancl</i>            | 1,34045421 | 0,00281881 |
| E2f transcription factor 6                                                             | <i>E2f6</i>             | 1,34023989 | 0,00207574 |
| Nucleoporin 43                                                                         | <i>Nup43</i>            | 1,34023074 | 0,00160935 |
| Cysteine rich, dpf motif domain containing 1                                           | <i>Cdpf1</i>            | 1,33969349 | 0,00177085 |
| Patatin-like phospholipase domain containing 2                                         | <i>Pnpla2</i>           | 1,33968449 | 0,00436988 |
| Glucosidase, alpha, acid                                                               | <i>Gaa</i>              | 1,33954259 | 0,00374298 |
| Vang-like 1 (van gogh, drosophila)                                                     | <i>Vangl1</i>           | 1,33929168 | 0,00236001 |
| Solute carrier family 39 (metal ion transporter), member 11                            | <i>Slc39a11</i>         | 1,33899294 | 0,0017669  |
| Ash2 (absent, small, or homeotic)-like (drosophila)                                    | <i>Ash2l</i>            | 1,33895066 | 0,00112471 |
| Predicted gene, 17748 /// peptidyl prolyl isomerase h                                  | <i>Gm17748 /// ppih</i> | 1,33888524 | 0,00291272 |
| Glucosamine (n-acetyl)-6-sulfatase                                                     | <i>Gns</i>              | 1,33851297 | 0,00104274 |
| Dual oxidase maturation factor 1                                                       | <i>Duoxa1</i>           | 1,33846107 | 0,00560969 |
| Profilin 2                                                                             | <i>Pfn2</i>             | 1,33833138 | 0,00553428 |
| Suppressor of cytokine signaling 5                                                     | <i>Socs5</i>            | 1,33825698 | 0,00365674 |

|                                                                              |                 |            |            |
|------------------------------------------------------------------------------|-----------------|------------|------------|
| Haus augmin-like complex, subunit 4                                          | <i>Haus4</i>    | 1,3381848  | 0,00174963 |
| Predicted gene 13152                                                         | <i>Gm13152</i>  | 1,33775971 | 0,00893981 |
| Fatty acid binding protein 5, epidermal                                      | <i>Fabp5</i>    | 1,33751313 | 0,00774416 |
| Loss of heterozygosity, 12, chromosomal region 1 homolog (human)             | <i>Loh12cr1</i> | 1,33598528 | 0,00223573 |
| Major facilitator superfamily domain containing 3                            | <i>Mfsd3</i>    | 1,33586296 | 0,00650951 |
| Solute carrier family 14 (urea transporter), member 1                        | <i>Slc14a1</i>  | 1,33527427 | 0,00096682 |
| Mitochondrial ribosomal protein l35                                          | <i>Mrpl35</i>   | 1,33479738 | 0,00438536 |
| Pdz binding kinase                                                           | <i>Pbk</i>      | 1,33415875 | 0,00327163 |
| Growth factor receptor bound protein 2                                       | <i>Grb2</i>     | 1,33376711 | 0,0007824  |
| Enolase 2, gamma neuronal                                                    | <i>Eno2</i>     | 1,33363235 | 0,0076496  |
| Ras-related c3 botulinum substrate 1                                         | <i>Rac1</i>     | 1,3335692  | 0,00305103 |
| Vacuolar protein sorting 26 homolog a (yeast)                                | <i>Vps26a</i>   | 1,33317146 | 0,00054258 |
| Triosephosphate isomerase 1                                                  | <i>Tpi1</i>     | 1,33231031 | 0,00107379 |
| Eukaryotic translation initiation factor 2b, subunit 4 delta                 | <i>Eif2b4</i>   | 1,33211782 | 0,00545462 |
| Adenosine monophosphate deaminase 3                                          | <i>Ampd3</i>    | 1,33144015 | 0,00336167 |
| Mad2 mitotic arrest deficient-like 1                                         | <i>Mad2l1</i>   | 1,33083298 | 0,00106554 |
| Thyroid hormone receptor alpha                                               | <i>Thra</i>     | 1,33069258 | 0,00742942 |
| Mis18 binding protein 1                                                      | <i>Mis18bp1</i> | 1,3306531  | 0,00268677 |
| Eukaryotic translation initiation factor 4, gamma 2                          | <i>Eif4g2</i>   | 1,33011535 | 0,00253679 |
| Arp10 actin-related protein 10                                               | <i>Actr10</i>   | 1,3300581  | 0,00325893 |
| Microtubule-associated protein 4                                             | <i>Map4</i>     | 1,32987265 | 0,00366439 |
| Sprouty homolog 4 (drosophila)                                               | <i>Spry4</i>    | 1,32987102 | 0,00432788 |
| Adp-ribosylation factor-like 4c                                              | <i>Arl4c</i>    | 1,3297901  | 0,0010052  |
| Fic domain containing                                                        | <i>Ficd</i>     | 1,32976609 | 0,00923632 |
| Solute carrier family 4 (anion exchanger), member 1                          | <i>Slc4a1</i>   | 1,32974785 | 0,00124039 |
| Atp synthase, h+ transporting mitochondrial f1 complex, beta subunit         | <i>Atp5b</i>    | 1,32971081 | 0,00229228 |
| Acireductone dioxygenase 1                                                   | <i>Adi1</i>     | 1,32939115 | 0,00278303 |
| Tripartite motif-containing 62                                               | <i>Trim62</i>   | 1,32871883 | 0,00259503 |
| Zinc finger and btb domain containing 45                                     | <i>Zbtb45</i>   | 1,32842264 | 0,00135598 |
| Cytochrome p450, family 11, subfamily a, polypeptide 1                       | <i>Cyp11a1</i>  | 1,32836438 | 0,00705773 |
| Molybdenum cofactor sulfurase                                                | <i>Mocos</i>    | 1,32831756 | 0,00669456 |
| Translocase of inner mitochondrial membrane 17a                              | <i>Timm17a</i>  | 1,32798196 | 0,00396966 |
| Secernin 2                                                                   | <i>Scrn2</i>    | 1,32792942 | 0,00377677 |
| Small nuclear ribonucleoprotein 27 (u4/u6.u5)                                | <i>Snrnp27</i>  | 1,32769556 | 0,00254443 |
| Er degradation enhancer, mannosidase alpha-like 1                            | <i>Edem1</i>    | 1,32751009 | 0,00061585 |
| Mitochondrial fission regulator 1-like                                       | <i>Mtfr1l</i>   | 1,32720058 | 0,00117801 |
| Lsm14 homolog b (scd6, s. Cerevisiae)                                        | <i>Lsm14b</i>   | 1,32685111 | 0,00228668 |
| Nlr family, apoptosis inhibitory protein 2                                   | <i>Naip2</i>    | 1,32679938 | 0,00299058 |
| Catenin, beta like 1                                                         | <i>Ctnnbl1</i>  | 1,32652003 | 0,00131526 |
| Asp (abnormal spindle)-like, microcephaly associated (drosophila)            | <i>Aspm</i>     | 1,3261432  | 0,00397733 |
| Hydroxy-delta-5-steroid dehydrogenase, 3 beta- and steroid delta-isomerase 7 | <i>Hsd3b7</i>   | 1,32590643 | 0,00084461 |

|                                                                                                                               |                                                      |            |            |
|-------------------------------------------------------------------------------------------------------------------------------|------------------------------------------------------|------------|------------|
| Biphenyl hydrolase-like (serine hydrolase, breast epithelial mucin-associated antigen)                                        | <i>Bphl</i>                                          | 1,32538214 | 0,00591573 |
| Purine rich element binding protein a                                                                                         | <i>Pura</i>                                          | 1,32535293 | 0,00820166 |
| N-acetylneuraminic acid synthase (sialic acid synthase)                                                                       | <i>Nans</i>                                          | 1,32534911 | 0,0034774  |
| Snf8, escrt-ii complex subunit, homolog (s. Cerevisiae)                                                                       | <i>Snf8</i>                                          | 1,32514866 | 0,0041785  |
| Dynactin 3                                                                                                                    | <i>Dctn3</i>                                         | 1,32506994 | 0,00370257 |
| H2a histone family, member v                                                                                                  | <i>H2afv</i>                                         | 1,32492264 | 0,0018271  |
| Wingless-type mmtv integration site family, member 5a                                                                         | <i>Wnt5a</i>                                         | 1,32488887 | 0,0099207  |
| Tubulin, gamma complex associated protein 4                                                                                   | <i>Tubgcp4</i>                                       | 1,3247779  | 0,0018366  |
| Aurora kinase a                                                                                                               | <i>Aurka</i>                                         | 1,32441759 | 0,00935397 |
| Speg complex locus                                                                                                            | <i>Speg</i>                                          | 1,32395374 | 0,00985276 |
| Cytochrome c oxidase subunit viia 2                                                                                           | <i>Cox7a2</i>                                        | 1,32378791 | 0,00382598 |
| N-6 adenine-specific dna methyltransferase 2 (putative)                                                                       | <i>N6amt2</i>                                        | 1,32347908 | 0,00801956 |
| Nadh dehydrogenase (ubiquinone) fe-s protein 3                                                                                | <i>Ndufs3</i>                                        | 1,32333657 | 0,0041785  |
| Ath1, acid trehalase-like 1 (yeast)                                                                                           | <i>Ath11</i>                                         | 1,32258445 | 0,00969983 |
| Glutamate-cysteine ligase, modifier subunit                                                                                   | <i>Gclm</i>                                          | 1,32189372 | 0,00195219 |
| Serum response factor binding protein 1                                                                                       | <i>Srfbp1</i>                                        | 1,32185855 | 0,00231561 |
| Leukocyte receptor cluster (lrc) member 1                                                                                     | <i>Leng1</i>                                         | 1,32164396 | 0,00717368 |
| Abhydrolase domain containing 16a                                                                                             | <i>Abhd16a</i>                                       | 1,3212273  | 0,00349414 |
| Spastic paraplegia 20, spartin (troyer syndrome) homolog (human)                                                              | <i>Spg20</i>                                         | 1,32117029 | 0,00446874 |
| Mpv17 mitochondrial inner membrane protein                                                                                    | <i>Mpv17</i>                                         | 1,32113946 | 0,00367508 |
| Acetyl-coenzyme a acetyltransferase 2                                                                                         | <i>Acat2</i>                                         | 1,32051603 | 0,00107596 |
| Sec1 family domain containing 1                                                                                               | <i>Scfd1</i>                                         | 1,31978078 | 0,00237424 |
| Sec61 alpha 1 subunit (s. Cerevisiae)                                                                                         | <i>Sec61a1</i>                                       | 1,31970046 | 0,00416432 |
| Electron transferring flavoprotein, beta polypeptide                                                                          | <i>Etfb</i>                                          | 1,31955255 | 0,00316737 |
| Atx1 (antioxidant protein 1) homolog 1 (yeast)                                                                                | <i>Atox1</i>                                         | 1,31936529 | 0,00467958 |
| Leukotriene c4 synthase                                                                                                       | <i>Ltc4s</i>                                         | 1,31895046 | 0,0063076  |
| Suppressor of defective silencing 3 homolog (s. Cerevisiae)                                                                   | <i>Suds3</i>                                         | 1,31866405 | 0,00234391 |
| Tar (hiv) rna binding protein 2                                                                                               | <i>Tarbp2</i>                                        | 1,31843558 | 0,00264826 |
| Atp citrate lyase                                                                                                             | <i>Acly</i>                                          | 1,31837211 | 0,00541149 |
| Ras p21 protein activator 4                                                                                                   | <i>Rasa4</i>                                         | 1,31823741 | 0,00414834 |
| Riken cdna 5031439g07 gene                                                                                                    | <i>5031439g07rik</i>                                 | 1,31795033 | 0,0028693  |
| Biotinidase                                                                                                                   | <i>Btd</i>                                           | 1,31787007 | 0,00464004 |
| Histone deacetylase 6                                                                                                         | <i>Hdac6</i>                                         | 1,31778492 | 0,00224586 |
| Schlafen 3                                                                                                                    | <i>Slfn3</i>                                         | 1,31754778 | 0,00997966 |
| Coiled-coil-helix-coiled-coil-helix domain containing 2<br>/// predicted gene 13202 /// zinc finger, bed-type<br>containing 5 | <i>Chchd2</i> /// <i>gm13202</i><br>/// <i>zbed5</i> | 1,31717906 | 0,00148674 |
| Lysosomal-associated protein transmembrane 4a                                                                                 | <i>Laptm4a</i>                                       | 1,31646317 | 0,00309332 |
| Cdc28 protein kinase regulatory subunit 2                                                                                     | <i>Cks2</i>                                          | 1,31624628 | 0,00247621 |
| Ww domain containing adaptor with coiled-coil                                                                                 | <i>Wac</i>                                           | 1,31610842 | 0,00700356 |
| Glucose-6-phosphate dehydrogenase 2 /// glucose-6-phosphate dehydrogenase x-linked                                            | <i>G6pd2</i> /// <i>g6pdx</i>                        | 1,31610015 | 0,00891248 |
| Splicing factor 3b, subunit 6                                                                                                 | <i>Sf3b6</i>                                         | 1,31599757 | 0,00373324 |



|                                                                               |                          |            |            |
|-------------------------------------------------------------------------------|--------------------------|------------|------------|
| Family with sequence similarity 21                                            | <i>Fam21</i>             | 1,31597099 | 0,00625833 |
| Proteasome (prosome, macropain) subunit, alpha type 1                         | <i>Psm1</i>              | 1,31589089 | 0,00383738 |
| Solute carrier family 15, member 4                                            | <i>Slc15a4</i>           | 1,31571466 | 0,00525411 |
| Paxip1 associated glutamate rich protein 1a                                   | <i>Pagr1a</i>            | 1,31560683 | 0,00833993 |
| Small edrk-rich factor 2                                                      | <i>Serf2</i>             | 1,31543784 | 0,00516913 |
| Sodium channel, voltage-gated, type i, alpha                                  | <i>Scn1a</i>             | 1,31531297 | 0,00176433 |
| Sh3 binding domain protein 5 like                                             | <i>Sh3bp5l</i>           | 1,31519177 | 0,00255329 |
| Biogenesis of lysosomal organelles complex-1, subunit 6, pallidin             | <i>Bloc1s6</i>           | 1,3149992  | 0,00322294 |
| Developmentally regulated gtp binding protein 1                               | <i>Drg1</i>              | 1,31485765 | 0,00241931 |
| Calcium-binding tyrosine-(y)-phosphorylation regulated (fibrousheathin 2)     | <i>Cabyr</i>             | 1,31416494 | 0,0043725  |
| Zinc finger with krab and scan domains 5                                      | <i>Zkscan5</i>           | 1,31258515 | 0,0050304  |
| Cystatin b                                                                    | <i>Cstb</i>              | 1,3124178  | 0,00322944 |
| Lipin 1                                                                       | <i>Lpin1</i>             | 1,31199226 | 0,00371082 |
| Nephronophthisis 1 (juvenile) homolog (human)                                 | <i>Nphp1</i>             | 1,31189797 | 0,00626874 |
| 3-hydroxyisobutyrate dehydrogenase                                            | <i>Hibadh</i>            | 1,31146759 | 0,00784359 |
| Mrs2 magnesium homeostasis factor homolog (s. Cerevisiae)                     | <i>Mrs2</i>              | 1,31143055 | 0,0070202  |
| Amyloid beta (a4) precursor protein-binding, family b, member 1               | <i>Apb1</i>              | 1,31113909 | 0,00362909 |
| Acyl-coenzyme a oxidase 1, palmitoyl                                          | <i>Acox1</i>             | 1,31088211 | 0,00104335 |
| Occludin/ell domain containing 1                                              | <i>Ocl1</i>              | 1,31064261 | 0,00644585 |
| Protein phosphatase 1, regulatory subunit 21                                  | <i>Ppp1r21</i>           | 1,30984588 | 0,00308282 |
| Polymerase (dna-directed), delta interacting protein 2                        | <i>Poldip2</i>           | 1,30954683 | 0,00350128 |
| Ubiquitin specific peptidase 9, x chromosome                                  | <i>Usp9x</i>             | 1,30901735 | 0,00660122 |
| Keratin 36                                                                    | <i>Krt36</i>             | 1,30892424 | 0,00387783 |
| Pten induced putative kinase 1                                                | <i>Pink1</i>             | 1,30856876 | 0,00255582 |
| Heme binding protein 1                                                        | <i>Hebp1</i>             | 1,30835527 | 0,00288795 |
| Catenin (cadherin associated protein), alpha 1                                | <i>Ctnna1</i>            | 1,30801684 | 0,00142882 |
| Microsomal triglyceride transfer protein                                      | <i>Mttp</i>              | 1,30774926 | 0,00449769 |
| Serine/threonine kinase 11                                                    | <i>Stk11</i>             | 1,30749815 | 0,00431548 |
| Atp synthase, h+ transporting, mitochondrial f0 complex, subunit b1           | <i>Atp5f1</i>            | 1,30726702 | 0,00179895 |
| Histocompatibility 2, t region locus 10 ///                                   | <i>H2-t10 ///</i>        | 1,30672539 | 0,00359506 |
| histocompatibility 2, t region locus 22 ///                                   | <i>h2-t22 ///</i>        |            |            |
| histocompatibility 2, t region locus 9                                        | <i>h2-t9</i>             |            |            |
| Histone deacetylase 1                                                         | <i>Hdac1</i>             | 1,3065813  | 0,00638011 |
| Fragile x mental retardation gene 1, autosomal homolog                        | <i>Fxr1</i>              | 1,30643668 | 0,00483075 |
| Ras-like without caax 1                                                       | <i>Rit1</i>              | 1,30520559 | 0,00199961 |
| Engulfment and cell motility 2                                                | <i>Elmo2</i>             | 1,30470601 | 0,0027479  |
| Ceroid lipofuscinosis, neuronal 3, juvenile (batten, spielmeyer-vogt disease) | <i>Cln3</i>              | 1,30450872 | 0,00585036 |
| Riken cDNA 1810037i17 gene ///                                                | <i>1810037i17rik ///</i> | 1,30420003 | 0,00672941 |
| predicted gene 2036                                                           | <i>gm2036</i>            |            |            |
| Syntaxin binding protein 1                                                    | <i>Stxbp1</i>            | 1,30391858 | 0,00982635 |
| Denn/madd domain containing 5a                                                | <i>Dennd5a</i>           | 1,30385112 | 0,0010875  |

|                                                                                                                                       |                                                              |            |            |
|---------------------------------------------------------------------------------------------------------------------------------------|--------------------------------------------------------------|------------|------------|
| O-sialoglycoprotein endopeptidase                                                                                                     | <i>Osgep</i>                                                 | 1,30324105 | 0,00605046 |
| Ctr9, paf1/rna polymerase ii complex component, homolog (s. Cerevisiae)                                                               | <i>Ctr9</i>                                                  | 1,30320091 | 0,00262179 |
| Nima (never in mitosis gene a)-related expressed kinase 2                                                                             | <i>Nek2</i>                                                  | 1,30302274 | 0,0068225  |
| Mitochondrial translation optimization 1 homolog (s. Cerevisiae)                                                                      | <i>Mto1</i>                                                  | 1,30301262 | 0,00331727 |
| Wnk lysine deficient protein kinase 1                                                                                                 | <i>Wnk1</i>                                                  | 1,30257723 | 0,00123371 |
| Aspartyl aminopeptidase                                                                                                               | <i>Dnpep</i>                                                 | 1,30201121 | 0,00170612 |
| Adenylosuccinate lyase                                                                                                                | <i>Adsl</i>                                                  | 1,30196918 | 0,0025513  |
| Transmembrane protein 184b                                                                                                            | <i>Tmem184b</i>                                              | 1,30190849 | 0,00154442 |
| Casein kinase 1, alpha 1                                                                                                              | <i>Csnk1a1</i>                                               | 1,30169828 | 0,00328754 |
| Microphthalmia-associated transcription factor                                                                                        | <i>Mitf</i>                                                  | 1,30152936 | 0,00536898 |
| Replication protein a3                                                                                                                | <i>Rpa3</i>                                                  | 1,30122751 | 0,00782985 |
| Mitochondrial ribosomal protein l15                                                                                                   | <i>Mrpl15</i>                                                | 1,30073001 | 0,00155094 |
| Predicted gene 10015 /// predicted gene 10145 /// predicted gene 10705 /// predicted gene 5858 /// ubiquitin-conjugating enzyme e2l 3 | <i>Gm10015 /// gm10145 /// gm10705 /// gm5858 /// ube2l3</i> | 1,30013769 | 0,00367182 |
| Asparagine-linked glycosylation 5 (dolichyl-phosphate beta-glucosyltransferase)                                                       | <i>Alg5</i>                                                  | 1,30009471 | 0,00149482 |
| Cdna sequence bc017643                                                                                                                | <i>Bc017643</i>                                              | 1,29937266 | 0,00391273 |
| Zinc finger rna binding protein 2                                                                                                     | <i>Zfr2</i>                                                  | 1,29902417 | 0,00958836 |
| Schlafen 8                                                                                                                            | <i>Slfn8</i>                                                 | 1,29897085 | 0,00884021 |
| Leucyl-trna synthetase                                                                                                                | <i>Lars</i>                                                  | 1,29879136 | 0,00242934 |
| Capping protein (actin filament) muscle z-line, alpha 1                                                                               | <i>Capza1</i>                                                | 1,29874869 | 0,00672285 |
| Clathrin, light polypeptide (lca)                                                                                                     | <i>Clta</i>                                                  | 1,29869015 | 0,00262579 |
| Zinc finger ccch type containing 10                                                                                                   | <i>Zc3h10</i>                                                | 1,29859437 | 0,00476996 |
| Solute carrier family 35, member f6                                                                                                   | <i>Slc35f6</i>                                               | 1,29846429 | 0,00530349 |
| Ribosomal protein s14                                                                                                                 | <i>Rps14</i>                                                 | 1,29820252 | 0,00208514 |
| Rna polymerase ii associated protein 1                                                                                                | <i>Rpap1</i>                                                 | 1,29819001 | 0,00867657 |
| Adp-ribosylation factor-like 16                                                                                                       | <i>Arl16</i>                                                 | 1,29816237 | 0,00279972 |
| Keratin 16                                                                                                                            | <i>Krt16</i>                                                 | 1,29799848 | 0,00290619 |
| Synergyn, gamma                                                                                                                       | <i>Synrg</i>                                                 | 1,29758621 | 0,00749904 |
| Hepatoma-derived growth factor, related protein 2                                                                                     | <i>Hdgfrp2</i>                                               | 1,29744373 | 0,00232634 |
| Mitotic spindle organizing protein 2                                                                                                  | <i>Mzt2</i>                                                  | 1,29723414 | 0,00469752 |
| Trna splicing endonuclease 15 homolog (s. Cerevisiae)                                                                                 | <i>Tsen15</i>                                                | 1,29703491 | 0,00552176 |
| Rfad1, flavin adenine dinucleotide synthetase, homolog (yeast)                                                                        | <i>Flad1</i>                                                 | 1,29688905 | 0,00461472 |
| Pescadillo homolog 1, containing brct domain (zebrafish)                                                                              | <i>Pes1</i>                                                  | 1,29570651 | 0,00434655 |
| Sprouty protein with evh-1 domain 1, related sequence                                                                                 | <i>Spred1</i>                                                | 1,29564167 | 0,00276981 |
| Tmem9 domain family, member b                                                                                                         | <i>Tmem9b</i>                                                | 1,29557102 | 0,00452933 |
| Regulation of nuclear pre-mrna domain containing 1b                                                                                   | <i>Rprd1b</i>                                                | 1,29526529 | 0,00730816 |
| Proteasome (prosome, macropain) 26s subunit, atpase 3, interacting protein                                                            | <i>Psmc3ip</i>                                               | 1,29524595 | 0,0018758  |
| Solute carrier family 35, member e4                                                                                                   | <i>Slc35e4</i>                                               | 1,29487357 | 0,00899634 |
| Apurinic/aprimidinic endonuclease 2                                                                                                   | <i>Apex2</i>                                                 | 1,29473794 | 0,00674245 |

|                                                                        |                           |            |            |
|------------------------------------------------------------------------|---------------------------|------------|------------|
| Riken cdna 4931406c07 gene                                             | <i>4931406c07rik</i>      | 1,29461402 | 0,0036704  |
| Proteasome (prosome, macropain) subunit, alpha type 2                  | <i>Psm2</i>               | 1,29400792 | 0,0037987  |
| Er degradation enhancer, mannosidase alpha-like 2                      | <i>Edem2</i>              | 1,29391975 | 0,00696527 |
| Mitochondrial ribosomal protein s24                                    | <i>Mrps24</i>             | 1,29388735 | 0,0046047  |
| Adp-ribosylation factor-like 5a                                        | <i>Arl5a</i>              | 1,29348589 | 0,00198337 |
| Filamin c, gamma                                                       | <i>Flnc</i>               | 1,29341745 | 0,00901275 |
| Succinate-coa ligase, gdp-forming, alpha subunit                       | <i>Suclg1</i>             | 1,29278964 | 0,00206522 |
| Defender against cell death 1                                          | <i>Dad1</i>               | 1,2926727  | 0,00782985 |
| Pleckstrin homology-like domain, family b, member 1                    | <i>Phldb1</i>             | 1,29247009 | 0,00946706 |
| Ornithine decarboxylase antizyme 1                                     | <i>Oaz1</i>               | 1,29238955 | 0,00362433 |
| Vasoactive intestinal polypeptide                                      | <i>Vip</i>                | 1,29202707 | 0,00382322 |
| Tubulin, alpha 1b pseudogene /// tubulin, alpha 1b                     | <i>Gm5620 /// tuba1b</i>  | 1,2917548  | 0,00138688 |
| Chaperonin containing tcp1, subunit 3 (gamma)                          | <i>Cct3</i>               | 1,29156964 | 0,00819458 |
| Bud13 homolog (yeast)                                                  | <i>Bud13</i>              | 1,29127096 | 0,0068107  |
| Kinesin family member 22                                               | <i>Kif22</i>              | 1,29122531 | 0,00399587 |
| Tax1 (human t cell leukemia virus type i) binding protein 3            | <i>Tax1bp3</i>            | 1,29086865 | 0,0024029  |
| Transmembrane protein 63a                                              | <i>Tmem63a</i>            | 1,29070607 | 0,00845245 |
| Platelet-activating factor acetylhydrolase 2                           | <i>Pafah2</i>             | 1,2906827  | 0,00299673 |
| Autophagy related 3                                                    | <i>Atg3</i>               | 1,29064038 | 0,00533141 |
| Cytochrome p450, family 2, subfamily b, polypeptide 13                 | <i>Cyp2b13</i>            | 1,29009859 | 0,00621996 |
| Actin related protein 2/3 complex, subunit 3                           | <i>Arpc3</i>              | 1,28989335 | 0,00770516 |
| D-2-hydroxyglutarate dehydrogenase                                     | <i>D2hgdh</i>             | 1,28936055 | 0,00762973 |
| Predicted gene, 21949 /// schwannomin interacting protein 1            | <i>Gm21949 /// schip1</i> | 1,28910962 | 0,00467343 |
| Syntaxin 8                                                             | <i>Stx8</i>               | 1,28895663 | 0,00699057 |
| Actin, beta                                                            | <i>Actb</i>               | 1,28890036 | 0,00286966 |
| Endothelin converting enzyme 2                                         | <i>Ece2</i>               | 1,28883338 | 0,0063824  |
| Peroxisome proliferative activated receptor, gamma, coactivator 1 beta | <i>Ppargc1b</i>           | 1,28848282 | 0,0082213  |
| Taspase, threonine aspartase 1                                         | <i>Tasp1</i>              | 1,28808802 | 0,00998206 |
| Williams beuren syndrome chromosome region 22                          | <i>Wbscr22</i>            | 1,28802507 | 0,00630526 |
| Angiogenic factor with g patch and fha domains 1                       | <i>Aggf1</i>              | 1,2872336  | 0,00283042 |
| Proliferating cell nuclear antigen                                     | <i>Pcna</i>               | 1,28686492 | 0,00405245 |
| Glucosidase beta 2                                                     | <i>Gba2</i>               | 1,28662766 | 0,00884436 |
| Myc binding protein 2                                                  | <i>Mycbp2</i>             | 1,28660275 | 0,00350128 |
| Serine (or cysteine) peptidase inhibitor, clade b, member 9b           | <i>Serpinb9b</i>          | 1,28654588 | 0,00977186 |
| Nuclear distribution gene c homolog (aspergillus)                      | <i>Nudc</i>               | 1,28654518 | 0,00483942 |
| Acyl-coenzyme a dehydrogenase, very long chain                         | <i>Acadvl</i>             | 1,28617336 | 0,00650951 |
| Stromal cell-derived factor 2-like 1                                   | <i>Sdf2l1</i>             | 1,28597647 | 0,00288795 |
| Trans-golgi network vesicle protein 23a                                | <i>Top23a</i>             | 1,28565622 | 0,00358255 |
| Ornithine decarboxylase, structural 1                                  | <i>Odc1</i>               | 1,28472038 | 0,00675055 |
| Wd repeat domain 45b                                                   | <i>Wdr45b</i>             | 1,28401026 | 0,00259445 |
| F-box protein 28                                                       | <i>Fbxo28</i>             | 1,28382056 | 0,00680542 |

|                                                                                                                     |                                                                  |            |            |
|---------------------------------------------------------------------------------------------------------------------|------------------------------------------------------------------|------------|------------|
| Intraflagellar transport 20                                                                                         | <i>Ift20</i>                                                     | 1,28361606 | 0,00311936 |
| Single-stranded dna binding protein 1                                                                               | <i>Ssbp1</i>                                                     | 1,28351194 | 0,00238499 |
| Rab7, member ras oncogene family                                                                                    | <i>Rab7</i>                                                      | 1,2834163  | 0,0030057  |
| Protein kinase, x-linked                                                                                            | <i>Prkx</i>                                                      | 1,28202628 | 0,00958648 |
| Thymidylate synthase /// thymidylate synthase, pseudogene                                                           | <i>Tyms</i> /// <i>tyms-ps</i>                                   | 1,28114555 | 0,00188481 |
| Predicted gene 4736 /// predicted gene 8882 /// proline-rich protein bstni subfamily 1 /// proline-rich protein mp5 | <i>Gm4736</i> /// <i>gm8882</i> /// <i>prb1</i> /// <i>prmp5</i> | 1,28097284 | 0,0045084  |
| Centrosomal protein 89                                                                                              | <i>Cep89</i>                                                     | 1,28080302 | 0,00835379 |
| Sphingosine phosphate lyase 1                                                                                       | <i>Sgpl1</i>                                                     | 1,27959892 | 0,00993499 |
| Daz associated protein 1                                                                                            | <i>Dazap1</i>                                                    | 1,27944349 | 0,00989513 |
| Nad(p)h dehydrogenase, quinone 2                                                                                    | <i>Nqo2</i>                                                      | 1,27793797 | 0,00744285 |
| Helicase with zinc finger domain                                                                                    | <i>Helz</i>                                                      | 1,27740566 | 0,00564038 |
| Arp8 actin-related protein 8                                                                                        | <i>Actr8</i>                                                     | 1,27708016 | 0,00535282 |
| Protein (peptidyl-prolyl cis/trans isomerase) nima-interacting 1                                                    | <i>Pin1</i>                                                      | 1,27676216 | 0,00518314 |
| Wap four-disulfide core domain 5                                                                                    | <i>Wfdc5</i>                                                     | 1,27646909 | 0,00564363 |
| Fucosidase, alpha-l- 2, plasma                                                                                      | <i>Fuca2</i>                                                     | 1,27617222 | 0,00810042 |
| Beta-site app cleaving enzyme 1                                                                                     | <i>Bace1</i>                                                     | 1,27580426 | 0,00617449 |
| Trna splicing endonuclease 34 homolog (s. Cerevisiae)                                                               | <i>Tsen34</i>                                                    | 1,27566232 | 0,00217352 |
| Vasohibin 2                                                                                                         | <i>Vash2</i>                                                     | 1,27538835 | 0,00339103 |
| Coenzyme q4 homolog (yeast)                                                                                         | <i>Coq4</i>                                                      | 1,2745957  | 0,00399587 |
| Microspherule protein 1                                                                                             | <i>Mcrs1</i>                                                     | 1,27448686 | 0,00207906 |
| Brca1/brca2-containing complex, subunit 3                                                                           | <i>Brcc3</i>                                                     | 1,27445007 | 0,00377272 |
| Small nuclear ribonucleoprotein 70 (u1)                                                                             | <i>Snrnp70</i>                                                   | 1,27403077 | 0,0034284  |
| Platelet-activating factor acetylhydrolase, isoform 1b, subunit 1                                                   | <i>Pafah1b1</i>                                                  | 1,27393417 | 0,00540161 |
| F-box and wd-40 domain protein 2                                                                                    | <i>Fbxw2</i>                                                     | 1,27370265 | 0,00244948 |
| Cytoplasmic polyadenylation element binding protein 3                                                               | <i>Cpeb3</i>                                                     | 1,27315115 | 0,00517764 |
| Gelsolin                                                                                                            | <i>Gsn</i>                                                       | 1,27187326 | 0,00299673 |
| Neuroguidin, eif4e binding protein                                                                                  | <i>Ngdn</i>                                                      | 1,27184755 | 0,00464988 |
| Kinesin family member 1c                                                                                            | <i>Kif1c</i>                                                     | 1,27170433 | 0,00538098 |
| Er membrane protein complex subunit 2                                                                               | <i>Emc2</i>                                                      | 1,27134356 | 0,00328571 |
| Inositol polyphosphate phosphatase-like 1                                                                           | <i>Inpp1</i>                                                     | 1,27123684 | 0,00950279 |
| Kinesin family member 1b                                                                                            | <i>Kif1b</i>                                                     | 1,27116951 | 0,00383471 |
| Dynein, axonemal, light chain 4                                                                                     | <i>Dnal4</i>                                                     | 1,27050151 | 0,00856643 |
| N-deacetylase/n-sulfotransferase (heparan glucosaminy) 2                                                            | <i>Ndst2</i>                                                     | 1,2693463  | 0,00469859 |
| Phosphatidylinositol glycan anchor biosynthesis, class s                                                            | <i>Pigs</i>                                                      | 1,26876717 | 0,00883188 |
| Cdk5 regulatory subunit associated protein 3                                                                        | <i>Cdk5rap3</i>                                                  | 1,26786495 | 0,00229277 |
| Predicted pseudogene 9769 /// prostaglandin e synthase 3 (cytosolic)                                                | <i>Gm9769</i> /// <i>ptges3</i>                                  | 1,26778766 | 0,00302228 |
| Sap domain containing ribonucleoprotein                                                                             | <i>Sarnp</i>                                                     | 1,26647548 | 0,00831015 |
| Rest corepressor 3                                                                                                  | <i>Rcor3</i>                                                     | 1,2659788  | 0,00854535 |
| Carbamoyl-phosphate synthetase 2, aspartate transcarbamylase, and dihydroorotase                                    | <i>Cad</i>                                                       | 1,26477473 | 0,00640146 |

|                                                                                                                                                                                                       |                                                                                         |            |            |
|-------------------------------------------------------------------------------------------------------------------------------------------------------------------------------------------------------|-----------------------------------------------------------------------------------------|------------|------------|
| Cysteine sulfinic acid decarboxylase                                                                                                                                                                  | <i>Csad</i>                                                                             | 1,26458218 | 0,00793139 |
| Cdna sequence bc023829                                                                                                                                                                                | <i>Bc023829</i>                                                                         | 1,26456405 | 0,0038582  |
| Tel2, telomere maintenance 2, homolog (s. Cerevisiae)                                                                                                                                                 | <i>Telo2</i>                                                                            | 1,26396037 | 0,00881119 |
| Nudix (nucleoside diphosphate linked moiety x)-type motif 1                                                                                                                                           | <i>Nudt1</i>                                                                            | 1,26369474 | 0,0058462  |
| Basic transcription factor 3                                                                                                                                                                          | <i>Btf3</i>                                                                             | 1,26329236 | 0,00255833 |
| S100 calcium binding protein a6 (calcyclin)                                                                                                                                                           | <i>S100a6</i>                                                                           | 1,26321971 | 0,0026829  |
| Serine/threonine kinase 40                                                                                                                                                                            | <i>Stk40</i>                                                                            | 1,26309723 | 0,00565768 |
| Atp synthase, h+ transporting, mitochondrial f0 complex, subunit c3 (subunit 9)                                                                                                                       | <i>Atp5g3</i>                                                                           | 1,26236543 | 0,0027436  |
| Dynein light chain roadblock-type 1                                                                                                                                                                   | <i>Dynlrb1</i>                                                                          | 1,26189517 | 0,00587783 |
| Predicted gene 8539 /// zinc finger and btb domain containing 8 opposite strand                                                                                                                       | <i>Gm8539 /// zbtb8os</i>                                                               | 1,26120502 | 0,00838107 |
| Melanoma inhibitory activity 3                                                                                                                                                                        | <i>Mia3</i>                                                                             | 1,26061918 | 0,00639777 |
| Suppression of tumorigenicity 13                                                                                                                                                                      | <i>St13</i>                                                                             | 1,26045623 | 0,00644837 |
| Annexin a2                                                                                                                                                                                            | <i>Anxa2</i>                                                                            | 1,26001883 | 0,00257891 |
| Membrane-bound transcription factor peptidase, site 1                                                                                                                                                 | <i>Mbtps1</i>                                                                           | 1,25867515 | 0,00362909 |
| Mitochondrial ribosomal protein s36                                                                                                                                                                   | <i>Mrps36</i>                                                                           | 1,2583465  | 0,00255816 |
| Acyl-coa synthetase family member 3                                                                                                                                                                   | <i>Acsf3</i>                                                                            | 1,25805845 | 0,0085295  |
| Canopy 2 homolog (zebrafish)                                                                                                                                                                          | <i>Cnpy2</i>                                                                            | 1,2568544  | 0,00586918 |
| Tubulin folding cofactor b                                                                                                                                                                            | <i>Tbcb</i>                                                                             | 1,25579825 | 0,00689876 |
| Centrin 1                                                                                                                                                                                             | <i>Cetn1</i>                                                                            | 1,2554023  | 0,00952001 |
| Solute carrier family 25 (mitochondrial carrier, phosphate carrier), member 25                                                                                                                        | <i>Slc25a25</i>                                                                         | 1,25447048 | 0,00631358 |
| Protein-tyrosine sulfotransferase 1                                                                                                                                                                   | <i>Tpst1</i>                                                                            | 1,25446673 | 0,00331596 |
| Zinc finger, dhhc domain containing 4                                                                                                                                                                 | <i>Zdhhc4</i>                                                                           | 1,25357801 | 0,00568704 |
| Beta-transducin repeat containing protein                                                                                                                                                             | <i>Btrc</i>                                                                             | 1,25351144 | 0,00641687 |
| Hydroxysteroid (17-beta) dehydrogenase 2                                                                                                                                                              | <i>Hsd17b2</i>                                                                          | 1,25344534 | 0,00703335 |
| Thioredoxin 2                                                                                                                                                                                         | <i>Txn2</i>                                                                             | 1,25314758 | 0,00503083 |
| Hydroxymethylbilane synthase                                                                                                                                                                          | <i>Hmbs</i>                                                                             | 1,25226861 | 0,00545858 |
| Phosphomannomutase 1                                                                                                                                                                                  | <i>Pmm1</i>                                                                             | 1,25208302 | 0,00794215 |
| Succinate dehydrogenase complex, subunit a, flavoprotein (fp)                                                                                                                                         | <i>Sdha</i>                                                                             | 1,25093501 | 0,00957156 |
| Ecdysoneless homolog (drosophila)                                                                                                                                                                     | <i>Ecd</i>                                                                              | 1,25028745 | 0,00867205 |
| Predicted gene 10362 /// 60s ribosomal protein l17-like /// 60s ribosomal protein l17-like /// ribosomal protein l17 /// ribosomal protein l17, pseudogene 10 /// ribosomal protein l17, pseudogene 9 | <i>Gm10362 /// loc101056140 /// loc102641612 /// rpl17 /// rpl17-ps10 /// rpl17-ps9</i> | 1,25024224 | 0,00294667 |
| Proteasome (prosome, macropain) 26s subunit, non-atpase, 13                                                                                                                                           | <i>Psm13</i>                                                                            | 1,25019884 | 0,0068626  |
| Taf12 rna polymerase ii, tata box binding protein (tbp)-associated factor                                                                                                                             | <i>Taf12</i>                                                                            | 1,24933721 | 0,00624151 |
| Coatomer protein complex subunit alpha                                                                                                                                                                | <i>Copa</i>                                                                             | 1,24918236 | 0,00545462 |
| Solute carrier family 44, member 1                                                                                                                                                                    | <i>Slc44a1</i>                                                                          | 1,24802655 | 0,00980672 |
| Hydroxyacyl-coenzyme a dehydrogenase                                                                                                                                                                  | <i>Hadh</i>                                                                             | 1,24693397 | 0,00654375 |
| Dnaj (hsp40) homolog, subfamily a, member 1                                                                                                                                                           | <i>Dnaja1</i>                                                                           | 1,24644766 | 0,00430296 |
| Glial cell line derived neurotrophic factor                                                                                                                                                           | <i>Gdnf</i>                                                                             | 1,24642011 | 0,00498804 |

|                                                                                                                        |                                |            |            |
|------------------------------------------------------------------------------------------------------------------------|--------------------------------|------------|------------|
| Membrane associated guanylate kinase, ww and pdz domain containing 1                                                   | <i>Magi1</i>                   | 1,24618535 | 0,00739598 |
| Mitochondrial amidoxime reducing component 2                                                                           | <i>lil.02</i>                  | 1,24594104 | 0,00348955 |
| Dynein cytoplasmic 1 intermediate chain 2                                                                              | <i>Dync1i2</i>                 | 1,24564047 | 0,0039557  |
| Poly(rc) binding protein 2                                                                                             | <i>Pcbp2</i>                   | 1,2453972  | 0,00437    |
| --- /// heat shock protein 1 (chaperonin 10), pseudogene 2                                                             | <i>Hspe1-ps2 /// hspe1-ps2</i> | 1,2450838  | 0,00588062 |
| Intraflagellar transport 140                                                                                           | <i>Ift140</i>                  | 1,24392195 | 0,00544694 |
| 3-hydroxy-3-methylglutaryl-coenzyme a synthase 1                                                                       | <i>Hmgcs1</i>                  | 1,24330699 | 0,00851544 |
| Htra serine peptidase 1                                                                                                | <i>Htra1</i>                   | 1,24177985 | 0,00303318 |
| Uncharacterized loc102634352 /// snf2-related crebbp activator protein                                                 | <i>Loc102634352 /// srcap</i>  | 1,23932911 | 0,00926729 |
| Acyl-coa thioesterase 8                                                                                                | <i>Acot8</i>                   | 1,23856928 | 0,00503304 |
| Riken cdna c330007p06 gene                                                                                             | <i>C330007p06rik</i>           | 1,23816719 | 0,00952343 |
| Apolipoprotein a-i binding protein                                                                                     | <i>Apoa1bp</i>                 | 1,23614313 | 0,00494214 |
| Phosphatidylethanolamine binding protein 1                                                                             | <i>Pebp1</i>                   | 1,23563031 | 0,0043013  |
| Negative elongation factor complex member b, cobra1                                                                    | <i>Nelfb</i>                   | 1,23518063 | 0,00850784 |
| Uridine-cytidine kinase 1-like 1                                                                                       | <i>Uckl1</i>                   | 1,23516234 | 0,00826859 |
| Golgi to er traffic protein 4 homolog (s. Cerevisiae)                                                                  | <i>Get4</i>                    | 1,23464342 | 0,0082723  |
| A kinase (prka) interacting protein 1                                                                                  | <i>Akip1</i>                   | 1,23281635 | 0,00809443 |
| Proteasome (prosome, macropain) activator subunit 2 (pa28 beta) /// protease (prosome, macropain) activator subunit 2b | <i>Psme2 /// psme2b</i>        | 1,23166236 | 0,00927153 |
| Cdgsh iron sulfur domain 1                                                                                             | <i>Cisd1</i>                   | 1,23091086 | 0,00984893 |
| Par-6 family cell polarity regulator gamma                                                                             | <i>Pard6g</i>                  | 1,2302928  | 0,00994021 |
| Valosin containing protein                                                                                             | <i>Vcp</i>                     | 1,22954042 | 0,00550564 |
| Amme chromosomal region gene 1-like                                                                                    | <i>Ammecr1l</i>                | 1,22847525 | 0,00695992 |
| Transmembrane protein 41b                                                                                              | <i>Tmem41b</i>                 | 1,22837525 | 0,00921647 |
| Polypyrimidine tract binding protein 1                                                                                 | <i>Ptbp1</i>                   | 1,22761474 | 0,00828297 |
| Uncharacterized loc102643207 /// mitochondrial ribosomal protein l48                                                   | <i>Loc102643207 /// mrpl48</i> | 1,22738256 | 0,00742942 |
| Tyrosine 3-monooxygenase/tryptophan 5-monooxygenase activation protein, theta polypeptide                              | <i>Ywhaq</i>                   | 1,2273074  | 0,00426057 |
| Peroxiredoxin 1 pseudogene /// peroxiredoxin 1                                                                         | <i>Gm21399 /// prdx1</i>       | 1,2269683  | 0,00859906 |
| Cysteine-rich secretory protein lccl domain containing 1                                                               | <i>Crispld1</i>                | 1,22656083 | 0,00724376 |
| Replication factor c (activator 1) 5                                                                                   | <i>Rfc5</i>                    | 1,22639577 | 0,0098258  |
| Yy1 associated factor 2                                                                                                | <i>Yaf2</i>                    | 1,22613227 | 0,0043725  |
| Ubiquitin associated domain containing 1                                                                               | <i>Ubac1</i>                   | 1,22394021 | 0,00942401 |
| Macrophage migration inhibitory factor                                                                                 | <i>Mif</i>                     | 1,22391009 | 0,00645859 |
| Cell division cycle 45                                                                                                 | <i>Cdc45</i>                   | 1,22375326 | 0,0059314  |
| Transmembrane and immunoglobulin domain containing 1                                                                   | <i>Tmigd1</i>                  | 1,2229615  | 0,00968053 |
| Coatomer protein complex, subunit beta 2 (beta prime)                                                                  | <i>Copb2</i>                   | 1,22194474 | 0,00523193 |
| Peptidase d                                                                                                            | <i>Pepd</i>                    | 1,22143252 | 0,00866841 |
| Anaphase promoting complex subunit 4                                                                                   | <i>Anapc4</i>                  | 1,22112118 | 0,00987219 |
| Afg3-like aaa atpase 2                                                                                                 | <i>Afg3l2</i>                  | 1,22083665 | 0,00662571 |
| Bra1 interacting protein c-terminal helicase 1, opposite strand                                                        | <i>Brip1os</i>                 | 1,21907406 | 0,00631492 |

| Secreted phosphoprotein 2                                                                                      | <i>Spp2</i>          | 1,21840341 | 0,00981578 |
|----------------------------------------------------------------------------------------------------------------|----------------------|------------|------------|
| Isocitrate dehydrogenase 3 (nad+), gamma                                                                       | <i>Idh3g</i>         | 1,21295416 | 0,00814906 |
| Actin related protein 2/3 complex, subunit 1a                                                                  | <i>Arpc1a</i>        | 1,21229144 | 0,00989766 |
| Mitochondrial ribosomal protein l10                                                                            | <i>Mrpl10</i>        | 1,21051309 | 0,00782971 |
| Centrobin, centrosomal brca2 interacting protein                                                               | <i>Cntrob</i>        | 1,20229624 | 0,00975398 |
| Gene.Title                                                                                                     | Gene.Symbol          | 2^logFC    | adj.p.val  |
| Matrix metalloproteinase 13                                                                                    | <i>Mmp13</i>         | -213,53317 | 3,44E-12   |
| Inactive X specific transcripts                                                                                | <i>Xist</i>          | -142,42203 | 6,45E-11   |
| Inhibin beta-B                                                                                                 | <i>Inhbb</i>         | -125,63207 | 6,55E-10   |
| Lysyl oxidase                                                                                                  | <i>Lox</i>           | -72,205729 | 3,23E-10   |
| Gremlin 1                                                                                                      | <i>Grem1</i>         | -68,754314 | 2,71E-10   |
| Fibronectin 1                                                                                                  | <i>Fn1</i>           | -55,407195 | 2,71E-10   |
| Interleukin 13 receptor, alpha 1                                                                               | <i>Il13ra1</i>       | -53,469942 | 1,71E-09   |
| Glucosamine-6-phosphate deaminase 2                                                                            | <i>Gnpda2</i>        | -51,206631 | 6,45E-11   |
| Serine (or cysteine) peptidase inhibitor, clade E, member 2                                                    | <i>Serpine2</i>      | -50,629947 | 6,45E-11   |
| Proline rich 13                                                                                                | <i>Prr13</i>         | -47,123873 | 2,33E-10   |
| Trypsin 4 /// trypsin 5                                                                                        | <i>Try4 /// Try5</i> | -44,750827 | 4,21E-10   |
| Lectin, galactoside binding-like                                                                               | <i>Lgalsl</i>        | -44,138611 | 1,14E-10   |
| Regulator of calcineurin 2                                                                                     | <i>Rcan2</i>         | -37,599922 | 2,03E-10   |
| SRY (sex determining region Y)-box 11                                                                          | <i>Sox11</i>         | -36,640318 | 2,06E-10   |
| Anthrax toxin receptor 1                                                                                       | <i>Antxr1</i>        | -34,773312 | 2,71E-10   |
| UDP-glcna:betagal beta-1,3-N-acetylglucosaminyltransferase 9                                                   | <i>B3gnt9</i>        | -31,127934 | 6,55E-10   |
| Acyl-coa thioesterase 1                                                                                        | <i>Acot1</i>         | -29,65227  | 6,30E-10   |
| Serum amyloid A 3                                                                                              | <i>Saa3</i>          | -29,557842 | 4,21E-10   |
| A disintegrin-like and metalloproteinase (reprolysin type) with thrombospondin type 1 motif, 5 (aggrecanase-2) | <i>Adamts5</i>       | -29,341216 | 2,20E-10   |
| Clusterin                                                                                                      | <i>Clu</i>           | -28,19451  | 1,14E-10   |
| Interleukin 13 receptor, alpha 2                                                                               | <i>Il13ra2</i>       | -27,080658 | 5,59E-09   |
| Ceruloplasmin                                                                                                  | <i>Cp</i>            | -26,483137 | 3,42E-09   |
| Nuclear factor I/B                                                                                             | <i>Nfib</i>          | -26,442483 | 8,30E-10   |
| Heparan sulfate 6-O-sulfotransferase 2                                                                         | <i>Hs6st2</i>        | -24,72591  | 8,37E-10   |
| Transmembrane protein 176A                                                                                     | <i>Tmem176a</i>      | -23,987612 | 5,89E-09   |
| Transmembrane protein 176B                                                                                     | <i>Tmem176b</i>      | -23,983272 | 4,85E-10   |
| Ribonuclease, rnase A family 4                                                                                 | <i>Rnase4</i>        | -23,807461 | 4,21E-09   |
| Solute carrier family 25 (mitochondrial carrier ornithine transporter), member 15                              | <i>Slc25a15</i>      | -23,295105 | 6,37E-10   |
| Lysophosphatidic acid receptor 4                                                                               | <i>Lpar4</i>         | -22,849717 | 1,00E-07   |
| Fibroblast growth factor 7                                                                                     | <i>Fgf7</i>          | -22,310157 | 1,58E-09   |
| ATP-binding cassette, sub-family G (WHITE), member 2                                                           | <i>Abcg2</i>         | -22,059047 | 3,57E-09   |
| Glucosaminyl (N-acetyl) transferase 2, I-branching enzyme                                                      | <i>Gcnt2</i>         | -21,954323 | 2,23E-09   |
| Solute carrier family 24 (sodium/potassium/calcium exchanger), member 3                                        | <i>Slc24a3</i>       | -21,926616 | 1,03E-08   |

|                                                                                |                        |            |          |
|--------------------------------------------------------------------------------|------------------------|------------|----------|
| Immunoglobulin superfamily, DCC subclass, member 4                             | <i>Igdcc4</i>          | -21,43308  | 5,96E-10 |
| Myogenic factor 5                                                              | <i>Myf5</i>            | -21,099131 | 4,21E-10 |
| Aldo-keto reductase family 1, member C18                                       | <i>Akr1c18</i>         | -20,912855 | 1,04E-09 |
| Guanine deaminase                                                              | <i>Gda</i>             | -20,632907 | 2,58E-09 |
| Transmembrane protein 98                                                       | <i>Tmem98</i>          | -20,555627 | 1,93E-07 |
| Disabled 2, mitogen-responsive phosphoprotein                                  | <i>Dab2</i>            | -20,521364 | 8,89E-10 |
| Cholinergic receptor, nicotinic, beta polypeptide 1 (muscle)                   | <i>Chrn1</i>           | -20,39487  | 1,25E-09 |
| Sphingomyelin phosphodiesterase, acid-like 3B                                  | <i>Smpdl3b</i>         | -20,007048 | 2,02E-09 |
| Brain derived neurotrophic factor                                              | <i>Bdnf</i>            | -19,836436 | 3,84E-09 |
| Epidermal growth factor-containing fibulin-like extracellular matrix protein 1 | <i>Efemp1</i>          | -19,404751 | 1,88E-09 |
| Protocadherin 7                                                                | <i>Pcdh7</i>           | -19,087566 | 1,44E-09 |
| Frizzled homolog 6 (Drosophila)                                                | <i>Fzd6</i>            | -18,606621 | 3,07E-09 |
| Cadherin 15                                                                    | <i>Cdh15</i>           | -17,877482 | 1,58E-09 |
| Protein kinase D1                                                              | <i>Prkd1</i>           | -17,690578 | 2,20E-10 |
| Metallothionein 2                                                              | <i>Mt2</i>             | -16,984148 | 3,32E-10 |
| Tetratricopeptide repeat domain 30A1                                           | <i>Ttc30a1</i>         | -16,949514 | 3,30E-07 |
| PRKC, apoptosis, WT1, regulator                                                | <i>Pawr</i>            | -16,667418 | 3,03E-08 |
| Insulin-like growth factor binding protein 5                                   | <i>Igfbp5</i>          | -16,645444 | 6,39E-10 |
| Stearoyl-Coenzyme A desaturase 1                                               | <i>Scd1</i>            | -16,393254 | 3,75E-10 |
| Fibronectin type III domain containing 4                                       | <i>Fndc4</i>           | -15,990521 | 1,55E-08 |
| Leucine rich repeat protein 1, neuronal                                        | <i>Lrrn1</i>           | -15,89245  | 1,55E-08 |
| Haptoglobin                                                                    | <i>Hp</i>              | -15,545423 | 4,21E-10 |
| Collagen, type IV, alpha 1                                                     | <i>Col4a1</i>          | -15,276089 | 2,36E-09 |
| S100 calcium binding protein A8 (calgranulin A)                                | <i>S100a8</i>          | -15,160143 | 3,73E-09 |
| Collagen, type IV, alpha 2                                                     | <i>Col4a2</i>          | -14,640044 | 5,99E-09 |
| Receptor accessory protein 1                                                   | <i>Reep1</i>           | -14,616622 | 5,64E-09 |
| Nephronectin                                                                   | <i>Npnt</i>            | -13,783281 | 4,57E-08 |
| Myc induced nuclear antigen                                                    | <i>Mina</i>            | -13,669299 | 2,64E-09 |
| Neuronal regeneration related protein                                          | <i>Nrep</i>            | -13,419839 | 2,49E-08 |
| Carbonic anhydrase 3                                                           | <i>Car3</i>            | -13,380518 | 2,54E-08 |
| Coagulation factor III                                                         | <i>F3</i>              | -13,262845 | 6,53E-08 |
| Oncostatin M receptor                                                          | <i>Osmr</i>            | -12,94217  | 3,07E-09 |
| Carbonyl reductase 1                                                           | <i>Cbr1</i>            | -12,91644  | 2,36E-09 |
| Four and a half LIM domains 1                                                  | <i>Fhl1</i>            | -12,520381 | 5,14E-09 |
| B cell translocation gene 3 /// B-cell translocation gene 3 pseudogene         | <i>Btg3 /// Gm7334</i> | -12,431184 | 7,58E-09 |
| Cyclin-dependent kinase 14                                                     | <i>Cdk14</i>           | -12,405975 | 1,01E-08 |
| Forkhead box C2                                                                | <i>Foxc2</i>           | -12,400636 | 9,51E-09 |
| Signal-regulatory protein alpha                                                | <i>Sirpa</i>           | -12,322868 | 8,02E-10 |
| Lipocalin 2                                                                    | <i>Lcn2</i>            | -12,286672 | 1,48E-08 |
| Bradykinin receptor, beta 1                                                    | <i>Bdkrb1</i>          | -12,282902 | 4,21E-10 |
| Protocadherin 18                                                               | <i>Pcdh18</i>          | -12,178454 | 5,93E-09 |
| Matrix metalloproteinase 3                                                     | <i>Mmp3</i>            | -12,037466 | 1,51E-08 |



|                                                                                   |                        |            |          |
|-----------------------------------------------------------------------------------|------------------------|------------|----------|
| Collapsin response mediator protein 1                                             | <i>Crmp1</i>           | -12,027358 | 9,88E-10 |
| Acyl-coa thioesterase 1 /// acyl-coa thioesterase 2                               | <i>Acot1 /// Acot2</i> | -11,733357 | 6,00E-09 |
| PDZ and LIM domain 3                                                              | <i>Pdlim3</i>          | -11,668623 | 4,21E-10 |
| Nidogen 1                                                                         | <i>Nid1</i>            | -11,455679 | 1,26E-07 |
| ELAV (embryonic lethal, abnormal vision, Drosophila)-like 2 (Hu antigen B)        | <i>Elavl2</i>          | -11,416921 | 1,63E-08 |
| Interleukin 1 receptor antagonist                                                 | <i>Il1rn</i>           | -11,196726 | 2,90E-09 |
| Desmocollin 2                                                                     | <i>Dsc2</i>            | -10,80115  | 6,55E-09 |
| Titin                                                                             | <i>Ttn</i>             | -10,662864 | 1,44E-09 |
| Pleckstrin                                                                        | <i>Plek</i>            | -10,536    | 9,45E-09 |
| CXADR-like membrane protein                                                       | <i>Clmp</i>            | -10,308937 | 7,70E-07 |
| Connective tissue growth factor                                                   | <i>Ctgf</i>            | -10,126952 | 6,52E-09 |
| CD53 antigen                                                                      | <i>Cd53</i>            | -9,8147674 | 7,61E-08 |
| RIKEN cdna 6720475J19 gene                                                        | <i>6720475J19Rik</i>   | -9,7584683 | 1,24E-08 |
| RIKEN cdna D430019H16 gene                                                        | <i>D430019H16Rik</i>   | -9,0712486 | 2,12E-09 |
| Histocompatibility 2, D region locus 1 /// histocompatibility 2, D region locus L | <i>H2-D1 /// H2-L</i>  | -9,0134839 | 6,77E-09 |
| Actin, alpha 2, smooth muscle, aorta                                              | <i>Acta2</i>           | -8,9503748 | 1,16E-08 |
| Midkine                                                                           | <i>Mdk</i>             | -8,7477468 | 6,53E-08 |
| Scavenger receptor class A, member 3                                              | <i>Scara3</i>          | -8,6740238 | 6,52E-09 |
| Serine (or cysteine) peptidase inhibitor, clade B, member 2                       | <i>Serpinb2</i>        | -8,520025  | 1,45E-07 |
| Armado repeat containing, X-linked 4                                              | <i>Armcx4</i>          | -8,2608939 | 3,57E-09 |
| CD9 antigen                                                                       | <i>Cd9</i>             | -8,187259  | 6,55E-10 |
| Histocompatibility 2, D region locus 1                                            | <i>H2-D1</i>           | -8,1750962 | 5,46E-09 |
| Thrombospondin 3                                                                  | <i>Thbs3</i>           | -8,1709349 | 2,04E-08 |
| CCAAT/enhancer binding protein (C/EBP), delta                                     | <i>Cebpd</i>           | -8,0217563 | 9,22E-08 |
| N-myc downstream regulated gene 1                                                 | <i>Ndrp1</i>           | -8,0180733 | 2,37E-08 |
| Iroquois related homeobox 3                                                       | <i>Irx3</i>            | -7,8722666 | 2,79E-09 |
| Matrix metalloproteinase 2                                                        | <i>Mmp2</i>            | -7,8311422 | 2,18E-09 |
| Starch binding domain 1                                                           | <i>Stbd1</i>           | -7,8279143 | 3,07E-09 |
| Chemokine (C-X-C motif) ligand 5                                                  | <i>Cxcl5</i>           | -7,7666984 | 2,86E-08 |
| Hyaluronan synthase 2                                                             | <i>Has2</i>            | -7,7199024 | 5,45E-08 |
| Ectonucleotide pyrophosphatase/phosphodiesterase 5                                | <i>Enpp5</i>           | -7,5355376 | 1,44E-06 |
| Netrin 1                                                                          | <i>Ntn1</i>            | -7,5276327 | 2,86E-08 |
| Prostaglandin-endoperoxide synthase 2                                             | <i>Ptgs2</i>           | -7,5100753 | 1,66E-06 |
| Histocompatibility 2, K1, K region                                                | <i>H2-K1</i>           | -7,4754257 | 8,81E-10 |
| Paired box 7                                                                      | <i>Pax7</i>            | -7,3605056 | 1,62E-06 |
| ATPase, Na <sup>+</sup> /K <sup>+</sup> transporting, alpha 3 polypeptide         | <i>Atp1a3</i>          | -7,3082359 | 1,46E-05 |
| Choline kinase alpha                                                              | <i>Chka</i>            | -7,3036551 | 2,73E-08 |
| Matrix metalloproteinase 23                                                       | <i>Mmp23</i>           | -7,2987182 | 1,18E-07 |
| Collagen, type III, alpha 1                                                       | <i>Col3a1</i>          | -7,2899813 | 2,33E-09 |
| SMT3 suppressor of mif two 3 homolog 3 (yeast)                                    | <i>Sumo3</i>           | -7,2843802 | 3,24E-09 |
| Tumor protein D52-like 1                                                          | <i>Tpd52l1</i>         | -7,2525191 | 4,91E-09 |
| Family with sequence similarity 132, member A                                     | <i>Fam132a</i>         | -7,2202857 | 1,93E-07 |
| Sphingosine kinase 1                                                              | <i>Sphk1</i>           | -7,1806105 | 3,84E-08 |

|                                                                                               |                         |            |          |
|-----------------------------------------------------------------------------------------------|-------------------------|------------|----------|
| Cyclin-dependent kinase inhibitor 2A                                                          | <i>Cdkn2a</i>           | -7,1556195 | 1,37E-07 |
| Ankyrin repeat domain 1 (cardiac muscle)                                                      | <i>Ankrd1</i>           | -7,0441502 | 1,58E-09 |
| Small nucleolar RNA host gene 1                                                               | <i>Snhg1</i>            | -7,043527  | 2,33E-09 |
| A disintegrin-like and metallopeptidase (reprolysin type) with thrombospondin type 1 motif, 1 | <i>Adamts1</i>          | -6,922291  | 7,60E-08 |
| Cathepsin F                                                                                   | <i>Ctsf</i>             | -6,8066507 | 1,72E-09 |
| Tumor necrosis factor, alpha-induced protein 2                                                | <i>Tnfaip2</i>          | -6,662343  | 2,70E-07 |
| Very low density lipoprotein receptor                                                         | <i>Vldlr</i>            | -6,6544573 | 2,23E-06 |
| Oligodendrocyte transcription factor 1                                                        | <i>Olig1</i>            | -6,6102193 | 8,86E-09 |
| Podocalyxin-like                                                                              | <i>Podxl</i>            | -6,6043692 | 1,45E-07 |
| Collagen, type V, alpha 2                                                                     | <i>Col5a2</i>           | -6,5806915 | 3,99E-08 |
| KDEL (Lys-Asp-Glu-Leu) endoplasmic reticulum protein retention receptor 3                     | <i>Kdelr3</i>           | -6,5166688 | 7,75E-09 |
| Interleukin 1 receptor accessory protein                                                      | <i>Il1rap</i>           | -6,5070999 | 1,11E-06 |
| Solute carrier family 44, member 2                                                            | <i>Slc44a2</i>          | -6,4986194 | 5,95E-07 |
| Nucleolar protein 3 (apoptosis repressor with CARD domain)                                    | <i>Nol3</i>             | -6,4182831 | 6,09E-07 |
| Protein tyrosine phosphatase, receptor type, D                                                | <i>Ptprd</i>            | -6,3535944 | 1,52E-07 |
| Transmembrane protein 121                                                                     | <i>Tmem121</i>          | -6,3221863 | 1,48E-08 |
| Nuclear paraspeckle assembly transcript 1 (non-protein coding)                                | <i>Neat1</i>            | -6,2828259 | 8,51E-07 |
| Frizzled homolog 4 (Drosophila)                                                               | <i>Fzd4</i>             | -6,2611551 | 9,60E-08 |
| Procollagen C-endopeptidase enhancer 2                                                        | <i>Pcolce2</i>          | -6,1889154 | 1,94E-09 |
| Paired related homeobox 2                                                                     | <i>Prrx2</i>            | -6,1546609 | 5,51E-08 |
| WAP four-disulfide core domain 2                                                              | <i>Wfdc2</i>            | -6,1427031 | 2,62E-08 |
| Abhydrolase domain containing 6                                                               | <i>Abhd6</i>            | -6,1292932 | 2,08E-07 |
| CDC42 effector protein (Rho gtpase binding) 3                                                 | <i>Cdc42ep3</i>         | -6,0831126 | 1,01E-08 |
| CDC42 effector protein (Rho gtpase binding) 5                                                 | <i>Cdc42ep5</i>         | -6,049787  | 6,63E-08 |
| Adenosine A2b receptor                                                                        | <i>Adora2b</i>          | -6,0169607 | 2,31E-08 |
| Retinol binding protein 1, cellular                                                           | <i>Rbp1</i>             | -5,9565427 | 1,48E-07 |
| Coagulation factor XIII, A1 subunit                                                           | <i>F13a1</i>            | -5,9425848 | 1,39E-06 |
| Solute carrier family 40 (iron-regulated transporter), member 1                               | <i>Slc40a1</i>          | -5,8807007 | 1,49E-07 |
| Neural precursor cell expressed, developmentally down-regulated gene 9                        | <i>Nedd9</i>            | -5,8592177 | 1,36E-07 |
| Glycoprotein 49 A /// leukocyte immunoglobulin-like receptor, subfamily B, member 4           | <i>Gp49a /// Lilrb4</i> | -5,780959  | 7,06E-07 |
| Malignant T cell amplified sequence 2                                                         | <i>Mcts2</i>            | -5,739085  | 1,99E-07 |
| Poly (ADP-ribose) polymerase family, member 12                                                | <i>Parp12</i>           | -5,643457  | 2,04E-06 |
| Membrane bound O-acyltransferase domain containing 2                                          | <i>Mboat2</i>           | -5,6153325 | 1,93E-07 |
| Serum deprivation response                                                                    | <i>Sdpr</i>             | -5,5602266 | 2,29E-07 |
| Sortilin-related VPS10 domain containing receptor 2                                           | <i>Sorcs2</i>           | -5,5115323 | 2,25E-08 |
| Secretory leukocyte peptidase inhibitor                                                       | <i>Slpi</i>             | -5,4858615 | 5,06E-08 |
| SH3 domain binding glutamic acid-rich protein like 2                                          | <i>Sh3bgrl2</i>         | -5,4120912 | 3,46E-08 |
| Family with sequence similarity 213, member A                                                 | <i>Fam213a</i>          | -5,3798927 | 3,84E-06 |
| Junction adhesion molecule 3                                                                  | <i>Jam3</i>             | -5,357589  | 6,22E-07 |
| Zinc finger, DHHC domain containing 2                                                         | <i>Zdhhc2</i>           | -5,34096   | 5,47E-06 |

|                                                                                                                                                                                                                                                                                                                                                          |                                                                                                                                          |            |          |
|----------------------------------------------------------------------------------------------------------------------------------------------------------------------------------------------------------------------------------------------------------------------------------------------------------------------------------------------------------|------------------------------------------------------------------------------------------------------------------------------------------|------------|----------|
| Berardinelli-Seip congenital lipodystrophy 2 homolog (seipin)                                                                                                                                                                                                                                                                                            | <i>Bscl2</i>                                                                                                                             | -5,3351753 | 3,90E-08 |
| Beta-1,4-N-acetyl-galactosaminyl transferase 1                                                                                                                                                                                                                                                                                                           | <i>B4galnt1</i>                                                                                                                          | -5,2602608 | 6,05E-08 |
| MARCKS-like 1                                                                                                                                                                                                                                                                                                                                            | <i>Marcksl1</i>                                                                                                                          | -5,2300082 | 3,74E-08 |
| Coxsackie virus and adenovirus receptor                                                                                                                                                                                                                                                                                                                  | <i>Cxadr</i>                                                                                                                             | -5,2271679 | 9,55E-07 |
| Homeobox B9                                                                                                                                                                                                                                                                                                                                              | <i>Hoxb9</i>                                                                                                                             | -5,1719859 | 4,66E-07 |
| Acyl-coa thioesterase 4                                                                                                                                                                                                                                                                                                                                  | <i>Acot4</i>                                                                                                                             | -5,0572196 | 5,95E-06 |
| Integrin alpha 6                                                                                                                                                                                                                                                                                                                                         | <i>Itga6</i>                                                                                                                             | -4,9577248 | 1,34E-07 |
| MACRO domain containing 1                                                                                                                                                                                                                                                                                                                                | <i>Macrocl1</i>                                                                                                                          | -4,9552556 | 6,24E-08 |
| PTK7 protein tyrosine kinase 7                                                                                                                                                                                                                                                                                                                           | <i>Ptk7</i>                                                                                                                              | -4,9502057 | 3,73E-09 |
| Myosin ID                                                                                                                                                                                                                                                                                                                                                | <i>Myo1d</i>                                                                                                                             | -4,9104612 | 1,24E-05 |
| Nuclear factor, interleukin 3, regulated                                                                                                                                                                                                                                                                                                                 | <i>Nfil3</i>                                                                                                                             | -4,885142  | 1,47E-08 |
| Cdna sequence BC002189                                                                                                                                                                                                                                                                                                                                   | <i>BC002189</i>                                                                                                                          | -4,8428062 | 4,63E-05 |
| Tripartite motif-containing 47                                                                                                                                                                                                                                                                                                                           | <i>Trim47</i>                                                                                                                            | -4,8406718 | 4,08E-08 |
| Family with sequence similarity 46, member C                                                                                                                                                                                                                                                                                                             | <i>Fam46c</i>                                                                                                                            | -4,8116964 | 4,23E-07 |
| Nidogen 2                                                                                                                                                                                                                                                                                                                                                | <i>Nid2</i>                                                                                                                              | -4,8106016 | 5,39E-08 |
| Plasminogen activator, tissue                                                                                                                                                                                                                                                                                                                            | <i>Plat</i>                                                                                                                              | -4,7763604 | 5,53E-07 |
| Prostaglandin F receptor                                                                                                                                                                                                                                                                                                                                 | <i>Ptgfr</i>                                                                                                                             | -4,7574681 | 6,20E-07 |
| Zinc finger protein, multitype 2                                                                                                                                                                                                                                                                                                                         | <i>Zfp2</i>                                                                                                                              | -4,7536062 | 1,49E-08 |
| Scavenger receptor class A, member 5 (putative)                                                                                                                                                                                                                                                                                                          | <i>Scara5</i>                                                                                                                            | -4,7377895 | 1,36E-07 |
| Matrix metalloproteinase 10                                                                                                                                                                                                                                                                                                                              | <i>Mmp10</i>                                                                                                                             | -4,7316064 | 1,46E-07 |
| Reticulon 2 (Z-band associated protein)                                                                                                                                                                                                                                                                                                                  | <i>Rtn2</i>                                                                                                                              | -4,7140536 | 1,37E-06 |
| Kruppel-like factor 2 (lung)                                                                                                                                                                                                                                                                                                                             | <i>Klf2</i>                                                                                                                              | -4,7006379 | 7,11E-08 |
| Cytochrome P450, family 4, subfamily v, polypeptide 3                                                                                                                                                                                                                                                                                                    | <i>Cyp4v3</i>                                                                                                                            | -4,6938015 | 2,90E-07 |
| ABRA C-terminal like /// predicted pseudogene 6314                                                                                                                                                                                                                                                                                                       | <i>Abrac1 /// Gm6314</i>                                                                                                                 | -4,6533144 | 1,44E-08 |
| Adenylate kinase 4                                                                                                                                                                                                                                                                                                                                       | <i>Ak4</i>                                                                                                                               | -4,6191065 | 4,12E-08 |
| Suppressor of cytokine signaling 3                                                                                                                                                                                                                                                                                                                       | <i>Socs3</i>                                                                                                                             | -4,5895309 | 2,51E-07 |
| Solute carrier family 16 (monocarboxylic acid transporters), member 1                                                                                                                                                                                                                                                                                    | <i>Slc16a1</i>                                                                                                                           | -4,5698151 | 3,23E-07 |
| Solute carrier family 16 (monocarboxylic acid transporters), member 2                                                                                                                                                                                                                                                                                    | <i>Slc16a2</i>                                                                                                                           | -4,5572521 | 1,34E-06 |
| Sialic acid acetyltransferase                                                                                                                                                                                                                                                                                                                            | <i>Siae</i>                                                                                                                              | -4,5205357 | 8,31E-07 |
| Transforming growth factor, beta 2                                                                                                                                                                                                                                                                                                                       | <i>Tgfb2</i>                                                                                                                             | -4,4917354 | 8,60E-07 |
| Gap junction protein, gamma 1                                                                                                                                                                                                                                                                                                                            | <i>Gjc1</i>                                                                                                                              | -4,4731206 | 2,71E-08 |
| 3-hydroxybutyrate dehydrogenase, type 1                                                                                                                                                                                                                                                                                                                  | <i>Bdh1</i>                                                                                                                              | -4,3618719 | 4,89E-08 |
| GM2 ganglioside activator protein                                                                                                                                                                                                                                                                                                                        | <i>Gm2a</i>                                                                                                                              | -4,3377518 | 4,52E-07 |
| S100 calcium binding protein A16                                                                                                                                                                                                                                                                                                                         | <i>S100a16</i>                                                                                                                           | -4,3261396 | 5,93E-09 |
| Histone cluster 1, H4a /// histone cluster 1, H4b /// histone cluster 1, H4c /// histone cluster 1, H4d /// histone cluster 1, H4f /// histone cluster 1, H4h /// histone cluster 1, H4i /// histone cluster 1, H4j /// histone cluster 1, H4k /// histone cluster 1, H4m /// histone cluster 1, H4n /// histone cluster 2, H4 /// histone cluster 4, H4 | <i>Hist1h4a /// Hist1h4b /// Hist1h4c /// Hist1h4d /// Hist1h4f /// Hist1h4h /// Hist1h4i /// Hist1h4j /// Hist1h4k /// Hist1h4m ///</i> | -4,32085   | 7,06E-06 |

|                                                                                         |                                                          |            |          |
|-----------------------------------------------------------------------------------------|----------------------------------------------------------|------------|----------|
|                                                                                         | <i>Hist1h4n</i> ///<br><i>Hist2h4</i> /// <i>Hist4h4</i> |            |          |
| Distal-less homeobox 4                                                                  | <i>Dlx4</i>                                              | -4,3149691 | 4,53E-07 |
| Decorin                                                                                 | <i>Dcn</i>                                               | -4,314674  | 1,92E-06 |
| Leptin receptor                                                                         | <i>Lepr</i>                                              | -4,2643964 | 2,75E-06 |
| SRY (sex determining region Y)-box 12                                                   | <i>Sox12</i>                                             | -4,248915  | 2,56E-07 |
| Ena-vasodilator stimulated phosphoprotein                                               | <i>Evl</i>                                               | -4,2396419 | 9,89E-07 |
| Estrogen related receptor, beta                                                         | <i>Esrrb</i>                                             | -4,2380164 | 3,52E-06 |
| Collectin sub-family member 12                                                          | <i>Colec12</i>                                           | -4,2328207 | 1,71E-06 |
| Junction adhesion molecule 2                                                            | <i>Jam2</i>                                              | -4,2061606 | 1,51E-06 |
| RIKEN cdna 5730408K05 gene /// microRNA 5136                                            | <i>5730408K05Rik</i> ///<br><i>Mir5136</i>               | -4,1909173 | 5,21E-06 |
| Periostin, osteoblast specific factor                                                   | <i>Postn</i>                                             | -4,1774896 | 2,49E-08 |
| Solute carrier family 25 (mitochondrial carnitine/acylcarnitine translocase), member 20 | <i>Slc25a20</i>                                          | -4,1440571 | 1,36E-07 |
| Caspase 4, apoptosis-related cysteine peptidase                                         | <i>Casp4</i>                                             | -4,1403709 | 4,09E-08 |
| Zinc finger protein of the cerebellum 2                                                 | <i>Zic2</i>                                              | -4,120063  | 1,90E-07 |
| Polycomb group ring finger 6                                                            | <i>Pcgf6</i>                                             | -4,1161639 | 4,57E-08 |
| Metallothionein 1                                                                       | <i>Mt1</i>                                               | -4,1156477 | 1,93E-07 |
| RAR-related orphan receptor gamma                                                       | <i>Rorc</i>                                              | -4,0972904 | 2,06E-06 |
| Fibulin 1                                                                               | <i>Fbln1</i>                                             | -4,0834853 | 4,00E-07 |
| Cytidine monophospho-N-acetylneuraminic acid hydroxylase                                | <i>Cmah</i>                                              | -4,0774904 | 2,32E-06 |
| Ankyrin repeat domain 10                                                                | <i>Ankrd10</i>                                           | -4,0697923 | 3,67E-07 |
| CKLF-like MARVEL transmembrane domain containing 7                                      | <i>Cmtm7</i>                                             | -4,0642102 | 1,25E-07 |
| F-box protein 32                                                                        | <i>Fbxo32</i>                                            | -4,0613342 | 4,44E-06 |
| Ribosomal protein S20                                                                   | <i>Rps20</i>                                             | -4,0600876 | 9,96E-07 |
| Melanocyte proliferating gene 1                                                         | <i>Myg1</i>                                              | -3,9952414 | 6,63E-08 |
| Interferon gamma inducible protein 30                                                   | <i>Ifi30</i>                                             | -3,9779674 | 2,04E-08 |
| Acyl-coa thioesterase 2                                                                 | <i>Acot2</i>                                             | -3,9448483 | 4,57E-08 |
| Ferredoxin 1-like /// Raver1-Fdx1l readthrough                                          | <i>Fdx1l</i> /// <i>Raver1-fdx1l</i>                     | -3,904555  | 9,97E-08 |
| Slit homolog 2 (Drosophila)                                                             | <i>Slit2</i>                                             | -3,9042483 | 7,22E-06 |
| Sushi-repeat-containing protein, X-linked 2                                             | <i>SrpX2</i>                                             | -3,8953438 | 2,83E-06 |
| Growth factor receptor bound protein 14                                                 | <i>Grb14</i>                                             | -3,8763708 | 1,41E-05 |
| Transmembrane protein 38B                                                               | <i>Tmem38b</i>                                           | -3,8720062 | 4,93E-06 |
| Guanine nucleotide binding protein, alpha 14                                            | <i>Gna14</i>                                             | -3,8589139 | 7,63E-07 |
| Alpha 1,4-galactosyltransferase                                                         | <i>A4galt</i>                                            | -3,8514778 | 2,29E-06 |
| Thrombospondin 1                                                                        | <i>Thbs1</i>                                             | -3,851401  | 2,89E-06 |
| Paternally expressed 3                                                                  | <i>Peg3</i>                                              | -3,8383861 | 1,72E-08 |
| Fibronectin type III domain containing 1                                                | <i>Fndc1</i>                                             | -3,8043144 | 3,87E-06 |
| Solute carrier family 4 (anion exchanger), member 4                                     | <i>Slc4a4</i>                                            | -3,788449  | 4,85E-06 |
| Collagen, type V, alpha 3                                                               | <i>Col5a3</i>                                            | -3,776821  | 1,10E-06 |
| Protease, serine 23                                                                     | <i>Prss23</i>                                            | -3,7643586 | 3,60E-06 |
| Membrane protein, palmitoylated 7 (MAGUK p55 subfamily member 7)                        | <i>Mpp7</i>                                              | -3,7532198 | 2,79E-06 |

|                                                                                                              |                                     |            |            |
|--------------------------------------------------------------------------------------------------------------|-------------------------------------|------------|------------|
| N-acetylated alpha-linked acidic dipeptidase 2                                                               | <i>Naalad2</i>                      | -3,7478646 | 4,39E-06   |
| Follistatin-like 1                                                                                           | <i>Fstl1</i>                        | -3,7321433 | 1,47E-08   |
| Renin binding protein                                                                                        | <i>Renbp</i>                        | -3,7258488 | 3,83E-08   |
| Ets variant 1 /// predicted gene 5454                                                                        | <i>Etv1 /// Gm5454</i>              | -3,7173855 | 2,33E-07   |
| Serglycin                                                                                                    | <i>Srgn</i>                         | -3,7171635 | 4,37E-06   |
| Phosphoribosyl pyrophosphate synthetase 1-like 3                                                             | <i>Prps1l3</i>                      | -3,6855149 | 3,27E-07   |
| Basonuclin 1                                                                                                 | <i>Bnc1</i>                         | -3,679649  | 3,39E-07   |
| Tribbles homolog 2 (Drosophila)                                                                              | <i>Trib2</i>                        | -3,6675639 | 2,22E-07   |
| Zinc finger protein 521                                                                                      | <i>Zfp521</i>                       | -3,6366736 | 1,81E-06   |
| Ectonucleotide pyrophosphatase/phosphodiesterase 2                                                           | <i>Enpp2</i>                        | -3,6309122 | 2,63E-06   |
| Tripartite motif-containing 30A                                                                              | <i>Trim30a</i>                      | -3,6234602 | 3,51E-06   |
| Reticulocalbin 1                                                                                             | <i>Rcn1</i>                         | -3,6223057 | 7,78E-08   |
| Ring finger protein 11                                                                                       | <i>Rnf11</i>                        | -3,6070849 | 1,38E-05   |
| NME/NM23 nucleoside diphosphate kinase 4                                                                     | <i>Nme4</i>                         | -3,5858294 | 1,18E-05   |
| Eukaryotic translation initiation factor 4E member 3                                                         | <i>Eif4e3</i>                       | -3,5762657 | 5,29E-07   |
| Selenium binding protein 1                                                                                   | <i>Selenbp1</i>                     | -3,5688637 | 5,51E-06   |
| Syntaxin 3                                                                                                   | <i>Stx3</i>                         | -3,5493671 | 6,20E-07   |
| Chloride channel 3                                                                                           | <i>Clcn3</i>                        | -3,5473415 | 1,79E-07   |
| Brain expressed myelocytomatosis oncogene                                                                    | <i>Bmyc</i>                         | -3,545725  | 1,59E-06   |
| Insulin receptor substrate 1                                                                                 | <i>Irs1</i>                         | -3,5453103 | 3,67E-07   |
| Integral membrane protein 2A                                                                                 | <i>Itm2a</i>                        | -3,5265346 | 0,00016653 |
| Chromodomain protein, Y chromosome-like                                                                      | <i>Cdyl</i>                         | -3,5206551 | 1,99E-06   |
| RIKEN cdna 1810055G02 gene                                                                                   | <i>1810055G02Rik</i>                | -3,5154313 | 1,07E-08   |
| Component of oligomeric golgi complex 8                                                                      | <i>Cog8</i>                         | -3,4876252 | 6,08E-08   |
| Muscle, skeletal, receptor tyrosine kinase                                                                   | <i>Musk</i>                         | -3,4850363 | 1,68E-07   |
| Four jointed box 1 (Drosophila)                                                                              | <i>Fjx1</i>                         | -3,4819938 | 2,01E-05   |
| Deiodinase, iodothyronine, type II                                                                           | <i>Dio2</i>                         | -3,4812541 | 6,00E-07   |
| Schlafen 2                                                                                                   | <i>Slfn2</i>                        | -3,479936  | 3,39E-06   |
| Regulator of G-protein signaling 19                                                                          | <i>Rgs19</i>                        | -3,4462342 | 4,71E-07   |
| Actin-binding LIM protein 1                                                                                  | <i>Ablim1</i>                       | -3,4420939 | 9,86E-07   |
| Calcium channel, voltage-dependent, L type, alpha 1C subunit                                                 | <i>Cacna1c</i>                      | -3,4355213 | 3,55E-07   |
| Myomesin 2                                                                                                   | <i>Myom2</i>                        | -3,4334165 | 9,68E-07   |
| RIKEN cdna 1190002N15 gene                                                                                   | <i>1190002N15Rik</i>                | -3,4253645 | 3,92E-06   |
| Dapper homolog 1, antagonist of beta-catenin (xenopus)                                                       | <i>Dact1</i>                        | -3,423001  | 1,45E-06   |
| Cyclin-dependent kinase inhibitor 2B (p15, inhibits CDK4)                                                    | <i>Cdkn2b</i>                       | -3,4214807 | 2,28E-05   |
| Component of oligomeric golgi complex 8 /// peptide deformylase (mitochondrial)                              | <i>Cog8 /// Pdf</i>                 | -3,4129843 | 6,36E-08   |
| PDZ and LIM domain 4                                                                                         | <i>Pdlim4</i>                       | -3,4115804 | 1,23E-07   |
| Transmembrane protein 173                                                                                    | <i>Tmem173</i>                      | -3,4094963 | 1,47E-06   |
| Prostaglandin reductase 1                                                                                    | <i>Ptgr1</i>                        | -3,4031754 | 3,00E-07   |
| Ciliary neurotrophic factor /// zinc finger protein 91 /// Zfp91-Cntf readthrough transcript (NMD candidate) | <i>Cntf /// Zfp91 /// Zfp91Cntf</i> | -3,3889911 | 1,46E-07   |
| Cysteine and glycine-rich protein 2                                                                          | <i>Csrp2</i>                        | -3,3820934 | 7,46E-08   |
| Histocompatibility 2, class II antigen A, alpha                                                              | <i>H2-Aa</i>                        | -3,3709734 | 1,14E-05   |

|                                                                                    |                      |            |          |
|------------------------------------------------------------------------------------|----------------------|------------|----------|
| Inhibitor of growth family, member 1                                               | <i>Ing1</i>          | -3,363131  | 7,69E-08 |
| Protocadherin 1                                                                    | <i>Pcdh1</i>         | -3,350499  | 1,63E-05 |
| Growth arrest specific 5                                                           | <i>Gas5</i>          | -3,3467138 | 9,49E-08 |
| Ring finger protein 149                                                            | <i>Rnf149</i>        | -3,3379417 | 7,21E-07 |
| Coronin, actin binding protein, 2B                                                 | <i>Coro2b</i>        | -3,330451  | 9,13E-05 |
| Syndecan 4                                                                         | <i>Sdc4</i>          | -3,3236031 | 1,05E-06 |
| B cell leukemia/lymphoma 3                                                         | <i>Bcl3</i>          | -3,3179232 | 7,87E-06 |
| Dnaj (Hsp40) homolog, subfamily B, member 9                                        | <i>Dnajb9</i>        | -3,3099388 | 1,50E-05 |
| Cytochrome b-245, alpha polypeptide                                                | <i>Cyba</i>          | -3,3098179 | 1,97E-07 |
| Small EDRK-rich factor 1                                                           | <i>Serf1</i>         | -3,3097197 | 2,59E-07 |
| Activating transcription factor 3                                                  | <i>Atf3</i>          | -3,3052807 | 3,05E-07 |
| Zinc finger protein 62                                                             | <i>Zfp62</i>         | -3,2961066 | 5,18E-06 |
| RIKEN cdna D030056L22 gene                                                         | <i>D030056L22Rik</i> | -3,2823294 | 4,13E-08 |
| Histocompatibility 13                                                              | <i>H13</i>           | -3,281641  | 1,99E-07 |
| Family with sequence similarity 129, member A                                      | <i>Fam129a</i>       | -3,2804877 | 9,77E-06 |
| ATPase, H <sup>+</sup> transporting, lysosomal V0 subunit E2                       | <i>ATP6V0E2</i>      | -3,2728209 | 7,60E-06 |
| Solute carrier family 6 (neurotransmitter transporter, glycine), member 9          | <i>SLC6A9</i>        | -3,2723988 | 2,29E-07 |
| Ubiquitin specific peptidase 17-like A                                             | <i>Usp17la</i>       | -3,2695589 | 1,55E-05 |
| RIKEN cdna E330009J07 gene                                                         | <i>E330009J07Rik</i> | -3,2595629 | 1,08E-05 |
| Transmembrane protein 132A                                                         | <i>Tmem132a</i>      | -3,2489087 | 6,34E-07 |
| RAD52 homolog (S. Cerevisiae)                                                      | <i>Rad52</i>         | -3,248531  | 7,53E-06 |
| Family with sequence similarity 122, member A                                      | <i>Fam122a</i>       | -3,2361126 | 8,54E-06 |
| Eomesodermin homolog (Xenopus laevis)                                              | <i>Eomes</i>         | -3,2187681 | 1,17E-05 |
| Rho guanine nucleotide exchange factor (GEF) 5                                     | <i>Arhgef5</i>       | -3,2187415 | 5,12E-07 |
| Leukemia inhibitory factor receptor                                                | <i>Lifr</i>          | -3,2181088 | 6,71E-06 |
| Zinc finger protein of the cerebellum 5                                            | <i>Zic5</i>          | -3,2113066 | 1,63E-06 |
| Tissue inhibitor of metalloproteinase 3                                            | <i>Timp3</i>         | -3,2028526 | 6,39E-07 |
| Par-3 family cell polarity regulator                                               | <i>Pard3</i>         | -3,1967077 | 1,83E-05 |
| CD320 antigen                                                                      | <i>Cd320</i>         | -3,1958343 | 8,50E-08 |
| Poliovirus receptor-related 2                                                      | <i>Pvr12</i>         | -3,1919216 | 7,43E-07 |
| Translation machinery associated 16 homolog (S. Cerevisiae)                        | <i>Tma16</i>         | -3,1913675 | 3,74E-07 |
| Tubulin, beta 2B class IIB                                                         | <i>Tubb2b</i>        | -3,1864181 | 1,31E-06 |
| Synaptotagmin binding, cytoplasmic RNA interacting protein                         | <i>Syncrip</i>       | -3,1752746 | 1,81E-06 |
| Follistatin                                                                        | <i>Fst</i>           | -3,1740203 | 2,17E-07 |
| Nuclear factor of kappa light polypeptide gene enhancer in B cells inhibitor, zeta | <i>Nfkbiz</i>        | -3,1717511 | 7,97E-08 |
| Prolactin family 7, subfamily c, member 1                                          | <i>Prl7c1</i>        | -3,1681457 | 7,47E-07 |
| Phosphodiesterase 4B, camp specific                                                | <i>Pde4b</i>         | -3,149691  | 2,99E-06 |
| Zinc finger protein 810                                                            | <i>Zfp810</i>        | -3,1375508 | 5,97E-06 |
| Mitochondrial ribosomal protein L43                                                | <i>Mrpl43</i>        | -3,1318002 | 2,19E-07 |
| Zinc finger, DHHC domain containing 16                                             | <i>Zdhhc16</i>       | -3,1273375 | 7,47E-08 |
| Aldehyde dehydrogenase 18 family, member A1                                        | <i>Aldh18a1</i>      | -3,1264395 | 2,08E-06 |
| Baculoviral IAP repeat-containing 3                                                | <i>Birc3</i>         | -3,1194038 | 6,94E-06 |

|                                                                          |                                   |            |            |
|--------------------------------------------------------------------------|-----------------------------------|------------|------------|
| Cystathionase (cystathionine gamma-lyase)                                | <i>Cth</i>                        | -3,0987831 | 0,00010665 |
| Histocompatibility 2, D region locus 1 ///                               | <i>H2-D1 ///</i> <i>H2-K1 ///</i> | -3,0967233 | 9,59E-05   |
| histocompatibility 2, K1, K region ///                                   | <i>LOC101056305</i>               |            |            |
| histocompatibility antigen, K-D alpha chain-like                         |                                   |            |            |
| Lipoprotein lipase                                                       | <i>Lpl</i>                        | -3,0960704 | 8,19E-06   |
| Zinc finger protein 91                                                   | <i>Zfp91</i>                      | -3,0936812 | 9,04E-05   |
| Arrestin domain containing 4                                             | <i>Arrdc4</i>                     | -3,0789014 | 3,70E-06   |
| TM2 domain containing 2                                                  | <i>Tm2d2</i>                      | -3,0788298 | 3,29E-06   |
| Myelin protein zero-like 2                                               | <i>Mpzl2</i>                      | -3,0614159 | 2,29E-06   |
| Complement component 3                                                   | <i>C3</i>                         | -3,0581766 | 7,43E-07   |
| Tetratricopeptide repeat domain 13                                       | <i>Ttc13</i>                      | -3,0572622 | 3,93E-08   |
| Spla/ryanodine receptor domain and SOCS box containing 1                 | <i>Spsb1</i>                      | -3,0568164 | 9,59E-07   |
| Integrator complex subunit 5                                             | <i>Ints5</i>                      | -3,0559599 | 1,89E-07   |
| ATPase, Na <sup>+</sup> /K <sup>+</sup> transporting, beta 1 polypeptide | <i>Atplb1</i>                     | -3,0416059 | 1,39E-05   |
| Pseudouridine synthase 3                                                 | <i>Pus3</i>                       | -3,0408838 | 7,18E-06   |
| CD59a antigen                                                            | <i>Cd59a</i>                      | -3,0348221 | 2,47E-06   |
| SUMO-interacting motifs containing 1                                     | <i>Simc1</i>                      | -3,0335084 | 2,95E-07   |
| Ribosomal protein L22                                                    | <i>Rpl22</i>                      | -3,0269046 | 1,86E-07   |
| Neuron specific gene family member 1                                     | <i>Nsg1</i>                       | -3,025951  | 1,47E-06   |
| Tribbles homolog 3 (Drosophila)                                          | <i>Trib3</i>                      | -3,0101013 | 5,91E-07   |
| Growth arrest specific 6                                                 | <i>Gas6</i>                       | -3,0030225 | 3,08E-05   |
| Phosphoenolpyruvate carboxykinase 2 (mitochondrial)                      | <i>Pck2</i>                       | -2,9980923 | 1,88E-07   |
| DNA segment, Chr 19, Brigham & Women's Genetics 1357 expressed           | <i>D19Bwg1357e</i>                | -2,9970499 | 8,54E-07   |
| Tropomyosin 1, alpha                                                     | <i>Tpm1</i>                       | -2,9917688 | 1,60E-05   |
| Zinc finger protein 703                                                  | <i>Zfp703</i>                     | -2,9896759 | 2,47E-06   |
| CD1d1 antigen                                                            | <i>Cd1d1</i>                      | -2,9875229 | 5,26E-06   |
| CCAAT/enhancer binding protein (C/EBP), gamma                            | <i>Cebpg</i>                      | -2,9818454 | 2,92E-07   |
| Metastasis associated lung adenocarcinoma transcript 1 (non-coding RNA)  | <i>Malat1</i>                     | -2,977205  | 0,00166522 |
| NADH dehydrogenase (ubiquinone) 1 alpha subcomplex, assembly factor 4    | <i>Ndufaf4</i>                    | -2,9770896 | 5,63E-07   |
| Pentraxin related gene                                                   | <i>Ptx3</i>                       | -2,9761673 | 9,57E-06   |
| Endothelin converting enzyme 1                                           | <i>Ece1</i>                       | -2,9717876 | 1,63E-06   |
| Family with sequence similarity 195, member A                            | <i>Fam195a</i>                    | -2,9549816 | 1,10E-06   |
| Transmembrane protein 2                                                  | <i>Tmem2</i>                      | -2,9480345 | 3,44E-06   |
| SMAD family member 1                                                     | <i>Smad1</i>                      | -2,9395256 | 5,12E-07   |
| Suppressor of cytokine signaling 2                                       | <i>Socs2</i>                      | -2,9363014 | 1,17E-05   |
| Solute carrier family 25, member 28                                      | <i>Slc25a28</i>                   | -2,9322853 | 6,01E-07   |
| Serine (or cysteine) peptidase inhibitor, clade B, member 9c             | <i>Serpinb9c</i>                  | -2,9216005 | 6,39E-07   |
| STAM binding protein like 1                                              | <i>Stambpl1</i>                   | -2,9205342 | 2,54E-07   |
| Quaking                                                                  | <i>Qk</i>                         | -2,9199444 | 0,000182   |
| Oxidative stress induced growth inhibitor family member 2                | <i>Osgin2</i>                     | -2,9098    | 1,67E-06   |
| Phosphoribosylglycinamide formyltransferase                              | <i>Gart</i>                       | -2,9084275 | 1,26E-07   |
| Exosome component 1                                                      | <i>Exosc1</i>                     | -2,8792985 | 3,16E-07   |

|                                                               |                    |            |            |
|---------------------------------------------------------------|--------------------|------------|------------|
| Son of sevenless homolog 1 (Drosophila)                       | <i>Sos1</i>        | -2,8729444 | 0,00254443 |
| Zinc finger and BTB domain containing 46                      | <i>Zbtb46</i>      | -2,8670737 | 2,06E-07   |
| Kruppel-like factor 9                                         | <i>Klf9</i>        | -2,8661574 | 4,63E-07   |
| Transcription factor 7 like 2, T cell specific, HMG box       | <i>Tcf7l2</i>      | -2,8649841 | 4,16E-07   |
| Platelet derived growth factor receptor, alpha polypeptide    | <i>Pdgfra</i>      | -2,8606526 | 8,38E-06   |
| Ribosomal protein S6                                          | <i>Rps6</i>        | -2,8576161 | 3,86E-07   |
| Serine palmitoyltransferase, long chain base subunit 2        | <i>Sptlc2</i>      | -2,8575359 | 2,23E-07   |
| Intestinal cell kinase                                        | <i>Ick</i>         | -2,8560279 | 8,97E-07   |
| Pantothenate kinase 1                                         | <i>Pank1</i>       | -2,8555084 | 7,77E-07   |
| RAS p21 protein activator 2                                   | <i>Rasa2</i>       | -2,8390523 | 1,74E-05   |
| Expressed sequence AI464131                                   | <i>AI464131</i>    | -2,838945  | 5,91E-07   |
| Gap junction protein, beta 3                                  | <i>Gjb3</i>        | -2,8380223 | 9,94E-06   |
| Peptide deformylase (mitochondrial)                           | <i>Pdf</i>         | -2,8348689 | 7,17E-07   |
| YTH domain family 2                                           | <i>Ythdf2</i>      | -2,8322903 | 4,71E-07   |
| Guanine nucleotide binding protein (G protein), beta 4        | <i>Gnb4</i>        | -2,8220627 | 1,42E-05   |
| Procollagen lysine, 2-oxoglutarate 5-dioxygenase 2            | <i>Plod2</i>       | -2,8215941 | 9,72E-07   |
| Mitochondrial ribosomal protein L24                           | <i>Mrpl24</i>      | -2,8212443 | 3,40E-07   |
| Protein S (alpha)                                             | <i>Pros1</i>       | -2,8134557 | 2,90E-07   |
| Acyl-coa synthetase long-chain family member 1                | <i>Acs1</i>        | -2,8113495 | 7,69E-07   |
| Epidermal growth factor receptor                              | <i>Egfr</i>        | -2,8090294 | 8,23E-06   |
| Neuropilin 1                                                  | <i>Nrp1</i>        | -2,8046346 | 2,48E-06   |
| URI1, prefoldin-like chaperone                                | <i>Uri1</i>        | -2,7976304 | 1,03E-06   |
| Phosphatidylinositol glycan anchor biosynthesis, class Q      | <i>Pigq</i>        | -2,7940169 | 2,15E-06   |
| Predicted gene 13139                                          | <i>Gm13139</i>     | -2,7938064 | 8,70E-07   |
| E26 avian leukemia oncogene 2, 3' domain                      | <i>Ets2</i>        | -2,7758601 | 2,90E-07   |
| Insulin-like growth factor binding protein 3                  | <i>Igfbp3</i>      | -2,7741958 | 4,58E-06   |
| Coiled-coil domain containing 80                              | <i>Ccdc80</i>      | -2,7563342 | 9,86E-07   |
| Glutamic pyruvate transaminase (alanine aminotransferase) 2   | <i>Gpt2</i>        | -2,7414893 | 5,20E-06   |
| Spla/ryanodine receptor domain and SOCS box containing 4      | <i>Spsb4</i>       | -2,7362657 | 8,60E-06   |
| Versican                                                      | <i>Vcan</i>        | -2,7356903 | 8,73E-06   |
| 5'-nucleotidase, cytosolic II                                 | <i>Nt5c2</i>       | -2,7329358 | 2,98E-06   |
| Cathepsin Z                                                   | <i>Ctsz</i>        | -2,7304412 | 2,19E-07   |
| Sulfide quinone reductase-like (yeast)                        | <i>Sqrdl</i>       | -2,7283098 | 5,89E-07   |
| Solute carrier family 20, member 2                            | <i>Slc20a2</i>     | -2,7271153 | 1,78E-07   |
| Presenilin 2                                                  | <i>Psen2</i>       | -2,7183749 | 6,95E-06   |
| Paired box 8                                                  | <i>Pax8</i>        | -2,71497   | 1,65E-06   |
| Dihydrolipoamide branched chain transacylase E2               | <i>Dbt</i>         | -2,7084896 | 7,59E-05   |
| DNA segment, Chr 16, ERATO Doi 472, expressed                 | <i>D16Ertd472e</i> | -2,7045851 | 3,14E-06   |
| Porcupine homolog (Drosophila)                                | <i>Porcn</i>       | -2,7013688 | 3,33E-06   |
| Sortilin 1                                                    | <i>Sort1</i>       | -2,7010036 | 1,09E-05   |
| Potassium inwardly-rectifying channel, subfamily J, member 15 | <i>Kcnj15</i>      | -2,6967151 | 5,35E-05   |
| Solute carrier family 43, member 3                            | <i>Slc43a3</i>     | -2,6806115 | 5,90E-06   |



|                                                                                       |                                                        |            |            |
|---------------------------------------------------------------------------------------|--------------------------------------------------------|------------|------------|
| Serine (or cysteine) peptidase inhibitor, clade H, member 1                           | <i>Serpinh1</i>                                        | -2,677629  | 3,90E-07   |
| PAX3 and PAX7 binding protein 1                                                       | <i>Paxbp1</i>                                          | -2,6755826 | 8,59E-06   |
| Proteoglycan 4 (megakaryocyte stimulating factor, articular superficial zone protein) | <i>Prg4</i>                                            | -2,6647731 | 2,94E-05   |
| Histone cluster 3, h2a                                                                | <i>Hist3h2a</i>                                        | -2,6644495 | 3,53E-06   |
| Ferric-chelate reductase 1                                                            | <i>Frrs1</i>                                           | -2,6628341 | 3,11E-06   |
| Transmembrane protein 203                                                             | <i>Tmem203</i>                                         | -2,6610273 | 1,19E-06   |
| Glycosyltransferase 25 domain containing 1                                            | <i>Glt25d1</i>                                         | -2,6593628 | 6,46E-07   |
| Interleukin enhancer binding factor 3                                                 | <i>Ilf3</i>                                            | -2,6586241 | 2,63E-06   |
| Leucine zipper protein 1                                                              | <i>Luzp1</i>                                           | -2,6487573 | 5,28E-06   |
| Nuclear protein transcription regulator 1                                             | <i>Nupr1</i>                                           | -2,6478122 | 2,79E-06   |
| Trna methyltransferase 1                                                              | <i>Trmt1</i>                                           | -2,6391709 | 4,52E-07   |
| Acyl-coa synthetase long-chain family member 6                                        | <i>Acs16</i>                                           | -2,6342857 | 3,17E-05   |
| Interferon-induced protein with tetratricopeptide repeats 1                           | <i>Ifit1</i>                                           | -2,6295644 | 7,30E-06   |
| Calcium and integrin binding family member 2                                          | <i>Cib2</i>                                            | -2,6273139 | 1,59E-06   |
| Growth arrest specific 1                                                              | <i>Gas1</i>                                            | -2,6235678 | 2,19E-07   |
| Gene trap ROSA 26, Philippe Soriano                                                   | <i>Gt(ROSA)26Sor</i>                                   | -2,6205531 | 3,04E-06   |
| Alanyl (membrane) aminopeptidase                                                      | <i>Anpep</i>                                           | -2,6177025 | 0,00784359 |
| Ribosomal protein L5 /// ribosomal protein L5, pseudogene 2                           | <i>Rpl5 /// Rpl5-ps2</i>                               | -2,6163981 | 3,67E-07   |
| Transmembrane protein 223                                                             | <i>Tmem223</i>                                         | -2,6114084 | 7,44E-07   |
| Selenophosphate synthetase 2                                                          | <i>Sephs2</i>                                          | -2,6102694 | 2,18E-07   |
| Pecanex-like 4 (Drosophila)                                                           | <i>Pcnx14</i>                                          | -2,6083119 | 6,87E-07   |
| STEAP family member 4                                                                 | <i>Steap4</i>                                          | -2,6072279 | 1,18E-06   |
| Yamaguchi sarcoma viral (v-yes) oncogene homolog 1                                    | <i>Yes1</i>                                            | -2,5919534 | 0,00032245 |
| Cyclin-dependent kinase inhibitor 2C (p18, inhibits CDK4)                             | <i>Cdkn2c</i>                                          | -2,5902519 | 1,67E-07   |
| Fin bud initiation factor homolog (zebrafish)                                         | <i>Fibin</i>                                           | -2,5865649 | 3,85E-05   |
| PHD finger protein 10                                                                 | <i>Phf10</i>                                           | -2,5859632 | 1,28E-07   |
| Interleukin 1 receptor, type I                                                        | <i>Il1r1</i>                                           | -2,582533  | 1,73E-05   |
| Radical S-adenosyl methionine domain containing 2                                     | <i>Rsad2</i>                                           | -2,5825223 | 6,79E-05   |
| Junction-mediating and regulatory protein                                             | <i>Jmy</i>                                             | -2,5820926 | 0,00069019 |
| Desmin                                                                                | <i>Des</i>                                             | -2,5784903 | 1,27E-05   |
| CDK2 associated, cullin domain 1                                                      | <i>Cacul1</i>                                          | -2,5777279 | 1,93E-06   |
| Interferon gamma inducible protein 47                                                 | <i>Ifi47</i>                                           | -2,5749327 | 7,69E-07   |
| Interleukin 6                                                                         | <i>Il6</i>                                             | -2,569988  | 2,81E-05   |
| Lysyl oxidase-like 4                                                                  | <i>Loxl4</i>                                           | -2,5675619 | 3,02E-05   |
| Zinc finger protein 7                                                                 | <i>Zfp7</i>                                            | -2,5668639 | 0,00016932 |
| Chromatin licensing and DNA replication factor 1                                      | <i>Cdt1</i>                                            | -2,566117  | 7,21E-07   |
| Small nucleolar RNA host gene 5                                                       | <i>Snhg5</i>                                           | -2,5624974 | 1,07E-07   |
| Nuclear import 7 homolog (S. Cerevisiae)                                              | <i>Nip7</i>                                            | -2,5567988 | 1,41E-07   |
| Cadherin 11 pseudogene /// cadherin 11 pseudogene /// cadherin-11-like                | 2610005L07Rik ///<br>6820431F20Rik ///<br>LOC101056094 | -2,5547309 | 4,43E-05   |
| Hydroxysteroid (17-beta) dehydrogenase 11                                             | <i>Hsd17b11</i>                                        | -2,5538639 | 1,11E-05   |

|                                                                                              |                              |            |            |
|----------------------------------------------------------------------------------------------|------------------------------|------------|------------|
| Fibroblast growth factor binding protein 1                                                   | <i>Fgfbp1</i>                | -2,5533545 | 6,31E-05   |
| Phosphoserine phosphatase                                                                    | <i>Psph</i>                  | -2,5391372 | 3,11E-07   |
| 4-aminobutyrate aminotransferase                                                             | <i>Abat</i>                  | -2,5333424 | 1,90E-05   |
| Prolyl-trna synthetase (mitochondrial)(putative)                                             | <i>Pars2</i>                 | -2,5327579 | 2,32E-06   |
| Melanoma cell adhesion molecule                                                              | <i>Mcama</i>                 | -2,5320075 | 7,15E-05   |
| Homeobox B7 /// homeobox B8                                                                  | <i>Hoxb7 /// Hoxb8</i>       | -2,5304344 | 0,00123002 |
| RNA binding motif protein, X linked-like-1                                                   | <i>Rbmxl1</i>                | -2,5286595 | 2,26E-07   |
| Glucuronyl C5-epimerase                                                                      | <i>Glce</i>                  | -2,525659  | 6,20E-07   |
| Cleavage and polyadenylation specific factor 2                                               | <i>Cpsf2</i>                 | -2,5253337 | 9,27E-07   |
| Predicted gene 2808 /// tubby like protein 4                                                 | <i>Gm2808 /// Tulp4</i>      | -2,5241583 | 6,78E-06   |
| Zinc and ring finger 1                                                                       | <i>Znrf1</i>                 | -2,5220784 | 5,57E-05   |
| Epidermal growth factor-containing fibulin-like extracellular matrix protein 2               | <i>Efemp2</i>                | -2,5215573 | 3,90E-07   |
| Mitochondrial ribosomal protein S31                                                          | <i>Mrps31</i>                | -2,5199215 | 7,19E-07   |
| Hook homolog 2 (Drosophila)                                                                  | <i>Hook2</i>                 | -2,5180781 | 1,39E-06   |
| Apurinic/apyrimidinic endonuclease 1                                                         | <i>Apex1</i>                 | -2,5155258 | 1,88E-07   |
| Sorting nexin 18                                                                             | <i>Snx18</i>                 | -2,5147908 | 2,51E-06   |
| Nuclear factor I/X                                                                           | <i>Nfix</i>                  | -2,5141724 | 5,21E-06   |
| RIKEN cdna A430005L14 gene                                                                   | <i>A430005L14Rik</i>         | -2,513365  | 9,34E-06   |
| Fibrillin 1                                                                                  | <i>Fbn1</i>                  | -2,5128841 | 1,58E-05   |
| ST3 beta-galactoside alpha-2,3-sialyltransferase 2                                           | <i>St3gal2</i>               | -2,5122867 | 5,15E-07   |
| Major facilitator superfamily domain containing 6                                            | <i>Mfsd6</i>                 | -2,5106805 | 8,89E-06   |
| RAB20, member RAS oncogene family                                                            | <i>Rab20</i>                 | -2,5103257 | 1,77E-05   |
| TGFB-induced factor homeobox 1                                                               | <i>Tgif1</i>                 | -2,5070981 | 1,69E-06   |
| DNA-damage regulated autophagy modulator 1                                                   | <i>Dram1</i>                 | -2,4995019 | 7,39E-07   |
| UDP-glcnac:betagal beta-1,3-N-acetylglucosaminyltransferase 3                                | <i>B3gnt3</i>                | -2,4944699 | 5,50E-05   |
| Glycerophosphodiester phosphodiesterase domain containing 1                                  | <i>Gdpd1</i>                 | -2,4917834 | 5,33E-06   |
| TNFRSF1A-associated via death domain                                                         | <i>Tradd</i>                 | -2,4890379 | 4,75E-05   |
| Calcium homeostasis modulator 2                                                              | <i>Calhm2</i>                | -2,4863059 | 1,73E-06   |
| Niemann-Pick type C2                                                                         | <i>Npc2</i>                  | -2,4859404 | 6,09E-07   |
| Cytochrome c oxidase assembly factor 7                                                       | <i>Coa7</i>                  | -2,4820785 | 8,70E-07   |
| OTU domain containing 4                                                                      | <i>Otud4</i>                 | -2,4807824 | 5,26E-07   |
| Cadherin 11 pseudogene                                                                       | <i>6820431F20Rik</i>         | -2,4756552 | 9,81E-05   |
| Bassoon                                                                                      | <i>Bsn</i>                   | -2,4741726 | 0,00073603 |
| RAB8B, member RAS oncogene family                                                            | <i>Rab8b</i>                 | -2,4729647 | 2,27E-06   |
| Tubulin, beta 2a, pseudogene 2 /// tubulin, beta 2B class IIB                                | <i>Tubb2a-ps2 /// Tubb2b</i> | -2,4726169 | 3,31E-05   |
| Gamma-glutamylamine cyclotransferase                                                         | <i>Ggact</i>                 | -2,4622574 | 6,61E-05   |
| Arginine/serine rich protein 1                                                               | <i>Rsrp1</i>                 | -2,4567834 | 7,24E-06   |
| Laminin, alpha 2                                                                             | <i>Lama2</i>                 | -2,4560485 | 3,04E-05   |
| Nuclear factor of activated T cells, cytoplasmic, calcineurin dependent 3                    | <i>Nfatc3</i>                | -2,4551426 | 1,14E-05   |
| Chac, cation transport regulator 1                                                           | <i>Chac1</i>                 | -2,4536164 | 5,05E-07   |
| Excision repair cross-complementing rodent repair deficiency, complementation group 6 like 2 | <i>Ercc6l2</i>               | -2,4491792 | 2,78E-05   |

|                                                                                           |                          |            |            |
|-------------------------------------------------------------------------------------------|--------------------------|------------|------------|
| H19, imprinted maternally expressed transcript ///<br>microRNA 675                        | <i>H19 /// Mir675</i>    | -2,4420521 | 1,19E-05   |
| Pyruvate dehydrogenase kinase, isoenzyme 3                                                | <i>Pdk3</i>              | -2,4390925 | 3,07E-06   |
| Integrin alpha 3                                                                          | <i>Itga3</i>             | -2,4335973 | 0,00044514 |
| Thioredoxin interacting protein                                                           | <i>Txnip</i>             | -2,4317654 | 1,25E-06   |
| IMP3, U3 small nucleolar ribonucleoprotein, homolog<br>(yeast)                            | <i>Imp3</i>              | -2,429415  | 9,51E-07   |
| Gap junction protein, beta 4                                                              | <i>Gjb4</i>              | -2,4288556 | 1,72E-06   |
| Rho GDP dissociation inhibitor (GDI) gamma                                                | <i>Arhgdig</i>           | -2,4244167 | 9,86E-07   |
| Collagen, type V, alpha 1                                                                 | <i>Col5a1</i>            | -2,4231274 | 6,26E-07   |
| Amyloid beta (A4) precursor-like protein 1                                                | <i>Aplp1</i>             | -2,4204372 | 0,00031039 |
| Podoplanin                                                                                | <i>Pdpn</i>              | -2,4166932 | 6,79E-07   |
| SR-related CTD-associated factor 8                                                        | <i>Scaf8</i>             | -2,4125178 | 5,71E-06   |
| Collagen, type I, alpha 2                                                                 | <i>Col1a2</i>            | -2,4124913 | 7,92E-06   |
| Rho gtpase activating protein 24                                                          | <i>Arhgap24</i>          | -2,4118653 | 0,00012471 |
| C-type lectin domain family 4, member e                                                   | <i>Clec4e</i>            | -2,4103024 | 4,81E-06   |
| Predicted pseudogene 4024 /// transmembrane emp24-<br>like trafficking protein 10 (yeast) | <i>Gm4024 /// Tmed10</i> | -2,407312  | 1,82E-05   |
| RAD9 homolog A                                                                            | <i>Rad9a</i>             | -2,4000829 | 7,21E-07   |
| Small nucleolar RNA host gene 8                                                           | <i>Snhg8</i>             | -2,3941895 | 4,81E-07   |
| Cyclin-dependent kinase 2 interacting protein                                             | <i>Cinp</i>              | -2,3929391 | 2,06E-07   |
| Eukaryotic translation initiation factor 4E binding<br>protein 1                          | <i>Eif4ebp1</i>          | -2,3915195 | 1,40E-06   |
| NLR family member X1                                                                      | <i>NlrX1</i>             | -2,3898469 | 1,64E-05   |
| Pellino 2                                                                                 | <i>Peli2</i>             | -2,3826465 | 7,22E-06   |
| Annexin A8                                                                                | <i>Anxa8</i>             | -2,3773154 | 2,02E-06   |
| UDP-N-acetyl-alpha-D-galactosamine: polypeptide N-<br>acetylgalactosaminyltransferase 7   | <i>Galnt7</i>            | -2,3744862 | 9,22E-06   |
| Guanine nucleotide binding protein (G protein),<br>gamma 11                               | <i>Gng11</i>             | -2,3730811 | 5,71E-06   |
| Carbonyl reductase 3                                                                      | <i>Cbr3</i>              | -2,3716975 | 1,18E-05   |
| Tripartite motif-containing 16                                                            | <i>Trim16</i>            | -2,3700099 | 0,0003993  |
| Interferon induced transmembrane protein 10                                               | <i>Ifitm10</i>           | -2,3683657 | 1,09E-05   |
| RAB29, member RAS oncogene family                                                         | <i>Rab29</i>             | -2,3611645 | 1,74E-05   |
| Biglycan                                                                                  | <i>Bgn</i>               | -2,36015   | 2,47E-06   |
| Ras association (ralgds/AF-6) domain family member 5                                      | <i>Rassf5</i>            | -2,3598857 | 4,70E-05   |
| Exoribonuclease 1                                                                         | <i>Eri1</i>              | -2,3581132 | 5,25E-06   |
| SWA-70 protein                                                                            | <i>Swap70</i>            | -2,3573247 | 0,00010184 |
| ATP5S-like                                                                                | <i>Atp5sl</i>            | -2,3560865 | 9,95E-06   |
| Fatty acid desaturase 1                                                                   | <i>Fads1</i>             | -2,3482547 | 1,18E-06   |
| ATPase family, AAA domain containing 3A                                                   | <i>Atad3a</i>            | -2,3453573 | 3,79E-06   |
| CCAAT/enhancer binding protein (C/EBP), beta                                              | <i>Cebpb</i>             | -2,3441637 | 3,72E-06   |
| Disabled 2 interacting protein                                                            | <i>Dab2ip</i>            | -2,3383266 | 3,05E-06   |
| Cap methyltransferase 2                                                                   | <i>Cmtr2</i>             | -2,3335218 | 0,0014371  |
| Phosphogluconate dehydrogenase                                                            | <i>Pgd</i>               | -2,3295004 | 1,21E-05   |
| Family with sequence similarity 69, member B                                              | <i>Fam69b</i>            | -2,3261738 | 2,19E-06   |
| RAR-related orphan receptor alpha                                                         | <i>Rora</i>              | -2,3216209 | 1,19E-05   |

|                                                                              |                            |            |            |
|------------------------------------------------------------------------------|----------------------------|------------|------------|
| MARVEL (membrane-associating) domain containing 1                            | <i>Marveld1</i>            | -2,3206383 | 1,99E-06   |
| Late cornified envelope 1I                                                   | <i>Lce1i</i>               | -2,3200705 | 0,00043013 |
| Interferon induced transmembrane protein 6                                   | <i>Ifitm6</i>              | -2,3194967 | 8,65E-06   |
| TSC22 domain family, member 3                                                | <i>Tsc22d3</i>             | -2,3170017 | 3,76E-05   |
| RCE1 homolog, prenyl protein peptidase (S. Cerevisiae)                       | <i>Rce1</i>                | -2,315945  | 2,91E-06   |
| Cdna sequence U90926                                                         | <i>U90926</i>              | -2,3149534 | 0,00059321 |
| Latrophilin 1                                                                | <i>Lphn1</i>               | -2,3122615 | 8,09E-05   |
| Complement component 2 (within H-2S)                                         | <i>C2</i>                  | -2,3103564 | 4,93E-06   |
| DAZ interacting protein 1                                                    | <i>Dzip1</i>               | -2,3092763 | 0,00013925 |
| KTI12 homolog, chromatin associated (S. Cerevisiae)                          | <i>Kti12</i>               | -2,3075359 | 5,77E-06   |
| Mitogen-activated protein kinase 12                                          | <i>Mapk12</i>              | -2,3064229 | 1,63E-05   |
| N-acylsphingosine amidohydrolase 2                                           | <i>Asah2</i>               | -2,3048493 | 2,31E-05   |
| Phosphoserine aminotransferase 1                                             | <i>Psat1</i>               | -2,3043242 | 7,08E-06   |
| Androgen receptor                                                            | <i>Ar</i>                  | -2,2931722 | 0,00021087 |
| Breast cancer metastasis-suppressor 1                                        | <i>Brms1</i>               | -2,2907519 | 2,22E-05   |
| Cullin 7                                                                     | <i>Cul7</i>                | -2,2888134 | 1,11E-05   |
| RAN guanine nucleotide release factor                                        | <i>Rangrf</i>              | -2,2886087 | 1,34E-06   |
| Ajuba LIM protein                                                            | <i>Ajuba</i>               | -2,2884952 | 1,52E-06   |
| Cathepsin H                                                                  | <i>Ctsh</i>                | -2,2866001 | 2,07E-06   |
| Dynein light chain Tctex-type 1F                                             | <i>Dynlt1f</i>             | -2,278813  | 1,39E-05   |
| Seven in absentia 1A                                                         | <i>Siah1a</i>              | -2,2758438 | 3,70E-06   |
| Ras homolog enriched in brain like 1                                         | <i>Rhebl1</i>              | -2,2756448 | 4,36E-06   |
| Ubiquitin A-52 residue ribosomal protein fusion product 1 pseudogene         | <i>Gm11517</i>             | -2,2748756 | 4,70E-06   |
| Myelocytomatosis oncogene                                                    | <i>Myc</i>                 | -2,2714558 | 9,73E-06   |
| Interferon (alpha and beta) receptor 2                                       | <i>Ifnar2</i>              | -2,2711201 | 4,77E-07   |
| Insulin-like growth factor binding protein 2                                 | <i>Igfbp2</i>              | -2,2679605 | 8,26E-05   |
| Interferon activated gene 204                                                | <i>Ifi204</i>              | -2,2622831 | 0,00284675 |
| Branched chain aminotransferase 1, cytosolic                                 | <i>Bcat1</i>               | -2,261935  | 4,06E-06   |
| Palladin, cytoskeletal associated protein                                    | <i>Palld</i>               | -2,2571822 | 2,48E-06   |
| Nicotinamide N-methyltransferase                                             | <i>Nnmt</i>                | -2,2568981 | 1,56E-05   |
| Wilms tumour 1-associating protein                                           | <i>Wtap</i>                | -2,2561245 | 1,55E-06   |
| Retinoblastoma binding protein 6                                             | <i>Rbbp6</i>               | -2,2464027 | 7,10E-05   |
| Family with sequence similarity 20, member C                                 | <i>Fam20c</i>              | -2,2462234 | 8,26E-05   |
| Delta-like 1 (Drosophila)                                                    | <i>Dll1</i>                | -2,2455847 | 1,85E-06   |
| Zinc finger protein 568                                                      | <i>Zfp568</i>              | -2,2450826 | 0,00209686 |
| Scleraxis                                                                    | <i>Scx</i>                 | -2,2428582 | 4,57E-05   |
| Tubulointerstitial nephritis antigen-like 1                                  | <i>Tinagl1</i>             | -2,2417629 | 0,0002533  |
| Dnaj (Hsp40) homolog, subfamily C, member 11                                 | <i>Dnajc11</i>             | -2,2388193 | 8,40E-07   |
| Zinc finger protein 91 /// Zfp91-Cntf readthrough transcript (NMD candidate) | <i>Zfp91 /// Zfp91Cntf</i> | -2,2373494 | 0,00010288 |
| Family with sequence similarity 136, member A                                | <i>Fam136a</i>             | -2,2367972 | 1,07E-06   |
| Post-GPI attachment to proteins 2                                            | <i>Pgap2</i>               | -2,2353238 | 4,04E-06   |
| Trophoblast glycoprotein                                                     | <i>Tpbp</i>                | -2,2299448 | 7,24E-06   |

|                                                                                                           |                      |            |            |
|-----------------------------------------------------------------------------------------------------------|----------------------|------------|------------|
| Solute carrier family 3 (activators of dibasic and neutral amino acid transport), member 2                | <i>Slc3a2</i>        | -2,2282425 | 6,64E-07   |
| STT3, subunit of the oligosaccharyltransferase complex, homolog A (S. Cerevisiae)                         | <i>Stt3a</i>         | -2,2264849 | 0,00074953 |
| Influenza virus NS1A binding protein                                                                      | <i>Ivns1abp</i>      | -2,2262983 | 8,64E-06   |
| Deoxyhypusine synthase                                                                                    | <i>Dhps</i>          | -2,2254598 | 2,29E-05   |
| Cyclin-dependent kinase 6                                                                                 | <i>Cdk6</i>          | -2,2213463 | 0,00070081 |
| YTH domain family 1                                                                                       | <i>Ythdf1</i>        | -2,2185356 | 5,51E-06   |
| SMEK homolog 1, suppressor of mek1 (Dictyostelium)                                                        | <i>Smek1</i>         | -2,2177674 | 2,08E-06   |
| Centromere protein V                                                                                      | <i>Cenpv</i>         | -2,2175872 | 4,85E-06   |
| Solute carrier family 29 (nucleoside transporters), member 1                                              | <i>Slc29a1</i>       | -2,2131474 | 2,79E-06   |
| DEAD (Asp-Glu-Ala-Asp) box polypeptide 18                                                                 | <i>Ddx18</i>         | -2,2127262 | 0,00011771 |
| Microfibrillar-associated protein 3                                                                       | <i>Mfap3</i>         | -2,2118992 | 1,72E-05   |
| TATA box binding protein (Tbp)-associated factor, RNA polymerase I, D                                     | <i>Taf1d</i>         | -2,2104737 | 0,00359967 |
| Crystallin, zeta (quinone reductase)-like 1                                                               | <i>Cryz1</i>         | -2,2088259 | 1,05E-06   |
| BAI1-associated protein 2-like 1                                                                          | <i>Baiap2l1</i>      | -2,2079877 | 1,73E-06   |
| G0/G1 switch gene 2                                                                                       | <i>G0s2</i>          | -2,2027006 | 3,18E-06   |
| ER lipid raft associated 1                                                                                | <i>Erlin1</i>        | -2,2008449 | 1,99E-06   |
| Poly (A) polymerase alpha                                                                                 | <i>Papola</i>        | -2,2000658 | 0,00298998 |
| Leucine rich repeat containing 16A                                                                        | <i>Lrrc16a</i>       | -2,1995341 | 2,33E-05   |
| Retinitis pigmentosa gtpase regulator                                                                     | <i>Rpgr</i>          | -2,1935775 | 5,86E-05   |
| Solute carrier family 25, member 33                                                                       | <i>Slc25a33</i>      | -2,1907789 | 4,88E-06   |
| UDP-Gal:betaglcnaac beta 1,4-galactosyltransferase, polypeptide 4                                         | <i>B4galt4</i>       | -2,1885944 | 2,59E-05   |
| SET domain containing 6                                                                                   | <i>Setd6</i>         | -2,1870104 | 1,17E-05   |
| Camello-like 1                                                                                            | <i>Cml1</i>          | -2,1863182 | 0,00010932 |
| General transcription factor IIA, 1-like                                                                  | <i>Gtf2a1l</i>       | -2,1861162 | 1,66E-05   |
| Tubulin, alpha 8                                                                                          | <i>Tuba8</i>         | -2,1845513 | 1,44E-05   |
| Pinin                                                                                                     | <i>Pnn</i>           | -2,1841531 | 9,73E-05   |
| TEA domain family member 2                                                                                | <i>Tead2</i>         | -2,1837944 | 1,31E-05   |
| G protein-coupled receptor 124                                                                            | <i>Gpr124</i>        | -2,1822874 | 2,08E-05   |
| Lysyl oxidase-like 1                                                                                      | <i>Loxl1</i>         | -2,180683  | 4,85E-05   |
| Proteasome (prosome, macropain) 26S subunit, non-atpase, 7                                                | <i>Psmd7</i>         | -2,180414  | 1,11E-06   |
| CD276 antigen                                                                                             | <i>Cd276</i>         | -2,1786606 | 0,00015038 |
| Expressed sequence AI837181                                                                               | <i>AI837181</i>      | -2,1784216 | 2,04E-05   |
| Activating transcription factor 4                                                                         | <i>Atf4</i>          | -2,1781216 | 7,26E-06   |
| Adenylate kinase isoenzyme 6 /// TAF9 RNA polymerase II, TATA box binding protein (TBP)-associated factor | <i>Ak6 /// Taf9</i>  | -2,1773115 | 1,55E-06   |
| TEA domain family member 4                                                                                | <i>Tead4</i>         | -2,1773112 | 6,69E-06   |
| Transcription factor 7 like 1 (T cell specific, HMG box)                                                  | <i>Tcf7l1</i>        | -2,1747824 | 0,00059926 |
| Cytochrome c oxidase subunit vib polypeptide 2                                                            | <i>Cox6b2</i>        | -2,1722717 | 0,00036428 |
| RIKEN cdna 4921524J17 gene                                                                                | <i>4921524J17Rik</i> | -2,1716119 | 0,0003008  |
| Cyclin J                                                                                                  | <i>Ccnj</i>          | -2,1672591 | 0,00026232 |
| Odd-skipped related 1 (Drosophila)                                                                        | <i>Osr1</i>          | -2,1671262 | 0,00011683 |

|                                                                                        |                                  |            |            |
|----------------------------------------------------------------------------------------|----------------------------------|------------|------------|
| RIKEN cdna 1700017B05 gene                                                             | <i>1700017B05Rik</i>             | -2,1652431 | 7,70E-06   |
| Mannan-binding lectin serine peptidase 1                                               | <i>Masp1</i>                     | -2,1641861 | 1,37E-06   |
| Solute carrier family 2 (facilitated glucose transporter), member 1                    | <i>Slc2a1</i>                    | -2,1626391 | 1,18E-06   |
| A disintegrin and metallopeptidase domain 9 (meltrin gamma)                            | <i>Adam9</i>                     | -2,1611491 | 4,12E-05   |
| Alpha glucosidase 2 alpha neutral subunit                                              | <i>Ganab</i>                     | -2,1602599 | 4,00E-06   |
| Zinc finger protein 131                                                                | <i>Zfp131</i>                    | -2,1582565 | 1,15E-05   |
| Family with sequence similarity 60, member A                                           | <i>Fam60a</i>                    | -2,1574236 | 4,01E-06   |
| Membrane-associated ring finger (C3HC4) 5                                              | <i>III.05</i>                    | -2,1572342 | 7,15E-07   |
| Zinc finger protein 566                                                                | <i>Zfp566</i>                    | -2,1570831 | 1,57E-05   |
| Endoplasmic reticulum metallopeptidase 1                                               | <i>Ermp1</i>                     | -2,1549717 | 1,02E-05   |
| Coagulation factor II (thrombin) receptor                                              | <i>F2r</i>                       | -2,1548038 | 1,98E-05   |
| Camp responsive element binding protein 3-like 1                                       | <i>Creb3l1</i>                   | -2,153368  | 1,60E-05   |
| Sema domain, immunoglobulin domain (Ig), short basic domain, secreted, (semaphorin) 3C | <i>Sema3c</i>                    | -2,1533006 | 0,00061747 |
| Membrane-bound transcription factor peptidase, site 1                                  | <i>Mbtps1</i>                    | -2,1532607 | 9,83E-07   |
| Spermatogenesis associated 13                                                          | <i>Spata13</i>                   | -2,1529286 | 1,05E-05   |
| Mannosidase, beta A, lysosomal                                                         | <i>Manba</i>                     | -2,1527592 | 0,0012599  |
| Microtubule-associated protein 1 light chain 3 beta                                    | <i>Map1lc3b</i>                  | -2,1522459 | 9,96E-07   |
| Feminization 1 homolog b (C. Elegans)                                                  | <i>Fem1b</i>                     | -2,1514226 | 0,00013925 |
| Barrier to autointegration factor 1                                                    | <i>Banf1</i>                     | -2,1499748 | 1,71E-06   |
| Astrotactin 1                                                                          | <i>Astn1</i>                     | -2,1435955 | 9,95E-05   |
| Protein phosphatase 1, regulatory (inhibitor) subunit 14c                              | <i>Ppp1r14c</i>                  | -2,142892  | 6,57E-05   |
| Latent transforming growth factor beta binding protein 3                               | <i>Ltbp3</i>                     | -2,1425737 | 1,39E-06   |
| Tousled-like kinase 2 (Arabidopsis)                                                    | <i>Tlk2</i>                      | -2,1423213 | 2,12E-05   |
| YY1 transcription factor                                                               | <i>Yy1</i>                       | -2,1406352 | 4,17E-06   |
| Interferon gamma induced gtpase                                                        | <i>Igtp</i>                      | -2,1401186 | 0,00020653 |
| Death-associated protein kinase 2                                                      | <i>Dapk2</i>                     | -2,1383017 | 3,43E-06   |
| Predicted gene 5806 /// thymine DNA glycosylase pseudogene /// thymine DNA glycosylase | <i>Gm5806 /// Gm9855 /// Tdg</i> | -2,1381554 | 1,92E-05   |
| Glutathione S-transferase, alpha 2 (Yc2)                                               | <i>Gsta2</i>                     | -2,1373803 | 0,00014204 |
| Cirrhosis, autosomal recessive 1A (human)                                              | <i>Cirh1a</i>                    | -2,1370915 | 1,56E-06   |
| RIKEN cdna 1190005I06 gene                                                             | <i>1190005I06Rik</i>             | -2,1364077 | 1,01E-05   |
| Caspase 7                                                                              | <i>Casp7</i>                     | -2,1349297 | 8,65E-06   |
| Leptin receptor overlapping transcript-like 1                                          | <i>Leprotl1</i>                  | -2,1290083 | 5,19E-06   |
| N-acylsphingosine amidohydrolase 1                                                     | <i>Asah1</i>                     | -2,1289917 | 3,52E-06   |
| RIKEN cdna 0610012G03 gene                                                             | <i>0610012G03Rik</i>             | -2,1277981 | 4,95E-05   |
| Golgi associated, gamma adaptin ear containing, ARF binding protein 2                  | <i>Gga2</i>                      | -2,1243881 | 1,96E-06   |
| Zinc finger protein OZF-like                                                           | <i>LOC102643033</i>              | -2,1234813 | 0,0030023  |
| RNA terminal phosphate cyclase-like 1                                                  | <i>Rcl1</i>                      | -2,1196073 | 5,19E-07   |
| Coiled-coil domain containing 86                                                       | <i>Ccdc86</i>                    | -2,1152319 | 2,63E-05   |
| Epithelial splicing regulatory protein 2                                               | <i>Esrp2</i>                     | -2,1147001 | 0,00498451 |
| Zinc finger protein 639                                                                | <i>Zfp639</i>                    | -2,1102885 | 6,20E-07   |

|                                                          |                                        |            |            |
|----------------------------------------------------------|----------------------------------------|------------|------------|
| Rho gtpase activating protein 5                          | <i>Arhgap5</i>                         | -2,1097987 | 1,88E-05   |
| Diacylglycerol O-acyltransferase 2                       | <i>Dgat2</i>                           | -2,1091764 | 2,60E-05   |
| Synaptotagmin-like 2                                     | <i>Sytl2</i>                           | -2,1069587 | 3,14E-05   |
| Neuropilin 2                                             | <i>Nrp2</i>                            | -2,1066985 | 6,26E-05   |
| Isovaleryl coenzyme A dehydrogenase                      | <i>Ivd</i>                             | -2,1044897 | 1,72E-05   |
| Coiled-coil domain containing 186                        | <i>Ccdc186</i>                         | -2,1037913 | 1,50E-05   |
| Epiregulin                                               | <i>Ereg</i>                            | -2,1017689 | 5,72E-05   |
| Interleukin 4 receptor, alpha                            | <i>Il4ra</i>                           | -2,099489  | 6,63E-06   |
| Tubulin polymerization-promoting protein family member 3 | <i>Tppp3</i>                           | -2,0989606 | 9,72E-05   |
| Metastasis associated 1                                  | <i>Mta1</i>                            | -2,0981072 | 2,63E-05   |
| Ribonuclease T2A /// ribonuclease T2B                    | <i>Rnaset2a</i> ///<br><i>Rnaset2b</i> | -2,0965163 | 3,42E-05   |
| Protein C receptor, endothelial                          | <i>Procr</i>                           | -2,0950723 | 1,13E-05   |
| Purine rich element binding protein B                    | <i>Purb</i>                            | -2,0928686 | 4,32E-05   |
| Toll-like receptor 3                                     | <i>Tlr3</i>                            | -2,092708  | 0,00012199 |
| Caspase 3                                                | <i>Casp3</i>                           | -2,0926138 | 5,07E-06   |
| Regulator of chromosome condensation 2                   | <i>Rcc2</i>                            | -2,0912309 | 3,87E-06   |
| Mannoside acetylglucosaminyltransferase 4, isoenzyme B   | <i>Mgat4b</i>                          | -2,0903379 | 1,28E-05   |
| Prolylcarboxypeptidase (angiotensinase C)                | <i>Prcp</i>                            | -2,0876197 | 3,59E-05   |
| Chemokine (C-C motif) ligand 25                          | <i>Ccl25</i>                           | -2,0852887 | 9,82E-06   |
| Histocompatibility 2, Q region locus 4 ///               | <i>H2-Q4</i> /// <i>H2-Q6</i> ///      | -2,0841086 | 1,67E-05   |
| histocompatibility 2, Q region locus 6 ///               | <i>H2-Q8</i> ///                       |            |            |
| histocompatibility 2, Q region locus 8 ///               | <i>LOC68395</i>                        |            |            |
| histocompatibility 2, Q region locus 6-like              |                                        |            |            |
| Frequently rearranged in advanced T cell lymphomas 2     | <i>Frat2</i>                           | -2,0811141 | 1,31E-05   |
| Ezrin                                                    | <i>Ezr</i>                             | -2,0799211 | 3,16E-06   |
| Transforming growth factor alpha                         | <i>Tgfa</i>                            | -2,0731377 | 0,00129175 |
| Abhydrolase domain containing 5                          | <i>Abhd5</i>                           | -2,0729977 | 8,45E-07   |
| Notch 3                                                  | <i>Notch3</i>                          | -2,0721406 | 0,00015064 |
| Glutamate-rich WD repeat containing 1                    | <i>Grwd1</i>                           | -2,0707029 | 1,27E-05   |
| Zinc finger protein 318                                  | <i>Zfp318</i>                          | -2,0689384 | 0,00086502 |
| Rosbin, round spermatid basic protein 1                  | <i>Rsbm1</i>                           | -2,0679548 | 3,40E-06   |
| Inhibitor of Bruton agammaglobulinemia tyrosine kinase   | <i>Ibtk</i>                            | -2,0645838 | 0,00175189 |
| Glutathione S-transferase omega 1                        | <i>Gsto1</i>                           | -2,0618304 | 5,42E-06   |
| Suppressor of variegation 4-20 homolog 1 (Drosophila)    | <i>Suv420h1</i>                        | -2,0611595 | 1,50E-05   |
| R-spondin homolog (Xenopus laevis)                       | <i>Rspo1</i>                           | -2,0607306 | 0,00156369 |
| Dipeptidylpeptidase 3                                    | <i>Dpp3</i>                            | -2,0587912 | 3,85E-06   |
| Transforming growth factor, beta 3                       | <i>Tgfb3</i>                           | -2,0558948 | 9,73E-06   |
| Alanyl-trna synthetase                                   | <i>Aars</i>                            | -2,0548343 | 1,47E-05   |
| Eukaryotic translation initiation factor 3, subunit A    | <i>Eif3a</i>                           | -2,0544919 | 0,00013829 |
| Exocyst complex component 8                              | <i>Exoc8</i>                           | -2,0542678 | 1,22E-05   |
| Kelch-like 24                                            | <i>Klhl24</i>                          | -2,0537105 | 0,00146583 |
| Zinc finger homeobox 3                                   | <i>Zfx3</i>                            | -2,0534941 | 0,00010462 |
| RNA binding motif protein 43                             | <i>Rbm43</i>                           | -2,0533033 | 0,00212817 |

|                                                                                     |                          |            |            |
|-------------------------------------------------------------------------------------|--------------------------|------------|------------|
| Hypoxia inducible factor 1, alpha subunit                                           | <i>Hif1a</i>             | -2,0511216 | 0,00035895 |
| Transmembrane protein 123                                                           | <i>Tmem123</i>           | -2,050726  | 0,00018567 |
| Lysophosphatidylcholine acyltransferase 3                                           | <i>Lpcat3</i>            | -2,0506452 | 2,04E-06   |
| Male-specific lethal 2 homolog (Drosophila)                                         | <i>Msl2</i>              | -2,0500997 | 2,40E-05   |
| Phospholipase A2, group XV                                                          | <i>Pla2g15</i>           | -2,0495195 | 3,06E-06   |
| Apolipoprotein B mRNA editing enzyme, catalytic polypeptide 1                       | <i>Apobec1</i>           | -2,0491901 | 1,26E-05   |
| Dicer 1, ribonuclease type III                                                      | <i>Dicer1</i>            | -2,0484952 | 6,28E-06   |
| Cysteine rich protein 2                                                             | <i>Crip2</i>             | -2,0483604 | 0,00017404 |
| Interferon-related developmental regulator 2                                        | <i>Ifrd2</i>             | -2,047077  | 8,49E-06   |
| Adenylate kinase 2                                                                  | <i>Ak2</i>               | -2,0422601 | 1,40E-05   |
| Signal sequence receptor, beta                                                      | <i>Ssr2</i>              | -2,0420662 | 2,06E-06   |
| Glutathione reductase                                                               | <i>Gsr</i>               | -2,038195  | 6,27E-05   |
| Phosphatase domain containing, paladin 1 /// thrombospondin 1                       | <i>Pald1 /// Thbs1</i>   | -2,0367303 | 5,73E-06   |
| Casein kinase 2, alpha prime polypeptide                                            | <i>Csnk2a2</i>           | -2,0364723 | 2,43E-06   |
| Protein tyrosine phosphatase-like (proline instead of catalytic arginine), member b | <i>Ptplb</i>             | -2,0353381 | 1,35E-05   |
| Syntrophin, basic 2                                                                 | <i>Sntb2</i>             | -2,0349153 | 0,00019014 |
| CTF8, chromosome transmission fidelity factor 8                                     | <i>Chtf8</i>             | -2,0345736 | 2,79E-06   |
| Zinc finger protein 148                                                             | <i>Zfp148</i>            | -2,0329677 | 2,39E-05   |
| Friend leukemia integration 1                                                       | <i>Fli1</i>              | -2,0320602 | 0,00018975 |
| Stearoyl-Coenzyme A desaturase 2                                                    | <i>Scd2</i>              | -2,0318512 | 0,00297705 |
| Cleavage stimulation factor, 3' pre-RNA subunit 2, tau                              | <i>Cstf2t</i>            | -2,031472  | 3,44E-06   |
| Nucleolar complex associated 2 homolog (S. Cerevisiae)                              | <i>Noc2l</i>             | -2,0258986 | 9,75E-06   |
| Cell division cycle associated 4                                                    | <i>Cdca4</i>             | -2,0257326 | 6,40E-05   |
| Mitochondrial ribosomal protein L20                                                 | <i>Mrpl20</i>            | -2,0256694 | 4,06E-06   |
| Nucleolar and coiled-body phosphoprotein 1                                          | <i>Nolc1</i>             | -2,0251417 | 6,50E-06   |
| Phosphatidylinositol glycan anchor biosynthesis, class K                            | <i>Pigk</i>              | -2,0237278 | 3,16E-06   |
| SET domain, bifurcated 1                                                            | <i>Setdb1</i>            | -2,0234214 | 1,17E-05   |
| Ubiquitin prenyltransferase domain containing 1                                     | <i>Ubiad1</i>            | -2,0206232 | 1,78E-05   |
| Polypyrimidine tract binding protein 3                                              | <i>Ptbp3</i>             | -2,0181206 | 0,00128012 |
| Nucleoplasmin 3 /// nucleoplasmin 3, pseudogene 1                                   | <i>Npm3 /// Npm3-ps1</i> | -2,0177671 | 0,00022773 |
| Transmembrane protein 50B                                                           | <i>Tmem50b</i>           | -2,0173611 | 3,70E-06   |
| Ubiquitin specific peptidase 1                                                      | <i>Usp1</i>              | -2,0163958 | 0,00025424 |
| Leprean 1                                                                           | <i>Lepre1</i>            | -2,0155617 | 1,76E-06   |
| High mobility group box 2                                                           | <i>Hmgb2</i>             | -2,0128018 | 7,86E-06   |
| Solute carrier family 1 (glutamate/neutral amino acid transporter), member 4        | <i>Slc1a4</i>            | -2,0111929 | 1,35E-05   |
| Adiponectin receptor 1                                                              | <i>Adipor1</i>           | -2,0103741 | 2,77E-05   |
| N(alpha)-acetyltransferase 30, nate catalytic subunit                               | <i>Naa30</i>             | -2,007971  | 0,00043271 |
| Transmembrane protein 11                                                            | <i>Tmem11</i>            | -2,0067936 | 8,55E-06   |
| Ubiquitin-conjugating enzyme E2J 2                                                  | <i>Ube2j2</i>            | -2,0058429 | 3,93E-06   |
| Son DNA binding protein                                                             | <i>Son</i>               | -2,0050959 | 2,86E-05   |
| Vacuolar protein sorting 37A (yeast)                                                | <i>Vps37a</i>            | -2,0042718 | 2,43E-05   |



|                                                                   |                      |            |            |
|-------------------------------------------------------------------|----------------------|------------|------------|
| Transmembrane protein 161A                                        | <i>Tmem161a</i>      | -2,0032236 | 1,47E-06   |
| RIKEN cdna 1700019G17 gene                                        | <i>1700019G17Rik</i> | -2,0022217 | 9,88E-05   |
| Predicted gene 1976                                               | <i>Gm1976</i>        | -2,0017988 | 0,00040135 |
| Serine carboxypeptidase 1                                         | <i>Scpep1</i>        | -2,0014988 | 6,03E-05   |
| Glutathione transferase zeta 1 (maleylacetoacetate isomerase)     | <i>Gstz1</i>         | -2,0000087 | 0,00025625 |
| Cerebral cavernous malformation 2                                 | <i>Ccm2</i>          | -1,998478  | 1,57E-05   |
| Phosphatidylinositol transfer protein, membrane-associated 1      | <i>Pitpnm1</i>       | -1,9978405 | 1,09E-05   |
| Purinergic receptor P2X, ligand-gated ion channel, 3              | <i>P2rx3</i>         | -1,9969497 | 0,00059623 |
| Islet cell autoantigen 1                                          | <i>Ica1</i>          | -1,9962745 | 0,00089558 |
| Left right determination factor 1                                 | <i>Lefty1</i>        | -1,9960439 | 1,02E-05   |
| Gem (nuclear organelle) associated protein 7                      | <i>Gemin7</i>        | -1,9959682 | 5,50E-05   |
| 3-phosphoglycerate dehydrogenase                                  | <i>Phgdh</i>         | -1,9934173 | 2,82E-06   |
| Killer cell lectin-like receptor subfamily G, member 1            | <i>Klrg1</i>         | -1,9932304 | 6,74E-05   |
| RER1 retention in endoplasmic reticulum 1 homolog (S. Cerevisiae) | <i>Rer1</i>          | -1,9925884 | 4,36E-06   |
| T cell lymphoma invasion and metastasis 1                         | <i>Tiam1</i>         | -1,9920433 | 0,00048613 |
| Dual-specificity tyrosine-(Y)-phosphorylation regulated kinase 1a | <i>Dyrk1a</i>        | -1,9907922 | 2,88E-06   |
| Cytochrome b5 type B                                              | <i>Cyb5b</i>         | -1,9899438 | 1,96E-05   |
| Chromodomain helicase DNA binding protein 1                       | <i>Chd1</i>          | -1,9876171 | 4,45E-06   |
| Predicted gene 5595                                               | <i>Gm5595</i>        | -1,9871537 | 0,00049622 |
| Egl-9 family hypoxia-inducible factor 3                           | <i>Egln3</i>         | -1,9846993 | 0,00048245 |
| Listerin E3 ubiquitin protein ligase 1                            | <i>Ltn1</i>          | -1,981966  | 0,00141013 |
| CCR4 carbon catabolite repression 4-like (S. Cerevisiae)          | <i>Ccrn4l</i>        | -1,9806347 | 4,03E-05   |
| Chemokine (C-C motif) ligand 5                                    | <i>Ccl5</i>          | -1,9801157 | 8,77E-05   |
| RIKEN cdna 9430015G10 gene                                        | <i>9430015G10Rik</i> | -1,9795589 | 0,00027118 |
| Mastermind like 1 (Drosophila)                                    | <i>Maml1</i>         | -1,9788044 | 0,00014418 |
| Programmed cell death 4                                           | <i>Pdcd4</i>         | -1,9782017 | 4,07E-06   |
| Ephrin A1                                                         | <i>Efna1</i>         | -1,9775069 | 6,79E-06   |
| Dynein light chain LC8-type 2                                     | <i>Dynll2</i>        | -1,9773674 | 1,10E-05   |
| Bicaudal D homolog 1 (Drosophila)                                 | <i>Bicd1</i>         | -1,9773049 | 5,89E-05   |
| Mediator complex subunit 26                                       | <i>Med26</i>         | -1,9772637 | 3,62E-05   |
| Solute carrier family 25, member 37                               | <i>Slc25a37</i>      | -1,9771933 | 2,01E-05   |
| Solute carrier organic anion transporter family, member 1a5       | <i>Slco1a5</i>       | -1,9768397 | 2,05E-05   |
| Expressed sequence AW209491                                       | <i>AW209491</i>      | -1,9760025 | 1,90E-05   |
| Ribosomal protein L14                                             | <i>Rpl14</i>         | -1,9733875 | 2,51E-05   |
| RAD23a homolog (S. Cerevisiae)                                    | <i>Rad23a</i>        | -1,9727949 | 0,00025706 |
| Phospholipase C, delta 1                                          | <i>Plcd1</i>         | -1,9721871 | 1,75E-05   |
| Rho gtpase activating protein 29                                  | <i>Arhgap29</i>      | -1,9717006 | 0,00015709 |
| Survival motor neuron domain containing 1                         | <i>Smndc1</i>        | -1,9710302 | 9,76E-06   |
| Ephrin B2                                                         | <i>Efnb2</i>         | -1,9687752 | 2,18E-06   |
| Interleukin-1 receptor-associated kinase 1 binding protein 1      | <i>Irak1bp1</i>      | -1,967957  | 1,77E-05   |
| DEAD (Asp-Glu-Ala-Asp) box polypeptide 19b                        | <i>Ddx19b</i>        | -1,9675151 | 2,02E-05   |

|                                                                                                   |                 |            |            |
|---------------------------------------------------------------------------------------------------|-----------------|------------|------------|
| Sec61, alpha subunit 2 (S. Cerevisiae)                                                            | <i>Sec61a2</i>  | -1,9669509 | 0,00032787 |
| Immunity-related gtpase family M member 2                                                         | <i>Irgm2</i>    | -1,966839  | 0,00028602 |
| SWI/SNF related, matrix associated, actin dependent regulator of chromatin, subfamily e, member 1 | <i>Smarge1</i>  | -1,9660569 | 0,00012338 |
| Interleukin 1 receptor-like 1                                                                     | <i>Il1rl1</i>   | -1,9659781 | 2,29E-05   |
| Beta galactoside alpha 2,6 sialyltransferase 1                                                    | <i>St6gal1</i>  | -1,9647787 | 5,60E-06   |
| Interferon-related developmental regulator 1                                                      | <i>Ifrd1</i>    | -1,9612988 | 9,20E-06   |
| Ribosomal RNA processing 1 homolog B (S. Cerevisiae)                                              | <i>Rrp1b</i>    | -1,9612741 | 1,11E-05   |
| Mitochondrial ribosomal protein L50                                                               | <i>Mrpl50</i>   | -1,9599644 | 0,00014204 |
| FK506 binding protein 10                                                                          | <i>Fkbp10</i>   | -1,9583838 | 0,00050638 |
| UFM1-specific peptidase 1                                                                         | <i>Ufsp1</i>    | -1,9555194 | 3,25E-05   |
| Zinc finger protein 930                                                                           | <i>Zfp930</i>   | -1,9534159 | 0,00954367 |
| Zinc finger and BTB domain containing 12                                                          | <i>Zbtb12</i>   | -1,9526047 | 0,00050003 |
| Interferon (alpha and beta) receptor 1                                                            | <i>Ifnar1</i>   | -1,9523812 | 1,45E-05   |
| FK506 binding protein-like                                                                        | <i>Fkbp1</i>    | -1,9521554 | 1,41E-05   |
| TAF5-like RNA polymerase II, p300/CBP-associated factor (PCAF)-associated factor                  | <i>Taf5l</i>    | -1,9508759 | 6,78E-06   |
| Apolipoprotein B receptor                                                                         | <i>Apobr</i>    | -1,9507387 | 1,09E-05   |
| ATPase type 13A3                                                                                  | <i>Atp13a3</i>  | -1,9503173 | 5,97E-05   |
| Tankyrase, TRF1-interacting ankyrin-related ADP-ribose polymerase 2                               | <i>Tnks2</i>    | -1,9492552 | 3,65E-06   |
| Membrane-spanning 4-domains, subfamily A, member 4D                                               | <i>Ms4a4d</i>   | -1,948877  | 0,00012009 |
| Plexin D1                                                                                         | <i>Plxnd1</i>   | -1,9485929 | 9,82E-05   |
| Tripartite motif-containing 8                                                                     | <i>Trim8</i>    | -1,944568  | 1,51E-05   |
| Iroquois related homeobox 1 (Drosophila)                                                          | <i>Irx1</i>     | -1,9436566 | 7,59E-06   |
| Fc receptor, igg, alpha chain transporter                                                         | <i>Fcgrt</i>    | -1,9423897 | 9,21E-05   |
| Sperm autoantigenic protein 17                                                                    | <i>Spa17</i>    | -1,9405339 | 0,00047138 |
| NFKB activating protein-like                                                                      | <i>Nkapl</i>    | -1,9387444 | 7,91E-05   |
| WD repeat domain 20                                                                               | <i>Wdr20</i>    | -1,938121  | 6,26E-06   |
| 1-acylglycerol-3-phosphate O-acyltransferase 5 (lysophosphatidic acid acyltransferase, epsilon)   | <i>Agpat5</i>   | -1,9379353 | 0,00037774 |
| TRAF-interacting protein with forkhead-associated domain                                          | <i>Tifa</i>     | -1,937698  | 0,00166849 |
| SKI-like                                                                                          | <i>Skil</i>     | -1,9367273 | 3,10E-06   |
| Mitogen-activated protein kinase 11                                                               | <i>Mapk11</i>   | -1,9361098 | 0,0001196  |
| Poly(A) binding protein, cytoplasmic 4                                                            | <i>Pabpc4</i>   | -1,9352449 | 9,38E-06   |
| Membrane bound O-acyltransferase domain containing 1                                              | <i>Mboat1</i>   | -1,934377  | 3,15E-06   |
| Torsin A interacting protein 2                                                                    | <i>Tor1aip2</i> | -1,9336605 | 1,49E-05   |
| ATP-binding cassette, sub-family G (WHITE), member 1                                              | <i>Abcg1</i>    | -1,9333346 | 0,00018954 |
| NEDD4 binding protein 2-like 1                                                                    | <i>N4bp2l1</i>  | -1,9326119 | 0,0005183  |
| Syndecan 1                                                                                        | <i>Sdc1</i>     | -1,9299786 | 2,79E-06   |
| Like-glycosyltransferase                                                                          | <i>Large</i>    | -1,9291926 | 0,00056362 |
| Phosphatase and tensin homolog                                                                    | <i>Pten</i>     | -1,9282955 | 4,95E-05   |
| Human immunodeficiency virus type I enhancer binding protein 2                                    | <i>Hivep2</i>   | -1,9256705 | 6,35E-06   |

|                                                                                                                                                                                                                                                                                                                                   |                                                                                                                                                                  |            |            |
|-----------------------------------------------------------------------------------------------------------------------------------------------------------------------------------------------------------------------------------------------------------------------------------------------------------------------------------|------------------------------------------------------------------------------------------------------------------------------------------------------------------|------------|------------|
| Eukaryotic translation initiation factor 2, subunit 2 (beta)                                                                                                                                                                                                                                                                      | <i>Eif2s2</i>                                                                                                                                                    | -1,9256109 | 0,00313708 |
| RIKEN cdna 2310036O22 gene                                                                                                                                                                                                                                                                                                        | <i>2310036O22Rik</i>                                                                                                                                             | -1,9232018 | 8,02E-06   |
| Transmembrane protein 60                                                                                                                                                                                                                                                                                                          | <i>Tmem60</i>                                                                                                                                                    | -1,9217652 | 1,48E-05   |
| Dual specificity phosphatase 16                                                                                                                                                                                                                                                                                                   | <i>Dusp16</i>                                                                                                                                                    | -1,9209266 | 6,57E-06   |
| ATP-binding cassette, sub-family E (OABP), member 1                                                                                                                                                                                                                                                                               | <i>Abce1</i>                                                                                                                                                     | -1,9204339 | 1,49E-05   |
| Phosphodiesterase 10A                                                                                                                                                                                                                                                                                                             | <i>Pde10a</i>                                                                                                                                                    | -1,9201709 | 0,00137373 |
| Suppressor of fused homolog (Drosophila)                                                                                                                                                                                                                                                                                          | <i>Sufu</i>                                                                                                                                                      | -1,9200926 | 2,83E-05   |
| RAS p21 protein activator 3                                                                                                                                                                                                                                                                                                       | <i>Rasa3</i>                                                                                                                                                     | -1,9194502 | 3,70E-06   |
| Ras and Rab interactor 1                                                                                                                                                                                                                                                                                                          | <i>Rin1</i>                                                                                                                                                      | -1,9168035 | 1,96E-05   |
| WD repeat domain 43                                                                                                                                                                                                                                                                                                               | <i>Wdr43</i>                                                                                                                                                     | -1,9165637 | 9,05E-05   |
| Queueine trna-ribosyltransferase 1                                                                                                                                                                                                                                                                                                | <i>Qtrt1</i>                                                                                                                                                     | -1,9162744 | 1,73E-05   |
| Aldo-keto reductase family 1, member B3 (aldose reductase) /// Akr1b3 pseudogene                                                                                                                                                                                                                                                  | <i>Akr1b3 /// Gm6644</i>                                                                                                                                         | -1,9162606 | 1,23E-05   |
| Kruppel-like factor 13                                                                                                                                                                                                                                                                                                            | <i>Klf13</i>                                                                                                                                                     | -1,9151687 | 7,50E-05   |
| RIKEN cdna 2510039O18 gene                                                                                                                                                                                                                                                                                                        | <i>2510039O18Rik</i>                                                                                                                                             | -1,9143506 | 2,45E-05   |
| Cyclin L2                                                                                                                                                                                                                                                                                                                         | <i>Ccnl2</i>                                                                                                                                                     | -1,9138611 | 5,22E-05   |
| Predicted gene 2701 /// NADH dehydrogenase [ubiquinone] 1 beta subcomplex subunit 1-like                                                                                                                                                                                                                                          | <i>Gm2701 /// LOC102631912</i>                                                                                                                                   | -1,9130628 | 2,78E-05   |
| Bbsome interacting protein 1                                                                                                                                                                                                                                                                                                      | <i>Bbip1</i>                                                                                                                                                     | -1,912649  | 0,00025681 |
| Processing of precursor 4, ribonuclease P/MRP family, (S. Cerevisiae)                                                                                                                                                                                                                                                             | <i>Pop4</i>                                                                                                                                                      | -1,911846  | 2,72E-05   |
| CD40 antigen                                                                                                                                                                                                                                                                                                                      | <i>Cd40</i>                                                                                                                                                      | -1,9091836 | 0,00501436 |
| Soc-2 (suppressor of clear) homolog (C. Elegans)                                                                                                                                                                                                                                                                                  | <i>Shoc2</i>                                                                                                                                                     | -1,9061595 | 0,00538098 |
| Small nucleolar RNA host gene 6                                                                                                                                                                                                                                                                                                   | <i>Snhg6</i>                                                                                                                                                     | -1,90599   | 4,88E-06   |
| 3-phosphoglycerate dehydrogenase pseudogene /// 3-phosphoglycerate dehydrogenase                                                                                                                                                                                                                                                  | <i>Gm8096 /// Phgdh</i>                                                                                                                                          | -1,9058078 | 3,02E-06   |
| Collagen, type I, alpha 1                                                                                                                                                                                                                                                                                                         | <i>Col1a1</i>                                                                                                                                                    | -1,905485  | 8,22E-05   |
| Glycerol-3-phosphate acyltransferase, mitochondrial                                                                                                                                                                                                                                                                               | <i>Gpam</i>                                                                                                                                                      | -1,9046473 | 7,44E-06   |
| Phosphodiesterase 4D interacting protein (myomegalin)                                                                                                                                                                                                                                                                             | <i>Pde4dip</i>                                                                                                                                                   | -1,9042666 | 0,00091495 |
| ATP-binding cassette, sub-family C (CFTR/MRP), member 1                                                                                                                                                                                                                                                                           | <i>Abcc1</i>                                                                                                                                                     | -1,9032049 | 0,00576044 |
| Zinc finger protein 707                                                                                                                                                                                                                                                                                                           | <i>Zfp707</i>                                                                                                                                                    | -1,9026689 | 5,07E-05   |
| 2-oxoglutarate and iron-dependent oxygenase domain containing 3                                                                                                                                                                                                                                                                   | <i>Ogfd3</i>                                                                                                                                                     | -1,9023459 | 6,38E-05   |
| NADH dehydrogenase (ubiquinone) flavoprotein 1                                                                                                                                                                                                                                                                                    | <i>Ndufo1</i>                                                                                                                                                    | -1,9002117 | 2,21E-05   |
| Immediate early response 2                                                                                                                                                                                                                                                                                                        | <i>Ier2</i>                                                                                                                                                      | -1,8989391 | 0,00010286 |
| Lon peptidase 1, mitochondrial                                                                                                                                                                                                                                                                                                    | <i>Lonp1</i>                                                                                                                                                     | -1,89844   | 1,67E-05   |
| Histone cluster 1, H3a /// histone cluster 1, H3b /// histone cluster 1, H3c /// histone cluster 1, H3d /// histone cluster 1, H3e /// histone cluster 1, H3f /// histone cluster 1, H3g /// histone cluster 1, H3h /// histone cluster 1, H3i /// histone cluster 2, H3b /// histone cluster 2, H3c1 /// histone cluster 2, H3c2 | <i>Hist1h3a /// Hist1h3b /// Hist1h3c /// Hist1h3d /// Hist1h3e /// Hist1h3f /// Hist1h3g /// Hist1h3h /// Hist1h3i /// Hist2h3b /// Hist2h3c1 /// Hist2h3c2</i> | -1,8983715 | 0,00012003 |

|                                                                                             |                                      |            |            |
|---------------------------------------------------------------------------------------------|--------------------------------------|------------|------------|
| Atpase family, AAA domain containing 1                                                      | <i>Atad1</i>                         | -1,8963062 | 0,00032806 |
| Secretory carrier membrane protein 5                                                        | <i>Scamp5</i>                        | -1,8953707 | 6,89E-05   |
| Collagen, type VI, alpha 2                                                                  | <i>Col6a2</i>                        | -1,8952227 | 0,00162614 |
| NAD kinase                                                                                  | <i>Nadk</i>                          | -1,8948904 | 7,04E-06   |
| Ubiquitin specific peptidase 38                                                             | <i>Usp38</i>                         | -1,8948844 | 0,00010841 |
| Procollagen-lysine, 2-oxoglutarate 5-dioxygenase 1                                          | <i>Plod1</i>                         | -1,8947583 | 7,59E-06   |
| Bromodomain containing 7                                                                    | <i>Brd7</i>                          | -1,8943473 | 1,44E-05   |
| Glutaryl-Coenzyme A dehydrogenase                                                           | <i>Gcdh</i>                          | -1,8938528 | 7,84E-05   |
| DNA cross-link repair 1A, PSO2 homolog (S. Cerevisiae)                                      | <i>Dclre1a</i>                       | -1,8931896 | 0,00019256 |
| Ribonuclease H2, subunit C                                                                  | <i>Rnaseh2c</i>                      | -1,8922329 | 0,00017126 |
| Solute carrier family 25 (mitochondrial carrier, palmitoylcarnitine transporter), member 29 | <i>Slc25a29</i>                      | -1,8907505 | 2,60E-05   |
| Cleavage and polyadenylation specific factor 7                                              | <i>Cpsf7</i>                         | -1,8890977 | 6,19E-06   |
| Transcription factor AP-2, gamma                                                            | <i>Tfap2c</i>                        | -1,8887532 | 0,002959   |
| Cadherin 11 pseudogene                                                                      | <i>2610005L07Rik</i>                 | -1,8881062 | 0,00012082 |
| Multiple inositol polyphosphate histidine phosphatase 1                                     | <i>Minpp1</i>                        | -1,8880124 | 0,00021378 |
| Chloride channel 5                                                                          | <i>Clcn5</i>                         | -1,8862205 | 7,70E-06   |
| Dystroglycan 1                                                                              | <i>Dag1</i>                          | -1,8861204 | 1,61E-05   |
| Interactor of little elongation complex ELL subunit 1                                       | <i>Ice1</i>                          | -1,8830364 | 1,44E-05   |
| Ubiquitin specific peptidase 10                                                             | <i>Usp10</i>                         | -1,8825579 | 9,36E-05   |
| Rbm14-Rbm4 readthrough /// RNA binding motif protein 4                                      | <i>Rbm14-rbm4 ///</i><br><i>Rbm4</i> | -1,8811303 | 4,26E-05   |
| Pleckstrin homology domain containing, family F (with FYVE domain) member 2                 | <i>Plekhf2</i>                       | -1,8809733 | 0,00069496 |
| Glutamine and serine rich 1                                                                 | <i>Qser1</i>                         | -1,8804835 | 0,00016329 |
| RIKEN cdna 2810004N23 gene                                                                  | <i>2810004N23Rik</i>                 | -1,8801819 | 5,18E-06   |
| Expressed sequence AI462493                                                                 | <i>AI462493</i>                      | -1,8790461 | 6,41E-06   |
| Methylthioadenosine phosphorylase                                                           | <i>Mtap</i>                          | -1,8787518 | 8,10E-05   |
| Helicase, lymphoid specific                                                                 | <i>Hells</i>                         | -1,8776583 | 0,00010505 |
| Contactin associated protein-like 4                                                         | <i>Cntnap4</i>                       | -1,8767297 | 0,00035172 |
| Peroxiredoxin 3                                                                             | <i>Prdx3</i>                         | -1,8757572 | 9,77E-06   |
| Lysophosphatidic acid receptor 1                                                            | <i>Lpar1</i>                         | -1,8740904 | 3,33E-05   |
| Poly(A) binding protein, nuclear 1                                                          | <i>Pabpn1</i>                        | -1,8728842 | 0,00043953 |
| Cache domain containing 1                                                                   | <i>Cachd1</i>                        | -1,8725484 | 7,95E-06   |
| Leucine-rich PPR-motif containing                                                           | <i>Lrprrc</i>                        | -1,8717353 | 4,28E-05   |
| NIMA (never in mitosis gene a)-related expressed kinase 3                                   | <i>Nek3</i>                          | -1,8709677 | 9,62E-05   |
| Ski sarcoma viral oncogene homolog (avian)                                                  | <i>Ski</i>                           | -1,8706676 | 4,06E-06   |
| Mitochondria localized glutamic acid rich protein                                           | <i>Mgarp</i>                         | -1,870285  | 0,0001531  |
| Ring finger and SPRY domain containing 1                                                    | <i>Rspry1</i>                        | -1,867422  | 2,42E-05   |
| Hexokinase 2                                                                                | <i>Hk2</i>                           | -1,8671849 | 2,86E-05   |
| Golgi apparatus protein 1                                                                   | <i>Glg1</i>                          | -1,8665387 | 1,18E-05   |
| Epidermal growth factor receptor pathway substrate 15                                       | <i>Eps15</i>                         | -1,8664199 | 2,28E-05   |
| PHD finger protein 13                                                                       | <i>Phf13</i>                         | -1,8658612 | 8,27E-06   |
| Rap1 interacting factor 1 homolog (yeast)                                                   | <i>Rif1</i>                          | -1,8656855 | 0,00184519 |

|                                                                                |                         |            |            |
|--------------------------------------------------------------------------------|-------------------------|------------|------------|
| Forkhead box F2                                                                | <i>Foxf2</i>            | -1,865015  | 0,00014513 |
| Fas apoptotic inhibitory molecule                                              | <i>Faim</i>             | -1,8649234 | 1,91E-05   |
| CD2-associated protein                                                         | <i>Cd2ap</i>            | -1,8645972 | 0,00141248 |
| Galactose mutarotase                                                           | <i>Galm</i>             | -1,8617269 | 0,00016161 |
| Orosomucoid 1                                                                  | <i>Orm1</i>             | -1,8614926 | 0,00011127 |
| Tyrosyl-trna synthetase                                                        | <i>Yars</i>             | -1,8609408 | 5,26E-06   |
| Phosphatidylinositol 3-kinase, C2 domain containing, alpha polypeptide         | <i>Pik3c2a</i>          | -1,8592128 | 0,0001208  |
| Acyl-coa thioesterase 6                                                        | <i>Acot6</i>            | -1,8590151 | 1,59E-05   |
| Fatty acid desaturase 3                                                        | <i>Fads3</i>            | -1,8589021 | 7,83E-06   |
| Forkhead box N2                                                                | <i>Foxn2</i>            | -1,8569667 | 9,67E-05   |
| Myosin, light polypeptide kinase                                               | <i>Mylk</i>             | -1,8557178 | 0,00022638 |
| Heat shock protein 5                                                           | <i>Hspa5</i>            | -1,8550896 | 2,21E-05   |
| NEDD4 binding protein 1                                                        | <i>N4bp1</i>            | -1,8550537 | 3,47E-06   |
| CD302 antigen                                                                  | <i>Cd302</i>            | -1,8547174 | 0,00026742 |
| Patatin-like phospholipase domain containing 8                                 | <i>Pnpla8</i>           | -1,8540058 | 9,74E-05   |
| Zinc finger and BTB domain containing 21                                       | <i>Zbtb21</i>           | -1,8537072 | 0,00038911 |
| Bone morphogenetic protein receptor, type 1A                                   | <i>Bmpr1a</i>           | -1,8532193 | 5,75E-05   |
| Endonuclease domain containing 1                                               | <i>Endod1</i>           | -1,852876  | 2,35E-05   |
| MAK16 homolog (S. Cerevisiae)                                                  | <i>Mak16</i>            | -1,8520222 | 1,42E-05   |
| Platelet-derived growth factor, C polypeptide                                  | <i>Pdgfc</i>            | -1,8516917 | 4,90E-05   |
| Zinc finger protein 428                                                        | <i>Zfp428</i>           | -1,8484631 | 0,00021608 |
| Heat shock protein family B (small), member 11                                 | <i>Hspb11</i>           | -1,8481158 | 5,27E-05   |
| Predicted pseudogene 5963 /// ribosomal protein S21                            | <i>Gm5963 /// Rps21</i> | -1,846137  | 0,00274762 |
| Chondroitin sulfate N-acetylgalactosaminyltransferase 1                        | <i>Csgalnact1</i>       | -1,8459159 | 2,22E-05   |
| GRP1 (general receptor for phosphoinositides 1)-associated scaffold protein    | <i>Grasp</i>            | -1,8444318 | 0,0002328  |
| Frataxin                                                                       | <i>Fxn</i>              | -1,8421148 | 2,58E-05   |
| U7 snrnp-specific Sm-like protein LSM10                                        | <i>Lsm10</i>            | -1,841545  | 9,38E-06   |
| Zinc finger protein 777                                                        | <i>Zfp777</i>           | -1,8410625 | 1,90E-05   |
| Trna methyltransferase 10C                                                     | <i>Trmt10c</i>          | -1,8408504 | 0,00080342 |
| Heterogeneous nuclear ribonucleoprotein R                                      | <i>Hnrnpr</i>           | -1,8404329 | 0,00012582 |
| Solute carrier family 7 (cationic amino acid transporter, y+ system), member 6 | <i>Slc7a6</i>           | -1,8368218 | 0,00028487 |
| NIMA (never in mitosis gene a)-related expressed kinase 6                      | <i>Nek6</i>             | -1,8358348 | 2,89E-05   |
| Atlastin gtpase 3                                                              | <i>Atl3</i>             | -1,8346097 | 0,00019664 |
| Zinc finger protein 410                                                        | <i>Zfp410</i>           | -1,8331035 | 1,29E-05   |
| Protein tyrosine phosphatase, non-receptor type 22 (lymphoid)                  | <i>Ptpn22</i>           | -1,8327064 | 0,0004772  |
| SWI5 dependent recombination repair 1                                          | <i>Sfr1</i>             | -1,8324736 | 8,98E-05   |
| Protein phosphatase 1, regulatory (inhibitor) subunit 14B                      | <i>Ppp1r14b</i>         | -1,8319272 | 5,19E-06   |
| WW, C2 and coiled-coil domain containing 2                                     | <i>Wwc2</i>             | -1,8307237 | 0,00018972 |
| Peptidyl-trna hydrolase 2                                                      | <i>Ptrh2</i>            | -1,830629  | 8,23E-06   |
| HAUS augmin-like complex, subunit 6                                            | <i>Haus6</i>            | -1,830333  | 0,00026177 |

|                                                                                                            |                                                       |            |            |
|------------------------------------------------------------------------------------------------------------|-------------------------------------------------------|------------|------------|
| Ribosomal protein L31 /// ribosomal protein L31, pseudogene 1 2                                            | <i>Rpl31 /// Rpl31-ps12</i>                           | -1,8300662 | 5,23E-05   |
| Dnaj (Hsp40) homolog, subfamily A, member 2                                                                | <i>Dnaja2</i>                                         | -1,8300209 | 0,00060813 |
| Solute carrier family 39 (zinc transporter), member 14                                                     | <i>Slc39a14</i>                                       | -1,8294374 | 1,55E-05   |
| Mucolipin 1                                                                                                | <i>Mcoln1</i>                                         | -1,8293349 | 1,20E-05   |
| Fatty acyl coa reductase 1                                                                                 | <i>Far1</i>                                           | -1,8287807 | 0,00042552 |
| CD200 antigen                                                                                              | <i>Cd200</i>                                          | -1,8279482 | 0,00355681 |
| Phosphatidylinositol glycan anchor biosynthesis, class N                                                   | <i>Pign</i>                                           | -1,8274115 | 0,00010389 |
| Intercellular adhesion molecule 1                                                                          | <i>Icam1</i>                                          | -1,8268078 | 0,00035293 |
| Translocase of inner mitochondrial membrane 44                                                             | <i>Timm44</i>                                         | -1,8259004 | 5,51E-05   |
| RIKEN cdna 2510009E07 gene                                                                                 | <i>2510009E07Rik</i>                                  | -1,8247303 | 3,42E-05   |
| Interleukin 18 receptor accessory protein                                                                  | <i>Il18rap</i>                                        | -1,8245764 | 6,03E-05   |
| ER membrane protein complex subunit 8                                                                      | <i>Emc8</i>                                           | -1,824479  | 1,27E-05   |
| Star-related lipid transfer (START) domain containing 5                                                    | <i>Stard5</i>                                         | -1,8241153 | 5,55E-05   |
| Zinc finger protein 422                                                                                    | <i>Zfp422</i>                                         | -1,822821  | 0,00085972 |
| Transforming, acidic coiled-coil containing protein 2                                                      | <i>Tacc2</i>                                          | -1,8226144 | 1,35E-05   |
| Adducin 3 (gamma)                                                                                          | <i>Add3</i>                                           | -1,821377  | 3,13E-05   |
| Sterile alpha motif and leucine zipper containing kinase AZK                                               | <i>Zak</i>                                            | -1,8213614 | 3,70E-05   |
| Transducin-like enhancer of split 4, homolog of Drosophila E(spl)                                          | <i>Tle4</i>                                           | -1,8208163 | 9,93E-05   |
| UDP-glcna:betagal beta-1,3-N-acetylglucosaminyltransferase 1                                               | <i>B3gnt1</i>                                         | -1,8206219 | 0,00010863 |
| Amyloid beta (A4) precursor protein                                                                        | <i>App</i>                                            | -1,8193812 | 1,39E-05   |
| Mediator complex subunit 1                                                                                 | <i>Med1</i>                                           | -1,8177513 | 0,00039331 |
| Sjogren's syndrome/scleroderma autoantigen 1 homolog (human)                                               | <i>Sssca1</i>                                         | -1,8172249 | 3,38E-05   |
| Angiomotin                                                                                                 | <i>Amot</i>                                           | -1,8170641 | 0,00022899 |
| Inhibitor of kappab kinase beta                                                                            | <i>Ikbkb</i>                                          | -1,81581   | 2,78E-05   |
| HIG1 domain family, member 2A                                                                              | <i>Higd2a</i>                                         | -1,815404  | 4,26E-05   |
| Family with sequence similarity 32, member A                                                               | <i>Fam32a</i>                                         | -1,8149988 | 1,92E-05   |
| Placental growth factor                                                                                    | <i>Pgf</i>                                            | -1,8147131 | 0,00061047 |
| Thrombospondin, type I, domain 1                                                                           | <i>Thsd1</i>                                          | -1,8146347 | 0,00064027 |
| Insulin degrading enzyme                                                                                   | <i>Ide</i>                                            | -1,8105283 | 1,47E-05   |
| Carbohydrate (N-acetylgalactosamine 4-0) sulfotransferase 14                                               | <i>Chst14</i>                                         | -1,8104507 | 7,60E-06   |
| Angiopietin-like 4                                                                                         | <i>Angptl4</i>                                        | -1,8093563 | 0,00122369 |
| Prokineticin receptor 1                                                                                    | <i>Prokr1</i>                                         | -1,808593  | 7,50E-05   |
| Sideroflexin 2                                                                                             | <i>Sfxn2</i>                                          | -1,8085383 | 0,00013449 |
| Fumarylacetoacetate hydrolase domain containing 1                                                          | <i>Fahd1</i>                                          | -1,8070627 | 2,63E-05   |
| Transmembrane 9 superfamily member 3                                                                       | <i>Tm9sf3</i>                                         | -1,8066763 | 0,00129859 |
| RIKEN cdna 4932431P20 gene /// predicted gene, 21596 /// predicted gene 6115 /// high mobility group box 1 | <i>4932431P20Rik /// Gm21596 /// Gm6115 /// Hmgb1</i> | -1,8064171 | 0,00245043 |
| Interferon gamma receptor 2                                                                                | <i>Ifngr2</i>                                         | -1,8059897 | 2,89E-05   |
| Adhesion molecule with Ig like domain 1                                                                    | <i>Amigo1</i>                                         | -1,8039335 | 0,00019495 |
| Stromal cell derived factor 4                                                                              | <i>Sdf4</i>                                           | -1,803504  | 1,84E-05   |

|                                                                           |                      |            |            |
|---------------------------------------------------------------------------|----------------------|------------|------------|
| Testis expressed gene 10                                                  | <i>Tex10</i>         | -1,8014605 | 4,97E-06   |
| Atpase, class VI, type 11A                                                | <i>Atp11a</i>        | -1,80026   | 1,42E-05   |
| Cell division cycle associated 7                                          | <i>Cdca7</i>         | -1,7989106 | 0,00011531 |
| Seven in absentia 2                                                       | <i>Siah2</i>         | -1,7977982 | 1,47E-05   |
| Max interacting protein 1                                                 | <i>Mxi1</i>          | -1,7974838 | 1,70E-05   |
| Transmembrane protein with EGF-like and two<br>follistatin-like domains 1 | <i>Tmeff1</i>        | -1,7973388 | 0,0020038  |
| Rhomboid, veinlet-like 3 (Drosophila)                                     | <i>Rhbd13</i>        | -1,7963984 | 0,00016694 |
| Receptor-associated protein of the synapse                                | <i>Rapsn</i>         | -1,7962584 | 3,15E-05   |
| F-box and WD-40 domain protein 4                                          | <i>Fbxw4</i>         | -1,795061  | 0,00011134 |
| Secreted phosphoprotein 1                                                 | <i>Spp1</i>          | -1,7950022 | 2,71E-05   |
| Protein phosphatase 1M                                                    | <i>Ppm1m</i>         | -1,7940256 | 0,00022991 |
| Jun B proto-oncogene                                                      | <i>Junb</i>          | -1,7934501 | 0,0008008  |
| Glucuronidase, beta                                                       | <i>Gusb</i>          | -1,7932789 | 0,00044017 |
| P21 protein (Cdc42/Rac)-activated kinase 3                                | <i>Pak3</i>          | -1,7928118 | 8,28E-05   |
| WD repeat domain 74                                                       | <i>Wdr74</i>         | -1,792057  | 2,01E-05   |
| CD151 antigen                                                             | <i>Cd151</i>         | -1,7912572 | 2,19E-05   |
| Atpase, Na+/K+ transporting, alpha 2 polypeptide                          | <i>Atp1a2</i>        | -1,7909946 | 0,00600169 |
| RIKEN cdna 4930453N24 gene                                                | <i>4930453N24Rik</i> | -1,7904757 | 0,00015251 |
| TNF receptor associated factor 4                                          | <i>Traf4</i>         | -1,7898688 | 0,00022595 |
| Mitogen-activated protein kinase 8 interacting protein<br>3               | <i>Mapk8ip3</i>      | -1,7877441 | 0,00025651 |
| Toll-like receptor 2                                                      | <i>Tlr2</i>          | -1,7876196 | 6,65E-05   |
| Ladybird homeobox homolog 1 (Drosophila)                                  | <i>Lbx1</i>          | -1,7864236 | 0,00048071 |
| Phospholipid transfer protein                                             | <i>Pltp</i>          | -1,7856687 | 0,00336225 |
| Protein phosphatase 1, regulatory (inhibitor) subunit 8                   | <i>Ppp1r8</i>        | -1,7852943 | 0,00071084 |
| Zinc finger protein 330                                                   | <i>Zfp330</i>        | -1,7850562 | 1,14E-05   |
| REST corepressor 1                                                        | <i>Rcor1</i>         | -1,7848784 | 1,64E-05   |
| TSR1 20S rna accumulation                                                 | <i>Tsr1</i>          | -1,7841973 | 1,66E-05   |
| Flap structure specific endonuclease 1                                    | <i>Fen1</i>          | -1,783593  | 2,66E-05   |
| Guanine nucleotide binding protein-like 2 (nucleolar)                     | <i>Gnl2</i>          | -1,7827391 | 0,00037893 |
| Arfgap with rhogap domain, ankyrin repeat and PH<br>domain 2              | <i>Arap2</i>         | -1,7816706 | 0,00015049 |
| WD repeat domain containing 83                                            | <i>Wdr83</i>         | -1,7809481 | 0,0001442  |
| Peroxiredoxin 5                                                           | <i>Prdx5</i>         | -1,7803333 | 1,92E-05   |
| Lymphotoxin B receptor                                                    | <i>Ltbr</i>          | -1,7803093 | 0,00013327 |
| Tetraspanin 12                                                            | <i>Tspan12</i>       | -1,7794998 | 0,00026891 |
| THAP domain containing 11                                                 | <i>Thap11</i>        | -1,7789917 | 1,23E-05   |
| Mediator complex subunit 8                                                | <i>Med8</i>          | -1,7782972 | 1,84E-05   |
| ATM interactor                                                            | <i>Atmin</i>         | -1,7777315 | 5,35E-05   |
| Runt related transcription factor 1                                       | <i>Runx1</i>         | -1,7771212 | 6,79E-05   |
| Tumor necrosis factor receptor superfamily, member<br>22                  | <i>Tnfrsf22</i>      | -1,7751567 | 0,00369812 |
| Oxysterol binding protein-like 11                                         | <i>Osbpl11</i>       | -1,7751558 | 0,00014418 |
| High mobility group box transcription factor 1                            | <i>Hbp1</i>          | -1,7751156 | 6,06E-05   |
| Legumain                                                                  | <i>Lgmn</i>          | -1,7746697 | 4,33E-05   |

|                                                                                              |                                       |            |            |
|----------------------------------------------------------------------------------------------|---------------------------------------|------------|------------|
| Fumarylacetoacetate hydrolase                                                                | <i>Fah</i>                            | -1,7741737 | 3,02E-05   |
| Sperm flagellar 1                                                                            | <i>Spef1</i>                          | -1,7741123 | 1,44E-05   |
| Solute carrier family 7 (cationic amino acid transporter, y+ system), member 2               | <i>Slc7a2</i>                         | -1,7724662 | 0,00079689 |
| Eukaryotic translation initiation factor 4, gamma 1                                          | <i>Eif4g1</i>                         | -1,7719065 | 0,00505066 |
| Peroxiredoxin 2                                                                              | <i>Prdx2</i>                          | -1,7716232 | 1,79E-05   |
| Mitochondrial ribosomal protein L11                                                          | <i>Mrpl11</i>                         | -1,7711587 | 3,14E-05   |
| SUMO/sentrin specific peptidase 6                                                            | <i>Senp6</i>                          | -1,7709077 | 0,00010713 |
| Serine/arginine-rich splicing factor 3                                                       | <i>Srsf3</i>                          | -1,7705228 | 0,00300055 |
| PHD finger protein 3                                                                         | <i>Phf3</i>                           | -1,7691424 | 0,00724753 |
| CLOCK interacting protein, circadian                                                         | <i>Cipc</i>                           | -1,7685465 | 1,05E-05   |
| UDP-Gal:betagal beta 1,3-galactosyltransferase, polypeptide 6                                | <i>B3galt6</i>                        | -1,7681073 | 3,49E-05   |
| Zinc finger, CCHC domain containing 14                                                       | <i>Zcchc14</i>                        | -1,768107  | 4,61E-05   |
| Forkhead box P1                                                                              | <i>Foxp1</i>                          | -1,7663387 | 2,65E-05   |
| Arylsulfatase A                                                                              | <i>Arsa</i>                           | -1,7660407 | 1,40E-05   |
| Transmembrane protein 218                                                                    | <i>Tmem218</i>                        | -1,765829  | 0,00036196 |
| RIKEN cdna 1810009A15 gene /// uncharacterized LOC102308570                                  | <i>1810009A15Rik /// LOC102308570</i> | -1,7658277 | 1,55E-05   |
| M phase phosphoprotein 6                                                                     | <i>Mphosph6</i>                       | -1,7656621 | 2,59E-05   |
| Mutl homolog 3 (E coli)                                                                      | <i>Mlh3</i>                           | -1,7656113 | 9,29E-05   |
| ATPase, H <sup>+</sup> transporting, lysosomal V1 subunit F                                  | <i>Atp6v1f</i>                        | -1,7646158 | 2,10E-05   |
| Zinc finger and BTB domain containing 8a                                                     | <i>Zbtb8a</i>                         | -1,7638086 | 0,00035912 |
| Microrchidia 3                                                                               | <i>Morc3</i>                          | -1,7636804 | 0,00144222 |
| Dihydrolipoamide S-succinyltransferase (E2 component of 2-oxo-glutarate complex)             | <i>Dlst</i>                           | -1,7632964 | 1,52E-05   |
| --- /// RAB26, member RAS oncogene family, opposite strand                                   | <i>2610019E17Rik /// Rab26os</i>      | -1,7631063 | 0,00403316 |
| Family with sequence similarity 178, member A                                                | <i>Fam178a</i>                        | -1,7630166 | 0,00043287 |
| Alcohol dehydrogenase, iron containing, 1                                                    | <i>Adhfe1</i>                         | -1,7584427 | 0,00034882 |
| 1-acylglycerol-3-phosphate O-acyltransferase 6 (lysophosphatidic acid acyltransferase, zeta) | <i>Agpat6</i>                         | -1,7579763 | 0,00061757 |
| Eukaryotic translation elongation factor 1 delta (guanine nucleotide exchange protein)       | <i>Eef1d</i>                          | -1,7578941 | 1,27E-05   |
| Non-catalytic region of tyrosine kinase adaptor protein 1                                    | <i>Nck1</i>                           | -1,7577384 | 0,00029038 |
| Rho/rac guanine nucleotide exchange factor (GEF) 18                                          | <i>Arhgef18</i>                       | -1,7575874 | 9,61E-05   |
| Y box protein 3                                                                              | <i>Ybx3</i>                           | -1,7562527 | 4,83E-05   |
| Sirtuin 1                                                                                    | <i>Sirt1</i>                          | -1,7553491 | 0,00014513 |
| Vacuole membrane protein 1                                                                   | <i>Vmp1</i>                           | -1,7544198 | 4,70E-06   |
| Coiled-coil domain containing 84                                                             | <i>Ccdc84</i>                         | -1,7534478 | 0,00036145 |
| Serine/arginine-rich protein specific kinase 1                                               | <i>Srpk1</i>                          | -1,75154   | 2,80E-05   |
| Exostoses (multiple) 1                                                                       | <i>Ext1</i>                           | -1,7514839 | 1,40E-05   |
| Family with sequence similarity 192, member A                                                | <i>Fam192a</i>                        | -1,7514241 | 1,60E-05   |
| E74-like factor 2                                                                            | <i>Elf2</i>                           | -1,7512071 | 0,00383655 |
| Tryptophanyl-trna synthetase                                                                 | <i>Wars</i>                           | -1,7510321 | 0,00015138 |
| Telomeric repeat binding factor 2                                                            | <i>Terf2</i>                          | -1,7495151 | 5,09E-05   |
| Heparan-alpha-glucosaminide N-acetyltransferase                                              | <i>Hgsnat</i>                         | -1,7494355 | 3,47E-05   |



|                                                                                                                                |                                                   |            |            |
|--------------------------------------------------------------------------------------------------------------------------------|---------------------------------------------------|------------|------------|
| Predicted gene 10349 /// predicted pseudogene 9386 /// nuclear transport factor 2 /// nuclear transport factor 2, pseudogene 1 | <i>Gm10349 /// Gm9386 /// Nutf2 /// Nutf2-ps1</i> | -1,7477325 | 2,22E-05   |
| NOP56 ribonucleoprotein                                                                                                        | <i>Nop56</i>                                      | -1,7475036 | 1,82E-05   |
| Interleukin 11                                                                                                                 | <i>Il11</i>                                       | -1,7465893 | 0,00011771 |
| Fibroblast growth factor (acidic) intracellular binding protein                                                                | <i>Fibp</i>                                       | -1,7452654 | 4,58E-05   |
| Prefoldin subunit 6                                                                                                            | <i>Pfdn6</i>                                      | -1,7449728 | 6,75E-05   |
| Mucolipin 3                                                                                                                    | <i>Mcoln3</i>                                     | -1,7442108 | 0,00032787 |
| Histone cluster 1, h1c                                                                                                         | <i>Hist1h1c</i>                                   | -1,7436993 | 0,00299673 |
| Ring finger protein 128                                                                                                        | <i>Rnf128</i>                                     | -1,7435021 | 0,00012702 |
| Keratin 80                                                                                                                     | <i>Krt80</i>                                      | -1,7433043 | 0,00032559 |
| Cdna sequence BC003965                                                                                                         | <i>BC003965</i>                                   | -1,7431366 | 2,02E-05   |
| Zinc finger protein 960 /// zinc finger protein 97                                                                             | <i>Zfp960 /// Zfp97</i>                           | -1,7424854 | 0,00028449 |
| Rho family gtpase 3                                                                                                            | <i>Rnd3</i>                                       | -1,7413087 | 6,97E-05   |
| Collagen, type XII, alpha 1                                                                                                    | <i>Col12a1</i>                                    | -1,7383292 | 0,0023225  |
| Gamma-glutamyl hydrolase                                                                                                       | <i>Ggh</i>                                        | -1,7377086 | 0,00095496 |
| Sphingomyelin phosphodiesterase, acid-like 3A                                                                                  | <i>Smpdl3a</i>                                    | -1,7376647 | 6,60E-05   |
| Phosphatidylinositol 4-kinase type 2 alpha                                                                                     | <i>Pi4k2a</i>                                     | -1,7354053 | 2,81E-05   |
| Cytochrome c oxidase assembly protein 15                                                                                       | <i>Cox15</i>                                      | -1,7346717 | 2,78E-05   |
| HECT domain containing 1                                                                                                       | <i>Hectd1</i>                                     | -1,7340627 | 8,30E-05   |
| Fatty acid desaturase 2                                                                                                        | <i>Fads2</i>                                      | -1,732399  | 1,61E-05   |
| NTF2-related export protein 1                                                                                                  | <i>Nxt1</i>                                       | -1,7317228 | 1,34E-05   |
| Metal response element binding transcription factor 2                                                                          | <i>Mtf2</i>                                       | -1,7312448 | 0,00383471 |
| Ribosomal protein S6 kinase polypeptide 3                                                                                      | <i>Rps6ka3</i>                                    | -1,7311745 | 0,00016389 |
| Complement component 1, q subcomponent binding protein                                                                         | <i>C1qbp</i>                                      | -1,7302609 | 6,78E-06   |
| Ubiquitin specific peptidase 11                                                                                                | <i>Usp11</i>                                      | -1,7299344 | 0,00050492 |
| Zinc finger protein 617                                                                                                        | <i>Zfp617</i>                                     | -1,7298008 | 2,39E-05   |
| Solute carrier family 7 (cationic amino acid transporter, y+ system), member 11                                                | <i>Slc7a11</i>                                    | -1,7296196 | 0,00597696 |
| Zinc finger protein 445                                                                                                        | <i>Zfp445</i>                                     | -1,7294833 | 0,00024753 |
| UHRF1 (ICBP90) binding protein 1                                                                                               | <i>Uhrf1bp1</i>                                   | -1,7288239 | 5,49E-05   |
| POU domain, class 6, transcription factor 1                                                                                    | <i>Pou6f1</i>                                     | -1,7282853 | 3,15E-05   |
| Immediate early response 3                                                                                                     | <i>Ier3</i>                                       | -1,7273387 | 1,88E-05   |
| Sel-1 suppressor of lin-12-like (C. Elegans)                                                                                   | <i>Sel1l</i>                                      | -1,7271652 | 0,0001558  |
| Target of EGR1, member 1 (nuclear)                                                                                             | <i>Toe1</i>                                       | -1,727084  | 4,92E-05   |
| CAP-GLY domain containing linker protein 1                                                                                     | <i>Clip1</i>                                      | -1,726622  | 0,00012987 |
| UTP11-like, U3 small nucleolar ribonucleoprotein, (yeast)                                                                      | <i>Utp11l</i>                                     | -1,7260043 | 0,0003272  |
| Solute carrier family 39 (zinc transporter), member 7                                                                          | <i>Slc39a7</i>                                    | -1,7255014 | 1,06E-05   |
| Solute carrier family 25, member 36                                                                                            | <i>Slc25a36</i>                                   | -1,723691  | 0,00017372 |
| Scavenger receptor class B, member 2                                                                                           | <i>Scarb2</i>                                     | -1,7225509 | 2,17E-05   |
| Myod family inhibitor domain containing                                                                                        | <i>Mdfic</i>                                      | -1,7222644 | 0,0002504  |
| RIKEN cdna 4632428N05 gene                                                                                                     | <i>4632428N05Rik</i>                              | -1,7199632 | 0,00030148 |
| Tropomodulin 3                                                                                                                 | <i>Tmod3</i>                                      | -1,7195654 | 0,00144625 |

|                                                                                                   |                 |            |            |
|---------------------------------------------------------------------------------------------------|-----------------|------------|------------|
| Receptor (TNFRSF)-interacting serine-threonine kinase 2                                           | <i>Ripk2</i>    | -1,7190745 | 4,77E-05   |
| Nudix (nucleoside diphosphate linked moiety X)-type motif 14                                      | <i>Nudt14</i>   | -1,7180218 | 0,00068783 |
| SPRY domain containing 7                                                                          | <i>Spryd7</i>   | -1,7178057 | 0,00184696 |
| Methylenetetrahydrofolate dehydrogenase (NAD+ dependent), methenyltetrahydrofolate cyclohydrolase | <i>Mthfd2</i>   | -1,7176719 | 4,14E-05   |
| Centrosomal protein 68                                                                            | <i>Cep68</i>    | -1,7172285 | 1,69E-05   |
| Phospholipid scramblase 1                                                                         | <i>Plscr1</i>   | -1,7155966 | 0,00096642 |
| Peroxisomal biogenesis factor 6                                                                   | <i>Pex6</i>     | -1,7152908 | 6,32E-05   |
| Prolactin family 6, subfamily a, member 1                                                         | <i>Prl6a1</i>   | -1,7149968 | 0,00091113 |
| Peroxisome proliferative activated receptor, gamma, coactivator-related 1                         | <i>Pprc1</i>    | -1,7147696 | 2,40E-05   |
| Anoctamin 10                                                                                      | <i>Ano10</i>    | -1,7120055 | 2,86E-05   |
| Integrin beta 6                                                                                   | <i>Itgb6</i>    | -1,7117932 | 0,00072941 |
| Ventral anterior homeobox 2                                                                       | <i>Vax2</i>     | -1,7116794 | 0,00018518 |
| Carnitine palmitoyltransferase 2                                                                  | <i>Cpt2</i>     | -1,7114927 | 2,57E-05   |
| TSR3 20S rRNA accumulation                                                                        | <i>Tsr3</i>     | -1,7114158 | 0,00010376 |
| OTU domain, ubiquitin aldehyde binding 2                                                          | <i>Otub2</i>    | -1,7112972 | 0,00025423 |
| Family with sequence similarity 118, member B                                                     | <i>Fam118b</i>  | -1,7111051 | 0,00062093 |
| Dual-specificity tyrosine-(Y)-phosphorylation regulated kinase 3                                  | <i>Dyrk3</i>    | -1,7107664 | 8,40E-05   |
| RB1-inducible coiled-coil 1                                                                       | <i>Rb1cc1</i>   | -1,7105768 | 1,65E-05   |
| Spindlin 1                                                                                        | <i>Spin1</i>    | -1,7099823 | 8,88E-05   |
| RIO kinase 2 (yeast)                                                                              | <i>Riok2</i>    | -1,7097521 | 1,40E-05   |
| Cytochrome c oxidase subunit viiia                                                                | <i>Cox8a</i>    | -1,7091714 | 5,46E-05   |
| PDLIM1 interacting kinase 1 like                                                                  | <i>Pdik1l</i>   | -1,7090587 | 0,00160228 |
| Fc receptor, ige, low affinity II, alpha polypeptide                                              | <i>Fcer2a</i>   | -1,7079448 | 0,00123895 |
| Tenascin C                                                                                        | <i>Tnc</i>      | -1,7073908 | 0,00186058 |
| Solute carrier family 4, sodium bicarbonate cotransporter, member 7                               | <i>Slc4a7</i>   | -1,7065006 | 0,00393314 |
| High mobility group nucleosomal binding domain 1                                                  | <i>Hmgcn1</i>   | -1,7061968 | 1,05E-05   |
| Transporter 1, ATP-binding cassette, sub-family B (MDR/TAP)                                       | <i>Tap1</i>     | -1,70599   | 0,00018166 |
| Splicing factor 3b, subunit 2                                                                     | <i>Sf3b2</i>    | -1,7055168 | 5,56E-05   |
| Kelch domain containing 3                                                                         | <i>Klhdc3</i>   | -1,7053407 | 0,00039514 |
| Forkhead box Q1                                                                                   | <i>Foxq1</i>    | -1,7041959 | 0,00619057 |
| Arginine and glutamate rich 1                                                                     | <i>Arglu1</i>   | -1,7040414 | 0,00128754 |
| Chitinase, di-N-acetyl-                                                                           | <i>Ctbs</i>     | -1,7030775 | 0,00326176 |
| Neuraminidase 1                                                                                   | <i>Neu1</i>     | -1,7024114 | 0,00061396 |
| GA repeat binding protein, alpha                                                                  | <i>Gabpa</i>    | -1,7020113 | 0,00096471 |
| IAP promoted placental gene                                                                       | <i>Ipp</i>      | -1,701566  | 0,00161331 |
| Transmembrane protein 179B                                                                        | <i>Tmem179b</i> | -1,7014444 | 9,89E-05   |
| ATPase, H+ transporting, lysosomal V1 subunit B2                                                  | <i>Atp6v1b2</i> | -1,700442  | 5,88E-05   |
| Cytotoxic T lymphocyte-associated protein 2 beta                                                  | <i>Ctla2b</i>   | -1,6999924 | 9,68E-06   |
| Nuclear assembly factor 1 homolog (S. Cerevisiae)                                                 | <i>Naf1</i>     | -1,6988905 | 0,00017755 |
| SDA1 domain containing 1                                                                          | <i>Sdad1</i>    | -1,6981569 | 0,00082526 |

|                                                                                              |                                 |            |            |
|----------------------------------------------------------------------------------------------|---------------------------------|------------|------------|
| Coordinator of PRMT5, differentiation stimulator                                             | <i>Coprs</i>                    | -1,6976787 | 2,29E-05   |
| Lysosomal-associated membrane protein 3 ///<br>peptidylprolyl isomerase D (cyclophilin D)    | <i>Lamp3</i> /// <i>Ppid</i>    | -1,6975751 | 3,59E-05   |
| Seven in absentia 1A /// seven in absentia 1B                                                | <i>Siah1a</i> /// <i>Siah1b</i> | -1,6970483 | 0,00140315 |
| Finkel-Biskis-Reilly murine sarcoma virus (FBR-musv)<br>ubiquitously expressed (fox derived) | <i>Fau</i>                      | -1,6961939 | 2,00E-05   |
| Translocase of outer mitochondrial membrane 20<br>homolog (yeast)                            | <i>Tomm20</i>                   | -1,6961271 | 0,00016344 |
| Paraoxonase 2                                                                                | <i>Pon2</i>                     | -1,6951933 | 0,00993476 |
| Protein kinase C substrate 80K-H                                                             | <i>Prkcsh</i>                   | -1,6947975 | 4,08E-05   |
| Iroquois related homeobox 5 (Drosophila)                                                     | <i>Irx5</i>                     | -1,6947744 | 0,000136   |
| Solute carrier family 29 (nucleoside transporters),<br>member 2                              | <i>Slc29a2</i>                  | -1,6944869 | 0,00032385 |
| Butyrophilin, subfamily 1, member A1                                                         | <i>Btn1a1</i>                   | -1,6942355 | 0,00105503 |
| CDK2-associated protein 2                                                                    | <i>Cdk2ap2</i>                  | -1,6939759 | 3,59E-05   |
| Nudix (nucleoside diphosphate linked moiety X)-type<br>motif 22                              | <i>Nudt22</i>                   | -1,6929635 | 0,00039465 |
| Cell division cycle 37-like 1                                                                | <i>Cdc37l1</i>                  | -1,6915591 | 0,00063215 |
| Dnaj (Hsp40) homolog, subfamily C, member 27                                                 | <i>Dnajc27</i>                  | -1,6914915 | 0,00136812 |
| Superoxide dismutase 2, mitochondrial                                                        | <i>Sod2</i>                     | -1,6909995 | 8,21E-06   |
| Zinc finger, DHHC domain containing 12                                                       | <i>Zdhhc12</i>                  | -1,6890051 | 5,47E-05   |
| Laminin, beta 2                                                                              | <i>Lamb2</i>                    | -1,6886079 | 0,00019565 |
| Carbohydrate (N-acetylgalactosamine 4-sulfate 6-O)<br>sulfotransferase 15                    | <i>Chst15</i>                   | -1,6879774 | 0,00264945 |
| Patched homolog 1                                                                            | <i>Ptch1</i>                    | -1,6872684 | 0,00026611 |
| Ly6/neurotoxin 1                                                                             | <i>Lynx1</i>                    | -1,6866635 | 0,00011364 |
| Nuclear factor, erythroid derived 2, like 2                                                  | <i>Nfe2l2</i>                   | -1,6862028 | 0,0018454  |
| 3-phosphoglycerate dehydrogenase pseudogene /// 3-<br>phosphoglycerate dehydrogenase         | <i>Gm6756</i> /// <i>Phgdh</i>  | -1,6856667 | 1,09E-05   |
| Chaperonin containing Tcp1, subunit 8 (theta)                                                | <i>Cct8</i>                     | -1,6855584 | 6,94E-05   |
| Transmembrane protein 147                                                                    | <i>Tmem147</i>                  | -1,6852609 | 2,94E-05   |
| Leucine rich repeat containing 42                                                            | <i>Lrrc42</i>                   | -1,6847988 | 0,00053213 |
| Kruppel-like factor 5                                                                        | <i>Klf5</i>                     | -1,6847378 | 0,00040939 |
| Growth arrest and DNA-damage-inducible, gamma<br>interacting protein 1                       | <i>Gadd45gip1</i>               | -1,684676  | 0,00018617 |
| Xylosylprotein beta1,4-galactosyltransferase,<br>polypeptide 7 (galactosyltransferase I)     | <i>B4galt7</i>                  | -1,6836628 | 0,00027249 |
| Keratin 10                                                                                   | <i>Krt10</i>                    | -1,6826202 | 0,00037366 |
| 5-methyltetrahydrofolate-homocysteine<br>methyltransferase reductase                         | <i>Mtrr</i>                     | -1,6825436 | 3,04E-05   |
| Structural maintenance of chromosomes 5                                                      | <i>Smc5</i>                     | -1,6819125 | 6,80E-05   |
| Deoxynucleotidyltransferase, terminal, interacting<br>protein 2                              | <i>Dnttip2</i>                  | -1,6812704 | 5,56E-05   |
| SRY (sex determining region Y)-box 4                                                         | <i>Sox4</i>                     | -1,6809269 | 9,09E-05   |
| Protein tyrosine phosphatase, non-receptor type 21                                           | <i>Ptpn21</i>                   | -1,6789133 | 0,00077436 |
| Growth hormone receptor                                                                      | <i>Ghr</i>                      | -1,6780595 | 0,00010548 |
| Tetratricopeptide repeat domain 3                                                            | <i>Ttc3</i>                     | -1,6762934 | 0,00069066 |
| Serum amyloid A 1                                                                            | <i>Saa1</i>                     | -1,6753299 | 0,00023652 |
| Zinc finger protein 868                                                                      | <i>Zfp868</i>                   | -1,6740142 | 0,00021008 |

|                                                                                                |                                                  |            |            |
|------------------------------------------------------------------------------------------------|--------------------------------------------------|------------|------------|
| Jun proto-oncogene                                                                             | <i>Jun</i>                                       | -1,6739944 | 0,0001581  |
| Mitochondrial ribosomal protein S18B                                                           | <i>Mrps18b</i>                                   | -1,6731052 | 3,77E-05   |
| Ariadne homolog 2 (Drosophila)                                                                 | <i>Arih2</i>                                     | -1,6723043 | 1,68E-05   |
| Nuclear factor of activated T cells 5                                                          | <i>Nfat5</i>                                     | -1,6715933 | 0,00019307 |
| Predicted gene 561                                                                             | <i>Gm561</i>                                     | -1,6711139 | 9,36E-05   |
| Nucleoporin 50                                                                                 | <i>Nup50</i>                                     | -1,6703428 | 0,00015566 |
| Galactosidase, alpha                                                                           | <i>Gla</i>                                       | -1,6700646 | 1,70E-05   |
| Autism susceptibility candidate 2                                                              | <i>Auts2</i>                                     | -1,6692109 | 0,00350407 |
| Zinc finger and BTB domain containing 22                                                       | <i>Zbtb22</i>                                    | -1,6681093 | 2,98E-05   |
| N-acetylneuraminic acid phosphatase                                                            | <i>Nanp</i>                                      | -1,6678696 | 9,26E-05   |
| Predicted gene 5633 /// predicted gene 9178 /// MRT4, mrna turnover 4, homolog (S. Cerevisiae) | <i>Gm5633</i> /// <i>Gm9178</i> /// <i>Mrto4</i> | -1,6677536 | 0,00012849 |
| Zinc finger, HIT domain containing 2                                                           | <i>Znhit2</i>                                    | -1,6666869 | 0,00021062 |
| Oxidative stress responsive serine rich 1                                                      | <i>Oser1</i>                                     | -1,6664609 | 2,45E-05   |
| Zinc finger, AN1-type domain 2A                                                                | <i>Zfand2a</i>                                   | -1,666269  | 5,43E-05   |
| Transferrin receptor                                                                           | <i>Tfrc</i>                                      | -1,6660503 | 9,37E-05   |
| Yes-associated protein 1                                                                       | <i>Yap1</i>                                      | -1,6659897 | 4,60E-05   |
| Chemokine (C-X-C motif) ligand 10                                                              | <i>Cxcl10</i>                                    | -1,6652132 | 0,00316737 |
| Checkpoint kinase 1                                                                            | <i>Chek1</i>                                     | -1,6649808 | 0,00014204 |
| Succinate dehydrogenase complex assembly factor 1                                              | <i>Sdhaf1</i>                                    | -1,6648324 | 3,77E-05   |
| Embigin                                                                                        | <i>Emb</i>                                       | -1,6634047 | 0,00219293 |
| Eukaryotic translation initiation factor 2B, subunit 2 beta                                    | <i>Eif2b2</i>                                    | -1,6630545 | 0,00016812 |
| Nuclear transcription factor, X-box binding-like 1                                             | <i>Nfxl1</i>                                     | -1,6628527 | 0,00287331 |
| Bystin-like                                                                                    | <i>Bysl</i>                                      | -1,6622731 | 0,00065736 |
| Zinc finger protein 189                                                                        | <i>Zfp189</i>                                    | -1,6621048 | 0,00054019 |
| Growth factor independent 1                                                                    | <i>Gfi1</i>                                      | -1,6612297 | 0,0001374  |
| Kelch-like 26                                                                                  | <i>Klhl26</i>                                    | -1,6608848 | 7,89E-05   |
| CCR4-NOT transcription complex, subunit 1 /// predicted gene 6158                              | <i>Cnot1</i> /// <i>Gm6158</i>                   | -1,660796  | 6,96E-05   |
| Insulin receptor substrate 2                                                                   | <i>Irs2</i>                                      | -1,6603707 | 0,00052511 |
| Interferon regulatory factor 2                                                                 | <i>Irf2</i>                                      | -1,6602652 | 0,00062565 |
| Intersectin 2                                                                                  | <i>Itsn2</i>                                     | -1,6596865 | 0,00285018 |
| Serine hydroxymethyltransferase 2 (mitochondrial)                                              | <i>Shmt2</i>                                     | -1,6596211 | 0,00028676 |
| T-box 15                                                                                       | <i>Tbx15</i>                                     | -1,6595053 | 0,00912172 |
| Upstream binding protein 1                                                                     | <i>Ubp1</i>                                      | -1,659428  | 0,00013836 |
| Zinc finger protein 790                                                                        | <i>Zfp790</i>                                    | -1,6592074 | 0,00182811 |
| Bleomycin hydrolase                                                                            | <i>Blmh</i>                                      | -1,6590463 | 5,33E-05   |
| Yrdc domain containing (E.coli)                                                                | <i>Yrdc</i>                                      | -1,6584285 | 0,00012841 |
| PAP associated domain containing 4                                                             | <i>Papd4</i>                                     | -1,6580877 | 0,00403509 |
| Iron-sulfur cluster assembly 2 homolog (S. Cerevisiae)                                         | <i>Isca2</i>                                     | -1,6579463 | 5,33E-05   |
| Ectonucleoside triphosphate diphosphohydrolase 7                                               | <i>Entpd7</i>                                    | -1,6577865 | 0,00324034 |
| Discoidin, CUB and LCCL domain containing 2                                                    | <i>Dcbld2</i>                                    | -1,657377  | 0,00120822 |
| Sal-like 2 (Drosophila)                                                                        | <i>Sall2</i>                                     | -1,6570123 | 0,00040897 |
| Protein tyrosine phosphatase 4a2                                                               | <i>Ptp4a2</i>                                    | -1,6568537 | 0,0063532  |
| Integrin beta 5                                                                                | <i>Itgb5</i>                                     | -1,6566354 | 0,00013564 |

|                                                                                     |                                         |            |            |
|-------------------------------------------------------------------------------------|-----------------------------------------|------------|------------|
| Guanine nucleotide binding protein-like 3 (nucleolar)                               | <i>Gnl3</i>                             | -1,6562636 | 2,55E-05   |
| Potassium channel tetramerisation domain containing 20                              | <i>Kctd20</i>                           | -1,6559291 | 0,00018256 |
| Homeodomain interacting protein kinase 2                                            | <i>Hipk2</i>                            | -1,6555474 | 4,79E-05   |
| Lysocardiolipin acyltransferase 1                                                   | <i>Lclat1</i>                           | -1,6544211 | 4,12E-05   |
| Zinc finger protein 51                                                              | <i>Zfp51</i>                            | -1,6542492 | 0,00479695 |
| Lysm, putative peptidoglycan-binding, domain containing 2                           | <i>Lysmd2</i>                           | -1,6539949 | 0,00087848 |
| Pescadillo homolog 1, containing BRCT domain (zebrafish)                            | <i>Pes1</i>                             | -1,653884  | 0,00031889 |
| TAR DNA binding protein                                                             | <i>Tardbp</i>                           | -1,651699  | 0,00082195 |
| Vasodilator-stimulated phosphoprotein                                               | <i>Vasp</i>                             | -1,6506392 | 0,0001279  |
| Cyclin-dependent kinase 11B                                                         | <i>Cdk11b</i>                           | -1,6504804 | 0,0003188  |
| Collagen, type XVII, alpha 1                                                        | <i>Col17a1</i>                          | -1,650238  | 0,00374561 |
| F-box and leucine-rich repeat protein 8                                             | <i>Fbxl8</i>                            | -1,6494071 | 0,00215747 |
| Zinc finger protein 68                                                              | <i>Zfp68</i>                            | -1,6491436 | 0,00039514 |
| ATPase family, AAA domain containing 2B                                             | <i>Atad2b</i>                           | -1,6490602 | 0,00013797 |
| Terminal uridylyl transferase 1, U6 snrna-specific                                  | <i>Tut1</i>                             | -1,648682  | 2,49E-05   |
| Cullin 4A                                                                           | <i>Cul4a</i>                            | -1,6484864 | 9,34E-05   |
| RIKEN cdna 9130004C02 gene                                                          | <i>9130004C02Rik</i>                    | -1,6484848 | 0,00705679 |
| RNA binding motif protein 39                                                        | <i>Rbm39</i>                            | -1,6483542 | 0,00012121 |
| RIKEN cdna 1110054M08 gene                                                          | <i>1110054M08Rik</i>                    | -1,6481994 | 0,00664812 |
| NADH dehydrogenase (ubiquinone) Fe-S protein 8                                      | <i>Ndufs8</i>                           | -1,6476346 | 0,00015787 |
| PRP4 pre-mrna processing factor 4 homolog B (yeast)                                 | <i>Prpf4b</i>                           | -1,6472315 | 0,00015966 |
| Proviral integration site 1                                                         | <i>Pim1</i>                             | -1,6469027 | 5,17E-05   |
| Septin 2                                                                            | <i>IX.02</i>                            | -1,6462992 | 9,66E-05   |
| RIKEN cdna 2410016O06 gene                                                          | <i>2410016O06Rik</i>                    | -1,6462761 | 1,90E-05   |
| Tripartite motif-containing 13                                                      | <i>Trim13</i>                           | -1,643792  | 0,00626451 |
| General transcription factor II E, polypeptide 2 (beta subunit)                     | <i>Gtf2e2</i>                           | -1,6437868 | 0,00024553 |
| Coiled-coil-helix-coiled-coil-helix domain containing 4                             | <i>Chchd4</i>                           | -1,6430659 | 0,00028754 |
| Shugoshin-like 1 (S. Pombe)                                                         | <i>Sgol1</i>                            | -1,6429031 | 6,36E-05   |
| Echinoderm microtubule associated protein like 5                                    | <i>Eml5</i>                             | -1,6425798 | 0,00030249 |
| MAU2 chromatid cohesion factor homolog (C. Elegans)                                 | <i>Mau2</i>                             | -1,6423467 | 0,00025423 |
| Rho gtpase activating protein 20                                                    | <i>Arhgap20</i>                         | -1,6423103 | 0,0027511  |
| WW domain binding protein 1 like                                                    | <i>Wbp1l</i>                            | -1,6421543 | 6,79E-05   |
| ATP synthase, H+ transporting, mitochondrial F1 complex, O subunit                  | <i>Atp5o</i>                            | -1,6418682 | 0,0006032  |
| Receptor-like tyrosine kinase                                                       | <i>Ryk</i>                              | -1,6405796 | 1,51E-05   |
| Guanine nucleotide binding protein (G protein), beta polypeptide 1-like             | <i>Gnb1l</i>                            | -1,6405744 | 0,00031934 |
| Eukaryotic translation elongation factor 1 gamma /// elongation factor 1-gamma-like | <i>Eef1g ///</i><br><i>LOC101055956</i> | -1,6392231 | 1,47E-05   |
| Ring finger protein 26                                                              | <i>Rnf26</i>                            | -1,6392044 | 2,70E-05   |
| Translocase of outer mitochondrial membrane 70 homolog A (yeast)                    | <i>Tomm70a</i>                          | -1,6386319 | 0,00185585 |
| HEAT repeat containing 1                                                            | <i>Heatr1</i>                           | -1,6382964 | 0,00770596 |
| Cdna sequence BC027231                                                              | <i>BC027231</i>                         | -1,637374  | 0,0001302  |

|                                                                                                                                                                                                                       |                                                                                                              |            |            |
|-----------------------------------------------------------------------------------------------------------------------------------------------------------------------------------------------------------------------|--------------------------------------------------------------------------------------------------------------|------------|------------|
| Expressed sequence AU040320                                                                                                                                                                                           | <i>AU040320</i>                                                                                              | -1,6366502 | 0,00387527 |
| Dual specificity phosphatase 13                                                                                                                                                                                       | <i>Dusp13</i>                                                                                                | -1,6365428 | 0,00017251 |
| Arginine/serine-rich coiled-coil 2                                                                                                                                                                                    | <i>Rsrc2</i>                                                                                                 | -1,635651  | 0,00104116 |
| SR-related CTD-associated factor 4                                                                                                                                                                                    | <i>Scaf4</i>                                                                                                 | -1,6336445 | 0,00155013 |
| Discoïdin, CUB and LCCL domain containing 1                                                                                                                                                                           | <i>Dcbl1</i>                                                                                                 | -1,6335513 | 0,00010735 |
| Atlantin gtpase 2                                                                                                                                                                                                     | <i>Atl2</i>                                                                                                  | -1,6335373 | 0,00111368 |
| Family with sequence similarity 117, member A                                                                                                                                                                         | <i>Fam117a</i>                                                                                               | -1,6335135 | 0,00503395 |
| Zinc finger, AN1-type domain 3                                                                                                                                                                                        | <i>Zfand3</i>                                                                                                | -1,6318197 | 0,00013925 |
| Predicted gene 3776 /// glutathione S-transferase, alpha 1 (Ya) /// glutathione S-transferase, alpha 2 (Yc2)                                                                                                          | <i>Gm3776 /// Gsta1 /// Gsta2</i>                                                                            | -1,6312329 | 0,00084792 |
| WD repeat domain 77                                                                                                                                                                                                   | <i>Wdr77</i>                                                                                                 | -1,6311202 | 0,00133308 |
| Bromodomain containing 4                                                                                                                                                                                              | <i>Brd4</i>                                                                                                  | -1,6304191 | 0,00350277 |
| Intraflagellar transport 81                                                                                                                                                                                           | <i>Ift81</i>                                                                                                 | -1,6299311 | 8,56E-05   |
| SWI/SNF related, matrix associated, actin dependent regulator of chromatin, subfamily d, member 3                                                                                                                     | <i>Smardc3</i>                                                                                               | -1,6297353 | 0,00036251 |
| Expressed sequence AI503316 /// heterogeneous nuclear ribonucleoprotein U                                                                                                                                             | <i>AI503316 /// Hnrnpu</i>                                                                                   | -1,6292074 | 0,00084056 |
| Fasciculation and elongation protein zeta 1 (zygin I)                                                                                                                                                                 | <i>Fez1</i>                                                                                                  | -1,6290314 | 0,00159037 |
| TATA box binding protein (Tbp)-associated factor, RNA polymerase I, C                                                                                                                                                 | <i>Taf1c</i>                                                                                                 | -1,6288227 | 7,34E-05   |
| Heat shock protein 1                                                                                                                                                                                                  | <i>Hspb1</i>                                                                                                 | -1,6286607 | 0,0015719  |
| Zinc finger protein 292                                                                                                                                                                                               | <i>Zfp292</i>                                                                                                | -1,6281707 | 0,00022006 |
| Ribosomal protein S9                                                                                                                                                                                                  | <i>Rps9</i>                                                                                                  | -1,6279827 | 0,00253964 |
| RIKEN cdna 2810474O19 gene                                                                                                                                                                                            | <i>2810474O19Rik</i>                                                                                         | -1,6275299 | 0,00201029 |
| Histone cluster 1, H3b /// histone cluster 1, H3c /// histone cluster 1, H3d /// histone cluster 1, H3e /// histone cluster 1, H3f /// histone cluster 2, H3b /// histone cluster 2, H3c1 /// histone cluster 2, H3c2 | <i>Hist1h3b /// Hist1h3c /// Hist1h3d /// Hist1h3e /// Hist1h3f /// Hist2h3b /// Hist2h3c1 /// Hist2h3c2</i> | -1,626695  | 0,00127637 |
| Rho gtpase activating protein 8                                                                                                                                                                                       | <i>Arhgap8</i>                                                                                               | -1,6266404 | 6,29E-05   |
| Ring finger protein 113A1                                                                                                                                                                                             | <i>Rnf113a1</i>                                                                                              | -1,6252598 | 9,60E-05   |
| Chloride channel, nucleotide-sensitive, 1A                                                                                                                                                                            | <i>Clns1a</i>                                                                                                | -1,6251458 | 8,88E-05   |
| Zinc finger protein 110                                                                                                                                                                                               | <i>Zfp110</i>                                                                                                | -1,6230165 | 0,0005911  |
| Fibroblast growth factor 16                                                                                                                                                                                           | <i>Fgf16</i>                                                                                                 | -1,6225068 | 0,00035781 |
| Phosphatase, orphan 2                                                                                                                                                                                                 | <i>Phospho2</i>                                                                                              | -1,6224271 | 0,00235015 |
| Zinc finger protein 869                                                                                                                                                                                               | <i>Zfp869</i>                                                                                                | -1,6223945 | 0,00146425 |
| DTW domain containing 1                                                                                                                                                                                               | <i>Dtwd1</i>                                                                                                 | -1,621991  | 0,00038586 |
| Lysosomal-associated membrane protein 2                                                                                                                                                                               | <i>Lamp2</i>                                                                                                 | -1,6218468 | 1,77E-05   |
| RIKEN cdna D230025D16 gene                                                                                                                                                                                            | <i>D230025D16Rik</i>                                                                                         | -1,6217961 | 0,00020384 |
| RIKEN cdna 1200015M12 gene /// RIKEN cdna A130040M12 gene                                                                                                                                                             | <i>1200015M12Rik /// A130040M12Rik</i>                                                                       | -1,6210431 | 1,72E-05   |
| Ribosomal L1 domain containing 1                                                                                                                                                                                      | <i>Rsl1d1</i>                                                                                                | -1,6205671 | 8,85E-05   |
| Zinc finger protein 644                                                                                                                                                                                               | <i>Zfp644</i>                                                                                                | -1,6201798 | 0,00105247 |
| Mesoderm development candidate 2                                                                                                                                                                                      | <i>Mesdc2</i>                                                                                                | -1,6200563 | 2,03E-05   |
| GATA zinc finger domain containing 2A                                                                                                                                                                                 | <i>Gatad2a</i>                                                                                               | -1,6197474 | 0,00031785 |

|                                                                                                                 |                      |            |            |
|-----------------------------------------------------------------------------------------------------------------|----------------------|------------|------------|
| Coiled-coil domain containing 50                                                                                | <i>Ccdc50</i>        | -1,6187775 | 0,00784987 |
| GRAM domain containing 1A                                                                                       | <i>Gramd1a</i>       | -1,6185009 | 0,00015574 |
| Peroxisomal biogenesis factor 11 alpha                                                                          | <i>Pex11a</i>        | -1,6172594 | 0,00119403 |
| Apolipoprotein D                                                                                                | <i>Apod</i>          | -1,6166171 | 0,00244809 |
| Purinergic receptor P2X, ligand-gated ion channel 4                                                             | <i>P2rx4</i>         | -1,6160472 | 0,00011537 |
| ELOVL family member 7, elongation of long chain fatty acids (yeast)                                             | <i>Elovl7</i>        | -1,6158231 | 0,00513337 |
| Interleukin 17D                                                                                                 | <i>Il17d</i>         | -1,6153522 | 0,00021113 |
| Thymosin, beta 10                                                                                               | <i>Tmsb10</i>        | -1,6149752 | 0,00022581 |
| Cdna sequence BC002059                                                                                          | <i>BC002059</i>      | -1,6144678 | 0,00036991 |
| Pelota homolog (Drosophila)                                                                                     | <i>Pelo</i>          | -1,6135246 | 0,00077938 |
| Synaptonemal complex central element protein 2                                                                  | <i>Syce2</i>         | -1,6133699 | 7,23E-05   |
| Synaptotagmin XVII                                                                                              | <i>Syt17</i>         | -1,6130957 | 0,00012009 |
| Heterogeneous nuclear ribonucleoprotein U-like 2                                                                | <i>Hnrnpul2</i>      | -1,6129811 | 2,22E-05   |
| Nucleolin                                                                                                       | <i>Ncl</i>           | -1,6127657 | 5,46E-05   |
| CCCTC-binding factor                                                                                            | <i>Ctcf</i>          | -1,612256  | 0,0001105  |
| Phospholipase A1 member A                                                                                       | <i>Pla1a</i>         | -1,6121011 | 6,02E-05   |
| LPS-induced TN factor                                                                                           | <i>Litaf</i>         | -1,61145   | 9,22E-05   |
| Lepreca-like 4                                                                                                  | <i>Leprel4</i>       | -1,6110822 | 0,00012759 |
| Cardiotrophin-like cytokine factor 1                                                                            | <i>Clcf1</i>         | -1,6110601 | 0,00117959 |
| Protein kinase domain containing, cytoplasmic                                                                   | <i>Pkdcc</i>         | -1,6107502 | 0,00324651 |
| NOP58 ribonucleoprotein                                                                                         | <i>Nop58</i>         | -1,6107403 | 0,00012551 |
| Heterogeneous nuclear ribonucleoprotein A2/B1                                                                   | <i>Hnrnpa2b1</i>     | -1,6107302 | 9,67E-05   |
| Nrde-2 necessary for RNA interference, domain containing                                                        | <i>Nrde2</i>         | -1,6088905 | 6,10E-05   |
| Ribosomal protein S6 kinase polypeptide 1                                                                       | <i>Rps6ka1</i>       | -1,6083645 | 0,00277542 |
| RIKEN cdna 2310039H08 gene                                                                                      | <i>2310039H08Rik</i> | -1,6077698 | 0,00037166 |
| Protein phosphatase 1, catalytic subunit, beta isoform                                                          | <i>Ppp1cb</i>        | -1,6071978 | 0,00411528 |
| Pseudouridine synthase 1                                                                                        | <i>Pus1</i>          | -1,6064225 | 7,12E-05   |
| Proteasome (prosome, macropain) 26S subunit, atpase, 4                                                          | <i>Psmc4</i>         | -1,6063524 | 0,00038058 |
| DBF4 homolog (S. Cerevisiae)                                                                                    | <i>Dbf4</i>          | -1,604072  | 0,00018042 |
| Potassium channel tetramerisation domain containing 5                                                           | <i>Kctd5</i>         | -1,6034164 | 6,40E-05   |
| DCN1, defective in cullin neddylation 1, domain containing 5 (S. Cerevisiae)                                    | <i>Dcun1d5</i>       | -1,6030109 | 0,00038754 |
| Erythrocyte protein band 4.1-like 3                                                                             | <i>Epb4.1l3</i>      | -1,6028884 | 7,24E-05   |
| Regulator of G-protein signaling 4                                                                              | <i>Rgs4</i>          | -1,6028263 | 0,00014946 |
| Transcriptional regulator, SIN3B (yeast)                                                                        | <i>Sin3b</i>         | -1,6025148 | 0,00020361 |
| Sin3 associated polypeptide                                                                                     | <i>Sap30</i>         | -1,6024881 | 0,00016582 |
| Ubiquitination factor E4A                                                                                       | <i>Ube4a</i>         | -1,6016554 | 0,00213282 |
| SWI/SNF-related, matrix-associated actin-dependent regulator of chromatin, subfamily a, containing DEAD/H box 1 | <i>Smardc1</i>       | -1,6016258 | 0,00025804 |
| Endothelin converting enzyme 2                                                                                  | <i>Ece2</i>          | -1,6014467 | 5,98E-05   |
| NOP2 nucleolar protein                                                                                          | <i>Nop2</i>          | -1,6004698 | 0,0002728  |
| Caspase 8 associated protein 2                                                                                  | <i>Casp8ap2</i>      | -1,600105  | 0,00091433 |

|                                                                                               |                                                                    |            |            |
|-----------------------------------------------------------------------------------------------|--------------------------------------------------------------------|------------|------------|
| A disintegrin-like and metallopeptidase (reprolysin type) with thrombospondin type 1 motif, 7 | <i>Adamts7</i>                                                     | -1,6000736 | 0,00061957 |
| Lysine rich nucleolar protein 1                                                               | <i>Knop1</i>                                                       | -1,5998158 | 4,63E-05   |
| RIKEN cdna 1600012H06 gene                                                                    | <i>1600012H06Rik</i>                                               | -1,5996929 | 0,00019561 |
| Sprouty homolog 1 (Drosophila)                                                                | <i>Spry1</i>                                                       | -1,5989888 | 0,00015574 |
| Cathepsin A                                                                                   | <i>Ctsa</i>                                                        | -1,5989635 | 2,02E-05   |
| RIKEN cdna 2010204K13 gene                                                                    | <i>2010204K13Rik</i>                                               | -1,5984936 | 0,0010052  |
| Zinc finger protein, multitype 1                                                              | <i>Zfp1</i>                                                        | -1,59836   | 0,00112212 |
| Autophagy related 101                                                                         | <i>Atg101</i>                                                      | -1,5983171 | 0,00013925 |
| NEDD8 activating enzyme E1 subunit 1                                                          | <i>Nae1</i>                                                        | -1,5981574 | 2,05E-05   |
| Protein kinase, cgmp-dependent, type I                                                        | <i>Prkg1</i>                                                       | -1,5978094 | 0,00414604 |
| Seryl-aminoacyl-trna synthetase                                                               | <i>Sars</i>                                                        | -1,597359  | 0,00073612 |
| Chitinase domain containing 1                                                                 | <i>Chid1</i>                                                       | -1,5972823 | 0,00157771 |
| Heme oxygenase (decycling) 1                                                                  | <i>Hmox1</i>                                                       | -1,5965774 | 9,04E-05   |
| Methyltransferase like 9                                                                      | <i>Mettl9</i>                                                      | -1,5962826 | 0,00072435 |
| Bone marrow stromal cell antigen 2                                                            | <i>Bst2</i>                                                        | -1,5957651 | 0,00319001 |
| Family with sequence similarity 76, member B                                                  | <i>Fam76b</i>                                                      | -1,5956001 | 0,00626604 |
| Rho/rac guanine nucleotide exchange factor (GEF) 2                                            | <i>Arhgef2</i>                                                     | -1,5939824 | 0,00040544 |
| Voltage-dependent anion channel 3                                                             | <i>Vdac3</i>                                                       | -1,5937697 | 2,65E-05   |
| Kelch repeat and BTB (POZ) domain containing 2                                                | <i>Kbtbd2</i>                                                      | -1,5936355 | 0,00018925 |
| Dihydroorotate dehydrogenase                                                                  | <i>Dhodh</i>                                                       | -1,5935299 | 0,00029781 |
| ATP-binding cassette, sub-family B (MDR/TAP), member 10                                       | <i>Abcb10</i>                                                      | -1,5932796 | 0,000767   |
| GTP binding protein 4                                                                         | <i>Gtpbp4</i>                                                      | -1,592716  | 0,00620963 |
| Xylulokinase homolog (H. Influenzae)                                                          | <i>Xylb</i>                                                        | -1,592428  | 0,00710783 |
| Solute carrier family 30 (zinc transporter), member 6                                         | <i>Slc30a6</i>                                                     | -1,5917812 | 0,00014834 |
| ESF1, nucleolar pre-rna processing protein, homolog (S. Cerevisiae)                           | <i>Esf1</i>                                                        | -1,591155  | 6,75E-05   |
| ADP-ribosylation factor-like 2 binding protein                                                | <i>Arl2bp</i>                                                      | -1,5903187 | 2,56E-05   |
| 60S ribosomal protein L23-like /// 60S ribosomal protein L23-like /// ribosomal protein L23   | <i>LOC100044627 ///</i><br><i>LOC100862455 ///</i><br><i>Rpl23</i> | -1,5895855 | 2,95E-05   |
| RE1-silencing transcription factor                                                            | <i>Rest</i>                                                        | -1,5895713 | 0,00078573 |
| Splicing factor 3b, subunit 3                                                                 | <i>Sf3b3</i>                                                       | -1,5887219 | 0,00024381 |
| Trans-acting transcription factor 3                                                           | <i>Sp3</i>                                                         | -1,5880342 | 0,00103841 |
| Arsenic (+3 oxidation state) methyltransferase                                                | <i>As3mt</i>                                                       | -1,5880304 | 0,00253236 |
| Autocrine motility factor receptor                                                            | <i>Amfr</i>                                                        | -1,58783   | 0,00013645 |
| Phosphoglycolate phosphatase                                                                  | <i>Pgp</i>                                                         | -1,5877012 | 0,00037959 |
| Cytochrome b5 reductase 1                                                                     | <i>Cyb5r1</i>                                                      | -1,5873021 | 4,14E-05   |
| AT rich interactive domain 4B (RBP1-like)                                                     | <i>Arid4b</i>                                                      | -1,5870294 | 0,00350918 |
| Small proline-rich protein 2D                                                                 | <i>Spr2d</i>                                                       | -1,586344  | 0,00121184 |
| Guanine nucleotide binding protein (G protein), gamma 10                                      | <i>Gng10</i>                                                       | -1,5858999 | 0,00103461 |
| Solute carrier family 30 (zinc transporter), member 4                                         | <i>Slc30a4</i>                                                     | -1,5857875 | 0,00060497 |
| Solute carrier family 31, member 1                                                            | <i>Slc31a1</i>                                                     | -1,5856256 | 0,0001031  |
| Ring finger protein 2                                                                         | <i>Rnf2</i>                                                        | -1,5848022 | 0,00079475 |



|                                                                                               |                                    |            |            |
|-----------------------------------------------------------------------------------------------|------------------------------------|------------|------------|
| A disintegrin-like and metallopeptidase (reprolysin type) with thrombospondin type 1 motif, 4 | <i>Adamts4</i>                     | -1,5845214 | 0,00018522 |
| GTP binding protein 6 (putative)                                                              | <i>Gtpbp6</i>                      | -1,5840918 | 5,34E-05   |
| S-adenosylhomocysteine hydrolase                                                              | <i>Ahcy</i>                        | -1,5834732 | 3,68E-05   |
| VPS33B interacting protein, apical-basolateral polarity regulator, spe-39 homolog             | <i>Vipas39</i>                     | -1,5823006 | 0,000182   |
| B cell leukemia/lymphoma 6                                                                    | <i>Bcl6</i>                        | -1,5822362 | 7,07E-05   |
| Alpha-N-acetylglucosaminidase (Sanfilippo disease IIIB)                                       | <i>Naglu</i>                       | -1,5820349 | 0,00057057 |
| Early B cell factor 1                                                                         | <i>Ebf1</i>                        | -1,5811952 | 0,00040544 |
| Predicted gene 12942 /// zinc finger, MYM-type 6                                              | <i>Gm12942 ///</i><br><i>Zmym6</i> | -1,5811314 | 0,00037774 |
| Matrix metallopeptidase 12                                                                    | <i>Mmp12</i>                       | -1,5808387 | 0,00164862 |
| Pyruvate dehydrogenase kinase, isoenzyme 1                                                    | <i>Pdk1</i>                        | -1,5804277 | 0,00022991 |
| Transformer 2 beta homolog (Drosophila)                                                       | <i>Tra2b</i>                       | -1,579791  | 7,29E-05   |
| Transcriptional adaptor 2B                                                                    | <i>Tada2b</i>                      | -1,579124  | 0,00033345 |
| Serine/threonine/tyrosine interaction protein                                                 | <i>Styx</i>                        | -1,5790565 | 0,00181844 |
| Trna methyltransferase 11-2                                                                   | <i>Trmt112</i>                     | -1,5789694 | 0,00014046 |
| Glycolipid transfer protein domain containing 1                                               | <i>Gltpd1</i>                      | -1,5789003 | 0,00018926 |
| Cysteine-rich transmembrane module containing 1                                               | <i>Cystm1</i>                      | -1,5775595 | 0,00069874 |
| Ring finger protein, LIM domain interacting                                                   | <i>Rlim</i>                        | -1,5771479 | 0,00049507 |
| Agrin                                                                                         | <i>Agrn</i>                        | -1,5771475 | 3,77E-05   |
| MTERF domain containing 1                                                                     | <i>Mterfd1</i>                     | -1,5769751 | 8,63E-05   |
| Proline-rich nuclear receptor coactivator 1                                                   | <i>Pnrc1</i>                       | -1,576173  | 0,00022424 |
| Ubiquinol-cytochrome c reductase, complex III subunit X                                       | <i>Uqcr10</i>                      | -1,5758552 | 0,00016412 |
| DEAD (Asp-Glu-Ala-Asp) box polypeptide 10                                                     | <i>Ddx10</i>                       | -1,5748652 | 0,00379235 |
| Transmembrane protein 38A                                                                     | <i>Tmem38a</i>                     | -1,5746983 | 0,00294162 |
| UDP-glucose dehydrogenase                                                                     | <i>Ugdh</i>                        | -1,5746845 | 0,00034694 |
| Family with sequence similarity 160, member A2                                                | <i>Fam160a2</i>                    | -1,5746706 | 0,00330528 |
| UDP-glcnac:beta gal beta-1,3-N-acetylglucosaminyltransferase 8                                | <i>B3gnt8</i>                      | -1,5744857 | 0,00375727 |
| Arginine vasopressin-induced 1                                                                | <i>Avpi1</i>                       | -1,5732164 | 0,00031138 |
| BCL2-associated athanogene 5                                                                  | <i>Bag5</i>                        | -1,5731954 | 0,00014117 |
| Transforming growth factor, beta receptor I                                                   | <i>Tgfr1</i>                       | -1,5730722 | 0,00168646 |
| Glomulin, FKBP associated protein                                                             | <i>Glmn</i>                        | -1,5724264 | 0,00127535 |
| Proline-rich polypeptide 3                                                                    | <i>Prr3</i>                        | -1,5717863 | 0,0016397  |
| Hairy and enhancer of split 1 (Drosophila)                                                    | <i>Hes1</i>                        | -1,5715866 | 0,00016588 |
| Spastin                                                                                       | <i>Spast</i>                       | -1,5715566 | 0,00010774 |
| Family with sequence similarity 110, member C                                                 | <i>Fam110c</i>                     | -1,5708922 | 0,00338831 |
| Discoidin domain receptor family, member 1                                                    | <i>Ddr1</i>                        | -1,5700127 | 0,00353513 |
| Nuclear transcription factor-Y gamma                                                          | <i>Nfyyc</i>                       | -1,5696277 | 3,04E-05   |
| Dynein cytoplasmic 1 light intermediate chain 1                                               | <i>Dync1li1</i>                    | -1,5694898 | 3,72E-05   |
| Galactosidase, beta 1                                                                         | <i>Glb1</i>                        | -1,5694741 | 0,00065602 |
| Armado repeat containing, X-linked 3                                                          | <i>Armxc3</i>                      | -1,5693181 | 0,00878164 |
| N(alpha)-acetyltransferase 40, natd catalytic subunit, homolog (S. Cerevisiae)                | <i>Naa40</i>                       | -1,5689224 | 0,00040544 |

|                                                                                                                                |                                         |            |            |
|--------------------------------------------------------------------------------------------------------------------------------|-----------------------------------------|------------|------------|
| X-prolyl aminopeptidase (aminopeptidase P) 1, soluble                                                                          | <i>Xpnpep1</i>                          | -1,5682598 | 0,00016033 |
| Predicted gene 6750 /// predicted pseudogene 7931 /// predicted gene 9525 /// high mobility group nucleosomal binding domain 2 | <i>Gm6750 /// Gm7931 /// Gm9525 ///</i> | -1,5670234 | 7,32E-05   |
| Syntaxin 5A                                                                                                                    | <i>Hmgn2</i><br><i>Stx5a</i>            | -1,5664078 | 0,0002201  |
| Scl/Tal1 interrupting locus                                                                                                    | <i>Stil</i>                             | -1,5658908 | 0,0015582  |
| Latent transforming growth factor beta binding protein 2                                                                       | <i>Ltbp2</i>                            | -1,5654794 | 0,00392732 |
| Zinc finger protein 287                                                                                                        | <i>Zfp287</i>                           | -1,5644674 | 0,00041087 |
| Tripartite motif-containing 25                                                                                                 | <i>Trim25</i>                           | -1,5637133 | 0,00330788 |
| GTP binding protein 2                                                                                                          | <i>Gtpbp2</i>                           | -1,5634807 | 7,62E-05   |
| XPA binding protein 2                                                                                                          | <i>Xab2</i>                             | -1,562909  | 0,00193667 |
| 2'-deoxynucleoside 5'-phosphate N-hydrolase 1                                                                                  | <i>Dnph1</i>                            | -1,5628102 | 5,38E-05   |
| Dishevelled, dsh homolog 1 (Drosophila)                                                                                        | <i>Dvl1</i>                             | -1,5625797 | 0,00080803 |
| Acetyl-Coenzyme A acetyltransferase 1                                                                                          | <i>Acat1</i>                            | -1,5624396 | 0,00053755 |
| Trafficking protein particle complex 5                                                                                         | <i>Trappc5</i>                          | -1,5623832 | 0,00019545 |
| Low density lipoprotein receptor-related protein 2                                                                             | <i>Lrp2</i>                             | -1,5623639 | 0,0032811  |
| Serine (or cysteine) peptidase inhibitor, clade B, member 1b                                                                   | <i>Serpinb1b</i>                        | -1,5620808 | 0,00109685 |
| Homocysteine-inducible, endoplasmic reticulum stress-inducible, ubiquitin-like domain member 1                                 | <i>Herpud1</i>                          | -1,5619283 | 0,00051491 |
| Heterogeneous nuclear ribonucleoprotein H1                                                                                     | <i>Hnrnp1</i>                           | -1,5619047 | 0,00136186 |
| Zinc finger protein 319                                                                                                        | <i>Zfp319</i>                           | -1,5615805 | 9,00E-05   |
| WD repeat domain 45                                                                                                            | <i>Wdr45</i>                            | -1,5615231 | 9,56E-05   |
| CCR4-NOT transcription complex, subunit 7                                                                                      | <i>Cnot7</i>                            | -1,5612462 | 6,16E-05   |
| DNA segment, Chr 1, ERATO Doi 622, expressed                                                                                   | <i>D1Ert622e</i>                        | -1,5605946 | 0,00031974 |
| Cytochrome c oxidase assembly factor 6                                                                                         | <i>Coa6</i>                             | -1,5602601 | 0,00027664 |
| Thymoma viral proto-oncogene 1 interacting protein                                                                             | <i>Aktip</i>                            | -1,5601739 | 0,00017979 |
| Copper chaperone for superoxide dismutase                                                                                      | <i>Ccs</i>                              | -1,5599392 | 6,92E-05   |
| Natriuretic peptide receptor 2                                                                                                 | <i>Npr2</i>                             | -1,5598492 | 0,0011614  |
| MAP kinase-interacting serine/threonine kinase 1                                                                               | <i>Mknk1</i>                            | -1,5598158 | 0,00092676 |
| Solute carrier family 35, member B2                                                                                            | <i>Slc35b2</i>                          | -1,559041  | 6,60E-05   |
| Insulin-like growth factor 2 mrna binding protein 2                                                                            | <i>Igf2bp2</i>                          | -1,5586479 | 6,65E-05   |
| Mitochondrial ribosomal protein S30                                                                                            | <i>Mrps30</i>                           | -1,5584129 | 0,00011525 |
| Cullin 4B                                                                                                                      | <i>Cul4b</i>                            | -1,5581903 | 0,00074507 |
| Cytochrome c oxidase subunit IV isoform 1                                                                                      | <i>Cox4i1</i>                           | -1,5581637 | 9,41E-05   |
| Interferon regulatory factor 2 binding protein 1                                                                               | <i>Irf2bp1</i>                          | -1,5580096 | 0,00115932 |
| Insulin receptor                                                                                                               | <i>Insr</i>                             | -1,5560514 | 0,00651917 |
| SWI/SNF related, matrix associated, actin dependent regulator of chromatin, subfamily a, member 5                              | <i>Smarca5</i>                          | -1,5557941 | 0,00022651 |
| Synaptopodin 2                                                                                                                 | <i>Synpo2</i>                           | -1,5556218 | 6,22E-05   |
| Excision repair cross-complementing rodent repair deficiency, complementation group 1                                          | <i>Ercc1</i>                            | -1,5554438 | 0,00015334 |
| TBC1 domain family, member 8                                                                                                   | <i>Tbc1d8</i>                           | -1,5554358 | 0,00161354 |
| MYB binding protein (P160) 1a                                                                                                  | <i>Mybbp1a</i>                          | -1,5554303 | 0,00246176 |
| Ubiquitin specific peptidase 24                                                                                                | <i>Usp24</i>                            | -1,5553654 | 0,00023055 |
| PC4 and SFRS1 interacting protein 1                                                                                            | <i>Psip1</i>                            | -1,5548455 | 0,00044193 |

|                                                                                              |                                 |            |            |
|----------------------------------------------------------------------------------------------|---------------------------------|------------|------------|
| Carnitine deficiency-associated gene expressed in ventricle 3                                | <i>Cdv3</i>                     | -1,5543881 | 0,00863341 |
| Protein disulfide isomerase associated 5                                                     | <i>Pdia5</i>                    | -1,554181  | 0,00050797 |
| Phosphatidylinositol glycan anchor biosynthesis, class T                                     | <i>Pigt</i>                     | -1,5540167 | 0,00154221 |
| Cytochrome P450, family 2, subfamily c, polypeptide 44                                       | <i>Cyp2c44</i>                  | -1,5539661 | 0,00027488 |
| Armadillo repeat containing 6                                                                | <i>Armc6</i>                    | -1,5535884 | 0,00061471 |
| Zinc finger protein 282                                                                      | <i>Zfp282</i>                   | -1,5534526 | 0,00103669 |
| Protein phosphatase 1B, magnesium dependent, beta isoform                                    | <i>Ppm1b</i>                    | -1,5532801 | 8,06E-05   |
| Neurolysin (metallopeptidase M3 family)                                                      | <i>Nln</i>                      | -1,5529135 | 0,00018715 |
| Apolipoprotein L 9a /// apolipoprotein L 9b                                                  | <i>Apol9a /// Apol9b</i>        | -1,5528074 | 0,00112076 |
| Nucleoporin 62                                                                               | <i>Nup62</i>                    | -1,5527522 | 9,85E-05   |
| Importin 7                                                                                   | <i>Ipo7</i>                     | -1,5524443 | 0,00059926 |
| Zinc finger, AN1-type domain 5                                                               | <i>Zfand5</i>                   | -1,5519697 | 0,00029073 |
| Tyrosyl-DNA phosphodiesterase 1                                                              | <i>Tdp1</i>                     | -1,5515163 | 0,00032245 |
| Phosphoprotein associated with glycosphingolipid microdomains 1                              | <i>Pag1</i>                     | -1,5514846 | 0,00069949 |
| CTAGE family, member 5                                                                       | <i>Ctage5</i>                   | -1,551471  | 0,0005183  |
| RIKEN cdna 1110037F02 gene                                                                   | <i>1110037F02Rik</i>            | -1,5513856 | 9,09E-05   |
| Janus kinase 2                                                                               | <i>Jak2</i>                     | -1,5511262 | 8,41E-05   |
| Golgi autoantigen, golgin subfamily a, 7                                                     | <i>Golga7</i>                   | -1,5506964 | 0,00169451 |
| Homeobox C4                                                                                  | <i>Hoxc4</i>                    | -1,5504027 | 0,00093316 |
| Ras association (ralgds/AF-6) domain family member 1                                         | <i>Rassf1</i>                   | -1,54938   | 0,00016233 |
| Distal-less homeobox 1                                                                       | <i>Dlx1</i>                     | -1,5491343 | 0,00295685 |
| Trna nucleotidyl transferase, CCA-adding, 1                                                  | <i>Trnt1</i>                    | -1,5488686 | 0,00206131 |
| Structural maintenance of chromosomes 3                                                      | <i>Smc3</i>                     | -1,5487926 | 0,00011419 |
| T cell specific gtpase 1 /// T cell specific gtpase 2                                        | <i>Tgtp1 /// Tgtp2</i>          | -1,5483196 | 0,00511393 |
| RIKEN cdna 6330509M05 gene /// solute carrier family 9 (sodium/hydrogen exchanger), member 7 | <i>6330509M05Rik /// Slc9a7</i> | -1,5469798 | 0,00382254 |
| MIS12 homolog (yeast)                                                                        | <i>Mis12</i>                    | -1,5468822 | 0,00017326 |
| SH3-domain binding protein 4                                                                 | <i>Sh3bp4</i>                   | -1,5463492 | 0,00025432 |
| Membrane-spanning 4-domains, subfamily A, member 4B                                          | <i>Ms4a4b</i>                   | -1,5460955 | 0,0016836  |
| Caveolin 1, caveolae protein                                                                 | <i>Cav1</i>                     | -1,5460451 | 4,37E-05   |
| Ubiquitin A-52 residue ribosomal protein fusion product 1                                    | <i>Uba52</i>                    | -1,5460369 | 4,45E-05   |
| Breast cancer anti-estrogen resistance 1                                                     | <i>Bcar1</i>                    | -1,5455806 | 0,00034882 |
| Tripartite motif-containing 30A /// tripartite motif-containing 30D                          | <i>Trim30a /// Trim30d</i>      | -1,5444575 | 0,00160174 |
| Lysophosphatidylglycerol acyltransferase 1                                                   | <i>Lpgat1</i>                   | -1,544307  | 0,0038623  |
| DNA segment, Chr 17, human D6S56E 5                                                          | <i>D17H6S56E-5</i>              | -1,5442883 | 0,00017517 |
| CTD nuclear envelope phosphatase 1 regulatory subunit 1                                      | <i>Cnep1r1</i>                  | -1,5437151 | 3,72E-05   |
| Serine/threonine kinase receptor associated protein                                          | <i>Strap</i>                    | -1,5434359 | 0,00023918 |
| Downstream neighbor of SON                                                                   | <i>Donson</i>                   | -1,5429832 | 0,00057512 |
| Zinc finger protein 955B                                                                     | <i>Zfp955b</i>                  | -1,5426904 | 0,00304786 |

|                                                                                                            |                 |            |            |
|------------------------------------------------------------------------------------------------------------|-----------------|------------|------------|
| Protein-kinase, interferon-inducible double stranded RNA dependent inhibitor, repressor of (P58 repressor) | <i>Prkrir</i>   | -1,5425866 | 0,00020066 |
| Proline, glutamic acid and leucine rich protein 1                                                          | <i>Pelp1</i>    | -1,5419286 | 0,00035375 |
| Protein tyrosine phosphatase, receptor type, O                                                             | <i>Ptpro</i>    | -1,5418063 | 0,00036139 |
| Required for meiotic nuclear division 5 homolog A (S. Cerevisiae)                                          | <i>Rmnd5a</i>   | -1,5412556 | 0,00062039 |
| CKLF-like MARVEL transmembrane domain containing 6                                                         | <i>Cmtm6</i>    | -1,5399817 | 0,0008353  |
| Ets2 repressor factor                                                                                      | <i>Erf</i>      | -1,53982   | 0,0037098  |
| LSM4 homolog, U6 small nuclear RNA associated (S. Cerevisiae)                                              | <i>Lsm4</i>     | -1,539085  | 0,0001219  |
| Histocompatibility 2, class II, locus dma                                                                  | <i>H2-dma</i>   | -1,5380152 | 0,00231399 |
| Solute carrier organic anion transporter family, member 3a1                                                | <i>Slco3a1</i>  | -1,537501  | 0,00042588 |
| Polyhomeotic-like 2 (Drosophila)                                                                           | <i>Phc2</i>     | -1,5368125 | 0,00037404 |
| Poliovirus receptor                                                                                        | <i>Pvr</i>      | -1,5366522 | 9,67E-05   |
| Protein kinase D3                                                                                          | <i>Prkd3</i>    | -1,5365622 | 0,00012009 |
| Polymerase (RNA) I polypeptide D                                                                           | <i>Polr1d</i>   | -1,5360775 | 0,00019561 |
| Nuclear factor of activated T cells, cytoplasmic, calcineurin dependent 4                                  | <i>Nfatc4</i>   | -1,5360014 | 0,00140729 |
| Plexin domain containing 1                                                                                 | <i>Plxdc1</i>   | -1,5359795 | 7,59E-05   |
| Centromere protein N                                                                                       | <i>Cenpn</i>    | -1,5355461 | 0,000649   |
| Cleavage and polyadenylation specific factor 3-like                                                        | <i>Cpsf3l</i>   | -1,5355015 | 0,00010121 |
| SNW domain containing 1                                                                                    | <i>Snw1</i>     | -1,5352348 | 0,00017721 |
| Transmembrane protein 53                                                                                   | <i>Tmem53</i>   | -1,5341039 | 0,00031523 |
| Small integral membrane protein 12                                                                         | <i>Smim12</i>   | -1,5340799 | 0,00013925 |
| Small nuclear ribonucleoprotein 48 (U11/U12)                                                               | <i>Snrnp48</i>  | -1,5336962 | 0,00025653 |
| Glycoprotein galactosyltransferase alpha 1, 3                                                              | <i>Ggta1</i>    | -1,5334589 | 6,22E-05   |
| Ribosomal protein S6 kinase, polypeptide 4                                                                 | <i>Rps6ka4</i>  | -1,5327599 | 0,00123895 |
| Large subunit gtpase 1 homolog (S. Cerevisiae)                                                             | <i>Lsg1</i>     | -1,5315097 | 0,0006434  |
| Synovial apoptosis inhibitor 1, synoviolin                                                                 | <i>Syvn1</i>    | -1,5314108 | 0,00106949 |
| Fos-like antigen 2                                                                                         | <i>Fosl2</i>    | -1,5306846 | 0,00377944 |
| ATPase type 13A1                                                                                           | <i>Atp13a1</i>  | -1,5305868 | 0,00036145 |
| GLIS family zinc finger 2                                                                                  | <i>Glis2</i>    | -1,5304863 | 9,81E-05   |
| Multivesicular body subunit 12B                                                                            | <i>Mvb12b</i>   | -1,5300873 | 0,0001283  |
| Microtubule-associated protein 1 light chain 3 alpha                                                       | <i>Map1lc3a</i> | -1,5299054 | 6,21E-05   |
| Ectonucleotide pyrophosphatase/phosphodiesterase 3                                                         | <i>Enpp3</i>    | -1,5294872 | 0,0016232  |
| Mckusick-Kaufman syndrome                                                                                  | <i>Mkks</i>     | -1,5287398 | 0,00386412 |
| SFT2 domain containing 2                                                                                   | <i>Sft2d2</i>   | -1,528457  | 0,00048544 |
| Egl-9 family hypoxia-inducible factor 1                                                                    | <i>Egln1</i>    | -1,5276321 | 5,43E-05   |
| Regulator of chromosome condensation (RCC1) and BTB (POZ) domain containing protein 2                      | <i>Rcbtb2</i>   | -1,5270763 | 0,00942401 |
| KDEL (Lys-Asp-Glu-Leu) containing 1                                                                        | <i>Kdelc1</i>   | -1,5268901 | 8,37E-05   |
| Stress-induced phosphoprotein 1                                                                            | <i>Stip1</i>    | -1,5267179 | 0,0001249  |
| Interleukin 33                                                                                             | <i>Il33</i>     | -1,5260179 | 8,50E-05   |
| GINS complex subunit 4 (Sld5 homolog)                                                                      | <i>Gins4</i>    | -1,5256982 | 0,00010221 |
| General transcription factor II H, polypeptide 1                                                           | <i>Gtf2h1</i>   | -1,5253671 | 0,00015993 |

|                                                                                          |                               |            |            |
|------------------------------------------------------------------------------------------|-------------------------------|------------|------------|
| NOP14 nucleolar protein                                                                  | <i>Nop14</i>                  | -1,5252963 | 0,00034509 |
| Mitochondrial ribosomal protein L37                                                      | <i>Mrpl37</i>                 | -1,5250668 | 4,05E-05   |
| Enoyl Coenzyme A hydratase domain containing 3                                           | <i>Echdc3</i>                 | -1,5240383 | 0,00262579 |
| SET nuclear oncogene                                                                     | <i>Set</i>                    | -1,5234237 | 5,65E-05   |
| Ataxin 7-like 1                                                                          | <i>Atxn7l1</i>                | -1,5233955 | 0,00054824 |
| Phenylalanyl-trna synthetase, alpha subunit                                              | <i>Farsa</i>                  | -1,5220338 | 0,00011139 |
| Casitas B-lineage lymphoma                                                               | <i>Cbl</i>                    | -1,5219564 | 0,00087005 |
| Solute carrier family 19 (folate transporter), member 1                                  | <i>Slc19a1</i>                | -1,5219038 | 0,00023566 |
| Regulator of chromosome condensation 1                                                   | <i>Rcc1</i>                   | -1,521769  | 0,00018884 |
| Signal peptidase complex subunit 3 homolog (S. Cerevisiae)                               | <i>Spcs3</i>                  | -1,5217093 | 0,0018725  |
| Son of sevenless homolog 2 (Drosophila)                                                  | <i>Sos2</i>                   | -1,5216326 | 0,00513381 |
| Isoprenylcysteine carboxyl methyltransferase                                             | <i>Icmt</i>                   | -1,5209236 | 0,00015123 |
| Zinc finger protein 52                                                                   | <i>Zfp52</i>                  | -1,5203608 | 0,00209686 |
| Methyltransferase like 6                                                                 | <i>Mettl6</i>                 | -1,5202713 | 0,00194351 |
| TAF6-like RNA polymerase II, p300/CBP-associated factor (PCAF)-associated factor         | <i>Taf6l</i>                  | -1,5196983 | 0,00046279 |
| Mitochondrial ribosomal protein L34                                                      | <i>Mrpl34</i>                 | -1,5188728 | 0,00032516 |
| ER membrane protein complex subunit 6                                                    | <i>Emc6</i>                   | -1,518745  | 0,00016797 |
| Heat shock protein 3                                                                     | <i>Hspb3</i>                  | -1,5186855 | 0,00025267 |
| Cutc copper transporter homolog (E.coli)                                                 | <i>Cutc</i>                   | -1,5181796 | 0,00346746 |
| Twisted gastrulation homolog 1 (Drosophila)                                              | <i>Twsg1</i>                  | -1,5181275 | 0,00013646 |
| Conserved helix-loop-helix ubiquitous kinase                                             | <i>Chuk</i>                   | -1,5178294 | 0,00398308 |
| Transmembrane protein 167                                                                | <i>Tmem167</i>                | -1,5176239 | 0,0002807  |
| Sterile alpha motif domain containing 8                                                  | <i>Samd8</i>                  | -1,51758   | 0,00089917 |
| Forty-two-three domain containing 1                                                      | <i>Fytd1</i>                  | -1,5173989 | 0,0007858  |
| Family with sequence similarity 45, member A                                             | <i>Fam45a</i>                 | -1,5168882 | 0,00029865 |
| Superoxide dismutase 1, soluble                                                          | <i>Sod1</i>                   | -1,5168822 | 6,17E-05   |
| Ftsj homolog 3 (E. Coli)                                                                 | <i>Ftsj3</i>                  | -1,5168068 | 0,00012544 |
| Mpv17 transgene, kidney disease mutant-like                                              | <i>Mpv17l</i>                 | -1,5159717 | 0,00092442 |
| YTH domain containing 1                                                                  | <i>Ythdc1</i>                 | -1,5158204 | 0,00016621 |
| PET100 homolog (S. Cerevisiae)                                                           | <i>Pet100</i>                 | -1,5153093 | 0,0031974  |
| Expressed sequence AI314180                                                              | <i>AI314180</i>               | -1,5151743 | 0,00032385 |
| Chromodomain helicase DNA binding protein 7                                              | <i>Chd7</i>                   | -1,5151176 | 0,00218315 |
| Leucine rich repeat containing 41                                                        | <i>Lrrc41</i>                 | -1,5151029 | 8,98E-05   |
| Myosin regulatory light chain interacting protein                                        | <i>Myliip</i>                 | -1,514539  | 0,00035636 |
| Expressed sequence AI596198                                                              | <i>AI596198</i>               | -1,5126882 | 0,00047845 |
| F-box protein 22                                                                         | <i>Fbxo22</i>                 | -1,510696  | 0,00041087 |
| Microtubule-associated protein, RP/EB family, member 2                                   | <i>Mapre2</i>                 | -1,5105506 | 0,00587783 |
| Transducin-like enhancer of split 3, homolog of Drosophila E(spl)                        | <i>Tle3</i>                   | -1,509958  | 0,00151792 |
| DNA-damage inducible protein 2 /// regulatory solute carrier protein, family 1, member 1 | <i>Ddi2</i> /// <i>Rsc1a1</i> | -1,5085249 | 9,94E-05   |
| Jun D proto-oncogene                                                                     | <i>Jund</i>                   | -1,5078434 | 0,00093072 |
| V-rel reticuloendotheliosis viral oncogene homolog A (avian)                             | <i>Rela</i>                   | -1,5075491 | 0,00044442 |

|                                                                                                                     |                                                      |            |            |
|---------------------------------------------------------------------------------------------------------------------|------------------------------------------------------|------------|------------|
| Bone morphogenetic protein receptor, type 1B                                                                        | <i>Bmpr1b</i>                                        | -1,5073987 | 0,00390023 |
| HERPUD family member 2                                                                                              | <i>Herpud2</i>                                       | -1,5073818 | 0,00027973 |
| Myod family inhibitor                                                                                               | <i>Mdfr</i>                                          | -1,5069805 | 0,00449462 |
| Hippocampus abundant transcript-like 1                                                                              | <i>Hiatl1</i>                                        | -1,5067789 | 0,00453329 |
| Leucine zipper, putative tumor suppressor 2                                                                         | <i>Lzts2</i>                                         | -1,5064816 | 0,00021579 |
| Microtubule-associated protein 1S                                                                                   | <i>Map1s</i>                                         | -1,5063622 | 0,00011683 |
| Predicted pseudogene 5848 /// small nuclear ribonucleoprotein D2                                                    | <i>Gm5848 /// Snrpd2</i>                             | -1,505755  | 9,93E-05   |
| ATPase, Ca++ transporting, cardiac muscle, slow twitch 2                                                            | <i>Atp2a2</i>                                        | -1,5053198 | 5,88E-05   |
| Dipeptidylpeptidase 6                                                                                               | <i>Dpp6</i>                                          | -1,5051077 | 0,0081124  |
| AF4/FMR2 family, member 4                                                                                           | <i>Aff4</i>                                          | -1,5039593 | 0,00224768 |
| Predicted gene, 21596 /// predicted gene 6115 /// high mobility group box 1 /// high mobility group protein B1-like | <i>Gm21596 /// Gm6115 /// Hmgb1 /// LOC102635075</i> | -1,5031386 | 0,00483942 |
| E26 avian leukemia oncogene 1, 5' domain                                                                            | <i>Ets1</i>                                          | -1,5030763 | 0,00035606 |
| Akirin 2                                                                                                            | <i>Akirin2</i>                                       | -1,5021957 | 0,00015766 |
| CLP1, cleavage and polyadenylation factor I subunit                                                                 | <i>Clp1</i>                                          | -1,5018862 | 0,00041727 |
| Mitochondrial ribosomal protein L21                                                                                 | <i>Mrpl21</i>                                        | -1,499967  | 0,00109431 |
| SAC3 domain containing 1                                                                                            | <i>Sac3d1</i>                                        | -1,4999473 | 0,00016344 |
| Progesterone and adiponectin receptor family member VII                                                             | <i>Paqr7</i>                                         | -1,4998693 | 0,00028222 |
| Zinc finger protein 105                                                                                             | <i>Zfp105</i>                                        | -1,4995911 | 0,00089917 |
| Speckle-type POZ protein                                                                                            | <i>Spop</i>                                          | -1,4995115 | 0,00049011 |
| Coiled-coil domain containing 58                                                                                    | <i>Ccdc58</i>                                        | -1,499396  | 0,00012759 |
| Ubiquinol-cytochrome c reductase, Rieske iron-sulfur polypeptide 1                                                  | <i>Uqcrrf1</i>                                       | -1,4993942 | 0,00016747 |
| Z-DNA binding protein 1                                                                                             | <i>Zbp1</i>                                          | -1,4990131 | 0,00056033 |
| Poliovirus receptor-related 3                                                                                       | <i>Pvr13</i>                                         | -1,4987482 | 0,00108705 |
| GTP binding protein 3                                                                                               | <i>Gtpbp3</i>                                        | -1,4986328 | 0,00024769 |
| Dynactin 6                                                                                                          | <i>Dctn6</i>                                         | -1,4985188 | 0,00060206 |
| Ssu72 RNA polymerase II CTD phosphatase homolog (yeast)                                                             | <i>Ssu72</i>                                         | -1,4980409 | 0,00059919 |
| ADP-ribosylation factor-like 14 effector protein                                                                    | <i>Arl14ep</i>                                       | -1,4980237 | 0,00239958 |
| Human immunodeficiency virus type I enhancer binding protein 1                                                      | <i>Hivep1</i>                                        | -1,4973087 | 0,00116956 |
| Rho GTPase activating protein 21                                                                                    | <i>Arhgap21</i>                                      | -1,4962956 | 0,00024548 |
| Eph receptor A2                                                                                                     | <i>Epha2</i>                                         | -1,4962259 | 0,00036145 |
| Solute carrier family 2 (facilitated glucose transporter), member 10                                                | <i>Slc2a10</i>                                       | -1,4957242 | 0,00813973 |
| Pre B cell leukemia homeobox 1                                                                                      | <i>Pbx1</i>                                          | -1,4956351 | 0,00332683 |
| Leucine rich repeat containing 8 family, member C                                                                   | <i>Lrrc8c</i>                                        | -1,4955783 | 0,0011614  |
| Zinc finger, MYM-type 5                                                                                             | <i>Zmym5</i>                                         | -1,4952664 | 0,00029405 |
| Signal transducing adaptor molecule (SH3 domain and ITAM motif) 1                                                   | <i>Stam</i>                                          | -1,4945348 | 0,00195184 |
| Elongation of very long chain fatty acids (FEN1/Elo2, SUR4/Elo3, yeast)-like 1                                      | <i>Elovl1</i>                                        | -1,4944936 | 0,00047301 |
| Shroom family member 1                                                                                              | <i>Shroom1</i>                                       | -1,4943869 | 0,00101697 |
| ATPase, Na+/K+ transporting, beta 3 polypeptide                                                                     | <i>Atp1b3</i>                                        | -1,4943073 | 0,00106932 |
| Protein tyrosine phosphatase, non-receptor type 6                                                                   | <i>Ptpn6</i>                                         | -1,4930416 | 0,00063388 |

|                                                                                |                         |            |            |
|--------------------------------------------------------------------------------|-------------------------|------------|------------|
| ATP-binding cassette, sub-family B (MDR/TAP), member 1A                        | <i>Abcb1a</i>           | -1,4925482 | 0,00793449 |
| Polymerase (RNA) III (DNA directed) polypeptide E                              | <i>Polr3e</i>           | -1,4925066 | 0,0004915  |
| Predicted gene 4604 /// ribosomal protein L36                                  | <i>Gm4604 /// Rpl36</i> | -1,4924654 | 0,00087345 |
| Kruppel-like factor 10                                                         | <i>Klf10</i>            | -1,4923209 | 0,0001212  |
| Zinc finger protein 948                                                        | <i>Zfp948</i>           | -1,4922226 | 0,0006434  |
| U6 snrna biogenesis 1                                                          | <i>Urb1</i>             | -1,4921668 | 0,00022006 |
| Zinc finger protein 26                                                         | <i>Zfp26</i>            | -1,491224  | 0,00075525 |
| Cytochrome c oxidase subunit viia polypeptide 2-like                           | <i>Cox7a2l</i>          | -1,491079  | 0,00012338 |
| Basic leucine zipper and W2 domains 2                                          | <i>Bzw2</i>             | -1,4910212 | 7,51E-05   |
| Anaphase promoting complex subunit 1                                           | <i>Anapc1</i>           | -1,4909772 | 0,0001229  |
| Ribosomal protein S25                                                          | <i>Rps25</i>            | -1,4905657 | 0,00041412 |
| CD209g antigen                                                                 | <i>Cd209g</i>           | -1,4897439 | 0,00381138 |
| Ribosomal protein L7-like 1                                                    | <i>Rpl7l1</i>           | -1,4891121 | 7,95E-05   |
| Translocase of inner mitochondrial membrane 10B                                | <i>Timm10b</i>          | -1,4890563 | 0,00044519 |
| Hermansky-Pudlak syndrome 4 homolog (human)                                    | <i>Hps4</i>             | -1,4883092 | 0,00073207 |
| Meteorin, glial cell differentiation regulator-like                            | <i>Metrl</i>            | -1,4881997 | 0,00039907 |
| Single-stranded DNA binding protein 2                                          | <i>Ssbp2</i>            | -1,4878188 | 0,00024946 |
| Zinc finger protein 65 /// zinc finger protein 738                             | <i>Zfp65 /// Zfp738</i> | -1,4875205 | 0,00305244 |
| FK506 binding protein 9                                                        | <i>Fkbp9</i>            | -1,4868795 | 0,00016866 |
| Mitochondrial ribosomal protein L16                                            | <i>Mrpl16</i>           | -1,4868622 | 0,00010157 |
| Transmembrane protein 62                                                       | <i>Tmem62</i>           | -1,4867622 | 0,00178235 |
| Glia maturation factor, beta                                                   | <i>Gmfb</i>             | -1,4858794 | 0,00594102 |
| Eukaryotic translation initiation factor 3, subunit C                          | <i>Eif3c</i>            | -1,4856557 | 0,00016647 |
| X-linked inhibitor of apoptosis                                                | <i>Xiap</i>             | -1,4839054 | 0,00034952 |
| Polymerase (RNA) I polypeptide B                                               | <i>Polr1b</i>           | -1,4838789 | 0,00043619 |
| Cytotoxic granule-associated RNA binding protein 1                             | <i>Tia1</i>             | -1,483184  | 0,00024053 |
| Integrin beta 1 (fibronectin receptor beta)                                    | <i>Itgb1</i>            | -1,4830543 | 0,00092938 |
| Cartilage associated protein                                                   | <i>Crtap</i>            | -1,4817813 | 0,00016582 |
| Predicted gene 6910 /// RING1 and YY1 binding protein                          | <i>Gm6910 /// Rybp</i>  | -1,4816607 | 0,00067045 |
| Mindbomb homolog 2 (Drosophila)                                                | <i>Mib2</i>             | -1,4813609 | 0,00092442 |
| Phosphoribosyl pyrophosphate amidotransferase                                  | <i>Ppat</i>             | -1,4809665 | 0,00122391 |
| Myosin, light polypeptide 1                                                    | <i>Myl1</i>             | -1,4806379 | 0,00390013 |
| Scaffold attachment factor B2                                                  | <i>Safb2</i>            | -1,4806333 | 0,00123371 |
| Major facilitator superfamily domain containing 5                              | <i>Mfsd5</i>            | -1,4804435 | 0,00010195 |
| Small nuclear ribonucleoprotein 40 (U5)                                        | <i>Snrnp40</i>          | -1,4802282 | 0,00820339 |
| Ras-related GTP binding C                                                      | <i>Rragc</i>            | -1,4800545 | 0,00012021 |
| BMP2 inducible kinase                                                          | <i>Bmp2k</i>            | -1,4798024 | 0,00104695 |
| Ring finger and WD repeat domain 3                                             | <i>Rfwd3</i>            | -1,4795076 | 0,00011171 |
| Luc7 homolog (S. Cerevisiae)-like                                              | <i>Luc7l</i>            | -1,4793491 | 0,00046263 |
| ERO1-like (S. Cerevisiae)                                                      | <i>Ero1l</i>            | -1,4793302 | 0,00123988 |
| Ubiquitin specific peptidase 18                                                | <i>Usp18</i>            | -1,4791648 | 0,00010009 |
| F-box and leucine-rich repeat protein 12                                       | <i>Fbxl12</i>           | -1,4791078 | 0,00229091 |
| Solute carrier family 7 (cationic amino acid transporter, y+ system), member 5 | <i>Slc7a5</i>           | -1,4787905 | 0,00746782 |

|                                                                                          |                                                         |            |            |
|------------------------------------------------------------------------------------------|---------------------------------------------------------|------------|------------|
| Heterogeneous nuclear ribonucleoprotein D-like                                           | <i>Hnrnpdl</i>                                          | -1,4780413 | 0,0008847  |
| AT rich interactive domain 5A (MRF1-like)                                                | <i>Arid5a</i>                                           | -1,477457  | 0,0004965  |
| Glucose-fructose oxidoreductase domain containing 2                                      | <i>Gfod2</i>                                            | -1,4771513 | 0,00010075 |
| Phosphodiesterase 1A, calmodulin-dependent                                               | <i>Pde1a</i>                                            | -1,4770928 | 0,00024171 |
| DPH2 homolog (S. Cerevisiae)                                                             | <i>Dph2</i>                                             | -1,476765  | 0,00079192 |
| Mitochondrial ribosomal protein L46                                                      | <i>Mrpl46</i>                                           | -1,4760085 | 0,00036166 |
| Lectin, galactoside-binding, soluble, 3 binding protein                                  | <i>Lgals3bp</i>                                         | -1,4757653 | 0,00866235 |
| Inositol monophosphatase domain containing 1                                             | <i>Impad1</i>                                           | -1,4754148 | 0,0003177  |
| CGG triplet repeat binding protein 1                                                     | <i>Cggbp1</i>                                           | -1,4753767 | 0,00012009 |
| Solute carrier family 38, member 2                                                       | <i>Slc38a2</i>                                          | -1,4748157 | 0,00013223 |
| Low density lipoprotein receptor-related protein associated protein 1                    | <i>Lrpap1</i>                                           | -1,4747809 | 0,00020473 |
| CCR4-NOT transcription complex, subunit 6-like                                           | <i>Cnot6l</i>                                           | -1,4745292 | 0,0010713  |
| Casitas B-lineage lymphoma-like 1                                                        | <i>Cbl1</i>                                             | -1,4744621 | 0,0062996  |
| Alcohol dehydrogenase 5 (class III), chi polypeptide                                     | <i>Adh5</i>                                             | -1,4742087 | 0,00032245 |
| Multivesicular body subunit 12A                                                          | <i>Mvb12a</i>                                           | -1,4739939 | 0,00303494 |
| Protein disulfide isomerase associated 4                                                 | <i>Pdia4</i>                                            | -1,4737863 | 0,00078354 |
| Mago-nashi homolog, proliferation-associated (Drosophila)                                | <i>Magoh</i>                                            | -1,472782  | 0,00010682 |
| Protein tyrosine phosphatase, non-receptor type 14                                       | <i>Ptpn14</i>                                           | -1,4722898 | 0,0015415  |
| DNA segment, Chr 8, ERATO Doi 738, expressed                                             | <i>D8Ertd738e</i>                                       | -1,4722684 | 0,00048972 |
| Golgi coiled coil 1                                                                      | <i>Gcc1</i>                                             | -1,4717202 | 0,00358    |
| Translocase of inner mitochondrial membrane 8A1                                          | <i>Timm8a1</i>                                          | -1,47113   | 0,00036145 |
| Fibulin 2                                                                                | <i>Fbln2</i>                                            | -1,4707538 | 0,00015574 |
| Retinol dehydrogenase 13 (all-trans and 9-cis)                                           | <i>Rdh13</i>                                            | -1,4693994 | 0,00043317 |
| Vacuolar protein sorting 37C (yeast)                                                     | <i>Vps37c</i>                                           | -1,4691235 | 0,00072116 |
| RIKEN cdna 1200003I10 gene /// RIKEN cdna 1200015M12 gene /// RIKEN cdna A130040M12 gene | 1200003I10Rik ///<br>1200015M12Rik ///<br>A130040M12Rik | -1,4690754 | 9,42E-05   |
| T cell, immune regulator 1, atpase, H <sup>+</sup> transporting, lysosomal V0 protein A3 | <i>Tcirg1</i>                                           | -1,4683915 | 0,00094292 |
| Keratinocyte associated protein 2                                                        | <i>Krtcap2</i>                                          | -1,4683182 | 0,00053358 |
| Ribosomal protein S5                                                                     | <i>Rps5</i>                                             | -1,4680526 | 8,12E-05   |
| Oxidase assembly 1-like                                                                  | <i>Oxa1l</i>                                            | -1,467952  | 0,00041824 |
| Mannosyl-oligosaccharide glucosidase                                                     | <i>Mogs</i>                                             | -1,4665038 | 0,00041027 |
| Zinc finger with KRAB and SCAN domains 6                                                 | <i>Zkscan6</i>                                          | -1,4663205 | 0,00108537 |
| PRP31 pre-mrna processing factor 31 homolog (yeast)                                      | <i>Prpf31</i>                                           | -1,4658403 | 0,0012266  |
| Family with sequence similarity 111, member A                                            | <i>Fam111a</i>                                          | -1,4651558 | 0,00012987 |
| EH domain binding protein 1-like 1                                                       | <i>Ehbp1l1</i>                                          | -1,4648802 | 0,00157944 |
| U1 small nuclear ribonucleoprotein C                                                     | <i>Snrpc</i>                                            | -1,4648181 | 0,00051668 |
| WD repeat domain, phosphoinositide interacting 2                                         | <i>Wipi2</i>                                            | -1,4647933 | 0,00029662 |
| Mannoside acetylglucosaminyltransferase 1                                                | <i>Mgat1</i>                                            | -1,4646796 | 0,00057832 |
| Branched chain aminotransferase 2, mitochondrial                                         | <i>Bcat2</i>                                            | -1,4645563 | 0,00162541 |
| Fyn proto-oncogene                                                                       | <i>Fyn</i>                                              | -1,4635119 | 0,00218315 |
| Nuclear receptor subfamily 4, group A, member 1                                          | <i>Nr4a1</i>                                            | -1,4634666 | 0,00723007 |
| Glycoprotein m6b                                                                         | <i>Gpm6b</i>                                            | -1,4630029 | 0,00122836 |



|                                                                                                                                                                                                                     |                                                                                                                                                           |            |            |
|---------------------------------------------------------------------------------------------------------------------------------------------------------------------------------------------------------------------|-----------------------------------------------------------------------------------------------------------------------------------------------------------|------------|------------|
| ATP-binding cassette, sub-family F (GCN20), member 1                                                                                                                                                                | <i>Abcf1</i>                                                                                                                                              | -1,4628087 | 0,00310114 |
| Myomesin 1                                                                                                                                                                                                          | <i>Myom1</i>                                                                                                                                              | -1,4627323 | 0,00122391 |
| Oxidoreductase like domain containing 1                                                                                                                                                                             | <i>Oxld1</i>                                                                                                                                              | -1,4626343 | 0,00424994 |
| Intersectin 1 (SH3 domain protein 1A)                                                                                                                                                                               | <i>Itsn1</i>                                                                                                                                              | -1,4620968 | 0,00418135 |
| Solute carrier family 25 (mitochondrial carrier, adenine nucleotide translocator), member 4                                                                                                                         | <i>Slc25a4</i>                                                                                                                                            | -1,4618501 | 0,00014956 |
| Rearranged L-myc fusion sequence                                                                                                                                                                                    | <i>Rlf</i>                                                                                                                                                | -1,4617369 | 0,00051741 |
| Eva-1 homolog A (C. Elegans)                                                                                                                                                                                        | <i>Eva1a</i>                                                                                                                                              | -1,4615198 | 0,00274572 |
| MIS18 kinetochore protein homolog A (S. Pombe)                                                                                                                                                                      | <i>Mis18a</i>                                                                                                                                             | -1,4606966 | 0,00214147 |
| Multiple endocrine neoplasia 1                                                                                                                                                                                      | <i>Men1</i>                                                                                                                                               | -1,4601297 | 0,00135889 |
| Hephaestin                                                                                                                                                                                                          | <i>Heph</i>                                                                                                                                               | -1,4597022 | 0,00651391 |
| Predicted pseudogene 10913 /// predicted gene 12447<br>/// predicted gene 12508 /// predicted pseudogene 8210<br>/// 60S ribosomal protein L29-like /// 60S ribosomal<br>protein L29-like /// ribosomal protein L29 | <i>Gm10913</i> ///<br><i>Gm12447</i> ///<br><i>Gm12508</i> ///<br><i>Gm8210</i> ///<br><i>LOC100503055</i> ///<br><i>LOC102642233</i> ///<br><i>Rpl29</i> | -1,4590454 | 0,00018891 |
| RIKEN cdna 1700030K09 gene                                                                                                                                                                                          | <i>1700030K09Rik</i>                                                                                                                                      | -1,4583058 | 0,00015566 |
| Trans-acting transcription factor 1                                                                                                                                                                                 | <i>Sp1</i>                                                                                                                                                | -1,4578601 | 0,00209576 |
| ELK4, member of ETS oncogene family                                                                                                                                                                                 | <i>Elk4</i>                                                                                                                                               | -1,4577277 | 0,00037434 |
| Cell division cycle associated 5                                                                                                                                                                                    | <i>Cdca5</i>                                                                                                                                              | -1,4569556 | 0,00065083 |
| Tripartite motif-containing 44                                                                                                                                                                                      | <i>Trim44</i>                                                                                                                                             | -1,4568267 | 0,00015908 |
| Interleukin 6 signal transducer                                                                                                                                                                                     | <i>Il6st</i>                                                                                                                                              | -1,4564983 | 0,00025836 |
| UBX domain protein 1                                                                                                                                                                                                | <i>Ubxn1</i>                                                                                                                                              | -1,4562245 | 0,00026511 |
| ADP-dependent glucokinase                                                                                                                                                                                           | <i>Adpgk</i>                                                                                                                                              | -1,4556923 | 0,00091433 |
| UFM1-specific peptidase 2                                                                                                                                                                                           | <i>Ufsp2</i>                                                                                                                                              | -1,4555025 | 0,00017917 |
| Tumor suppressing subtransferable candidate 1                                                                                                                                                                       | <i>Tssc1</i>                                                                                                                                              | -1,4554173 | 0,00020433 |
| Vacuolar protein sorting 35                                                                                                                                                                                         | <i>Vps35</i>                                                                                                                                              | -1,4551128 | 0,00580272 |
| ATP-binding cassette, sub-family B (MDR/TAP), member 9                                                                                                                                                              | <i>Abcb9</i>                                                                                                                                              | -1,4550357 | 0,00108225 |
| Zinc finger protein 451                                                                                                                                                                                             | <i>Zfp451</i>                                                                                                                                             | -1,4549187 | 0,00141971 |
| Forkhead box C1                                                                                                                                                                                                     | <i>Foxc1</i>                                                                                                                                              | -1,4548893 | 0,0010052  |
| Integrin beta 7                                                                                                                                                                                                     | <i>Itgb7</i>                                                                                                                                              | -1,4548003 | 0,00050617 |
| Enhancer of yellow 2 homolog (Drosophila)                                                                                                                                                                           | <i>Eny2</i>                                                                                                                                               | -1,4547685 | 0,00058983 |
| Protein phosphatase 6, regulatory subunit 3                                                                                                                                                                         | <i>Ppp6r3</i>                                                                                                                                             | -1,454654  | 0,00156755 |
| CUGBP, Elav-like family member 1                                                                                                                                                                                    | <i>Celf1</i>                                                                                                                                              | -1,4537795 | 0,00011036 |
| Glutamate oxaloacetate transaminase 2, mitochondrial                                                                                                                                                                | <i>Got2</i>                                                                                                                                               | -1,4529374 | 0,00028055 |
| Neuroblastoma ras oncogene                                                                                                                                                                                          | <i>Nras</i>                                                                                                                                               | -1,4526412 | 0,00083244 |
| Zinc finger protein 213                                                                                                                                                                                             | <i>Zfp213</i>                                                                                                                                             | -1,4516538 | 0,00047504 |
| NOP10 ribonucleoprotein                                                                                                                                                                                             | <i>Nop10</i>                                                                                                                                              | -1,4516468 | 0,00060192 |
| CCAAT/enhancer binding protein zeta                                                                                                                                                                                 | <i>Cebpz</i>                                                                                                                                              | -1,4512627 | 0,0005907  |
| Pseudouridylyl synthase 7 homolog (S. Cerevisiae)                                                                                                                                                                   | <i>Pus7</i>                                                                                                                                               | -1,4510244 | 0,00057396 |
| Phosphodiesterase 12                                                                                                                                                                                                | <i>Pde12</i>                                                                                                                                              | -1,4501755 | 0,00362628 |
| B cell translocation gene 2, anti-proliferative                                                                                                                                                                     | <i>Btg2</i>                                                                                                                                               | -1,4492717 | 0,00423181 |
| Zinc finger protein 160                                                                                                                                                                                             | <i>Zfp160</i>                                                                                                                                             | -1,4488918 | 0,00040222 |

|                                                                                                                               |                                                                                                               |            |            |
|-------------------------------------------------------------------------------------------------------------------------------|---------------------------------------------------------------------------------------------------------------|------------|------------|
| Carbohydrate kinase domain containing                                                                                         | <i>Carkd</i>                                                                                                  | -1,4486921 | 0,00061355 |
| Interactor of little elongation complex ELL subunit 2                                                                         | <i>Ice2</i>                                                                                                   | -1,4482409 | 0,00238026 |
| Ethylmalonic encephalopathy 1                                                                                                 | <i>Ethe1</i>                                                                                                  | -1,4479951 | 0,00054654 |
| Origin recognition complex, subunit 6                                                                                         | <i>Orc6</i>                                                                                                   | -1,4479601 | 0,00022002 |
| Kelch-like 42                                                                                                                 | <i>Klhl42</i>                                                                                                 | -1,4478309 | 0,0017153  |
| Adaptor protein complex AP-1, gamma 1 subunit                                                                                 | <i>Ap1g1</i>                                                                                                  | -1,447534  | 0,00157987 |
| UDP-Gal:betaglcnac beta 1,3-galactosyltransferase, polypeptide 4                                                              | <i>B3galt4</i>                                                                                                | -1,4470906 | 0,00369078 |
| PR domain containing 5                                                                                                        | <i>Prdm5</i>                                                                                                  | -1,4465167 | 0,00111717 |
| Kelch domain containing 4                                                                                                     | <i>Klhdc4</i>                                                                                                 | -1,4465047 | 0,00079785 |
| Zinc finger protein 260                                                                                                       | <i>Zfp260</i>                                                                                                 | -1,4463507 | 0,00019854 |
| Degenerative spermatocyte homolog 1 (Drosophila)                                                                              | <i>Degs1</i>                                                                                                  | -1,4463218 | 0,00040147 |
| Predicted pseudogene 10913 /// predicted gene 12508                                                                           | <i>Gm10913 ///</i>                                                                                            | -1,4462965 | 0,00023024 |
| /// predicted pseudogene 8210 /// 60S ribosomal protein L29-like /// 60S ribosomal protein L29-like /// ribosomal protein L29 | <i>Gm12508 ///</i><br><i>Gm8210 ///</i><br><i>LOC100503055 ///</i><br><i>LOC102642233 ///</i><br><i>Rpl29</i> |            |            |
| Receptor (TNFRSF)-interacting serine-threonine kinase 1                                                                       | <i>Ripk1</i>                                                                                                  | -1,4462658 | 0,00845245 |
| Signal transducer and activator of transcription 3                                                                            | <i>Stat3</i>                                                                                                  | -1,4455503 | 0,0003188  |
| Solute carrier family 6 (neurotransmitter transporter, taurine), member 6                                                     | <i>Slc6a6</i>                                                                                                 | -1,4454558 | 0,00339103 |
| Forkhead box O3                                                                                                               | <i>Foxo3</i>                                                                                                  | -1,4445675 | 0,00035375 |
| RNA binding motif protein 15B                                                                                                 | <i>Rbm15b</i>                                                                                                 | -1,4445567 | 0,00195726 |
| Ribosomal protein L13A                                                                                                        | <i>Rpl13a</i>                                                                                                 | -1,4442226 | 0,00021095 |
| Pellino 1                                                                                                                     | <i>Peli1</i>                                                                                                  | -1,4441638 | 0,00736814 |
| V-crk sarcoma virus CT10 oncogene homolog (avian)                                                                             | <i>Crk</i>                                                                                                    | -1,4439834 | 0,00076759 |
| Jagunal homolog 1 (Drosophila)                                                                                                | <i>Jagn1</i>                                                                                                  | -1,4439309 | 0,00065174 |
| Pro-platelet basic protein                                                                                                    | <i>Ppbp</i>                                                                                                   | -1,4435505 | 0,00153407 |
| Transmembrane emp24-like trafficking protein 10 (yeast)                                                                       | <i>Tmed10</i>                                                                                                 | -1,4434627 | 0,00013239 |
| Caspase 2                                                                                                                     | <i>Casp2</i>                                                                                                  | -1,4433248 | 0,0006098  |
| WD repeat domain 46                                                                                                           | <i>Wdr46</i>                                                                                                  | -1,442211  | 0,0050227  |
| Baculoviral IAP repeat-containing 2                                                                                           | <i>Birc2</i>                                                                                                  | -1,4415792 | 0,00049982 |
| Meis homeobox 2                                                                                                               | <i>Meis2</i>                                                                                                  | -1,441066  | 0,00100935 |
| Heat shock protein 2                                                                                                          | <i>Hspb2</i>                                                                                                  | -1,4409612 | 0,00377633 |
| WNT1 inducible signaling pathway protein 1                                                                                    | <i>Wisp1</i>                                                                                                  | -1,4409044 | 0,00021922 |
| ADP-ribosylation factor 6                                                                                                     | <i>Arf6</i>                                                                                                   | -1,4404298 | 0,00260014 |
| RIO kinase 1 (yeast)                                                                                                          | <i>Riok1</i>                                                                                                  | -1,4401898 | 0,00171381 |
| Max binding protein                                                                                                           | <i>Mnt</i>                                                                                                    | -1,4401309 | 0,00192324 |
| Predicted gene 5617                                                                                                           | <i>Gm5617</i>                                                                                                 | -1,4399752 | 0,00136977 |
| Rho gtpase activating protein 35                                                                                              | <i>Arhgap35</i>                                                                                               | -1,4396985 | 0,00284092 |
| Ring finger protein 166                                                                                                       | <i>Rnf166</i>                                                                                                 | -1,4395557 | 0,00035235 |
| BCL2-like 2                                                                                                                   | <i>Bcl2l2</i>                                                                                                 | -1,4391899 | 0,00248474 |
| Ribosomal protein S6 kinase, polypeptide 2                                                                                    | <i>Rps6ka2</i>                                                                                                | -1,439138  | 0,00069205 |
| Protein O-glucosyltransferase 1                                                                                               | <i>Poglut1</i>                                                                                                | -1,4377974 | 0,00037774 |

|                                                                                         |                          |            |            |
|-----------------------------------------------------------------------------------------|--------------------------|------------|------------|
| Tubulin cofactor A                                                                      | <i>Tbca</i>              | -1,4374214 | 0,00031673 |
| Glutamate receptor, ionotropic, kainate 5 (gamma 2)                                     | <i>Grik5</i>             | -1,437412  | 0,00726158 |
| RIKEN cdna 1700123O20 gene                                                              | <i>1700123O20Rik</i>     | -1,4368696 | 0,00120099 |
| UDP-N-acetylglucosamine pyrophosphorylase 1-like 1                                      | <i>Uap1l1</i>            | -1,4366978 | 0,00032555 |
| Methionine adenosyltransferase II, alpha                                                | <i>Mat2a</i>             | -1,4364619 | 0,00381906 |
| Lysosomal-associated membrane protein 1                                                 | <i>Lamp1</i>             | -1,4362542 | 0,00012987 |
| Zinc finger protein 1                                                                   | <i>Zfp1</i>              | -1,4360126 | 0,00461472 |
| RNA binding motif protein 6                                                             | <i>Rbm6</i>              | -1,435105  | 0,00449671 |
| Serine/arginine-rich splicing factor 7                                                  | <i>Srsf7</i>             | -1,4348434 | 0,00187036 |
| UDP-Gal:betaglcnaac beta 1,4-galactosyltransferase, polypeptide 6                       | <i>B4galt6</i>           | -1,4344453 | 0,00574636 |
| Cyclin B1 /// predicted gene 5593                                                       | <i>Ccnb1 /// Gm5593</i>  | -1,4335593 | 0,00254443 |
| Adaptor protein, phosphotyrosine interaction, PH domain and leucine zipper containing 1 | <i>Appl1</i>             | -1,4335062 | 0,00768923 |
| OTU domain containing 6B                                                                | <i>Otud6b</i>            | -1,4334249 | 0,00276753 |
| Serine/threonine kinase 38                                                              | <i>Stk38</i>             | -1,4333589 | 0,0003551  |
| Lysine (K)-specific demethylase 1A                                                      | <i>Kdm1a</i>             | -1,4333207 | 0,00024053 |
| SET domain containing 4                                                                 | <i>Setd4</i>             | -1,4332346 | 0,0007407  |
| Myeloblastosis oncogene-like 2                                                          | <i>Mybl2</i>             | -1,4332284 | 0,00018645 |
| A disintegrin and metallopeptidase domain 17                                            | <i>Adam17</i>            | -1,4326966 | 0,00097909 |
| Acetyl-Coenzyme A acyltransferase 1A /// acetyl-Coenzyme A acyltransferase 1B           | <i>Acaa1a /// Acaa1b</i> | -1,4325931 | 0,00333898 |
| Phospholipase D2                                                                        | <i>Pld2</i>              | -1,43203   | 0,00137624 |
| Nuclear casein kinase and cyclin-dependent kinase substrate 1                           | <i>Nucks1</i>            | -1,4318605 | 0,00080352 |
| Small nuclear RNA activating complex, polypeptide 2                                     | <i>Snape2</i>            | -1,4318281 | 0,00249839 |
| LEM domain containing 2                                                                 | <i>Lemd2</i>             | -1,4316356 | 0,0015415  |
| RAB5A, member RAS oncogene family                                                       | <i>Rab5a</i>             | -1,431619  | 0,00609317 |
| Syncoilin                                                                               | <i>Sync</i>              | -1,4310379 | 0,00132066 |
| Gem (nuclear organelle) associated protein 6 /// predicted pseudogene 6253              | <i>Gemin6 /// Gm6253</i> | -1,4309571 | 0,00044631 |
| Torsin family 2, member A                                                               | <i>Tor2a</i>             | -1,4305876 | 0,00065211 |
| Transmembrane protein 183A                                                              | <i>Tmem183a</i>          | -1,4302316 | 0,00094257 |
| Neuroplastin                                                                            | <i>Nptn</i>              | -1,4302115 | 0,00524193 |
| Mitogen-activated protein kinase kinase 7                                               | <i>Map2k7</i>            | -1,4300164 | 0,00994279 |
| BUD31 homolog (yeast)                                                                   | <i>Bud31</i>             | -1,4298757 | 0,00402002 |
| Obg-like atpase 1                                                                       | <i>Ola1</i>              | -1,4292277 | 0,00073934 |
| Cell cycle associated protein 1                                                         | <i>Caprin1</i>           | -1,4287046 | 0,00680542 |
| PRP19/PSO4 pre-mrna processing factor 19 homolog (S. Cerevisiae)                        | <i>Prpf19</i>            | -1,4285331 | 0,00021905 |
| Beta-1,3-glucuronyltransferase 3 (glucuronosyltransferase I)                            | <i>B3gat3</i>            | -1,4282185 | 0,00028604 |
| Branched chain ketoacid dehydrogenase E1, alpha polypeptide                             | <i>Bckdha</i>            | -1,4271772 | 0,00340039 |
| RIKEN cdna C330006A16 gene                                                              | <i>C330006A16Rik</i>     | -1,4270175 | 0,00211695 |
| Solute carrier family 35, member F5                                                     | <i>Slc35f5</i>           | -1,426569  | 0,00054372 |
| Succinate dehydrogenase complex assembly factor 2                                       | <i>Sdhaf2</i>            | -1,426497  | 0,00101837 |
| Pericentriolar material 1                                                               | <i>Pcm1</i>              | -1,4262373 | 0,00754337 |

|                                                                                                     |                                                 |            |            |
|-----------------------------------------------------------------------------------------------------|-------------------------------------------------|------------|------------|
| RIKEN cdna E130309D02 gene                                                                          | <i>E130309D02Rik</i>                            | -1,4260741 | 0,00055672 |
| Pentatricopeptide repeat domain 3                                                                   | <i>Ptcd3</i>                                    | -1,425855  | 0,00036121 |
| Camp-regulated phosphoprotein 19                                                                    | <i>Arpp19</i>                                   | -1,4256068 | 0,00087698 |
| Dolichyl-di-phosphooligosaccharide-protein glycotransferase                                         | <i>Ddost</i>                                    | -1,4255638 | 0,00016267 |
| Phospholipid scramblase 3                                                                           | <i>Plscr3</i>                                   | -1,4252835 | 0,00050638 |
| Mitochondrial ubiquitin ligase activator of NFKB 1                                                  | <i>Mul1</i>                                     | -1,4250715 | 0,00324234 |
| Malignant fibrous histiocytoma amplified sequence 1                                                 | <i>Mfhas1</i>                                   | -1,4248158 | 0,00065173 |
| Splicing factor 1                                                                                   | <i>Sf1</i>                                      | -1,4246165 | 0,00054405 |
| V-Ki-ras2 Kirsten rat sarcoma viral oncogene homolog                                                | <i>Kras</i>                                     | -1,4244298 | 0,0009151  |
| Cyclin D binding myb-like transcription factor 1                                                    | <i>Dmtf1</i>                                    | -1,4240882 | 0,0003188  |
| Arfgap with gtpase domain, ankyrin repeat and PH domain 1                                           | <i>Agap1</i>                                    | -1,4240124 | 0,00325024 |
| Pumilio RNA-binding family member 1                                                                 | <i>Pum1</i>                                     | -1,4238256 | 0,00107713 |
| Zinc finger, BED domain containing 3                                                                | <i>Zbed3</i>                                    | -1,4237683 | 0,00336956 |
| UHRF1 (ICBP90) binding protein 1-like                                                               | <i>Uhrf1bp1l</i>                                | -1,4237511 | 0,00123143 |
| Ubiquitin carboxyl-terminal esterase L5                                                             | <i>Uchl5</i>                                    | -1,4236815 | 0,00755827 |
| Ribonuclease P 14 subunit                                                                           | <i>Rpp14</i>                                    | -1,4236177 | 0,00112888 |
| ATPase inhibitory factor 1                                                                          | <i>Atpif1</i>                                   | -1,423328  | 0,00072311 |
| Mitochondrial ribosomal protein L1                                                                  | <i>Mrpl1</i>                                    | -1,4233222 | 0,00684219 |
| Phospholipase A2, activating protein                                                                | <i>Plaa</i>                                     | -1,4233031 | 0,00142695 |
| Synaptophysin-like protein                                                                          | <i>Sypl</i>                                     | -1,4231562 | 0,00057475 |
| Syndecan binding protein                                                                            | <i>Sdcbp</i>                                    | -1,4228437 | 0,00275137 |
| Kelch-like 2, Mayven                                                                                | <i>Klhl2</i>                                    | -1,4228124 | 0,00123371 |
| Neogenin                                                                                            | <i>Neo1</i>                                     | -1,4220981 | 0,00100427 |
| Predicted gene 13889                                                                                | <i>Gm13889</i>                                  | -1,4217186 | 0,00079122 |
| Poly (ADP-ribose) polymerase family, member 8                                                       | <i>Parp8</i>                                    | -1,4213311 | 0,00122386 |
| DEAD (Asp-Glu-Ala-Asp) box polypeptide 46                                                           | <i>Ddx46</i>                                    | -1,4203937 | 0,00616303 |
| PHD finger protein 5A                                                                               | <i>Phf5a</i>                                    | -1,4200122 | 0,00087363 |
| DET1 and DDB1 associated 1                                                                          | <i>Dda1</i>                                     | -1,4199495 | 0,00186058 |
| Male-specific lethal 3-like 2 (Drosophila)                                                          | <i>Msl3l2</i>                                   | -1,4197621 | 0,00133519 |
| Apelin                                                                                              | <i>Apln</i>                                     | -1,419522  | 0,00560969 |
| Vascular endothelial growth factor A                                                                | <i>Vegfa</i>                                    | -1,4194377 | 0,00721515 |
| RNA binding motif protein 15                                                                        | <i>Rbm15</i>                                    | -1,4193708 | 0,00904805 |
| Recombination signal binding protein for immunoglobulin kappa J region                              | <i>Rbpj</i>                                     | -1,4192554 | 0,00242578 |
| 40S ribosomal protein S16-like /// ribosomal protein S16<br>/// ribosomal protein S16, pseudogene 2 | <i>LOC100862433 ///<br/>Rps16 /// Rps16-ps2</i> | -1,4192283 | 0,00013801 |
| Heat shock protein 12B                                                                              | <i>Hspa12b</i>                                  | -1,419097  | 0,00089331 |
| TNF receptor-associated factor 3                                                                    | <i>Traf3</i>                                    | -1,4186725 | 0,00166522 |
| Mitochondrial ribosomal protein L36                                                                 | <i>Mrpl36</i>                                   | -1,4182388 | 0,00039639 |
| Tripartite motif-containing 28                                                                      | <i>Trim28</i>                                   | -1,4180726 | 0,00211005 |
| Tripartite motif-containing 59                                                                      | <i>Trim59</i>                                   | -1,4175483 | 0,00942401 |
| KAT8 regulatory NSL complex subunit 1-like                                                          | <i>Kansl1l</i>                                  | -1,4172302 | 0,00435077 |
| Calcium channel, voltage-dependent, P/Q type, alpha 1A subunit                                      | <i>Cacna1a</i>                                  | -1,4172149 | 0,00386754 |
| Zinc finger and BTB domain containing 2                                                             | <i>Zbtb2</i>                                    | -1,4171484 | 0,00054419 |

|                                                                             |                                     |            |            |
|-----------------------------------------------------------------------------|-------------------------------------|------------|------------|
| RAB8A, member RAS oncogene family                                           | <i>Rab8a</i>                        | -1,4169514 | 0,00061966 |
| Family with sequence similarity 173, member A                               | <i>Fam173a</i>                      | -1,4168384 | 0,00046871 |
| N-myc (and STAT) interactor                                                 | <i>Nmi</i>                          | -1,4160876 | 0,00080201 |
| Growth arrest specific 5 /// small nucleolar RNA, C/D box 47                | <i>Gas5 /// Snord47</i>             | -1,4141607 | 0,00456467 |
| Par-6 family cell polarity regulator alpha                                  | <i>Pard6a</i>                       | -1,4131836 | 0,000649   |
| 5-hydroxytryptamine (serotonin) receptor 6                                  | <i>Htr6</i>                         | -1,4131538 | 0,00611941 |
| Uridine monophosphate synthetase                                            | <i>Umps</i>                         | -1,4127096 | 0,00054464 |
| Nuclear factor of kappa light polypeptide gene enhancer in B cells 1, p105  | <i>Nfkb1</i>                        | -1,4125569 | 0,00127271 |
| Ras responsive element binding protein 1                                    | <i>Rreb1</i>                        | -1,4119987 | 0,00043162 |
| LIM domain binding 1                                                        | <i>Ldb1</i>                         | -1,411806  | 0,00083081 |
| Ubiquitin specific peptidase 3                                              | <i>Usp3</i>                         | -1,4117937 | 0,00127271 |
| General transcription factor IIIC, polypeptide 4                            | <i>Gtf3c4</i>                       | -1,4116556 | 0,00077018 |
| Protein-tyrosine sulfotransferase 2                                         | <i>Tpst2</i>                        | -1,4115731 | 0,00017721 |
| RIKEN cdna 2010107E04 gene                                                  | <i>2010107E04Rik</i>                | -1,4113499 | 0,00052169 |
| Solute carrier family 25, member 47                                         | <i>Slc25a47</i>                     | -1,411116  | 0,00643059 |
| Peroxisomal membrane protein 4                                              | <i>Pxmp4</i>                        | -1,4107988 | 0,00684219 |
| Htra serine peptidase 2                                                     | <i>Htra2</i>                        | -1,4105548 | 0,0061732  |
| DDHD domain containing 1                                                    | <i>Ddhd1</i>                        | -1,410524  | 0,00305065 |
| Ephrin A4                                                                   | <i>Efna4</i>                        | -1,4104733 | 0,00510244 |
| Dipeptidylpeptidase 7                                                       | <i>Dpp7</i>                         | -1,4102752 | 0,00298711 |
| SURP and G patch domain containing 1                                        | <i>Sugp1</i>                        | -1,4100868 | 0,00038947 |
| Asparagine synthetase                                                       | <i>Asns</i>                         | -1,4088828 | 0,00103915 |
| Splicing regulatory glutamine/lysine-rich protein 1interacting protein 1    | <i>Srek1ip1</i>                     | -1,4087553 | 0,00262943 |
| B cell translocation gene 1, anti-proliferative                             | <i>Btg1</i>                         | -1,4079916 | 0,00298065 |
| RIKEN cdna 9530068E07 gene                                                  | <i>9530068E07Rik</i>                | -1,4075172 | 0,00411504 |
| Heterogeneous nuclear ribonucleoprotein H3                                  | <i>Hnrnp3</i>                       | -1,4070118 | 0,0007097  |
| Dolichol kinase                                                             | <i>Dolk</i>                         | -1,4063815 | 0,00023024 |
| YTH domain family 3                                                         | <i>Ythdf3</i>                       | -1,406191  | 0,00459718 |
| GRAM domain containing 4                                                    | <i>Gramd4</i>                       | -1,4060669 | 0,00060775 |
| MLX interacting protein                                                     | <i>Mlxip</i>                        | -1,4057131 | 0,00483942 |
| RIKEN cdna 4833420G17 gene                                                  | <i>4833420G17Rik</i>                | -1,4054944 | 0,00374577 |
| Serine/arginine-rich splicing factor 6                                      | <i>Srsf6</i>                        | -1,405379  | 0,00072702 |
| DNA methyltransferase 3B                                                    | <i>Dnmt3b</i>                       | -1,4045716 | 0,00161215 |
| Microsomal glutathione S-transferase 1                                      | <i>Mgst1</i>                        | -1,4041339 | 0,0003934  |
| Translocase of inner mitochondrial membrane 8B                              | <i>Timm8b</i>                       | -1,4040517 | 0,00124566 |
| RAB34, member RAS oncogene family                                           | <i>Rab34</i>                        | -1,4039587 | 0,00114963 |
| Zinc finger protein 955A                                                    | <i>Zfp955a</i>                      | -1,4037734 | 0,00292083 |
| Neural proliferation, differentiation and control 1                         | <i>Npdc1</i>                        | -1,4035445 | 0,00233752 |
| N(alpha)-acetyltransferase 15, nata auxiliary subunit                       | <i>Naa15</i>                        | -1,4025608 | 0,00110086 |
| Protein arginine N-methyltransferase 1                                      | <i>Prmt1</i>                        | -1,4024721 | 0,00049681 |
| Proline synthetase co-transcribed                                           | <i>Prosc</i>                        | -1,4023317 | 0,00459631 |
| Predicted gene, 21596 /// predicted gene 6115 /// high mobility group box 1 | <i>Gm21596 /// Gm6115 /// Hmgbl</i> | -1,4022854 | 0,00079192 |

|                                                                                               |                                           |            |            |
|-----------------------------------------------------------------------------------------------|-------------------------------------------|------------|------------|
| Proteasome (prosome, macropain) assembly chaperone 1                                          | <i>Psmg1</i>                              | -1,4022792 | 0,00038634 |
| Polymerase (RNA) I polypeptide C                                                              | <i>Polr1c</i>                             | -1,4020927 | 0,00066855 |
| Ligand dependent nuclear receptor corepressor                                                 | <i>Lcor</i>                               | -1,4017703 | 0,00574953 |
| EMG1 nucleolar protein homolog (S. Cerevisiae)                                                | <i>Emg1</i>                               | -1,4015159 | 0,00082989 |
| Reticulocalbin 3, EF-hand calcium binding domain                                              | <i>Rcn3</i>                               | -1,4008248 | 0,00068291 |
| Cyclin C                                                                                      | <i>Ccnc</i>                               | -1,4000852 | 0,00788659 |
| Transmembrane protein 126A                                                                    | <i>Tmem126a</i>                           | -1,399661  | 0,0015582  |
| Pleckstrin homology domain containing, family H (with myth4 domain) member 1                  | <i>Plekhh1</i>                            | -1,3990474 | 0,0082723  |
| Zinc finger protein 280D                                                                      | <i>Zfp280d</i>                            | -1,3988992 | 0,0014949  |
| Nodal modulator 1                                                                             | <i>Nomo1</i>                              | -1,3986057 | 0,00096682 |
| 40S ribosomal protein S6-like /// ribosomal protein S6 /// ribosomal protein S6, pseudogene 4 | <i>LOC102643254 /// Rps6 /// Rps6-ps4</i> | -1,3979588 | 0,00637796 |
| Nuclear RNA export factor 1                                                                   | <i>Nxf1</i>                               | -1,3965658 | 0,00144943 |
| Cytokine induced apoptosis inhibitor 1                                                        | <i>Ciapi1</i>                             | -1,3953741 | 0,00066206 |
| Ribosomal protein S19                                                                         | <i>Rps19</i>                              | -1,3949942 | 0,00045183 |
| Exosome component 5                                                                           | <i>Exosc5</i>                             | -1,3945773 | 0,00182512 |
| Leucine carboxyl methyltransferase 2                                                          | <i>Lcmt2</i>                              | -1,3942534 | 0,00148731 |
| Cyclin-dependent kinase 9 (CDC2-related kinase)                                               | <i>Cdk9</i>                               | -1,3942022 | 0,00053873 |
| Ubiquilin 4                                                                                   | <i>Ubqln4</i>                             | -1,3927469 | 0,00270733 |
| Nudix (nucleoside diphosphate linked moiety X)-type motif 19                                  | <i>Nudt19</i>                             | -1,3926801 | 0,00047688 |
| Obscurin-like 1                                                                               | <i>Obsl1</i>                              | -1,3926573 | 0,00095698 |
| Aurora kinase A interacting protein 1                                                         | <i>Aurkaip1</i>                           | -1,3925584 | 0,00079985 |
| EPS8-like 2                                                                                   | <i>Eps8l2</i>                             | -1,3920184 | 0,00280647 |
| Transmembrane protein 40                                                                      | <i>Tmem40</i>                             | -1,3913881 | 0,0091889  |
| SEC62 homolog (S. Cerevisiae)                                                                 | <i>Sec62</i>                              | -1,3911061 | 0,00049431 |
| Von Willebrand factor A domain containing 9                                                   | <i>Vwa9</i>                               | -1,3908459 | 0,00031428 |
| DEAH (Asp-Glu-Ala-His) box polypeptide 30                                                     | <i>Dhx30</i>                              | -1,3904979 | 0,00248177 |
| Non-catalytic region of tyrosine kinase adaptor protein 2                                     | <i>Nck2</i>                               | -1,3902193 | 0,00127918 |
| Predicted gene 7285 /// ribosomal protein S7                                                  | <i>Gm7285 /// Rps7</i>                    | -1,3893568 | 0,00210565 |
| Smg-8 homolog, nonsense mediated mrna decay factor (C. Elegans)                               | <i>Smg8</i>                               | -1,3892643 | 0,00399224 |
| Protein kinase C, beta                                                                        | <i>Prkcb</i>                              | -1,3891937 | 0,00099484 |
| Prefoldin 2                                                                                   | <i>Pfdn2</i>                              | -1,3890149 | 0,00226054 |
| Protein phosphatase 1, regulatory (inhibitor) subunit 15A                                     | <i>Ppp1r15a</i>                           | -1,3887416 | 0,00274762 |
| Prolactin family 7, subfamily a, member 2                                                     | <i>Prl7a2</i>                             | -1,3886413 | 0,00218315 |
| Kelch-like 9                                                                                  | <i>Klhl9</i>                              | -1,3884216 | 0,0032382  |
| FAST kinase domains 2                                                                         | <i>Fastkd2</i>                            | -1,3882827 | 0,00123419 |
| Ribonuclease H1                                                                               | <i>Rnaseh1</i>                            | -1,3882595 | 0,00187045 |
| PHD finger protein 23                                                                         | <i>Phf23</i>                              | -1,3879364 | 0,00086316 |
| Zinc finger, ZZ domain containing 3                                                           | <i>Zzz3</i>                               | -1,3878622 | 0,00624921 |
| Thyroid hormone receptor interactor 11                                                        | <i>Trip11</i>                             | -1,3877726 | 0,00076173 |
| Protein phosphatase 2, regulatory subunit B', gamma                                           | <i>Ppp2r5c</i>                            | -1,3876736 | 0,00795429 |

|                                                                                                                |                         |            |            |
|----------------------------------------------------------------------------------------------------------------|-------------------------|------------|------------|
| Mitochondrial fission process 1                                                                                | <i>Mtfp1</i>            | -1,3873039 | 0,00073207 |
| PAK1 interacting protein 1                                                                                     | <i>Pak1ip1</i>          | -1,3872946 | 0,00058301 |
| Ribosomal protein S7                                                                                           | <i>Rps7</i>             | -1,3870419 | 0,00051056 |
| Glutamyl-trna synthetase 2 (mitochondrial)(putative)                                                           | <i>Ears2</i>            | -1,3870052 | 0,00831015 |
| Heme binding protein 2                                                                                         | <i>Hebp2</i>            | -1,3865564 | 0,00918587 |
| Methylmalonic aciduria (cobalamin deficiency) type A                                                           | <i>Mmaa</i>             | -1,3857624 | 0,00952001 |
| Transforming growth factor beta regulated gene 1                                                               | <i>Tbrg1</i>            | -1,3852016 | 0,0005721  |
| POZ (BTB) and AT hook containing zinc finger 1                                                                 | <i>Patz1</i>            | -1,3848074 | 0,00150371 |
| Cyclin H                                                                                                       | <i>Ccnh</i>             | -1,38473   | 0,00930323 |
| Acidic (leucine-rich) nuclear phosphoprotein 32 family, member A                                               | <i>Anp32a</i>           | -1,3845019 | 0,00193849 |
| Myo-inositol 1-phosphate synthase A1                                                                           | <i>Isyna1</i>           | -1,3843555 | 0,00057615 |
| NADH dehydrogenase (ubiquinone) 1 alpha subcomplex, assembly factor 1                                          | <i>Ndufaf1</i>          | -1,3838753 | 0,00077353 |
| Predicted pseudogene 10913 /// predicted gene 11449                                                            | <i>Gm10913 ///</i>      | -1,3836333 | 0,00025042 |
| /// predicted gene 12508 /// predicted gene 13213 ///                                                          | <i>Gm11449 ///</i>      |            |            |
| predicted pseudogene 8210 /// 60S ribosomal protein                                                            | <i>Gm12508 ///</i>      |            |            |
| L29-like /// 60S ribosomal protein L29-like /// ribosomal                                                      | <i>Gm13213 ///</i>      |            |            |
| protein L29                                                                                                    | <i>Gm8210 ///</i>       |            |            |
|                                                                                                                | <i>LOC100503055 ///</i> |            |            |
|                                                                                                                | <i>LOC102642233 ///</i> |            |            |
|                                                                                                                | <i>Rpl29</i>            |            |            |
| V-maf musculoaponeurotic fibrosarcoma oncogene family, protein G (avian)                                       | <i>Mafg</i>             | -1,3830084 | 0,00390737 |
| Missing oocyte, meiosis regulator, homolog (Drosophila)                                                        | <i>Mios</i>             | -1,3828066 | 0,00523618 |
| Mitochondrial ribosomal protein L15                                                                            | <i>Mrpl15</i>           | -1,3814584 | 0,00157771 |
| Translocase of inner mitochondrial membrane 10                                                                 | <i>Timm10</i>           | -1,3812301 | 0,00488818 |
| Zinc finger, MYND domain containing 19                                                                         | <i>Zmynd19</i>          | -1,3806345 | 0,00030994 |
| Lipin 2                                                                                                        | <i>Lpin2</i>            | -1,3805234 | 0,00725129 |
| Protein tyrosine phosphatase, non-receptor type 12                                                             | <i>Ptpn12</i>           | -1,3798454 | 0,00101363 |
| Solute carrier family 27 (fatty acid transporter), member 1                                                    | <i>Slc27a1</i>          | -1,3794797 | 0,00123419 |
| Glutamate-cysteine ligase, catalytic subunit                                                                   | <i>Gclc</i>             | -1,3793581 | 0,00362656 |
| Collagen, type VI, alpha 1                                                                                     | <i>Col6a1</i>           | -1,3792668 | 0,00828297 |
| Rap1 gtpase-activating protein                                                                                 | <i>Rap1gap</i>          | -1,3780535 | 0,00239958 |
| Family with sequence similarity 65, member A                                                                   | <i>Fam65a</i>           | -1,3777678 | 0,00506012 |
| Nuclear receptor co-repressor 1                                                                                | <i>Ncor1</i>            | -1,3777313 | 0,00173451 |
| Fibrillarin                                                                                                    | <i>Fbl</i>              | -1,3775561 | 0,0008092  |
| V-erb-b2 erythroblastic leukemia viral oncogene homolog 2, neuro/glioblastoma derived oncogene homolog (avian) | <i>ErbB2</i>            | -1,377198  | 0,00914449 |
| RRS1 ribosome biogenesis regulator homolog (S. Cerevisiae)                                                     | <i>Rrs1</i>             | -1,3771758 | 0,00193445 |
| Calmodulin-like 4                                                                                              | <i>Calml4</i>           | -1,3771142 | 0,00727112 |
| La ribonucleoprotein domain family, member 6                                                                   | <i>Larp6</i>            | -1,3771075 | 0,00844261 |
| Phospholipid scramblase 2                                                                                      | <i>Plscr2</i>           | -1,3770161 | 0,00181766 |
| Family with sequence similarity 3, member C                                                                    | <i>Fam3c</i>            | -1,3767622 | 0,00364103 |
| RWD domain containing 4A                                                                                       | <i>Rwdd4a</i>           | -1,3763772 | 0,00212573 |

|                                                         |                      |            |            |
|---------------------------------------------------------|----------------------|------------|------------|
| CDC16 cell division cycle 16                            | <i>Cdc16</i>         | -1,3762925 | 0,0023501  |
| G patch domain containing 4                             | <i>Gpatch4</i>       | -1,3759992 | 0,00275137 |
| Ataxia telangiectasia and Rad3 related                  | <i>Atr</i>           | -1,3746862 | 0,00109098 |
| Activin receptor IIA                                    | <i>Acvr2a</i>        | -1,3745861 | 0,00125411 |
| 5-hydroxymethylcytosine (hmc) binding, ES cell specific | <i>Hmces</i>         | -1,3744602 | 0,00046875 |
| Sorting nexin 9                                         | <i>Snx9</i>          | -1,3738016 | 0,00721217 |
| Spinster homolog 1                                      | <i>Spns1</i>         | -1,3737078 | 0,00588763 |
| COBW domain containing 1                                | <i>Cbwd1</i>         | -1,3732248 | 0,00102868 |
| WD repeat containing, antisense to Trp73                | <i>Wrap73</i>        | -1,3730975 | 0,00199976 |
| RIKEN cdna 5430417L22 gene                              | <i>5430417L22Rik</i> | -1,3730423 | 0,00172213 |
| Nucleoporin 133                                         | <i>Nup133</i>        | -1,3717135 | 0,00086316 |
| Eukaryotic translation initiation factor 3, subunit I   | <i>Eif3i</i>         | -1,3710274 | 0,00099252 |
| Mitogen-activated protein kinase kinase kinase 4        | <i>Map4k4</i>        | -1,3709504 | 0,00611496 |
| CWF19-like 1, cell cycle control (S. Pombe)             | <i>Cwf19l1</i>       | -1,370276  | 0,00636841 |
| Kinesin family member 1B                                | <i>Kif1b</i>         | -1,3695334 | 0,00635373 |
| DEAD (Asp-Glu-Ala-Asp) box polypeptide 39               | <i>Ddx39</i>         | -1,369067  | 0,0091889  |
| Reduced expression 2                                    | <i>Rex2</i>          | -1,3686344 | 0,00279972 |
| Xanthine dehydrogenase                                  | <i>Xdh</i>           | -1,3684082 | 0,00214969 |
| Eukaryotic translation initiation factor 3, subunit K   | <i>Eif3k</i>         | -1,3680018 | 0,00093145 |
| Leucine rich repeat containing 1                        | <i>Lrrc1</i>         | -1,3677854 | 0,00610652 |
| Adipocyte plasma membrane associated protein            | <i>Apmmap</i>        | -1,3676628 | 0,00362909 |
| Snail family zinc finger 2                              | <i>Snai2</i>         | -1,367357  | 0,00810768 |
| Ecotropic viral integration site 5                      | <i>Evi5</i>          | -1,3672181 | 0,00140985 |
| Nuclear factor, erythroid derived 2, like 3             | <i>Nfe2l3</i>        | -1,3671036 | 0,00431783 |
| Asteroid homolog 1 (Drosophila)                         | <i>Aste1</i>         | -1,3668807 | 0,00558472 |
| Complexin 2                                             | <i>Cplx2</i>         | -1,3668777 | 0,0015868  |
| Ring finger protein 4                                   | <i>Rnf4</i>          | -1,3668108 | 0,00065738 |
| MOB kinase activator 1B                                 | <i>Mob1b</i>         | -1,3667296 | 0,00055996 |
| NHP2 ribonucleoprotein                                  | <i>Nhp2</i>          | -1,366569  | 0,00106581 |
| Coiled-coil domain containing 23                        | <i>Ccdc23</i>        | -1,3664759 | 0,00036145 |
| Era (G-protein)-like 1 (E. Coli)                        | <i>Eral1</i>         | -1,3655403 | 0,00827619 |
| RIKEN cdna B230308N11 gene                              | <i>B230308N11Rik</i> | -1,3653189 | 0,00669654 |
| RIKEN cdna 1110001J03 gene                              | <i>1110001J03Rik</i> | -1,3652436 | 0,00365674 |
| Calumenin                                               | <i>Calu</i>          | -1,3647969 | 0,00121339 |
| Solute carrier family 44, member 1                      | <i>Slc44a1</i>       | -1,3646631 | 0,00686204 |
| Ankyrin repeat domain 17                                | <i>Ankrd17</i>       | -1,3636579 | 0,00190185 |
| Peptidylprolyl isomerase B                              | <i>Ppib</i>          | -1,3635457 | 0,00102032 |
| Carbonic anhydrase 11                                   | <i>Car11</i>         | -1,3634487 | 0,0078093  |
| Transforming growth factor, beta receptor II            | <i>Tgfb2</i>         | -1,3630331 | 0,00197898 |
| RNA-binding region (RNP1, RRM) containing 3             | <i>Rnpc3</i>         | -1,3628587 | 0,00793302 |
| Moloney leukemia virus 10                               | <i>Mov10</i>         | -1,3620052 | 0,0016849  |
| WD repeat domain 4                                      | <i>Wdr4</i>          | -1,3616678 | 0,00416532 |
| NECAP endocytosis associated 2                          | <i>Necap2</i>        | -1,3613531 | 0,00182523 |



|                                                                                       |                                 |            |            |
|---------------------------------------------------------------------------------------|---------------------------------|------------|------------|
| Death effector domain-containing                                                      | <i>Dedd</i>                     | -1,3609541 | 0,0054553  |
| Histidine triad nucleotide binding protein 1                                          | <i>Hint1</i>                    | -1,3606377 | 0,00047299 |
| DEAD (Asp-Glu-Ala-Asp) box polypeptide 24                                             | <i>Ddx24</i>                    | -1,360481  | 0,00063272 |
| Glucocorticoid modulatory element binding protein 1                                   | <i>Gmeb1</i>                    | -1,3602835 | 0,00257891 |
| Thioredoxin domain containing 5                                                       | <i>Txndc5</i>                   | -1,3601116 | 0,00092484 |
| LSM1 homolog, U6 small nuclear RNA associated (S. Cerevisiae)                         | <i>Lsm1</i>                     | -1,3597313 | 0,00206179 |
| Transcription factor Dp 1                                                             | <i>Tfdp1</i>                    | -1,3591504 | 0,00947253 |
| Mitochondrial ribosomal protein S9                                                    | <i>Mrps9</i>                    | -1,358806  | 0,00913704 |
| Zinc finger protein 574                                                               | <i>Zfp574</i>                   | -1,3586953 | 0,00171956 |
| Axin 1                                                                                | <i>Axin1</i>                    | -1,3586159 | 0,00713702 |
| NME/NM23 nucleoside diphosphate kinase 2                                              | <i>Nme2</i>                     | -1,3581724 | 0,00060813 |
| Annexin A4                                                                            | <i>Anxa4</i>                    | -1,3578764 | 0,00396456 |
| Procollagen-lysine, 2-oxoglutarate 5-dioxygenase 3                                    | <i>Plod3</i>                    | -1,3575965 | 0,00156034 |
| Transmembrane protein 258                                                             | <i>Tmem258</i>                  | -1,3574434 | 0,00382598 |
| SUMO/sentrin specific peptidase 3                                                     | <i>Senp3</i>                    | -1,3570349 | 0,00154477 |
| Minichromosome maintenance deficient 5, cell division cycle 46 (S. Cerevisiae)        | <i>Mcm5</i>                     | -1,3569216 | 0,00161879 |
| Protein tyrosine phosphatase, receptor type, K                                        | <i>Ptprk</i>                    | -1,3565744 | 0,00073612 |
| Yae1 domain containing 1                                                              | <i>Yae1d1</i>                   | -1,3565157 | 0,00084869 |
| UPF2 regulator of nonsense transcripts homolog (yeast)                                | <i>Upf2</i>                     | -1,3565147 | 0,00092266 |
| V-crk sarcoma virus CT10 oncogene homolog (avian)-like                                | <i>Crkl</i>                     | -1,3565021 | 0,0008008  |
| Excision repair cross-complementing rodent repair deficiency, complementation group 8 | <i>Ercc8</i>                    | -1,3563958 | 0,00061521 |
| RNA methyltransferase like 1                                                          | <i>Rnmtl1</i>                   | -1,3560774 | 0,00052767 |
| Paired related homeobox 1                                                             | <i>Prrx1</i>                    | -1,3559575 | 0,00046485 |
| Thiamine triphosphatase                                                               | <i>Thtpa</i>                    | -1,3559145 | 0,00087553 |
| MTERF domain containing 2                                                             | <i>Mterfd2</i>                  | -1,3557415 | 0,00349366 |
| Myogenic differentiation 1                                                            | <i>Myod1</i>                    | -1,3557231 | 0,00332087 |
| 6-phosphogluconolactonase                                                             | <i>Pgls</i>                     | -1,3552691 | 0,00195022 |
| Transmembrane protein 175                                                             | <i>Tmem175</i>                  | -1,3552261 | 0,00749904 |
| RIKEN cdna 3930401B19 gene                                                            | <i>3930401B19Rik</i>            | -1,3552157 | 0,00056579 |
| Protein phosphatase 2 (formerly 2A), catalytic subunit, beta isoform                  | <i>Ppp2cb</i>                   | -1,3551805 | 0,00999505 |
| CDC42 small effector 2                                                                | <i>Cdc42se2</i>                 | -1,3550928 | 0,00044536 |
| DPH1 homolog (S. Cerevisiae) /// candidate tumor suppressor in ovarian cancer 2       | <i>Dph1</i> /// <i>Ovca2</i>    | -1,3548741 | 0,00045761 |
| Predicted gene 3258 /// suppressor of Ty 4A                                           | <i>Gm3258</i> /// <i>Supt4a</i> | -1,3546795 | 0,00072702 |
| Glycine cleavage system protein H (aminomethyl carrier)                               | <i>Gcsh</i>                     | -1,3543018 | 0,00074896 |
| Predicted gene 10071 /// ribosomal protein L13                                        | <i>Gm10071</i> /// <i>Rpl13</i> | -1,3542836 | 0,00064278 |
| Craniofacial development protein 1                                                    | <i>Cfdp1</i>                    | -1,3540518 | 0,0014334  |
| Methylthioribose-1-phosphate isomerase homolog (S. Cerevisiae)                        | <i>Mri1</i>                     | -1,3538078 | 0,00206327 |
| Suppressor of Ty 20                                                                   | <i>Supt20</i>                   | -1,3536243 | 0,00165223 |
| OMA1 homolog, zinc metallopeptidase (S. Cerevisiae)                                   | <i>Oma1</i>                     | -1,3531216 | 0,00337965 |

|                                                                                     |                       |            |            |
|-------------------------------------------------------------------------------------|-----------------------|------------|------------|
| V-ras simian leukemia viral oncogene homolog B (ras related)                        | <i>Ralb</i>           | -1,3530351 | 0,00109053 |
| Interferon induced transmembrane protein 3                                          | <i>Ifitm3</i>         | -1,3528775 | 0,00151829 |
| Poly (ADP-ribose) glycohydrolase                                                    | <i>Parg</i>           | -1,3527618 | 0,00162433 |
| Ras homolog gene family, member C                                                   | <i>Rhoc</i>           | -1,3526325 | 0,00760977 |
| Polymerase (RNA) II (DNA directed) polypeptide C                                    | <i>Polr2c</i>         | -1,352579  | 0,00067248 |
| Metaxin 1                                                                           | <i>Mtx1</i>           | -1,3524581 | 0,00278967 |
| Protein phosphatase 1, regulatory (inhibitor) subunit 15b                           | <i>Ppp1r15b</i>       | -1,3518057 | 0,00078875 |
| Iron responsive element binding protein 2                                           | <i>Ireb2</i>          | -1,35179   | 0,00520147 |
| Transmembrane protein 243, mitochondrial                                            | <i>Tmem243</i>        | -1,3516857 | 0,00216361 |
| Sodium channel, voltage-gated, type V, alpha                                        | <i>Scn5a</i>          | -1,3516061 | 0,00711798 |
| DEAH (Asp-Glu-Ala-His) box polypeptide 9                                            | <i>Dhx9</i>           | -1,3512457 | 0,00686359 |
| Regulating synaptic membrane exocytosis 2                                           | <i>Rims2</i>          | -1,3509803 | 0,00240092 |
| Transcription elongation factor B (SIII), polypeptide 1                             | <i>Tceb1</i>          | -1,3508528 | 0,00229047 |
| SH3 domain containing ring finger 1                                                 | <i>Sh3rf1</i>         | -1,3507767 | 0,00287706 |
| F-box protein 33                                                                    | <i>Fbxo33</i>         | -1,3507426 | 0,0024164  |
| PRP39 pre-mrna processing factor 39 homolog (yeast)                                 | <i>Prpf39</i>         | -1,35046   | 0,00364777 |
| Eukaryotic translation initiation factor 5                                          | <i>Eif5</i>           | -1,3502969 | 0,00113766 |
| Mitochondrial ribosomal protein S14                                                 | <i>Mrps14</i>         | -1,3500457 | 0,00820457 |
| Mitochondrial ribosomal protein L49                                                 | <i>Mrpl49</i>         | -1,3495385 | 0,00244177 |
| UDP-N-acetyl-alpha-D-galactosamine:polypeptide N-acetylgalactosaminyltransferase 11 | <i>Galnt11</i>        | -1,3493032 | 0,00206811 |
| Family with sequence similarity 92, member A                                        | <i>Fam92a</i>         | -1,3488876 | 0,00052303 |
| Serine (or cysteine) peptidase inhibitor, clade D, member 1                         | <i>Serpind1</i>       | -1,3488252 | 0,00075179 |
| Grpel-like 1, mitochondrial                                                         | <i>Grpel1</i>         | -1,3484835 | 0,00096556 |
| YLP motif containing 1                                                              | <i>Ylpm1</i>          | -1,3481207 | 0,00187036 |
| Kelch-like 21                                                                       | <i>Klhl21</i>         | -1,3478974 | 0,00193497 |
| Activin receptor IIB                                                                | <i>Acvr2b</i>         | -1,347673  | 0,00912922 |
| NADH dehydrogenase (ubiquinone) 1 beta subcomplex 8                                 | <i>Ndufb8</i>         | -1,3472837 | 0,00437692 |
| Glucosamine-phosphate N-acetyltransferase 1                                         | <i>Gnpnat1</i>        | -1,3466537 | 0,0016849  |
| Troponin C, cardiac/slow skeletal                                                   | <i>Tnnc1</i>          | -1,3456244 | 0,00209274 |
| Dynein cytoplasmic 1 heavy chain 1                                                  | <i>Dync1h1</i>        | -1,3453945 | 0,00209682 |
| Thyroid hormone receptor associated protein 3                                       | <i>Thrap3</i>         | -1,3449113 | 0,00246176 |
| Zinc finger protein of the cerebellum 4                                             | <i>Zic4</i>           | -1,3447572 | 0,00740171 |
| Coenzyme Q9 homolog (yeast)                                                         | <i>Coq9</i>           | -1,3445714 | 0,0022653  |
| RIKEN cdna 0610031J06 gene                                                          | <i>0610031J06Rik</i>  | -1,3445005 | 0,0007016  |
| Crystallin, lambda 1                                                                | <i>Cryl1</i>          | -1,3443448 | 0,00290463 |
| THUMP domain containing 1                                                           | <i>Thumpd1</i>        | -1,3439008 | 0,00366182 |
| MMS19 (MET18 S. Cerevisiae)                                                         | <i>Mms19</i>          | -1,343794  | 0,00235673 |
| Mitochondrial ribosomal protein L53                                                 | <i>Mrpl57</i>         | -1,3425892 | 0,00968752 |
| Kxd1 motif containing 1 /// ubiquitin A-52 residue                                  | <i>Kxd1 /// Uba52</i> | -1,3424518 | 0,00082683 |
| Striatin, calmodulin binding protein 4                                              | <i>Strn4</i>          | -1,342079  | 0,0037554  |

|                                                                                                                   |                                                        |            |            |
|-------------------------------------------------------------------------------------------------------------------|--------------------------------------------------------|------------|------------|
| NDC80 homolog, kinetochore complex component (S. Cerevisiae)                                                      | <i>Ndc80</i>                                           | -1,3420624 | 0,00637796 |
| Golgi autoantigen, golgin subfamily a, 5                                                                          | <i>Golga5</i>                                          | -1,3419078 | 0,0018826  |
| Ribosomal protein L27                                                                                             | <i>Rpl27</i>                                           | -1,3407693 | 0,00273577 |
| Non imprinted in Prader-Willi/Angelman syndrome 2 homolog (human)                                                 | <i>Nipa2</i>                                           | -1,3405447 | 0,00133308 |
| Necdin-like 2                                                                                                     | <i>Ndn12</i>                                           | -1,3402513 | 0,00381242 |
| Transmembrane protein 165                                                                                         | <i>Tmem165</i>                                         | -1,3396645 | 0,00487355 |
| Malonyl-coa decarboxylase                                                                                         | <i>Mlycd</i>                                           | -1,3394669 | 0,00184814 |
| Translocase of outer mitochondrial membrane 40 homolog (yeast)                                                    | <i>Tomm40</i>                                          | -1,3393517 | 0,00455609 |
| Adenine phosphoribosyl transferase                                                                                | <i>Aprt</i>                                            | -1,3385585 | 0,00528173 |
| CREB binding protein                                                                                              | <i>Crebbp</i>                                          | -1,3384618 | 0,00192301 |
| Zinc finger protein 746                                                                                           | <i>Zfp746</i>                                          | -1,3382678 | 0,00130716 |
| Eukaryotic translation initiation factor 1 /// predicted pseudogene 5471                                          | <i>Eif1</i> /// <i>Gm5471</i>                          | -1,3377613 | 0,00077188 |
| Anti-silencing function 1B histone chaperone                                                                      | <i>Asf1b</i>                                           | -1,3373529 | 0,00134538 |
| Ngg1 interacting factor 3-like 1 (S. Pombe)                                                                       | <i>Nif3l1</i>                                          | -1,3371044 | 0,00112291 |
| Calcium modulating ligand                                                                                         | <i>Caml</i>                                            | -1,3367828 | 0,00175775 |
| THO complex 6 homolog (Drosophila)                                                                                | <i>Thoc6</i>                                           | -1,3366872 | 0,00248934 |
| Predicted gene, 17748 /// peptidyl prolyl isomerase H                                                             | <i>Gm17748</i> /// <i>Ppih</i>                         | -1,3366614 | 0,00332087 |
| RAB12, member RAS oncogene family                                                                                 | <i>Rab12</i>                                           | -1,3366018 | 0,00228856 |
| Mitochondrial ribosomal protein L2                                                                                | <i>Mrpl2</i>                                           | -1,3364543 | 0,00231981 |
| RAB9, member RAS oncogene family                                                                                  | <i>Rab9</i>                                            | -1,336123  | 0,00327836 |
| Vaccinia related kinase 1                                                                                         | <i>Vrk1</i>                                            | -1,3360625 | 0,00166902 |
| Testis development related protein                                                                                | <i>Tdrp</i>                                            | -1,3358878 | 0,00112633 |
| Ribosomal protein S8 pseudogene /// 40S ribosomal protein S8-like /// ribosomal protein S8                        | <i>Gm15501</i> /// <i>LOC101055915</i> /// <i>Rps8</i> | -1,3352712 | 0,00159035 |
| DDB1 and CUL4 associated factor 15                                                                                | <i>Dcaf15</i>                                          | -1,3352399 | 0,00342377 |
| SURP and G patch domain containing 2                                                                              | <i>Sugp2</i>                                           | -1,3345941 | 0,00919651 |
| Rab9 effector protein with kelch motifs                                                                           | <i>Rabepk</i>                                          | -1,3337619 | 0,00091988 |
| Eukaryotic translation initiation factor 3, subunit J1 /// eukaryotic translation initiation factor 3, subunit J2 | <i>Eif3j1</i> /// <i>Eif3j2</i>                        | -1,3322151 | 0,00080381 |
| Ring finger protein 44                                                                                            | <i>Rnf44</i>                                           | -1,3320347 | 0,00331433 |
| Cyclin M2                                                                                                         | <i>Cnnm2</i>                                           | -1,3318202 | 0,00319549 |
| Huntingtin interacting protein 1 related                                                                          | <i>Hip1r</i>                                           | -1,3313762 | 0,00432788 |
| Radixin                                                                                                           | <i>Rdx</i>                                             | -1,3307348 | 0,00403913 |
| Trafficking protein particle complex 6A                                                                           | <i>Trappc6a</i>                                        | -1,3305005 | 0,00172527 |
| Leucine rich repeat containing 2                                                                                  | <i>Lrrc2</i>                                           | -1,3300732 | 0,00674245 |
| Torsin family 4, member A                                                                                         | <i>Tor4a</i>                                           | -1,329622  | 0,00359623 |
| Aarf domain containing kinase 4                                                                                   | <i>Adck4</i>                                           | -1,329298  | 0,00465753 |
| Protein phosphatase 4, regulatory subunit 2                                                                       | <i>Ppp4r2</i>                                          | -1,3282616 | 0,00218315 |
| Polymerase (DNA directed), beta                                                                                   | <i>Polb</i>                                            | -1,3281328 | 0,00793149 |
| Aconitase 1                                                                                                       | <i>Aco1</i>                                            | -1,3280347 | 0,00580272 |
| Fas-associated factor 1                                                                                           | <i>Faf1</i>                                            | -1,3276973 | 0,0014144  |
| Proteasome (prosome, macropain) assembly chaperone                                                                | <i>Psmg4</i>                                           | -1,3276711 | 0,00600423 |

|                                                                                                      |                                     |            |            |
|------------------------------------------------------------------------------------------------------|-------------------------------------|------------|------------|
| ATPase, Na <sup>+</sup> /K <sup>+</sup> transporting, alpha 1 polypeptide                            | <i>Atp1a1</i>                       | -1,326678  | 0,00086967 |
| Meningioma expressed antigen 5 (hyaluronidase)                                                       | <i>Mgea5</i>                        | -1,3266474 | 0,00317703 |
| Cholinergic receptor, nicotinic, alpha polypeptide 1 (muscle)                                        | <i>Chrna1</i>                       | -1,3265625 | 0,0030439  |
| Interferon regulatory factor 9                                                                       | <i>Irf9</i>                         | -1,3264722 | 0,00609927 |
| Heterogeneous nuclear ribonucleoprotein F                                                            | <i>Hnrnpf</i>                       | -1,3264348 | 0,00416612 |
| Polypyrimidine tract binding protein 2                                                               | <i>Ptbp2</i>                        | -1,3263515 | 0,00867657 |
| Potassium channel modulatory factor 1                                                                | <i>Kcmf1</i>                        | -1,3256361 | 0,0022963  |
| Signal recognition particle receptor, B subunit                                                      | <i>Srprb</i>                        | -1,3254156 | 0,0016836  |
| Serine/threonine kinase 19                                                                           | <i>Stk19</i>                        | -1,3254065 | 0,00164393 |
| Small integral membrane protein 7                                                                    | <i>Smim7</i>                        | -1,3253468 | 0,00273404 |
| G-rich RNA sequence binding factor 1                                                                 | <i>Grsf1</i>                        | -1,3252173 | 0,00965863 |
| Splicing factor proline/glutamine rich (polypyrimidine tract binding protein associated)             | <i>Sfpq</i>                         | -1,325117  | 0,00107541 |
| Tectonic family member 3                                                                             | <i>Tctn3</i>                        | -1,3249514 | 0,00543821 |
| Mannose-6-phosphate receptor, cation dependent                                                       | <i>M6pr</i>                         | -1,3249413 | 0,00525868 |
| Family with sequence similarity 220, member A                                                        | <i>Fam220a</i>                      | -1,3236407 | 0,00211912 |
| Zinc finger CCCH-type containing 18                                                                  | <i>Zc3h18</i>                       | -1,3236085 | 0,00453016 |
| Rala binding protein 1                                                                               | <i>Ralbp1</i>                       | -1,3228891 | 0,00599674 |
| Suppression of tumorigenicity 5                                                                      | <i>St5</i>                          | -1,3222113 | 0,00508101 |
| Nuclear receptor coactivator 6                                                                       | <i>Ncoa6</i>                        | -1,3216515 | 0,00440435 |
| Calcium/calmodulin-dependent protein kinase kinase 1, alpha                                          | <i>Camkk1</i>                       | -1,3213661 | 0,00563905 |
| Tetratricopeptide repeat, ankyrin repeat and coiled-coil containing 1                                | <i>Tanc1</i>                        | -1,3212214 | 0,00114985 |
| RMI1, recq mediated genome instability 1, homolog (S. Cerevisiae)                                    | <i>Rmi1</i>                         | -1,3210134 | 0,00135785 |
| Tissue factor pathway inhibitor                                                                      | <i>Tfpi</i>                         | -1,3209459 | 0,00133688 |
| Heat shock protein 8                                                                                 | <i>Hspa8</i>                        | -1,3208261 | 0,00476492 |
| Cyclin Pas1/PHO80 domain containing 1                                                                | <i>Cnppd1</i>                       | -1,3207001 | 0,00168646 |
| Lipoyltransferase 1                                                                                  | <i>Lipt1</i>                        | -1,3203321 | 0,0036098  |
| Arginine glutamic acid dipeptide (RE) repeats                                                        | <i>Rere</i>                         | -1,3191086 | 0,00554985 |
| Regulator of G-protein signaling 3                                                                   | <i>Rgs3</i>                         | -1,3189592 | 0,00256548 |
| Heterogeneous nuclear ribonucleoprotein A3 pseudogene /// heterogeneous nuclear ribonucleoprotein A3 | <i>Gm6793 ///</i><br><i>Hnrnpa3</i> | -1,3179423 | 0,00218548 |
| Coiled-coil domain containing 166                                                                    | <i>Ccdc166</i>                      | -1,3174177 | 0,00820851 |
| Transcription factor B2, mitochondrial                                                               | <i>Tfb2m</i>                        | -1,3172364 | 0,00130222 |
| Sulfatase modifying factor 1                                                                         | <i>Sumf1</i>                        | -1,3170449 | 0,00362656 |
| Glutamine-rich 1                                                                                     | <i>Qrich1</i>                       | -1,3169632 | 0,00132902 |
| Phospholipase D family, member 3                                                                     | <i>Pld3</i>                         | -1,3169436 | 0,00600022 |
| Predicted pseudogene 8069 /// translocase of outer mitochondrial membrane 5 homolog (yeast)          | <i>Gm8069 ///</i><br><i>Tomm5</i>   | -1,3165018 | 0,00194985 |
| Spermatogenesis associated 5                                                                         | <i>Spata5</i>                       | -1,3163539 | 0,00844499 |
| Mitogen-activated protein kinase kinase 4                                                            | <i>Map2k4</i>                       | -1,3158266 | 0,00451918 |
| Cell division cycle 20                                                                               | <i>Cdc20</i>                        | -1,3149905 | 0,00690341 |
| SMAD family member 5                                                                                 | <i>Smad5</i>                        | -1,3149388 | 0,00495596 |
| Adenosine monophosphate deaminase 2                                                                  | <i>Ampd2</i>                        | -1,3142382 | 0,00564545 |

|                                                                              |                            |            |            |
|------------------------------------------------------------------------------|----------------------------|------------|------------|
| Ly1 antibody reactive clone                                                  | <i>Lyar</i>                | -1,3139791 | 0,00509759 |
| Ribosomal protein L14 /// ribosomal protein L14, pseudogene 1                | <i>Rpl14 /// Rpl14-ps1</i> | -1,3135725 | 0,00216542 |
| Small nuclear RNA activating complex, polypeptide 3                          | <i>Snape3</i>              | -1,3135402 | 0,00162604 |
| Jun dimerization protein 2                                                   | <i>Jdp2</i>                | -1,3127204 | 0,00210952 |
| Exostoses (multiple) 2                                                       | <i>Ext2</i>                | -1,3126028 | 0,00206213 |
| Ubiquitin fusion degradation 1 like                                          | <i>Ufd1l</i>               | -1,312436  | 0,00492026 |
| Ninjurin 1                                                                   | <i>Ninj1</i>               | -1,311904  | 0,00633542 |
| Zinc finger protein 598                                                      | <i>Zfp598</i>              | -1,3118126 | 0,00519463 |
| Activator of basal transcription 1                                           | <i>Abt1</i>                | -1,3117281 | 0,00391993 |
| Solute carrier family 22 (organic cation transporter), member 5              | <i>Slc22a5</i>             | -1,3114843 | 0,00241931 |
| Ring finger and WD repeat domain 2                                           | <i>Rfwd2</i>               | -1,3112673 | 0,00258173 |
| Dedicator of cytokinesis 5                                                   | <i>Dock5</i>               | -1,3107247 | 0,00375784 |
| Oxysterol binding protein                                                    | <i>Osbp</i>                | -1,3103041 | 0,00118631 |
| Ras homolog enriched in brain                                                | <i>Rheb</i>                | -1,3097625 | 0,00160982 |
| Cellular retinoic acid binding protein II                                    | <i>Crabp2</i>              | -1,309286  | 0,00129859 |
| BRISC and BRCA1 A complex member 1                                           | <i>Babam1</i>              | -1,3092284 | 0,00303338 |
| Transcription factor 25 (basic helix-loop-helix)                             | <i>Tcf25</i>               | -1,3091429 | 0,00412964 |
| Eukaryotic translation elongation factor 1 beta 2                            | <i>Eef1b2</i>              | -1,3088871 | 0,00188711 |
| SET domain containing 3                                                      | <i>Setd3</i>               | -1,3086155 | 0,00127547 |
| RAB30, member RAS oncogene family                                            | <i>Rab30</i>               | -1,3084321 | 0,00218548 |
| Polyhomeotic-like 1 (Drosophila)                                             | <i>Phc1</i>                | -1,3082457 | 0,00207626 |
| Flt3 interacting zinc finger protein 1                                       | <i>Fiz1</i>                | -1,3082161 | 0,00204198 |
| Transcription elongation factor B (SIII), polypeptide 3                      | <i>Tceb3</i>               | -1,3081592 | 0,00659165 |
| Transmembrane emp24 protein transport domain containing 9                    | <i>Tmed9</i>               | -1,3075883 | 0,00783824 |
| SAP30 binding protein                                                        | <i>Sap30bp</i>             | -1,30741   | 0,00703044 |
| Casein kinase 1, gamma 1                                                     | <i>Csnk1g1</i>             | -1,3071138 | 0,00987942 |
| Monoamine oxidase A                                                          | <i>Maoa</i>                | -1,3070755 | 0,0017522  |
| Transmembrane 4 superfamily member 1                                         | <i>Tm4sf1</i>              | -1,306832  | 0,0018366  |
| V-myc myelocytomatosis viral related oncogene, neuroblastoma derived (avian) | <i>Mycn</i>                | -1,306336  | 0,0042478  |
| Protein phosphatase 3, catalytic subunit, beta isoform                       | <i>Ppp3cb</i>              | -1,306151  | 0,00277875 |
| Intercellular adhesion molecule 4, Landsteiner-Wiener blood group            | <i>Icam4</i>               | -1,3058289 | 0,0093523  |
| WD repeat domain containing 82                                               | <i>Wdr82</i>               | -1,3056994 | 0,00667494 |
| ATPase, H <sup>+</sup> transporting, lysosomal V0 subunit C                  | <i>Atp6v0c</i>             | -1,3051779 | 0,00258752 |
| WW domain containing transcription regulator 1                               | <i>Wwtr1</i>               | -1,3051408 | 0,00409497 |
| Coiled-coil domain containing 88C                                            | <i>Ccdc88c</i>             | -1,3049583 | 0,00947783 |
| Inositol (myo)-1(or 4)-monophosphatase 1                                     | <i>Impa1</i>               | -1,3044127 | 0,00672941 |
| Ubiquitin domain containing 1                                                | <i>Ubtd1</i>               | -1,3043982 | 0,00693328 |
| Ubiquinol-cytochrome c reductase, complex III subunit VII                    | <i>Uqcrcq</i>              | -1,3037967 | 0,00415781 |
| V-raf-leukemia viral oncogene 1                                              | <i>Raf1</i>                | -1,3037794 | 0,00265497 |
| Zinc finger and BTB domain containing 18                                     | <i>Zbtb18</i>              | -1,3035698 | 0,0024318  |
| BTB and CNC homology 1                                                       | <i>Bach1</i>               | -1,3033604 | 0,00435243 |

|                                                                                 |                                                      |            |            |
|---------------------------------------------------------------------------------|------------------------------------------------------|------------|------------|
| Glycyl-trna synthetase                                                          | <i>Gars</i>                                          | -1,3026342 | 0,00437392 |
| Nudix (nucleoside diphosphate linked moiety X)-type motif 21                    | <i>Nudt21</i>                                        | -1,302414  | 0,00129276 |
| Dynamin binding protein                                                         | <i>Dnmbp</i>                                         | -1,3021222 | 0,00557044 |
| NSA2 ribosome biogenesis homolog (S. Cerevisiae)                                | <i>Nsa2</i>                                          | -1,3021052 | 0,00299058 |
| Sorting nexin 5                                                                 | <i>Snx5</i>                                          | -1,3018595 | 0,00248297 |
| PHD finger protein 20                                                           | <i>Phf20</i>                                         | -1,3007603 | 0,00122682 |
| Transmembrane protein 160                                                       | <i>Tmem160</i>                                       | -1,3007256 | 0,00621886 |
| Tight junction protein 2                                                        | <i>Tjp2</i>                                          | -1,3005734 | 0,00810042 |
| Structural maintenance of chromosomes 4                                         | <i>Smc4</i>                                          | -1,2999074 | 0,00425191 |
| Histone cluster 1, h2bc /// histone cluster 1, h2be /// histone cluster 1, h2bg | <i>Hist1h2bc ///<br/>Hist1h2be ///<br/>Hist1h2bg</i> | -1,2987979 | 0,00410655 |
| U2 small nuclear ribonucleoprotein B                                            | <i>Snrpb2</i>                                        | -1,2986471 | 0,00266679 |
| Forkhead box J3                                                                 | <i>Foxj3</i>                                         | -1,2981995 | 0,00429576 |
| Mitochondrial ribosomal protein S2                                              | <i>Mrps2</i>                                         | -1,2980735 | 0,00272887 |
| Tetraspanin 3                                                                   | <i>Tspan3</i>                                        | -1,2980451 | 0,00123063 |
| Expressed sequence AI646383                                                     | <i>AI646383</i>                                      | -1,2980415 | 0,00609317 |
| Heat shock protein 1 (chaperonin)                                               | <i>Hspd1</i>                                         | -1,2979654 | 0,0098692  |
| Protein phosphatase 1A, magnesium dependent, alpha isoform                      | <i>Ppm1a</i>                                         | -1,2979003 | 0,00135785 |
| Protein phosphatase 1, catalytic subunit, alpha isoform                         | <i>Ppp1ca</i>                                        | -1,2973889 | 0,00105979 |
| Zinc finger protein 358                                                         | <i>Zfp358</i>                                        | -1,2973617 | 0,00861418 |
| Retinitis pigmentosa 9 (human)                                                  | <i>Rp9</i>                                           | -1,2972694 | 0,00368255 |
| Solute carrier family 5, member 4a                                              | <i>Slc5a4a</i>                                       | -1,2971036 | 0,00967531 |
| Checkpoint with forkhead and ring finger domains                                | <i>Chfr</i>                                          | -1,2970913 | 0,00697761 |
| Peroxisome proliferator activated receptor alpha                                | <i>Ppara</i>                                         | -1,2970431 | 0,00681956 |
| Sorting nexin 1                                                                 | <i>Snx1</i>                                          | -1,2966004 | 0,00221532 |
| Calcium/calmodulin-dependent protein kinase ID                                  | <i>Camk1d</i>                                        | -1,2965924 | 0,00779299 |
| Coiled-coil domain containing 71                                                | <i>Ccdc71</i>                                        | -1,296323  | 0,008325   |
| MAP/microtubule affinity-regulating kinase 3                                    | <i>Mark3</i>                                         | -1,2961938 | 0,00625051 |
| Trimethylguanosine synthase homolog (S. Cerevisiae)                             | <i>Tgs1</i>                                          | -1,2958578 | 0,00849747 |
| Zinc finger protein 937                                                         | <i>Zfp937</i>                                        | -1,2957811 | 0,00391993 |
| DEAD (Asp-Glu-Ala-Asp) box polypeptide 20                                       | <i>Ddx20</i>                                         | -1,2956852 | 0,00572459 |
| H2A histone family, member J                                                    | <i>H2afj</i>                                         | -1,2951546 | 0,00703956 |
| A kinase (PRKA) anchor protein 1                                                | <i>Akap1</i>                                         | -1,2944974 | 0,00828491 |
| BRCA1/BRCA2-containing complex, subunit 3                                       | <i>Brcc3</i>                                         | -1,2944604 | 0,00430637 |
| Ankyrin repeat and sterile alpha motif domain containing 3                      | <i>Anks3</i>                                         | -1,293431  | 0,00465766 |
| Predicted gene 13363 /// protein tyrosine phosphatase 4a1                       | <i>Gm13363 /// Ptp4a1</i>                            | -1,2933346 | 0,00503404 |
| Phosphatidylserine synthase 2                                                   | <i>Ptdss2</i>                                        | -1,2931598 | 0,00359623 |
| Nucleophosmin 1                                                                 | <i>Npm1</i>                                          | -1,2917716 | 0,00920234 |
| Aftiphilin                                                                      | <i>Aftph</i>                                         | -1,2914376 | 0,00125176 |
| Programmed cell death 2                                                         | <i>Pdcd2</i>                                         | -1,2913408 | 0,00459816 |
| Guanine nucleotide binding protein (G protein), beta polypeptide 2 like 1       | <i>Gnb2l1</i>                                        | -1,2911748 | 0,00152358 |

|                                                                                                                                                                                                                                                                                                                |                                                                                                                                                                                                                                    |            |            |
|----------------------------------------------------------------------------------------------------------------------------------------------------------------------------------------------------------------------------------------------------------------------------------------------------------------|------------------------------------------------------------------------------------------------------------------------------------------------------------------------------------------------------------------------------------|------------|------------|
| Dnaj (Hsp40) homolog, subfamily C, member 13                                                                                                                                                                                                                                                                   | <i>Dnajc13</i>                                                                                                                                                                                                                     | -1,2902246 | 0,00371811 |
| Ribosomal protein S6 /// ribosomal protein S6, pseudogene 4                                                                                                                                                                                                                                                    | <i>Rps6</i> /// <i>Rps6-ps4</i>                                                                                                                                                                                                    | -1,2891263 | 0,00238389 |
| Transmembrane protein 184C                                                                                                                                                                                                                                                                                     | <i>Tmem184c</i>                                                                                                                                                                                                                    | -1,2888437 | 0,00440142 |
| Six transmembrane epithelial antigen of the prostate 1                                                                                                                                                                                                                                                         | <i>Steap1</i>                                                                                                                                                                                                                      | -1,2875608 | 0,00156211 |
| Tight junction associated protein 1                                                                                                                                                                                                                                                                            | <i>Tjap1</i>                                                                                                                                                                                                                       | -1,2872952 | 0,00647022 |
| DEAD (Asp-Glu-Ala-Asp) box polypeptide 49                                                                                                                                                                                                                                                                      | <i>Ddx49</i>                                                                                                                                                                                                                       | -1,2871154 | 0,00530349 |
| Protein kinase, membrane associated tyrosine/threonine 1                                                                                                                                                                                                                                                       | <i>Pkmyt1</i>                                                                                                                                                                                                                      | -1,286965  | 0,00336167 |
| Ring finger protein 8                                                                                                                                                                                                                                                                                          | <i>Rnf8</i>                                                                                                                                                                                                                        | -1,2868529 | 0,00224186 |
| Calmodulin regulated spectrin-associated protein 1                                                                                                                                                                                                                                                             | <i>Camsap1</i>                                                                                                                                                                                                                     | -1,2866231 | 0,00739845 |
| Complement component 1, r subcomponent A                                                                                                                                                                                                                                                                       | <i>C1ra</i>                                                                                                                                                                                                                        | -1,2864829 | 0,00445643 |
| EH-domain containing 4                                                                                                                                                                                                                                                                                         | <i>Ehd4</i>                                                                                                                                                                                                                        | -1,286318  | 0,00250828 |
| Increased sodium tolerance 1 homolog (yeast)                                                                                                                                                                                                                                                                   | <i>Ist1</i>                                                                                                                                                                                                                        | -1,2862283 | 0,00371082 |
| Nuclear receptor coactivator 1                                                                                                                                                                                                                                                                                 | <i>Ncoa1</i>                                                                                                                                                                                                                       | -1,2860723 | 0,00447787 |
| Cold shock domain containing E1, RNA binding                                                                                                                                                                                                                                                                   | <i>Csde1</i>                                                                                                                                                                                                                       | -1,2854945 | 0,00290384 |
| DEAD (Asp-Glu-Ala-Asp) box polypeptide 39B                                                                                                                                                                                                                                                                     | <i>Ddx39b</i>                                                                                                                                                                                                                      | -1,285232  | 0,00317583 |
| AT rich interactive domain 1A (SWI-like)                                                                                                                                                                                                                                                                       | <i>Arid1a</i>                                                                                                                                                                                                                      | -1,2849504 | 0,00896808 |
| SH3-domain GRB2-like B1 (endophilin)                                                                                                                                                                                                                                                                           | <i>Sh3glb1</i>                                                                                                                                                                                                                     | -1,2849005 | 0,0047134  |
| Predicted gene 10420 /// predicted gene 6139 /// predicted gene 8841 /// predicted gene 8842 /// ribosomal protein S2                                                                                                                                                                                          | <i>Gm10420</i> /// <i>Gm6139</i> /// <i>Gm8841</i> /// <i>Gm8842</i> /// <i>Rps2</i>                                                                                                                                               | -1,2845977 | 0,00194666 |
| Histone cluster 1, h2bc /// histone cluster 1, h2be /// histone cluster 1, h2bf /// histone cluster 1, h2bg /// histone cluster 1, h2bj /// histone cluster 1, h2bl /// histone cluster 1, h2bm /// histone cluster 1, h2bn /// histone cluster 1, h2bp /// histone cluster 1, h2bq /// histone cluster 1 h2br | <i>Hist1h2bc</i> /// <i>Hist1h2be</i> /// <i>Hist1h2bf</i> /// <i>Hist1h2bg</i> /// <i>Hist1h2bj</i> /// <i>Hist1h2bl</i> /// <i>Hist1h2bm</i> /// <i>Hist1h2bn</i> /// <i>Hist1h2bp</i> /// <i>Hist1h2bq</i> /// <i>Hist1h2br</i> | -1,2845948 | 0,00342875 |
| Heme oxygenase (decycling) 2                                                                                                                                                                                                                                                                                   | <i>Hmox2</i>                                                                                                                                                                                                                       | -1,2840568 | 0,00285018 |
| Translocase of inner mitochondrial membrane 23                                                                                                                                                                                                                                                                 | <i>Timm23</i>                                                                                                                                                                                                                      | -1,2838018 | 0,00178957 |
| Mitochondrial ribosomal protein S6                                                                                                                                                                                                                                                                             | <i>Mrps6</i>                                                                                                                                                                                                                       | -1,2837837 | 0,00515454 |
| GlutaminyI-trna synthetase                                                                                                                                                                                                                                                                                     | <i>Qars</i>                                                                                                                                                                                                                        | -1,2837155 | 0,00348603 |
| Nuclear autoantigenic sperm protein (histone-binding)                                                                                                                                                                                                                                                          | <i>Nasp</i>                                                                                                                                                                                                                        | -1,2836996 | 0,00257993 |
| TAP binding protein                                                                                                                                                                                                                                                                                            | <i>Tapbp</i>                                                                                                                                                                                                                       | -1,2834837 | 0,00919634 |
| Gene trap locus 3                                                                                                                                                                                                                                                                                              | <i>Gtl3</i>                                                                                                                                                                                                                        | -1,2831649 | 0,00377121 |
| AT rich interactive domain 5B (MRF1-like)                                                                                                                                                                                                                                                                      | <i>Arid5b</i>                                                                                                                                                                                                                      | -1,2825715 | 0,00656953 |
| Trna isopentenyltransferase 1                                                                                                                                                                                                                                                                                  | <i>Trit1</i>                                                                                                                                                                                                                       | -1,2821478 | 0,0041625  |
| CAS1 domain containing 1                                                                                                                                                                                                                                                                                       | <i>Casd1</i>                                                                                                                                                                                                                       | -1,2819132 | 0,00383507 |
| Transportin 2 (importin 3, karyopherin beta 2b)                                                                                                                                                                                                                                                                | <i>Tnpo2</i>                                                                                                                                                                                                                       | -1,2814198 | 0,00844793 |
| Serpine1 mrna binding protein 1                                                                                                                                                                                                                                                                                | <i>Serbp1</i>                                                                                                                                                                                                                      | -1,2810461 | 0,00460083 |
| Jumping translocation breakpoint                                                                                                                                                                                                                                                                               | <i>Jtb</i>                                                                                                                                                                                                                         | -1,2809629 | 0,00271118 |
| Hyaluronoglucosaminidase 2                                                                                                                                                                                                                                                                                     | <i>Hyal2</i>                                                                                                                                                                                                                       | -1,2799986 | 0,00420874 |
| Fat mass and obesity associated                                                                                                                                                                                                                                                                                | <i>Fto</i>                                                                                                                                                                                                                         | -1,279337  | 0,00577733 |

|                                                                                                                   |                                 |            |            |
|-------------------------------------------------------------------------------------------------------------------|---------------------------------|------------|------------|
| Heterogeneous nuclear ribonucleoprotein L-like                                                                    | <i>Hnrnp1l</i>                  | -1,2790606 | 0,00474874 |
| N-terminal Xaa-Pro-Lys N-methyltransferase 1                                                                      | <i>Ntmt1</i>                    | -1,2787182 | 0,00890829 |
| Natural killer tumor recognition sequence                                                                         | <i>Nktr</i>                     | -1,2781775 | 0,0098407  |
| Angiomotin-like 2                                                                                                 | <i>Amotl2</i>                   | -1,2777194 | 0,00404085 |
| DEAD (Asp-Glu-Ala-Asp) box polypeptide 19a ///<br>DEAD (Asp-Glu-Ala-Asp) box polypeptide 19b                      | <i>Ddx19a</i> /// <i>Ddx19b</i> | -1,2770209 | 0,00845727 |
| Ceroid-lipofuscinosis, neuronal 8                                                                                 | <i>Cln8</i>                     | -1,2766295 | 0,00581212 |
| 3-hydroxy-3-methylglutaryl-Coenzyme A reductase                                                                   | <i>Hmgcr</i>                    | -1,2756734 | 0,00519203 |
| Mitochondrial ribosomal protein S34                                                                               | <i>Mrps34</i>                   | -1,2750963 | 0,00550333 |
| Polycystic kidney disease 2                                                                                       | <i>Pkd2</i>                     | -1,2749734 | 0,00201029 |
| Copine III                                                                                                        | <i>Cpne3</i>                    | -1,2748139 | 0,00286492 |
| Trafficking protein particle complex 12                                                                           | <i>Trappc12</i>                 | -1,2740359 | 0,00250933 |
| Lysine (K)-specific demethylase 2B                                                                                | <i>Kdm2b</i>                    | -1,2739493 | 0,00564363 |
| La ribonucleoprotein domain family, member 1                                                                      | <i>Larp1</i>                    | -1,2738553 | 0,00211113 |
| Upregulated during skeletal muscle growth 5                                                                       | <i>Usmg5</i>                    | -1,2724119 | 0,00880746 |
| Zinc finger protein 354B                                                                                          | <i>Zfp354b</i>                  | -1,2721526 | 0,00316229 |
| Sema domain, immunoglobulin domain (Ig), short<br>basic domain, secreted, (semaphorin) 3B                         | <i>Sema3b</i>                   | -1,2712656 | 0,00464004 |
| Cytidine 5'-triphosphate synthase 2                                                                               | <i>Ctps2</i>                    | -1,2702922 | 0,00427473 |
| Tripartite motif-containing 27                                                                                    | <i>Trim27</i>                   | -1,2700776 | 0,00856457 |
| Platelet-activating factor acetylhydrolase, isoform 1b,<br>subunit 2                                              | <i>Pafah1b2</i>                 | -1,2699855 | 0,00970412 |
| Taurine upregulated gene 1                                                                                        | <i>Tug1</i>                     | -1,2680684 | 0,00334486 |
| Dolichyl-phosphate (UDP-N-acetylglucosamine)<br>acetylglucosaminophosphotransferase 1 (glcnac-1-P<br>transferase) | <i>Dpagt1</i>                   | -1,2675105 | 0,00404687 |
| KH domain containing, RNA binding, signal<br>transduction associated 1                                            | <i>Khdrbs1</i>                  | -1,2673234 | 0,00658988 |
| Digeorge syndrome critical region gene 2                                                                          | <i>Dgcr2</i>                    | -1,2667848 | 0,00751963 |
| Ribosomal protein SA                                                                                              | <i>Rpsa</i>                     | -1,266516  | 0,00386772 |
| Transmembrane protein 134                                                                                         | <i>Tmem134</i>                  | -1,2664549 | 0,00572271 |
| Eukaryotic translation initiation factor 2B, subunit 1<br>(alpha)                                                 | <i>Eif2b1</i>                   | -1,2657599 | 0,00382598 |
| B cell leukemia/lymphoma 10                                                                                       | <i>Bcl10</i>                    | -1,2655486 | 0,00694831 |
| Brain abundant, membrane attached signal protein 1                                                                | <i>Basp1</i>                    | -1,2653039 | 0,00258824 |
| Polymerase (RNA) II (DNA directed) polypeptide G                                                                  | <i>Polr2g</i>                   | -1,2652343 | 0,00899818 |
| MOB kinase activator 1A                                                                                           | <i>Mob1a</i>                    | -1,2648486 | 0,00919471 |
| Laminin B1                                                                                                        | <i>Lamb1</i>                    | -1,2648192 | 0,00984768 |
| Zinc finger, CCHC domain containing 6                                                                             | <i>Zcchc6</i>                   | -1,2633362 | 0,00967061 |
| Small nuclear ribonucleoprotein polypeptide G                                                                     | <i>Snrpg</i>                    | -1,262844  | 0,00472295 |
| WD repeat domain, phosphoinositide interacting 1                                                                  | <i>Wipi1</i>                    | -1,2613378 | 0,00965065 |
| Protein phosphatase 3, catalytic subunit, alpha isoform                                                           | <i>Ppp3ca</i>                   | -1,2609396 | 0,00920234 |
| STIP1 homology and U-Box containing protein 1                                                                     | <i>Stub1</i>                    | -1,2604673 | 0,00452485 |
| Sequestosome 1                                                                                                    | <i>Sqstm1</i>                   | -1,2601815 | 0,00240092 |
| GID complex subunit 4, VID24 homolog (S. Cerevisiae)                                                              | <i>Gid4</i>                     | -1,2598659 | 0,00933976 |
| NOL1/NOP2/Sun domain family member 2                                                                              | <i>Nsun2</i>                    | -1,2593897 | 0,00305857 |
| WAS protein family, member 2                                                                                      | <i>Wasf2</i>                    | -1,2591478 | 0,00580697 |



|                                                        |                      |            |            |
|--------------------------------------------------------|----------------------|------------|------------|
| Glutamyl-prolyl-trna synthetase                        | <i>Eprs</i>          | -1,258936  | 0,00505066 |
| Endoplasmic reticulum aminopeptidase 1                 | <i>Erap1</i>         | -1,2575368 | 0,006245   |
| Complement component factor h                          | <i>Cfh</i>           | -1,2573938 | 0,00729833 |
| Ubiquitin-conjugating enzyme E2I                       | <i>Ube2i</i>         | -1,2570384 | 0,00486792 |
| Ribosomal protein S18                                  | <i>Rps18</i>         | -1,2570026 | 0,00301573 |
| Heterogeneous nuclear ribonucleoprotein U              | <i>Hnrnpu</i>        | -1,2556769 | 0,00412602 |
| Transmembrane protein 234                              | <i>Tmem234</i>       | -1,2548406 | 0,00691904 |
| Tumor protein D52-like 2                               | <i>Tpd52l2</i>       | -1,2548302 | 0,00354108 |
| Homeodomain interacting protein kinase 1               | <i>Hipk1</i>         | -1,2541372 | 0,0067176  |
| CKLF-like MARVEL transmembrane domain containing 3     | <i>Cmtm3</i>         | -1,253692  | 0,00309332 |
| CUE domain containing 2                                | <i>Cuedc2</i>        | -1,253594  | 0,00975669 |
| RIKEN cdna 1110059E24 gene                             | <i>1110059E24Rik</i> | -1,2524145 | 0,00360978 |
| Amyloid beta (A4) precursor-like protein 2             | <i>Aplp2</i>         | -1,2499177 | 0,00712605 |
| Heat shock factor binding protein 1                    | <i>Hsbp1</i>         | -1,2499086 | 0,00368697 |
| Leucine rich repeat containing 59                      | <i>Lrrc59</i>        | -1,2490071 | 0,00563905 |
| Cell division cycle 5-like (S. Pombe)                  | <i>Cdc5l</i>         | -1,2481402 | 0,00552176 |
| Myosin VA                                              | <i>Myo5a</i>         | -1,2480049 | 0,0056851  |
| Zinc metallopeptidase, STE24                           | <i>Zmpste24</i>      | -1,2477531 | 0,00886977 |
| Rho guanine nucleotide exchange factor (GEF) 12        | <i>Arhgef12</i>      | -1,2476985 | 0,00933976 |
| RIKEN cdna 4933426M11 gene                             | <i>4933426M11Rik</i> | -1,2463169 | 0,00583159 |
| Mature T cell proliferation 1                          | <i>Mtcp1</i>         | -1,2453009 | 0,00850857 |
| F-box and WD-40 domain protein 9                       | <i>Fbxw9</i>         | -1,2452619 | 0,0037885  |
| Ribosomal protein S28                                  | <i>Rps28</i>         | -1,244866  | 0,00358    |
| AHA1, activator of heat shock protein atpase 1         | <i>Ahsa1</i>         | -1,2444935 | 0,00818232 |
| Tissue inhibitor of metalloproteinase 1                | <i>Timp1</i>         | -1,2439144 | 0,00691157 |
| Armadillo repeat containing 10                         | <i>Armc10</i>        | -1,2436546 | 0,00844261 |
| Ceramide synthase 2                                    | <i>Cers2</i>         | -1,2435895 | 0,00417842 |
| Ring finger protein 220                                | <i>Rnf220</i>        | -1,2434506 | 0,00782947 |
| NADH dehydrogenase (ubiquinone) 1 alpha subcomplex, 4  | <i>Ndufa4</i>        | -1,2434103 | 0,00971267 |
| CCR4-NOT transcription complex, subunit 6              | <i>Cnot6</i>         | -1,2430205 | 0,00878405 |
| Prohibitin 2                                           | <i>Phb2</i>          | -1,2429736 | 0,00905146 |
| Solute carrier family 41, member 1                     | <i>Slc41a1</i>       | -1,2427921 | 0,00896726 |
| Vang-like 2 (van gogh, Drosophila)                     | <i>Vangl2</i>        | -1,242777  | 0,0047893  |
| Nucleolar complex associated 4 homolog (S. Cerevisiae) | <i>Noc4l</i>         | -1,2416448 | 0,00449462 |
| Ribosomal protein S2                                   | <i>Rps2</i>          | -1,2408877 | 0,00505213 |
| Ribosomal protein L11                                  | <i>Rpl11</i>         | -1,2398668 | 0,00424622 |
| Secreted acidic cysteine rich glycoprotein             | <i>Sparc</i>         | -1,2396918 | 0,00361493 |
| Spermidine/spermine N1-acetyl transferase 1            | <i>Sat1</i>          | -1,2391896 | 0,00887822 |
| Ligase III, DNA, ATP-dependent                         | <i>Lig3</i>          | -1,2391337 | 0,00425111 |
| Retinoblastoma binding protein 4                       | <i>Rbbp4</i>         | -1,23866   | 0,00572459 |
| Mitochondrial ribosomal protein L44                    | <i>Mrpl44</i>        | -1,2385716 | 0,00972162 |
| Karyopherin (importin) beta 1                          | <i>Kpnb1</i>         | -1,2385552 | 0,00674605 |

|                                                                             |                          |            |            |
|-----------------------------------------------------------------------------|--------------------------|------------|------------|
| DEAD/H (Asp-Glu-Ala-Asp/His) box polypeptide 3, X-linked                    | <i>Ddx3x</i>             | -1,2380816 | 0,00784432 |
| WD repeat domain 61                                                         | <i>Wdr61</i>             | -1,2380119 | 0,00993476 |
| Ribosomal L24 domain containing 1                                           | <i>Rsl24d1</i>           | -1,2378915 | 0,00695677 |
| WD repeat domain 75                                                         | <i>Wdr75</i>             | -1,2374292 | 0,00762642 |
| BTB (POZ) domain containing 1                                               | <i>Btbd1</i>             | -1,2373559 | 0,00843453 |
| Chromatin target of PRMT1                                                   | <i>Chtop</i>             | -1,2362104 | 0,00605997 |
| Sestrin 3                                                                   | <i>Sesn3</i>             | -1,235405  | 0,00847816 |
| Actin related protein 2/3 complex, subunit 1B /// predicted pseudogene 5637 | <i>Arpc1b /// Gm5637</i> | -1,2339399 | 0,00722147 |
| STE20-like kinase                                                           | <i>Slk</i>               | -1,2334486 | 0,00761074 |
| Ankyrin repeat and zinc finger domain containing 1                          | <i>Ankzf1</i>            | -1,2307969 | 0,00999717 |
| Tuberous sclerosis 1                                                        | <i>Tsc1</i>              | -1,2303183 | 0,00818718 |
| Solute carrier family 25, member 51                                         | <i>Slc25a51</i>          | -1,230027  | 0,00662571 |
| Bromodomain and PHD finger containing, 1                                    | <i>Brpf1</i>             | -1,2291561 | 0,00639022 |
| Heat shock protein 9                                                        | <i>Hspa9</i>             | -1,2291101 | 0,00712605 |
| RAB24, member RAS oncogene family                                           | <i>Rab24</i>             | -1,228365  | 0,00998206 |
| Acyl-Coenzyme A dehydrogenase, medium chain                                 | <i>Acadm</i>             | -1,227889  | 0,00969837 |
| Chloride intracellular channel 4 (mitochondrial)                            | <i>Clic4</i>             | -1,2262202 | 0,00537209 |
| PDZ and LIM domain 1 (elfin)                                                | <i>Pdlim1</i>            | -1,2256053 | 0,00895794 |
| Ribosomal protein S6 kinase, polypeptide 2                                  | <i>Rps6kb2</i>           | -1,2253649 | 0,00908973 |
| Ribosomal protein, large, P0                                                | <i>Rplp0</i>             | -1,2203392 | 0,00939832 |
| Vacuolar protein sorting 54 (yeast)                                         | <i>Vps54</i>             | -1,21603   | 0,00888068 |
| GAR1 ribonucleoprotein homolog (yeast)                                      | <i>Gar1</i>              | -1,2154116 | 0,00807736 |
| Heat shock protein 90 alpha (cytosolic), class B member 1                   | <i>Hsp90ab1</i>          | -1,2130992 | 0,00781176 |
